# Supplementary material for: Autism-like behaviors and abnormality of glucose metabolism in offspring derived from aging males with epigenetically modified sperm
Source: Aging (Albany NY). 2020 Oct 13;12(19):19766–84. doi: 10.18632/aging.104061 (PMC7732289; doi:10.18632/aging.104061)
Supplement: Supplementary Table 1 [file aging-12-104061-s002..xls]

## Sheet: Promoter
Supplementary Table 1. The information of differential methylation regions in gene promoters between young and 18-month old male mice sperm.
seqnames	start	end	width	strand	pvalue	qvalue	meth.diff	annotation	geneChr	geneStart	geneEnd	geneLength	geneStrand	AccId	transcriptId	distanceToTSS	flank_txIds	flank_AccIds	flank_gene_distances	coverage_18 months old F0 Sperm-1	numCs_18 months old F0 Sperm-1	numTs_18 months old F0 Sperm-1	coverage_18 months old F0 Sperm-2	numCs_18 months old F0 Sperm-2	numTs_18 months old F0 Sperm-2	coverage_young F0 Sperm-1	numCs_young F0 Sperm-1	numTs_young F0 Sperm-1	coverage_young F0 Sperm-2	numCs_young F0 Sperm-2	numTs_young F0 Sperm-2	coverage_young F0 Sperm-3	numCs_young F0 Sperm-3	numTs_young F0 Sperm-3
NT_166281.1	30001	31000	1000	*	5.89348e-05	0.0187333	28.4345	Promoter (2-3kb)	75	17602	27689	10088	2	LOC677525	XM_017318893.1	-2312	XR_001782933.1;XM_017318893.1	LOC108168675;LOC677525	0;-2312	21	20	1	38	36	2	17	13	4	6	4	2	23	13	10
NT_187029.1	27001	28000	1000	*	6.30955e-05	0.019705	40.6863	Promoter (<=1kb)	132	7825	27267	19443	2	4930438A08Rik	XM_003689172.5	0	XM_003689172.5	4930438A08Rik	0	14	14	0	5	5	0	10	5	5	17	9	8	8	6	2
chr10	5365001	5366000	1000	*	0.000186428	0.0395561	21.7942	Promoter (1-2kb)	10	5020203	5367948	347746	2	Syne1	XM_011243096.2	1948	XM_011243083.2;XM_011243096.2;XM_011243095.2;XM_011243094.2;XM_006512465.3;XM_011243089.2;XM_017314043.1;XM_017314048.1;XM_006512458.3;XM_011243084.2;XM_011243086.2;XM_011243090.2;XM_017314044.1;XM_011243091.2;XM_017314047.1;XM_017314046.1;XM_017314045.1;XM_011243093.1;XM_011243092.2;XM_011243097.2;NM_153399.2	Syne1;Syne1;Syne1;Syne1;Syne1;Syne1;Syne1;Syne1;Syne1;Syne1;Syne1;Syne1;Syne1;Syne1;Syne1;Syne1;Syne1;Syne1;Syne1;Syne1;Syne1	0;0;0;0;0;0;0;0;0;0;0;0;0;0;0;0;0;0;0;0;0	28	26	2	24	24	0	24	17	7	41	26	15	29	26	3
chr10	9898001	9899000	1000	*	8.65561e-06	0.00488509	25.0596	Promoter (2-3kb)	10	9755547	9901040	145494	2	Stxbp5	NM_001081344.2	2040	XR_001779713.1;NM_001081344.2;XM_006512926.3;XM_006512927.3;XM_006512928.2;XR_001779636.1;XR_380094.2;XR_380096.3;XR_380092.2;XM_011243237.2;XM_011243238.2;XM_011243236.2	LOC108167793;Stxbp5;Stxbp5;Stxbp5;Stxbp5;Stxbp5;Stxbp5;Stxbp5;Stxbp5;Stxbp5;Stxbp5;Stxbp5	-2313;0;0;0;0;0;0;0;0;0;0;0	18	17	1	37	36	1	54	35	19	49	35	14	42	32	10
chr10	19486001	19487000	1000	*	1.27178e-06	0.00116464	67.8939	Promoter (<=1kb)	10	19486633	19507031	20399	1	Gm33104	XR_380141.3	0	XR_380141.3;XR_380142.3;XR_380140.2	Gm33104;Gm33104;Gm33104	0;0;0	8	8	0	23	18	5	16	4	12	5	0	5	31	12	19
chr10	21995001	21996000	1000	*	8.80507e-10	3.26675e-06	-40.7012	Promoter (<=1kb)	10	21994666	21999903	5238	1	Sgk1	NM_011361.3	335	NM_001161845.2;NM_001161847.2;NM_001161848.2;NM_001161849.2;NM_001161850.2;NM_011361.3	Sgk1;Sgk1;Sgk1;Sgk1;Sgk1;Sgk1	0;0;0;0;0;0	48	0	48	66	18	48	58	28	30	30	21	9	76	34	42
chr10	22646001	22647000	1000	*	6.59065e-05	0.0202727	26.728	Promoter (<=1kb)	10	22645011	22703880	58870	1	Slc2a12	NM_178934.4	990	XM_011243176.2;XM_006512774.3;XM_006512775.3;NM_178934.4;XM_006512773.3	Slc2a12;Slc2a12;Slc2a12;Slc2a12;Slc2a12	0;0;0;0;-1778	21	21	0	5	5	0	23	19	4	37	15	22	30	29	1
chr10	30845001	30846000	1000	*	2.5817e-06	0.00200442	-25.8439	Promoter (2-3kb)	10	30832359	30842783	10425	2	Hey2	NM_013904.1	-2218	NM_013904.1	Hey2	-2218	52	19	33	54	2	52	75	38	37	65	34	31	63	22	41
chr10	31610001	31611000	1000	*	1.60254e-13	1.48383e-09	-50.8621	Promoter (<=1kb)	10	31501887	31609725	107839	2	Rnf217	NM_001146349.1	-276	NM_001146349.1	Rnf217	-276	20	10	10	29	14	15	34	34	0	15	15	0	21	21	0
chr10	34036001	34037000	1000	*	0.000141456	0.0332915	-44.437	Promoter (<=1kb)	10	34037597	34109815	72219	1	Trappc3l	NM_001162937.1	-597	NM_001081165.1;NM_001162937.1	Fam26d;Trappc3l	7313;-597	25	3	22	39	18	21	21	18	3	29	13	16	10	9	1
chr10	34296001	34297000	1000	*	4.45148e-10	1.80222e-06	-49.2832	Promoter (<=1kb)	10	34230214	34297405	67192	2	Gm26564	XR_380239.2	405	XR_380239.2;XR_380238.2;NM_030203.2	Gm26564;Gm26564;Tspyl4	0;0;-421	15	5	10	55	11	44	31	20	11	15	12	3	24	20	4
chr10	35711001	35712000	1000	*	6.54402e-10	2.53644e-06	-25.824	Promoter (<=1kb)	10	35708691	35711891	3201	2	Amd2	NM_007444.3	0	NM_007444.3	Amd2	0	69	28	41	125	34	91	93	53	40	27	16	11	159	100	59
chr10	39730001	39731000	1000	*	4.53352e-05	0.0157962	-47.1472	Promoter (1-2kb)	10	39621411	39732007	110597	2	E130307A14Rik	NR_038037.1	1007	NR_038037.1;XR_380057.3;XM_017313854.1;XM_006512622.2;XM_006512623.3;XM_006512624.3;NM_011264.3	E130307A14Rik;Rev3l;Rev3l;Rev3l;Rev3l;Rev3l;Rev3l	0;-1069;-1069;-1075;-1075;-1075;-1160	28	8	20	98	20	78	43	14	29	6	6	0	17	14	3
chr10	44170001	44171000	1000	*	0.000166161	0.0368536	25.257	Promoter (<=1kb)	10	44170447	44219585	49139	1	Speer5-ps1	NR_001582.2	0	NR_001582.2	Speer5-ps1	0	37	19	18	74	47	27	41	11	30	11	4	7	6	2	4
chr10	45470001	45471000	1000	*	4.70694e-05	0.016214	-30.5199	Promoter (<=1kb)	10	45376619	45470201	93583	2	Lin28b	NM_001031772.2	0	XM_011243183.2;XM_011243185.2;XM_011243180.2;XM_011243182.2;XM_011243186.2;XM_011243187.2;NM_001031772.2;XM_011243188.1	Lin28b;Lin28b;Lin28b;Lin28b;Lin28b;Lin28b;Lin28b;Lin28b	0;0;0;0;0;0;0;0	20	0	20	36	1	35	18	14	4	12	1	11	52	5	47
chr10	53299001	53300000	1000	*	6.3907e-10	2.48665e-06	-20.8519	Promoter (<=1kb)	10	53298967	53300191	1225	2	Gm17823	Gm17823	191	XM_006512494.3;XM_017313743.1;XM_017313744.1;NM_001204983.1;Gm17823	Cep85l;Cep85l;Cep85l;Cep85l;Gm17823	0;0;0;0;0	102	2	100	136	20	116	107	27	80	83	14	69	110	50	60
chr10	59670001	59671000	1000	*	5.99693e-06	0.0037434	24.0741	Promoter (<=1kb)	10	59664554	59670208	5655	2	Gm40672	XR_871745.1	0	XR_871745.1;XR_871746.1	Gm40672;Gm40672	0;0	30	29	1	33	33	0	24	22	2	10	7	3	36	22	14
chr10	61213001	61214000	1000	*	7.86262e-06	0.00453438	-33.6614	Promoter (1-2kb)	10	61215954	61219572	3619	1	Gm29861	XR_380475.2	-1954	NM_001081127.1;XR_380475.2;XR_380474.2;XR_871759.1	Adamts14;Gm29861;Gm29861;Gm29861	0;-1954;-3149;-3149	71	25	46	19	15	4	7	7	0	18	13	5	11	11	0
chr10	61649001	61650000	1000	*	1.37113e-09	4.81098e-06	-29.4805	Promoter (<=1kb)	10	61648621	61674165	25545	1	Ppa1	NM_026438.4	380	NM_026438.4	Ppa1	0	12	11	1	84	15	69	11	8	3	11	11	0	15	12	3
chr10	63337001	63338000	1000	*	3.6732e-07	0.000437807	-22.1109	Promoter (1-2kb)	10	63319005	63339035	20031	2	Sirt1	NM_001159589.2	1035	NM_001159589.2;NM_019812.3	Sirt1;Sirt1	0;0	120	55	65	133	39	94	49	27	22	84	58	26	122	67	55
chr10	67910001	67911000	1000	*	5.49384e-05	0.0180008	-38.6573	Promoter (1-2kb)	10	67886105	67912662	26558	2	Zfp365	NM_178679.2	1662	NM_178679.2	Zfp365	0	15	7	8	9	1	8	41	35	6	20	6	14	55	48	7
chr10	69313001	69314000	1000	*	1.60745e-08	3.77566e-05	-27.1041	Promoter (<=1kb)	10	69312041	69315424	3384	1	Gm40685	XR_871809.1	960	XR_871809.1	Gm40685	0	57	20	37	95	30	65	85	51	34	71	41	30	129	82	47
chr10	69534001	69535000	1000	*	4.28392e-05	0.0152182	-24.744	Promoter (<=1kb)	10	69533708	70027436	493729	1	Ank3	NM_170730.2	293	XM_011243299.1;XM_017313769.1;NM_146005.3;NM_170688.2;NM_170689.2;NM_170690.2;NM_170728.2;NM_170729.2;NM_170730.2	Ank3;Ank3;Ank3;Ank3;Ank3;Ank3;Ank3;Ank3;Ank3	0;0;0;0;0;0;0;0;0	73	16	57	37	8	29	61	25	36	47	28	19	59	23	36
chr10	71146001	71147000	1000	*	9.38402e-06	0.00518454	-34.5338	Promoter (1-2kb)	10	71148163	71149809	1647	1	Gm32025	Gm32025	-1163	XM_006514341.3;NM_031397.2;Gm32025;XR_380561.2	Bicc1;Bicc1;Gm32025;Gm34137	0;0;-1163;20345	33	15	18	65	41	24	20	18	2	13	12	1	44	37	7
chr10	76992001	76993000	1000	*	4.28553e-11	2.27954e-07	-34.5113	Promoter (<=1kb)	10	76963936	76991410	27475	2	Gm35721	XR_380585.2	-591	XR_380585.2	Gm35721	-591	65	40	25	70	40	30	38	35	3	35	34	1	39	36	3
chr10	80398001	80399000	1000	*	1.00606e-07	0.00015769	39.3849	Promoter (<=1kb)	10	80392539	80399494	6956	2	Mbd3	XM_006513303.3	494	XR_380610.2;XM_006513303.3;XM_006513301.3;NM_001306143.1;NM_013595.3;NM_025650.2	Gm30823;Mbd3;Mbd3;Mbd3;Mbd3;Uqcr11	10241;0;0;0;0;7821	10	5	5	36	14	22	5	0	5	80	3	77	35	4	31
chr10	83533001	83534000	1000	*	2.12536e-07	0.000283003	-55.7265	Promoter (<=1kb)	10	83487447	83534140	46694	2	Aldh1l2	NM_153543.2	140	NM_153543.2;XR_001779502.1	Aldh1l2;Aldh1l2	0;0	10	0	10	46	0	46	26	1	25	6	5	1	10	8	2
chr10	88147001	88148000	1000	*	1.51539e-07	0.000215868	-46.9927	Promoter (<=1kb)	10	88147071	88178395	31325	1	Nup37	NM_028334.4	0	XM_006514057.2;NM_027191.2;NM_028334.4;NM_029249.2;XM_011243597.1;XM_006514267.3;XM_006514269.3;XM_006514268.3;XM_017314130.1;XM_017314131.1;XM_017314132.1	Nup37;Nup37;Nup37;Parpbp;Parpbp;Parpbp;Parpbp;Parpbp;Parpbp;Parpbp;Parpbp	0;0;0;-60;-2980;-63;-62;-55;-64;-65;-65	26	16	10	25	1	24	56	46	10	21	12	9	10	10	0
chr10	88459001	88460000	1000	*	3.88989e-09	1.15771e-05	-35.5436	Promoter (<=1kb)	10	88459587	88473236	13650	1	Sycp3	NM_011517.2	0	NM_011517.2	Sycp3	0	65	8	57	6	1	5	70	30	40	25	11	14	68	43	25
chr10	89731001	89732000	1000	*	2.32143e-06	0.00184288	31.14	Promoter (<=1kb)	10	89711966	89732245	20280	2	Actr6	XM_006513965.1	245	XM_006513965.1;XM_017314062.1;XM_006513966.3;XM_006513967.3;XM_011243532.2;XM_017314063.1;NM_025914.2;XR_871945.2;XR_001779839.1;XR_001779840.1	Actr6;Actr6;Actr6;Actr6;Actr6;Actr6;Actr6;Gm30963;Gm30963;Gm30963	0;0;0;0;0;0;0;8397;9413;9413	21	20	1	55	46	9	47	0	47	44	34	10	42	41	1
chr10	90577001	90578000	1000	*	0.000144436	0.0337783	28.1099	Promoter (<=1kb)	10	90576693	90971673	394981	1	Anks1b	XM_006514313.3	308	XM_006514307.3;XM_006514311.2;XM_006514310.2;XM_006514308.2;XM_006514309.2;XM_006514304.2;XM_006514303.2;XM_017314153.1;XM_017314148.1;XM_017314150.1;XM_006514301.2;XM_006514302.2;XM_006514305.3;XM_006514306.2;XM_017314149.1;XM_017314151.1;XM_017314152.1;XM_017314154.1;XM_017314155.1;NM_001128086.2;XM_017314156.1;NM_001177397.1;XM_017314157.1;NM_001177396.1;NM_001177398.1;NM_181398.3;XM_006514312…	Anks1b;Anks1b;Anks1b;Anks1b;Anks1b;Anks1b;Anks1b;Anks1b;Anks1b;Anks1b;Anks1b;Anks1b;Anks1b;Anks1b;Anks1b;Anks1b;Anks1b;Anks1b;Anks1b;Anks1b;Anks1b;Anks1b;Anks1b;Anks1b;Anks1b;Anks1b;Anks1b;Anks1b	0;0;0;0;0;0;0;0;0;0;0;0;0;0;0;0;0;0;0;0;0;0;0;0;0;0;0;0	66	55	11	29	28	1	11	6	5	21	14	7	56	36	20
chr10	91101001	91102000	1000	*	0.000107184	0.0278908	23.5354	Promoter (<=1kb)	10	91100352	91102613	2262	1	Ikbip	XM_011243536.2	649	XM_017314068.1;XR_001779582.1;NM_026166.2;NM_027078.2;XM_011243536.2	Ikbip;Ikbip;Ikbip;Ikbip;Ikbip	18310;0;17962;0;0	14	14	0	11	11	0	10	9	1	11	9	2	33	19	14
chr10	94237001	94238000	1000	*	7.75016e-05	0.0225707	22.0267	Promoter (<=1kb)	10	94230565	94238611	8047	2	Gm32749	XR_871958.1	611	XR_380685.2;XR_380686.2;XR_871956.1;XR_871957.1;XR_871958.1	Gm32749;Gm32749;Gm32749;Gm32749;Gm32749	-3867;-3867;-3867;-3867;0	45	19	26	88	57	31	80	41	39	117	31	86	12	2	10
chr10	95635001	95636000	1000	*	2.2075e-05	0.00958102	-27.4699	Promoter (2-3kb)	10	95630503	95632244	1742	2	Gm33336	XR_871967.1	-2757	XR_871967.1	Gm33336	-2757	26	22	4	26	11	15	39	36	3	61	55	6	31	28	3
chr10	95844001	95845000	1000	*	4.66845e-06	0.00311854	-26.2987	Promoter (<=1kb)	10	95823970	95843156	19187	2	Gm33543	XR_871971.1	-845	XR_380700.2;XR_871968.1;XR_001779844.1;XR_001779845.1;XR_380705.2;XR_380706.2;XR_380707.2;XR_380709.2;XR_871970.1;XR_871971.1	Gm33377;Gm33377;Gm33543;Gm33543;Gm33543;Gm33543;Gm33543;Gm33543;Gm33543;Gm33543	0;-2797;-845;-845;-845;-845;-845;-845;-845;-845	11	6	5	28	26	2	58	58	0	54	54	0	11	11	0
chr10	98917001	98918000	1000	*	7.72381e-05	0.0225342	37.7262	Promoter (1-2kb)	10	98915152	99026143	110992	1	Atp2b1	NM_026482.2	1849	XR_001779588.1;XR_001779589.1;XR_001779587.1;XM_017314072.1;XM_006514015.3;XM_011243549.2;XM_011243548.2;XM_017314071.1;NM_026482.2	Atp2b1;Atp2b1;Atp2b1;Atp2b1;Atp2b1;Atp2b1;Atp2b1;Atp2b1;Atp2b1	0;0;0;0;0;0;0;0;0	14	10	4	33	23	10	34	14	20	25	6	19	15	5	10
chr10	109012001	109013000	1000	*	3.68182e-05	0.0137433	-38.1316	Promoter (1-2kb)	10	108497650	109010978	513329	2	Syt1	XM_017313867.1	-1023	XM_017313866.1;XM_017313868.1;XM_006513446.1;XM_006513449.1;NM_001252341.1;NM_001252342.1;NM_009306.3;XM_017313867.1	Syt1;Syt1;Syt1;Syt1;Syt1;Syt1;Syt1;Syt1	-2917;-2916;-2895;-2895;-1026;-1026;-1026;-1023	17	9	8	33	13	20	19	16	3	11	10	1	18	14	4
chr10	109852001	109853000	1000	*	0.000166507	0.0368949	-22.243	Promoter (<=1kb)	10	109681573	109852770	171198	2	Nav3	XM_011243454.1	0	XM_011243454.1;XM_006513676.2;XM_006513677.2;XM_017313945.1;XM_006513679.2;XM_006513680.2;XM_017313946.1;XM_017313947.1;NM_001081035.1;XM_006513675.3	Nav3;Nav3;Nav3;Nav3;Nav3;Nav3;Nav3;Nav3;Nav3;Nav3	0;0;0;0;0;0;0;0;0;0	46	6	40	105	23	82	26	7	19	59	17	42	41	26	15
chr10	111502001	111503000	1000	*	5.02897e-05	0.0168757	52.2483	Promoter (1-2kb)	10	111500788	111501345	558	1	Gm5176	NR_033603.1	1213	NR_033603.1;XM_006513893.3;XR_001779558.1;NM_001146707.1;XM_006513890.3;NM_009344.3	Gm5176;Nap1l1;Nap1l1;Nap1l1;Nap1l1;Phlda1	1213;28810;28802;21384;20782;-3286	5	5	0	18	15	3	11	6	5	12	3	9	31	12	19
chr10	111595001	111596000	1000	*	0.000228738	0.0446948	-29.6952	Promoter (<=1kb)	10	111595121	111611352	16232	1	Gm30262	XR_380797.3	0	NR_045344.1;XR_380793.3;XR_380794.3;XR_001779640.1;XR_380797.3;XR_872041.1;XR_380792.2;XR_380796.2;XR_872036.1;XR_872037.1;XR_380798.3;XR_872040.2	4933440J02Rik;Gm30262;Gm30262;Gm30262;Gm30262;Gm30262;Gm30262;Gm30262;Gm30262;Gm30262;Gm30262;Gm30262	-728;0;0;0;0;0;0;0;0;-1753;-3462;-3726	11	4	7	40	5	35	24	12	12	5	3	2	21	11	10
chr10	117175001	117176000	1000	*	1.98077e-07	0.000267672	28.0414	Promoter (1-2kb)	10	117177625	117181110	3486	1	4930423D24Rik	XR_380819.2	-1625	XR_380819.2;XR_001779647.1	4930423D24Rik;Gm40769	-1625;4878	35	35	0	59	58	1	12	4	8	5	5	0	10	8	2
chr10	117794001	117795000	1000	*	3.2078e-07	0.000394564	45.0436	Promoter (1-2kb)	10	117750621	117792737	42117	2	Nup107	XM_006513018.3	-1264	XM_006513018.3;NM_134010.2	Nup107;Nup107	-1264;-1296	27	26	1	20	18	2	17	10	7	15	4	11	34	20	14
chr10	117874001	117875000	1000	*	0.000103309	0.0271794	-22.4164	Promoter (1-2kb)	10	117876559	117906161	29603	1	Gm32605	XR_872076.2	-1559	XR_872076.2;XR_872074.2	Gm32605;Gm32605	-1559;-2129	7	6	1	20	11	9	26	24	2	45	44	1	17	15	2
chr10	119074001	119075000	1000	*	3.70486e-05	0.0137932	21.9173	Promoter (1-2kb)	10	119067405	119076223	8819	2	Gm33861	XR_380851.2	1223	XR_380851.2;XR_001779652.1;XR_380850.2	Gm33861;Gm33861;Gm33861	0;0;0	28	28	0	7	7	0	41	26	15	16	14	2	24	20	4
chr10	119413001	119414000	1000	*	8.20561e-05	0.0233978	-25.5546	Promoter (<=1kb)	10	119413444	119426864	13421	1	1700025F24Rik	NR_040578.1	0	NR_040578.1;XR_872101.1	1700025F24Rik;Gm40778	0;-1156	31	4	27	35	6	29	11	6	5	16	3	13	64	31	33
chr10	119691001	119692000	1000	*	8.32827e-05	0.0236263	31.5433	Promoter (<=1kb)	10	119690099	120087267	397169	1	Grip1	XM_006514239.2	902	XM_017314126.1;XM_006514238.2;XM_006514242.3;NM_001277292.1;NM_133442.2;NM_001277293.1;XM_006514235.2;XM_006514239.2	Grip1;Grip1;Grip1;Grip1;Grip1;Grip1;Grip1;Grip1	0;0;0;0;0;0;0;0	23	19	4	5	3	2	31	17	14	35	14	21	45	11	34
chr10	120113001	120114000	1000	*	2.23393e-20	4.46787e-16	-23.1273	Promoter (<=1kb)	10	120089787	120113015	23229	2	Helb	XM_017313781.1	0	NM_080446.2;XM_017313781.1	Helb;Helb	-36;0	248	49	199	302	60	242	245	117	128	211	74	137	337	155	182
chr10	120226001	120227000	1000	*	0.000177065	0.0382646	-34.1382	Promoter (<=1kb)	10	120227060	120232070	5011	1	Llph	NM_025431.2	-60	XR_001779655.1;NM_025431.2;XM_006513954.1;NM_026617.3	Gm40782;Llph;Llph;Tmbim4	3871;-60;-130;17175	26	16	10	60	15	45	18	13	5	15	9	6	6	6	0
chr10	120531001	120532000	1000	*	0.000112758	0.0288348	-41.1111	Promoter (2-3kb)	10	120528444	120538045	9602	1	Gm34952	XR_380876.2	2557	XR_380876.2	Gm34952	0	5	3	2	10	0	10	20	18	2	10	4	6	12	10	2
chr10	120687001	120688000	1000	*	0.000213733	0.0428838	-34.5939	Promoter (<=1kb)	10	120688412	120695179	6768	1	Gm35062	XR_872122.1	-412	XR_872122.1	Gm35062	-412	23	3	20	24	23	1	15	12	3	10	10	0	31	27	4
chr10	121031001	121032000	1000	*	1.20572e-07	0.000181584	53.2723	Promoter (2-3kb)	10	121034004	121100642	66639	1	Wif1	NM_011915.2	-2004	XR_872123.1;NM_011915.2	Gm40784;Wif1	8353;-2004	6	6	0	13	13	0	13	9	4	21	10	11	30	7	23
chr10	121309001	121310000	1000	*	4.92958e-05	0.0166765	40.7672	Promoter (1-2kb)	10	121264150	121311065	46916	2	Tbc1d30	XM_006514253.3	1065	NM_029057.1;XM_006514253.3	Tbc1d30;Tbc1d30	0;0	42	23	19	7	4	3	18	1	17	5	2	3	5	0	5
chr10	123208001	123209000	1000	*	1.1283e-05	0.00591042	-20.0794	Promoter (2-3kb)	10	123207950	123211644	3695	2	Gm36628	XR_380910.2	2644	XR_380910.2;XR_001779701.1;XR_380909.2	Gm36628;Gm36628;Gm36628	0;2644;2644	45	6	39	21	1	20	28	7	21	10	1	9	63	33	30
chr10	127115001	127116000	1000	*	4.26119e-08	8.24215e-05	-26.9217	Promoter (1-2kb)	10	127107362	127113573	6212	2	Gm40799	XR_872170.1	-1428	XR_872170.1;NM_001171026.1;NM_177614.3;XM_011243420.1	Gm40799;Os9;Os9;Os9	-1428;0;0;0	26	7	19	20	18	2	102	99	3	22	13	9	23	23	0
chr10	128546001	128547000	1000	*	1.97633e-07	0.000267672	44.2653	Promoter (<=1kb)	10	128543563	128547685	4123	2	Zc3h10	XM_006513013.2	685	Gm9176;NM_018860.4;XM_006513013.2;NM_134003.1	Gm9176;Rpl41;Zc3h10;Zc3h10	0;0;0;0	27	22	5	46	30	16	36	14	22	25	3	22	22	8	14
chr10	128549001	128550000	1000	*	2.15438e-15	2.56474e-11	-55.0942	Promoter (<=1kb)	10	128548110	128549168	1059	2	Rpl41	NM_018860.4	0	Gm9176;NM_018860.4;XM_006513013.2;NM_134003.1	Gm9176;Rpl41;Zc3h10;Zc3h10	0;0;0;0	11	5	6	96	9	87	31	23	8	5	5	0	15	11	4
chr10	130536001	130537000	1000	*	4.39239e-06	0.00297991	23.7385	Promoter (<=1kb)	10	130535229	130536024	796	2	Gm35405	Gm35405	0	Gm35405	Gm35405	0	72	54	18	66	45	21	77	43	34	28	13	15	109	45	64
chr11	5104001	5105000	1000	*	0.000122655	0.0302703	33.3333	Promoter (2-3kb)	11	5099967	5101417	1451	2	LOC108167880	XR_001780157.1	-2584	XM_006514525.3;XM_006514524.2;XM_006514518.3;XM_006514522.3;XR_380959.1;XM_006514521.3;XM_006514514.3;XM_006514516.3;XM_006514515.3;NM_080595.2;XM_006514517.2;NM_001283061.1;NM_001283062.1;NM_007968.3;XM_006514508.2;XM_006514509.2;XM_006514510.2;XM_006514511.2;XM_017314255.1;XR_001779874.1;XM_006514512.3;NM_001283063.1;XM_017314880.1;XR_001780157.1;XM_006514715.2;NM_001290491.1;NM_001290492.1;NM_…	Emid1;Emid1;Emid1;Emid1;Emid1;Emid1;Emid1;Emid1;Emid1;Emid1;Emid1;Ewsr1;Ewsr1;Ewsr1;Ewsr1;Ewsr1;Ewsr1;Ewsr1;Ewsr1;Ewsr1;Ewsr1;Ewsr1;LOC108167339;LOC108167880;Rhbdd3;Rhbdd3;Rhbdd3;Rhbdd3;Rhbdd3;Rhbdd3;Rhbdd3;Rhbdd3	29410;31084;46110;46352;47240;47272;47296;47296;47297;47222;47297;-4913;-4913;-4913;-4902;-4902;-4902;-4902;-4902;-4902;-4902;-4913;6838;-2584;0;0;0;0;0;0;0;0	10	10	0	17	17	0	5	3	2	10	8	2	15	9	6
chr11	5518001	5519000	1000	*	4.20594e-08	8.17232e-05	-24.7334	Promoter (1-2kb)	11	5520641	5525993	5353	1	Xbp1	NM_001271730.1	-1641	NM_001271730.1;NM_013842.3	Xbp1;Xbp1	-1641;-1641	29	28	1	40	21	19	45	44	1	12	12	0	33	33	0
chr11	6273001	6274000	1000	*	3.19277e-08	6.54257e-05	-35.7143	Promoter (<=1kb)	11	6270714	6274837	4124	2	Tmed4	NM_134020.1	837	XM_017314650.1;NM_134020.1	Ddx56;Tmed4	-4610;0	27	24	3	63	18	45	5	5	0	16	16	0	36	30	6
chr11	6292001	6293000	1000	*	0.000210642	0.0425195	-25.4827	Promoter (<=1kb)	11	6291531	6292269	739	2	LOC108167883	XM_017314881.1	0	XM_017314881.1;NM_001252282.1;NM_001252283.1;NM_001252287.1;NM_010956.4;XM_006514586.3;XM_006514583.3;XM_006514585.2;XM_006514582.2;XM_006514584.3;NM_001252288.1;XM_017314337.1	LOC108167883;Ogdh;Ogdh;Ogdh;Ogdh;Ogdh;Ogdh;Ogdh;Ogdh;Ogdh;Ogdh;Ogdh	0;0;0;0;0;0;0;0;0;0;0;0	40	1	39	98	3	95	10	1	9	17	3	14	7	4	3
chr11	6474001	6475000	1000	*	4.29819e-05	0.015258	27.5688	Promoter (1-2kb)	11	6467599	6476076	8478	2	Purb	NM_011221.3	1076	NM_011221.3	Purb	0	17	6	11	16	7	9	65	1	64	48	14	34	97	5	92
chr11	16750001	16751000	1000	*	0.000163137	0.0363983	38.0638	Promoter (1-2kb)	11	16752203	16887658	135456	1	Egfr	NM_007912.4	-1203	NM_007912.4;NM_207655.2	Egfr;Egfr	-1203;-1203	19	18	1	18	17	1	11	3	8	26	18	8	26	19	7
chr11	24073001	24074000	1000	*	5.91041e-07	0.000640348	37.8129	Promoter (2-3kb)	11	24033275	24076359	43085	2	Gm33232	XR_381103.3	2359	XM_006514504.3;XM_006514506.2;XM_006514505.2;XM_011243660.1;XM_011243659.2;NM_001242934.1;NM_001159289.1;NM_016707.3;XR_381103.3	Bcl11a;Bcl11a;Bcl11a;Bcl11a;Bcl11a;Bcl11a;Bcl11a;Bcl11a;Gm33232	-2544;-3438;-3704;-3880;0;-4056;0;0;0	25	6	19	22	14	8	53	1	52	31	5	26	6	0	6
chr11	24173001	24174000	1000	*	1.25253e-06	0.00114806	-26.1559	Promoter (<=1kb)	11	24160526	24172824	12299	2	4930538E20Rik	XR_872319.2	-177	XR_872319.2;XM_006514504.3;XM_006514506.2;XM_006514505.2;XM_011243660.1;XM_011243659.2;NM_001242934.1;NM_001159289.1;NM_016707.3;XM_006514507.2;NM_001159290.1	4930538E20Rik;Bcl11a;Bcl11a;Bcl11a;Bcl11a;Bcl11a;Bcl11a;Bcl11a;Bcl11a;Bcl11a;Bcl11a	-177;96457;95563;95297;95121;0;94945;0;0;92367;0	79	51	28	55	31	24	42	28	14	44	44	0	44	41	3
chr11	30026001	30027000	1000	*	4.18212e-06	0.00287431	-27.619	Promoter (<=1kb)	11	29743044	30026035	282992	2	Eml6	XM_006514694.3	0	XM_006514694.3;XR_001779999.1;NM_146016.2;XM_017314514.1;XM_017314515.1;XM_017314516.1;XM_017314517.1;XM_017314513.1	Eml6;Eml6;Eml6;Eml6;Eml6;Eml6;Eml6;Eml6	0;0;0;0;0;0;0;0	44	0	44	5	0	5	10	0	10	5	2	3	21	9	12
chr11	35980001	35981000	1000	*	9.44315e-29	3.37255e-24	20.1646	Promoter (<=1kb)	11	35839178	35980089	140912	2	Wwc1	NM_170779.1	0	NM_170779.1	Wwc1	0	62	1	61	351	158	193	75	1	74	28	2	26	103	1	102
chr11	39589001	39590000	1000	*	7.16946e-08	0.000121723	34.0125	Promoter (<=1kb)	11	39588168	39696513	108346	1	Gm33963	XR_388578.2	833	XR_388578.2	Gm33963	0	74	31	43	43	25	18	33	7	26	51	8	43	36	4	32
chr11	41498001	41499000	1000	*	3.46497e-06	0.00251632	25.997	Promoter (<=1kb)	11	41498677	41500911	2235	1	Hspd1-ps3	Hspd1-ps3	0	Hspd1-ps3	Hspd1-ps3	0	46	21	25	93	50	43	42	12	30	19	3	16	127	34	93
chr11	41999001	42000000	1000	*	6.15586e-06	0.00381404	45.6863	Promoter (<=1kb)	11	41910190	42000714	90525	2	Gabrg2	NM_008073.3	714	NM_008073.3;NM_177408.6;XM_006532200.2;XM_006532199.1	Gabrg2;Gabrg2;Gabrg2;Gabrg2	0;0;0;0	17	11	6	15	6	9	5	0	5	5	1	4	18	0	18
chr11	42418001	42419000	1000	*	1.45393e-06	0.00128666	-41.7284	Promoter (<=1kb)	11	42419757	42632591	212835	1	Gabrb2	NM_008070.3	-757	NM_008070.3;XM_017314261.1;XM_011248726.1;XR_879803.1;XR_388590.3	Gabrb2;Gabrb2;Gabrb2;Gm34591;Gm34591	-757;-1071;-2276;-1304;0	69	16	53	120	31	89	26	17	9	5	4	1	15	8	7
chr11	43475001	43476000	1000	*	8.55933e-08	0.00013963	39.4176	Promoter (<=1kb)	11	43474306	43491525	17220	1	C1qtnf2	NM_026979.5	695	NM_026979.5;LOC102638276	C1qtnf2;LOC102638276	0;-777	10	10	0	73	64	9	36	13	23	21	12	9	30	21	9
chr11	45943001	45944000	1000	*	0.000193543	0.0404817	-31.5686	Promoter (<=1kb)	11	45928269	45944935	16667	2	Lsm11	NM_028185.2	935	XM_011249271.2;NM_028185.2;NM_001290737.1;NM_001080969.3;XM_011249180.2;XM_011249179.1	Lsm11;Lsm11;Thg1l;Thg1l;Thg1l;Thg1l	0;0;11188;11503;11070;11364	21	5	16	34	8	26	21	18	3	15	8	7	15	4	11
chr11	46058001	46059000	1000	*	2.79509e-05	0.0113253	-55.0385	Promoter (2-3kb)	11	46055984	46147347	91364	1	Adam19	NM_009616.4	2017	NM_001291890.1;NM_001291891.1;NM_009616.4	Adam19;Adam19;Adam19	0;0;0	6	1	5	12	2	10	63	52	11	44	18	26	12	11	1
chr11	55121001	55122000	1000	*	4.03816e-05	0.0146204	-26.4832	Promoter (2-3kb)	11	55117994	55118892	899	2	Gm12231	Gm12231	-2109	Gm12231;XM_011248900.1;XM_011248899.1;XM_017314432.1;XM_006532829.3;XM_011248898.2;NM_172258.3	Gm12231;Slc36a3;Slc36a3;Slc36a3;Slc36a3;Slc36a3;Slc36a3	-2109;15760;29238;29725;29726;29726;29706	25	16	9	36	24	12	27	25	2	35	35	0	35	29	6
chr11	58846001	58847000	1000	*	0.000257692	0.0480795	50	Promoter (<=1kb)	11	58847119	58861957	14839	1	LOC108167848	XM_017314865.1	-119	XM_017314865.1;NM_146537.2	LOC108167848;Olfr311	-119;4885	7	7	0	6	6	0	12	6	6	6	0	6	6	6	0
chr11	62744001	62745000	1000	*	1.94606e-06	0.00162036	27.427	Promoter (1-2kb)	11	62746015	62746086	72	2	n-TWcca8	rna67652	1086	Wsb2-ps;rna67652	Wsb2-ps;n-TWcca8	6346;1086	61	33	28	106	58	48	34	14	20	31	5	26	55	13	42
chr11	67770001	67771000	1000	*	5.34541e-07	0.000589351	-23.6555	Promoter (<=1kb)	11	67663784	67770912	107129	2	Glp2r	XM_006534562.3	0	XM_006534562.3;XM_006534561.3;NM_175681.3;XM_618894.5	Glp2r;Glp2r;Glp2r;Gsg1l2	0;0;0;-3406	77	59	18	101	38	63	74	59	15	42	38	4	122	88	34
chr11	69614001	69615000	1000	*	1.78893e-05	0.00825915	25.2828	Promoter (2-3kb)	11	69614816	69617905	3090	2	Shbg	NM_011367.2	2905	XM_011248838.2;XM_011248837.2;NM_011367.2	Shbg;Shbg;Shbg	0;0;0	30	6	24	48	24	24	12	0	12	62	2	60	54	14	40
chr11	69621001	69622000	1000	*	0.000256231	0.047886	28.5913	Promoter (<=1kb)	11	69621996	69624032	2037	1	Sat2	XM_006534111.3	0	XM_006534111.3;XM_006534112.3;XM_006534110.2;NM_026991.2;XM_011248838.2;XM_011248837.2;NM_011367.2	Sat2;Sat2;Sat2;Sat2;Shbg;Shbg;Shbg	0;0;0;-109;0;0;0	7	2	5	16	14	2	20	11	9	27	0	27	24	8	16
chr11	69628001	69629000	1000	*	3.52936e-06	0.00255566	-22.0388	Promoter (2-3kb)	11	69630154	69631881	1728	2	LOC108167907	LOC108167907	2881	NM_011814.2;LOC108167907;XM_006534111.3;XM_006534112.3;XM_006534110.2;NM_026991.2	Fxr2;LOC108167907;Sat2;Sat2;Sat2;Sat2	-3971;2881;0;0;0;5892	38	26	12	33	18	15	11	11	0	5	3	2	106	96	10
chr11	72689001	72690000	1000	*	0.000104289	0.0273581	22.0776	Promoter (<=1kb)	11	72690002	72772146	82145	1	Ankfy1	NM_009671.5	-2	NM_009671.5;NM_025985.4	Ankfy1;Ube2g1	-2;81740	27	12	15	25	10	15	25	8	17	5	1	4	83	7	76
chr11	81573001	81574000	1000	*	1.7073e-05	0.00800367	-22.1984	Promoter (<=1kb)	11	81572502	81573539	1038	2	1700071K01Rik	NM_001033765.2	0	NM_001033765.2;NM_001034013.2	1700071K01Rik;Asic2	0;0	102	33	69	65	24	41	27	16	11	10	5	5	80	49	31
chr11	86483001	86484000	1000	*	4.02499e-05	0.0145992	-41.7912	Promoter (<=1kb)	11	86484657	86499007	14351	1	Rnft1	NM_029788.5	-657	NM_029788.5	Rnft1	-657	35	10	25	6	1	5	25	16	9	10	6	4	39	27	12
chr11	87665001	87666000	1000	*	6.60826e-06	0.00400845	32.6852	Promoter (1-2kb)	11	87663652	87735539	71888	1	Rnf43	XM_011248844.2	1349	NM_172448.3;XM_011248844.2	Rnf43;Rnf43	0;0	13	13	0	20	19	1	6	5	1	6	4	2	27	12	15
chr11	95040001	95041000	1000	*	7.55538e-05	0.0222086	45.8333	Promoter (<=1kb)	11	95026258	95040892	14635	2	Pdk2	XM_006532457.3	0	XR_001780300.1;XR_001780301.1;XR_880156.2;NM_001306071.1;XM_006532311.3;NM_013565.3;XM_006532310.3;NM_001306162.1;XM_006532457.3;NM_133667.2	Gm11513;Gm11513;Gm11513;Itga3;Itga3;Itga3;Itga3;Itga3;Pdk2;Pdk2	8993;8993;8993;28198;35336;35714;35757;35811;0;0	6	5	1	12	1	11	25	0	25	5	0	5	10	0	10
chr11	95042001	95043000	1000	*	0.000132488	0.0318482	27.7143	Promoter (<=1kb)	11	95026258	95041371	15114	2	Pdk2	NM_133667.2	-630	XR_001780300.1;XR_001780301.1;XR_880156.2;NM_001306071.1;XM_006532311.3;NM_013565.3;XM_006532310.3;NM_001306162.1;XM_006532457.3;NM_133667.2	Gm11513;Gm11513;Gm11513;Itga3;Itga3;Itga3;Itga3;Itga3;Pdk2;Pdk2	10993;10993;10993;26198;33336;33714;33757;33811;0;0	14	14	0	6	6	0	25	6	19	17	17	0	14	13	1
chr11	97796001	97797000	1000	*	0.000221296	0.043873	-29.1303	Promoter (<=1kb)	11	97797072	97797143	72	1	n-TCgca56	rna70405	-72	XM_006532341.1;NM_010688.4;rna70406;rna70405	Lasp1;Lasp1;n-TCgca51;n-TCgca56	-2005;-2672;1977;-72	29	19	10	25	11	14	120	98	22	5	4	1	10	9	1
chr11	97883001	97884000	1000	*	2.29043e-05	0.00981754	-30.4355	Promoter (<=1kb)	11	97851558	97884139	32582	2	Fbxo47	XM_006534328.3	139	XM_006534328.3;XM_006534329.3;XM_011249279.2;XM_006534332.2;XM_006534330.3;NM_001081435.1	Fbxo47;Fbxo47;Fbxo47;Fbxo47;Fbxo47;Fbxo47	0;0;0;0;0;0	73	1	72	15	1	14	5	0	5	7	6	1	17	3	14
chr11	99229001	99230000	1000	*	7.92423e-05	0.0228627	-37.0057	Promoter (1-2kb)	11	99209047	99231017	21971	2	Smarce1	NM_020618.4	1017	XM_006533412.3;NM_172946.2;NM_020618.4;XM_006533827.3;XM_006533828.2;XM_011249158.1	Krt222;Krt222;Smarce1;Smarce1;Smarce1;Smarce1	14283;14067;0;0;0;0	25	3	22	16	12	4	22	19	3	16	15	1	57	35	22
chr11	100357001	100358000	1000	*	2.19932e-05	0.00955397	24.5397	Promoter (<=1kb)	11	100347327	100356350	9024	2	Hap1	XM_011248745.2	-651	Gm10039;NM_010404.3;NM_177981.2;XM_011248744.2;XM_011248745.2;XM_011248746.2	Gm10039;Hap1;Hap1;Hap1;Hap1;Hap1	4157;-860;-860;-655;-651;-653	43	33	10	45	37	8	39	20	19	30	21	9	62	27	35
chr11	101953001	101954000	1000	*	7.50068e-05	0.0221259	-51.5079	Promoter (<=1kb)	11	101952421	101960574	8154	1	4930417O22Rik	NR_045806.1	580	NR_045806.1	4930417O22Rik	0	12	2	10	21	8	13	16	8	8	15	13	2	10	10	0
chr11	101986001	101987000	1000	*	4.42838e-11	2.33298e-07	-59.761	Promoter (<=1kb)	11	101971141	101986977	15837	2	Dusp3	XM_006534305.2	0	NM_029287.1;XM_006534305.2;XM_006534306.1;NM_028207.3	1700006E09Rik;Dusp3;Dusp3;Dusp3	-56;0;0;-1210	58	2	56	23	1	22	62	11	51	20	17	3	17	15	2
chr11	102924001	102925000	1000	*	8.1842e-09	2.15942e-05	-21.9294	Promoter (<=1kb)	11	102905518	102925124	19607	2	Kif18b	NM_197959.2	124	NM_197959.2;XM_011249243.1	Kif18b;Kif18b	0;0	117	18	99	29	19	10	42	28	14	23	16	7	55	28	27
chr11	103029001	103030000	1000	*	0.000259372	0.0482643	-35.5135	Promoter (<=1kb)	11	103028562	103066105	37544	1	Nmt1	NM_008707.3	439	XM_006534038.2;XM_006532445.3;NM_008707.3	Dcakd;Nmt1;Nmt1	-762;0;0	10	4	6	44	15	29	36	28	8	22	21	1	54	24	30
chr11	105127001	105128000	1000	*	1.81031e-05	0.00832085	44.0664	Promoter (<=1kb)	11	105126432	105139554	13123	1	Mettl2	XM_006533714.1	569	NM_172567.3;XM_006533715.2;XM_006533714.1	Mettl2;Mettl2;Mettl2	0;0;0	37	25	12	16	13	3	25	11	14	37	10	27	5	1	4
chr11	105179001	105180000	1000	*	1.75193e-05	0.00814852	-23.2775	Promoter (<=1kb)	11	105178807	105283959	105153	1	Tlk2	NM_001294331.1	194	NR_027956.1;XR_001780005.1;XM_006533316.3;XM_006533314.3;XM_006533315.3;XM_017314551.1;XM_017314550.1;NM_001294331.1;XM_006533312.3;NM_001294330.1;NM_001294334.1;XR_001780006.1;NM_001112705.2;NM_001294329.1;XM_017314552.1;XM_011249014.2;XM_006533320.3;XM_006533313.3	1700052K11Rik;Tlk2;Tlk2;Tlk2;Tlk2;Tlk2;Tlk2;Tlk2;Tlk2;Tlk2;Tlk2;Tlk2;Tlk2;Tlk2;Tlk2;Tlk2;Tlk2;Tlk2	0;0;0;0;0;0;0;0;-497;-1527;-1527;-1527;-1527;-1527;-1531;-1532;-2073;-2073	7	7	0	19	7	12	34	34	0	29	25	4	36	32	4
chr11	108345001	108346000	1000	*	3.73277e-09	1.11759e-05	-24.1538	Promoter (<=1kb)	11	108344359	108349578	5220	1	LOC108167932	XR_001780347.1	642	XR_001780347.1;NM_011101.3	LOC108167932;Prkca	0;0	63	42	21	57	46	11	30	30	0	42	40	2	58	57	1
chr11	109471001	109472000	1000	*	0.000254619	0.0477082	-27.7118	Promoter (1-2kb)	11	109452808	109473111	20304	2	Slc16a6	XM_006531946.3	1111	XM_006534348.2;XM_006534349.3;NM_028710.3;NM_134038.2;NM_001029842.1;XM_006531947.2;XM_006531946.3;XM_017314216.1	Arsg;Arsg;Arsg;Slc16a6;Slc16a6;Slc16a6;Slc16a6;Slc16a6	-1334;-1341;-1374;0;0;-4642;0;0	54	19	35	71	16	55	42	3	39	38	28	10	27	24	3
chr11	111658001	111659000	1000	*	2.46407e-05	0.0103402	-22.094	Promoter (<=1kb)	11	111637329	111658655	21327	2	Gm30219	XR_389112.1	0	XR_001780139.1;XR_880296.1;XR_389112.1;XR_389110.1	Gm30219;Gm30219;Gm30219;Gm30219	0;-1070;0;0	36	14	22	5	4	1	30	23	7	30	25	5	26	22	4
chr11	116025001	116026000	1000	*	0.000162995	0.0363945	41.2589	Promoter (<=1kb)	11	116022291	116025450	3160	2	H3f3b	XM_006532248.2	0	NM_008211.3;XM_006532248.2;XR_001779963.1;XR_001779964.1;XR_001779962.1;XM_006533088.3;XM_006533089.2;NM_001286006.1;NM_172569.4;XM_017314490.1	H3f3b;H3f3b;Unk;Unk;Unk;Unk;Unk;Unk;Unk;Unk	-497;0;-2467;-2467;-2469;-2470;-2470;-4316;-4316;-4518	18	18	0	21	20	1	29	21	8	6	1	5	25	20	5
chr11	116199001	116200000	1000	*	4.12999e-13	3.5913e-09	-26.9908	Promoter (<=1kb)	11	116171883	116199045	27163	2	Acox1	NM_001271898.1	0	NM_001271898.1;NM_015729.3;XM_006532002.3;NM_027107.1	Acox1;Acox1;Acox1;Ten1	0;0;-140;0	54	0	54	10	0	10	5	0	5	43	27	16	11	2	9
chr11	120457001	120458000	1000	*	1.06502e-08	2.67593e-05	-63.7143	Promoter (<=1kb)	11	120456601	120458050	1450	2	Oxld1	XM_006533941.3	50	NM_152807.3;XM_006533981.1;XM_006533982.2;XM_006533941.3;NM_025560.2;NM_012065.3;NR_126089.1	Ccdc137;Ccdc137;Ccdc137;Oxld1;Oxld1;Pde6g;Pde6g	-129;-142;-1583;0;0;-3501;-3501	15	0	15	5	0	5	28	16	12	25	21	4	36	18	18
chr11	121831001	121832000	1000	*	3.50942e-05	0.0132808	43.4524	Promoter (<=1kb)	11	121830240	121840311	10072	1	Ptchd3	XM_006534383.3	761	NM_029049.1;XM_006534383.3	Ptchd3;Ptchd3	0;0	6	6	0	14	13	1	56	19	37	10	5	5	36	27	9
chr12	4768001	4769000	1000	*	7.73287e-09	2.06339e-05	-29.6324	Promoter (<=1kb)	12	4738397	4768996	30600	2	Fam228b	XM_006515036.3	0	XM_006515036.3;XM_006515031.2;XM_006515029.3;XM_006515033.3;XM_006515035.3;XM_006515038.3;XM_011243844.2;XM_011243847.2;XM_011243849.2;XM_006515030.2;XR_001780441.1;XR_001780442.1;XM_006515037.3;XM_006515032.3;XM_011243848.2;XM_011243850.2;XM_011243846.2;NM_175431.4;XM_017315009.1;XM_006515140.2;NM_028376.3;XM_006515139.2;XM_006515138.2;XM_006515141.3	Fam228b;Fam228b;Fam228b;Fam228b;Fam228b;Fam228b;Fam228b;Fam228b;Fam228b;Fam228b;Fam228b;Fam228b;Fam228b;Fam228b;Fam228b;Fam228b;Fam228b;Fam228b;Fam228b;Pfn4;Pfn4;Pfn4;Pfn4;Pfn4	0;0;0;0;0;0;0;0;0;0;0;0;0;0;0;0;0;0;0;-167;-295;-339;-367;-4627	10	0	10	66	0	66	15	6	9	17	3	14	32	10	22
chr12	15813001	15814000	1000	*	0.000252099	0.0474315	24.4619	Promoter (2-3kb)	12	15791727	15816785	25059	2	Trib2	NM_144551.5	2785	XR_001780549.1;XR_001780550.1;XR_001780551.1;XM_006515054.1;XM_006515055.2;NM_144551.5	Gm5432;Gm5432;Gm5432;Trib2;Trib2;Trib2	-2951;-2951;-2951;0;0;0	36	31	5	16	8	8	26	17	9	16	5	11	41	14	27
chr12	16586001	16587000	1000	*	1.51619e-05	0.00732459	-32.3708	Promoter (2-3kb)	12	16537338	16589720	52383	2	Lpin1	XM_006514986.3	2720	NM_001130412.1;NM_015763.4;NM_172950.3;XM_006514975.3;XM_006514988.3;XM_006514977.3;XM_006514986.3;XM_011243815.2;XM_006514984.3;XM_006514983.3;XM_006514987.3;XM_006514982.3;XM_006514976.3;XM_006514978.3	Lpin1;Lpin1;Lpin1;Lpin1;Lpin1;Lpin1;Lpin1;Lpin1;Lpin1;Lpin1;Lpin1;Lpin1;Lpin1;Lpin1	0;0;0;0;0;0;0;0;0;0;0;0;0;0	10	8	2	22	10	12	34	29	5	17	17	0	21	21	0
chr12	17325001	17326000	1000	*	3.02728e-06	0.00227958	27.2822	Promoter (<=1kb)	12	17284722	17325373	40652	2	Atp6v1c2	XM_006515196.3	0	NM_001159632.1;NM_133699.2;XM_006515199.3;XM_006515198.3;XM_006515196.3;XM_017315175.1	Atp6v1c2;Atp6v1c2;Atp6v1c2;Atp6v1c2;Atp6v1c2;Atp6v1c2	-271;-271;-214;-212;0;0	49	37	12	41	41	0	69	44	25	64	35	29	81	51	30
chr12	22701001	22702000	1000	*	3.20959e-08	6.56358e-05	24.8227	Promoter (2-3kb)	12	22408743	22698729	289987	2	Gm9295	XM_017315309.1	-2272	XM_017315309.1;XM_011243951.2	Gm9295;Gm9295	-2272;-3319	64	60	4	64	63	1	13	10	3	38	23	15	55	42	13
chr12	30469001	30470000	1000	*	9.15081e-05	0.0252182	-61.0823	Promoter (1-2kb)	12	30410559	30467358	56800	2	2310016D03Rik	NR_045491.1	-1643	NR_045491.1	2310016D03Rik	-1643	10	6	4	5	0	5	35	32	3	11	9	2	5	5	0
chr12	32208001	32209000	1000	*	1.37162e-06	0.00123015	-30.8152	Promoter (<=1kb)	12	32173129	32208498	35370	2	Pik3cg	XR_001780451.1	0	XR_001780451.1;XR_872416.1;NM_001146201.1;NM_020272.2;NM_001146200.1;XM_006515112.3;XM_006515113.3	Pik3cg;Pik3cg;Pik3cg;Pik3cg;Pik3cg;Pik3cg;Pik3cg	0;0;0;0;0;0;0	72	20	52	15	10	5	35	22	13	13	12	1	19	15	4
chr12	33303001	33304000	1000	*	0.000121049	0.0300295	-23.9161	Promoter (<=1kb)	12	33302515	33368277	65763	1	Atxn7l1	NM_001033436.3	486	XM_006515123.3;XM_006515126.3;XM_006515128.3;XM_006515125.3;XM_006515130.3;XM_006515124.3;XM_006515129.3;XM_006515134.3;XM_006515133.1;NM_001033436.3	Atxn7l1;Atxn7l1;Atxn7l1;Atxn7l1;Atxn7l1;Atxn7l1;Atxn7l1;Atxn7l1;Atxn7l1;Atxn7l1	0;0;0;0;0;0;0;0;0;0	57	38	19	38	28	10	61	54	7	15	15	0	16	15	1
chr12	48634001	48635000	1000	*	0.000152396	0.0348465	-32.9243	Promoter (1-2kb)	12	48632240	48632688	449	1	Gm29818	Gm29818	1761	Gm29818	Gm29818	1761	18	9	9	21	12	9	65	56	9	15	11	4	11	11	0
chr12	52265001	52266000	1000	*	0.000140413	0.0331163	23.4266	Promoter (<=1kb)	12	52265695	52310970	45276	1	Nubpl	XM_006516362.2	0	NM_029760.2;XM_006516363.1;XM_006516362.2	Nubpl;Nubpl;Nubpl	0;0;0	33	32	1	5	5	0	26	16	10	11	7	4	5	5	0
chr12	54657001	54658000	1000	*	0.000209071	0.0423389	-22.7176	Promoter (<=1kb)	12	54645374	54656572	11199	2	Sptssa	NM_134054.2	-429	XR_872764.2;XR_872765.1;NM_134054.2	Gm40884;Gm40884;Sptssa	-737;-737;-429	32	22	10	77	34	43	56	51	5	6	5	1	103	65	38
chr12	55396001	55397000	1000	*	2.49287e-11	1.44097e-07	-33.6714	Promoter (1-2kb)	12	55398825	55418459	19635	1	Psma6	NM_011968.3	-1825	NM_001310583.1;NM_011968.3	Psma6;Psma6	0;-1825	25	6	19	66	14	52	47	39	8	10	2	8	41	27	14
chr12	65035001	65036000	1000	*	2.5899e-10	1.11154e-06	45.0257	Promoter (<=1kb)	12	65036309	65055707	19399	1	Prpf39	XM_006516031.2	-309	XM_006516031.2;XM_006516026.3;XR_001780462.1;NM_177806.3	Prpf39;Prpf39;Prpf39;Prpf39	-309;-309;-309;-334	37	29	8	75	50	25	20	7	13	37	7	30	28	8	20
chr12	65225001	65226000	1000	*	0.000113287	0.0289107	40	Promoter (<=1kb)	12	65225517	65228454	2938	1	Wdr20rt	NM_027614.1	0	NM_027614.1	Wdr20rt	0	5	4	1	15	5	10	18	0	18	30	0	30	6	3	3
chr12	69169001	69170000	1000	*	1.41505e-09	4.94773e-06	-34.0681	Promoter (<=1kb)	12	69168814	69179010	10197	1	Lrr1	NM_001081406.1	187	XM_017315177.1;NM_001081406.1	Lrr1;Lrr1	0;0	81	3	78	64	14	50	54	26	28	33	14	19	10	5	5
chr12	69360001	69361000	1000	*	3.36198e-06	0.00245748	-47.4821	Promoter (<=1kb)	12	69361183	69361481	299	2	Rn7s2	NR_052008.1	481	NM_025441.3;XM_011244157.2;NR_052008.1	Nemf;Nemf;Rn7s2	-2825;-2826;481	31	10	21	20	7	13	5	4	1	18	15	3	15	12	3
chr12	72235001	72236000	1000	*	1.20696e-11	7.68766e-08	-22.2052	Promoter (<=1kb)	12	72211749	72235746	23998	2	Rtn1	NR_104446.1	0	NR_104446.1;NM_001007596.2;NM_001286448.1;NM_153457.7;XM_006515324.1;XM_006515323.1	Rtn1;Rtn1;Rtn1;Rtn1;Rtn1;Rtn1	0;0;0;0;0;0	79	64	15	141	67	74	67	61	6	116	97	19	118	100	18
chr12	72846001	72847000	1000	*	1.00098e-06	0.000967248	20.8443	Promoter (1-2kb)	12	72835935	72844522	8588	2	Gm40441	XR_872820.1	-1479	XR_872820.1	Gm40441	-1479	104	53	51	93	24	69	84	21	63	84	16	68	70	6	64
chr12	84971001	84972000	1000	*	0.000153248	0.0349769	-26.9681	Promoter (<=1kb)	12	84970930	84983303	12374	1	Fcf1	NM_028632.2	71	XM_006516189.3;XM_006516191.3;NM_178065.4;XR_872717.2;NM_028632.2	Arel1;Arel1;Arel1;Arel1;Fcf1	0;0;0;0;0	80	27	53	26	8	18	43	25	18	32	22	10	63	32	31
chr12	85218001	85219000	1000	*	5.24438e-07	0.000580773	-40.0017	Promoter (<=1kb)	12	85219481	85226628	7148	1	Eif2b2	NM_145445.4	-481	NM_145445.4	Eif2b2	-481	29	18	11	31	8	23	10	7	3	11	10	1	33	30	3
chr12	85471001	85472000	1000	*	2.69e-06	0.00206288	-40.7885	Promoter (1-2kb)	12	85473901	85477269	3369	1	Fos	NM_010234.2	-1901	NM_010234.2	Fos	-1901	11	10	1	15	1	14	23	22	1	26	22	4	26	23	3
chr12	86078001	86079000	1000	*	2.46514e-06	0.00193193	-22.4227	Promoter (<=1kb)	12	86056743	86079041	22299	2	Tgfb3	NM_009368.3	41	XM_006516359.2;NM_001199843.1;NM_029601.3;NM_009368.3	Ift43;Ift43;Ift43;Tgfb3	-3533;-3561;-3561;0	31	7	24	166	26	140	16	8	8	53	16	37	72	32	40
chr12	86836001	86837000	1000	*	4.25993e-05	0.0151705	25.6194	Promoter (2-3kb)	12	86831096	86833840	2745	2	Gm40491	XR_872891.2	-2161	XR_872891.2	Gm40491	-2161	21	21	0	20	0	20	98	15	83	87	10	77	41	19	22
chr12	87296001	87297000	1000	*	9.85713e-05	0.0263489	-21.9481	Promoter (2-3kb)	12	87278638	87299705	21068	2	Ism2	NM_001290302.1	2705	NM_001290302.1;XM_006516434.3;XM_011244091.2	Ism2;Ism2;Ism2	0;0;0	35	26	9	11	9	2	10	10	0	25	25	0	5	5	0
chr12	91591001	91592000	1000	*	3.48094e-07	0.000420404	-30.4895	Promoter (<=1kb)	12	91555262	91590487	35226	2	Gtf2a1	NM_175335.3	-514	XM_017315260.1;NM_031391.2;NM_175335.3	Gtf2a1;Gtf2a1;Gtf2a1	-1407;-1352;-514	43	5	38	39	20	19	16	10	6	5	2	3	36	30	6
chr12	101146001	101147000	1000	*	7.16868e-08	0.000121723	52.6472	Promoter (<=1kb)	12	101145609	101149273	3665	1	Kif4-ps	NR_033653.1	392	NR_033653.1	Kif4-ps	0	31	29	2	10	10	0	21	11	10	10	0	10	5	4	1
chr12	102470001	102471000	1000	*	4.8552e-05	0.016537	58.5628	Promoter (<=1kb)	12	102470170	102497911	27742	1	Golga5	XM_006515935.3	0	XR_381856.1;XR_381855.2;XR_872944.1;NM_001199004.1;NM_013747.4;XM_006515935.3	Gm30198;Gm30198;Gm30198;Golga5;Golga5;Golga5	22673;22587;18268;0;0;0	7	7	0	11	10	1	10	0	10	17	10	7	27	14	13
chr12	108424001	108425000	1000	*	1.92572e-06	0.00160611	-58.3752	Promoter (<=1kb)	12	108424042	108539576	115535	1	Eml1	XM_017315171.1	0	XM_017315168.1;NM_001286346.1;NM_001043336.2;NM_001286347.1;XM_017315172.1;XM_017315169.1;NM_001043335.1;XM_017315170.1;XM_017315171.1	Eml1;Eml1;Eml1;Eml1;Eml1;Eml1;Eml1;Eml1;Eml1	0;0;0;0;0;0;0;0;0	13	2	11	5	2	3	37	31	6	8	8	0	43	32	11
chr12	108554001	108555000	1000	*	3.29818e-18	5.59014e-14	27.5074	Promoter (<=1kb)	12	108554720	108688516	133797	1	Evl	NM_001163394.1	0	NM_001163394.1;NM_007965.3;NR_045751.1;NR_045752.1;NR_045753.1	Evl;Evl;Gm16596;Gm16596;Gm16596	0;0;0;0;0	192	123	69	5	0	5	30	3	27	10	0	10	28	1	27
chr12	108555001	108556000	1000	*	3.21827e-30	1.2378e-25	21.8423	Promoter (<=1kb)	12	108536402	108555618	19217	2	Gm16596	NR_045751.1	0	NM_001163394.1;NM_007965.3;NR_045751.1;NR_045752.1;NR_045753.1	Evl;Evl;Gm16596;Gm16596;Gm16596	0;0;0;0;0	347	147	200	120	5	115	73	0	73	68	1	67	143	4	139
chr12	111166001	111167000	1000	*	2.32503e-07	0.000305522	24.055	Promoter (<=1kb)	12	111166370	111267155	100786	1	Traf3	NM_001286122.1	0	NR_130987.1;NM_001286122.1;NM_011632.3;XM_006515802.2;XM_017315042.1;XM_006515798.2;XM_006515800.2;XM_006515801.2;XM_006515799.1	4930595D18Rik;Traf3;Traf3;Traf3;Traf3;Traf3;Traf3;Traf3;Traf3	0;0;0;0;0;0;0;0;0	75	64	11	142	107	35	50	24	26	192	110	82	140	89	51
chr12	111496001	111497000	1000	*	2.7379e-05	0.0111387	20.7171	Promoter (2-3kb)	12	111492424	111499453	7030	2	Gm40578	XR_001780718.1	2453	XR_001780718.1;XR_001780709.1;XR_001780710.1;XR_001780711.1;XR_001780712.1;XR_001780713.1;XR_001780714.1;XR_001780716.1;XR_873039.2;XR_873040.2;XR_873041.2;XR_001780719.1;XR_001780715.1;XR_001780717.1	Gm40578;Gm40578;Gm40578;Gm40578;Gm40578;Gm40578;Gm40578;Gm40578;Gm40578;Gm40578;Gm40578;Gm40578;Gm40578;Gm40578	0;0;0;0;0;0;0;0;0;0;0;0;0;0	61	32	29	80	41	39	74	9	65	80	25	55	56	28	28
chr12	112830001	112831000	1000	*	3.71306e-07	0.000441506	-23.7536	Promoter (<=1kb)	12	112820229	112829516	9288	2	Cdca4	XM_006516244.1	-485	XM_006516244.1;NM_028023.3	Cdca4;Cdca4	-485;-612	133	62	71	106	62	44	50	43	7	89	56	33	85	68	17
chr12	116282001	116283000	1000	*	2.22109e-07	0.000294184	-32.8686	Promoter (<=1kb)	12	116281222	116373098	91877	1	Esyt2	NM_028731.5	779	XM_017315128.1;XR_001780464.1;XR_001780465.1;XM_006516075.3;XM_006516072.3;XM_017315130.1;XR_001780466.1;XR_001780467.1;XM_011244139.2;XM_017315129.1;NM_028731.5	Esyt2;Esyt2;Esyt2;Esyt2;Esyt2;Esyt2;Esyt2;Esyt2;Esyt2;Esyt2;Esyt2	0;0;0;0;0;0;0;0;0;0;0	65	34	31	70	35	35	26	24	2	32	27	5	65	49	16
chr13	4608001	4609000	1000	*	2.00591e-06	0.00166327	-42.4638	Promoter (<=1kb)	13	4592490	4609134	16645	2	Akr1e1	XM_006516485.1	134	XM_006516485.1;NM_018859.2	Akr1e1;Akr1e1	0;0	16	0	16	27	0	27	10	1	9	23	4	19	9	9	0
chr13	8886001	8887000	1000	*	0.000234834	0.0454665	-21.688	Promoter (<=1kb)	13	8885606	8892396	6791	1	Idi1	NM_145360.2	395	NM_145360.2	Idi1	0	79	0	79	20	5	15	21	0	21	12	10	2	26	5	21
chr13	12462001	12463000	1000	*	0.00010168	0.0268852	-20.4668	Promoter (<=1kb)	13	12439415	12461738	22324	2	Lgals8	NM_018886.5	-263	NM_001291055.1;NM_001291057.1;NM_001291060.1;NM_001199043.1;NM_018886.5;XM_006516714.2;XM_006516715.2;XM_011244320.1;XM_011244321.1;XM_011244323.1;XM_011244324.1;XM_011244325.1;XM_017315547.1;XM_017315548.1;XM_017315549.1;XM_011244322.2	Lgals8;Lgals8;Lgals8;Lgals8;Lgals8;Lgals8;Lgals8;Lgals8;Lgals8;Lgals8;Lgals8;Lgals8;Lgals8;Lgals8;Lgals8;Lgals8	-2685;-263;-263;-263;-263;0;0;0;0;0;0;0;0;0;0;0	89	18	71	62	14	48	63	25	38	54	14	40	50	30	20
chr13	13592001	13593000	1000	*	5.27767e-05	0.0174913	-24.3067	Promoter (<=1kb)	13	13589603	13591868	2266	2	Gm30836	XR_873144.2	-133	XR_382086.3;XR_873144.2;XM_006516563.3;XM_006516561.1;XM_006516562.1;NM_010748.2	Gm30836;Gm30836;Lyst;Lyst;Lyst;Lyst	-133;-133;0;0;0;0	56	37	19	40	27	13	40	35	5	31	28	3	22	21	1
chr13	17992001	17993000	1000	*	0.000111371	0.0285568	-26.9188	Promoter (<=1kb)	13	17986640	17993351	6712	2	Yae1d1	NM_025904.3	351	NM_025904.3	Yae1d1	0	70	12	58	21	14	7	17	13	4	5	4	1	30	15	15
chr13	22016001	22017000	1000	*	9.45364e-05	0.0257873	-29.0073	Promoter (<=1kb)	13	22015791	22015863	73	2	n-TVaac3	rna77561	-138	rna77562;rna77561	n-TRacg1;n-TVaac3	4216;-138	23	4	19	48	21	27	56	39	17	11	1	10	14	14	0
chr13	22032001	22033000	1000	*	7.14986e-05	0.0214582	-26.832	Promoter (1-2kb)	13	22030100	22030173	74	2	n-TTagt1	rna77566	-1828	NM_175659.2;NM_175665.2;rna77565;rna77566	Hist1h2ah;Hist1h2bk;n-TIaat7;n-TTagt1	2643;-2821;2778;-1828	90	24	66	69	29	40	138	50	88	30	24	6	104	70	34
chr13	23397001	23398000	1000	*	2.28952e-07	0.000302048	-34.8773	Promoter (<=1kb)	13	23397060	23397133	74	1	n-TIaat3	rna77632	0	rna77633;rna77632;rna77634	n-TAagc12;n-TIaat3;n-TVaac2	2867;0;3145	77	25	52	112	32	80	35	22	13	15	14	1	5	2	3
chr13	23750001	23751000	1000	*	8.75541e-05	0.0244292	-22.1381	Promoter (<=1kb)	13	23751088	23751592	505	1	Hist1h2ab	NM_175660.3	-88	NM_175660.3;NM_175664.3;NM_178203.2;NM_175653.2	Hist1h2ab;Hist1h2bb;Hist1h3b;Hist1h3c	-88;3267;-1380;-4480	24	1	23	62	9	53	81	32	49	47	13	34	33	9	24
chr13	24802001	24803000	1000	*	5.95441e-05	0.0188849	-41.3968	Promoter (<=1kb)	13	24801657	24812899	11243	1	BC005537	NM_024473.3	344	NM_024473.3	BC005537	0	46	7	39	46	3	43	13	6	7	5	4	1	62	19	43
chr13	28257001	28258000	1000	*	0.000264567	0.0488582	33.2366	Promoter (<=1kb)	13	28257615	28258138	524	1	Gm11361	Gm11361	0	Gm11361	Gm11361	0	9	9	0	91	45	46	107	30	77	28	5	23	14	11	3
chr13	28883001	28884000	1000	*	1.80637e-09	6.10262e-06	-21.738	Promoter (1-2kb)	13	28460034	28885422	425389	2	2610307P16Rik	NR_045053.1	1422	NR_045053.1;NR_045054.1	2610307P16Rik;2610307P16Rik	0;0	10	7	3	67	32	35	64	62	2	21	12	9	74	65	9
chr13	28909001	28910000	1000	*	4.62817e-23	1.18671e-18	45.5399	Promoter (<=1kb)	13	28905604	28909600	3997	2	Gm34697	XR_382149.2	0	XR_382149.2;XR_873193.1	Gm34697;Gm40858	0;6770	20	13	7	139	102	37	10	1	9	119	17	102	15	7	8
chr13	38035001	38036000	1000	*	0.00027422	0.0498401	25.3157	Promoter (<=1kb)	13	38006052	38036937	30886	2	Cage1	NM_027724.2	937	NM_027724.2;XM_006516776.3;XM_006516779.3;XM_017315602.1;XM_017315603.1;XM_017315604.1;XM_017315605.1;XM_011244349.2;XR_001780816.1;NM_024242.3;XM_017315606.1;XR_001780817.1;XR_382077.2	Cage1;Cage1;Cage1;Cage1;Cage1;Cage1;Cage1;Cage1;Cage1;Riok1;Riok1;Riok1;Riok1	0;0;0;0;0;0;0;0;0;-989;-1240;-1241;-1241	29	25	4	16	13	3	5	4	1	21	6	15	12	8	4
chr13	38634001	38635000	1000	*	0.000135411	0.0323639	-25.2714	Promoter (<=1kb)	13	38602706	38635109	32404	2	Bloc1s5	NM_139063.1	109	NM_139063.1;XM_006516573.3	Bloc1s5;Bloc1s5	0;0	39	2	37	63	4	59	22	8	14	5	2	3	6	1	5
chr13	40860001	40861000	1000	*	1.39668e-06	0.00124927	-26.5208	Promoter (<=1kb)	13	40859768	40960892	101125	1	Gcnt2	NM_023887.4	233	NM_023887.4;NR_039585.1;NA	Gcnt2;Mir5124a;Mir5124a	0;-4791;-4801	46	24	22	63	52	11	64	58	6	43	42	1	15	14	1
chr13	41221001	41222000	1000	*	4.18216e-05	0.014967	47.9677	Promoter (<=1kb)	13	41182382	41220403	38022	2	Elovl2	NM_019423.2	-598	NM_001311121.1;NM_019423.2	Elovl2;Elovl2	-839;-598	5	5	0	20	13	7	43	9	34	25	4	21	12	8	4
chr13	41848001	41849000	1000	*	1.17462e-05	0.00608294	48.2178	Promoter (<=1kb)	13	41763148	41847616	84469	2	Adtrp	NM_001145875.1	-385	NM_175417.4;NM_001145875.1	Adtrp;Adtrp	-513;-385	6	6	0	66	42	24	12	8	4	26	4	22	16	3	13
chr13	42184001	42185000	1000	*	9.7599e-11	4.80783e-07	-62.4209	Promoter (1-2kb)	13	42186725	42195210	8486	1	Gm32778	XR_001780923.1	-1725	XR_001780923.1;XR_382263.2;XM_006516839.3;NM_007772.2;XM_017315359.1;XM_006516840.3;XM_017315358.1;XM_006516838.3;XM_017315360.1	Gm32778;Gm32778;Hivep1;Hivep1;Hivep1;Hivep1;Hivep1;Hivep1;Hivep1	-1725;-1725;0;0;0;0;0;0;0	24	8	16	25	7	18	7	6	1	5	5	0	31	29	2
chr13	42867001	42868000	1000	*	2.89881e-07	0.000364172	-46.701	Promoter (<=1kb)	13	42866726	43138390	271665	1	Phactr1	XM_006516911.3	275	XM_011244395.2;NM_001302635.1;XM_017315482.1;XM_006516905.3;XM_017315483.1;XM_006516906.3;NM_001005740.1;NM_001302636.1;XM_006516911.3	Phactr1;Phactr1;Phactr1;Phactr1;Phactr1;Phactr1;Phactr1;Phactr1;Phactr1	0;0;0;0;0;0;0;0;0	36	19	17	53	10	43	7	7	0	11	9	2	73	48	25
chr13	44216001	44217000	1000	*	3.81766e-07	0.000450195	-42.1027	Promoter (<=1kb)	13	44193589	44216487	22899	2	A330076C08Rik	NR_045088.1	0	NR_045088.1	A330076C08Rik	0	20	9	11	27	13	14	50	44	6	12	11	1	22	19	3
chr13	46931001	46932000	1000	*	4.21468e-05	0.0150471	-34.897	Promoter (<=1kb)	13	46749087	46931298	182212	2	Kif13a	XM_017315400.1	0	XM_011244377.2;NM_010617.2;XM_017315400.1;XM_006516864.3;XM_006516862.3;XM_011244376.2;XM_011244374.2;XM_011244375.2;XM_006516861.3	Kif13a;Kif13a;Kif13a;Kif13a;Kif13a;Kif13a;Kif13a;Kif13a;Kif13a	0;0;0;0;0;0;0;0;0	15	0	15	28	2	26	37	2	35	10	4	6	30	21	9
chr13	47667001	47668000	1000	*	0.000114315	0.0290024	-42.8628	Promoter (<=1kb)	13	47667505	47668393	889	1	4930471G24Rik	XR_382319.1	0	XR_382319.1	4930471G24Rik	0	38	6	32	36	8	28	11	3	8	12	9	3	6	5	1
chr13	48260001	48261000	1000	*	8.37497e-07	0.000844251	24.7236	Promoter (<=1kb)	13	48261427	48264036	2610	1	Id4	NM_031166.2	-427	NR_102303.1;NM_031166.2	A330033J07Rik;Id4	0;-427	46	22	24	103	33	70	71	8	63	78	6	72	60	16	44
chr13	48968001	48969000	1000	*	5.51409e-08	9.97123e-05	26.6464	Promoter (<=1kb)	13	48968112	48969905	1794	1	Fam120aos	NR_015601.1	0	NM_001033268.2;XR_001780775.1;XR_001780774.1;XR_001780776.1;NR_015601.1	Fam120a;Fam120a;Fam120a;Fam120a;Fam120aos	-173;-124;-124;-124;0	385	230	155	87	22	65	39	1	38	26	0	26	131	59	72
chr13	51418001	51419000	1000	*	1.00663e-06	0.000970716	-32.6302	Promoter (<=1kb)	13	51378153	51418686	40534	2	Gm32834	XR_873398.1	0	XR_873398.1;XR_873397.2;NM_010101.4	Gm32834;Gm32834;S1pr3	0;0;0	108	12	96	54	1	53	51	10	41	20	15	5	22	5	17
chr13	52584001	52585000	1000	*	0.000110325	0.0283892	38.2355	Promoter (<=1kb)	13	52583437	52648792	65356	1	Syk	NM_001198977.1	564	XM_006516895.3;XM_006516897.3;NM_001198977.1	Syk;Syk;Syk	0;0;0	106	34	72	10	6	4	41	1	40	6	0	6	62	13	49
chr13	53639001	53640000	1000	*	0.000112521	0.0287852	24.0218	Promoter (<=1kb)	13	53635892	53639201	3310	2	9530014B07Rik	NR_131079.1	0	NR_131079.1	9530014B07Rik	0	57	56	1	10	9	1	11	7	4	10	8	2	12	8	4
chr13	53933001	53934000	1000	*	0.000116079	0.0292686	-31.6954	Promoter (1-2kb)	13	53932983	53935283	2301	2	Gm34557	XR_382407.2	1283	XR_382407.2;XR_873428.1	Gm34557;Gm34557	0;0	5	4	1	29	14	15	10	10	0	5	5	0	16	14	2
chr13	55595001	55596000	1000	*	0.000227955	0.0446212	36.9524	Promoter (1-2kb)	13	55593135	55597697	4563	1	Tmed9	NM_026211.3	1866	NM_001311137.1;NM_146045.2;NM_026211.3	B4galt7;B4galt7;Tmed9	-3896;-3896;0	20	20	0	11	11	0	25	23	2	7	4	3	10	4	6
chr13	55726001	55727000	1000	*	3.46685e-07	0.000419207	21.5103	Promoter (<=1kb)	13	55727116	55740580	13465	1	Pcbd2	XM_006517399.3	-116	XM_006517399.3;XM_006517401.3;XM_011244564.2;XM_006517398.2;NM_028281.1;NM_175150.3	Pcbd2;Pcbd2;Pcbd2;Pcbd2;Pcbd2;Txndc15	-116;-136;0;0;0;0	22	1	21	47	22	25	32	0	32	32	4	28	32	0	32
chr13	58156001	58157000	1000	*	1.33819e-06	0.00120994	-40.6527	Promoter (<=1kb)	13	58157649	58164693	7045	1	Idnk	NM_001048060.2	-649	NM_001048060.2;NM_198004.3	Idnk;Idnk	-649;-649	40	20	20	37	22	15	7	7	0	21	20	1	11	10	1
chr13	61632001	61633000	1000	*	8.93e-05	0.0247855	29.3709	Promoter (1-2kb)	13	61630023	61636282	6260	1	LOC108168055	XM_017315660.1	1978	XM_017315660.1	LOC108168055	0	32	19	13	57	43	14	17	4	13	39	19	20	43	18	25
chr13	64344001	64345000	1000	*	5.68852e-05	0.0183146	-34.8173	Promoter (<=1kb)	13	64316550	64343787	27238	2	Gm31128	XR_382570.2	-214	XR_382570.2	Gm31128	-214	40	1	39	34	19	15	6	4	2	19	10	9	22	16	6
chr13	67553001	67554000	1000	*	5.66019e-06	0.00357966	31.1246	Promoter (<=1kb)	13	67553202	67570892	17691	1	9430065F17Rik	NR_131100.1	0	NR_131100.1;NR_131098.1;NR_131099.1;NM_001035231.3	9430065F17Rik;9430065F17Rik;9430065F17Rik;Zfp748	0;0;0;0	26	11	15	29	15	14	65	7	58	42	5	37	52	13	39
chr13	80887001	80888000	1000	*	0.000131941	0.0317868	-25.8837	Promoter (<=1kb)	13	80886789	80896042	9254	1	Arrdc3	XM_006517017.3	212	XR_382418.1;NM_001042591.1;XM_006517017.3	Arrdc3;Arrdc3;Arrdc3	0;0;0	45	24	21	49	19	30	22	17	5	48	34	14	96	65	31
chr13	84905001	84906000	1000	*	0.000205743	0.0420431	-37.5713	Promoter (<=1kb)	13	84573766	84906167	332402	2	Gm34196	XR_382705.1	167	XR_382705.1;XR_873709.1;XR_001781014.1;XR_873708.1;XR_873710.1	Gm34196;Gm34196;Gm34196;Gm34196;Gm34196	0;0;0;0;0	53	31	22	58	20	38	5	5	0	23	12	11	20	20	0
chr13	93097001	93098000	1000	*	7.72163e-07	0.000796866	25.0817	Promoter (2-3kb)	13	93094833	93098968	4136	1	A630019I02Rik	NR_046182.1	2168	NR_046182.1;NM_023821.3	A630019I02Rik;Cmya5	0;0	16	2	14	47	21	26	38	3	35	5	0	5	38	1	37
chr13	95479001	95480000	1000	*	9.08962e-08	0.000145202	21.4123	Promoter (<=1kb)	13	95477301	95478655	1355	2	S100z	NM_001081159.1	-346	NM_001081159.1	S100z	-346	64	48	16	66	54	12	45	25	20	20	17	3	69	21	48
chr13	96377001	96378000	1000	*	1.5541e-06	0.00135611	-55.2995	Promoter (<=1kb)	13	96376867	96377703	837	1	Gm8712	Gm8712	134	Gm8712	Gm8712	0	31	10	21	28	16	12	5	5	0	6	6	0	6	6	0
chr13	97035001	97036000	1000	*	0.000121513	0.0301034	-45.9905	Promoter (<=1kb)	13	97021864	97035254	13391	2	1700029F12Rik	NR_104276.1	0	NM_001080777.2;NM_001284205.1;NM_025585.3;NR_104276.1;XM_011244689.2;XR_873824.1	1700029F12Rik;1700029F12Rik;1700029F12Rik;1700029F12Rik;1700029F12Rik;Gm41028	-639;-639;-639;0;-611;0	17	10	7	5	2	3	29	25	4	24	24	0	5	5	0
chr13	98694001	98695000	1000	*	4.97227e-05	0.0167473	-27.8959	Promoter (<=1kb)	13	98686238	98694831	8594	2	Tmem171	NM_001025606.1	0	XM_006517709.3;XM_011244676.1;XM_011244677.2;NM_001025606.1;XM_011244678.1	Tmem171;Tmem171;Tmem171;Tmem171;Tmem171	0;0;0;0;0	58	21	37	131	31	100	64	29	35	10	6	4	22	15	7
chr13	100771001	100772000	1000	*	0.000273943	0.0498347	24.7255	Promoter (<=1kb)	13	100759700	100771703	12004	2	Cenph	XM_011244667.2	0	NM_021886.1;XM_011244667.2;XM_006517676.3;XM_006517678.3	Cenph;Cenph;Cenph;Cenph	0;0;0;0	6	6	0	23	22	1	46	27	19	11	10	1	33	23	10
chr13	107208001	107209000	1000	*	2.10819e-17	3.34634e-13	-50.2273	Promoter (1-2kb)	13	107210533	107212526	1994	1	Gm31715	XR_382872.2	-1533	XR_382872.2	Gm31715	-1533	66	19	47	120	38	82	40	30	10	22	19	3	55	44	11
chr13	111800001	111801000	1000	*	1.79148e-05	0.00826708	28.7512	Promoter (<=1kb)	13	111748740	111799549	50810	2	Map3k1	XM_017315517.1	-452	NM_011945.2;XM_017315517.1;XM_017315516.1	Map3k1;Map3k1;Map3k1	0;0;0	24	24	0	10	10	0	24	14	10	26	25	1	27	16	11
chr13	112651001	112652000	1000	*	2.87177e-05	0.0115239	-22.6632	Promoter (<=1kb)	13	112598696	112652269	53574	2	Ddx4	XM_011244619.2	269	NM_001145885.1;NM_010029.2;XM_011244618.2;XM_011244619.2;XM_011244621.2;XM_006517524.3;XM_011244622.2	Ddx4;Ddx4;Ddx4;Ddx4;Ddx4;Ddx4;Ddx4	0;0;0;0;0;0;0	118	41	77	64	34	30	43	24	19	13	10	3	85	57	28
chr13	112663001	112664000	1000	*	8.4858e-06	0.00480576	46.4425	Promoter (2-3kb)	13	112660766	112738752	77987	1	Slc38a9	NM_178746.4	2235	XM_006517670.2;XM_017315519.1;XR_001780783.1;XR_382737.3;XR_873762.2;XR_873763.2;XR_873764.2;XM_006517671.3;XM_006517673.3;NM_178746.4	Slc38a9;Slc38a9;Slc38a9;Slc38a9;Slc38a9;Slc38a9;Slc38a9;Slc38a9;Slc38a9;Slc38a9	0;0;0;0;0;0;0;0;0;0	10	10	0	16	16	0	19	11	8	8	2	6	18	14	4
chr13	113036001	113037000	1000	*	1.1364e-06	0.00107106	-44.9132	Promoter (<=1kb)	13	113036008	113036028	21	1	Mir449c	NA	0	XR_873755.1;XM_011244659.1;XM_011244661.1;XM_011244662.1;XM_011244660.1;XM_006517653.2;XM_006517655.2;NM_001281487.1;NR_029961.1;NA;NA;NR_030602.1;NA;NR_030452.1;NA;NA	Cdc20b;Cdc20b;Cdc20b;Cdc20b;Cdc20b;Cdc20b;Cdc20b;Cdc20b;Mir449a;Mir449a;Mir449a;Mir449b;Mir449b;Mir449c;Mir449c;Mir449c	0;0;0;0;0;0;0;0;-534;-549;-589;-419;-429;0;0;0	35	6	29	46	11	35	32	14	18	16	15	1	17	10	7
chr14	7996001	7997000	1000	*	4.00477e-06	0.00280446	-32.5614	Promoter (1-2kb)	14	7965187	7994765	29579	2	Dnase1l3	XM_006517921.3	-1236	NM_007870.3;XM_006517921.3;XR_383076.3	Dnase1l3;Dnase1l3;Gm30244	-1819;-1236;0	25	21	4	38	13	25	20	15	5	17	17	0	18	18	0
chr14	11162001	11163000	1000	*	1.27628e-07	0.000189641	-38.4567	Promoter (<=1kb)	14	9550092	11162013	1611922	2	Fhit	XM_017315847.1	0	XM_017315847.1;XM_011244732.2;NM_001308285.1;NM_010210.3	Fhit;Fhit;Fhit;Fhit	0;0;0;0	91	2	89	50	1	49	5	5	0	5	0	5	60	13	47
chr14	13917001	13918000	1000	*	3.08634e-05	0.0121462	28.0994	Promoter (2-3kb)	14	13828428	13914521	86094	2	Gm281	XM_011244864.1	-2480	XM_011244864.1	Gm281	-2480	39	16	23	87	29	58	12	0	12	31	5	26	45	5	40
chr14	26969001	26970000	1000	*	2.60448e-08	5.62523e-05	-55.5291	Promoter (<=1kb)	14	26966234	26968808	2575	2	Gm41114	XR_874477.1	-193	XM_017316214.1;XM_006519608.1;XR_001781159.1;NM_145221.2;XR_001781158.1;XR_001781160.1;XR_874477.1	Appl1;Appl1;Appl1;Appl1;Appl1;Appl1;Gm41114	0;0;0;0;0;0;-193	49	14	35	19	0	19	36	25	11	5	3	2	10	8	2
chr14	27000001	27001000	1000	*	2.83467e-09	9.02761e-06	-29.4343	Promoter (<=1kb)	14	27000362	27002326	1965	1	Hesx1	NM_010420.2	0	XM_006518570.3;NM_010420.2	Hesx1;Hesx1	0;0	26	8	18	100	17	83	42	32	10	22	9	13	7	3	4
chr14	27428001	27429000	1000	*	1.64582e-05	0.0078001	38.256	Promoter (<=1kb)	14	27428840	27481060	52221	1	Fam208a	XR_383159.3	0	XR_383159.3;XR_383158.3;XM_006518820.3;XM_017315961.1;NM_001114879.1;NM_028945.1	Fam208a;Fam208a;Fam208a;Fam208a;Fam208a;Fam208a	0;0;0;0;0;0	16	7	9	5	4	1	5	3	2	35	1	34	50	4	46
chr14	30353001	30354000	1000	*	9.68827e-10	3.54882e-06	-28.1486	Promoter (<=1kb)	14	30039941	30353486	313546	2	Cacna1d	NM_001083616.2	0	XM_017315818.1;NM_001083616.2;NM_001302637.1;XM_006518475.1;XM_006518479.1;XM_006518480.1;XM_017315808.1;XM_017315809.1;XM_017315810.1;XM_017315811.1;XM_017315812.1;XM_017315813.1;XM_017315814.1;XM_017315815.1;XM_017315816.1;XM_017315817.1;XM_017315819.1;XM_017315823.1;XM_017315824.1;XM_017315825.1;XR_001781092.1;NM_028981.3;XM_017315822.1;XM_017315820.1;XM_017315821.1	Cacna1d;Cacna1d;Cacna1d;Cacna1d;Cacna1d;Cacna1d;Cacna1d;Cacna1d;Cacna1d;Cacna1d;Cacna1d;Cacna1d;Cacna1d;Cacna1d;Cacna1d;Cacna1d;Cacna1d;Cacna1d;Cacna1d;Cacna1d;Cacna1d;Cacna1d;Cacna1d;Cacna1d;Cacna1d	-123;0;0;0;0;0;0;0;0;0;0;0;0;0;0;0;0;0;0;0;0;0;0;0;0	114	38	76	41	0	41	128	42	86	268	123	145	610	340	270
chr14	30653001	30654000	1000	*	1.70553e-05	0.00800326	23.3602	Promoter (<=1kb)	14	30654340	30690650	36311	1	Rft1	XR_001781128.1	-340	XR_001781128.1;XR_383188.2;XR_383189.2;NM_177815.3	Rft1;Rft1;Rft1;Rft1	-340;-340;-340;-375	31	25	6	56	46	10	10	9	1	28	10	18	31	15	16
chr14	30717001	30718000	1000	*	1.58645e-07	0.000223759	-27.1332	Promoter (<=1kb)	14	30716120	30822713	106594	1	Sfmbt1	XM_006519288.3	881	XM_006519289.3;XM_011245121.2;NM_019460.2;NM_001166531.1;XM_011245120.2;NM_001166532.1;XM_006519287.3;XM_006519288.3	Sfmbt1;Sfmbt1;Sfmbt1;Sfmbt1;Sfmbt1;Sfmbt1;Sfmbt1;Sfmbt1	0;0;0;0;0;0;0;0	8	0	8	45	2	43	56	22	34	11	0	11	41	20	21
chr14	31323001	31324000	1000	*	5.93817e-05	0.0188513	28.4848	Promoter (<=1kb)	14	31260375	31323896	63522	2	Dnah1	NM_001033668.1	0	XM_017315798.1;NM_001033668.1;XM_017315799.1;XM_006518426.3;XM_006518427.3;XR_001781209.1;XR_874493.1;XR_383327.1	Dnah1;Dnah1;Dnah1;Dnah1;Dnah1;Gm35823;Gm35823;Gm35823	-2078;0;0;0;0;55132;55132;54084	15	13	2	31	31	0	5	5	0	11	6	5	10	4	6
chr14	32514001	32515000	1000	*	3.59469e-06	0.00258038	-33.236	Promoter (<=1kb)	14	32513521	32580989	67469	1	Ercc6	NM_001081221.1	480	XM_006519121.3;XR_383187.3;XM_006519120.3;XM_006519123.3;NM_001081221.1;XM_006519122.2;XM_006519124.3	Ercc6;Ercc6;Ercc6;Ercc6;Ercc6;Ercc6;Ercc6	0;0;0;0;0;-2291;-3970	32	3	29	44	10	34	34	19	15	30	14	16	64	29	35
chr14	32995001	32996000	1000	*	1.0994e-05	0.00580773	-42.9993	Promoter (2-3kb)	14	32992395	33015300	22906	1	Lrrc18	XM_006519457.3	2606	NM_001146021.1;NM_026253.4;XM_006519458.3;XM_006519457.3;NM_001146022.2;XM_006519279.3;XM_006519277.3;XM_006519278.3;XM_011245118.2;XM_011245119.2	Lrrc18;Lrrc18;Lrrc18;Lrrc18;Wdfy4;Wdfy4;Wdfy4;Wdfy4;Wdfy4;Wdfy4	0;0;0;0;0;0;0;0;0;0	41	3	38	23	4	19	11	8	3	6	2	4	5	3	2
chr14	37113001	37114000	1000	*	5.03083e-05	0.0168763	34.9473	Promoter (2-3kb)	14	37102140	37110101	7962	2	2610528A11Rik	NM_001206684.1	-2900	NM_001206684.1	2610528A11Rik	-2900	5	5	0	23	22	1	11	7	4	12	9	3	32	16	16
chr14	45315001	45316000	1000	*	8.66078e-05	0.0242531	20.6763	Promoter (2-3kb)	14	45283087	45318572	35486	2	Ero1l	NM_015774.3	2572	NM_015774.3	Ero1l	0	46	41	5	22	22	0	45	28	17	10	9	1	36	25	11
chr14	46821001	46822000	1000	*	1.02642e-05	0.0055273	47.7343	Promoter (<=1kb)	14	46808149	46822242	14094	2	Gmfb	NM_022023.2	242	NM_022023.2	Gmfb	0	35	5	30	6	5	1	21	0	21	31	1	30	41	0	41
chr14	48869001	48870000	1000	*	2.84948e-05	0.0114678	35.8374	Promoter (<=1kb)	14	48870315	48873349	3035	1	LOC108168160	XR_001781256.1	-315	XR_001781254.1;XR_001781253.1;XR_874608.1;XR_001781255.1;XR_383415.2;XR_874607.1;XR_874609.1;XR_874610.1;XR_001781256.1	Gm41149;Gm41149;LOC102639645;LOC102639645;LOC102639645;LOC102639645;LOC102639645;LOC102639645;LOC108168160	13535;10525;0;0;0;0;0;0;-315	42	32	10	17	14	3	24	8	16	18	6	12	11	7	4
chr14	50808001	50809000	1000	*	4.79301e-05	0.0164201	-33.7967	Promoter (<=1kb)	14	50807946	50821300	13355	1	Parp2	NM_009632.2	55	XM_006518442.3;NM_009632.2;NR_002142.2	Parp2;Parp2;Rpph1	0;0;-230	15	5	10	27	0	27	41	10	31	20	7	13	25	23	2
chr14	52259001	52260000	1000	*	2.58858e-07	0.000331444	20.8627	Promoter (1-2kb)	14	52198151	52257807	59657	2	Chd8	XM_017316172.1	-1194	XM_011245165.2;XM_017316172.1;XM_006519476.3;NM_172601.3	Chd8;Chd8;Chd8;Rab2b	-1195;-1194;-1195;19395	56	54	2	73	72	1	24	12	12	12	12	0	10	8	2
chr14	52304001	52305000	1000	*	3.0742e-05	0.0121175	-58.8889	Promoter (<=1kb)	14	52294841	52305081	10241	2	Mettl3	XM_017316096.1	81	XM_017316096.1;XM_006519311.3;NM_019721.2;XR_001781135.1;XR_001781134.1	Mettl3;Mettl3;Mettl3;Mettl3;Mettl3	0;0;0;0;0	36	8	28	12	0	12	30	15	15	6	6	0	5	3	2
chr14	52429001	52430000	1000	*	1.44448e-06	0.00127943	-34.2384	Promoter (1-2kb)	14	52427967	52428876	910	1	Trav1	Trav1	1034	Trav1	Trav1	1034	57	14	43	32	12	20	46	26	20	28	19	9	28	20	8
chr14	54255001	54256000	1000	*	6.44252e-05	0.0199644	-30.3077	Promoter (<=1kb)	14	54254129	54269169	15041	1	Abhd4	NM_001205181.1	872	NM_001205181.1;XR_383129.2;NM_134076.2;XM_006518367.2;NM_001113358.1;NM_010015.4	Abhd4;Abhd4;Abhd4;Abhd4;Dad1;Dad1	0;-3207;-3232;-3345;-1072;-1072	19	10	9	46	20	26	21	21	0	6	4	2	19	13	6
chr14	54430001	54431000	1000	*	7.55419e-05	0.0222086	24.8422	Promoter (<=1kb)	14	54431598	54442456	10859	1	Mmp14	NM_008608.4	-598	NM_008608.4;NM_026851.2	Mmp14;Mrpl52	-598;3092	51	19	32	28	9	19	30	2	28	31	4	27	20	2	18
chr14	55470001	55471000	1000	*	0.000175391	0.0380705	39.7101	Promoter (1-2kb)	14	55466366	55468537	2172	2	Gm41158	XR_874641.1	-1464	XR_874641.1	Gm41158	-1464	26	18	8	16	11	5	44	15	29	16	7	9	10	1	9
chr14	57397001	57398000	1000	*	3.4144e-05	0.0130221	-27.8859	Promoter (<=1kb)	14	57275034	57398483	123450	2	Cryl1	NM_030004.3	483	NM_030004.3	Cryl1	0	40	13	27	23	20	3	32	28	4	16	16	0	73	55	18
chr14	57525001	57526000	1000	*	8.53671e-17	1.21953e-12	25.4273	Promoter (<=1kb)	14	57524829	57543166	18338	1	Il17d	NM_145837.3	172	NM_145837.3	Il17d	0	481	297	184	172	102	70	101	27	74	45	24	21	111	28	83
chr14	59439001	59440000	1000	*	0.000253288	0.0475569	-32.5138	Promoter (<=1kb)	14	59402009	59440880	38872	2	Setdb2	NM_001320720.1	880	XM_017316176.1;XM_017316177.1;XM_006519494.2;NM_026908.3;NM_001320720.1;NM_001320721.1;NR_135463.1;NM_001320725.1	Cab39l;Cab39l;Cab39l;Cab39l;Setdb2;Setdb2;Setdb2;Setdb2-phf11c	-955;-955;-964;-981;0;0;0;0	26	6	20	17	16	1	15	11	4	13	13	0	7	7	0
chr14	60252001	60253000	1000	*	0.000156776	0.0355099	21.3236	Promoter (<=1kb)	14	60251493	60263907	12415	1	Gm38641	XR_874662.2	508	XR_874661.1;XR_874660.2;XR_874662.2;NM_170591.1	Gm38641;Gm38641;Gm38641;Nupl1	0;0;0;-623	31	5	26	10	4	6	66	1	65	49	1	48	6	1	5
chr14	60735001	60736000	1000	*	1.01936e-06	0.000981769	-33.5623	Promoter (2-3kb)	14	60732904	60764556	31653	1	Spata13	NM_001310594.1	2097	XM_011245026.1;NM_001033272.2;XM_017315973.1;XM_011245025.1;XM_011245027.1;XM_006518870.2;XM_017315975.1;NM_001310594.1	Spata13;Spata13;Spata13;Spata13;Spata13;Spata13;Spata13;Spata13	0;0;0;0;0;0;0;0	10	7	3	44	20	24	83	65	18	7	7	0	45	43	2
chr14	65834001	65835000	1000	*	1.32257e-05	0.00658978	67.9784	Promoter (<=1kb)	14	65819027	65833969	14943	2	Esco2	NM_028039.2	-32	NM_145944.4;NM_028039.2	Ccdc25;Esco2	-2302;-32	12	8	4	6	6	0	32	10	22	5	0	5	27	4	23
chr14	67714001	67715000	1000	*	5.63145e-07	0.000614787	26.2795	Promoter (<=1kb)	14	67676354	67715610	39257	2	Cdca2	NM_001110162.1	610	XM_006518420.3;XM_011244912.2;XM_011244913.2;NM_001110162.1;NM_175384.4;XM_011244915.2;XM_006518342.2;XM_006518343.2;NM_001111028.1;NM_001285933.1;NM_134073.2;XR_383124.3;XR_001781078.1	Cdca2;Cdca2;Cdca2;Cdca2;Cdca2;Cdca2;Kctd9;Kctd9;Kctd9;Kctd9;Kctd9;Kctd9;Kctd9	0;0;0;0;0;0;0;0;0;0;0;0;0	85	75	10	41	27	14	48	22	26	25	12	13	65	38	27
chr14	67717001	67718000	1000	*	1.88107e-06	0.00157411	-37.9379	Promoter (<=1kb)	14	67716199	67742309	26111	1	Kctd9	XR_001781078.1	802	XM_006518420.3;XM_011244912.2;XM_011244913.2;NM_001110162.1;NM_175384.4;XM_011244915.2;XM_006518342.2;XM_006518343.2;NM_001111028.1;NM_001285933.1;NM_134073.2;XR_383124.3;XR_001781078.1	Cdca2;Cdca2;Cdca2;Cdca2;Cdca2;Cdca2;Kctd9;Kctd9;Kctd9;Kctd9;Kctd9;Kctd9;Kctd9	0;0;0;0;0;0;0;0;0;0;0;0;0	11	5	6	67	30	37	35	31	4	34	24	10	10	9	1
chr14	73524001	73525000	1000	*	1.60643e-08	3.77566e-05	-44.0152	Promoter (<=1kb)	14	73525319	73530442	5124	1	Gm41209	XR_874819.1	-319	XR_874819.1;XM_017315941.1;NM_172527.2	Gm41209;Nudt15;Nudt15	0;0;0	5	2	3	72	6	66	12	6	6	8	8	0	11	6	5
chr14	73525001	73526000	1000	*	9.69447e-05	0.0261646	-25.2155	Promoter (<=1kb)	14	73525319	73530442	5124	1	Gm41209	XR_874819.1	0	XR_874819.1;XM_017315941.1;NM_172527.2	Gm41209;Nudt15;Nudt15	0;0;0	63	4	59	22	0	22	121	22	99	28	18	10	37	1	36
chr14	75136001	75137000	1000	*	2.60141e-05	0.0107452	29.1385	Promoter (<=1kb)	14	75136425	75230842	94418	1	Lcp1	NM_008879.4	0	XR_383590.2;XM_006518704.1;NM_001247984.1;XM_006518701.3;XM_006518702.3;NM_008879.4;XM_006518703.3	Gm15628;Lcp1;Lcp1;Lcp1;Lcp1;Lcp1;Lcp1	0;0;0;0;0;0;0	29	24	5	114	31	83	19	13	6	11	1	10	68	0	68
chr14	76111001	76112000	1000	*	5.0917e-06	0.00330629	25.9385	Promoter (<=1kb)	14	76110891	76137379	26489	1	Nufip1	NM_013745.5	110	NM_026177.3;NM_013745.5;XM_006519072.1	Gpalpp1;Nufip1;Nufip1	-186;0;-2978	36	22	14	28	15	13	63	25	38	80	5	75	29	14	15
chr14	103520001	103521000	1000	*	4.14234e-05	0.0148951	-25.2913	Promoter (<=1kb)	14	103519987	103613346	93360	1	Scel	XM_006519355.3	14	XM_006519356.3;NM_022886.2;XM_006519355.3	Scel;Scel;Scel	0;0;0	32	14	18	23	21	2	41	39	2	17	17	0	42	35	7
chr14	103721001	103722000	1000	*	0.000179468	0.0386203	-24.6169	Promoter (1-2kb)	14	103719026	103867713	148688	1	Gm35197	XR_383715.2	1975	XR_383715.2	Gm35197	0	71	33	38	44	25	19	40	29	11	30	18	12	27	26	1
chr14	105682001	105683000	1000	*	5.27187e-06	0.00339529	31.4364	Promoter (<=1kb)	14	105681826	105682219	394	1	Gm10076	Gm10076	175	Gm10076;XR_383731.3;XR_874933.2;XR_874934.2	Gm10076;Gm35967;Gm35967;Gm35967	0;14704;14704;45364	20	18	2	17	13	4	36	22	14	57	0	57	35	33	2
chr14	118050001	118051000	1000	*	9.15377e-07	0.000905417	28.3088	Promoter (1-2kb)	14	118012790	118052246	39457	2	Dct	NM_010024.3	1246	NM_010024.3	Dct	0	11	5	6	46	41	5	30	12	18	38	5	33	58	37	21
chr14	118182001	118183000	1000	*	2.31605e-05	0.00988473	-26.4344	Promoter (<=1kb)	14	118181507	118182129	623	2	Gm4674	Gm4674	0	Gm4674	Gm4674	0	11	8	3	42	27	15	47	43	4	21	21	0	15	14	1
chr14	118256001	118257000	1000	*	0.00016978	0.0373011	-29.1426	Promoter (1-2kb)	14	118258634	118258736	103	1	Mir6241	NR_105749.1	-1634	NR_131969.1;NR_105749.1;NA	LOC105245869;Mir6241;Mir6241	0;-1634;-1659	42	31	11	11	6	5	28	28	0	27	24	3	56	51	5
chr14	119752001	119753000	1000	*	2.87806e-06	0.00218864	-27.1006	Promoter (2-3kb)	14	119749227	119751564	2338	1	1700006F04Rik	NR_045621.1	2774	NR_045621.1;NM_015820.3	1700006F04Rik;Hs6st3	2774;0	40	27	13	39	22	17	23	20	3	19	16	3	50	48	2
chr14	122466001	122467000	1000	*	4.95519e-07	0.000553035	-36.1538	Promoter (<=1kb)	14	122459160	122465658	6499	2	Zic5	NM_022987.3	-343	NR_045046.1;XR_383797.2;XR_001781476.1;NM_022987.3;XM_006519357.3	2610035F20Rik;Gm33719;Gm33719;Zic5;Zic5	8199;0;0;-343;-535	29	0	29	20	2	18	26	10	16	26	13	13	20	7	13
chr15	8451001	8452000	1000	*	0.000153804	0.0350537	-20.4901	Promoter (1-2kb)	15	8290306	8453917	163612	2	Nipbl	XM_017316745.1	1917	XM_017316745.1;XM_006519994.3;XM_006519995.2	Nipbl;Nipbl;Nipbl	0;0;0	63	30	33	47	17	30	45	34	11	22	9	13	58	41	17
chr15	10469001	10470000	1000	*	3.10013e-07	0.000385588	-32.1032	Promoter (<=1kb)	15	10446763	10470516	23754	2	Dnajc21	NM_030046.2	516	NM_026396.3;NM_030046.2;XM_017316801.1	Brix1;Dnajc21;Dnajc21	15937;0;0	80	8	72	21	9	12	42	16	26	40	23	17	10	8	2
chr15	16276001	16277000	1000	*	0.000213191	0.0428501	-23.7274	Promoter (<=1kb)	15	16275950	16276023	74	2	n-TNgtt2	rna86043	0	rna86043	n-TNgtt2	0	57	28	29	68	50	18	55	36	19	24	24	0	68	61	7
chr15	21240001	21241000	1000	*	2.24723e-07	0.00029686	-46.3878	Promoter (2-3kb)	15	21237822	21598421	360600	1	Cdh12	XM_017316547.1	2179	XM_011245341.2;XM_011245342.2;XM_011245344.2;XM_011245345.2;XM_017316546.1;XM_011245343.2;XM_017316545.1;XM_011245347.2;NM_001008420.2;XM_017316547.1	Cdh12;Cdh12;Cdh12;Cdh12;Cdh12;Cdh12;Cdh12;Cdh12;Cdh12;Cdh12	0;0;0;0;0;0;0;0;0;0	40	12	28	48	6	42	65	42	23	5	5	0	47	18	29
chr15	25018001	25019000	1000	*	1.45461e-05	0.00710607	-32.6872	Promoter (<=1kb)	15	24989286	25018491	29206	2	Gm2824	XR_001781656.1	0	XR_001781655.1;XR_001781656.1;XR_875062.1;XR_001781651.1;XR_001781652.1;XR_001781653.1;XR_001781654.1;XR_875061.2;XR_875063.2;XR_875058.2	Gm2824;Gm2824;Gm2824;Gm2824;Gm2824;Gm2824;Gm2824;Gm2824;Gm2824;Gm2824	0;0;0;0;0;0;0;0;0;0	34	16	18	33	22	11	23	17	6	10	10	0	38	36	2
chr15	35325001	35326000	1000	*	9.17889e-15	1.03134e-10	-65.1879	Promoter (2-3kb)	15	35307010	35328535	21526	2	BC048602	NR_045280.1	2535	NR_045280.1;XR_383923.3;XR_383924.3	BC048602;Gm33584;Gm33584	0;-2990;-2993	83	27	56	5	0	5	39	37	2	15	8	7	26	25	1
chr15	35664001	35665000	1000	*	8.67413e-06	0.00489211	-20.8242	Promoter (2-3kb)	15	35660970	35661047	78	2	Mir875	NR_030606.1	-2954	NR_035527.1;NA;NR_030606.1;NA;NA;XM_006520141.3;XM_006520142.3;XM_006520138.3;NM_177151.3;XM_006520139.3;XM_006520140.3	Mir599;Mir599;Mir875;Mir875;Mir875;Vps13b;Vps13b;Vps13b;Vps13b;Vps13b;Vps13b	-3083;-3137;-2954;-2999;-2964;0;0;0;0;0;0	40	24	16	91	83	8	52	52	0	47	47	0	28	25	3
chr15	38487001	38488000	1000	*	3.21341e-05	0.0124901	-29.4605	Promoter (2-3kb)	15	38490473	38490493	21	2	Mir6951	NA	2493	NM_001102458.1;NM_001301688.1;NM_018745.5;NR_125913.1;XM_006520117.1;XM_006520114.3;NA;NR_105916.1;NA	Azin1;Azin1;Azin1;Azin1;Azin1;Azin1;Mir6951;Mir6951;Mir6951	0;0;0;0;10757;31285;2493;2547;2542	17	8	9	25	23	2	33	32	1	18	18	0	18	18	0
chr15	51990001	51991000	1000	*	0.000168393	0.0371646	-21.7121	Promoter (<=1kb)	15	51962604	51991264	28661	2	Rad21	XM_006520645.1	264	XM_006520645.1;NM_009009.4;XM_006520644.1	Rad21;Rad21;Rad21	0;0;0	48	17	31	106	13	93	20	8	12	31	21	10	83	24	59
chr15	52090001	52091000	1000	*	0.00011992	0.0298531	41.035	Promoter (<=1kb)	15	52089267	52090025	759	1	Gm2387	Gm2387	734	Gm2387	Gm2387	0	11	11	0	15	13	2	25	13	12	13	3	10	11	9	2
chr15	74929001	74930000	1000	*	0.000131083	0.0317079	-25.6151	Promoter (<=1kb)	15	74930240	74935442	5203	1	Gm39556	XR_001781690.1	-240	XR_001781691.1;XR_001781690.1;XR_875421.2;XR_875424.2;XR_001781689.1;XR_875423.2;XR_875425.2;Gm6610	Gm39556;Gm39556;Gm39556;Gm39556;Gm39556;Gm39556;Gm39556;Gm6610	0;-240;-1156;-1156;-1158;-1162;-1164;5363	41	35	6	23	10	13	44	43	1	11	9	2	53	48	5
chr15	74992001	74993000	1000	*	2.05984e-06	0.0016884	-42.7497	Promoter (1-2kb)	15	74991998	74994447	2450	2	Gm41348	XR_875429.2	1447	XR_875428.1;XR_875426.1;XR_001781692.1;XR_875429.2;Gm8000;NM_001271416.1;NM_001271417.1;NM_001271418.1;NM_001271419.1;NM_001271446.1;NM_010738.3	Gm28068;Gm28068;Gm28068;Gm41348;Gm8000;Ly6a;Ly6a;Ly6a;Ly6a;Ly6a;Ly6a	0;0;0;0;-3522;5031;5031;5031;5031;5031;5031	12	1	11	36	7	29	34	17	17	31	21	10	46	24	22
chr15	76554001	76555000	1000	*	0.000119051	0.0297176	-38.8088	Promoter (2-3kb)	15	76557435	76559860	2426	1	Gm35739	XR_384210.2	-2435	XR_384210.2	Gm35739	-2435	48	13	35	84	46	38	5	5	0	42	24	18	39	32	7
chr15	77955001	77956000	1000	*	7.1056e-11	3.58869e-07	20.0496	Promoter (<=1kb)	15	77940522	77956722	16201	2	Foxred2	NM_001017983.2	722	NM_018749.2;XM_006521192.1;NM_001017983.2;NM_001168260.1;XM_017316602.1;XM_006520943.3;XM_006520944.3;XM_006520945.2	Eif3d;Eif3d;Foxred2;Foxred2;Foxred2;Foxred2;Foxred2;Foxred2	14824;15088;0;0;0;0;0;0	138	96	42	152	85	67	139	86	53	106	37	69	345	108	237
chr15	79327001	79328000	1000	*	3.57414e-05	0.0134663	31.56	Promoter (<=1kb)	15	79286228	79328199	41972	2	Pla2g6	XM_006521152.2	199	XM_006521157.3;XM_006521152.2;XR_001781552.1;XM_006521154.1;XM_006521155.2;XM_006521160.2;XM_006521156.3;XM_006521159.3;NM_001199023.1;NM_001199024.1;NM_001199025.1;NM_016915.4;XM_006521153.3;XM_017316698.1	Pla2g6;Pla2g6;Pla2g6;Pla2g6;Pla2g6;Pla2g6;Pla2g6;Pla2g6;Pla2g6;Pla2g6;Pla2g6;Pla2g6;Pla2g6;Pla2g6	-3400;0;0;0;0;0;0;0;0;0;0;0;0;0	79	16	63	34	22	12	58	19	39	22	0	22	72	0	72
chr15	79891001	79892000	1000	*	9.2465e-06	0.00513409	61.9949	Promoter (<=1kb)	15	79892058	79909247	17190	1	Apobec3	XM_017316808.1	-58	XM_017316808.1;XM_017316806.1;XR_001781583.1;NM_001160415.1;NM_030255.3;XM_006521551.2;XM_017316807.1;NR_030675.1	Apobec3;Apobec3;Apobec3;Apobec3;Apobec3;Apobec3;Apobec3;D730005E14Rik	-58;-377;-377;-408;-408;-3028;-3165;0	13	13	0	12	11	1	15	5	10	5	0	5	22	15	7
chr15	83171001	83172000	1000	*	1.0036e-06	0.000968722	-42.5401	Promoter (<=1kb)	15	83153501	83172208	18708	2	Cyb5r3	NM_029787.2	208	XM_006520282.2;NM_029787.2;XM_006520283.3	Cyb5r3;Cyb5r3;Cyb5r3	-477;0;-793	31	9	22	25	0	25	20	13	7	28	17	11	11	5	6
chr15	96197001	96198000	1000	*	8.52608e-08	0.000139315	-23.2431	Promoter (<=1kb)	15	96190474	96197974	7501	2	2610037D02Rik	NR_040423.1	0	NR_040423.1;XM_011245785.2;NR_028311.1	2610037D02Rik;Gm38469;Gm4371	0;0;0	159	95	64	140	102	38	37	33	4	27	26	1	184	153	31
chr15	97965001	97966000	1000	*	5.22323e-08	9.58065e-05	29.9204	Promoter (<=1kb)	15	97964229	97970286	6058	1	Tmem106c	NM_201359.2	772	XM_006521120.3;XM_006521119.1;XM_006521117.1;XM_006521121.3;XM_017316672.1;NM_001252153.1;NM_201359.2	Tmem106c;Tmem106c;Tmem106c;Tmem106c;Tmem106c;Tmem106c;Tmem106c	0;0;0;0;0;0;0	5	3	2	98	72	26	49	14	35	19	5	14	18	10	8
chr15	99971001	99972000	1000	*	7.19486e-06	0.00424225	-33.9393	Promoter (<=1kb)	15	99972780	100016358	43579	1	Larp4	NM_001024526.2	-780	NR_028124.1;NM_001080948.2;NM_001284522.1;NM_001024526.2;NM_001284521.1;NM_001284523.1;XM_006520675.1;XM_017316524.1	2310068J16Rik;Larp4;Larp4;Larp4;Larp4;Larp4;Larp4;Larp4	1287;0;0;-780;-780;-780;-1361;-1361	20	5	15	37	9	28	38	30	8	21	9	12	50	27	23
chr15	100305001	100306000	1000	*	0.000273084	0.049733	-33.1446	Promoter (<=1kb)	15	100304817	100314348	9532	1	Mettl7a1	NM_027334.3	184	XM_006521389.1;XM_006521390.3;XM_011245728.1;NM_027334.3	Mettl7a1;Mettl7a1;Mettl7a1;Mettl7a1	0;0;0;0	12	4	8	17	0	17	10	3	7	37	16	21	21	16	5
chr15	101744001	101745000	1000	*	2.33844e-05	0.00994889	69.3122	Promoter (<=1kb)	15	101733949	101743097	9149	2	Krt71	NM_019956.1	-904	NM_019956.1	Krt71	-904	6	6	0	5	5	0	18	5	13	6	0	6	14	9	5
chr15	101817001	101818000	1000	*	9.46148e-09	2.42602e-05	-21.0726	Promoter (<=1kb)	15	101810689	101818101	7413	2	Krt2	XM_011245476.1	101	XM_011245476.1;NM_010668.2	Krt2;Krt2	0;0	13	11	2	69	24	45	55	48	7	17	13	4	28	22	6
chr15	103011001	103012000	1000	*	3.98223e-07	0.000465214	-23.0094	Promoter (1-2kb)	15	103009562	103011881	2320	1	Hoxc6	NM_010465.2	1439	NM_175730.5;XM_006520469.2;XM_017316437.1;XM_006520468.3;NM_010465.2;NR_030526.1;NA;NA	Hoxc5;Hoxc6;Hoxc6;Hoxc6;Hoxc6;Mir615;Mir615;Mir615	-2008;0;0;0;0;-2910;-2926;-2969	73	4	69	99	24	75	39	23	16	28	4	24	114	46	68
chr16	4418001	4419000	1000	*	8.51721e-05	0.0239611	32.2116	Promoter (1-2kb)	16	4284886	4420498	135613	2	Adcy9	NM_001291910.1	1498	NM_001291910.1;NM_009624.3;XM_011245805.1;XM_011245806.1	Adcy9;Adcy9;Adcy9;Adcy9	0;0;0;0	15	14	1	32	28	4	47	19	28	23	11	12	44	38	6
chr16	4683001	4684000	1000	*	0.000172888	0.0377567	34.3112	Promoter (<=1kb)	16	4684070	4707695	23626	1	Dnaja3	NM_001135112.1	-70	NM_030205.4;NM_001135112.1;NM_023646.4	Coro7;Dnaja3;Dnaja3	-3281;-70;-70	49	3	46	16	10	6	5	0	5	21	0	21	16	0	16
chr16	4743001	4744000	1000	*	4.87494e-07	0.000544686	-31.4286	Promoter (1-2kb)	16	4741613	4766249	24637	1	Hmox2	NM_010443.2	1388	NM_001136066.2;NM_010443.2	Hmox2;Hmox2	0;0	28	23	5	40	22	18	29	29	0	5	5	0	7	7	0
chr16	13731001	13732000	1000	*	2.04555e-06	0.0016822	-28.5208	Promoter (<=1kb)	16	13715057	13731018	15962	2	Pla2g10	XM_017316987.1	0	NM_001291009.2;NM_011987.4;NR_110990.2;XM_017316987.1;NR_040574.1	Pla2g10;Pla2g10;Pla2g10;Pla2g10;Pla2g10os	-517;-517;-517;0;0	6	6	0	47	9	38	7	7	0	14	9	5	7	7	0
chr16	15609001	15610000	1000	*	3.8193e-16	5.23191e-12	-21.3645	Promoter (<=1kb)	16	15609020	15609623	604	1	Gm7748	Gm7748	0	Gm7748	Gm7748	0	317	140	177	129	92	37	129	88	41	98	89	9	198	155	43
chr16	16829001	16830000	1000	*	3.5492e-06	0.00256445	-24.8161	Promoter (<=1kb)	16	16753016	16829363	76348	2	Spag6l	NM_015773.2	0	NM_015773.2;XM_017317063.1	Spag6l;Spag6l	0;0	5	0	5	98	0	98	62	7	55	6	3	3	38	5	33
chr16	17406001	17407000	1000	*	1.01897e-05	0.00549905	-27.5397	Promoter (<=1kb)	16	17280351	17406314	125964	2	Pi4ka	NM_001001983.2	0	NM_001001983.2;XM_006522034.1;XM_006522036.3;NM_023348.4	Pi4ka;Pi4ka;Pi4ka;Snap29	0;-113;-113;0	87	0	87	25	0	25	36	3	33	5	3	2	21	3	18
chr16	26990001	26991000	1000	*	7.54512e-06	0.00439693	24.5769	Promoter (<=1kb)	16	26957235	26991652	34418	2	Gmnc	NM_001013761.2	652	NM_001013761.2;NM_001285918.1;XM_006522113.2	Gmnc;Gmnc;Gmnc	0;0;0	55	48	7	50	39	11	41	26	15	27	15	12	96	53	43
chr16	28596001	28597000	1000	*	5.11075e-09	1.46022e-05	24.457	Promoter (2-3kb)	16	28599940	28599961	22	2	Mir690	NA	2961	NM_010199.4;NR_030463.1;NA	Fgf12;Mir690;Mir690	0;3043;2961	32	32	0	68	67	1	65	50	15	40	27	13	5	4	1
chr16	30387001	30388000	1000	*	4.95063e-09	1.41852e-05	31.6469	Promoter (<=1kb)	16	30312423	30388530	76108	2	Atp13a3	NM_001128094.1	530	NM_001128094.1;NM_001128096.1;XM_011245879.2;XM_017316958.1	Atp13a3;Atp13a3;Atp13a3;Atp13a3	0;0;0;0	36	32	4	38	28	10	37	7	30	45	18	27	10	9	1
chr16	33063001	33064000	1000	*	9.81167e-07	0.000954018	-32.3333	Promoter (<=1kb)	16	33062521	33125659	63139	1	Lmln	NM_172823.2	480	XR_384560.3;XR_384561.3;XR_384562.3;XR_384563.3;NM_172823.2;NM_001130485.1;NM_001130484.1;NM_021338.3	Lmln;Lmln;Lmln;Lmln;Lmln;Rpl35a;Rpl35a;Rpl35a	0;0;0;0;0;6548;6519;6487	25	0	25	10	0	10	15	0	15	25	13	12	20	9	11
chr16	33186001	33187000	1000	*	1.47365e-05	0.00717923	26.5695	Promoter (<=1kb)	16	33185071	33243312	58242	1	Osbpl11	NM_176840.3	930	XM_011245797.2;NM_176840.3	Osbpl11;Osbpl11	0;0	20	14	6	5	0	5	33	2	31	5	0	5	26	5	21
chr16	33250001	33251000	1000	*	1.15833e-07	0.000176845	-46.6354	Promoter (<=1kb)	16	33251456	33299562	48107	1	Snx4	NM_080557.2	-456	NM_080557.2	Snx4	-456	31	13	18	6	2	4	33	32	1	35	22	13	57	53	4
chr16	33399001	33400000	1000	*	6.44069e-05	0.0199644	23.2944	Promoter (<=1kb)	16	33399312	33498645	99334	1	Zfp148	XM_006522101.3	0	NM_011749.4;XM_006522103.3;XM_006522098.3;XM_006522100.3;XM_011245888.2;XM_017316980.1;XM_006522099.3;XM_006522101.3;XM_006522102.3	Zfp148;Zfp148;Zfp148;Zfp148;Zfp148;Zfp148;Zfp148;Zfp148;Zfp148	0;0;0;0;0;0;0;0;-445	53	37	16	78	63	15	50	29	21	34	19	15	38	16	22
chr16	35940001	35941000	1000	*	2.28191e-05	0.00980216	-22.9574	Promoter (<=1kb)	16	35926515	35939027	12513	2	Dtx3l	NM_001013371.2	-974	NM_001013371.2;NM_030253.3;XM_006522756.3;XM_006522757.3;XM_006522755.2;XM_011246046.2	Dtx3l;Parp9;Parp9;Parp9;Parp9;Parp9	-974;0;0;0;0;-2378	110	39	71	91	34	57	79	54	25	45	29	16	117	53	64
chr16	36782001	36783000	1000	*	4.24923e-08	8.23495e-05	-20.6358	Promoter (1-2kb)	16	36750164	36784962	34799	2	Slc15a2	NM_021301.3	1962	NM_021301.3;XR_384581.3;NM_001145899.1	Slc15a2;Slc15a2;Slc15a2	0;0;0	88	4	84	29	15	14	51	5	46	21	13	8	63	47	16
chr16	37915001	37916000	1000	*	2.72727e-06	0.00208986	-22.2122	Promoter (<=1kb)	16	37915998	37997937	81940	1	Gpr156	XM_011245894.2	0	XM_011245894.2;NM_153394.2	Gpr156;Gpr156	0;0	107	31	76	90	33	57	61	32	29	60	32	28	86	51	35
chr16	44063001	44064000	1000	*	0.0001629	0.036386	27.5852	Promoter (<=1kb)	16	43980350	44063464	83115	2	Gramd1c	XM_006521894.2	0	XM_006521895.3;XM_006521894.2;XM_011245853.2	Gramd1c;Gramd1c;Gramd1c	-1280;0;0	30	23	7	20	18	2	23	15	8	20	15	5	37	10	27
chr16	44404001	44405000	1000	*	5.98132e-08	0.000105864	-26.4362	Promoter (1-2kb)	16	44406839	44482694	75856	1	Cfap44	XM_006521963.2	-1839	XR_001781809.1;XM_006521968.2;XR_875764.1;XR_875763.1;XR_875765.1;XM_011245864.2;NM_001033247.1;XM_006521963.2;XM_006521964.2	Cfap44;Cfap44;Cfap44;Cfap44;Cfap44;Cfap44;Cfap44;Cfap44;Cfap44	0;0;0;0;0;0;0;-1839;-1839	47	18	29	55	1	54	37	21	16	52	12	40	114	68	46
chr16	49297001	49298000	1000	*	1.72973e-05	0.00807383	-30.9729	Promoter (<=1kb)	16	49296397	49298601	2205	2	Gm5407	Gm5407	601	Gm5407	Gm5407	0	32	13	19	17	13	4	17	16	1	5	4	1	18	17	1
chr16	50363001	50364000	1000	*	2.46689e-05	0.0103477	-25.5183	Promoter (<=1kb)	16	50196603	50364532	167930	2	Bbx	XM_006522554.3	532	NM_027444.3;XM_006522546.2;XM_011246009.1;XM_006522554.3;XM_006522547.3;XM_006522549.3;XM_006522543.3;XM_006522553.3;XM_006522555.3;XM_006522561.3;XM_011246005.2;XM_011246007.2;XM_006522545.3;XM_006522544.3;XM_006522548.3;XM_006522560.3;XM_006522563.3;XM_011246008.2;XM_017317130.1	Bbx;Bbx;Bbx;Bbx;Bbx;Bbx;Bbx;Bbx;Bbx;Bbx;Bbx;Bbx;Bbx;Bbx;Bbx;Bbx;Bbx;Bbx;Bbx	0;0;0;0;0;0;0;0;0;0;0;0;0;0;0;0;0;0;0	44	25	19	108	39	69	19	18	1	36	24	12	11	6	5
chr16	50433001	50434000	1000	*	1.22892e-07	0.000183695	-22.1514	Promoter (<=1kb)	16	50196889	50432461	235573	2	Bbx	XM_017317130.1	-540	NM_027444.3;XM_006522546.2;XM_011246009.1;XM_006522547.3;XM_006522549.3;XM_006522543.3;XM_006522553.3;XM_006522555.3;XM_006522561.3;XM_011246005.2;XM_011246007.2;XM_006522545.3;XM_006522544.3;XM_006522548.3;XM_006522560.3;XM_006522563.3;XM_011246008.2;XM_017317130.1	Bbx;Bbx;Bbx;Bbx;Bbx;Bbx;Bbx;Bbx;Bbx;Bbx;Bbx;Bbx;Bbx;Bbx;Bbx;Bbx;Bbx;Bbx	0;0;0;0;0;0;0;0;0;0;0;0;0;0;0;0;0;0	43	17	26	115	11	104	68	31	37	30	9	21	31	20	11
chr16	59457001	59458000	1000	*	4.84716e-05	0.016537	30.3398	Promoter (<=1kb)	16	59457584	59460790	3207	1	Orai2-ps	Orai2-ps	0	NM_001081190.1;Orai2-ps	Gabrr3;Orai2-ps	0;0	20	11	9	25	18	7	42	21	21	77	15	62	20	6	14
chr16	64853001	64854000	1000	*	9.41904e-05	0.0257421	34.8539	Promoter (<=1kb)	16	64852085	64859491	7407	1	Cggbp1	NM_178647.2	916	XM_006521658.2;NM_178647.2;XM_006522586.2;XM_011246018.2;XM_011246020.1	Cggbp1;Cggbp1;Zfp654;Zfp654;Zfp654	0;0;-1124;-1003;-1124	43	16	27	20	15	5	34	10	24	23	4	19	59	10	49
chr16	75684001	75685000	1000	*	1.61816e-05	0.00769089	24.1968	Promoter (<=1kb)	16	75645638	75683274	37637	2	Gm41474	XR_876161.2	-727	XR_384965.1;XR_876161.2	Gm30162;Gm41474	0;-727	60	59	1	6	6	0	13	12	1	29	20	9	11	7	4
chr16	76403001	76404000	1000	*	2.57075e-05	0.0106361	-33.3228	Promoter (<=1kb)	16	76403206	76403711	506	2	Gm9843	Gm9843	0	Gm9843	Gm9843	0	94	19	75	141	41	100	37	19	18	47	20	27	10	8	2
chr16	90933001	90934000	1000	*	1.06018e-07	0.000163861	-39.8184	Promoter (<=1kb)	16	90925811	90934849	9039	2	1110004E09Rik	NM_026502.2	849	NM_026502.2;XM_006522846.2;XM_011246089.2;XM_011246083.1;XM_011246084.1;XM_011246081.2;XM_011246082.2;XM_017316836.1;XM_006522837.3;XM_011246079.2;XM_011246080.2;XM_011246078.2;XM_011246075.2;XM_011246077.2;XM_011246076.2;XM_017316840.1;XM_017316839.1;XM_017316841.1;XM_011246088.2;XM_017316838.1;XM_017316837.1;XM_011246085.2;XR_876128.2;NM_001164483.1;NM_001045515.1	1110004E09Rik;Synj1;Synj1;Synj1;Synj1;Synj1;Synj1;Synj1;Synj1;Synj1;Synj1;Synj1;Synj1;Synj1;Synj1;Synj1;Synj1;Synj1;Synj1;Synj1;Synj1;Synj1;Synj1;Synj1;Synj1	0;37434;41445;77095;77095;77876;77888;77889;77890;77891;77891;77893;77894;77894;78021;78130;78131;78131;78132;78132;78133;78134;78134;77308;77095	54	23	31	33	10	23	37	26	11	26	22	4	46	34	12
chr16	91268001	91269000	1000	*	0.000221733	0.0439162	-23.2834	Promoter (<=1kb)	16	91269769	91271939	2171	1	Olig1	NM_016968.4	-769	NM_016968.4	Olig1	-769	41	19	22	57	7	50	43	25	18	52	21	31	27	16	11
chr16	92457001	92458000	1000	*	3.38703e-07	0.000411762	36.6809	Promoter (<=1kb)	16	92457527	92464233	6707	1	LOC108168294	XR_001781958.1	0	XR_001781958.1;XR_001781959.1;NM_001081549.2	LOC108168294;LOC108168295;Rcan1	0;4526;0	15	15	0	15	15	0	52	41	11	20	20	0	36	4	32
chr16	93833001	93834000	1000	*	0.000266467	0.049046	-38.9182	Promoter (<=1kb)	16	93808397	93833516	25120	2	Gm30881	XR_385069.3	0	XR_385069.3;XR_876266.2;NM_001045529.3;XM_006523060.2	Gm30881;Gm30881;Morc3;Morc3	0;0;0;0	31	2	29	10	0	10	11	7	4	15	7	8	31	5	26
chr17	3273001	3274000	1000	*	9.85605e-05	0.0263489	-21.1018	Promoter (1-2kb)	17	3254258	3275815	21558	2	Gm34035	XR_001782146.1	1815	XR_001782146.1;XR_001782144.1;XR_001782145.1	Gm34035;Gm34035;Gm34035	0;0;0	15	8	7	59	2	57	50	22	28	41	10	31	10	8	2
chr17	3698001	3699000	1000	*	8.57205e-07	0.000862379	-36.3458	Promoter (1-2kb)	17	3635240	3696261	61022	2	Nox3	NM_198958.2	-1740	NM_198958.2	Nox3	-1740	52	21	31	34	18	16	56	42	14	14	11	3	22	21	1
chr17	5974001	5975000	1000	*	5.22872e-06	0.0033733	-31.25	Promoter (<=1kb)	17	5975132	6040138	65007	1	Synj2	XM_017317373.1	-132	NM_001113352.2;NM_001113353.2;XM_006523204.2;XM_006523203.1;XM_006523212.2;XM_006523206.2;XM_006523208.3;XR_385128.2;XR_385129.3;XM_006523205.3;XM_017317373.1;NM_001113351.1;NM_011523.2	Synj2;Synj2;Synj2;Synj2;Synj2;Synj2;Synj2;Synj2;Synj2;Synj2;Synj2;Synj2;Synj2	0;0;0;0;0;0;0;0;0;0;-132;-586;-586	10	5	5	8	7	1	58	58	0	5	5	0	6	6	0
chr17	7171001	7172000	1000	*	1.89648e-05	0.00862038	21.5207	Promoter (<=1kb)	17	7170205	7303315	133111	1	Rps6ka2	XM_006523200.1	796	XM_006523199.3;XM_006523201.1;XM_006523198.3;NM_011299.4;XM_006523200.1	Rps6ka2;Rps6ka2;Rps6ka2;Rps6ka2;Rps6ka2	0;0;0;0;0	31	18	13	28	20	8	31	3	28	5	2	3	5	4	1
chr17	7944001	7945000	1000	*	7.29661e-06	0.00429212	57.7673	Promoter (<=1kb)	17	7945614	7979556	33943	1	Rsph3a	NM_025789.5	-614	XR_001782310.1;XR_001782308.1;XR_001782309.1;XR_001782315.1;NM_025789.5	Gm1604a;Gm1604a;Gm1604a;Gm1604a;Rsph3a	0;0;0;0;-614	6	6	0	13	12	1	47	13	34	10	2	8	40	27	13
chr17	14204001	14205000	1000	*	1.54116e-06	0.00134834	-24.5385	Promoter (<=1kb)	17	14195230	14204337	9108	2	Dact2	XM_006524227.3	0	NM_172826.3;XM_006524227.3;XR_001782252.1;XR_001782253.1	Dact2;Dact2;Gm34510;Gm34510	-170;0;0;-1830	65	10	55	105	19	86	20	11	9	29	3	26	53	31	22
chr17	14935001	14936000	1000	*	1.03551e-05	0.00554936	-36.9935	Promoter (<=1kb)	17	14840891	14934794	93904	2	Wdr27	XM_017317639.1	-207	XM_006524929.3;XM_011246612.2;NM_175173.3;XM_006524928.1;XR_001782112.1;XM_017317639.1;XM_006524926.3;XM_006524925.3;XM_017317640.1;XM_011246611.1;XM_006524932.1;XM_011246616.1;XM_011246614.1;XM_006524931.2;XM_011246617.2;XM_017317641.1;XM_017317642.1;XM_006524936.1	Wdr27;Wdr27;Wdr27;Wdr27;Wdr27;Wdr27;Wdr27;Wdr27;Wdr27;Wdr27;Wdr27;Wdr27;Wdr27;Wdr27;Wdr27;Wdr27;Wdr27;Wdr27	0;0;0;0;0;-207;0;0;0;0;0;0;0;0;0;0;0;0	15	3	12	51	11	40	27	18	9	15	9	6	15	7	8
chr17	21708001	21709000	1000	*	1.29542e-05	0.00651095	-32.7778	Promoter (<=1kb)	17	21707741	21725636	17896	1	Zfp760	NM_001008501.2	260	NM_001008501.2	Zfp760	0	25	0	25	17	0	17	15	2	13	16	4	12	10	6	4
chr17	21845001	21846000	1000	*	6.50258e-06	0.00396016	30.3562	Promoter (<=1kb)	17	21816876	21845759	28884	2	Zfp820	NM_029281.2	0	XR_385461.2;NM_029281.2	Gm31758;Zfp820	0;0	10	3	7	23	10	13	85	0	85	5	0	5	47	9	38
chr17	23534001	23535000	1000	*	0.000273765	0.0498347	-28.0239	Promoter (<=1kb)	17	23533962	23534034	73	1	n-TKctt13	rna94344	39	XR_876658.2;XR_876659.2;rna94345;rna94344	Gm41543;Gm41543;n-TKctt12;n-TKctt13	3674;3674;404;0	12	0	12	5	0	5	20	7	13	13	1	12	58	24	34
chr17	23924001	23925000	1000	*	3.62518e-09	1.09406e-05	-62.3552	Promoter (<=1kb)	17	23913034	23925979	12946	2	Gm41545	XR_876668.2	979	XM_006524740.1;NM_001077633.1;XR_876668.2	Dcpp3;Dcpp3;Gm41545	7303;6543;0	5	0	5	65	4	61	27	8	19	6	4	2	12	12	0
chr17	24427001	24428000	1000	*	7.80168e-07	0.000801817	-22.9819	Promoter (<=1kb)	17	24426683	24439316	12634	1	Eci1	NM_010023.4	318	NM_010023.4;XM_017317362.1;NM_001080127.1;NM_001080128.1;NM_009070.2	Eci1;Rnps1;Rnps1;Rnps1;Rnps1	0;12359;12326;12326;12326	67	29	38	17	17	0	12	12	0	15	15	0	31	26	5
chr17	26095001	26096000	1000	*	2.7872e-08	5.89259e-05	-24.5497	Promoter (<=1kb)	17	26091734	26095519	3786	2	Nme4	XM_006524677.3	0	NM_011933.2;Gm8186;XM_006524677.3;NM_019731.1	Decr2;Gm8186;Nme4;Nme4	-4837;3257;0;0	50	2	48	57	0	57	15	3	12	19	6	13	57	16	41
chr17	26096001	26097000	1000	*	7.04321e-05	0.0212593	-68.5714	Promoter (<=1kb)	17	26091734	26095519	3786	2	Nme4	XM_006524677.3	-482	Gm8186;XM_006524677.3;NM_019731.1	Gm8186;Nme4;Nme4	2257;0;0	5	1	4	5	1	4	15	12	3	5	5	0	21	18	3
chr17	30602001	30603000	1000	*	0.000107287	0.0278981	-43.8095	Promoter (<=1kb)	17	30602591	30603710	1120	1	LOC102631653	LOC102631653	0	NM_001113560.1;NM_025374.3;LOC102631653	Glo1;Glo1;LOC102631653	0;0;0	10	5	5	5	3	2	5	5	0	5	5	0	28	27	1
chr17	31563001	31564000	1000	*	9.17955e-20	1.69992e-15	-31.6993	Promoter (<=1kb)	17	31564721	31607691	42971	1	Pknox1	XM_006523854.2	-721	XM_006523854.2;XM_006523855.2;XM_006523856.3;XM_006523857.3;XM_006523858.1;NM_016670.3;NR_027493.1	Pknox1;Pknox1;Pknox1;Pknox1;Pknox1;Pknox1;Pknox1	-721;-721;-721;-721;-721;-773;-773	66	7	59	106	3	103	65	10	55	108	59	49	126	57	69
chr17	39844001	39845000	1000	*	0	0	21.3264	Promoter (1-2kb)	17	39846354	39848202	1849	1	Rn18s-rs5	Rn18s-rs5	-1354	XR_877120.2;Rn18s-rs5	LOC101056014;Rn18s-rs5	53385;0	23158	10396	12762	29112	16297	12815	21922	5301	16621	17376	7472	9904	11114	2239	8875
chr17	39846001	39847000	1000	*	0	0	24.026	Promoter (<=1kb)	17	39846354	39848202	1849	1	Rn18s-rs5	Rn18s-rs5	0	XR_877120.2;Rn18s-rs5	LOC101056014;Rn18s-rs5	51385;0	31226	18737	12489	42803	30813	11990	25622	10192	15430	25879	15660	10219	12943	3316	9627
chr17	44134001	44135000	1000	*	5.61603e-06	0.00355903	-20.1565	Promoter (<=1kb)	17	44134664	44280169	145506	1	Clic5	XM_006524135.3	0	XM_006524135.3	Clic5	0	43	11	32	56	8	48	37	26	11	5	2	3	10	1	9
chr17	46143001	46144000	1000	*	8.19176e-07	0.000833343	44.4444	Promoter (<=1kb)	17	46129277	46144198	14922	2	Rsph9	NM_029338.3	198	NM_025649.3;XM_006525075.3;NM_029338.3;XM_006525074.3;XM_011246700.2	Mad2l1bp;Rsph9;Rsph9;Rsph9;Rsph9	9551;0;0;0;0	15	15	0	5	0	5	5	0	5	10	0	10	6	1	5
chr17	53688001	53689000	1000	*	5.11116e-05	0.0170828	-40.3573	Promoter (<=1kb)	17	53674786	53689297	14512	2	Sgol1	XM_011246642.2	297	XR_001782262.1;XM_017317772.1;XM_011246642.2;XM_017317658.1;NM_028232.2	Gm31532;Gm31532;Sgol1;Sgol1;Sgol1	-728;-3991;0;0;0	50	4	46	43	12	31	24	15	9	37	12	25	5	4	1
chr17	65612001	65613000	1000	*	9.19293e-13	7.47392e-09	-32.2479	Promoter (<=1kb)	17	65580053	65613555	33503	2	Vapa	NM_013933.3	555	NM_013933.3;XM_006524385.3;XM_017317500.1	Vapa;Vapa;Vapa	0;0;0	78	1	77	53	0	53	15	1	14	25	23	2	27	0	27
chr17	66075001	66076000	1000	*	2.28796e-05	0.00981734	24.9388	Promoter (<=1kb)	17	65965703	66076877	111175	2	Ankrd12	XM_006523394.3	877	XM_006523394.3;XM_006523395.3;XM_006523393.3;XM_006523396.3;XM_006523397.3;XM_006523399.3;NM_001025572.1;NM_001278415.1;NM_028388.3	Ankrd12;Ankrd12;Ankrd12;Ankrd12;Ankrd12;Ankrd12;Ankrd12;Ndufv2;Ndufv2	0;0;0;0;0;0;0;25559;25559	74	34	40	12	5	7	65	7	58	63	21	42	40	5	35
chr17	66076001	66077000	1000	*	4.84104e-05	0.0165336	22.6543	Promoter (<=1kb)	17	65965703	66076877	111175	2	Ankrd12	XM_006523394.3	0	XM_006523394.3;XM_006523395.3;XM_006523393.3;XM_006523396.3;XM_006523397.3;XM_006523399.3;NM_001025572.1;NM_001278415.1;NM_028388.3	Ankrd12;Ankrd12;Ankrd12;Ankrd12;Ankrd12;Ankrd12;Ankrd12;Ndufv2;Ndufv2	0;0;0;0;0;0;0;24559;24559	30	15	15	30	0	30	32	0	32	270	19	251	5	0	5
chr17	75465001	75466000	1000	*	9.34579e-05	0.0256119	-29.5238	Promoter (<=1kb)	17	75465332	75529054	63723	1	Rasgrp3	XM_006524272.3	0	XM_006524273.3;XM_006524271.3;NM_001166493.1;XM_006524272.3;NM_207246.4	Rasgrp3;Rasgrp3;Rasgrp3;Rasgrp3;Rasgrp3	0;0;0;0;0	26	0	26	44	0	44	7	2	5	10	0	10	5	3	2
chr17	78936001	78937000	1000	*	2.52239e-07	0.000323799	-41.298	Promoter (<=1kb)	17	78919003	78937070	18068	2	Cebpz	NM_001024806.2	70	NM_001024806.2;XM_006523558.3;XM_006524995.1;XR_385374.3;NM_028611.3	Cebpz;Cebpz;Ndufaf7;Ndufaf7;Ndufaf7	0;-906;-106;-106;-135	96	7	89	62	4	58	63	13	50	6	5	1	37	15	22
chr17	81068001	81069000	1000	*	3.18023e-07	0.000392137	-46.3095	Promoter (2-3kb)	17	81032748	81065135	32388	2	Thumpd2	XM_011246639.2	-2866	XM_011246637.2;XM_011246636.2;XR_001782115.1;NM_028138.1;XR_001782116.1;XR_876548.2;XM_017317656.1;XM_011246639.2	Thumpd2;Thumpd2;Thumpd2;Thumpd2;Thumpd2;Thumpd2;Thumpd2;Thumpd2	-2915;-2879;-2866;-2916;-2867;-2866;-2866;-2866	47	10	37	72	42	30	38	28	10	16	15	1	11	10	1
chr17	83633001	83634000	1000	*	1.19776e-08	2.92878e-05	-54.737	Promoter (1-2kb)	17	83579949	83631993	52045	2	Kcng3	XM_006524200.3	-1008	XM_006524200.3;NM_153512.1	Kcng3;Kcng3	-1008;-1106	16	5	11	65	11	54	15	9	6	6	6	0	17	13	4
chr17	84676001	84677000	1000	*	6.79636e-25	2.0595e-20	-36.6487	Promoter (<=1kb)	17	84676302	84700333	24032	1	Abcg8	NM_001286005.1	0	NM_031884.2;NM_001286005.1	Abcg5;Abcg8	0;0	160	43	117	45	39	6	33	32	1	48	41	7	47	46	1
chr17	85091001	85092000	1000	*	1.23882e-07	0.000184898	-34.9495	Promoter (<=1kb)	17	85090700	85458580	367881	1	Camkmt	NM_028576.2	301	XM_006524993.3;XR_385373.2;XM_006524992.2;XM_006524994.3;NM_028576.2;XM_006524001.3;NM_001163622.1;NM_001163623.1;NM_145984.3;NM_001163624.1	Camkmt;Camkmt;Camkmt;Camkmt;Camkmt;Prepl;Prepl;Prepl;Prepl;Prepl	0;0;0;0;0;-742;-734;-734;-734;-727	5	0	5	55	11	44	33	28	5	10	5	5	6	0	6
chr17	87026001	87027000	1000	*	3.70433e-09	1.11241e-05	-32.8218	Promoter (<=1kb)	17	87025561	87035808	10248	1	Cript	NM_019936.3	440	NM_019936.3;XM_006523831.2;NM_008838.1	Cript;Pigf;Pigf	0;-530;-600	27	16	11	130	41	89	64	47	17	12	12	0	49	30	19
chr17	88669001	88670000	1000	*	0.00016477	0.03664	-24.2059	Promoter (<=1kb)	17	88668660	88715150	46491	1	Gtf2a1l	NM_023630.2	341	XM_011246628.2;NM_023630.2	Gtf2a1l;Gtf2a1l	0;0	46	16	30	16	9	7	7	6	1	15	7	8	56	43	13
chr18	7608001	7609000	1000	*	1.6837e-13	1.54468e-09	24.1508	Promoter (<=1kb)	18	7348111	7608009	259899	2	Mpp7	XM_011247026.2	0	NM_001081287.2;XM_011247026.2;XM_017318007.1;XM_006526326.3;XM_006526325.3;XM_017318006.1;XM_011247025.2;XM_006526327.2;NM_001161620.1;XM_006526330.3;XM_017318009.1;XM_017318010.1	Mpp7;Mpp7;Mpp7;Mpp7;Mpp7;Mpp7;Mpp7;Mpp7;Mpp7;Mpp7;Mpp7;Mpp7	0;0;0;0;0;0;0;0;0;0;0;0	186	158	28	150	98	52	162	71	91	140	69	71	137	82	55
chr18	9957001	9958000	1000	*	1.83551e-06	0.00154245	37.8599	Promoter (<=1kb)	18	9958180	9995484	37305	1	Thoc1	NM_153552.3	-180	NM_153552.3	Thoc1	-180	6	4	2	21	13	8	87	6	81	21	11	10	5	1	4
chr18	12332001	12333000	1000	*	0.000129423	0.0314361	-28.303	Promoter (<=1kb)	18	12333718	12506992	173275	1	Lama3	XM_006525691.3	-718	XM_006525691.3;XR_385977.3;XM_006525686.3;XM_006525685.3;NM_010680.1	Lama3;Lama3;Lama3;Lama3;Lama3	-718;-725;-736;-750;-1024	53	34	19	52	28	24	48	34	14	5	5	0	56	51	5
chr18	12642001	12643000	1000	*	2.22308e-05	0.00961956	45.7843	Promoter (<=1kb)	18	12643533	12737052	93520	1	Ttc39c	NM_028341.4	-533	XR_001782425.1;XR_001782426.1;XR_877187.2;XR_877188.2;NM_028341.4	Gm41668;Gm41668;Gm41668;Gm41668;Ttc39c	10484;10484;10484;10484;-533	12	10	2	12	12	0	17	3	14	5	1	4	7	7	0
chr18	23955001	23956000	1000	*	4.91351e-05	0.0166477	-43.6508	Promoter (<=1kb)	18	23954688	23964671	9984	1	Zfp397	NM_027007.2	313	XM_011246996.2;XM_011246997.2;NM_027007.2;XM_011247056.2;XR_877220.2	Zfp397;Zfp397;Zfp397;Zscan30;Zscan30	0;0;0;0;0	5	0	5	25	0	25	31	0	31	14	9	5	12	8	4
chr18	23990001	23991000	1000	*	1.01511e-07	0.000158859	-51.631	Promoter (<=1kb)	18	23989634	24005371	15738	1	Zfp35	NM_011755.2	367	NM_011755.2;XM_011247056.2;XR_877220.2;XM_006526394.3;XM_006526391.3;XM_006526392.3;XM_006526393.3;XM_017318022.1	Zfp35;Zscan30;Zscan30;Zscan30;Zscan30;Zscan30;Zscan30;Zscan30	0;0;0;-2674;-2673;-2673;-2673;-2647	34	23	11	55	16	39	10	10	0	5	5	0	5	5	0
chr18	30273001	30274000	1000	*	1.54923e-06	0.00135304	-26.4069	Promoter (<=1kb)	18	30272896	30348120	75225	1	Pik3c3	NM_181414.5	105	XR_385985.2;NM_181414.5	Pik3c3;Pik3c3	0;0	25	0	25	63	21	42	28	26	2	6	0	6	11	4	7
chr18	34332001	34333000	1000	*	3.14728e-05	0.0123085	47.2847	Promoter (<=1kb)	18	34331145	34336599	5455	1	Srp19	NM_025527.3	856	XM_006526155.1;NM_025527.3	Srp19;Srp19	0;0	10	9	1	38	33	5	22	9	13	5	1	4	32	20	12
chr18	34652001	34653000	1000	*	4.80309e-08	9.01143e-05	-26.4743	Promoter (<=1kb)	18	34628348	34651749	23402	2	Cdc23	XM_006526084.3	-252	XM_006526084.3;NM_178347.4	Cdc23;Cdc23	-252;-265	78	3	75	93	35	58	15	7	8	21	7	14	73	45	28
chr18	36734001	36735000	1000	*	1.33319e-06	0.00120651	-44.955	Promoter (<=1kb)	18	36735016	36742400	7385	1	Tmco6	XM_006526276.3	-16	XM_006526276.3;XM_006526277.2;NM_028036.3	Tmco6;Tmco6;Tmco6	-16;-16;-70	74	2	72	35	0	35	5	2	3	5	4	1	37	7	30
chr18	36745001	36746000	1000	*	2.89157e-09	9.17958e-06	-58.9162	Promoter (<=1kb)	18	36744656	36757639	12984	1	Ik	NM_011879.2	345	NM_011879.2;NM_010885.5;XM_006526276.3;XM_006526277.2;NM_028036.3	Ik;Ndufa2;Tmco6;Tmco6;Tmco6	0;-414;9985;9985;9931	61	2	59	20	0	20	20	3	17	6	4	2	10	10	0
chr18	36929001	36930000	1000	*	3.10005e-05	0.0121809	-26.3937	Promoter (<=1kb)	18	36930285	37187657	257373	1	Pcdha1	NM_054072.1	-285	NM_054072.1	Pcdha1	-285	65	35	30	62	43	19	33	26	7	35	33	2	11	10	1
chr18	37686001	37687000	1000	*	1.94802e-07	0.000265037	-36.5233	Promoter (<=1kb)	18	37685400	37841870	156471	1	Pcdhga4	NM_033587.3	601	NM_001174154.2;NM_001301256.1;NM_001301259.1;NM_033584.1;NM_033585.1;NM_033586.2;NM_033587.3;NM_033574.3;NM_033575.3	Gm37013;Gm38666;Gm38667;Pcdhga1;Pcdhga2;Pcdhga3;Pcdhga4;Pcdhgb1;Pcdhgb2	0;0;0;0;0;0;0;0;0	93	23	70	10	6	4	10	10	0	18	9	9	15	13	2
chr18	37721001	37722000	1000	*	0.00016934	0.0372503	-20.4093	Promoter (<=1kb)	18	37720554	37841870	121317	1	Pcdhgb4	NM_033576.1	447	NM_001174154.2;NM_001301256.1;NM_001301259.1;NM_033584.1;NM_033585.1;NM_033586.2;NM_033587.3;NM_033588.4;NM_033589.1;NM_033590.3;NM_033591.3;NM_033574.3;NM_033575.3;NM_033576.1	Gm37013;Gm38666;Gm38667;Pcdhga1;Pcdhga2;Pcdhga3;Pcdhga4;Pcdhga5;Pcdhga6;Pcdhga7;Pcdhga8;Pcdhgb1;Pcdhgb2;Pcdhgb4	0;0;0;0;0;0;0;0;0;0;0;0;0;0	59	4	55	37	4	33	33	12	21	10	2	8	16	5	11
chr18	37765001	37766000	1000	*	6.12282e-07	0.000657661	-31.9444	Promoter (<=1kb)	18	37765580	37841873	76294	1	Pcdhga12	NM_033595.4	0	NM_001174154.2;NM_001301256.1;NM_001301259.1;NM_033584.1;NM_033593.3;NM_033594.2;NM_033595.4;NM_033585.1;NM_033586.2;NM_033587.3;NM_033588.4;NM_033589.1;NM_033590.3;NM_033591.3;NM_033592.3;NM_033574.3;NM_033575.3;NM_033576.1;NM_033577.1;NM_033578.3;NM_033579.1;NM_033580.2	Gm37013;Gm38666;Gm38667;Pcdhga1;Pcdhga10;Pcdhga11;Pcdhga12;Pcdhga2;Pcdhga3;Pcdhga4;Pcdhga5;Pcdhga6;Pcdhga7;Pcdhga8;Pcdhga9;Pcdhgb1;Pcdhgb2;Pcdhgb4;Pcdhgb5;Pcdhgb6;Pcdhgb7;Pcdhgb8	0;0;0;0;0;0;0;0;0;0;0;0;0;0;0;0;0;0;0;0;0;0	36	13	23	10	10	0	5	5	0	11	11	0	8	8	0
chr18	42261001	42262000	1000	*	9.69367e-07	0.000945724	36.6465	Promoter (<=1kb)	18	42202349	42262071	59723	2	Lars	NM_134137.2	71	XR_001782319.1;NM_134137.2	Lars;Lars	0;0	25	22	3	11	2	9	30	1	29	75	22	53	6	1	5
chr18	42274001	42275000	1000	*	1.81646e-08	4.19506e-05	-30.3823	Promoter (<=1kb)	18	42274380	42275197	818	2	Gm4013	NR_033452.1	197	NR_033452.1;NM_172626.2;XM_006525863.2;XM_006525864.2;XM_017317887.1	Gm4013;Rbm27;Rbm27;Rbm27;Rbm27	0;-353;-358;-358;-358	58	6	52	74	7	67	51	20	31	13	6	7	93	33	60
chr18	44337001	44338000	1000	*	0.000164893	0.0366591	34.226	Promoter (2-3kb)	18	44334074	44355722	21649	1	Myot	NM_001033621.3	2927	XM_006526131.3;XM_006526132.3;XM_006526133.3;NM_001033621.3	Myot;Myot;Myot;Myot	0;0;0;0	20	11	9	83	47	36	27	9	18	5	0	5	70	22	48
chr18	46356001	46357000	1000	*	5.78167e-09	1.63614e-05	-29.6807	Promoter (1-2kb)	18	46358887	46380566	21680	1	Gm32339	XR_001782501.1	-1887	XR_001782500.1;XR_001782501.1	Gm32288;Gm32339	0;-1887	124	22	102	37	6	31	132	48	84	71	28	43	67	43	24
chr18	46743001	46744000	1000	*	2.65433e-07	0.000337707	24.4336	Promoter (1-2kb)	18	46741890	46790619	48730	1	Ap3s1	XM_006525528.3	1111	NM_001303015.1;NM_009681.5;XM_006525526.2;XM_006525528.3;NM_026217.3;XM_006526187.1	Ap3s1;Ap3s1;Ap3s1;Ap3s1;Atg12;Atg12	0;0;0;0;-1422;-1162	56	51	5	33	26	7	48	35	13	35	3	32	11	11	0
chr18	51116001	51117000	1000	*	6.65017e-07	0.000705214	-45.8135	Promoter (<=1kb)	18	51117898	51304641	186744	1	Prr16	NM_001081224.2	-898	NM_001081224.2	Prr16	-898	30	5	25	56	33	23	5	4	1	24	23	1	32	24	8
chr18	53175001	53176000	1000	*	0.000138627	0.0328353	23.8095	Promoter (<=1kb)	18	53176289	53220835	44547	1	Snx2	XM_006526190.3	-289	XM_006526190.3;NM_026386.1	Snx2;Snx2	-289;-365	20	20	0	10	10	0	21	6	15	17	17	0	18	18	0
chr18	55133001	55134000	1000	*	3.97454e-12	2.72228e-08	-44.4257	Promoter (1-2kb)	18	55126838	55131737	4900	2	Gm34011	XR_386243.1	-1264	XR_386243.1;XR_001782449.1;XR_877424.1;XR_877419.2	Gm34011;Gm4221;Gm4221;Gm4221	-1264;0;0;0	78	15	63	25	7	18	40	11	29	22	20	2	56	48	8
chr18	57404001	57405000	1000	*	1.82229e-05	0.00837066	-38.5276	Promoter (<=1kb)	18	57405270	57415246	9977	1	Gm19500	XR_877456.2	-270	XR_877456.2;XR_386257.2;XR_877457.1	Gm19500;Gm19500;Gm19500	-270;-740;-746	21	13	8	14	5	9	54	48	6	23	21	2	22	18	4
chr18	60561001	60562000	1000	*	1.64101e-06	0.00141223	-32.5758	Promoter (<=1kb)	18	60560786	60572729	11944	1	Rbm22	NM_025776.2	215	XM_006526189.3;NM_026302.3;NM_025776.2	Dctn4;Dctn4;Rbm22	34842;34780;0	40	0	40	10	0	10	11	8	3	11	0	11	20	5	15
chr18	61727001	61728000	1000	*	0.000211432	0.0426446	29.703	Promoter (<=1kb)	18	61726390	61728254	1865	1	1500015A07Rik	NR_029432.1	611	NR_029432.1;NM_178928.4;NM_021296.2;XR_385980.3	1500015A07Rik;Afap1l1;Grpel2;Grpel2	0;58662;-670;-641	34	28	6	27	18	9	12	7	5	10	5	5	23	6	17
chr18	62975001	62976000	1000	*	6.29082e-05	0.0196773	36.8851	Promoter (1-2kb)	18	62977838	62999450	21613	1	Napg	XM_011246806.2	-1838	XM_011246806.2;XM_011246809.2;NM_028017.1	Napg;Napg;Napg	-1838;-1838;-1916	36	13	23	31	19	12	26	5	21	5	0	5	37	6	31
chr18	66676001	66677000	1000	*	3.2795e-05	0.0126621	-39.375	Promoter (1-2kb)	18	66673014	66674515	1502	2	Gm30190	XR_386295.2	-1486	XR_386296.2;XR_386295.2	Gm22219;Gm30190	0;-1486	32	26	6	5	2	3	31	31	0	11	11	0	10	10	0
chr18	67304001	67305000	1000	*	0.000127021	0.031064	54.8447	Promoter (<=1kb)	18	67289513	67305817	16305	2	Gm30321	XR_001782493.1	817	XR_001782491.1;XR_001782492.1;XR_001782495.1;XR_001782496.1;XR_001782497.1;XR_386300.3;XR_877509.2;XR_386299.3;XR_001782493.1;XR_001782494.1;NM_053261.2	Gm30321;Gm30321;Gm30321;Gm30321;Gm30321;Gm30321;Gm30321;Gm30321;Gm30321;Gm30321;Impa2	-3832;-3832;-3832;-3832;-3832;-3832;-3832;-1836;0;0;0	46	36	10	5	5	0	21	9	12	5	1	4	5	2	3
chr18	67642001	67643000	1000	*	1.65997e-05	0.00783323	-20.8275	Promoter (<=1kb)	18	67641599	67654162	12564	1	Psmg2	NM_134138.1	402	XM_006525899.2;NM_001081073.1;NM_134138.1	Cep76;Cep76;Psmg2	-732;-665;0	23	7	16	58	6	52	34	13	21	16	3	13	36	24	12
chr18	69343001	69344000	1000	*	0.000213222	0.0428501	-39.6014	Promoter (<=1kb)	18	69344488	69684234	339747	1	Tcf4	XM_017317857.1	-488	XM_017317857.1;XM_017317854.1;XM_006525753.3;XM_017317859.1;NM_013685.2;NM_001083967.1;XM_006525747.3;XM_017317855.1;XM_017317856.1;XM_006525752.3;XM_017317858.1;XM_006525751.3;XM_006525746.3;XM_006525748.3;XM_006525749.3;XM_006525750.3	Tcf4;Tcf4;Tcf4;Tcf4;Tcf4;Tcf4;Tcf4;Tcf4;Tcf4;Tcf4;Tcf4;Tcf4;Tcf4;Tcf4;Tcf4;Tcf4	0;0;0;0;0;0;0;0;0;0;0;0;0;0;0;0	48	20	28	23	9	14	10	5	5	10	10	0	10	9	1
chr18	73570001	73571000	1000	*	4.40274e-07	0.000504901	35.5649	Promoter (1-2kb)	18	73572592	73580457	7866	1	Mex3c	XM_011246932.2	-1592	XM_011246932.2;NM_001039214.4	Mex3c;Mex3c	-1592;-1705	19	19	0	14	13	1	19	4	15	5	5	0	13	8	5
chr18	80150001	80151000	1000	*	2.61176e-06	0.00202149	27.1512	Promoter (<=1kb)	18	80126321	80151456	25136	2	Adnp2	XM_006526466.2	456	XM_006526466.2;XM_006526465.3;NM_175028.1	Adnp2;Adnp2;Adnp2	0;0;0	11	3	8	31	11	20	40	1	39	61	3	58	19	1	18
chr18	82555001	82556000	1000	*	7.26468e-07	0.000760699	40	Promoter (<=1kb)	18	82554508	82585637	31130	1	Mbp	NM_001025254.2	493	NM_001025245.1;XM_006526456.2;XM_006526458.2;NM_010777.3;XM_006526454.2;XM_006526452.3;XM_006526453.2;XM_006526457.2;XM_006526455.1;NM_001025251.2;NM_001025255.2;NM_001025256.2;NM_001025258.2;NM_001025259.2;NM_001025254.2	Mbp;Mbp;Mbp;Mbp;Mbp;Mbp;Mbp;Mbp;Mbp;Mbp;Mbp;Mbp;Mbp;Mbp;Mbp	0;0;0;0;0;0;0;0;0;0;0;0;0;0;0	12	12	0	5	1	4	15	7	8	35	0	35	15	2	13
chr19	5024001	5025000	1000	*	3.35374e-07	0.000409928	-40.2023	Promoter (<=1kb)	19	5024006	5031972	7967	1	Slc29a2	NM_007854.3	0	XR_879471.2;NM_007854.3;XM_006531664.2;XM_017318055.1;XM_017318056.1;XM_017318057.1	Gm42063;Slc29a2;Slc29a2;Slc29a2;Slc29a2;Slc29a2	-2236;0;0;0;0;0	25	0	25	61	5	56	20	7	13	13	8	5	11	4	7
chr19	6988001	6989000	1000	*	0.000127924	0.031178	-27.4603	Promoter (<=1kb)	19	6982472	6987651	5180	2	Vegfb	NM_011697.3	-350	NM_020566.1;XM_006527239.3;XM_006527237.3;XM_011247304.2;XR_386530.1;XR_877702.2;NM_026675.2;XM_006527315.1;NM_001185164.1;NM_011697.3	Dnajc4;Dnajc4;Dnajc4;Dnajc4;Gm35838;Gm41803;Nudt22;Nudt22;Vegfb;Vegfb	0;0;0;0;-3674;7473;7037;7115;-350;-350	15	12	3	42	15	27	12	11	1	6	5	1	21	17	4
chr19	13285001	13286000	1000	*	0.000178179	0.0384503	28.0323	Promoter (1-2kb)	19	13282134	13283056	923	2	Olfr1464-ps1	Olfr1464-ps1	-1945	Olfr1464-ps1	Olfr1464-ps1	-1945	38	22	16	29	17	12	15	4	11	46	9	37	27	12	15
chr19	18714001	18715000	1000	*	9.20814e-09	2.37936e-05	45.5362	Promoter (<=1kb)	19	18713236	18718428	5193	1	D030056L22Rik	NM_177640.4	765	XM_006526950.3;NM_177640.4	D030056L22Rik;D030056L22Rik	0;0	5	4	1	75	42	33	78	13	65	46	8	38	27	9	18
chr19	21715001	21716000	1000	*	5.40897e-06	0.00346063	-25.4529	Promoter (1-2kb)	19	21713818	21732331	18514	1	Gm41818	XR_877759.1	1183	XR_877759.1	Gm41818	0	50	20	30	112	56	56	64	44	20	46	38	8	5	3	2
chr19	23498001	23499000	1000	*	5.2377e-05	0.0173837	31.3137	Promoter (1-2kb)	19	23496764	23523052	26289	1	Gm34012	XR_386614.2	1237	XR_386614.2	Gm34012	0	21	15	6	76	27	49	38	5	33	30	4	26	5	2	3
chr19	23760001	23761000	1000	*	2.05499e-06	0.00168719	28.3551	Promoter (1-2kb)	19	23758876	23949597	190722	1	Apba1	NM_177034.3	1125	XM_006527139.3;XM_006527140.3;NM_177034.3	Apba1;Apba1;Apba1	0;0;0	52	49	3	95	72	23	28	16	12	22	13	9	67	36	31
chr19	24175001	24176000	1000	*	1.01559e-08	2.57112e-05	29.8677	Promoter (<=1kb)	19	24094502	24174140	79639	2	Tjp2	NM_001198985.1	-861	NM_001198985.1;NM_011597.4;XM_017318136.1;XM_017318137.1;XM_011247219.2;XM_006526908.3	Tjp2;Tjp2;Tjp2;Tjp2;Tjp2;Tjp2	0;0;0;0;0;0	40	12	28	70	26	44	45	5	40	21	0	21	38	0	38
chr19	24279001	24280000	1000	*	8.82519e-08	0.000142342	37.465	Promoter (<=1kb)	19	24261453	24280586	19134	2	Fxn	NM_008044.2	586	NM_008044.2	Fxn	0	41	34	7	15	7	8	65	24	41	64	19	45	13	2	11
chr19	24860001	24861000	1000	*	2.82224e-05	0.0113938	-26.3437	Promoter (<=1kb)	19	24678261	24861842	183582	2	Pgm5	NM_175013.2	842	NM_175013.2	Pgm5	0	62	10	52	29	8	21	20	12	8	22	3	19	31	22	9
chr19	27324001	27325000	1000	*	3.48253e-05	0.0132064	24.1485	Promoter (1-2kb)	19	27322619	27337179	14561	1	Kcnv2	NM_183179.1	1382	XR_386629.2;XM_006527067.3;NM_183179.1	Gm35268;Kcnv2;Kcnv2	11369;0;0	22	20	2	32	31	1	20	8	12	10	10	0	39	27	12
chr19	28012001	28013000	1000	*	1.17555e-07	0.000178383	31.2737	Promoter (<=1kb)	19	27762686	28011693	249008	2	Rfx3	XM_006526780.3	-308	NM_011265.3;XM_006526784.3;XM_017318086.1;XM_006526782.3;XM_011247169.2;XM_017318087.1;XM_006526778.3;XM_006526780.3	Rfx3;Rfx3;Rfx3;Rfx3;Rfx3;Rfx3;Rfx3;Rfx3	-835;-308;-308;-956;-309;-309;-308;-308	48	13	35	47	29	18	41	0	41	56	3	53	50	17	33
chr19	28559001	28560000	1000	*	5.40968e-07	0.000593167	34.1176	Promoter (1-2kb)	19	28262179	28561223	299045	2	Glis3	XM_006526985.3	1223	NM_001305671.1;NM_175459.6;XM_006526985.3;XM_006526984.3;XM_006526987.3;XM_006526988.3	Glis3;Glis3;Glis3;Glis3;Glis3;Glis3	0;0;0;0;0;0	17	15	2	42	28	14	8	4	4	24	0	24	5	4	1
chr19	29812001	29813000	1000	*	0.000179951	0.0386882	45.5109	Promoter (<=1kb)	19	29808108	29812974	4867	2	Ranbp6	NM_177721.4	0	XR_001782588.1;XM_017318197.1;XR_001782590.1;XR_001782589.1;NM_177721.4	9930021J03Rik;9930021J03Rik;9930021J03Rik;9930021J03Rik;Ranbp6	-3948;-3948;-3948;-3948;0	19	5	14	5	4	1	59	2	57	24	1	23	26	4	22
chr19	29925001	29926000	1000	*	0.000151266	0.0347338	-24.4919	Promoter (<=1kb)	19	29925114	29960715	35602	1	Il33	NM_133775.2	0	XR_877808.1;NM_133775.2;XM_011247399.2	Gm41832;Il33;Il33	0;0;0	71	44	27	33	26	7	23	23	0	26	22	4	5	5	0
chr19	34168001	34169000	1000	*	6.66236e-05	0.0204367	-22.6068	Promoter (1-2kb)	19	34122549	34166041	43493	2	Ankrd22	NM_024204.6	-1960	NM_024204.6	Ankrd22	-1960	18	1	17	13	9	4	80	58	22	5	1	4	16	14	2
chr19	34624001	34625000	1000	*	0.000219446	0.0436014	-44.7237	Promoter (<=1kb)	19	34623630	34624804	1175	1	Cnn2-ps	Cnn2-ps	371	Cnn2-ps;XM_006527265.3;XM_017318045.1;NM_053217.2	Cnn2-ps;Ifit1bl1;Ifit1bl2;Ifit1bl2	0;0;0;0	66	8	58	5	2	3	34	11	23	5	4	1	5	5	0
chr19	34921001	34922000	1000	*	3.79644e-05	0.0140194	-40.9711	Promoter (<=1kb)	19	34922341	34966133	43793	1	Kif20b	XM_011247247.2	-341	XM_011247247.2;XM_006527082.3;XM_006527083.3;XM_006527084.3;NM_183046.1;XM_006527080.2;XM_006527081.2	Kif20b;Kif20b;Kif20b;Kif20b;Kif20b;Kif20b;Kif20b	-341;-341;-341;-353;-358;-434;-558	39	3	36	43	2	41	6	3	3	10	2	8	7	5	2
chr19	37264001	37265000	1000	*	3.27728e-06	0.00241687	-27.8282	Promoter (<=1kb)	19	37258423	37264095	5673	2	4931408D14Rik	NR_040298.1	0	NR_040298.1;NR_040299.1;NM_031156.3	4931408D14Rik;4931408D14Rik;Ide	0;0;69544	15	5	10	50	11	39	77	47	30	101	56	45	10	5	5
chr19	38525001	38526000	1000	*	1.1614e-06	0.00108542	34.3443	Promoter (<=1kb)	19	38524197	38785105	260909	1	Plce1	NM_019588.2	804	XM_011247378.1;XM_006527394.2;XM_011247379.1;XM_011247380.1;NM_019588.2	Plce1;Plce1;Plce1;Plce1;Plce1	0;0;0;0;0	25	25	0	10	8	2	36	21	15	68	30	38	62	40	22
chr19	40755001	40756000	1000	*	4.38361e-05	0.0154952	27.9274	Promoter (<=1kb)	19	40754741	40829057	74317	1	Cc2d2b	XM_011247419.1	260	XM_011247419.1;XM_017318327.1	Cc2d2b;Cc2d2b	0;-387	21	21	0	52	51	1	10	8	2	27	27	0	15	5	10
chr19	41016001	41017000	1000	*	5.29002e-06	0.00339977	38.1003	Promoter (<=1kb)	19	41017683	41020295	2613	1	LOC105246575	LOC105246575	-683	XR_877855.2;XR_877856.2;LOC105246575	LOC100861913;LOC100861913;LOC105246575	-4304;-1358;-683	18	15	3	25	20	5	48	15	33	38	21	17	43	19	24
chr19	41802001	41803000	1000	*	3.9374e-05	0.0144016	-40.0366	Promoter (<=1kb)	19	41766588	41802084	35497	2	Arhgap19	NM_001163495.1	0	NM_001163495.1;NM_027667.3;XR_877860.1	Arhgap19;Arhgap19;Gm41847	0;0;16642	6	4	2	35	5	30	5	5	0	5	4	1	13	8	5
chr19	42158001	42159000	1000	*	5.11346e-08	9.46938e-05	-28.6518	Promoter (<=1kb)	19	42159631	42160768	1138	1	Gm6937	Gm6937	-631	Gm6937	Gm6937	-631	31	23	8	28	18	10	39	39	0	25	24	1	43	42	1
chr19	44695001	44696000	1000	*	2.6663e-08	5.74546e-05	24.5545	Promoter (<=1kb)	19	44685753	44695379	9627	2	Gm26644	XR_877881.1	0	XR_877881.1;XR_386741.2	Gm26644;Gm26644	0;0	55	54	1	20	19	1	78	50	28	52	44	8	92	62	30
chr19	46393001	46394000	1000	*	6.27827e-06	0.00386117	23.914	Promoter (1-2kb)	19	46376814	46395735	18922	2	Actr1a	NM_016860.1	1735	NM_016860.1;NM_001025391.2;NM_015752.3	Actr1a;Sufu;Sufu	0;-2896;-2896	56	55	1	52	50	2	18	8	10	10	9	1	41	35	6
chr19	47013001	47014000	1000	*	9.50838e-06	0.00523812	-20.117	Promoter (<=1kb)	19	47014698	47024358	9661	1	Ina	NM_146100.4	-698	NM_146100.4;NM_001164363.1	Ina;Nt5c2	-698;0	36	3	33	38	7	31	28	13	15	37	20	17	6	0	6
chr19	47580001	47581000	1000	*	1.69243e-07	0.000236373	-33.1565	Promoter (<=1kb)	19	47580019	47645246	65228	1	Slk	NM_001164639.1	0	NM_001164639.1;NM_009289.3	Slk;Slk	0;0	28	0	28	10	0	10	49	36	13	45	0	45	50	13	37
chr19	47732001	47733000	1000	*	1.38358e-05	0.00683249	-24.9478	Promoter (<=1kb)	19	47731756	47735588	3833	1	Sfr1	NM_026377.2	245	XM_017318032.1;XM_017318031.1;XM_006526532.3;XM_011247103.2;NM_027559.2;XM_006527308.2;NM_026377.2	Cfap43;Cfap43;Cfap43;Cfap43;Cfap43;Sfr1;Sfr1	0;0;0;0;0;0;0	26	11	15	67	25	42	55	35	20	95	66	29	103	63	40
chr19	47756001	47757000	1000	*	5.0168e-06	0.00326979	-25.7032	Promoter (<=1kb)	19	47755022	47755157	136	2	Mir8090	NR_106165.1	-844	XM_017318032.1;XM_017318031.1;XM_006526532.3;XM_011247103.2;NM_027559.2;XM_006526533.3;XR_001782551.1;XM_006526534.3;NR_106165.1;NA	Cfap43;Cfap43;Cfap43;Cfap43;Cfap43;Cfap43;Cfap43;Cfap43;Mir8090;Mir8090	0;0;0;0;0;0;0;0;-844;-920	53	13	40	21	6	15	101	58	43	25	9	16	60	38	22
chr19	49868001	49869000	1000	*	0.000102481	0.027024	-23.6072	Promoter (<=1kb)	19	49868272	49870143	1872	1	Siah1-ps1	Siah1-ps1	0	Siah1-ps1	Siah1-ps1	0	84	28	56	128	43	85	40	30	10	18	9	9	132	61	71
chr19	53793001	53794000	1000	*	1.47004e-12	1.11367e-08	34.0948	Promoter (<=1kb)	19	53792903	53867083	74181	1	Rbm20	XM_006527385.3	98	XR_877920.1;XM_011247371.1;XM_011247374.1;NM_001170847.1;XM_011247372.2;XM_006527385.3	Gm30890;Rbm20;Rbm20;Rbm20;Rbm20;Rbm20	-4711;0;0;0;0;0	47	34	13	132	70	62	116	19	97	85	13	72	61	33	28
chr19	53943001	53944000	1000	*	6.13164e-07	0.000657901	39.822	Promoter (<=1kb)	19	53944232	54033128	88897	1	Shoc2	XM_006527228.3	-232	NM_001195338.1;NM_001195348.1;XM_006526550.3;XM_006526547.3;XM_011247106.2;XM_006526549.3;XM_006527228.3;NM_001168505.1;XM_011247299.2;XM_017318260.1;NM_019658.6	Bbip1;Bbip1;Bbip1;Bbip1;Bbip1;Bbip1;Shoc2;Shoc2;Shoc2;Shoc2;Shoc2	0;0;0;0;0;0;-232;-306;-824;-864;-876	32	18	14	33	13	20	10	0	10	5	1	4	25	1	24
chr19	56460001	56461000	1000	*	0.00024812	0.0469604	-37.3851	Promoter (<=1kb)	19	56461637	56486729	25093	1	Plekhs1	NM_001164263.1	-637	XM_006527018.2;NM_001164263.1;NM_172641.3	Plekhs1;Plekhs1;Plekhs1	0;-637;-637	9	1	8	6	0	6	21	16	5	19	10	9	6	0	6
chr19	57505001	57506000	1000	*	0.000174068	0.0378973	-32.5264	Promoter (2-3kb)	19	57508564	57512788	4225	1	6720468P15Rik	NR_040306.1	-2564	NR_040306.1;NR_040307.1	6720468P15Rik;6720468P15Rik	-2564;-3066	53	15	38	108	53	55	31	19	12	17	14	3	20	14	6
chr19	57607001	57608000	1000	*	4.2804e-05	0.0152143	43.7304	Promoter (2-3kb)	19	57610963	57685588	74626	1	Atrnl1	XR_001782587.1	-2963	XR_001782587.1;XM_006527052.2;XM_006527051.2;XM_006527049.2;XM_011247244.1;NM_181415.4	Atrnl1;Atrnl1;Atrnl1;Atrnl1;Atrnl1;Atrnl1	0;0;0;0;0;0	29	28	1	22	21	1	20	13	7	10	1	9	55	45	10
chr19	57609001	57610000	1000	*	7.41573e-05	0.021966	21.5968	Promoter (<=1kb)	19	57610963	57685588	74626	1	Atrnl1	XR_001782587.1	-963	XR_001782587.1;XM_006527052.2;XM_006527051.2;XM_006527049.2;XM_011247244.1;NM_181415.4	Atrnl1;Atrnl1;Atrnl1;Atrnl1;Atrnl1;Atrnl1	0;0;0;0;0;0	44	19	25	57	11	46	26	3	23	23	4	19	41	0	41
chr19	59456001	59457000	1000	*	8.65057e-05	0.0242381	30.3571	Promoter (1-2kb)	19	59425104	59458635	33532	2	Emx2os	NR_002863.2	1635	XM_006526657.3;NM_010132.2;NR_002863.2	Emx2;Emx2;Emx2os	-1640;-1690;0	20	19	1	15	13	2	20	12	8	6	5	1	21	8	13
chr19	60469001	60470000	1000	*	3.78064e-06	0.00268702	44.3142	Promoter (<=1kb)	19	60465641	60469431	3791	2	Prlhr	XM_006527057.2	0	XM_006527057.2;NM_201615.2	Prlhr;Prlhr	0;-697	11	10	1	15	9	6	38	5	33	12	9	3	19	1	18
chr19	60860001	60861000	1000	*	1.21405e-07	0.000182289	-63.415	Promoter (<=1kb)	19	60837277	60861430	24154	2	Sfxn4	NM_053198.3	430	NM_007452.2;XM_006527498.3;XM_011247409.2;XM_006527499.3;NM_053198.3;XR_001782624.1;XR_386528.2;XR_386527.2	Prdx3;Sfxn4;Sfxn4;Sfxn4;Sfxn4;Sfxn4;Sfxn4;Sfxn4	13538;-2624;0;0;0;0;0;0	20	3	17	34	16	18	7	7	0	5	5	0	24	20	4
chr1	4613001	4614000	1000	*	1.51677e-06	0.00133166	62.5	Promoter (<=1kb)	1	4613389	4617805	4417	1	Gm29874	XR_001778815.1	0	XR_001778817.1;XR_001778816.1;XR_001778815.1;XR_001778819.1;XR_373196.2;Gm7369;XR_001778806.1;XR_001778812.1	Gm29874;Gm29874;Gm29874;Gm29874;Gm29874;Gm7369;LOC108167609;LOC108167609	4064;0;0;0;0;2757;-4220;-4220	12	11	1	7	7	0	12	0	12	5	0	5	6	6	0
chr1	13105001	13106000	1000	*	0.000257835	0.0480848	-20.5584	Promoter (<=1kb)	1	13090688	13104959	14272	2	Gm39592	XR_865187.1	-42	XR_865187.1	Gm39592	-42	22	20	2	38	16	22	26	24	2	27	24	3	35	28	7
chr1	21240001	21241000	1000	*	0.000178838	0.0385261	28.301	Promoter (<=1kb)	1	21240585	21265575	24991	1	Gsta3	NM_001077353.2	0	XR_373236.2;NM_001077353.2;NM_001288617.1;NM_010356.4	Gm28836;Gsta3;Gsta3;Gsta3	0;0;0;0	44	32	12	5	2	3	9	1	8	8	4	4	13	3	10
chr1	23922001	23923000	1000	*	1.48194e-10	7.02155e-07	46.1362	Promoter (<=1kb)	1	23845625	23922381	76757	2	Smap1	NM_028534.3	0	NM_028534.3;XM_006496362.1	Smap1;Smap1	0;0	40	31	9	70	35	35	10	0	10	141	33	108	231	68	163
chr1	33839001	33840000	1000	*	7.85639e-08	0.00013094	-34.2704	Promoter (<=1kb)	1	33835899	33838914	3016	2	Gm15455	NM_001161816.1	-87	NM_001161816.1	Gm15455	-87	65	25	40	70	12	58	43	30	13	11	6	5	21	13	8
chr1	34440001	34441000	1000	*	2.00676e-07	0.000270302	31.0372	Promoter (<=1kb)	1	34439829	34445747	5919	1	Imp4	NM_178601.3	172	NM_027159.2;NM_178601.3	Ccdc115;Imp4	-329;0	8	5	3	35	31	4	24	15	9	33	14	19	63	18	45
chr1	36513001	36514000	1000	*	0.000200446	0.0413792	-24.399	Promoter (1-2kb)	1	36511876	36528237	16362	1	Cnnm3	NM_053186.2	1125	XM_006496356.3;NM_001039551.1;NM_053186.2;NM_033570.2	Cnnm3;Cnnm3;Cnnm3;Cnnm4	0;0;0;41404	73	22	51	58	32	26	34	25	9	40	30	10	76	40	36
chr1	40805001	40806000	1000	*	4.18856e-10	1.70266e-06	-44.1907	Promoter (<=1kb)	1	40805573	40856887	51315	1	Tmem182	XM_017321461.1	0	XM_017321461.1;NM_001081198.1;XM_006496124.1	Tmem182;Tmem182;Tmem182	0;0;0	51	31	20	82	26	56	16	14	2	15	14	1	21	19	2
chr1	42427001	42428000	1000	*	1.3974e-05	0.00688713	-28.1431	Promoter (<=1kb)	1	42399266	42427644	28379	2	Gm36678	XR_373375.1	0	XR_373375.1	Gm36678	0	7	7	0	47	12	35	5	5	0	7	7	0	11	8	3
chr1	42852001	42853000	1000	*	8.26902e-08	0.000136228	37.8789	Promoter (<=1kb)	1	42851238	42898295	47058	1	Mrps9	XM_006496257.3	763	NM_023514.4;XM_006496257.3	Mrps9;Mrps9	0;0	37	17	20	32	27	5	77	15	62	23	5	18	32	13	19
chr1	45314001	45315000	1000	*	4.82909e-06	0.00318752	55	Promoter (2-3kb)	1	45311538	45349706	38169	1	Col3a1	NM_009930.2	2463	NM_009930.2	Col3a1	0	12	10	2	14	14	0	5	5	0	5	0	5	10	1	9
chr1	46234001	46235000	1000	*	0.000124941	0.0306754	-21.9469	Promoter (<=1kb)	1	46222608	46233437	10830	2	Gm31046	XR_865413.1	-564	XM_011238490.2;XM_011238488.2;XM_006495929.3;XM_006495930.3;XM_006495931.3;XM_006495928.3;XM_011238495.2;XM_017320267.1;XM_011238494.2;XM_006495925.3;XR_373250.3;XM_006495915.3;XM_006495912.3;XM_006495913.3;XM_006495914.3;XM_011238487.2;XM_011238491.2;XM_006495916.3;NM_001160386.1;XM_006495918.3;XM_006495922.3;XM_006495919.1;XM_006495920.2;XM_006495921.1;XM_011238492.2;XM_006495923.1;XM_011238493…	Dnah7b;Dnah7b;Dnah7b;Dnah7b;Dnah7b;Dnah7b;Dnah7b;Dnah7b;Dnah7b;Dnah7b;Dnah7b;Dnah7b;Dnah7b;Dnah7b;Dnah7b;Dnah7b;Dnah7b;Dnah7b;Dnah7b;Dnah7b;Dnah7b;Dnah7b;Dnah7b;Dnah7b;Dnah7b;Dnah7b;Dnah7b;Dnah7b;Dnah7b;Gm31046;Gm31046	0;0;167576;167576;0;0;0;0;0;0;0;0;0;0;0;0;0;0;0;0;0;0;0;0;0;0;0;0;0;-564;-564	60	31	29	75	55	20	28	20	8	27	24	3	43	40	3
chr1	53351001	53352000	1000	*	0.000208962	0.0423389	-29.7045	Promoter (<=1kb)	1	53344617	53352752	8136	2	Asnsd1	NM_001290984.1	752	NM_001290984.1;NM_133728.3	Asnsd1;Asnsd1	0;0	46	29	17	49	11	38	36	28	8	10	8	2	47	28	19
chr1	54556001	54557000	1000	*	0.000152418	0.0348465	38.4737	Promoter (<=1kb)	1	54473000	54557684	84685	2	Pgap1	NM_001163314.2	684	NM_001163314.2	Pgap1	0	13	10	3	56	14	42	49	0	49	47	13	34	51	5	46
chr1	55407001	55408000	1000	*	1.39297e-06	0.00124818	32.1942	Promoter (1-2kb)	1	55404264	55405956	1693	2	LOC108167625	XR_001778928.1	-1045	XR_001778928.1;NM_001114663.1	LOC108167625;Plcl1	-1045;0	28	14	14	40	16	24	45	0	45	55	14	41	54	7	47
chr1	59542001	59543000	1000	*	2.43744e-06	0.00191395	-29.7186	Promoter (<=1kb)	1	59542981	59636417	93437	1	Gm973	XM_017321351.1	0	XR_373435.2;XR_373432.3;XR_865456.1;NM_001013771.2;XM_017321324.1;XM_017321326.1;XM_017321327.1;XM_017321333.1;XM_017321334.1;XM_017321344.1;XM_006496100.2;XM_017321335.1;XM_017321342.1;XM_017321345.1;XM_017321337.1;XM_017321340.1;XM_017321347.1;XM_017321351.1;XM_017321352.1;XM_017321355.1	Gm28411;Gm28411;Gm39649;Gm973;Gm973;Gm973;Gm973;Gm973;Gm973;Gm973;Gm973;Gm973;Gm973;Gm973;Gm973;Gm973;Gm973;Gm973;Gm973;Gm973	0;0;-4780;0;0;0;0;0;0;0;0;0;0;0;0;0;0;0;0;0	57	14	43	69	32	37	78	43	35	46	37	9	110	66	44
chr1	59606001	59607000	1000	*	1.30601e-10	6.27891e-07	-47.7765	Promoter (<=1kb)	1	59605704	59636417	30714	1	Gm973	XM_006496110.3	297	NM_001013771.2;XM_017321324.1;XM_017321326.1;XM_017321327.1;XM_017321333.1;XM_017321334.1;XM_017321344.1;XM_006496100.2;XM_017321335.1;XM_017321342.1;XM_017321345.1;XM_017321337.1;XM_017321340.1;XM_017321347.1;XM_017321351.1;XM_017321352.1;XM_017321355.1;XM_006496108.1;XM_017321350.1;XM_006496107.1;XM_006496109.3;XM_006496110.3	Gm973;Gm973;Gm973;Gm973;Gm973;Gm973;Gm973;Gm973;Gm973;Gm973;Gm973;Gm973;Gm973;Gm973;Gm973;Gm973;Gm973;Gm973;Gm973;Gm973;Gm973;Gm973	0;0;0;0;0;0;0;0;0;0;0;0;0;0;0;0;0;0;0;0;0;0	60	7	53	101	56	45	17	13	4	21	20	1	83	60	23
chr1	61376001	61377000	1000	*	4.26139e-05	0.0151705	-29.9747	Promoter (1-2kb)	1	61378432	61395904	17473	1	9530026F06Rik	NR_040483.1	-1432	NR_040483.1	9530026F06Rik	-1432	11	3	8	27	6	21	30	26	4	5	2	3	16	6	10
chr1	61640001	61641000	1000	*	7.39868e-06	0.00432418	-45.7274	Promoter (1-2kb)	1	61638824	62642284	1003461	1	Pard3b	NM_001081050.2	1177	XM_011238602.2;XM_006496298.3;NM_001081050.2	Pard3b;Pard3b;Pard3b	0;0;0	32	18	14	21	6	15	12	10	2	10	10	0	37	30	7
chr1	64531001	64532000	1000	*	0.000123204	0.0303908	26.5879	Promoter (<=1kb)	1	64532315	64602970	70656	1	Creb1	XM_006495653.3	-315	XM_006495653.3;XM_006495654.3;XM_006495650.3;XM_017314080.1;XM_006495652.3;XM_006495651.3;XM_017314099.1;XM_011238424.2;NM_001037726.1;NM_009952.2;NM_133828.2	Creb1;Creb1;Creb1;Creb1;Creb1;Creb1;Creb1;Creb1;Creb1;Creb1;Creb1	-315;-316;-654;-654;-655;-657;-660;-671;-804;-804;-804	34	19	15	54	23	31	43	11	32	25	6	19	49	9	40
chr1	69131001	69132000	1000	*	1.50182e-05	0.00728287	-26.8572	Promoter (<=1kb)	1	69130834	69131318	485	2	Gm8840	Gm8840	0	Gm8840	Gm8840	0	71	36	35	54	27	27	28	21	7	42	34	8	37	28	9
chr1	69951001	69952000	1000	*	1.31543e-05	0.00656401	27.0087	Promoter (<=1kb)	1	69951615	70725132	773518	1	Spag16	NM_025728.4	0	NM_029160.3;NM_025728.4	Spag16;Spag16	0;0	84	44	40	63	34	29	53	7	46	74	12	62	108	53	55
chr1	71326001	71327000	1000	*	4.74035e-05	0.0162955	30.8001	Promoter (<=1kb)	1	71327290	71329244	1955	1	Gm39659	XR_865506.1	-290	NM_175210.3;XR_865506.1	Abca12;Gm39659	0;-290	34	26	8	40	38	2	23	12	11	10	6	4	19	10	9
chr1	72640001	72641000	1000	*	4.33243e-05	0.0153578	33.7157	Promoter (<=1kb)	1	72640226	72642976	2751	1	Gm39662	XR_001778970.1	0	NM_176980.4;XM_006496059.3;XM_017321180.1;XM_006496060.2;XR_001778970.1;XR_865526.2;XR_865527.2;XM_006496141.3;XM_006496143.3;NM_018817.2;XM_006496142.3;XM_006496144.1;XM_006496145.3	Ankar;Ankar;Ankar;Ankar;Gm39662;Gm39662;Gm39662;Smarcal1;Smarcal1;Smarcal1;Smarcal1;Smarcal1;Smarcal1	59564;59539;40972;59564;0;0;0;103310;102931;56750;56513;54790;52938	39	20	19	26	14	12	38	2	36	25	0	25	39	20	19
chr1	75210001	75211000	1000	*	8.45849e-05	0.023878	-29.697	Promoter (<=1kb)	1	75197534	75210754	13221	2	Glb1l	XM_006496553.3	0	XM_006496553.3;XM_006496555.3;XM_011238713.2;XM_017312537.1;XM_006496554.3;NM_029010.1;XR_373546.2;XR_001778395.1;XR_001778396.1;XM_017312546.1;XR_373547.2;NM_001277992.1;NM_011494.5;NR_102731.1;XM_006496461.1;XM_006496462.1;NM_001313723.1;NM_001313724.1;NM_009447.4;XM_006496478.1	Glb1l;Glb1l;Glb1l;Glb1l;Glb1l;Glb1l;Glb1l;Glb1l;Glb1l;Glb1l;Glb1l;Stk16;Stk16;Stk16;Stk16;Stk16;Tuba4a;Tuba4a;Tuba4a;Tuba4a	0;0;0;0;0;0;0;0;0;0;0;0;0;0;0;0;8294;8294;8294;8860	12	0	12	56	0	56	5	0	5	11	1	10	5	4	1
chr1	83159001	83160000	1000	*	3.73407e-08	7.39419e-05	56.1959	Promoter (<=1kb)	1	83159742	83186627	26886	1	Daw1	XM_006496550.3	0	XM_006496550.3;XM_006496547.2;XM_006496548.2;XM_006496549.2;XR_373545.2;NM_027725.3;NR_027636.1;XM_011238710.2;XM_011238711.2	Daw1;Daw1;Daw1;Daw1;Daw1;Daw1;Daw1;Daw1;Daw1	0;0;0;0;0;0;0;-2007;-2011	17	13	4	25	16	9	28	6	22	5	0	5	58	12	46
chr1	84933001	84934000	1000	*	0.00010567	0.02759	29.3016	Promoter (1-2kb)	1	84906705	84935083	28379	2	Slc16a14	NM_027921.1	1083	XR_865590.1;XM_006496551.3;NM_027921.1	Gm39669;Slc16a14;Slc16a14	-1272;0;0	5	4	1	25	21	4	40	16	24	5	4	1	21	8	13
chr1	85110001	85111000	1000	*	0.00023926	0.0460072	24.8614	Promoter (<=1kb)	1	85094157	85110502	16346	2	A530032D15Rik	XM_006496502.3	0	NM_213615.2;XM_006496502.3;XR_001778792.1;XM_006496590.1	A530032D15Rik;A530032D15Rik;A530040E14Rik;Gm35498	-148;0;0;7523	38	27	11	57	40	17	59	21	38	41	15	26	63	41	22
chr1	92179001	92180000	1000	*	9.50697e-08	0.000150189	37.2266	Promoter (<=1kb)	1	91928779	92180231	251453	2	Hdac4	XM_006529312.1	231	XM_006529312.1;XM_006529313.1;XM_006529315.2;XM_017319482.1;XM_017319501.1;XM_017319476.1;XM_017319477.1;XM_017319478.1;XM_017319479.1;NM_207225.2;XM_017319480.1;XM_017319486.1;XM_017319488.1;XM_017319498.1;XM_017319487.1	Hdac4;Hdac4;Hdac4;Hdac4;Hdac4;Hdac4;Hdac4;Hdac4;Hdac4;Hdac4;Hdac4;Hdac4;Hdac4;Hdac4;Hdac4	0;0;0;0;0;0;0;0;0;0;0;0;0;0;0	243	127	116	208	113	95	81	2	79	10	0	10	258	118	140
chr1	104768001	104769000	1000	*	1.57498e-05	0.00752498	-28.5332	Promoter (<=1kb)	1	104768819	104995481	226663	1	Cdh20	NM_011800.4	0	NM_011800.4	Cdh20	0	33	1	32	46	2	44	10	3	7	6	1	5	14	7	7
chr1	106074001	106075000	1000	*	5.31774e-06	0.00341318	-40.4059	Promoter (<=1kb)	1	106073189	106091455	18267	1	Gm26509	XR_878431.1	812	XR_878431.1	Gm26509	0	38	21	17	33	19	14	21	19	2	12	12	0	5	5	0
chr1	106795001	106796000	1000	*	3.43403e-06	0.00249929	30.5531	Promoter (<=1kb)	1	106770788	106796725	25938	2	Vps4b	NM_009190.2	725	NM_009190.2	Vps4b	0	37	27	10	21	20	1	29	24	5	60	25	35	69	25	44
chr1	111865001	111866000	1000	*	2.96871e-06	0.00224732	44.7297	Promoter (<=1kb)	1	111858701	111864969	6269	2	Dsel	XM_017321184.1	-32	XM_017321183.1;XM_017321184.1;NM_001081316.1	Dsel;Dsel;Dsel	-32;-32;-83	20	14	6	12	4	8	37	4	33	5	0	5	10	1	9
chr1	119912001	119913000	1000	*	0.000229537	0.0447474	-33.2864	Promoter (<=1kb)	1	119907890	119913168	5279	2	Tmem177	NM_175106.3	168	XR_001779366.1;XR_001779365.1;NM_175106.3	Gm28209;Gm28209;Tmem177	0;-365;0	15	0	15	44	5	39	84	31	53	5	4	1	19	0	19
chr1	130732001	130733000	1000	*	4.3205e-09	1.27074e-05	-53.7004	Promoter (<=1kb)	1	130731976	130744622	12647	1	AA986860	NM_177604.3	25	XM_017319617.1;NM_177604.3;NM_001162415.1	AA986860;AA986860;Pfkfb2	0;0;-2748	16	1	15	5	4	1	11	11	0	7	7	0	21	19	2
chr1	130804001	130805000	1000	*	1.27899e-06	0.00116802	-44.0972	Promoter (1-2kb)	1	130802961	130814589	11629	1	Fcamr	XM_011248055.2	1040	XM_006529787.3;XM_017321925.1;NM_001170632.1;NM_144960.2;XM_017321921.1;XM_017321922.1;XM_017321924.1;XM_017321923.1;XM_011248055.2;XR_001779412.1;XR_001779413.1;XR_001779414.1	Fcamr;Fcamr;Fcamr;Fcamr;Fcamr;Fcamr;Fcamr;Fcamr;Fcamr;LOC102640771;LOC102640771;LOC102640771	0;0;0;0;0;0;0;0;0;13910;13910;13910	27	15	12	16	9	7	6	6	0	5	5	0	17	17	0
chr1	133033001	133034000	1000	*	5.2092e-05	0.0173063	-46.6667	Promoter (<=1kb)	1	133033962	133034034	73	1	n-TKctt26	rna4178	0	XR_878532.1;NM_001302802.1;rna4179;rna4178	Gm41953;Mdm4;n-TKctt25;n-TKctt26	0;-2414;399;0	10	0	10	15	0	15	5	5	0	5	0	5	5	2	3
chr1	134407001	134408000	1000	*	9.57621e-05	0.0259799	31.1111	Promoter (1-2kb)	1	134405990	134411738	5749	1	Cyb5r1	NM_028057.2	1011	XR_387196.2;NM_028057.2	Cyb5r1;Cyb5r1	0;0	17	17	0	31	31	0	5	5	0	6	4	2	5	2	3
chr1	136414001	136415000	1000	*	1.24203e-06	0.00114344	-27.3979	Promoter (<=1kb)	1	136415271	136440220	24950	1	Ddx59	NM_026500.3	-271	NR_024328.1;NM_026500.3;XM_006529843.2;XM_006529842.3;XM_006529844.3	9230116N13Rik;Ddx59;Ddx59;Ddx59;Ddx59	0;-271;-273;-273;-273	93	9	84	44	15	29	50	22	28	52	15	37	28	21	7
chr1	136465001	136466000	1000	*	9.30629e-05	0.0255527	-29.9135	Promoter (<=1kb)	1	136466290	136529591	63302	1	Kif14	XM_006529729.3	-290	XM_006529729.3;XM_011248043.2;XM_011248039.1;XM_011248040.1;XM_011248044.1;XM_011248046.1;XM_006529730.2;NM_001287179.2	Kif14;Kif14;Kif14;Kif14;Kif14;Kif14;Kif14;Kif14	-290;-290;-290;-290;-290;-290;-405;-1848	19	5	14	28	13	15	25	24	1	10	6	4	7	3	4
chr1	139268001	139269000	1000	*	8.04342e-05	0.0231066	21.399	Promoter (2-3kb)	1	139197709	139271619	73911	2	Crb1	XM_006529223.3	2619	XR_001783142.1;XR_001783143.1;XM_017319071.1;XM_006529223.3;XM_017319076.1;XM_006529224.3;XM_006529221.3;XM_006529217.3;NM_133239.2;XM_017319069.1;XR_001783144.1;XM_017319075.1	Crb1;Crb1;Crb1;Crb1;Crb1;Crb1;Crb1;Crb1;Crb1;Crb1;Crb1;Crb1	0;0;0;0;0;0;0;0;0;0;0;0	57	24	33	41	31	10	43	13	30	12	7	5	63	15	48
chr1	143701001	143702000	1000	*	3.93514e-06	0.00276928	25.6755	Promoter (<=1kb)	1	143636851	143702888	66038	2	Cdc73	XM_006529366.3	888	NM_145991.2;XM_006529366.3;XM_006529365.1	Cdc73;Cdc73;Cdc73	0;0;0	46	16	30	49	18	31	46	6	40	34	5	29	40	1	39
chr1	156304001	156305000	1000	*	8.7026e-07	0.000872764	27.8767	Promoter (<=1kb)	1	156255296	156304983	49688	2	Tdrd5	XM_006496728.2	0	XM_006496734.1;NM_001134741.1;NM_001277730.1;XM_006496728.2;XM_006496731.2;XM_006496733.2;XM_006496726.3;XM_006496727.3;XM_006496729.3;XR_001783746.1;XM_006496730.2;XM_006496732.2;XM_011238780.2	Tdrd5;Tdrd5;Tdrd5;Tdrd5;Tdrd5;Tdrd5;Tdrd5;Tdrd5;Tdrd5;Tdrd5;Tdrd5;Tdrd5;Tdrd5	-1533;-653;-395;0;0;0;0;0;0;0;0;0;0	60	46	14	17	8	9	55	18	37	15	5	10	39	14	25
chr1	156311001	156312000	1000	*	9.15169e-08	0.00014596	49.5833	Promoter (<=1kb)	1	156310719	156328035	17317	1	Nphs2	NM_130456.4	282	XM_011238765.2;XM_006496683.3;NM_130456.4;XM_006496684.3	Nphs2;Nphs2;Nphs2;Nphs2	0;0;0;-4823	24	13	11	21	14	7	20	5	15	5	0	5	40	3	37
chr1	160194001	160195000	1000	*	2.98941e-05	0.011891	25.6576	Promoter (<=1kb)	1	160195260	160201186	5927	1	Mrps14	NM_025474.3	-260	NM_025474.3;XM_006496954.3	Mrps14;Mrps14	-260;-331	49	33	16	45	23	22	10	4	6	48	4	44	42	22	20
chr1	163995001	163996000	1000	*	1.70815e-07	0.000238235	-31.2103	Promoter (<=1kb)	1	163952757	163994971	42215	2	BC055324	XM_006496910.3	-30	XM_006496911.3;XM_006496909.3;XM_006496910.3;NM_201364.1;XM_006496983.2;NM_027279.2	BC055324;BC055324;BC055324;BC055324;Mettl18;Mettl18	-30;-30;-30;-220;0;0	61	18	43	56	2	54	45	29	16	5	2	3	67	26	41
chr1	167309001	167310000	1000	*	0.000127908	0.031178	37.6789	Promoter (<=1kb)	1	167308670	167333978	25309	1	Tmco1	NM_001039483.1	331	NM_001039483.1	Tmco1	0	24	17	7	58	23	35	34	8	26	17	0	17	24	7	17
chr1	168495001	168496000	1000	*	4.27872e-05	0.0152143	27.677	Promoter (<=1kb)	1	168475634	168495913	20280	2	Gm39696	XR_865718.1	0	XR_865718.1;NR_105766.1;NA	Gm39696;Mir6348;Mir6348	0;4358;4261	17	15	2	27	27	0	59	35	24	10	4	6	20	20	0
chr1	169970001	169971000	1000	*	2.91147e-05	0.0116505	41.8945	Promoter (<=1kb)	1	169969409	169972396	2988	1	3110045C21Rik	NR_040438.1	592	NR_040438.1;NM_022563.2;XM_006496698.3;XM_006496697.3;XM_006496696.3;XM_006496667.2;NM_010476.3;XM_011238758.1;XM_017317108.1	3110045C21Rik;Ddr2;Ddr2;Ddr2;Ddr2;Hsd17b7;Hsd17b7;Hsd17b7;Hsd17b7	0;0;0;0;0;-765;-796;-763;-761	16	15	1	12	7	5	56	20	36	22	5	17	25	11	14
chr1	170631001	170632000	1000	*	0.000263203	0.0486601	-25.8183	Promoter (<=1kb)	1	170630872	170631553	682	1	Gm7299	Gm7299	129	Gm7299	Gm7299	0	58	33	25	38	16	22	34	26	8	10	7	3	39	31	8
chr1	171036001	171037000	1000	*	0.000171965	0.0376127	-26.2286	Promoter (<=1kb)	1	171037029	171037100	72	2	n-TDgtc4	rna5580	100	XR_373703.2;rna5580;rna5581;rna5582;rna5579	Gm35090;n-TDgtc4;n-TGtcc2;n-TLcag3;n-TNgtt6	-1983;100;1068;-1614;-1986	24	3	21	45	10	35	11	5	6	26	8	18	55	30	25
chr1	171057001	171058000	1000	*	0.00024903	0.0470311	-29.0813	Promoter (1-2kb)	1	171051169	171059403	8235	2	Fcgr3	NM_010188.5	1403	NM_010188.5;XM_006496661.3;XM_006496660.2;XM_006496658.2;XM_006496659.3	Fcgr3;Fcgr3;Fcgr3;Fcgr3;Fcgr3	0;0;0;0;0	45	19	26	28	14	14	17	8	9	27	23	4	15	14	1
chr1	171077001	171078000	1000	*	2.43464e-06	0.00191395	-21.368	Promoter (1-2kb)	1	171079406	171079477	72	2	n-TEctc7	rna5602	1477	rna5604;rna5599;rna5602;rna5601;rna5606;rna5603;rna5598;rna5600;rna5605	n-TDgtc6;n-TDgtc7;n-TEctc7;n-TGgcc13;n-TGgcc14;n-TGtcc4;n-TGtcc5;n-TLcag7;n-TLcag8	2678;-3937;1477;2699;-3876;2019;-4596;3382;-3233	117	52	65	43	24	19	75	59	16	55	36	19	54	38	16
chr1	171193001	171194000	1000	*	0.0001184	0.0296236	29.2309	Promoter (2-3kb)	1	171173264	171196268	23005	2	Pcp4l1	NM_025557.1	2268	NM_025557.1	Pcp4l1	0	37	35	2	10	8	2	21	11	10	11	9	2	10	4	6
chr1	171357001	171358000	1000	*	2.99618e-06	0.00225956	29.9109	Promoter (2-3kb)	1	171358449	171360798	2350	2	Klhdc9	NM_001033039.2	2798	NM_001033039.2;XM_017319306.1;NM_011070.3	Klhdc9;Pfdn2;Pfdn2	2798;0;0	57	39	18	86	72	14	24	5	19	34	23	11	46	23	23
chr1	172081001	172082000	1000	*	7.71382e-06	0.00446919	-38.338	Promoter (<=1kb)	1	172066017	172081278	15262	2	Ncstn	XM_017321872.1	0	NM_009938.4;NM_021607.3;XM_017321872.1;XR_373613.1;XM_006496952.3	Copa;Ncstn;Ncstn;Ncstn;Ncstn	-529;0;0;0;0	10	4	6	41	25	16	38	38	0	16	15	1	22	16	6
chr1	172615001	172616000	1000	*	5.52399e-05	0.0180228	-21.7094	Promoter (1-2kb)	1	172597185	172617050	19866	2	Fcrl6	XM_006496972.2	1050	XM_006496972.2;XM_006496971.2;XM_011238860.1;XM_011238861.1	Fcrl6;Fcrl6;Fcrl6;Fcrl6	0;0;0;0	26	2	24	5	1	4	5	0	5	5	2	3	27	18	9
chr1	175978001	175979000	1000	*	5.68531e-13	4.73912e-09	23.1393	Promoter (<=1kb)	1	175978218	175978943	726	2	Rbm8a2	Rbm8a2	0	XM_011238828.1;XM_006496898.3;XM_011238827.2;XM_017321175.1;XM_006496897.3;XM_006496900.3;XM_011238829.2;NM_001195816.1;NM_176916.4;XM_011238826.2;XM_017321154.1;Rbm8a2	Pld5;Pld5;Pld5;Pld5;Pld5;Pld5;Pld5;Pld5;Pld5;Pld5;Pld5;Rbm8a2	0;0;0;0;0;0;0;0;0;0;0;0	66	31	35	161	106	55	30	11	19	159	33	126	59	25	34
chr1	177458001	177459000	1000	*	2.36483e-07	0.000308725	46.9281	Promoter (<=1kb)	1	177457504	177461562	4059	1	Gm29856	XR_373736.3	497	XR_001779554.1;XR_373735.3;XR_373736.3	Gm29856;Gm29856;Gm29856	0;0;0	10	9	1	34	27	7	12	8	4	15	4	11	30	6	24
chr1	177786001	177787000	1000	*	4.84763e-05	0.016537	-33.5668	Promoter (<=1kb)	1	177786837	177787512	676	1	Gm16585	Gm16585	0	XR_001785476.1;NM_007422.3;Gm16585	Adss;Adss;Gm16585	0;0;0	28	13	15	56	21	35	13	12	1	28	18	10	40	28	12
chr1	180779001	180780000	1000	*	1.39533e-06	0.00124917	-35.438	Promoter (1-2kb)	1	180777970	180792160	14191	1	LOC102634584	XR_373751.3	1031	XR_373751.3	LOC102634584	0	27	15	12	72	11	61	34	17	17	13	9	4	15	14	1
chr1	183370001	183371000	1000	*	0.000100827	0.0267134	-48.6858	Promoter (<=1kb)	1	183326236	183369565	43330	2	Mia3	NM_177389.3	-436	NM_177389.3	Mia3	-436	15	6	9	31	10	21	6	6	0	10	9	1	45	29	16
chr1	184875001	184876000	1000	*	3.23314e-06	0.00239741	31.9792	Promoter (<=1kb)	1	184876223	184882281	6059	1	Gm34602	XR_001779590.1	-223	NM_178692.3;XR_001779590.1;XR_001779591.1;XR_001779592.1;XR_865819.2	C130074G19Rik;Gm34602;Gm34602;Gm34602;Gm39727	0;-223;-223;-223;8955	10	10	0	36	30	6	64	25	39	10	10	0	5	2	3
chr1	186031001	186032000	1000	*	0.000224745	0.0442691	23.0576	Promoter (2-3kb)	1	186031078	186034344	3267	2	Gm39729	XR_001779598.1	2344	XR_001779598.1	Gm39729	0	16	16	0	40	35	5	23	13	10	18	10	8	5	5	0
chr1	187452001	187453000	1000	*	0.000153029	0.034954	29.0845	Promoter (<=1kb)	1	187451870	187462781	10912	1	Gm37896	XR_865839.2	131	XR_865844.1;XR_865840.2;XR_865841.2;XR_373825.2;XR_865843.1;XR_865839.2	Gm37896;Gm37896;Gm37896;Gm37896;Gm37896;Gm37896	0;0;0;0;0;0	35	20	15	53	25	28	69	22	47	29	2	27	23	7	16
chr1	192135001	192136000	1000	*	4.77725e-05	0.0163997	34.5698	Promoter (<=1kb)	1	192136898	192151025	14128	1	Gm10516	NR_033536.1	-898	NR_033536.1;XR_865897.2;NM_001290278.1;NM_001290282.1;NM_144814.3;XM_006497244.2;XM_006497241.3;XR_001783754.1;XR_373892.2;XR_373893.2;XR_373894.2;NM_001290279.1;NM_001290280.1;XM_017319732.1	Gm10516;Gm30956;Rcor3;Rcor3;Rcor3;Rcor3;Rcor3;Rcor3;Rcor3;Rcor3;Rcor3;Rcor3;Rcor3;Rcor3	-898;-2060;0;0;0;0;0;0;0;0;0;0;0;0	17	17	0	5	5	0	50	38	12	40	23	17	43	27	16
chr1	195132001	195133000	1000	*	2.80014e-05	0.0113274	21.5801	Promoter (<=1kb)	1	195131701	195135514	3814	1	Gm32313	XR_865922.2	300	XM_006497226.1;XM_011238928.2;NM_013499.2;XM_017314176.1;NM_007758.2;XR_865893.1;XM_017314050.1;XM_006497225.2;XM_006497224.2;XM_006497221.2;XR_865919.1;XR_865920.2;XR_865918.2;XR_865921.2;XR_865922.2	Cr1l;Cr1l;Cr1l;Cr1l;Cr2;Cr2;Cr2;Cr2;Cr2;Cr2;Gm32313;Gm32313;Gm32313;Gm32313;Gm32313	-447;-548;-431;-411;43715;44190;35417;44183;44187;44190;0;0;0;0;0	21	21	0	33	32	1	30	30	0	35	16	19	20	17	3
chr2	3476001	3477000	1000	*	4.4261e-05	0.015576	-43.0054	Promoter (1-2kb)	2	3455815	3474986	19172	2	Suv39h2	NR_027509.1	-1015	XM_006497453.3;NM_022724.4;NR_027509.1	Dclre1c;Suv39h2;Suv39h2	51909;-1015;-1015	27	8	19	25	7	18	19	16	3	16	5	11	11	11	0
chr2	3712001	3713000	1000	*	2.13012e-05	0.00935907	38.7721	Promoter (<=1kb)	2	3713437	3782142	68706	1	Fam107b	XM_011238984.2	-437	XM_006497518.1;XM_011238984.2;NM_025626.4	Fam107b;Fam107b;Fam107b	0;-437;-458	25	12	13	31	19	12	30	10	20	14	0	14	28	4	24
chr2	5950001	5951000	1000	*	1.9182e-07	0.000261692	-37.7286	Promoter (<=1kb)	2	5951447	6007899	56453	1	Upf2	XM_006497488.3	-447	XM_006497488.3;XM_006497487.1;XM_006497486.1;XR_001783050.1;XM_006497485.3;NM_001081132.1	Upf2;Upf2;Upf2;Upf2;Upf2;Upf2	-447;-447;-447;-447;-457;-469	75	1	74	33	3	30	38	1	37	21	16	5	10	5	5
chr2	10081001	10082000	1000	*	8.37786e-12	5.51175e-08	-55.6665	Promoter (<=1kb)	2	10080613	10092701	12089	1	Kin	XM_006497366.3	388	NM_001112738.1;NM_020615.4;XM_006497310.2;XM_006497365.3;NM_025280.2;XM_006497366.3	Atp5c1;Atp5c1;Atp5c1;Kin;Kin;Kin	-491;-491;-483;0;0;0	35	2	33	64	15	49	11	8	3	16	8	8	25	22	3
chr2	16359001	16360000	1000	*	2.48241e-07	0.000319899	-28.4286	Promoter (2-3kb)	2	16356304	16755839	399536	1	Plxdc2	NM_026162.6	2697	XM_006497531.2;NM_026162.6	Plxdc2;Plxdc2	0;0	24	18	6	42	24	18	29	29	0	50	48	2	64	56	8
chr2	17732001	17733000	1000	*	1.57634e-07	0.000222962	-51.983	Promoter (<=1kb)	2	17346734	17731068	384335	2	Nebl	NM_028757.2	-933	NM_028757.2	Nebl	-933	15	3	12	33	10	23	12	8	4	20	14	6	19	18	1
chr2	18030001	18031000	1000	*	0.000114157	0.0290024	-39.8932	Promoter (2-3kb)	2	18027249	18030577	3329	1	Gm17762	NR_028378.1	2752	NR_028376.1;NR_028378.1;XR_001783238.1;XR_374024.2	A930004D18Rik;Gm17762;Gm33085;Gm33085	0;0;0;0	40	15	25	49	32	17	20	17	3	5	5	0	9	8	1
chr2	18649001	18650000	1000	*	1.66259e-07	0.000232531	-25.2827	Promoter (<=1kb)	2	18649064	18649361	298	2	LOC108167353	LOC108167353	0	XR_001783239.1;XR_001783240.1;LOC108167353	LOC102636124;LOC102636124;LOC108167353	-968;-968;0	101	40	61	148	84	64	150	100	50	39	28	11	83	68	15
chr2	20559001	20560000	1000	*	0.000231234	0.0449959	41.3935	Promoter (2-3kb)	2	20556668	20810524	253857	1	Etl4	XM_006497417.3	2333	XM_006497430.3;XM_006497408.3;XM_006497410.3;XM_006497414.2;XM_006497426.2;XM_006497427.2;XM_006497428.2;XM_017316831.1;NM_001081006.1;XM_011238967.2;NM_029895.4;NM_178059.5;NM_001177630.2;NM_001177631.1;XM_006497415.3;XM_006497419.2;XM_006497417.3	Etl4;Etl4;Etl4;Etl4;Etl4;Etl4;Etl4;Etl4;Etl4;Etl4;Etl4;Etl4;Etl4;Etl4;Etl4;Etl4;Etl4	0;0;0;0;0;0;0;0;0;0;0;0;0;0;0;0;0	15	15	0	16	15	1	5	1	4	18	17	1	25	13	12
chr2	21964001	21965000	1000	*	0.000107742	0.0279631	35.326	Promoter (<=1kb)	2	21878833	21964167	85335	2	Gm39767	XR_866004.1	0	XR_866004.1	Gm39767	0	34	20	14	10	7	3	49	12	37	46	15	31	63	19	44
chr2	23067001	23068000	1000	*	1.76275e-08	4.08043e-05	56.12	Promoter (<=1kb)	2	23067689	23114513	46825	1	Acbd5	XM_017319291.1	0	XM_017319291.1;XM_006498385.3;NM_001102436.1;NM_028793.3;XM_006498386.3;NM_001102437.1;NM_001102438.1;XM_006498387.1;XM_017319292.1;XM_011239202.1	Acbd5;Acbd5;Acbd5;Acbd5;Acbd5;Acbd5;Acbd5;Acbd5;Acbd5;Acbd5	0;0;-201;-201;-898;-1072;-1072;-1072;-1072;-1074	11	7	4	16	12	4	116	21	95	12	1	11	38	5	33
chr2	25214001	25215000	1000	*	2.82557e-05	0.0114026	-20.4996	Promoter (<=1kb)	2	25214719	25222280	7562	1	Fam166a	XM_006498268.3	0	XM_006498268.3;XM_006498270.3;XM_011239166.2;XM_006498265.2;XM_006498266.2;XM_006498267.2;XM_011239161.1;XM_011239162.1;XM_011239164.1;XM_011239165.1;NM_026624.3;XM_006498269.2;NM_001310157.1;NM_021393.3;XM_011239203.2;XM_006498394.3;NM_028961.1	Fam166a;Fam166a;Fam166a;Fam166a;Fam166a;Fam166a;Fam166a;Fam166a;Fam166a;Fam166a;Fam166a;Fam166a;Nelfb;Nelfb;Stpg3;Stpg3;Stpg3	0;0;0;0;0;0;0;0;0;0;-3745;-3932;-2512;-2512;0;0;0	52	34	18	73	30	43	60	41	19	58	47	11	135	97	38
chr2	28582001	28583000	1000	*	5.52305e-05	0.0180228	-30.2381	Promoter (<=1kb)	2	28566310	28582264	15955	2	Gtf3c5	XM_017319253.1	0	NM_001290484.1;NM_148928.3;XM_011239177.2;XM_017319253.1	Gtf3c5;Gtf3c5;Gtf3c5;Gtf3c5	0;0;-766;0	38	0	38	15	0	15	84	9	75	5	2	3	20	8	12
chr2	30180001	30181000	1000	*	7.02492e-05	0.0212105	-23.9927	Promoter (1-2kb)	2	30175033	30178495	3463	2	D2Wsu81e	XR_866012.2	-1506	NM_172660.4;XR_866012.2;XM_006498317.3;XM_006498318.1;XM_006498314.2;XM_006498315.2;NM_172404.2	D2Wsu81e;D2Wsu81e;Kyat1;Kyat1;Kyat1;Kyat1;Kyat1	-1542;-1506;7768;0;0;0;0	21	19	2	26	16	10	18	18	0	15	15	0	5	5	0
chr2	30204001	30205000	1000	*	2.86554e-05	0.0115082	-61.5385	Promoter (<=1kb)	2	30185131	30205699	20569	2	Kyat1	NM_172404.2	699	XR_374214.3;XM_006498318.1;XM_006498314.2;XM_006498315.2;NM_172404.2;XR_001783176.1;XR_001783175.1	Gm31201;Kyat1;Kyat1;Kyat1;Kyat1;Kyat1;Kyat1	-887;0;0;0;0;0;0	13	9	4	5	0	5	52	46	6	24	24	0	11	11	0
chr2	36796001	36797000	1000	*	6.34956e-05	0.0197682	-42.5197	Promoter (2-3kb)	2	36793238	36794176	939	1	Olfr50	NM_146946.1	2763	NM_146946.1	Olfr50	2763	7	3	4	18	9	9	17	16	1	11	8	3	17	17	0
chr2	37702001	37703000	1000	*	1.97308e-05	0.00883598	-28.4706	Promoter (<=1kb)	2	37569868	37703234	133367	2	Strbp	XM_011239046.2	234	XM_011239046.2;XM_011239043.2;XM_011239047.2;XR_001781603.1;XR_866009.2;XR_866010.2;XR_866011.2;XM_011239045.2	Strbp;Strbp;Strbp;Strbp;Strbp;Strbp;Strbp;Strbp	0;0;0;0;0;0;0;0	73	12	61	36	17	19	18	14	4	14	7	7	32	17	15
chr2	52674001	52675000	1000	*	3.40932e-10	1.40301e-06	26.0248	Promoter (<=1kb)	2	52428320	52675859	247540	2	Cacnb4	NM_001285428.1	859	NM_001285428.1;NM_001285426.1;NM_001037099.2;XM_006497641.3;XR_001783304.1	Cacnb4;Cacnb4;Cacnb4;Cacnb4;LOC108168755	0;0;0;0;-1827	46	20	26	21	14	7	28	2	26	5	4	1	53	0	53
chr2	59881001	59882000	1000	*	1.76104e-11	1.0738e-07	39.9457	Promoter (<=1kb)	2	59852364	59882495	30132	2	Wdsub1	XM_006500221.2	495	XM_006500221.2;NM_028118.2;XM_006500216.3;XM_006500217.3;XM_006500218.3;XM_006500219.3;XM_006500220.3;XM_006500222.3;XM_006500223.3;XM_011239784.2;XM_006500225.3;NM_001159636.1;XM_011239786.2;XM_006500224.3	Wdsub1;Wdsub1;Wdsub1;Wdsub1;Wdsub1;Wdsub1;Wdsub1;Wdsub1;Wdsub1;Wdsub1;Wdsub1;Wdsub1;Wdsub1;Wdsub1	0;0;0;0;0;0;0;0;0;0;0;0;0;0	17	2	15	36	31	5	43	3	40	16	0	16	10	2	8
chr2	60208001	60209000	1000	*	1.37462e-05	0.00680171	41.8765	Promoter (<=1kb)	2	59899363	60209855	310493	2	Baz2b	XM_011239661.2	855	XM_011239661.2;NM_020575.2	Baz2b;March7	0;-936	10	9	1	50	40	10	26	10	16	11	4	7	11	6	5
chr2	62048001	62049000	1000	*	8.20742e-07	0.000834088	-37.727	Promoter (1-2kb)	2	62046515	62326743	280229	1	Slc4a10	NM_033552.3	1486	NM_001242378.1;NM_001242379.1;NM_001242380.1;NM_001242381.1;NM_001242382.1;NM_001242383.1;NM_033552.3	Slc4a10;Slc4a10;Slc4a10;Slc4a10;Slc4a10;Slc4a10;Slc4a10	0;0;0;0;0;0;0	54	7	47	34	4	30	23	17	6	18	8	10	47	15	32
chr2	62412001	62413000	1000	*	1.10733e-10	5.4016e-07	53.5098	Promoter (<=1kb)	2	62330073	62412231	82159	2	Dpp4	NM_010074.3	0	NM_010074.3;NM_001159543.1;XM_006498691.3;XM_006498692.3;XM_011239274.2;XR_001780739.1	Dpp4;Dpp4;Dpp4;Dpp4;Dpp4;Dpp4	0;0;0;0;0;0	25	12	13	17	14	3	44	0	44	12	3	9	10	1	9
chr2	69821001	69822000	1000	*	1.30444e-05	0.0065345	-37.4074	Promoter (<=1kb)	2	69821918	69836087	14170	1	Klhl23	XM_006499678.3	0	XM_006499678.3;NM_177784.4;XM_006499677.1;XR_374475.1	Klhl23;Klhl23;Klhl23;Klhl23	0;-370;-693;-693	27	14	13	5	1	4	13	13	0	5	1	4	27	27	0
chr2	71054001	71055000	1000	*	9.98121e-06	0.00542896	-25.1791	Promoter (<=1kb)	2	70964561	71055606	91046	2	Mettl8	NM_145524.3	606	XM_006500339.3;XR_001783197.1;XR_866345.2;XR_374535.2;NM_001165982.1;NM_198005.2;NM_001165980.1;NM_001165981.1;XM_006499195.3;XR_001782094.1;NM_145524.3;XM_006499196.2	Dcaf17;Dcaf17;Dcaf17;Dcaf17;Dcaf17;Dcaf17;Dcaf17;Dcaf17;Mettl8;Mettl8;Mettl8;Mettl8	-742;-742;-742;-743;-744;-744;-744;-744;0;0;0;0	71	27	44	73	16	57	41	9	32	38	23	15	47	39	8
chr2	71211001	71212000	1000	*	0.000101809	0.0269001	-27.3174	Promoter (<=1kb)	2	71211685	71262974	51290	1	Dync1i2	XM_017315324.1	0	XM_017315324.1;XM_017315326.1;XM_017315319.1;NM_001198872.1;NM_001198873.1;NM_001198874.1;NM_001198875.1;NM_001198876.1;XM_006498680.3;XM_006498679.2;XM_006498674.2;XM_006498678.2;XM_006498676.1;XM_006498677.1;NM_001198877.1;NM_001198878.1;NM_010064.4	Dync1i2;Dync1i2;Dync1i2;Dync1i2;Dync1i2;Dync1i2;Dync1i2;Dync1i2;Dync1i2;Dync1i2;Dync1i2;Dync1i2;Dync1i2;Dync1i2;Dync1i2;Dync1i2;Dync1i2	0;0;0;0;0;0;0;0;0;0;0;0;0;0;0;0;0	38	11	27	39	34	5	60	54	6	18	17	1	53	38	15
chr2	72144001	72145000	1000	*	5.57056e-06	0.00353911	29.0192	Promoter (<=1kb)	2	72145200	72257472	112273	1	Rapgef4	XM_006499938.3	-200	NM_001204167.1;NM_001204165.1;NM_019688.2;NM_001204166.1;XM_017319138.1;XM_017319139.1;XM_006499938.3	Rapgef4;Rapgef4;Rapgef4;Rapgef4;Rapgef4;Rapgef4;Rapgef4	0;0;0;0;0;0;0	30	28	2	111	94	17	41	21	20	5	3	2	32	22	10
chr2	72813001	72814000	1000	*	5.82458e-08	0.000103855	35.6688	Promoter (<=1kb)	2	72745846	72813717	67872	2	6430710C18Rik	NR_102348.1	0	NR_102348.1;NR_102349.1	6430710C18Rik;6430710C18Rik	0;0	33	32	1	83	66	17	34	26	8	37	8	29	109	65	44
chr2	75062001	75063000	1000	*	9.60941e-06	0.00526543	27.2928	Promoter (<=1kb)	2	75061610	75086930	25321	1	LOC108168769	XR_001783335.1	391	XR_001783335.1	LOC108168769	0	28	27	1	16	16	0	93	64	29	19	15	4	20	13	7
chr2	75605001	75606000	1000	*	5.20271e-06	0.00335875	39.5385	Promoter (<=1kb)	2	75451974	75606038	154065	2	LOC108168771	XM_017319376.1	38	XM_017319376.1;XM_017319379.1;XM_017319378.1;XM_017319380.1;XM_017319377.1;XR_001783374.1;XR_001783375.1;XR_001783376.1;XR_001783377.1;XR_001783379.1	LOC108168771;LOC108168771;LOC108168771;LOC108168771;LOC108168771;LOC108168771;LOC108168771;LOC108168771;LOC108168771;LOC108168771	0;0;0;0;0;0;0;0;0;0	26	21	5	19	6	13	37	14	23	5	0	5	58	7	51
chr2	75775001	75776000	1000	*	0.000206798	0.0421794	27.7208	Promoter (<=1kb)	2	75776845	75791277	14433	1	Gm13657	XR_001783382.1	-845	XR_001783382.1;XR_866479.2;XR_001783381.1;XR_866480.1;XR_866481.2;XR_374734.2	Gm13657;Gm13657;Gm13657;Gm13657;Gm13657;Gm34657	0;0;-865;-866;-866;6170	18	16	2	13	10	3	10	6	4	18	15	3	36	8	28
chr2	76979001	76980000	1000	*	0.000222409	0.0439819	-34.743	Promoter (2-3kb)	2	76703984	76982547	278564	2	Ttn	NM_011652.3	2547	XM_011239438.1;XM_017317139.1;NM_011652.3;NM_028004.2	Ttn;Ttn;Ttn;Ttn	0;0;0;0	25	13	12	23	11	12	16	16	0	18	14	4	21	16	5
chr2	76980001	76981000	1000	*	6.4475e-08	0.000112916	38.3385	Promoter (1-2kb)	2	76703984	76982547	278564	2	Ttn	NM_011652.3	1547	XM_011239438.1;XM_017317139.1;NM_011652.3;NM_028004.2	Ttn;Ttn;Ttn;Ttn	0;0;0;0	34	27	7	22	16	6	16	10	6	28	5	23	67	22	45
chr2	79372001	79373000	1000	*	5.5092e-05	0.0180228	45.2781	Promoter (<=1kb)	2	79331216	79371146	39931	2	Cerkl	XM_017317604.1	-855	XM_017317607.1;XM_017317605.1;XM_017317604.1;XM_017317601.1;XM_017317599.1;XM_017317600.1;XM_017317602.1;XM_017317603.1;NM_001048176.1;XR_001782103.1;XR_866266.2	Cerkl;Cerkl;Cerkl;Cerkl;Cerkl;Cerkl;Cerkl;Cerkl;Cerkl;Cerkl;Cerkl	-2863;-2796;-855;0;0;0;0;0;0;0;0	29	23	6	27	20	7	5	1	4	12	4	8	22	9	13
chr2	80129001	80130000	1000	*	5.30903e-07	0.000585986	-37.7047	Promoter (<=1kb)	2	79834453	80129412	294960	2	Pde1a	NM_001159582.1	0	Gm13674;NM_016744.4;NM_001159582.1;XM_006498920.3;XM_006498921.3;XM_006498919.3;XM_011239356.2	Gm13674;Pde1a;Pde1a;Pde1a;Pde1a;Pde1a;Pde1a	-1899;-30;0;0;0;0;-157	37	7	30	30	6	24	37	24	13	19	9	10	27	16	11
chr2	80446001	80447000	1000	*	1.82025e-15	2.21982e-11	-27.7775	Promoter (<=1kb)	2	80411970	80447396	35427	2	Frzb	NM_011356.4	396	NM_011356.4	Frzb	0	111	0	111	93	3	90	53	8	45	52	12	40	48	24	24
chr2	80699001	80700000	1000	*	3.43987e-05	0.0130893	-38.3702	Promoter (<=1kb)	2	80699766	80727997	28232	1	Gm36282	XR_374750.2	0	XR_374750.2	Gm36282	0	37	3	34	6	3	3	5	5	0	11	3	8	12	9	3
chr2	85036001	85037000	1000	*	3.13808e-05	0.0122917	44.793	Promoter (<=1kb)	2	84996549	85037034	40486	2	P2rx3	XM_006499210.3	34	XM_017317611.1;XM_011239452.2;XM_011239453.2;XM_006499210.3;NM_145526.2;NM_182990.4;XM_011239405.1;XM_006499070.1;NM_001136081.2	P2rx3;P2rx3;P2rx3;P2rx3;P2rx3;Ssrp1;Ssrp1;Ssrp1;Ssrp1	-806;-760;-760;0;-167;-120;-125;-191;-451	27	16	11	17	12	5	15	0	15	15	2	13	17	8	9
chr2	87437001	87438000	1000	*	2.18533e-06	0.00176521	-31.9608	Promoter (2-3kb)	2	87434489	87435445	957	1	Olfr1124	NM_147028.2	2512	NM_147028.2	Olfr1124	2512	42	17	25	56	34	22	59	47	12	26	23	3	44	35	9
chr2	90625001	90626000	1000	*	3.91038e-05	0.014329	40.5571	Promoter (<=1kb)	2	90624573	90628397	3825	1	Gm39870	XR_866517.1	428	XR_866518.1;XR_866517.1	Gm39870;Gm39870	0;0	17	13	4	31	26	5	13	4	9	17	6	11	36	19	17
chr2	90680001	90681000	1000	*	1.03474e-05	0.00554936	-22.5922	Promoter (1-2kb)	2	90678411	90739327	60917	1	Nup160	XM_006499968.3	1590	NM_021512.2;XM_006499968.3	Nup160;Nup160	0;0	27	26	1	50	22	28	13	12	1	19	18	1	34	31	3
chr2	91181001	91182000	1000	*	3.89211e-05	0.0142777	34.0079	Promoter (1-2kb)	2	91137360	91183047	45688	2	Madd	NM_001177719.1	1047	NM_001177720.1;NM_001177719.1;NM_145527.4;XR_001782105.1;XR_001782106.1;XR_001782107.1;XM_017317620.1;XM_017317621.1;XM_017317623.1;XM_017317624.1;XM_017317627.1;XM_017317629.1;XM_017317630.1;XM_017317632.1;XM_017317619.1;XM_017317625.1;XM_017317628.1;XM_017317626.1;XM_017317634.1;NM_013839.4;NM_001177730.1;XM_006499167.2;XM_006499166.2;XM_006499168.3	Madd;Madd;Madd;Madd;Madd;Madd;Madd;Madd;Madd;Madd;Madd;Madd;Madd;Madd;Madd;Madd;Madd;Madd;Madd;Nr1h3;Nr1h3;Nr1h3;Nr1h3;Nr1h3	-1680;0;0;0;0;0;0;0;0;0;0;0;0;0;0;0;0;0;0;13035;13116;13124;13151;20829	7	5	2	36	35	1	21	17	4	10	2	8	18	9	9
chr2	91236001	91237000	1000	*	0.00024812	0.0469604	-37.598	Promoter (<=1kb)	2	91211579	91237066	25488	2	Ddb2	NM_028119.5	66	NR_015464.1;XM_006498547.3;XR_374383.3;NM_028119.5;XR_001780206.1	A330069E16Rik;Ddb2;Ddb2;Ddb2;Ddb2	-146;0;0;0;0	12	1	11	15	0	15	17	6	11	5	2	3	12	6	6
chr2	93821001	93822000	1000	*	1.69256e-05	0.00795377	43.2077	Promoter (<=1kb)	2	93695631	93822568	126938	2	Ext2	NM_010163.3	568	NM_010163.3;XM_006498733.3;XM_006498730.3;XM_006498731.3;XM_006498732.3	Ext2;Ext2;Ext2;Ext2;Ext2	0;-906;0;0;0	5	4	1	23	21	2	15	5	10	25	11	14	10	5	5
chr2	94011001	94012000	1000	*	0.000244047	0.0465562	20.9157	Promoter (<=1kb)	2	93994110	94010823	16714	2	Alkbh3	XM_006500125.2	-178	XM_006500123.3;XM_006500126.3;NM_026944.1;XM_006500125.2	Alkbh3;Alkbh3;Alkbh3;Alkbh3	-179;-179;-271;-178	45	17	28	103	38	65	27	7	20	15	1	14	84	14	70
chr2	101886001	101887000	1000	*	1.60663e-07	0.000225968	-27.1682	Promoter (<=1kb)	2	101886262	101901639	15378	1	Commd9	NM_029635.3	0	NM_029635.3;XM_006500238.3;XM_017319279.1	Commd9;Prr5l;Prr5l	0;-2927;-2927	58	1	57	20	0	20	33	3	30	20	15	5	5	0	5
chr2	103795001	103796000	1000	*	3.42043e-07	0.000414597	-66.6667	Promoter (1-2kb)	2	103765011	103797062	32052	2	Caprin1	XM_006499902.2	1062	NM_001111289.1;NM_001111290.1;NM_016739.3;XM_006499902.2;NM_001111292.1;NM_001111291.1;XR_866593.1;XR_866594.1;XR_866595.1;XR_866596.1	Caprin1;Caprin1;Caprin1;Caprin1;Caprin1;Caprin1;Gm39894;Gm39894;Gm39894;Gm39894	0;0;0;0;0;0;-1207;-1207;-1207;-1207	6	1	5	12	6	6	5	5	0	5	5	0	17	17	0
chr2	104709001	104710000	1000	*	2.44751e-08	5.33678e-05	-48.3044	Promoter (<=1kb)	2	104710258	104712768	2511	1	Gm6306	XM_017319383.1	-258	XM_017319383.1;XM_006499488.1;NM_001033768.2;XM_006499734.3;XM_006499735.3;NM_177190.5	Gm6306;Pin1rt1;Pin1rt1;Tcp11l1;Tcp11l1;Tcp11l1	-258;6362;6290;0;0;0	39	9	30	5	1	4	34	20	14	46	37	9	37	26	11
chr2	104888001	104889000	1000	*	1.83472e-07	0.000251332	24.9115	Promoter (1-2kb)	2	104886324	104999737	113414	1	Ccdc73	NM_177600.4	1677	NM_177600.4	Ccdc73	0	35	35	0	75	68	7	65	48	17	31	24	7	65	39	26
chr2	112261001	112262000	1000	*	8.4845e-05	0.0239293	34.6784	Promoter (<=1kb)	2	112261926	112262898	973	1	Nop10	NM_025403.4	0	NM_025403.4;NM_172521.1;XM_011239418.1;XM_006498545.3;NM_133649.2	Nop10;Nutm1;Nutm1;Slc12a6;Slc12a6	0;-1710;-1840;-4042;-4314	53	32	21	51	33	18	70	28	42	26	7	19	6	1	5
chr2	112534001	112535000	1000	*	0.000113954	0.0290024	-21.3554	Promoter (2-3kb)	2	112478733	112537470	58738	2	Chrm5	XM_006499099.3	2470	XR_001783190.1;NM_028844.3;XM_006499099.3	Aven;Aven;Chrm5	0;0;0	40	26	14	10	8	2	83	76	7	15	15	0	10	9	1
chr2	114854001	114855000	1000	*	2.93586e-05	0.0117388	-41.9048	Promoter (<=1kb)	2	114853815	115043938	190124	1	Gm13974	XR_866646.1	186	XR_374883.2;XR_866649.1;XR_866648.1;XR_866647.1;XR_866646.1	Gm13974;Gm13974;Gm13974;Gm13974;Gm13974	0;0;0;0;0	48	16	32	51	17	34	7	6	1	15	12	3	5	3	2
chr2	116899001	116900000	1000	*	6.5154e-05	0.0201279	-22.6618	Promoter (<=1kb)	2	116900152	116912791	12640	1	D330050G23Rik	NR_040335.1	-152	NR_040335.1;NR_040336.1;XR_001783443.1;XR_001783444.1	D330050G23Rik;D330050G23Rik;LOC108168786;LOC108168786	-152;-152;0;0	46	19	27	71	11	60	36	12	24	26	18	8	81	41	40
chr2	117439001	117440000	1000	*	5.66302e-06	0.00357966	32.6579	Promoter (<=1kb)	2	117439984	117450490	10507	1	Gm32137	XR_001783446.1	0	XR_001783446.1	Gm32137	0	44	14	30	35	15	20	14	1	13	29	2	27	13	0	13
chr2	118389001	118390000	1000	*	4.98016e-05	0.0167579	-22.1004	Promoter (<=1kb)	2	118389112	118475234	86123	1	Eif2ak4	NM_001177806.1	0	XM_017318909.1;XM_006499625.3;XM_006499626.3;XM_006499627.3;NM_013719.3;XM_017318915.1;NM_001177806.1	Eif2ak4;Eif2ak4;Eif2ak4;Eif2ak4;Eif2ak4;Eif2ak4;Eif2ak4	0;0;0;0;0;0;0	22	0	22	15	0	15	20	2	18	26	8	18	47	12	35
chr2	118599001	118600000	1000	*	5.09028e-10	2.028e-06	20.6484	Promoter (<=1kb)	2	118598211	118641592	43382	1	Bub1b	NM_009773.3	790	XM_006498622.3;NM_009773.3;Gm14016	Bub1b;Bub1b;Gm14016	0;0;4991	40	40	0	92	90	2	54	39	15	51	45	6	113	84	29
chr2	121169001	121170000	1000	*	0.000179533	0.0386259	36.7906	Promoter (1-2kb)	2	121158273	121171002	12730	2	Zscan29	XM_006500482.3	1002	NM_001290824.1;NM_153387.3;NR_077245.2;NR_110985.1;XM_006500482.3;NM_001290819.1;NM_001290820.1	Tubgcp4;Tubgcp4;Tubgcp4;Tubgcp4;Zscan29;Zscan29;Zscan29	-1168;-1168;-1168;-1168;0;0;0	14	13	1	13	3	10	17	3	14	5	2	3	17	1	16
chr2	122468001	122469000	1000	*	1.67319e-12	1.24865e-08	28.1712	Promoter (<=1kb)	2	122466583	122467797	1215	2	Bambi-ps1	NR_027919.1	-204	NR_027919.1	Bambi-ps1	-204	111	43	68	100	49	51	127	19	108	110	9	101	167	40	127
chr2	125859001	125860000	1000	*	2.7693e-09	8.84761e-06	52.7894	Promoter (<=1kb)	2	125830302	125859082	28781	2	Cops2	NM_001285507.1	0	NM_001285507.1;NM_001285512.1;NM_001285513.1;NM_009939.3;NM_175154.3;XM_006500153.3	Cops2;Cops2;Cops2;Cops2;Galk2;Galk2	0;0;0;0;0;0	10	8	2	22	11	11	103	6	97	20	1	19	31	8	23
chr2	128686001	128687000	1000	*	1.2978e-06	0.00117874	-23.321	Promoter (<=1kb)	2	128610083	128687395	77313	2	Anapc1	NM_008569.2	395	NM_008569.2;XM_011239332.2;XR_001783466.1;XR_001783464.1;XR_866730.2;XR_866728.2;XR_001783467.1;XR_001783465.1;XR_001783468.1	Anapc1;Anapc1;Gm39931;Gm39931;Gm39931;Gm39931;Gm39931;Gm39931;Gm39931	0;0;0;11778;11780;11782;11788;11792;11922	97	41	56	51	20	31	54	38	16	33	27	6	5	2	3
chr2	128687001	128688000	1000	*	2.62207e-06	0.00202789	33.5897	Promoter (<=1kb)	2	128610083	128687395	77313	2	Anapc1	NM_008569.2	0	NM_008569.2;XM_011239332.2;XR_001783466.1;XR_001783464.1;XR_866730.2;XR_866728.2;XR_001783467.1;XR_001783465.1;XR_001783468.1	Anapc1;Anapc1;Gm39931;Gm39931;Gm39931;Gm39931;Gm39931;Gm39931;Gm39931	0;0;0;10778;10780;10782;10788;10792;10922	6	1	5	13	7	6	40	2	38	6	0	6	46	0	46
chr2	130425001	130426000	1000	*	1.20067e-11	7.68766e-08	-58.2515	Promoter (<=1kb)	2	130417684	130424641	6958	2	Pced1a	NM_001114541.1	-360	XM_017318975.1;XM_017318973.1;XM_006499706.3;NM_178762.4;NM_001114541.1;XM_006499709.3;XM_006499707.3;XR_374544.3;XR_374543.3;XR_001783206.1;XM_006500430.3;XM_017319343.1;XR_374542.3;NM_030559.3;XM_017319344.1	Pced1a;Pced1a;Pced1a;Pced1a;Pced1a;Pced1a;Pced1a;Vps16;Vps16;Vps16;Vps16;Vps16;Vps16;Vps16;Vps16	-1499;-1060;-664;-713;-360;-664;-664;0;0;0;0;0;0;0;0	19	0	19	16	11	5	57	51	6	5	5	0	69	61	8
chr2	130905001	130906000	1000	*	3.04772e-06	0.00228636	-40	Promoter (<=1kb)	2	130872541	130906396	33856	2	A730017L22Rik	NR_015523.2	396	NR_015523.2;XM_006498606.3;NM_009730.2	A730017L22Rik;Atrn;Atrn	0;-447;-496	10	2	8	6	6	0	5	5	0	19	19	0	10	10	0
chr2	132248001	132249000	1000	*	4.49397e-09	1.30519e-05	68.3346	Promoter (<=1kb)	2	132239492	132248413	8922	2	Tmem230	XM_006500166.3	0	XR_375000.3;NM_011045.2;NM_001141971.1;NM_027478.3;XM_006500166.3	LOC102633666;Pcna;Tmem230;Tmem230;Tmem230	-4246;4180;-213;-213;0	17	14	3	5	5	0	24	5	19	26	2	24	5	2	3
chr2	132817001	132818000	1000	*	7.77333e-06	0.00450106	35.2788	Promoter (<=1kb)	2	132816146	132838867	22722	1	Mcm8	XM_006500021.3	855	NM_001291054.1;NM_025676.4;XR_374505.2;XM_006500021.3;XM_006500051.2;XM_006500052.2;NM_175113.3	Mcm8;Mcm8;Mcm8;Mcm8;Trmt6;Trmt6;Trmt6	0;0;0;0;-979;-946;-947	15	15	0	28	28	0	62	48	14	5	2	3	43	33	10
chr2	134803001	134804000	1000	*	6.79986e-06	0.00408052	-24.2342	Promoter (1-2kb)	2	134801659	134804544	2886	1	LOC102634483	XR_866762.2	1342	XR_866762.2;NM_001145830.1;NM_019677.2	LOC102634483;Plcb1;Plcb1	0;0;0	59	12	47	87	42	45	48	32	16	44	20	24	137	87	50
chr2	136714001	136715000	1000	*	1.49529e-07	0.000214225	44.9627	Promoter (<=1kb)	2	136533833	136714163	180331	2	Gm32659	XR_375013.2	0	XR_375013.2;XR_375014.3;XM_017316761.1;NM_001291056.1;NM_011428.3;XM_017316758.1;XM_017316760.1	Gm32659;Gm32659;Snap25;Snap25;Snap25;Snap25;Snap25	0;0;0;0;0;0;0	21	8	13	22	13	9	101	11	90	6	0	6	10	0	10
chr2	142576001	142577000	1000	*	0.000206801	0.0421794	28.796	Promoter (<=1kb)	2	142576842	142578054	1213	1	Rbmx2-ps	Rbmx2-ps	0	Rbmx2-ps	Rbmx2-ps	0	16	9	7	44	20	24	55	3	52	16	4	12	56	20	36
chr2	147011001	147012000	1000	*	6.53816e-06	0.0039794	59.5278	Promoter (<=1kb)	2	147012768	147055156	42389	1	Xrn2	XM_011239519.2	-768	XM_011239519.2;XM_006499450.3;NM_011917.2	Xrn2;Xrn2;Xrn2	-768;-1023;-1060	6	6	0	12	11	1	12	2	10	25	9	16	16	9	7
chr2	150609001	150610000	1000	*	7.04258e-09	1.91896e-05	-50.3307	Promoter (<=1kb)	2	150583661	150608558	24898	2	Apmap	XM_017319266.1	-443	NM_027977.2;XM_006500199.3;XM_017319266.1	Apmap;Apmap;Apmap	-478;-443;-443	42	6	36	45	6	39	13	8	5	8	6	2	34	19	15
chr2	153053001	153054000	1000	*	4.82659e-07	0.000541098	27.7941	Promoter (<=1kb)	2	153041344	153052799	11456	2	Gm32286	XR_375138.1	-202	XR_375138.1;XM_006499320.3;NM_001011732.1;XM_006499323.2;XM_006499321.3	Gm32286;Xkr7;Xkr7;Xkr7;Xkr7	-202;0;0;0;0	20	7	13	70	53	17	70	20	50	10	1	9	34	15	19
chr2	154612001	154613000	1000	*	0.000150472	0.0346463	27.186	Promoter (<=1kb)	2	154613133	154645705	32573	1	Zfp341	XR_374456.3	-133	XR_374456.3;NM_199304.1	Zfp341;Zfp341	-133;-368	33	13	20	46	20	26	31	6	25	23	1	22	21	4	17
chr2	157736001	157737000	1000	*	1.62192e-05	0.00770144	-37.6357	Promoter (<=1kb)	2	157737401	157891903	154503	1	Ctnnbl1	NM_025680.4	-401	NM_025680.4	Ctnnbl1	-401	31	16	15	26	11	15	30	25	5	12	11	1	33	26	7
chr2	164878001	164879000	1000	*	8.09147e-05	0.0231909	52.3016	Promoter (<=1kb)	2	164879368	164891437	12070	1	Pcif1	NM_146129.3	-368	XM_011239920.2;NM_146129.3;XM_011239495.1;XM_011239494.2	LOC105244413;Pcif1;Pcif1;Pcif1	0;-368;-571;-1011	14	12	2	10	7	3	12	2	10	5	3	2	5	0	5
chr2	165325001	165326000	1000	*	1.38482e-07	0.000201869	55.8556	Promoter (<=1kb)	2	165289137	165325992	36856	2	Elmo2	XM_017315487.1	0	NM_001302752.1;NM_080287.2;NM_207706.1;XM_011239284.1;XM_017315487.1	Elmo2;Elmo2;Elmo2;Elmo2;Elmo2	-4175;0;0;-4182;0	15	10	5	20	14	6	34	5	29	5	0	5	44	10	34
chr2	165387001	165388000	1000	*	1.08841e-07	0.000167706	57.3016	Promoter (<=1kb)	2	165377436	165388259	10824	2	Zfp334	NM_178411.3	259	XM_006499377.3;XM_011239500.1;NM_178411.3	Zfp334;Zfp334;Zfp334	0;0;0	28	28	0	21	20	1	5	2	3	10	0	10	21	17	4
chr2	166450001	166451000	1000	*	9.58082e-06	0.00525553	22.0042	Promoter (2-3kb)	2	166447451	166458770	11320	1	5031425F14Rik	NR_015558.3	2550	NR_015558.3	5031425F14Rik	0	46	42	4	27	25	2	33	27	6	85	61	24	80	45	35
chr2	167016001	167017000	1000	*	0.000131304	0.0317166	-67.5362	Promoter (<=1kb)	2	167015313	167034945	19633	1	Ddx27	NM_153065.3	688	XM_006499422.1;NM_153065.3	Ddx27;Ddx27	0;0	5	2	3	5	0	5	23	19	4	5	4	1	5	5	0
chr2	170186001	170187000	1000	*	1.02852e-05	0.00552946	50.2476	Promoter (<=1kb)	2	170177103	170186188	9086	2	Gm34403	XR_375320.2	0	XR_375320.2;XR_867037.1	Gm34403;Gm34403	0;0	6	6	0	12	11	1	18	4	14	43	17	26	12	9	3
chr2	172862001	172863000	1000	*	7.92037e-08	0.000131568	-46.7228	Promoter (1-2kb)	2	172848625	172864251	15627	2	Gm36254	XR_375353.3	1251	XR_867066.1;XR_867067.1;XR_375353.3;XR_375354.3;XR_375352.2	Gm36254;Gm36254;Gm36254;Gm36254;LOC102640035	-4717;-4717;0;0;0	59	10	49	38	16	22	55	33	22	32	22	10	5	5	0
chr2	173277001	173278000	1000	*	9.48338e-05	0.0258268	40.1954	Promoter (<=1kb)	2	173224465	173276533	52069	2	Pmepa1	NM_022995.3	-468	XM_006499991.3;NM_022995.3	Pmepa1;Pmepa1	-746;-468	20	16	4	35	34	1	15	11	4	10	0	10	39	28	11
chr3	8664001	8665000	1000	*	5.59805e-05	0.0181406	-23.092	Promoter (<=1kb)	3	8663359	8665885	2527	2	Hey1	XM_006530053.2	885	XM_006530053.2;NM_010423.2	Hey1;Hey1	0;0	73	45	28	108	71	37	16	15	1	58	44	14	54	49	5
chr3	19769001	19770000	1000	*	1.07748e-05	0.00572521	-37.5499	Promoter (<=1kb)	3	19768835	19769334	500	1	Gm7442	Gm7442	166	Gm7442	Gm7442	0	18	7	11	36	13	23	27	23	4	29	22	7	39	25	14
chr3	19881001	19882000	1000	*	0.000170649	0.0373885	-34.1126	Promoter (<=1kb)	3	19880872	19881746	875	2	LOC102633274	XR_001784054.1	0	XR_001784054.1	LOC102633274	0	10	0	10	42	8	34	66	27	39	40	14	26	40	22	18
chr3	26152001	26153000	1000	*	9.18281e-05	0.02529	-30.5439	Promoter (<=1kb)	3	25431841	26153307	721467	2	Nlgn1	NM_001163387.1	307	NM_001163387.1;XM_006535420.3;XM_017319496.1;XM_006535415.2;XM_017319494.1;XM_017319495.1;NM_138666.3;XM_006535424.3;XM_006535425.3;XM_006535418.3;XM_006535422.3;XM_011249667.2;XM_006535421.3;XM_006535423.3	Nlgn1;Nlgn1;Nlgn1;Nlgn1;Nlgn1;Nlgn1;Nlgn1;Nlgn1;Nlgn1;Nlgn1;Nlgn1;Nlgn1;Nlgn1;Nlgn1	0;0;0;0;0;0;0;0;0;0;0;0;0;0	15	0	15	53	5	48	31	10	21	11	5	6	57	16	41
chr3	30510001	30511000	1000	*	6.04807e-08	0.000106668	39.4498	Promoter (<=1kb)	3	29951296	30509783	558488	2	Mecom	XM_006535387.2	-218	XM_006535387.2;NM_021442.2	Mecom;Mecom	0;0	19	1	18	15	12	3	44	2	42	47	0	47	80	4	76
chr3	33143001	33144000	1000	*	6.05355e-05	0.0190956	24.8353	Promoter (<=1kb)	3	32947926	33143191	195266	2	Pex5l	NM_001163516.3	0	NM_001163516.3;XM_006535507.2;XM_006535508.2;XM_011249701.1;XM_006535506.3;XM_011249693.2;XM_011249694.2;XM_011249696.2;XM_011249697.2	Pex5l;Pex5l;Pex5l;Pex5l;Pex5l;Pex5l;Pex5l;Pex5l;Pex5l	0;0;0;0;0;0;0;0;0	103	70	33	91	16	75	28	2	26	15	4	11	5	1	4
chr3	33844001	33845000	1000	*	1.64006e-12	1.23313e-08	-59.6664	Promoter (<=1kb)	3	33810757	33844324	33568	2	Ccdc39	XR_001783715.1	0	XR_001783715.1;NM_026222.2;XM_006535499.3;XM_006535498.3;XM_017319641.1;XM_006535500.3;XM_006535502.3	Ccdc39;Ccdc39;Ccdc39;Ccdc39;Ccdc39;Ccdc39;Ccdc39	0;0;0;0;0;0;0	48	0	48	45	1	44	58	15	43	17	13	4	5	4	1
chr3	35999001	36000000	1000	*	8.48696e-06	0.00480576	-44.25	Promoter (<=1kb)	3	35999913	36008828	8916	1	Mccc1os	NR_029456.1	0	XR_001783756.1;XR_001783758.1;XR_001783757.1;NM_023644.4;NR_029456.1	Mccc1;Mccc1;Mccc1;Mccc1;Mccc1os	0;0;0;0;0	37	3	34	17	0	17	6	4	2	38	12	26	15	7	8
chr3	36053001	36054000	1000	*	8.54687e-09	2.24765e-05	-27.6195	Promoter (<=1kb)	3	36007247	36053547	46301	2	Ccdc144b	NM_178418.4	0	NM_178418.4	Ccdc144b	0	88	36	52	128	56	72	67	47	20	112	58	54	91	80	11
chr3	37614001	37615000	1000	*	2.53984e-05	0.0105607	-38.3558	Promoter (<=1kb)	3	37613913	37615276	1364	1	4930594O21Rik	NR_130163.1	88	NR_130162.1;NR_130161.1;NR_130163.1	4930594O21Rik;4930594O21Rik;4930594O21Rik	0;0;0	21	6	15	15	5	10	53	36	17	15	15	0	5	2	3
chr3	40950001	40951000	1000	*	0.000140278	0.0331114	26.2916	Promoter (<=1kb)	3	40950631	40977793	27163	1	Larp1b	NM_001040399.1	0	XR_001783821.1;XM_017319520.1;XM_017319523.1;XM_017319521.1;XM_017319522.1;XM_017319524.1;NM_001040399.1;XM_017319525.1;XM_017319526.1	LOC108168867;Larp1b;Larp1b;Larp1b;Larp1b;Larp1b;Larp1b;Larp1b;Larp1b	-138;0;0;0;0;0;0;0;0	21	0	21	20	12	8	173	17	156	77	1	76	5	0	5
chr3	43764001	43765000	1000	*	1.38527e-08	3.34607e-05	-22.2427	Promoter (<=1kb)	3	43764045	43764754	710	2	Gm29739	Gm29739	0	Gm29739	Gm29739	0	12	2	10	63	8	55	56	35	21	5	0	5	29	14	15
chr3	50598001	50599000	1000	*	0.000110132	0.0283744	-32.2917	Promoter (<=1kb)	3	50597993	50598501	509	2	LOC108168851	LOC108168851	0	XR_375474.2;LOC108168851	Gm6209;LOC108168851	0;0	12	5	7	32	30	2	31	31	0	10	10	0	10	10	0
chr3	52179001	52180000	1000	*	3.3744e-13	2.96e-09	-50.3921	Promoter (<=1kb)	3	52171081	52180125	9045	2	Gm30074	XR_867257.2	125	XR_867257.2;XR_375647.3	Gm30074;Gm30074	0;0	24	10	14	71	13	58	16	13	3	29	25	4	19	14	5
chr3	53042001	53043000	1000	*	1.17462e-09	4.19509e-06	33.7452	Promoter (<=1kb)	3	53041547	53261679	220133	1	Lhfp	NM_175386.3	454	NM_175386.3	Lhfp	0	43	26	17	99	59	40	37	8	29	61	19	42	92	24	68
chr3	53706001	53707000	1000	*	3.88414e-06	0.00274692	-24.8077	Promoter (2-3kb)	3	53703042	53735763	32722	1	Gm30735	XR_867291.1	2959	XR_375662.2;XR_867287.1;XR_867288.1;XR_867289.1;XR_867291.1	Gm30735;Gm30735;Gm30735;Gm30735;Gm30735	0;0;0;0;0	26	17	9	60	51	9	18	18	0	10	10	0	34	34	0
chr3	55111001	55112000	1000	*	5.81162e-08	0.000103855	37.19	Promoter (<=1kb)	3	55112074	55137322	25249	1	Spg20	XM_006501320.2	-74	XM_006501320.2;NM_001144988.1;NM_144895.2;NM_001144987.1	Spg20;Spg20;Spg20;Spg20	-74;-108;-108;-166	44	22	22	62	22	40	49	5	44	31	2	29	5	0	5
chr3	58164001	58165000	1000	*	1.75182e-05	0.00814852	35.4394	Promoter (<=1kb)	3	58141707	58163807	22101	2	1700007F19Rik	NR_040538.1	-194	NR_040538.1;XR_001783848.1;XR_001783849.1;XR_001783847.1;XR_001783850.1	1700007F19Rik;Gm40056;Gm40056;Gm40056;Gm40056	-194;0;0;0;0	15	14	1	12	9	3	25	7	18	11	2	9	5	5	0
chr3	58689001	58690000	1000	*	5.52082e-05	0.0180228	-70.1587	Promoter (2-3kb)	3	58674949	58692388	17440	2	Siah2	NM_009174.3	2388	NR_045167.1;NM_009174.3;XR_001783671.1	4930593A02Rik;Siah2;Siah2	-2589;0;0	5	1	4	7	2	5	6	5	1	5	5	0	6	6	0
chr3	59128001	59129000	1000	*	6.99238e-08	0.000119528	-20.4427	Promoter (1-2kb)	3	59114623	59130762	16140	2	P2ry14	NM_001008497.2	1762	XM_006501588.3;XM_006501585.3;NM_177855.3;XM_006501586.3;XM_006501587.3;XM_006501589.3;XM_006501590.3;XM_006501591.3;XM_006501592.3;XM_006501593.3;XM_017319618.1;XR_001783698.1;XR_375531.3;NM_001008497.2;NM_001287124.1;NM_133200.4;NM_001287122.1;NM_001287121.1;NM_001287123.1;NM_001287120.1;NM_001287119.1	Med12l;Med12l;Med12l;Med12l;Med12l;Med12l;Med12l;Med12l;Med12l;Med12l;Med12l;Med12l;Med12l;P2ry14;P2ry14;P2ry14;P2ry14;P2ry14;P2ry14;P2ry14;P2ry14	0;0;0;0;0;0;0;0;0;0;0;0;0;0;0;0;0;0;0;0;0	63	45	18	12	10	2	57	54	3	79	78	1	15	15	0
chr3	65495001	65496000	1000	*	0.000183463	0.039168	-26.2732	Promoter (<=1kb)	3	65494091	65495627	1537	2	Gm34780	XR_001783858.1	0	XR_001783858.1;XR_867346.2	Gm34780;Gm40066	0;0	38	21	17	20	16	4	70	60	10	5	5	0	25	24	1
chr3	69128001	69129000	1000	*	1.18421e-06	0.00110262	-42.3301	Promoter (<=1kb)	3	69072221	69127092	54872	2	Kpna4	NM_008467.4	-909	NR_126533.1;NM_008467.4	Gm1647;Kpna4	-2233;-909	6	1	5	25	3	22	31	17	14	15	5	10	33	27	6
chr3	78006001	78007000	1000	*	0.000207306	0.0422213	-20.4208	Promoter (<=1kb)	3	78006459	78006983	525	1	Gm6677	Gm6677	0	Gm6677	Gm6677	0	62	16	46	84	24	60	10	4	6	29	9	20	39	28	11
chr3	82109001	82110000	1000	*	3.02731e-10	1.26138e-06	25.7417	Promoter (2-3kb)	3	82106247	82106309	63	2	Mir7010	NR_105977.1	-2692	XM_006501843.3;XM_011240184.1;NM_021896.5;NR_105977.1;NA;NA	Gucy1a3;Gucy1a3;Gucy1a3;Mir7010;Mir7010;Mir7010	0;0;0;-2692;-2733;-2696	55	54	1	55	52	3	92	47	45	48	37	11	92	77	15
chr3	85573001	85574000	1000	*	2.48469e-06	0.00193965	40.5377	Promoter (<=1kb)	3	85529890	85573993	44104	2	Gm3740	XR_867407.2	0	XM_006501329.2;XM_006501331.2;XM_006501330.2;XR_375512.3;NM_144896.4;XM_011240080.2;XR_867407.2;XR_867406.2;XR_375773.3;XR_001783869.1	Gatb;Gatb;Gatb;Gatb;Gatb;Gatb;Gm3740;Gm3740;Gm3740;LOC108168876	-102;-102;-102;-102;-129;-1925;0;0;0;-3513	12	7	5	29	14	15	45	4	41	17	2	15	51	9	42
chr3	87770001	87771000	1000	*	0.000197339	0.040918	-27.5824	Promoter (<=1kb)	3	87749100	87769110	20011	2	Pear1	XM_006502146.3	-891	NM_001032413.1;NM_001032414.1;NM_001289600.1;NM_001289601.1;NM_028460.2;NM_152799.2;XM_006502146.3	Pear1;Pear1;Pear1;Pear1;Pear1;Pear1;Pear1	-1048;-1048;-1048;-1048;-1048;-1048;-891	35	6	29	39	15	24	26	22	4	15	3	12	13	8	5
chr3	88580001	88581000	1000	*	8.95916e-07	0.000894128	-29.0206	Promoter (<=1kb)	3	88579671	88588413	8743	1	Ssr2	NM_025448.3	330	XM_006501878.2;NM_025448.3	Ssr2;Ssr2	0;0	64	5	59	15	3	12	42	11	31	24	11	13	37	21	16
chr3	89229001	89230000	1000	*	1.54731e-06	0.00135255	25.6125	Promoter (<=1kb)	3	89229056	89233381	4326	1	Muc1	NM_013605.2	0	NR_030579.1;NA;NA;NM_013605.2;XR_867212.2;XR_375510.2;XR_375508.2;NM_013691.2;XM_006501295.1;XR_001783677.1;XM_011240072.2;XM_006501614.3;XM_006501613.2;XM_011240152.2;XM_006501616.2;XR_001783704.1;NR_121683.1;NM_001039466.1;XR_001783703.1;NM_183037.2;XM_006501615.2	Mir92b;Mir92b;Mir92b;Muc1;Thbs3;Thbs3;Thbs3;Thbs3;Thbs3;Thbs3;Thbs3;Trim46;Trim46;Trim46;Trim46;Trim46;Trim46;Trim46;Trim46;Trim46;Trim46	-1803;-1854;-1813;0;14189;14189;14189;13814;13771;12320;12202;15107;15265;15885;15892;15892;15013;15199;15892;15897;16154	44	40	4	58	51	7	66	32	34	49	32	17	76	59	17
chr3	94759001	94760000	1000	*	1.7847e-07	0.000246846	-32.2706	Promoter (<=1kb)	3	94720021	94758182	38162	2	Gm15264	Gm15264	-819	XM_006502062.3;NM_001037711.2;NM_001293727.1;XM_006502061.2;Gm15264	Cgn;Cgn;Cgn;Cgn;Gm15264	23740;26515;26515;27725;-819	61	23	38	46	19	27	31	23	8	30	18	12	53	43	10
chr3	95201001	95202000	1000	*	1.18937e-05	0.00614026	22.572	Promoter (2-3kb)	3	95183191	95204729	21539	2	Gabpb2	XM_006501253.3	2729	NM_029885.1;NM_172512.2;XM_006501253.3;XM_006501250.3;XM_006501251.3;XM_006501252.3;XM_011240058.2;XM_011240059.2;XM_011240060.2;XM_011240061.2;XM_017319515.1	Gabpb2;Gabpb2;Gabpb2;Gabpb2;Gabpb2;Gabpb2;Gabpb2;Gabpb2;Gabpb2;Gabpb2;Gabpb2	0;0;0;0;0;0;0;0;0;0;0	30	27	3	71	68	3	37	17	20	50	45	5	20	15	5
chr3	95856001	95857000	1000	*	4.27293e-07	0.000492273	21.3383	Promoter (<=1kb)	3	95830615	95856805	26191	2	Prpf3	XM_006502081.2	0	XM_006502081.2;XR_001783748.1;XR_001783749.1;XR_001783750.1;XR_375580.2;XR_375581.2;NM_027541.4;NM_001316751.1;XR_001783747.1;XM_006502080.3	Prpf3;Prpf3;Prpf3;Prpf3;Prpf3;Prpf3;Prpf3;Prpf3;Prpf3;Prpf3	0;0;0;0;0;0;-248;-119;0;0	61	18	43	76	20	56	76	3	73	16	1	15	84	8	76
chr3	96173001	96174000	1000	*	5.73876e-06	0.00361839	23.0516	Promoter (<=1kb)	3	96172506	96177564	5059	1	Sf3b4	NM_153053.4	495	XR_001783667.1;XR_375501.1;XM_006501153.1;NM_181409.3;XM_011240043.1;NM_153053.4	Mtmr11;Mtmr11;Mtmr11;Mtmr11;Mtmr11;Sf3b4	11055;11053;11043;11031;9880;0	26	5	21	55	49	6	44	14	30	53	22	31	20	4	16
chr3	96218001	96219000	1000	*	1.35608e-08	3.28349e-05	-55	Promoter (<=1kb)	3	96219916	96220353	438	1	Hist2h2ab	NM_178213.4	-916	NM_178213.4;NM_175662.2;NM_178214.4	Hist2h2ab;Hist2h2ac;Hist2h2be	-916;1880;-2072	5	3	2	20	6	14	7	7	0	10	10	0	11	11	0
chr3	96436001	96437000	1000	*	5.58677e-05	0.018133	-46.3688	Promoter (<=1kb)	3	96435972	96436043	72	1	n-THgtg2	rna18917	29	NM_001256180.1;NM_001256181.1;rna18917	BC107364;BC107364;n-THgtg2	0;0;0	59	12	47	56	6	50	10	7	3	6	5	1	34	11	23
chr3	100161001	100162000	1000	*	9.99084e-06	0.00542981	33.5997	Promoter (<=1kb)	3	100138180	100162393	24214	2	Wdr3	XM_006501542.2	393	NM_010269.3;NR_104341.1;XR_001783651.1;XM_006501001.2;XM_006501542.2;NM_175552.4	Gdap2;Gdap2;Gdap2;Gdap2;Wdr3;Wdr3	0;0;0;0;0;0	26	14	12	10	3	7	54	10	44	5	0	5	62	4	58
chr3	100163001	100164000	1000	*	0.000126697	0.031038	27.0153	Promoter (<=1kb)	3	100162544	100206983	44440	1	Gdap2	XM_006501001.2	457	NM_010269.3;NR_104341.1;XR_001783651.1;XM_006501001.2;XM_006501542.2;NM_175552.4	Gdap2;Gdap2;Gdap2;Gdap2;Wdr3;Wdr3	0;0;0;0;0;0	66	49	17	35	28	7	67	40	27	34	13	21	42	22	20
chr3	101669001	101670000	1000	*	0.000155546	0.0353111	20.4861	Promoter (1-2kb)	3	101659087	101667301	8215	2	Gm33265	XR_375916.2	-1700	XR_375916.2	Gm33265	-1700	26	26	0	20	20	0	36	27	9	15	10	5	32	31	1
chr3	102470001	102471000	1000	*	2.36441e-07	0.000308725	26.4073	Promoter (<=1kb)	3	102469919	102521013	51095	1	Ngf	NM_013609.3	82	NM_001112698.2;NM_013609.3	Ngf;Ngf	0;0	26	13	13	15	2	13	64	1	63	68	4	64	36	3	33
chr3	103124001	103125000	1000	*	9.76647e-05	0.0262539	-32.0991	Promoter (2-3kb)	3	103127556	103169738	42183	1	Dennd2c	NM_177857.1	-2556	XR_375532.3;XM_006501600.3;XM_006501605.3;XM_006501604.2;NM_177857.1;XM_017319624.1;XM_006501602.2	Dennd2c;Dennd2c;Dennd2c;Dennd2c;Dennd2c;Dennd2c;Dennd2c	0;0;0;0;-2556;-2636;-4806	32	25	7	44	20	24	12	11	1	6	6	0	20	18	2
chr3	107630001	107631000	1000	*	6.05522e-05	0.0190956	-22.1437	Promoter (<=1kb)	3	107612532	107631710	19179	2	Strip1	NM_153563.2	710	XR_375960.2;NM_153563.2	Gm10961;Strip1	-807;0	16	14	2	46	14	32	10	5	5	13	13	0	15	14	1
chr3	108383001	108384000	1000	*	0.000238583	0.0459451	-21.2588	Promoter (<=1kb)	3	108379277	108383741	4465	2	Gm12522	NR_040560.1	0	NR_040560.1;NM_026831.1;NM_001190161.1;NM_019976.3	Gm12522;Mybphl;Psrc1;Psrc1	0;18090;0;0	48	6	42	10	5	5	17	11	6	15	7	8	13	6	7
chr3	108655001	108656000	1000	*	7.10879e-09	1.92202e-05	-20.849	Promoter (<=1kb)	3	108654382	108676947	22566	1	Clcc1	XM_017319561.1	619	XR_001783688.1;NM_145543.2;XR_001783687.1;XM_006501416.3;NM_001177771.1;NM_001177770.1;XM_017319561.1	Clcc1;Clcc1;Clcc1;Clcc1;Clcc1;Clcc1;Clcc1	0;0;0;0;0;0;0	128	49	79	113	20	93	126	70	56	126	35	91	201	127	74
chr3	116006001	116007000	1000	*	4.80342e-06	0.00317573	20.92	Promoter (<=1kb)	3	115938973	116007406	68434	2	Slc30a7	NM_023214.7	406	XM_011240177.2;NM_001163515.1;NM_021388.4;XM_017319674.1;NM_001163514.1;NM_023214.7;XM_011240194.1	Extl2;Extl2;Extl2;Extl2;Extl2;Slc30a7;Slc30a7	-448;-449;-449;-1209;-1297;0;0	44	12	32	57	20	37	16	3	13	33	2	31	67	4	63
chr3	116965001	116966000	1000	*	8.63989e-05	0.024215	-39.7569	Promoter (2-3kb)	3	116968267	116984406	16140	1	4930455H04Rik	NR_040596.1	-2267	NR_040596.1;XR_375985.1;NM_023245.3	4930455H04Rik;Gm32148;Palmd	-2267;11891;0	16	10	6	32	15	17	12	10	2	11	11	0	5	5	0
chr3	117361001	117362000	1000	*	8.46182e-07	0.000852147	-29.1109	Promoter (<=1kb)	3	117319145	117360876	41732	2	Plppr4	NM_177664.5	-125	NM_177664.5	Plppr4	-125	52	29	23	57	35	22	54	41	13	33	32	1	51	46	5
chr3	118563001	118564000	1000	*	5.61079e-06	0.00355903	38.9107	Promoter (<=1kb)	3	118562178	119432918	870741	1	Dpyd	NM_170778.2	823	XM_011240318.2;NM_170778.2	Dpyd;Dpyd	0;0	13	8	5	84	38	46	40	12	28	7	0	7	67	9	58
chr3	119709001	119710000	1000	*	4.8283e-14	5.02948e-10	-24.3661	Promoter (<=1kb)	3	119709507	119709905	399	1	Gm4332	Gm4332	0	Gm4332	Gm4332	0	101	10	91	54	12	42	39	11	28	82	18	64	142	101	41
chr3	138726001	138727000	1000	*	1.7063e-05	0.00800326	-32.9574	Promoter (<=1kb)	3	138711535	138726984	15450	2	4930425O10Rik	NR_040545.1	0	NR_040545.1	4930425O10Rik	0	53	29	24	32	20	12	31	28	3	5	5	0	32	27	5
chr3	143566001	143567000	1000	*	6.64891e-06	0.00402964	-31.7994	Promoter (<=1kb)	3	143567044	143589171	22128	1	Gm33651	XR_376148.1	-44	XR_376148.1;XR_376149.1;XR_376150.1	Gm33651;Gm33651;Gm33651	-44;-44;-44	51	26	25	77	20	57	38	24	14	11	9	2	41	27	14
chr3	144208001	144209000	1000	*	1.71925e-19	3.1259e-15	-26.13	Promoter (2-3kb)	3	144188530	144205255	16726	2	Lmo4	NM_010723.3	-2746	NM_010723.3	Lmo4	-2746	134	14	120	190	61	129	126	86	40	20	1	19	58	40	18
chr3	148991001	148992000	1000	*	2.24056e-08	4.95699e-05	41.5876	Promoter (2-3kb)	3	148817902	148988730	170829	2	Adgrl2	XM_011240335.2	-2271	XM_006502423.3;XM_006502424.3;XM_006502425.3;XM_006502426.3;XM_006502427.3;XM_006502430.3;XM_006502433.3;XM_006502435.3;XM_006502436.3;XM_006502438.3;XM_006502442.3;XM_006502449.3;XM_006502450.3;XM_006502451.3;XM_006502462.3;XM_011240323.2;XM_011240325.2;XM_011240326.2;XM_011240327.2;XM_017319821.1;XM_017319822.1;XM_017319823.1;XM_017319830.1;XM_017319831.1;XM_017319833.1;XM_006502431.3;XM_006502…	Adgrl2;Adgrl2;Adgrl2;Adgrl2;Adgrl2;Adgrl2;Adgrl2;Adgrl2;Adgrl2;Adgrl2;Adgrl2;Adgrl2;Adgrl2;Adgrl2;Adgrl2;Adgrl2;Adgrl2;Adgrl2;Adgrl2;Adgrl2;Adgrl2;Adgrl2;Adgrl2;Adgrl2;Adgrl2;Adgrl2;Adgrl2;Adgrl2;Adgrl2;Adgrl2;Adgrl2;Adgrl2;Adgrl2;Adgrl2;Adgrl2;Adgrl2;Adgrl2;Adgrl2;Adgrl2;Adgrl2;Adgrl2;Adgrl2;Adgrl2;Gm30827	0;0;0;0;0;0;0;0;0;0;0;0;0;0;0;0;0;0;0;0;0;0;0;0;0;0;0;0;0;0;0;0;0;0;0;0;0;0;0;0;0;0;0;-4762	19	13	6	61	9	52	37	0	37	17	0	17	17	0	17
chr3	149088001	149089000	1000	*	2.31047e-05	0.00987345	23.9707	Promoter (<=1kb)	3	149088441	149095515	7075	1	Gm30575	XR_376235.3	0	XR_001784039.1;XR_001784035.1;XR_376235.3;XR_001784034.1;XR_001784036.1;XR_001784037.1;XR_001784038.1	Gm30575;Gm30575;Gm30575;Gm30575;Gm30575;Gm30575;Gm30575	0;0;0;0;0;0;0	47	14	33	57	12	45	27	0	27	23	1	22	5	0	5
chr3	152982001	152983000	1000	*	4.89326e-06	0.0032087	-61.3025	Promoter (<=1kb)	3	152820709	152982207	161499	2	St6galnac5	NM_012028.4	0	NM_012028.4	St6galnac5	0	31	15	16	5	0	5	32	26	6	10	8	2	21	20	1
chr3	155092001	155093000	1000	*	1.19787e-08	2.92878e-05	32.8132	Promoter (<=1kb)	3	155084915	155093363	8449	2	Fpgt	XM_011240268.2	363	XM_011240268.2;XM_006502233.2;NM_029330.2;NM_028938.2;XM_017319774.1;XM_006502190.3;XM_006502189.2	Fpgt;Fpgt;Fpgt;Lrriq3;Lrriq3;Lrriq3;Lrriq3	0;0;0;-434;-515;-515;-786	38	18	20	95	61	34	64	14	50	33	3	30	108	41	67
chr4	11077001	11078000	1000	*	4.61392e-05	0.0159983	-20.3121	Promoter (<=1kb)	4	11066650	11076246	9597	2	Ndufaf6	XM_011250130.2	-755	XM_006538358.2;XM_006538359.1;XM_006538360.3;XM_006538355.2;XM_006538356.2;NM_001085493.2;XM_006538357.3;XR_001784217.1;XM_011250130.2	Ndufaf6;Ndufaf6;Ndufaf6;Ndufaf6;Ndufaf6;Ndufaf6;Ndufaf6;Ndufaf6;Ndufaf6	-813;-813;-783;-758;-757;-796;-758;-755;-755	47	33	14	46	37	9	23	22	1	35	33	2	33	32	1
chr4	12090001	12091000	1000	*	1.29335e-06	0.00117685	38.0425	Promoter (<=1kb)	4	12039355	12090020	50666	2	Tmem67	XR_001784156.1	0	NM_198957.2;XM_011250133.1;XM_017320454.1;XM_017320453.1;NM_177861.4;NR_110955.1;XM_006538007.3;XR_001784156.1;XM_006538008.2	Rbm12b2;Rbm12b2;Rbm12b2;Rbm12b2;Tmem67;Tmem67;Tmem67;Tmem67;Tmem67	0;0;0;0;-2044;-1994;-548;0;-1994	11	8	3	21	13	8	78	10	68	18	0	18	16	12	4
chr4	12116001	12117000	1000	*	0.000190732	0.0400866	37.1297	Promoter (1-2kb)	4	12114084	12116438	2355	1	Gm11839	Gm11839	1917	Gm11839	Gm11839	0	6	6	0	7	7	0	25	14	11	51	22	29	19	17	2
chr4	12127001	12128000	1000	*	6.62957e-05	0.0203584	-29.878	Promoter (1-2kb)	4	12125090	12127449	2360	1	Gm11841	Gm11841	1911	Gm11841;LOC101056106	Gm11841;LOC101056106	0;5257	34	13	21	22	7	15	14	12	2	8	2	6	25	21	4
chr4	14825001	14826000	1000	*	6.87808e-06	0.00411368	-39.7757	Promoter (<=1kb)	4	14809505	14826587	17083	2	Otud6b	NM_152812.3	587	NM_152812.3	Otud6b	0	45	6	39	47	14	33	63	23	40	24	21	3	20	12	8
chr4	15093001	15094000	1000	*	1.98659e-05	0.00888456	60	Promoter (2-3kb)	4	15090169	15126648	36480	1	Gm36801	XR_390422.2	2832	XR_390422.2;NM_178617.4;XM_006538234.1	Gm36801;Necab1;Necab1	0;0;0	5	5	0	6	6	0	6	0	6	6	6	0	15	3	12
chr4	21775001	21776000	1000	*	1.35915e-06	0.00122116	-23.7062	Promoter (<=1kb)	4	21776215	21825077	48863	1	Usp45	XM_006538364.1	-215	XM_011250132.1;XM_006538364.1;XM_006538365.1;XM_006538362.1;NM_001290425.1;NM_152825.2;XM_006538361.3	Usp45;Usp45;Usp45;Usp45;Usp45;Usp45;Usp45	0;-215;-215;-216;-270;-270;-368	83	38	45	35	25	10	48	37	11	32	28	4	51	42	9
chr4	25307001	25308000	1000	*	6.68724e-05	0.0204848	29.5065	Promoter (<=1kb)	4	25307777	25309139	1363	1	Prdx6-ps2	Prdx6-ps2	0	Prdx6-ps2	Prdx6-ps2	0	33	30	3	45	33	12	23	18	5	16	5	11	60	29	31
chr4	25798001	25799000	1000	*	6.24614e-06	0.00385089	23.3118	Promoter (1-2kb)	4	25609333	25800003	190671	2	Fut9	NM_010243.3	1003	NM_010243.3	Fut9	0	33	13	20	75	17	58	50	0	50	44	7	37	69	5	64
chr4	31965001	31966000	1000	*	9.85342e-05	0.0263489	-34.7815	Promoter (<=1kb)	4	31964107	32023467	59361	1	Map3k7	NM_172688.3	894	XR_390323.3;NM_009316.1;NM_172688.3	Map3k7;Map3k7;Map3k7	0;0;0	35	6	29	25	22	3	20	18	2	5	5	0	68	49	19
chr4	40756001	40757000	1000	*	6.72737e-06	0.00404812	26.3087	Promoter (<=1kb)	4	40735649	40757885	22237	2	Smu1	NM_021535.4	885	NM_021535.4	Smu1	0	29	27	2	38	38	0	15	8	7	45	42	3	64	41	23
chr4	43874001	43875000	1000	*	1.40265e-06	0.00125125	-34.3791	Promoter (<=1kb)	4	43875530	43944806	69277	1	Reck	NM_016678.2	-530	NM_016678.2	Reck	-530	15	12	3	36	8	28	15	15	0	34	26	8	10	8	2
chr4	45823001	45824000	1000	*	7.93326e-07	0.000812834	36.3423	Promoter (<=1kb)	4	45822565	45887009	64445	1	Stra6l	XM_006538310.3	436	NM_018741.2;XM_006538310.3	Igfbpl1;Stra6l	0;0	15	15	0	46	43	3	12	7	5	10	8	2	21	9	12
chr4	48541001	48542000	1000	*	8.07493e-05	0.0231705	27.9502	Promoter (<=1kb)	4	48540551	48565892	25342	1	Msantd3	XM_006538187.2	450	XM_006538188.3;NM_001145925.1;XM_011250086.2;XM_011250087.2;NM_001145924.1;NM_028137.3;XM_006538187.2	Msantd3;Msantd3;Msantd3;Msantd3;Msantd3;Msantd3;Msantd3	0;0;0;0;0;0;0	63	33	30	69	38	31	25	5	20	34	6	28	63	25	38
chr4	49520001	49521000	1000	*	9.53391e-07	0.000933915	20.8809	Promoter (<=1kb)	4	49512597	49521083	8487	2	Mrpl50	NM_178603.4	83	NM_178603.4;NM_001289901.1;NM_145547.3	Mrpl50;Zfp189;Zfp189	0;-176;-176	44	18	26	25	14	11	193	15	178	40	21	19	98	22	76
chr4	56803001	56804000	1000	*	6.82699e-09	1.87555e-05	20.9867	Promoter (<=1kb)	4	56749680	56802331	52652	2	Ikbkap	NM_026079.3	-670	NM_001081420.1;XM_011250006.2;NM_026079.3;XR_390319.1	Fam206a;Fam206a;Ikbkap;Ikbkap	0;0;-670;-672	42	25	17	113	103	10	46	28	18	44	8	36	25	21	4
chr4	62359001	62360000	1000	*	8.28666e-06	0.00472325	-21.2454	Promoter (<=1kb)	4	62301206	62360542	59337	2	Fkbp15	XM_006538034.3	542	NM_001045528.1;XM_006538033.1;XM_006538034.3;XM_006537711.2;NM_175090.4	Fkbp15;Fkbp15;Fkbp15;Slc31a1;Slc31a1	0;0;0;-582;-701	13	12	1	39	18	21	12	12	0	7	5	2	23	23	0
chr4	62501001	62502000	1000	*	4.47341e-08	8.53704e-05	61.8736	Promoter (<=1kb)	4	62499054	62502200	3147	2	Hdhd3	NM_024257.1	200	NM_001276446.1;NM_008525.4;XM_006537676.3;NM_138653.1;NM_024257.1	Alad;Alad;Bspry;Bspry;Hdhd3	17909;18063;20997;20934;0	5	5	0	14	14	0	18	1	17	6	3	3	17	10	7
chr4	62965001	62966000	1000	*	1.98318e-20	4.04731e-16	34.313	Promoter (<=1kb)	4	62965555	63139709	174155	1	Zfp618	XM_006538286.1	0	XM_006538286.1;XM_006538288.1;NM_028326.1	Zfp618;Zfp618;Zfp618	0;0;0	194	72	122	238	75	163	34	0	34	29	0	29	57	0	57
chr4	73950001	73951000	1000	*	6.46605e-05	0.0200309	-21.5582	Promoter (<=1kb)	4	73939371	73950846	11476	2	2310002L09Rik	NM_027104.3	0	NM_027104.3;XR_390343.1;NM_027981.1	2310002L09Rik;2310002L09Rik;2310002L09Rik	0;0;0	64	39	25	53	37	16	63	55	8	19	16	3	28	25	3
chr4	86747001	86748000	1000	*	1.47157e-11	9.08378e-08	48.8117	Promoter (<=1kb)	4	86748398	86819949	71552	1	Dennd4c	XR_390327.3	-398	XR_390327.3;XM_006538022.2;XM_006538023.3;NM_184088.1;XR_881402.1;XR_881403.1	Dennd4c;Dennd4c;Dennd4c;Dennd4c;Gm42312;Gm42312	-398;-407;-407;-555;0;0	48	47	1	34	30	4	10	4	6	37	22	15	27	9	18
chr4	101507001	101508000	1000	*	4.22674e-06	0.00289847	-52.9275	Promoter (<=1kb)	4	101507976	101642799	134824	1	Dnajc6	NM_001164584.1	0	XM_006503421.3;NM_198412.2;NM_001164584.1;NM_001164585.1	Dnajc6;Dnajc6;Dnajc6;Dnajc6	0;0;0;0	25	11	14	10	0	10	46	39	7	15	6	9	10	10	0
chr4	101646001	101647000	1000	*	3.56833e-07	0.000428371	-64.8413	Promoter (<=1kb)	4	101647783	101659358	11576	1	Leprot	NM_175036.4	-783	XM_006503421.3;NM_198412.2;NM_001164584.1;NM_001164585.1;NM_001164583.1;XM_017320393.1;NM_175036.4	Dnajc6;Dnajc6;Dnajc6;Dnajc6;Dnajc6;Dnajc6;Leprot	0;0;0;0;95407;61267;-783	11	0	11	35	11	24	28	21	7	6	4	2	6	6	0
chr4	101985001	101986000	1000	*	9.50032e-05	0.0258421	-27.3353	Promoter (<=1kb)	4	101986840	101990231	3392	1	Gm12789	NM_001085520.2	-840	NM_001085520.2	Gm12789	-840	30	12	18	63	31	32	41	34	7	47	29	18	59	42	17
chr4	109230001	109231000	1000	*	0.000257581	0.0480795	-30.2495	Promoter (2-3kb)	4	109227463	109255134	27672	1	Calr4	XM_017319911.1	2538	NM_001285895.1;XM_017319911.1;NM_001285896.1;NM_001285897.1;NM_001285898.1;NM_001033226.4;XR_868003.1	Calr4;Calr4;Calr4;Calr4;Calr4;Calr4;Gm40225	0;0;0;0;0;0;0	18	12	6	37	26	11	26	25	1	5	5	0	5	5	0
chr4	109238001	109239000	1000	*	1.49517e-06	0.00131386	41.4153	Promoter (2-3kb)	4	109235632	109254577	18946	1	Calr4	NM_001033226.4	2369	NM_001285895.1;XM_017319911.1;NM_001285896.1;NM_001285897.1;NM_001285898.1;NM_001033226.4;XR_868003.1	Calr4;Calr4;Calr4;Calr4;Calr4;Calr4;Gm40225	0;0;0;0;0;0;0	6	6	0	17	15	2	78	22	56	12	5	7	17	15	2
chr4	110352001	110353000	1000	*	6.96638e-06	0.00415408	-22.4921	Promoter (<=1kb)	4	110204308	110351911	147604	2	Elavl4	XM_006502798.3	-90	NM_001163397.1;XM_006502798.3	Elavl4;Elavl4	-90;-90	116	22	94	66	7	59	82	34	48	54	2	52	45	30	15
chr4	113996001	113997000	1000	*	6.44391e-07	0.000685523	28.7651	Promoter (2-3kb)	4	113477891	113999503	521613	2	Skint5	NM_001167876.1	2503	XM_011240535.1;XM_011240536.1;NM_001167876.1;NM_001167878.1	Skint5;Skint5;Skint5;Skint5	0;0;0;0	94	67	27	29	14	15	31	6	25	22	7	15	43	18	25
chr4	117321001	117322000	1000	*	0.000219271	0.0435753	-23.6642	Promoter (1-2kb)	4	117311744	117319430	7687	2	Gm40231	XR_868035.1	-1571	XR_868035.1;NM_001310729.1;NM_025739.3;XM_017320355.1;XM_011240587.2;XM_011240588.1;XM_017320354.1;XM_006503285.1	Gm40231;Rnf220;Rnf220;Rnf220;Rnf220;Rnf220;Rnf220;Rnf220	-1571;0;0;0;0;0;0;0	20	11	9	16	15	1	18	18	0	17	16	1	16	16	0
chr4	119521001	119522000	1000	*	8.34596e-07	0.000844041	31.0944	Promoter (<=1kb)	4	119520863	119521528	666	1	Gm12957	Gm12957	138	Gm12956;Gm12957	Gm12956;Gm12957	-3273;0	102	50	52	48	37	11	107	34	73	31	1	30	23	14	9
chr4	123094001	123095000	1000	*	0.000247341	0.0469054	43.5491	Promoter (<=1kb)	4	123081209	123093771	12563	2	Gm12923	XR_868093.1	-230	XR_868093.1;XR_001784422.1	Gm12923;LOC108168975	-230;12850	38	32	6	45	39	6	7	0	7	17	9	8	33	24	9
chr4	125067001	125068000	1000	*	1.91461e-10	8.78259e-07	46.4608	Promoter (<=1kb)	4	125066693	125074043	7351	1	Snip1	NM_175246.4	308	NM_175223.4;XM_011240648.1;NM_175246.4	Dnali1;Snip1;Snip1	-1344;0;0	31	28	3	36	24	12	31	9	22	27	14	13	46	7	39
chr4	126665001	126666000	1000	*	0.000112775	0.0288348	20.5788	Promoter (<=1kb)	4	126665229	126666163	935	1	Gm12933	Gm12933	0	Gm12933	Gm12933	0	123	75	48	84	33	51	97	20	77	59	8	51	134	73	61
chr4	127620001	127621000	1000	*	7.28501e-07	0.00076203	-26.1449	Promoter (1-2kb)	4	127618745	127619853	1109	1	Gm40255	XR_868171.1	1256	XR_868171.1	Gm40255	1256	38	17	21	15	14	1	41	38	3	28	26	2	10	10	0
chr4	133133001	133134000	1000	*	0.000268823	0.049262	-30.0381	Promoter (2-3kb)	4	133130633	133198330	67698	1	Wasf2	NM_153423.6	2368	XM_006538849.3;XM_006538850.3;NM_153423.6	Wasf2;Wasf2;Wasf2	0;0;0	25	8	17	83	38	45	23	18	5	62	39	23	32	21	11
chr4	133174001	133175000	1000	*	0.000240227	0.0460646	-20.8491	Promoter (<=1kb)	4	133175987	133199723	23737	1	Wasf2	XM_006538848.3	-987	XM_006538849.3;XM_006538850.3;NM_153423.6;XM_006538848.3	Wasf2;Wasf2;Wasf2;Wasf2	0;0;0;-987	29	7	22	95	37	58	64	21	43	51	29	22	120	81	39
chr4	133632001	133633000	1000	*	2.47795e-06	0.0019359	-46.8561	Promoter (<=1kb)	4	133606992	133633429	26438	2	Zdhhc18	NM_001017968.2	429	XM_017320305.1;XM_006539018.1;XM_011250299.2;XR_390767.2;XM_006539020.1;XM_006539021.1;XM_006539022.1;NM_001017968.2	Zdhhc18;Zdhhc18;Zdhhc18;Zdhhc18;Zdhhc18;Zdhhc18;Zdhhc18;Zdhhc18	0;0;0;0;0;0;0;0	40	11	29	33	4	29	6	4	2	15	9	6	15	11	4
chr4	139379001	139380000	1000	*	1.76943e-05	0.00820699	-46.8379	Promoter (<=1kb)	4	139380659	139489533	108875	1	Ubr4	NM_001160319.1	-659	NM_001039200.2;NM_146157.4;NM_001160319.1	Emc1;Emc1;Ubr4	26414;26414;-659	11	5	6	23	14	9	5	5	0	12	12	0	5	5	0
chr4	140326001	140327000	1000	*	1.68607e-05	0.00793073	-54.0852	Promoter (2-3kb)	4	140323445	140330523	7079	1	Gm33895	XR_390890.3	2556	XR_390889.3;XR_001784472.1;XR_001784473.1;XR_001784474.1;XR_001784475.1;XR_001784476.1;XR_390890.3	Gm33895;Gm33895;Gm33895;Gm33895;Gm33895;Gm33895;Gm33895	2556;0;0;0;0;0;0	5	0	5	38	13	25	12	7	5	21	20	1	20	12	8
chr4	145195001	145196000	1000	*	7.95642e-08	0.000131729	-38.6905	Promoter (<=1kb)	4	144904717	145195029	290313	2	Vps13d	XR_001784134.1	0	XR_001784134.1;XR_881423.2;XR_881424.2;NM_001276502.1;NM_001276465.1;XM_006538804.3;XM_006538805.3;XM_011250235.2;XR_390739.3;XR_881427.2;XM_006538806.3;XM_017320174.1	Vps13d;Vps13d;Vps13d;Vps13d;Vps13d;Vps13d;Vps13d;Vps13d;Vps13d;Vps13d;Vps13d;Vps13d	0;0;0;-4335;0;0;0;0;0;0;0;0	5	5	0	35	5	30	6	6	0	5	5	0	8	7	1
chr4	146066001	146067000	1000	*	3.63227e-09	1.09406e-05	27.7121	Promoter (<=1kb)	4	146067524	146068718	1195	1	Gm13034	NR_030771.1	-524	NR_030771.1	Gm13034	-524	87	43	44	85	58	27	150	44	106	63	17	46	54	20	34
chr4	148212001	148213000	1000	*	2.05402e-06	0.00168719	22.2798	Promoter (1-2kb)	4	148208113	148214764	6652	2	Gm32603	XR_390951.1	1764	XR_390951.1	Gm32603	0	60	44	16	65	59	6	10	6	4	56	43	13	87	37	50
chr4	149701001	149702000	1000	*	4.4559e-05	0.0156176	45.4545	Promoter (<=1kb)	4	149649168	149701624	52457	2	Pik3cd	XM_006538643.2	0	XM_006538642.3;XM_017320037.1;NM_001164049.1;NM_001164050.1;NM_008840.3;XM_006538643.2;NM_001029837.2;XM_006538646.1	Pik3cd;Pik3cd;Pik3cd;Pik3cd;Pik3cd;Pik3cd;Pik3cd;Pik3cd	-2310;-2310;-2293;-2293;-2293;0;0;0	6	2	4	11	10	1	5	1	4	16	0	16	10	3	7
chr4	149793001	149794000	1000	*	0.000114256	0.0290024	45.5556	Promoter (2-3kb)	4	149790691	149802529	11839	1	Gm42354	XR_881588.1	2310	XR_881588.1	Gm42354	0	5	5	0	8	8	0	16	8	8	5	4	1	12	4	8
chr4	153799001	153800000	1000	*	1.09863e-14	1.20729e-10	-26.8253	Promoter (2-3kb)	4	153798547	153802226	3680	2	Gm31239	XR_391003.2	2226	XR_391003.2	Gm31239	0	105	37	68	103	101	2	86	82	4	90	86	4	124	111	13
chr5	5662001	5663000	1000	*	5.99207e-05	0.0189503	22.8345	Promoter (<=1kb)	5	5579278	5663661	84384	2	Cfap69	XM_006503560.3	661	XM_006503560.3;XM_006503561.2;XR_001784646.1;NM_172447.2;XM_006503564.1;XM_006503563.2;XR_001784766.1;XR_868231.2;NM_001103156.2;NM_001103157.2;NM_001285470.1;NM_001285471.1;NM_001285469.1;NM_028734.5;XM_006503609.3	Cfap69;Cfap69;Cfap69;Cfap69;Cfap69;Cfap69;Gm40262;Gm40262;Steap2;Steap2;Steap2;Steap2;Steap2;Steap2;Steap2	0;0;0;0;0;0;-1289;-1289;31089;31089;31089;31089;31326;31568;31364	20	18	2	19	17	2	36	14	22	5	4	1	11	9	2
chr5	8421001	8422000	1000	*	1.41252e-06	0.0012567	-40.9107	Promoter (<=1kb)	5	8396969	8422716	25748	2	Dbf4	NM_001190717.1	716	NM_001190717.1;NM_013726.3;XM_011240670.2;XM_006503592.3;XM_017320923.1;NM_001289595.1;NM_001289596.1;NM_178766.5;XM_006503591.3	Dbf4;Dbf4;Dbf4;Slc25a40;Slc25a40;Slc25a40;Slc25a40;Slc25a40;Slc25a40	0;0;0;-820;-820;-838;-838;-838;-858	43	25	18	35	6	29	53	42	11	18	18	0	39	22	17
chr5	9099001	9100000	1000	*	7.21815e-05	0.021569	26.0458	Promoter (<=1kb)	5	9100737	9118983	18247	1	Tmem243	NM_001081029.1	-737	NM_001081029.1	Tmem243	-737	52	37	15	35	18	17	51	15	36	37	9	28	50	26	24
chr5	9260001	9261000	1000	*	1.26579e-05	0.0064226	55.5489	Promoter (<=1kb)	5	9260672	9261395	724	2	Gm7332	Gm7332	395	Gm7332	Gm7332	0	7	7	0	40	32	8	22	13	9	5	0	5	61	27	34
chr5	24524001	24525000	1000	*	3.06382e-07	0.000382023	-22.4195	Promoter (1-2kb)	5	24504426	24526848	22423	2	Gbx1	NM_015739.2	1848	NM_015739.2	Gbx1	0	82	54	28	70	51	19	77	69	8	46	46	0	70	60	10
chr5	25769001	25770000	1000	*	7.38284e-06	0.00431782	-21.2901	Promoter (1-2kb)	5	25767701	25777312	9612	1	Gm42237	XR_880897.1	1300	XM_006535713.3;NM_001004365.2;NM_001310504.1;XR_880897.1;XR_001784825.1	Actr3b;Actr3b;Actr3b;Gm42237;Gm42237	0;0;0;0;-2064	32	4	28	44	5	39	47	22	25	33	0	33	70	37	33
chr5	30072001	30073000	1000	*	1.16264e-07	0.000177232	-26.1029	Promoter (<=1kb)	5	30058175	30071702	13528	2	Tyms	XM_017320801.1	-299	XR_001784663.1;XM_011249762.2;XM_017320801.1;NM_021288.4;NR_033402.1	Tyms;Tyms;Tyms;Tyms;Tyms	-299;-299;-299;0;0	109	29	80	37	26	11	47	34	13	13	11	2	39	26	13
chr5	31290001	31291000	1000	*	1.31437e-06	0.00119163	30.8472	Promoter (<=1kb)	5	31253279	31291114	37836	2	Ift172	NM_026298.5	114	XM_006504044.2;XM_011240762.2;NM_022424.5;NM_026298.5	Fndc4;Fndc4;Fndc4;Ift172	4954;4956;4877;0	11	4	7	52	21	31	5	0	5	31	7	24	55	0	55
chr5	34168001	34169000	1000	*	0.000153118	0.0349585	24.5941	Promoter (<=1kb)	5	34153896	34169424	15529	2	Haus3	NM_146159.1	424	NM_146159.1;NM_001289803.1;NM_001289804.1;NM_181857.4	Haus3;Poln;Poln;Poln	0;0;0;0	47	32	15	80	31	49	79	24	55	64	15	49	49	16	33
chr5	36486001	36487000	1000	*	3.28427e-06	0.00241893	-65.1282	Promoter (1-2kb)	5	36484588	36488171	3584	1	Ccdc96	NM_025725.2	1413	NM_025725.2;NM_001170454.1;NM_001113364.1;XM_006503645.1;NM_133910.3;XR_376793.2;NM_001113362.1;XM_006503642.3;XM_006503641.3;XM_006503640.3;XM_006503647.3;XM_006503644.3	Ccdc96;Tada2b;Tbc1d14;Tbc1d14;Tbc1d14;Tbc1d14;Tbc1d14;Tbc1d14;Tbc1d14;Tbc1d14;Tbc1d14;Tbc1d14	0;-1716;43623;44597;95397;95423;99226;89969;94848;99271;43799;66622	31	0	31	52	12	40	6	6	0	5	5	0	10	3	7
chr5	43868001	43869000	1000	*	0.000219532	0.0436014	20.2575	Promoter (<=1kb)	5	43868809	43912374	43566	1	Cd38	NM_007646.5	0	NM_007646.5	Cd38	0	14	13	1	27	22	5	34	13	21	5	5	0	8	5	3
chr5	45492001	45493000	1000	*	4.0674e-06	0.00283245	35.0446	Promoter (<=1kb)	5	45493374	45512691	19318	1	Lap3	NM_024434.6	-374	NM_024434.6	Lap3	-374	32	11	21	34	17	17	23	0	23	17	0	17	28	6	22
chr5	48598001	48599000	1000	*	4.93927e-05	0.0166769	24.0693	Promoter (<=1kb)	5	48389503	48599682	210180	2	Kcnip4	NM_001199245.1	682	NM_001199245.1;NM_030265.3;NM_001199244.1;NM_001199242.1;NM_001199243.1;XM_017321178.1	Kcnip4;Kcnip4;Kcnip4;Kcnip4;Kcnip4;Kcnip4	0;0;0;0;0;0	32	32	0	16	16	0	46	43	3	12	8	4	34	23	11
chr5	52131001	52132000	1000	*	1.51059e-07	0.00021549	-28.1778	Promoter (2-3kb)	5	52128818	52138873	10056	1	Gm40302	XR_868418.2	2183	XR_868417.2;XR_868418.2;NR_105845.1;NA	Gm40302;Gm40302;Mir6417;Mir6417	0;0;4017;3993	72	38	34	97	39	58	40	36	4	47	27	20	64	49	15
chr5	64092001	64093000	1000	*	1.21093e-07	0.000182095	27.9928	Promoter (<=1kb)	5	64092831	64116293	23463	1	Pgm1	XM_006504056.2	0	XM_006504056.2;NM_025700.2;XM_006504057.3	Pgm1;Pgm1;Pgm1	0;0;0	41	13	28	89	55	34	43	7	36	5	2	3	15	0	15
chr5	64231001	64232000	1000	*	1.75902e-06	0.00149196	34.4048	Promoter (<=1kb)	5	64230357	64351486	121130	1	Tbc1d1	NM_001289514.1	644	XM_011240758.2;XM_011240757.2;XM_006504037.3;XM_006504040.3;XM_006504036.3;NM_001310611.1;NM_019636.3;XM_006504038.3;NM_001289514.1	Tbc1d1;Tbc1d1;Tbc1d1;Tbc1d1;Tbc1d1;Tbc1d1;Tbc1d1;Tbc1d1;Tbc1d1	0;0;0;0;0;0;0;0;0	63	57	6	16	12	4	15	8	7	18	5	13	36	23	13
chr5	65130001	65131000	1000	*	1.7544e-07	0.000243328	-40.8163	Promoter (<=1kb)	5	65130961	65155190	24230	1	Klhl5	XM_006504135.3	0	XM_006504133.2;XM_006504135.3;XM_006504136.3;NM_175174.4	Klhl5;Klhl5;Klhl5;Klhl5	0;0;0;-231	21	15	6	49	23	26	8	8	0	11	11	0	9	9	0
chr5	71094001	71095000	1000	*	2.47149e-06	0.00193387	44.1697	Promoter (<=1kb)	5	70959997	71095508	135512	2	Gabra2	XM_006503733.3	508	XM_006503733.3;NM_008066.3	Gabra2;Gabra2	0;0	11	10	1	53	37	16	5	4	1	10	0	10	28	8	20
chr5	72558001	72559000	1000	*	1.435e-05	0.00702742	34.549	Promoter (<=1kb)	5	72513304	72559645	46342	2	Nfxl1	NM_133921.2	645	XR_001784872.1;XM_011240686.1;XR_376794.3;NM_133921.2	LOC108169048;Nfxl1;Nfxl1;Nfxl1	-4267;0;0;0	15	7	8	17	17	0	25	6	19	5	3	2	68	22	46
chr5	73405001	73406000	1000	*	1.61944e-07	0.000227449	-40.501	Promoter (<=1kb)	5	73406048	73442410	36363	1	Cwh43	XM_017320839.1	-48	XM_017320839.1;XM_006503949.2;XM_006503950.3;XM_017320840.1;NM_181323.2	Cwh43;Cwh43;Cwh43;Cwh43;Cwh43	-48;-49;-50;-50;-78	40	5	35	44	5	39	41	12	29	6	4	2	44	27	17
chr5	74534001	74535000	1000	*	1.08239e-05	0.00574559	-52.3007	Promoter (<=1kb)	5	74535353	74598790	63438	1	Fip1l1	XM_006504265.3	-353	XM_006504265.3;XM_006504264.3;XM_006504267.3;XM_006504266.3;NM_001159573.1;NM_001159574.1;NM_024183.5;NM_001114660.2;NM_001286437.1;NM_178672.7	Fip1l1;Fip1l1;Fip1l1;Fip1l1;Fip1l1;Fip1l1;Fip1l1;Scfd2;Scfd2;Scfd2	-353;-356;-356;-359;-482;-482;-482;-2259;-2259;-2259	25	8	17	63	35	28	17	15	2	5	5	0	5	5	0
chr5	77933001	77934000	1000	*	4.28137e-08	8.26519e-05	-31.3132	Promoter (<=1kb)	5	77933788	77949023	15236	1	Gm34912	XR_389314.2	0	XR_389314.2	Gm34912	0	41	1	40	45	5	40	20	8	12	17	2	15	32	20	12
chr5	86518001	86519000	1000	*	3.8001e-05	0.0140235	-30.7476	Promoter (<=1kb)	5	86485877	86518600	32724	2	Tmprss11g	NM_177162.4	0	NM_178730.3;XM_006534929.2;NM_177162.4	Tmprss11f;Tmprss11f;Tmprss11g	113424;73535;0	55	29	26	66	45	21	61	51	10	12	12	0	10	9	1
chr5	98973001	98974000	1000	*	5.80449e-08	0.000103855	-32.7586	Promoter (1-2kb)	5	98931268	98971957	40690	2	Prkg2	XM_006534821.2	-1044	NM_008926.4;XM_006534821.2;XM_006534820.3	Prkg2;Prkg2;Prkg2	0;0;0	29	10	19	12	12	0	26	26	0	5	5	0	5	5	0
chr5	99613001	99614000	1000	*	1.24604e-05	0.00637362	26.0307	Promoter (2-3kb)	5	99616824	99628487	11664	1	LOC102638465	XR_880464.1	-2824	NR_030692.1;XR_880464.1;XR_880465.1	A930011G23Rik;LOC102638465;LOC102638465	0;-2824;-2836	18	18	0	28	19	9	37	10	27	5	5	0	15	7	8
chr5	101242001	101243000	1000	*	0.000110915	0.0285046	21.2879	Promoter (2-3kb)	5	101236288	101239684	3397	2	Gm36851	XR_001784906.1	-2317	XR_880482.1;XR_389420.1;XR_389421.1;XR_389424.1;XR_389423.1;XR_001784904.1;XR_001784905.1;XR_001784906.1	Gm36851;Gm36851;Gm36851;Gm36851;Gm36851;Gm36851;Gm36851;Gm36851	-2317;-2317;-2317;-2317;-2317;-2317;-2317;-2317	14	14	0	21	21	0	40	29	11	11	11	0	11	7	4
chr5	103691001	103692000	1000	*	2.43052e-10	1.06283e-06	-27.7375	Promoter (<=1kb)	5	103692333	103855322	162990	1	Aff1	XM_006534801.3	-333	XM_006534801.3	Aff1	0	75	47	28	129	23	106	47	34	13	40	28	12	99	61	38
chr5	104983001	104984000	1000	*	6.1816e-06	0.00382537	-23.0363	Promoter (<=1kb)	5	104966247	104982811	16565	2	Abcg3	XM_017320906.1	-190	XM_017320904.1;NM_030239.2;XM_017320905.1;XM_017320906.1;Gm5870	Abcg3;Abcg3;Abcg3;Abcg3;Gm5870	-197;-284;-196;-190;5392	72	29	43	55	19	36	49	30	19	25	11	14	67	51	16
chr5	108661001	108662000	1000	*	2.08194e-05	0.00920256	-27.2059	Promoter (<=1kb)	5	108652422	108660827	8406	2	Dgkq	XM_011249397.1	-174	NM_199011.1;XM_011249392.1;XM_017320603.1;XR_001784588.1;XR_001784589.1;XR_001784590.1;XR_001784591.1;XR_001784592.1;XM_006534726.3;XM_011249397.1;NM_008325.4;NM_172997.1	Dgkq;Dgkq;Dgkq;Dgkq;Dgkq;Dgkq;Dgkq;Dgkq;Dgkq;Dgkq;Idua;Idua	-232;-174;-174;-174;-174;-174;-174;-174;-174;-174;0;0	30	15	15	12	11	1	15	15	0	7	7	0	17	16	1
chr5	110177001	110178000	1000	*	3.23381e-07	0.000396858	23.0435	Promoter (<=1kb)	5	110177070	110226470	49401	1	Golga3	XM_006534962.3	0	NR_040430.1;NR_040431.1;XM_006534960.3;XM_006534961.3;NM_008146.3;XM_006534962.3	Gm15787;Gm15787;Golga3;Golga3;Golga3;Golga3	-497;-497;0;0;0;0	40	12	28	50	13	37	75	3	72	44	0	44	46	5	41
chr5	110978001	110979000	1000	*	6.08978e-07	0.000654815	60.3951	Promoter (<=1kb)	5	110978310	111288870	310561	1	Ttc28	XM_006534846.3	0	XM_006534844.3;XM_006534845.3;NM_001267622.1;XM_006534846.3	Ttc28;Ttc28;Ttc28;Ttc28	0;0;0;0	25	16	9	12	12	0	10	0	10	54	16	38	54	19	35
chr5	112259001	112260000	1000	*	7.57791e-05	0.0222586	22.751	Promoter (2-3kb)	5	112256923	112269582	12660	1	Crybb1	XM_006534754.3	2078	XM_006534749.3;XM_006534753.3;XM_006534756.2;XM_006534757.2;NM_001312893.1;NM_001312894.1;NM_001312895.1;NM_023695.3;XM_006534752.2;XM_006534755.3;XM_006534754.3	Cryba4;Crybb1;Crybb1;Crybb1;Crybb1;Crybb1;Crybb1;Crybb1;Crybb1;Crybb1;Crybb1	0;0;0;0;0;0;0;0;0;0;0	22	21	1	26	26	0	13	11	2	26	23	3	27	14	13
chr5	114312001	114313000	1000	*	7.17436e-05	0.0215059	-27.505	Promoter (1-2kb)	5	114314941	114364576	49636	1	Myo1h	NM_001164573.1	-1941	XM_011248195.2;NM_001164573.1	Myo1h;Myo1h	0;-1941	27	8	19	23	10	13	6	3	3	39	26	13	49	37	12
chr5	114596001	114597000	1000	*	3.51011e-05	0.0132808	-35	Promoter (1-2kb)	5	114591136	114594334	3199	2	Gm34844	XR_001784944.1	-1667	NM_001004180.1;XM_006530401.3;XR_001784944.1;XR_387593.3	Fam222a;Fam222a;Gm34844;Gm34844	0;0;-1667;0	5	5	0	10	3	7	12	12	0	5	5	0	10	10	0
chr5	115273001	115274000	1000	*	2.32911e-07	0.000305658	-42.062	Promoter (<=1kb)	5	115241770	115272895	31126	2	Rnf10	NM_016698.2	-106	XM_017320970.1;NM_001302448.1;NM_001302449.1;NM_016698.2	Rnf10;Rnf10;Rnf10;Rnf10	-436;-106;-106;-106	39	5	34	36	2	34	32	14	18	5	3	2	26	13	13
chr5	116631001	116632000	1000	*	5.10607e-08	9.46938e-05	-49.2161	Promoter (1-2kb)	5	116632481	116633605	1125	2	Gstm2-ps1	Gstm2-ps1	1605	Gstm2-ps1	Gstm2-ps1	1605	31	9	22	5	3	2	10	10	0	9	8	1	13	12	1
chr5	117044001	117045000	1000	*	0.000260461	0.0483679	22.5197	Promoter (<=1kb)	5	117043694	117059591	15898	1	Gm7478	Gm7478	307	Gm7478	Gm7478	0	83	48	35	39	24	15	78	25	53	75	20	55	108	57	51
chr5	117046001	117047000	1000	*	1.82903e-21	4.06451e-17	-39.8484	Promoter (2-3kb)	5	117043694	117059591	15898	1	Gm7478	Gm7478	2307	Gm7478	Gm7478	0	82	7	75	67	7	60	22	9	13	52	24	28	146	89	57
chr5	118246001	118247000	1000	*	0.000225097	0.0442842	-27.3421	Promoter (<=1kb)	5	118245227	118263114	17888	1	2410131K14Rik	NM_001081236.1	774	NM_001081236.1;XM_006530346.3;XM_006530347.2;XM_017320901.1;XM_006530345.2;XM_006530348.2;XM_006530349.2;XM_006530344.1;NM_172998.3;NM_001109902.1;XM_006530350.1;XR_878686.2	2410131K14Rik;Rnft2;Rnft2;Rnft2;Rnft2;Rnft2;Rnft2;Rnft2;Rnft2;Rnft2;Rnft2;Rnft2	0;-1044;-948;-948;-931;-931;-931;-890;-1140;-976;-890;-890	64	15	49	37	14	23	33	15	18	22	18	4	30	14	16
chr5	120909001	120910000	1000	*	0.000132957	0.0318995	23.4848	Promoter (1-2kb)	5	120896719	120907544	10826	2	Oas1a	XR_001784699.1	-1457	NM_145211.2;XM_006530330.3;XR_001784699.1;NM_133893.3	Oas1a;Oas1a;Oas1a;Oas1d	-1476;-1457;-1457;-4818	33	32	1	31	31	0	10	4	6	20	17	3	5	5	0
chr5	121895001	121896000	1000	*	7.86994e-06	0.00453599	25.6995	Promoter (<=1kb)	5	121857962	121896345	38384	2	Cux2	XM_017320655.1	345	XM_017320655.1;XM_011248174.1;XM_011248176.2;XM_011248172.2;XM_011248170.2;XM_011248169.2;XM_011248168.2;XM_011248171.2;XM_011248167.1;XM_011248173.1;XM_006530157.3;XM_011248166.2;XM_011248164.2;NM_007804.2;NM_001312908.1	Cux2;Cux2;Cux2;Cux2;Cux2;Cux2;Cux2;Cux2;Cux2;Cux2;Cux2;Cux2;Cux2;Cux2;Cux2	0;0;0;0;0;0;0;0;0;0;0;0;0;0;0	25	21	4	53	52	1	10	8	2	21	9	12	56	41	15
chr5	122275001	122276000	1000	*	5.90634e-06	0.00369561	-43.6752	Promoter (<=1kb)	5	122275323	122279719	4397	1	1700112N08Rik	XR_878753.1	0	XR_878753.1;XR_387693.3;XR_878754.1	1700112N08Rik;1700112N08Rik;1700112N08Rik	0;0;0	15	0	15	20	0	20	65	18	47	15	3	12	6	5	1
chr5	122898001	122899000	1000	*	6.02024e-06	0.00375327	-47.3061	Promoter (1-2kb)	5	122870668	122900350	29683	2	Kdm2b	NM_013910.2	1350	XM_011248217.2;XM_011248216.1;XM_011248213.2;XM_011248214.2;XM_011248215.2;XM_011248209.2;XM_011248211.2;XM_006530376.3;XM_011248208.2;XM_011248210.2;XM_011248212.2;NM_013910.2;NM_001003953.2	Kdm2b;Kdm2b;Kdm2b;Kdm2b;Kdm2b;Kdm2b;Kdm2b;Kdm2b;Kdm2b;Kdm2b;Kdm2b;Kdm2b;Kdm2b	0;0;0;0;0;0;0;0;0;0;0;0;0	52	14	38	20	0	20	6	4	2	22	14	8	25	13	12
chr5	123719001	123720000	1000	*	9.12572e-07	0.000904432	60.1589	Promoter (1-2kb)	5	123699763	123721013	21251	2	Zcchc8	XM_006530457.1	1013	NM_027494.3;XM_006530457.1	Zcchc8;Zcchc8	0;0	72	37	35	5	5	0	43	6	37	49	16	33	18	0	18
chr5	124096001	124097000	1000	*	8.29921e-07	0.000840852	-41.8182	Promoter (<=1kb)	5	124061857	124095967	34111	2	Abcb9	XR_001784728.1	-34	NM_019875.2;XR_001784728.1	Abcb9;Abcb9	-203;-34	22	8	14	15	11	4	20	20	0	5	5	0	30	27	3
chr5	126694001	126695000	1000	*	4.5816e-06	0.00307716	-29.2746	Promoter (<=1kb)	5	126694279	126702724	8446	1	Gm33239	XR_868528.2	0	XR_868528.2;XR_377073.2	Gm33239;Gm33239	0;-3705	30	19	11	70	36	34	43	35	8	10	9	1	35	31	4
chr5	129846001	129847000	1000	*	0.000106292	0.0277208	-40.4348	Promoter (<=1kb)	5	129846990	129863951	16962	1	Sumf2	NM_026445.2	0	NM_009838.2;NM_026445.2;XM_006504491.1	Cct6a;Sumf2;Sumf2	0;0;0	46	18	28	5	2	3	12	12	0	5	5	0	5	2	3
chr5	131089001	131090000	1000	*	4.7949e-06	0.00317573	23.0644	Promoter (2-3kb)	5	131086078	131088807	2730	1	Gm40338	XR_001784987.1	2923	XR_868570.1;XR_001784987.1;NM_145218.3	Gm40338;Gm40338;Wbscr17	4324;2923;0	20	18	2	80	74	6	22	16	6	38	32	6	42	20	22
chr5	134184001	134185000	1000	*	1.73762e-05	0.00809326	-41.8182	Promoter (<=1kb)	5	134184019	134218146	34128	1	Gtf2ird2	XM_006504344.3	0	XM_006504344.3;XM_006504345.3;NM_053266.1	Gtf2ird2;Gtf2ird2;Gtf2ird2	0;0;0	10	0	10	19	0	19	11	5	6	5	0	5	5	4	1
chr5	135777001	135778000	1000	*	0.000102169	0.0269718	-29.5996	Promoter (<=1kb)	5	135747220	135778301	31082	2	Styxl1	NM_001289554.1	301	XR_001784990.1;XR_001784992.1;XR_868593.2;XR_001784991.1;NM_008617.2;NM_001289554.1;NM_001289555.1;NM_001289556.1;NM_001289557.1;NM_029659.4;XM_006504511.2;XM_006504519.2;XM_017321143.1;XM_017321152.1;XM_017321144.1;XM_017321145.1;XM_017321146.1;XM_017321147.1;XM_017321148.1;XM_017321149.1;XM_017321150.1;XM_017321151.1;XM_017321153.1;XR_377116.2	LOC105244798;LOC105244798;LOC105244798;LOC105244798;Mdh2;Styxl1;Styxl1;Styxl1;Styxl1;Styxl1;Styxl1;Styxl1;Styxl1;Styxl1;Styxl1;Styxl1;Styxl1;Styxl1;Styxl1;Styxl1;Styxl1;Styxl1;Styxl1;Styxl1	0;0;0;0;-649;0;0;0;0;0;-4238;-4238;-4238;-4238;0;0;0;0;0;0;0;0;0;-4238	23	7	16	49	23	26	43	34	9	5	3	2	38	25	13
chr5	137503001	137504000	1000	*	3.53247e-08	7.06494e-05	68.3122	Promoter (<=1kb)	5	137501439	137502429	991	2	Pop7	NM_028753.2	-572	NM_028753.2	Pop7	-572	16	13	3	6	6	0	29	5	24	15	2	13	11	4	7
chr5	137602001	137603000	1000	*	1.56539e-07	0.000222356	34.8038	Promoter (<=1kb)	5	137601219	137602208	990	1	Gm7285	XR_140756.5	782	XR_140756.5;NM_001254762.1;XM_006504612.1;NM_030037.2;XM_006504614.3;XM_006504613.3;XM_006504558.3;NM_008788.2	Gm7285;Mospd3;Mospd3;Mospd3;Mospd3;Mospd3;Pcolce;Pcolce	0;-1293;-947;-942;-921;-917;8764;8404	51	33	18	69	41	28	27	4	23	50	27	23	54	7	47
chr5	137742001	137743000	1000	*	1.25236e-05	0.00638306	-32.7106	Promoter (<=1kb)	5	137730882	137741607	10726	2	Nyap1	XM_006504575.2	-394	XM_006504575.2;NM_175521.3;XM_006504576.3;XM_006504577.3;NM_023910.6;NM_029805.1	Nyap1;Nyap1;Nyap1;Nyap1;Tsc22d4;Tsc22d4	-394;-2003;-962;-962;-2969;-2969	39	12	27	21	19	2	15	12	3	17	17	0	5	5	0
chr5	143625001	143626000	1000	*	0.000102796	0.02708	20.3475	Promoter (2-3kb)	5	143622452	143710250	87799	1	Cyth3	XM_017320729.1	2549	NM_011182.4;XM_017320729.1	Cyth3;Cyth3	0;0	6	3	3	29	26	3	46	22	24	22	15	7	37	12	25
chr5	144040001	144041000	1000	*	0.000187927	0.039714	-33.1004	Promoter (<=1kb)	5	144020109	144041233	21125	2	Ocm	XM_011241005.2	233	NM_033039.3;XM_011241005.2;XM_011241003.1;XM_011241004.1	Ocm;Ocm;Ocm;Ocm	0;0;0;0	18	1	17	31	6	25	5	1	4	20	10	10	12	8	4
chr5	144099001	144100000	1000	*	6.61704e-05	0.0203289	-23.7508	Promoter (<=1kb)	5	144100371	144188204	87834	1	Lmtk2	XM_006504825.3	-371	XM_006504825.3;NM_001081109.1	Lmtk2;Lmtk2	-371;-436	38	2	36	20	0	20	49	8	41	38	19	19	39	5	34
chr5	144356001	144357000	1000	*	9.81622e-05	0.0262958	33.4897	Promoter (<=1kb)	5	144357923	144361005	3083	1	Dmrt1i	NR_102374.1	-923	NM_025833.3;XR_377192.3;NR_102374.1;NR_102372.1;NR_102373.1	Baiap2l1;Bri3;Dmrt1i;Dmrt1i;Dmrt1i	0;0;-923;-1525;-1525	38	33	5	72	34	38	45	16	29	19	2	17	11	6	5
chr5	148552001	148553000	1000	*	1.25479e-24	3.69056e-20	24.2056	Promoter (<=1kb)	5	148504631	148552788	48158	2	Ubl3	NM_011908.2	0	NM_011908.2;XM_006504832.3	Ubl3;Ubl3	0;0	492	88	404	229	128	101	524	49	475	212	55	157	326	9	317
chr5	150521001	150522000	1000	*	2.43838e-06	0.00191395	49.5821	Promoter (<=1kb)	5	150522021	150548785	26765	1	Brca2	XR_377265.2	-21	XR_377265.2;XR_001784600.1;XM_017320629.1;XM_006504906.3;XM_017320628.1;XM_006504907.3;XM_011241019.2;NM_001081001.2;NM_009765.3;XM_011241020.2;NM_001159693.1;XM_011241026.2;XM_017321003.1	Brca2;Brca2;Brca2;Brca2;Brca2;Brca2;Brca2;Brca2;Brca2;Brca2;Zar1l;Zar1l;Zar1l	-21;-30;-56;-61;-61;-62;-62;-621;-621;-1212;-2842;-2807;-2807	48	42	6	5	4	1	17	4	13	5	1	4	39	23	16
chr6	5977001	5978000	1000	*	7.47545e-10	2.82093e-06	-25.7948	Promoter (<=1kb)	6	5963897	5977393	13497	2	1700019G24Rik	NR_040255.1	0	NR_040255.1;XM_006504982.3;NM_001191023.1;NM_001191025.1;NM_001191026.1;NM_001191027.1;NM_010063.4;XM_017321380.1	1700019G24Rik;Dync1i1;Dync1i1;Dync1i1;Dync1i1;Dync1i1;Dync1i1;Dync1i1	0;0;0;0;0;0;0;0	75	16	59	84	19	65	71	35	36	36	11	25	104	66	38
chr6	7843001	7844000	1000	*	0.000255183	0.0477693	36.8974	Promoter (1-2kb)	6	7845224	7872042	26819	1	C1galt1	NM_052993.3	-1224	NM_052993.3	C1galt1	0	13	10	3	30	7	23	39	3	36	5	1	4	25	3	22
chr6	11927001	11928000	1000	*	0.000155477	0.0353037	24.0977	Promoter (1-2kb)	6	11925881	12081198	155318	1	Phf14	NM_001168382.1	1120	XM_006505197.3;XM_006505202.3;XM_017321819.1;XM_017321821.1;XR_001785183.1;XM_006505196.3;XM_006505199.3;XR_377294.3;XM_006505198.3;XR_377293.3;XM_011241085.2;XM_006505200.3;XM_006505201.3;XM_017321820.1;NM_029404.3;NM_001168382.1	Phf14;Phf14;Phf14;Phf14;Phf14;Phf14;Phf14;Phf14;Phf14;Phf14;Phf14;Phf14;Phf14;Phf14;Phf14;Phf14	0;0;0;0;0;0;0;0;0;0;0;0;0;0;0;0	22	15	7	36	31	5	41	14	27	20	15	5	18	9	9
chr6	15184001	15185000	1000	*	0.000179733	0.0386605	33.0475	Promoter (<=1kb)	6	15185506	15441977	256472	1	Foxp2	NM_001286607.1	-506	NM_053242.4;XM_017321341.1;NM_001286607.1;NM_212435.1	Foxp2;Foxp2;Foxp2;Foxp2	0;0;-506;-506	18	10	8	22	8	14	23	4	19	18	1	17	57	9	48
chr6	25929001	25930000	1000	*	2.18215e-06	0.00176407	24.197	Promoter (1-2kb)	6	25931426	25977227	45802	1	Gm20756	NR_040771.1	-1426	NR_040771.1	Gm20756	-1426	35	35	0	44	44	0	19	15	4	15	9	6	52	46	6
chr6	29059001	29060000	1000	*	4.23592e-06	0.00289847	36.6581	Promoter (<=1kb)	6	29060195	29073877	13683	1	Lep	XM_006504999.1	-195	XM_006504999.1;NM_008493.3	Lep;Lep	-195;-221	12	8	4	39	33	6	16	5	11	31	9	22	30	17	13
chr6	29271001	29272000	1000	*	5.86723e-12	3.96434e-08	22.7537	Promoter (<=1kb)	6	29272488	29275449	2962	1	Hilpda	NM_001190461.1	-488	XM_011241060.2;NM_001190461.1;NM_023516.5	Fam71f2;Hilpda;Hilpda	-3800;-488;-626	33	6	27	84	56	28	10	3	7	75	14	61	87	9	78
chr6	30549001	30550000	1000	*	9.97576e-05	0.0265242	22.351	Promoter (<=1kb)	6	30547637	30550738	3102	2	LOC108169136	XR_001785204.1	738	NM_001024698.2;XM_011241057.1;XR_001785204.1;XR_001785203.1	Cpa2;Cpa2;LOC108169136;LOC108169136	0;0;0;0	30	27	3	38	34	4	82	60	22	26	18	8	82	49	33
chr6	34177001	34178000	1000	*	1.65402e-06	0.00142192	57.6653	Promoter (<=1kb)	6	34177168	34179377	2210	1	Gm13855	XR_868963.2	0	XR_868963.2;XM_011241421.2;NM_021435.3	Gm13855;Slc35b4;Slc35b4	0;0;0	6	4	2	19	11	8	65	9	56	5	0	5	10	0	10
chr6	40324001	40325000	1000	*	0.000159765	0.0359297	-30.2381	Promoter (<=1kb)	6	40325155	40397562	72408	1	Agk	XM_006506571.2	-155	XM_006506571.2;XM_011241458.1;NM_023538.2	Agk;Agk;Agk	0;0;0	20	15	5	20	3	17	16	16	0	5	2	3	14	12	2
chr6	40441001	40442000	1000	*	0.00012229	0.030195	21.5625	Promoter (<=1kb)	6	40442863	40466815	23953	1	Wee2	NM_201370.2	-863	XM_006506138.3;NM_175528.4;XM_006506326.3;XM_006506327.3;NM_201370.2	E330009J07Rik;E330009J07Rik;Wee2;Wee2;Wee2	-4507;-4868;0;0;-863	43	39	4	65	62	3	24	14	10	50	46	4	39	25	14
chr6	40940001	40941000	1000	*	0.000176389	0.0381795	-23.2898	Promoter (<=1kb)	6	40920437	40940967	20531	2	1700074P13Rik	XM_006506690.3	0	XM_006506690.3;NM_028550.3;XM_017321778.1;XM_017321779.1;XM_017321780.1;XM_006506693.3	1700074P13Rik;1700074P13Rik;1700074P13Rik;1700074P13Rik;1700074P13Rik;1700074P13Rik	0;0;-751;-751;-751;0	26	17	9	48	29	19	49	42	7	10	8	2	28	26	2
chr6	41495001	41496000	1000	*	8.34412e-06	0.00474637	25.8231	Promoter (<=1kb)	6	41493381	41495152	1772	2	Gm29813	Gm29813	0	Gm29813	Gm29813	0	91	71	20	69	43	26	52	29	23	33	9	24	90	45	45
chr6	42245001	42246000	1000	*	1.12789e-05	0.00591042	-50.1984	Promoter (<=1kb)	6	42245935	42250441	4507	1	Gstk1	NM_029555.2	0	NM_029555.2	Gstk1	0	26	0	26	28	3	25	5	5	0	21	6	15	21	8	13
chr6	47942001	47943000	1000	*	1.56964e-07	0.000222644	-22.3762	Promoter (<=1kb)	6	47943175	47954549	11375	1	Zfp783	NR_027963.1	-175	NR_027963.1	Zfp783	-175	127	9	118	6	1	5	10	2	8	29	11	18	29	13	16
chr6	48087001	48088000	1000	*	3.01765e-08	6.24772e-05	-31.7909	Promoter (<=1kb)	6	48062391	48086694	24304	2	Zfp746	XM_017321731.1	-307	XM_006506556.3;XM_006506557.3;XM_006506559.3;XM_006506560.3;XM_011241454.2;XM_011241455.2;XM_011241456.2;XM_011241457.2;XM_017321730.1;XM_017321731.1;NM_001163475.1	Zfp746;Zfp746;Zfp746;Zfp746;Zfp746;Zfp746;Zfp746;Zfp746;Zfp746;Zfp746;Zfp746	-307;-307;-307;-307;-307;-307;-307;-307;-307;-307;-408	71	13	58	65	4	61	25	14	11	45	10	35	52	28	24
chr6	48619001	48620000	1000	*	1.43905e-10	6.85261e-07	-51.7215	Promoter (<=1kb)	6	48611273	48619218	7946	2	Gm38804	XR_869053.2	0	XR_869053.2;XM_006506078.3;NM_173429.2	Gm38804;Zfp775;Zfp775	0;0;0	52	10	42	86	38	48	60	38	22	20	20	0	23	20	3
chr6	49396001	49397000	1000	*	0.000155381	0.0353037	-38.0841	Promoter (<=1kb)	6	49395779	49469506	73728	1	Stk31	XM_006506748.3	222	XM_006506746.2;NM_029916.2;XM_006506748.3	Stk31;Stk31;Stk31	0;0;0	41	13	28	26	19	7	28	20	8	10	10	0	7	7	0
chr6	52204001	52205000	1000	*	4.36131e-09	1.27898e-05	35.1016	Promoter (<=1kb)	6	52201754	52204587	2834	2	Hoxa5	NM_010453.5	0	XM_017321402.1;NM_010452.3;NM_010453.5;NM_010454.1;NR_015611.2	Hoxa3;Hoxa3;Hoxa5;Hoxa6;Hoxaas3	0;0;0;3624;0	201	93	108	136	65	71	57	3	54	10	0	10	190	58	132
chr6	55646001	55647000	1000	*	8.28183e-05	0.0235415	20.7683	Promoter (2-3kb)	6	55649479	55651785	2307	1	Gm34441	XR_869125.1	-2479	XR_001785262.1;XR_377705.2;XR_869122.1;XR_377708.2;XR_869125.1	Gm34441;Gm34441;Gm34441;Gm34441;Gm34441	0;0;0;0;-2479	22	21	1	91	80	11	51	32	19	40	36	4	50	30	20
chr6	57534001	57535000	1000	*	1.0011e-06	0.000967248	33.6415	Promoter (<=1kb)	6	57506502	57535426	28925	2	Ppm1k	NM_175523.4	426	NM_175523.4;XR_868858.2;XM_006506082.3	Ppm1k;Ppm1k;Ppm1k	0;0;0	35	10	25	20	10	10	15	0	15	72	3	69	47	6	41
chr6	65041001	65042000	1000	*	5.45223e-06	0.00348163	-27.9085	Promoter (<=1kb)	6	65042589	65116046	73458	1	Smarcad1	XR_001785096.1	-589	XR_001785096.1;XM_006505509.3;NM_007958.1;XM_006505510.2;NM_001253392.1	Smarcad1;Smarcad1;Smarcad1;Smarcad1;Smarcad1	-589;-589;-667;-968;-1206	5	5	0	34	12	22	5	5	0	5	5	0	30	26	4
chr6	66465001	66466000	1000	*	4.76352e-06	0.00316647	-42.8797	Promoter (<=1kb)	6	66451943	66466472	14530	2	2610300M13Rik	XR_869150.2	472	XR_869150.2;XR_377738.2;XR_377739.2;XR_869151.1	2610300M13Rik;2610300M13Rik;2610300M13Rik;2610300M13Rik	0;0;0;0	61	20	41	38	18	20	19	12	7	6	6	0	21	18	3
chr6	67265001	67266000	1000	*	0.000104458	0.0273953	-34.2929	Promoter (<=1kb)	6	67266979	67289302	22324	1	Serbp1	NM_001113564.1	-979	NM_001113564.1;NM_001113565.1;NM_001113566.1;NM_025814.2	Serbp1;Serbp1;Serbp1;Serbp1	-979;-979;-979;-979	14	7	7	15	11	4	31	31	0	33	29	4	6	6	0
chr6	71441001	71442000	1000	*	4.50881e-10	1.81807e-06	-26.5687	Promoter (<=1kb)	6	71388639	71440643	52005	2	Rmnd5a	XM_006506539.2	-358	NM_024288.2;XM_006506539.2	Rmnd5a;Rmnd5a	-364;-358	40	18	22	120	10	110	42	20	22	36	17	19	37	24	13
chr6	71707001	71708000	1000	*	1.2518e-05	0.00638306	21.7137	Promoter (<=1kb)	6	71707681	71810710	103030	1	Reep1	NM_178608.4	0	NM_178608.4	Reep1	0	36	16	20	22	3	19	101	2	99	50	10	40	5	0	5
chr6	71824001	71825000	1000	*	1.08247e-05	0.00574559	-23.872	Promoter (<=1kb)	6	71812997	71823784	10788	2	Mrpl35	NM_025430.3	-217	NM_025430.3	Mrpl35	-217	40	20	20	52	14	38	18	13	5	7	2	5	29	25	4
chr6	79539001	79540000	1000	*	6.3746e-05	0.0198312	-21.0123	Promoter (1-2kb)	6	79541193	79542056	864	1	Gm6261	Gm6261	-1193	Gm6261	Gm6261	-1193	103	38	65	39	19	20	37	22	15	41	30	11	136	80	56
chr6	85424001	85425000	1000	*	7.33405e-08	0.000123886	-24.6697	Promoter (<=1kb)	6	85423899	85428278	4380	1	Noto	XM_006506356.3	102	NM_001007472.2;XM_006506356.3	Noto;Noto	0;0	69	15	54	12	11	1	10	7	3	17	16	1	10	8	2
chr6	86734001	86735000	1000	*	2.08973e-06	0.00171009	53.2305	Promoter (<=1kb)	6	86691768	86733399	41632	2	Gmcl1	XR_377446.3	-602	XM_011241156.2;XM_006505398.2;XM_006505397.2;NM_013471.2;NM_011818.3;XR_377446.3	Anxa4;Anxa4;Anxa4;Anxa4;Gmcl1;Gmcl1	40122;55962;58559;58584;-623;-602	56	46	10	40	33	7	5	1	4	5	2	3	11	3	8
chr6	87533001	87534000	1000	*	5.16847e-05	0.017211	-21.0185	Promoter (<=1kb)	6	87458544	87533261	74718	2	Arhgap25	XM_017321531.1	0	XM_017321531.1;NM_001037727.2;NM_001286610.1	Arhgap25;Arhgap25;Arhgap25	0;0;0	30	23	7	36	21	15	45	43	2	10	7	3	18	18	0
chr6	92093001	92094000	1000	*	2.44754e-06	0.00191964	51.2821	Promoter (<=1kb)	6	92092289	92171045	78757	1	Nr2c2	XM_006505905.3	712	NM_011630.3;XM_006505904.3;XM_017321518.1;XM_006505902.2;XM_006505906.3;XM_006505903.3;XM_006505905.3	Nr2c2;Nr2c2;Nr2c2;Nr2c2;Nr2c2;Nr2c2;Nr2c2	0;0;0;0;0;0;0	13	9	4	16	6	10	16	1	15	5	0	5	13	0	13
chr6	97807001	97808000	1000	*	2.19085e-05	0.00953788	-30.0081	Promoter (<=1kb)	6	97807002	98021360	214359	1	Mitf	XM_006505685.3	0	XM_006505685.3;XM_006505684.2;NM_001113198.1	Mitf;Mitf;Mitf	0;0;0	19	6	13	56	9	47	24	9	15	20	12	8	25	16	9
chr6	108140001	108141000	1000	*	2.68265e-11	1.54175e-07	24.7848	Promoter (<=1kb)	6	108140120	108140705	586	2	Gm4604	XR_869345.2	0	XR_869345.2;NM_145937.3;XM_006506444.1;XM_006506445.3	Gm4604;Sumf1;Sumf1;Sumf1	0;0;44591;44591	72	69	3	103	95	8	12	10	2	10	7	3	68	37	31
chr6	113623001	113624000	1000	*	3.08724e-11	1.72472e-07	29.0633	Promoter (<=1kb)	6	113624021	113631633	7613	1	Vhl	NM_009507.3	-21	NM_009507.3	Vhl	-21	94	43	51	48	32	16	56	21	35	78	21	57	247	42	205
chr6	116192001	116193000	1000	*	3.04582e-06	0.00228636	-66.5912	Promoter (<=1kb)	6	116018611	116193373	174763	2	Tmcc1	XM_006506308.2	373	Gm8213;XM_006506308.2;XM_006506309.1;XM_006506315.1;NM_177412.1	Gm8213;Tmcc1;Tmcc1;Tmcc1;Tmcc1	2873;0;0;0;0	15	0	15	43	9	34	7	6	1	5	5	0	11	5	6
chr6	121474001	121475000	1000	*	1.50217e-09	5.23405e-06	-33.4757	Promoter (<=1kb)	6	121377063	121473697	96635	2	Iqsec3	XM_006506113.3	-304	NM_001033354.3;NM_001289685.1;NR_110358.1;XM_006506111.3;XM_006506112.3;XM_006506113.3	Iqsec3;Iqsec3;Iqsec3;Iqsec3;Iqsec3;Iqsec3	-323;-323;-323;-304;-304;-304	67	36	31	73	48	25	50	46	4	12	12	0	81	71	10
chr6	122556001	122557000	1000	*	3.14873e-17	4.91989e-13	-61.5657	Promoter (2-3kb)	6	122553809	122564180	10372	1	Aicda	NM_009645.2	2192	NM_009645.2	Aicda	0	56	8	48	22	2	20	56	38	18	21	13	8	30	27	3
chr6	124964001	124965000	1000	*	6.43839e-07	0.000685523	32.4788	Promoter (<=1kb)	6	124958445	124965170	6726	2	Cops7a	XM_011241366.1	170	NM_001164089.1;XM_011241366.1;XM_006506157.1;XM_006506159.3;XM_006506160.2;XM_006506161.2;XM_017321593.1;XM_011241365.2;XM_006506162.3;NM_012003.2	Cops7a;Cops7a;Cops7a;Cops7a;Cops7a;Cops7a;Cops7a;Cops7a;Cops7a;Cops7a	0;0;0;0;0;0;0;0;0;0	10	8	2	58	42	16	63	19	44	39	16	23	5	3	2
chr6	125563001	125564000	1000	*	7.67722e-05	0.0224152	54.302	Promoter (1-2kb)	6	125565404	125686675	121272	1	Vwf	XM_006505918.3	-1404	XM_006505917.2;NM_011708.4;XM_006505918.3	Vwf;Vwf;Vwf	0;0;-1404	5	5	0	26	24	2	9	5	4	6	0	6	10	7	3
chr6	128423001	128424000	1000	*	1.27015e-05	0.00642786	-25.0108	Promoter (<=1kb)	6	128409444	128424797	15354	2	Itfg2	XM_006505230.2	797	XM_006505230.2;NM_133927.1;XM_006505229.3	Itfg2;Itfg2;Itfg2	0;0;0	63	27	36	40	20	20	30	21	9	16	10	6	55	45	10
chr6	133104001	133105000	1000	*	2.11749e-05	0.00930767	29.3447	Promoter (<=1kb)	6	133105239	133107750	2512	1	Smim10l1	NM_001163445.2	-239	XM_011241403.2;XR_868863.2;NM_001163445.2;NM_001271582.1;NM_001271583.1;NR_073368.1	Smim10l1;Smim10l1;Smim10l1;Smim10l1;Smim10l1;Smim10l1	0;0;-239;-239;-239;-239	26	25	1	18	12	6	13	12	1	36	23	13	27	0	27
chr6	134403001	134404000	1000	*	0.000189782	0.0399289	-23.9943	Promoter (<=1kb)	6	134258108	134403574	145467	2	LOC102639979	XR_869488.2	0	NM_025778.3;XR_869488.2;XR_001785384.1;XR_001785385.1;XR_001785386.1;XR_869489.1	Bcl2l14;LOC102639979;LOC102639979;LOC102639979;LOC102639979;LOC102639979	0;0;0;0;0;0	53	27	26	53	41	12	41	35	6	23	23	0	43	34	9
chr6	136805001	136806000	1000	*	0.000176173	0.0381657	-22.9654	Promoter (<=1kb)	6	136803993	136804431	439	2	Hist4h4	NM_175652.3	-570	NM_177688.4;NM_175652.3	H2afj;Hist4h4	-2248;-570	26	2	24	5	5	0	23	7	16	16	16	0	7	7	0
chr6	137586001	137587000	1000	*	0.000208817	0.0423389	-22.2061	Promoter (2-3kb)	6	137477672	137589021	111350	2	Eps8	XM_011241204.2	2021	NM_001271588.1;NM_007945.3;XM_011241204.2;XM_006505508.3	Eps8;Eps8;Eps8;Eps8	0;0;0;0	46	30	16	81	48	33	45	34	11	12	10	2	36	34	2
chr6	142386001	142387000	1000	*	2.8475e-08	5.96872e-05	-20.0394	Promoter (<=1kb)	6	142361898	142387015	25118	2	Recql	XM_017321468.1	15	XM_011241596.2;XM_011241597.2;XM_006506981.3;XR_869553.1;NM_025872.4;NM_001204907.1;XM_011241573.1;NM_001204906.1;NM_023042.3;XM_017321468.1;XM_017321469.1	Golt1b;Golt1b;Golt1b;Golt1b;Golt1b;Recql;Recql;Recql;Recql;Recql;Recql	-210;-210;-212;-212;-243;0;0;0;0;0;0	10	3	7	82	3	79	100	30	70	10	2	8	33	20	13
chr6	148441001	148442000	1000	*	1.65527e-06	0.00142192	-27.6641	Promoter (2-3kb)	6	148232430	148444352	211923	2	Tmtc1	NM_198967.5	2352	NM_198967.5;XM_006507071.3;XR_001785149.1;XM_017321670.1;XM_011241620.2;XM_011241618.2	Tmtc1;Tmtc1;Tmtc1;Tmtc1;Tmtc1;Tmtc1	0;0;0;0;0;0	62	37	25	45	21	24	46	33	13	30	24	6	65	59	6
chr7	3630001	3631000	1000	*	6.63073e-05	0.0203584	22.8662	Promoter (<=1kb)	7	3629985	3642485	12501	1	Prpf31	NM_027328.4	16	XR_001778029.1;XR_001778028.1;XR_881799.2;XR_001778027.1;NM_001159714.1;NM_027328.4;NM_001290381.1;NM_023524.2	Gm15927;Gm15927;Gm15927;Gm15927;Prpf31;Prpf31;Tfpt;Tfpt	13366;14354;14354;14354;0;0;-72;-72	20	18	2	16	2	14	73	0	73	30	1	29	33	27	6
chr7	3695001	3696000	1000	*	1.17917e-07	0.000178661	-53.5931	Promoter (<=1kb)	7	3694508	3701035	6528	1	Tsen34	NM_024168.2	493	XM_006540432.3;XM_006540433.3;XM_011250742.2;NM_029934.3;XM_017312222.1;XM_017312223.1;XM_017312224.1;NM_001164204.1;NM_001164205.1;XR_001777993.1;XM_006540280.3;XM_017312226.1;XM_017312225.1;NM_024168.2	Mboat7;Mboat7;Mboat7;Mboat7;Tsen34;Tsen34;Tsen34;Tsen34;Tsen34;Tsen34;Tsen34;Tsen34;Tsen34;Tsen34	-1640;-1640;-1640;-1476;0;0;0;0;0;0;0;0;0;0	10	4	6	35	3	32	20	14	6	5	5	0	11	7	4
chr7	5414001	5415000	1000	*	2.39873e-05	0.010134	21.5184	Promoter (<=1kb)	7	5408887	5413145	4259	2	Vmn1r58	NM_030739.2	-856	NM_030739.2	Vmn1r58	-856	42	38	4	16	14	2	35	23	12	7	6	1	51	26	25
chr7	6173001	6174000	1000	*	1.15076e-09	4.12458e-06	40.4018	Promoter (<=1kb)	7	6172516	6190422	17907	1	Zfp444	XM_006540383.3	485	XM_006540380.3;XM_006540381.3;NM_001146024.1;NM_028316.3;XM_006540383.3	Zfp444;Zfp444;Zfp444;Zfp444;Zfp444	0;0;0;0;0	49	41	8	27	24	3	60	29	31	55	20	35	51	27	24
chr7	6327001	6328000	1000	*	0.000156738	0.0355099	-22.0867	Promoter (2-3kb)	7	6315665	6330434	14770	2	Zfp583	NM_001033249.3	2434	XM_011250470.2;XM_011250468.2;XM_011250471.2;XM_011250472.2;XM_011250473.2;XM_011250469.2;XM_011250474.2;XM_011250475.2;NM_001033249.3	Zfp583;Zfp583;Zfp583;Zfp583;Zfp583;Zfp583;Zfp583;Zfp583;Zfp583	0;0;0;0;0;0;0;0;0	83	53	30	86	75	11	21	21	0	5	5	0	28	26	2
chr7	6344001	6345000	1000	*	5.51062e-08	9.97123e-05	67.5253	Promoter (<=1kb)	7	6342995	6345193	2199	2	Gm38944	XR_881809.2	193	XR_881809.2	Gm38944	0	5	5	0	44	23	21	24	3	21	16	0	16	15	2	13
chr7	7294001	7295000	1000	*	4.26364e-07	0.000492273	-33.7448	Promoter (1-2kb)	7	7282309	7296612	14304	2	Clcn4	XM_006539503.3	1612	XM_006539503.3;NM_001302386.1;NM_001302387.1;NM_011334.4;XM_006539501.3;XM_006539504.3;XM_006539507.3;XM_011250426.2;XM_017321961.1;XR_391040.3;XM_006539502.3;NR_126156.1;NR_126157.1;NA;NR_049193.1;NA	Clcn4;Clcn4;Clcn4;Clcn4;Clcn4;Clcn4;Clcn4;Clcn4;Clcn4;Clcn4;Clcn4;Clcn4;Clcn4;Mir5620;Mir5620;Mir5620	0;0;0;0;0;0;0;0;0;0;0;4557;5851;-3891;-3891;-3926	12	11	1	28	6	22	38	32	6	10	10	0	30	26	4
chr7	13178001	13179000	1000	*	1.46209e-06	0.0012916	-28.6532	Promoter (<=1kb)	7	13177719	13178669	951	1	Vmn1r88	NM_001167537.1	282	XR_881825.2;NM_001167537.1	Gm38946;Vmn1r88	6033;0	62	34	28	55	38	17	38	36	2	15	14	1	37	31	6
chr7	14304001	14305000	1000	*	7.53587e-05	0.0221774	36.1449	Promoter (<=1kb)	7	14304698	14307863	3166	1	Phf20-ps	Phf20-ps	0	Phf20-ps	Phf20-ps	0	23	22	1	38	28	10	48	35	13	49	16	33	5	2	3
chr7	16723001	16724000	1000	*	2.65296e-09	8.59215e-06	26.9444	Promoter (1-2kb)	7	16721929	16726110	4182	1	Ceacam9	NM_011927.4	1072	NM_011927.4;Gm5586	Ceacam9;Gm5586	0;-3066	5	3	2	15	14	1	80	6	74	12	5	7	5	5	0
chr7	16890001	16891000	1000	*	0.000204469	0.0418493	43.4446	Promoter (<=1kb)	7	16891736	16895451	3716	1	Gng8	XM_006539549.3	-736	NM_001081655.1;XM_006539549.3;XM_006539547.3;XM_011250436.2;NM_010320.3;XM_006539548.1	Dact3;Gng8;Gng8;Gng8;Gng8;Gng8	14684;-736;-737;-737;-786;-2226	5	5	0	6	6	0	19	18	1	59	27	32	24	7	17
chr7	24133001	24134000	1000	*	0.000184402	0.0392762	36.2922	Promoter (<=1kb)	7	24134163	24143241	9079	1	Zfp235	NM_019941.2	-163	XM_017322378.1;NM_019941.2;XM_011250655.1;XM_017322377.1	Zfp235;Zfp235;Zfp235;Zfp235	0;-163;-196;-1189	20	16	4	32	15	17	23	8	15	29	5	24	17	5	12
chr7	25367001	25368000	1000	*	1.37186e-05	0.00679475	41.6667	Promoter (1-2kb)	7	25367616	25369724	2109	2	Cnfn	NM_001081375.1	1724	NM_001081375.1;NM_028219.1;XM_017322286.1;NM_001160400.1	Cnfn;Cnfn;Megf8;Megf8	0;0;50249;49837	6	5	1	5	0	5	5	0	5	25	0	25	17	0	17
chr7	27196001	27197000	1000	*	2.47269e-07	0.000319056	-36.8353	Promoter (<=1kb)	7	27196178	27203943	7766	1	BC024978	XR_881742.2	0	NM_001243888.1;NM_001290511.1;NM_001290513.1;XR_881742.2;XM_011250622.2;XM_017322333.1;XM_011250621.2;XM_017322334.1;NM_001046637.1;NM_001285825.1;NM_015782.3	BC024978;BC024978;BC024978;BC024978;BC024978;BC024978;BC024978;BC024978;Snrpa;Snrpa;Snrpa	0;0;0;0;0;0;0;-3655;-241;0;0	62	1	61	98	4	94	15	5	10	7	4	3	7	2	5
chr7	27590001	27591000	1000	*	6.15297e-05	0.019349	-23.75	Promoter (<=1kb)	7	27591557	27639453	47897	1	Akt2	XM_006539482.1	-557	XM_006539482.1;NM_001110208.1;XM_006539477.1	Akt2;Akt2;Akt2	-557;-560;-1148	24	8	16	5	5	0	11	11	0	10	9	1	32	26	6
chr7	27928001	27929000	1000	*	1.79167e-06	0.00151452	60.9921	Promoter (<=1kb)	7	27907392	27929430	22039	2	1700049G17Rik	NM_028538.1	430	NM_028538.1;XR_881914.2;XR_881916.2	1700049G17Rik;Gm26891;Gm38720	0;0;2623	6	6	0	20	13	7	20	6	14	28	3	25	21	5	16
chr7	28313001	28314000	1000	*	0.000165825	0.0368172	-23.3972	Promoter (<=1kb)	7	28305826	28312046	6221	2	Timm50	NM_025616.3	-955	XM_006539702.2;XM_006539703.2;NM_013676.1;XM_011250673.2;NM_025616.3	Supt5;Supt5;Supt5;Timm50;Timm50	24804;24804;24719;-1116;-955	77	50	27	53	30	23	20	17	3	24	21	3	95	76	19
chr7	28435001	28436000	1000	*	9.71969e-05	0.0261845	-27.5596	Promoter (<=1kb)	7	28399522	28436191	36670	2	Samd4b	NM_175021.3	191	NM_001290550.1;NM_022024.2;NM_001039192.1;XM_006540273.3;XM_006540272.3;NM_175021.3	Gmfg;Gmfg;Gmfg;Gmfg;Gmfg;Samd4b	-1447;-1447;-4937;-4939;-4945;0	51	15	36	19	15	4	23	15	8	8	8	0	25	20	5
chr7	28519001	28520000	1000	*	1.40175e-06	0.00125125	46.2156	Promoter (2-3kb)	7	28522833	28524401	1569	1	Ifnl3	XM_006540130.1	-2833	XM_006540130.1;NM_177396.1	Ifnl3;Ifnl3	-2833;-2836	11	11	0	11	11	0	43	17	26	5	2	3	22	18	4
chr7	29137001	29138000	1000	*	2.04755e-08	4.67348e-05	-22.5574	Promoter (2-3kb)	7	29134939	29151621	16683	1	Rasgrp4	XM_011250525.1	2062	XR_001785523.1;XR_001785524.1;XM_017322164.1;XM_017322165.1;XM_017322159.1;XM_017322160.1;XM_017322161.1;XM_017322162.1;XM_017322163.1;XR_001785525.1;XR_001785526.1;NM_001174155.1;NM_145149.4;NR_045676.1;XM_011250525.1	Rasgrp4;Rasgrp4;Rasgrp4;Rasgrp4;Rasgrp4;Rasgrp4;Rasgrp4;Rasgrp4;Rasgrp4;Rasgrp4;Rasgrp4;Rasgrp4;Rasgrp4;Rasgrp4;Rasgrp4	0;0;0;0;0;0;0;0;0;0;0;0;0;0;0	80	7	73	6	2	4	68	34	34	12	5	7	23	9	14
chr7	30089001	30090000	1000	*	1.01803e-07	0.000159067	45.7441	Promoter (<=1kb)	7	30077337	30090510	13174	2	Zfp566	NM_152814.2	510	XM_011250583.1;NM_152814.2	Zfp260;Zfp566	-4782;0	50	18	32	15	10	5	22	1	21	18	1	17	30	2	28
chr7	30310001	30311000	1000	*	4.00449e-08	7.85194e-05	-48.4028	Promoter (1-2kb)	7	30308753	30314303	5551	1	Alkbh6	NM_198027.2	1248	NM_198027.2;XM_006540410.3;XM_006540411.3;NM_001081114.1;NM_001290565.1;NM_153577.2	Alkbh6;Clip3;Clip3;Clip3;Syne4;Syne4	0;18319;18319;18248;-3816;-3816	16	7	9	20	3	17	25	25	0	6	2	4	5	5	0
chr7	34312001	34313000	1000	*	6.25595e-06	0.00385456	22.656	Promoter (<=1kb)	7	34236707	34313540	76834	2	4931406P16Rik	XM_006539895.1	540	XM_006539895.1;XM_006539896.2;XM_006539894.1;XM_006539893.3	4931406P16Rik;4931406P16Rik;4931406P16Rik;4931406P16Rik	0;0;0;0	23	22	1	29	17	12	103	23	80	25	20	5	36	22	14
chr7	37774001	37775000	1000	*	4.8631e-07	0.000506878	-21.9077	Promoter (<=1kb)	7	37318023	37774173	456151	2	Zfp536	XM_017322241.1	0	XM_017322249.1;XM_011250580.2;XM_017322242.1;XM_017322246.1;XM_017322248.1;XM_017322247.1;XM_017322240.1;XM_017322244.1;XM_017322241.1;XM_017322245.1;XM_017322250.1;NM_172385.2	Zfp536;Zfp536;Zfp536;Zfp536;Zfp536;Zfp536;Zfp536;Zfp536;Zfp536;Zfp536;Zfp536;Zfp536	0;0;0;0;0;0;0;0;0;0;0;0	115	33	82	84	35	49	94	56	38	74	36	38	92	58	34
chr7	38069001	38070000	1000	*	3.13925e-09	7.86085e-06	24.4119	Promoter (<=1kb)	7	38069440	38092481	23042	1	Gm30771	XR_001778086.1	0	XR_001778085.1;XR_001778087.1;XR_391291.3;XR_001778086.1	Gm30771;Gm30771;Gm30771;Gm30771	0;0;0;0	99	85	14	69	52	17	143	73	70	122	66	56	145	92	53
chr7	38526001	38527000	1000	*	1.48977e-06	0.00121388	-28.7502	Promoter (1-2kb)	7	38518139	38528193	10055	2	Gm5591	NM_001013810.2	1193	XR_391301.3;XR_391302.3;NM_001013810.2	Gm29087;Gm29087;Gm5591	-1336;-1336;0	34	20	14	58	38	20	42	38	4	25	22	3	35	33	2
chr7	41500001	41501000	1000	*	9.10933e-06	0.0049222	33.0388	Promoter (<=1kb)	7	41478874	41499890	21017	2	AW146154	NM_001033530.3	-111	NM_001033530.3	AW146154	-111	22	6	16	17	8	9	10	1	9	10	0	10	42	1	41
chr7	41669001	41670000	1000	*	0.000126991	0.0296648	-27.7675	Promoter (<=1kb)	7	41666389	41668210	1822	2	Gm9252	Gm9252	-791	Gm9252;NR_004441.1	Gm9252;Vmn2r-ps54	-791;0	34	5	29	9	3	6	13	7	6	6	2	4	22	15	7
chr7	42951001	42952000	1000	*	0.000164847	0.0349672	-27.3901	Promoter (<=1kb)	7	42951724	42952207	484	1	Gm9266	Gm9266	0	Gm9266;Gm9294	Gm9266;Gm9294	0;2411	90	46	44	61	28	33	38	28	10	18	16	2	43	28	15
chr7	44337001	44338000	1000	*	0.000218025	0.0418422	-30.5362	Promoter (<=1kb)	7	44337508	44358062	20555	1	Shank1	XM_006540871.2	0	XM_006540864.3;XM_006540867.3;XM_006540868.3;XM_006540865.3;XM_006540866.3;NM_001034115.1;XM_006540874.1;XM_006540872.1;XM_006540869.2;XM_006540870.2;XM_006540871.2	Shank1;Shank1;Shank1;Shank1;Shank1;Shank1;Shank1;Shank1;Shank1;Shank1;Shank1	0;0;0;0;0;0;0;0;0;0;0	55	5	50	5	1	4	24	11	13	5	3	2	51	15	36
chr7	44495001	44496000	1000	*	0.000233015	0.0434959	-31.6778	Promoter (<=1kb)	7	44489938	44496513	6576	2	Emc10	NM_197991.2	513	NM_197991.2;XM_006541175.1;XM_006541176.1;NM_028169.1;XM_006541243.2;XM_006541248.1;XM_006541249.1;XM_006541242.1;XM_006541246.1;XM_011250907.2;XM_006541244.3;XM_006541245.3;XM_006541247.3	Emc10;Emc10;Emc10;Fam71e1;Fam71e1;Fam71e1;Fam71e1;Fam71e1;Fam71e1;Fam71e1;Fam71e1;Fam71e1;Fam71e1	0;0;0;-588;-589;-600;-600;-610;-610;-610;-610;-610;-610	15	6	9	15	9	6	55	46	9	48	45	3	34	23	11
chr7	45050001	45051000	1000	*	2.42485e-07	0.000284514	33.5458	Promoter (1-2kb)	7	45027707	45052881	25175	2	Prr12	NM_175022.2	1881	NM_175022.2;XM_011250888.1;XM_017312219.1;XM_006541062.2;XM_006541064.2;XM_006541063.2;NM_022999.1;XM_017312220.1	Prr12;Prrg2;Prrg2;Prrg2;Prrg2;Prrg2;Prrg2;Prrg2	0;11334;11347;11464;11464;11882;10652;11464	121	111	10	121	113	8	64	46	18	22	4	18	123	107	16
chr7	45211001	45212000	1000	*	1.34013e-08	2.64588e-05	-42.8301	Promoter (<=1kb)	7	45207525	45211883	4359	2	Dkkl1	NM_015789.3	0	NM_015789.3;XM_006540985.3;NM_001285498.1;NM_001285500.1;NM_011565.2;XM_006540777.2;XM_011250842.1	Dkkl1;Dkkl1;Tead2;Tead2;Tead2;Tead2;Tead2	0;0;-3753;-3753;-3753;-3806;-3814	168	33	135	86	31	55	141	49	92	9	9	0	66	51	15
chr7	45636001	45637000	1000	*	0.000144042	0.0321483	31.6667	Promoter (1-2kb)	7	45635673	45638772	3100	2	A030001D20Rik	XR_001778114.1	1772	XR_001778114.1;XM_006541232.3;XM_006541233.3;XM_006541234.3;NM_172418.2;XM_006541235.1;NM_028544.1	A030001D20Rik;Mamstr;Mamstr;Mamstr;Mamstr;Mamstr;Rasip1	0;-2192;-2192;-2192;-2977;-3846;0	21	21	0	10	9	1	24	16	8	5	3	2	30	19	11
chr7	47356001	47357000	1000	*	2.49212e-05	0.00981215	23.9329	Promoter (1-2kb)	7	47334875	47354240	19366	2	Mrgpra1	NM_153095.2	-1761	NM_153095.2	Mrgpra1	-1761	50	44	6	33	28	5	36	26	10	63	37	26	46	26	20
chr7	48880001	48881000	1000	*	9.07427e-05	0.0240729	24.6135	Promoter (<=1kb)	7	48866429	48881041	14613	2	E2f8	NM_001013368.5	41	NM_001013368.5;XM_006540553.3;XM_006540554.3;XR_001778361.1;XR_882080.1;XR_001778362.1;XR_001778363.1;XR_001778360.1;XR_882082.1;XR_882081.1;XR_001778364.1	E2f8;E2f8;E2f8;LOC108167326;LOC108167326;LOC108167326;LOC108167326;LOC108167326;LOC108167326;LOC108167326;LOC108167326	0;0;0;0;0;0;0;0;0;0;-459	44	16	28	35	19	16	69	5	64	63	18	45	76	20	56
chr7	57589001	57590000	1000	*	9.40198e-07	0.000854216	24.6895	Promoter (<=1kb)	7	57519645	57590410	70766	2	Gm42385	XR_882095.1	410	NM_001038701.2;NM_008071.3;XR_882095.1	Gabrb3;Gabrb3;Gm42385	-518;-1173;0	32	17	15	71	48	23	83	20	63	40	18	22	58	22	36
chr7	63458001	63459000	1000	*	0.000223164	0.0425229	-56.3889	Promoter (2-3kb)	7	63461692	63759897	298206	1	Otud7a	XM_011250812.2	-2692	XM_011250811.2;XM_017322005.1;NM_130880.1;XM_011250812.2	Otud7a;Otud7a;Otud7a;Otud7a	0;0;0;-2692	8	2	6	5	2	3	15	13	2	6	6	0	20	16	4
chr7	64391001	64392000	1000	*	9.98882e-07	0.00089175	-20.6792	Promoter (<=1kb)	7	64376541	64392236	15696	2	Mphosph10	NM_026483.2	236	XM_006541223.1;NM_028626.1;NM_026483.2	Mcee;Mcee;Mphosph10	-612;-771;0	17	15	2	57	19	38	25	18	7	22	20	2	54	44	10
chr7	67657001	67658000	1000	*	6.27831e-06	0.00374749	38.0144	Promoter (1-2kb)	7	67655430	67726577	71148	1	Ttc23	XM_006541109.3	1571	XM_017312244.1;XM_017312246.1;XM_017312248.1;XM_017312249.1;XM_017312251.1;XM_017312250.1;NM_001168477.1;NM_001168475.1;NM_001168476.1;NM_025905.3;XM_017312243.1;XM_017312245.1;XM_017312247.1;XM_017312252.1;XM_017312241.1;XM_017312253.1;XM_017312242.1;XM_006541109.3	Ttc23;Ttc23;Ttc23;Ttc23;Ttc23;Ttc23;Ttc23;Ttc23;Ttc23;Ttc23;Ttc23;Ttc23;Ttc23;Ttc23;Ttc23;Ttc23;Ttc23;Ttc23	0;0;0;0;0;0;0;0;0;0;0;0;0;0;0;0;0;0	19	19	0	22	17	5	38	14	24	37	11	26	34	29	5
chr7	69491001	69492000	1000	*	7.97463e-06	0.00446171	-36.1321	Promoter (<=1kb)	7	69475368	69491037	15670	2	Gm38584	XR_882201.1	0	NR_045940.1;XR_882201.1;XR_001778344.1;XR_882202.1	4930402F11Rik;Gm38584;Gm38584;Gm38584	-4094;0;0;0	58	24	34	71	19	52	9	6	3	12	8	4	22	17	5
chr7	70931001	70932000	1000	*	0.000235007	0.0436298	-23.2114	Promoter (1-2kb)	7	70912518	70933979	21462	2	Gm34783	Gm34783	1979	Gm34783	Gm34783	0	17	16	1	37	22	15	5	5	0	7	7	0	12	12	0
chr7	79553001	79554000	1000	*	0.000124632	0.0293195	27.7149	Promoter (2-3kb)	7	79542837	79550625	7789	2	Gm31740	XR_391642.1	-2376	XR_391642.1;XR_001778187.1	Gm31740;Gm35040	-2376;0	10	5	5	108	14	94	78	4	74	56	1	55	114	5	109
chr7	79743001	79744000	1000	*	3.50192e-08	5.89391e-05	-26.7762	Promoter (<=1kb)	7	79735957	79743126	7170	2	Pex11a	XM_006540707.1	0	XM_011250824.1;XM_006540707.1;NM_011068.1;XM_017322441.1;XM_017322439.1;XM_017322440.1;XM_017322438.1;XR_001785595.1;XM_006541047.3;XM_017322437.1;NM_001037927.1;XM_006541049.3	Pex11a;Pex11a;Pex11a;Wdr93;Wdr93;Wdr93;Wdr93;Wdr93;Wdr93;Wdr93;Wdr93;Wdr93	-1527;0;0;0;0;0;0;0;0;0;0;0	46	31	15	121	42	79	31	25	6	31	26	5	58	40	18
chr7	84084001	84085000	1000	*	1.19609e-06	0.0010276	-32.6203	Promoter (1-2kb)	7	83932857	84086505	153649	2	Cemip	NM_030728.4	1505	NM_030728.4;XM_006508352.3;XM_006508353.3;XM_006508354.3	Cemip;Cemip;Cemip;Cemip	0;0;0;0	23	11	12	37	26	11	61	57	4	39	38	1	63	53	10
chr7	88531001	88532000	1000	*	0.000183404	0.0375086	-45.4467	Promoter (<=1kb)	7	88530403	88530924	522	2	Rps13-ps2	Rps13-ps2	-77	Rps13-ps2	Rps13-ps2	-77	22	5	17	39	25	14	37	28	9	7	7	0	11	10	1
chr7	92670001	92671000	1000	*	1.85517e-10	6.92592e-07	-20.202	Promoter (<=1kb)	7	92643710	92670051	26342	2	Pcf11	XM_006508272.3	0	XM_006508272.3;NM_029078.3	Pcf11;Pcf11	0;-89	55	0	55	5	5	0	33	20	13	7	7	0	6	3	3
chr7	100131001	100132000	1000	*	0.000245071	0.0447695	-30.9715	Promoter (<=1kb)	7	100131880	100137487	5608	1	Gm34760	XR_378370.1	0	XR_378370.1	Gm34760	0	44	24	20	34	25	9	17	16	1	5	5	0	11	10	1
chr7	100286001	100287000	1000	*	2.96725e-06	0.0021082	-22.6879	Promoter (<=1kb)	7	100285520	100319699	34180	1	P4ha3	NM_177161.4	481	XM_006507944.3;XM_011241831.1;NM_177161.4	P4ha3;P4ha3;P4ha3	0;0;0	61	37	24	72	59	13	38	33	5	36	36	0	41	39	2
chr7	102571001	102572000	1000	*	1.49525e-05	0.00694622	39.3961	Promoter (<=1kb)	7	102571431	102579662	8232	1	Olfr550	XM_006507878.2	0	Gm5339;XM_006507878.2	Gm5339;Olfr550	-1585;0	22	19	3	25	19	6	28	12	16	20	7	13	40	19	21
chr7	103338001	103339000	1000	*	3.62395e-12	2.56591e-08	-21.712	Promoter (<=1kb)	7	103338056	103339003	948	1	Olfr599	NM_146731.1	0	NM_146731.1	Olfr599	0	132	34	98	169	40	129	143	51	92	54	24	30	240	142	98
chr7	103358001	103359000	1000	*	0.000274313	0.0479364	-23.8644	Promoter (<=1kb)	7	103358224	103359213	990	2	Olfr601	NM_146314.2	213	NM_146314.2	Olfr601	0	30	8	22	59	25	34	85	40	45	23	10	13	65	55	10
chr7	103451001	103452000	1000	*	1.91238e-05	0.00823737	-22.7521	Promoter (<=1kb)	7	103451339	103452298	960	1	Olfr606	NM_147094.1	0	NM_147094.1	Olfr606	0	53	11	42	35	5	30	88	39	49	21	7	14	139	60	79
chr7	107661001	107662000	1000	*	1.40097e-06	0.00116936	52.6442	Promoter (2-3kb)	7	107664691	107744889	80199	1	Ppfibp2	XM_006507453.1	-2691	NM_008905.2;XM_006507457.3;XM_006507443.2;XM_006507444.2;NM_001163557.1;XM_006507453.1;XM_006507454.1;XM_006507445.3;XM_006507446.2	Ppfibp2;Ppfibp2;Ppfibp2;Ppfibp2;Ppfibp2;Ppfibp2;Ppfibp2;Ppfibp2;Ppfibp2	0;0;0;0;0;0;0;0;0	19	19	0	26	25	1	39	30	9	6	0	6	32	19	13
chr7	107952001	107953000	1000	*	1.43003e-10	5.64676e-07	-23.6423	Promoter (1-2kb)	7	107954643	107955575	933	1	Olfr474	NM_146495.1	-1643	NM_146495.1	Olfr474	-1643	154	34	120	90	23	67	86	33	53	120	46	74	134	88	46
chr7	110844001	110845000	1000	*	0.000184121	0.0376179	-39.7222	Promoter (<=1kb)	7	110799469	110844452	44984	2	Rnf141	XR_001777995.1	0	XR_001777995.1;XR_869742.1;XM_006508123.2;XM_006508124.2;XM_006508125.2;NM_025999.3	Rnf141;Rnf141;Rnf141;Rnf141;Rnf141;Rnf141	0;0;0;0;0;0	12	5	7	18	13	5	6	6	0	10	9	1	15	15	0
chr7	111081001	111082000	1000	*	2.1963e-07	0.000270043	-46.3455	Promoter (1-2kb)	7	111067985	111083030	15046	2	Eif4g2	NM_001040131.2	1030	NM_001040131.2;NM_013507.3	Eif4g2;Eif4g2	0;0	44	1	43	23	2	21	16	7	9	10	9	1	23	5	18
chr7	111123001	111124000	1000	*	0.000143558	0.0321102	50.5378	Promoter (<=1kb)	7	111117673	111122675	5003	2	1700012D14Rik	NR_015573.2	-326	NR_015573.2	1700012D14Rik	-326	18	14	4	5	5	0	20	6	14	39	17	22	41	17	24
chr7	112681001	112682000	1000	*	9.75226e-08	0.000142018	44.9342	Promoter (1-2kb)	7	112679659	112906805	227147	1	Tead1	XM_006507563.2	1342	NM_001166584.1;NM_009346.3;XM_006507561.2;XM_006507562.2;XM_006507564.2;XM_006507565.2;XM_011241723.1;XM_006507563.2	Tead1;Tead1;Tead1;Tead1;Tead1;Tead1;Tead1;Tead1	0;0;0;0;0;0;0;0	63	55	8	23	12	11	27	7	20	5	0	5	33	16	17
chr7	113368001	113369000	1000	*	2.28106e-05	0.00920185	23.41	Promoter (<=1kb)	7	113315631	113368845	53215	2	Btbd10	XM_006508163.2	0	XM_006508163.2;XM_011241890.1;XM_006508160.2;XM_006508161.2;XM_006508162.2;NM_133700.2	Btbd10;Btbd10;Btbd10;Btbd10;Btbd10;Btbd10	0;0;0;0;0;0	55	36	19	75	46	29	46	23	23	64	14	50	52	25	27
chr7	116306001	116307000	1000	*	4.8308e-08	7.99935e-05	-44.6433	Promoter (1-2kb)	7	116123485	116308376	184892	2	Plekha7	NM_001305185.1	1376	NM_001305185.1;XM_017322186.1	Plekha7;Plekha7	0;0	29	10	19	28	2	26	48	30	18	32	29	3	37	16	21
chr7	116333001	116334000	1000	*	1.18954e-05	0.00598652	-45.4094	Promoter (<=1kb)	7	116333171	116333257	87	2	Snord14a	NR_028273.1	0	XR_869889.1;XM_006507441.3;XM_006507440.3;NM_011083.2;NM_026533.3;NR_028273.1	LOC102637815;Pik3c2a;Pik3c2a;Pik3c2a;Rps13;Snord14a	-236;109596;109599;109458;0;0	60	10	50	26	7	19	31	16	15	5	5	0	20	10	10
chr7	119793001	119794000	1000	*	6.2168e-06	0.00373248	28.8518	Promoter (<=1kb)	7	119783842	119793962	10121	2	Eri2	XM_006508207.2	0	XM_017322342.1;XM_017322343.1;XM_006508001.3;XM_006507998.3;XM_006507999.3;XR_378258.3;XM_011241852.2;XM_006508000.3;XM_011241848.2;XR_869733.2;XR_869734.2;XR_378256.3;XR_378254.3;XR_378255.3;XM_006507992.3;XM_006507990.3;XM_017322340.1;XR_378253.3;XM_006507991.3;XM_006507994.3;XM_011241845.2;XM_017322339.1;XM_017322341.1;NM_028129.2;NM_001004187.1;NM_027698.5;XM_017312302.1;XM_006508207.2;XM_006…	2610020H08Rik;2610020H08Rik;2610020H08Rik;2610020H08Rik;2610020H08Rik;2610020H08Rik;2610020H08Rik;2610020H08Rik;2610020H08Rik;2610020H08Rik;2610020H08Rik;2610020H08Rik;2610020H08Rik;2610020H08Rik;2610020H08Rik;2610020H08Rik;2610020H08Rik;2610020H08Rik;2610020H08Rik;2610020H08Rik;2610020H08Rik;2610020H08Rik;2610020H08Rik;2610020H08Rik;2610020H08Rik;Eri2;Eri2;Eri2;Eri2;Eri2	-22;-22;-125;-125;-125;-125;-125;-125;-125;-125;-125;-125;-125;-125;-125;-125;-125;-125;-125;-125;-125;-125;-125;-130;-187;0;-4912;0;0;0	36	34	2	22	20	2	33	8	25	19	14	5	31	29	2
chr7	119896001	119897000	1000	*	0.000233621	0.0435049	-20.3285	Promoter (<=1kb)	7	119853163	119896169	43007	2	Dcun1d3	XM_011241749.1	0	XM_011241750.2;XM_011241751.1;NM_173408.3;XM_011241748.2;NM_001163703.1;XM_011241749.1;XM_006508239.3;NM_001285959.1;NM_001285960.1;NM_001285961.2;XM_006508241.3;XM_006508237.3;XM_006508238.3;XM_006508240.3;XM_006508243.3;XM_006508244.3;XM_006508234.3;XM_006508235.3;XM_006508236.3;XM_017312338.1;NM_029610.3;XM_017312339.1;NR_126475.1	Dcun1d3;Dcun1d3;Dcun1d3;Dcun1d3;Dcun1d3;Dcun1d3;Lyrm1;Lyrm1;Lyrm1;Lyrm1;Lyrm1;Lyrm1;Lyrm1;Lyrm1;Lyrm1;Lyrm1;Lyrm1;Lyrm1;Lyrm1;Lyrm1;Lyrm1;Lyrm1;Lyrm1	-766;-463;-543;-273;-256;0;0;0;0;0;0;0;0;0;0;0;0;0;0;0;0;0;-3111	34	4	30	97	0	97	13	3	10	18	2	16	9	4	5
chr7	120842001	120843000	1000	*	0.000120718	0.0287335	26.6214	Promoter (<=1kb)	7	120842829	120889710	46882	1	Eef2k	XR_378214.2	0	XR_378214.2;XM_006507344.3;XM_006507345.3;NM_007908.4;NM_001267710.1;XM_006507342.3;XR_378468.2	Eef2k;Eef2k;Eef2k;Eef2k;Eef2k;Eef2k;Gm36449	0;0;0;0;-600;-690;0	79	38	41	84	51	33	56	17	39	26	3	23	123	51	72
chr7	123499001	123500000	1000	*	3.01314e-06	0.0021261	-28.836	Promoter (<=1kb)	7	123478631	123500449	21819	2	Zkscan2	NM_001081329.1	449	XM_006507551.2;NM_001081329.1;XR_378227.3	Zkscan2;Zkscan2;Zkscan2	-3638;0;0	101	53	48	85	32	53	46	35	11	26	23	3	28	16	12
chr7	126483001	126484000	1000	*	3.04188e-05	0.0112655	-53.3333	Promoter (2-3kb)	7	126484340	126486514	2175	2	LOC108167460	XR_001778288.1	2514	XR_001778288.1;XM_006507719.3;NM_001163713.1;NM_172745.3	LOC108167460;Tufm;Tufm;Tufm	2514;-3354;-3355;-3355	26	0	26	5	0	5	10	0	10	5	5	0	5	3	2
chr7	126650001	126651000	1000	*	0.000231058	0.0432879	-23.4926	Promoter (<=1kb)	7	126649309	126672779	23471	1	Sgf29	NM_029339.3	692	XM_017312365.1;NM_029339.3	Sgf29;Sgf29	0;0	5	4	1	17	2	15	10	3	7	10	10	0	32	25	7
chr7	127243001	127244000	1000	*	0.000288864	0.0496377	44.1667	Promoter (<=1kb)	7	127244480	127254807	10328	1	Zfp771	XM_006507842.2	-480	XM_006507739.1;XM_006507740.1;XM_006507842.2;NM_177362.3;XM_006507843.2;XM_006507844.1	Zfp553;Zfp553;Zfp771;Zfp771;Zfp771;Zfp771	9746;8743;-480;-526;-533;-1046	10	10	0	10	8	2	5	3	2	10	4	6	16	6	10
chr7	129591001	129592000	1000	*	0.000206894	0.0404205	-22.7276	Promoter (<=1kb)	7	129591713	129635275	43563	1	Wdr11	XR_378226.3	0	XR_378226.3;NM_172255.3	Wdr11;Wdr11	0;0	15	4	11	45	8	37	17	8	9	20	5	15	43	27	16
chr7	129592001	129593000	1000	*	6.78113e-08	0.00010469	31.7994	Promoter (<=1kb)	7	129591863	129635738	43876	1	Wdr11	NM_172255.3	138	XR_378226.3;NM_172255.3	Wdr11;Wdr11	0;0	85	17	68	36	19	17	34	0	34	37	3	34	53	3	50
chr7	140788001	140789000	1000	*	0.000280671	0.0486746	47.8798	Promoter (<=1kb)	7	140777229	140787854	10626	2	Syce1	NM_001143765.1	-147	Gm29799;NM_001143765.1	Gm29799;Syce1	3486;-147	18	7	11	16	16	0	10	1	9	49	17	32	5	1	4
chr7	142663001	142664000	1000	*	5.42759e-09	1.19834e-05	-41.0357	Promoter (<=1kb)	7	142650768	142662270	11503	2	Igf2	XM_006508487.1	-731	NM_010514.3;NM_001122736.2;XM_006508487.1;NM_001315488.1;NR_002855.2;XR_001778317.1	Igf2;Igf2;Igf2;Igf2;Igf2os;LOC108167467	-4197;-1730;-731;0;0;5709	49	16	33	85	3	82	7	5	2	28	11	17	27	18	9
chr7	143458001	143459000	1000	*	3.95055e-07	0.000436115	31.8684	Promoter (2-3kb)	7	143458339	143461050	2712	2	Cdkn1c	NM_001161624.1	2050	NM_001161624.1;NM_009876.4;XM_006508471.3;XM_006508469.3;XM_006508467.3;XM_006508470.3;XM_006508468.3;XR_378638.2;XR_378639.2;XR_378640.2	Cdkn1c;Cdkn1c;Cdkn1c;Cdkn1c;Cdkn1c;Cdkn1c;Cdkn1c;Gm33663;Gm33663;Gm33663	0;0;0;0;0;0;0;7781;7781;7781	68	47	21	51	39	12	64	26	38	36	12	24	127	62	65
chr8	11637001	11638000	1000	*	7.23126e-06	0.00418256	22.0656	Promoter (1-2kb)	8	11612883	11635877	22995	2	Ankrd10	XM_006508687.3	-1124	NM_001281974.1;NM_001281975.1;NM_133971.3;XM_006508686.3;XM_006508688.3;XM_006508691.3;XM_006508692.1;XM_006508685.3;XM_006508687.3;NR_030781.2;NM_001167967.2;NA;NR_106097.1;NA	Ankrd10;Ankrd10;Ankrd10;Ankrd10;Ankrd10;Ankrd10;Ankrd10;Ankrd10;Ankrd10;Ankrd10;Ankrd10;Mir7238;Mir7238;Mir7238	-1244;-1244;-1244;-1612;-1612;-1612;-1559;-1129;-1124;-1965;-1244;-1293;-1265;-1265	72	45	27	92	78	14	62	33	29	61	26	35	107	63	44
chr8	12477001	12478000	1000	*	3.68611e-05	0.0130048	-24.4014	Promoter (2-3kb)	8	12472134	12474458	2325	2	Gm33532	XR_378724.2	-2543	XR_378724.2	Gm33532	-2543	56	28	28	76	42	34	52	26	26	21	18	3	65	62	3
chr8	13889001	13890000	1000	*	2.08165e-07	0.000259339	24.0505	Promoter (<=1kb)	8	13884788	13890271	5484	2	Coprs	NM_025556.3	271	XM_006508848.3;NM_025556.3;XM_011242070.2	Coprs;Coprs;Coprs	0;0;0	40	14	26	34	7	27	17	1	16	63	2	61	46	1	45
chr8	14088001	14089000	1000	*	0.000134566	0.030735	-36.0931	Promoter (1-2kb)	8	14027565	14090327	62763	2	Erich1	NM_001034862.2	1327	XM_011242050.1;NM_001034862.2	Erich1;Erich1	0;0	29	8	21	59	36	23	41	25	16	32	31	1	12	10	2
chr8	19538001	19539000	1000	*	0.000198667	0.0395948	-28.7252	Promoter (2-3kb)	8	19535331	19541206	5876	1	Gm16425	Gm16425	2670	Gm16425	Gm16425	0	5	4	1	32	19	13	5	5	0	5	5	0	21	20	1
chr8	21958001	21959000	1000	*	6.13877e-05	0.0183477	-33.6667	Promoter (<=1kb)	8	21958714	21964303	5590	1	Fam90a1a	NM_001081662.1	0	NM_001081662.1;XR_378797.3	Fam90a1a;Gm29821	0;0	10	3	7	5	5	0	25	24	1	5	5	0	12	12	0
chr8	22452001	22453000	1000	*	6.91519e-05	0.0199709	26.3505	Promoter (1-2kb)	8	22453132	22454753	1622	2	Gm39140	XR_870236.1	1753	XR_870236.1	Gm39140	1753	35	34	1	34	34	0	5	3	2	19	14	5	47	39	8
chr8	22620001	22621000	1000	*	3.92502e-06	0.00262122	-22.5969	Promoter (2-3kb)	8	22623685	22627152	3468	1	Dkk4	XM_006509098.2	-2685	XM_006509098.2;NM_145592.2;XR_378800.1	Dkk4;Dkk4;Gm30135	-2685;-3043;5153	59	12	47	14	6	8	49	33	16	12	4	8	21	13	8
chr8	24673001	24674000	1000	*	4.71343e-05	0.0153379	37.5287	Promoter (<=1kb)	8	24602246	24674755	72510	2	Adam18	NM_010084.2	755	NM_010084.2;NR_136908.1;XM_017312524.1;NM_001324489.1;NM_009619.5;XM_011242113.2	Adam18;Adam18;Adam3;Adam3;Adam3;Adam3	0;0;41581;51852;51852;52032	21	18	3	23	10	13	33	8	25	29	9	20	27	7	20
chr8	24947001	24948000	1000	*	1.14247e-06	0.000989809	-20.2032	Promoter (<=1kb)	8	24836143	24948804	112662	2	Adam32	NM_001293693.1	804	NM_001293693.1;NM_153397.2;XM_006509162.3;XR_378788.2;XR_378789.2;XM_006509165.3;XM_006509164.2;NM_001270996.1;NM_007404.2;XM_006508986.3	Adam32;Adam32;Adam32;Adam32;Adam32;Adam32;Adam32;Adam9;Adam9;Adam9	0;0;0;0;0;0;0;68922;68922;68934	52	17	35	126	41	85	35	24	11	52	14	38	162	102	60
chr8	31010001	31011000	1000	*	2.4349e-08	4.34751e-05	-51.2387	Promoter (<=1kb)	8	31001395	31009494	8100	2	Gm32841	XR_378854.1	-507	XR_378853.1;XR_378854.1	Gm32841;Gm32841	-507;-507	44	13	31	15	0	15	39	30	9	18	11	7	45	27	18
chr8	31113001	31114000	1000	*	0.000189011	0.038049	-32.1582	Promoter (1-2kb)	8	31115037	31132071	17035	1	Rnf122	XM_006509189.3	-1037	XR_870300.1;XM_006509190.3;NM_175136.2;XM_006509189.3;XM_011242157.2	Gm40484;Rnf122;Rnf122;Rnf122;Rnf122	6372;0;0;-1037;-1045	10	3	7	73	27	46	23	17	6	47	20	27	41	33	8
chr8	31186001	31187000	1000	*	1.80321e-07	0.000232866	42.971	Promoter (<=1kb)	8	31187331	31237794	50464	1	Fut10	NM_001286424.1	-331	NM_001286424.1;NM_134161.3;NM_001012517.5;NM_001286422.1;NM_001286425.1	Fut10;Fut10;Fut10;Fut10;Fut10	-331;-331;-331;-331;-331	10	9	1	35	28	7	12	0	12	5	5	0	23	6	17
chr8	37370001	37371000	1000	*	2.44889e-05	0.00968854	-21.5054	Promoter (2-3kb)	8	37371728	37373277	1550	2	Gm6203	Gm6203	2277	Gm6203	Gm6203	2277	27	18	9	31	28	3	8	8	0	7	7	0	42	42	0
chr8	40894001	40895000	1000	*	0.000253631	0.0456319	-30.8143	Promoter (1-2kb)	8	40892129	40922070	29942	1	Slc7a2	XM_006509251.3	1872	NM_001044740.2;NM_007514.3;XM_006509253.3;XM_006509252.3;XM_006509250.3;XM_006509251.3	Slc7a2;Slc7a2;Slc7a2;Slc7a2;Slc7a2;Slc7a2	0;0;0;0;0;0	26	13	13	17	10	7	25	21	4	26	21	5	22	20	2
chr8	41043001	41044000	1000	*	1.05302e-05	0.0054463	-22.866	Promoter (1-2kb)	8	40990912	41041931	51020	2	Mtus1	NM_001005865.3	-1070	NM_001005865.3;NM_001005864.3;NM_001286413.1;NM_001005863.2;XM_006509239.1;XM_006509241.3;XM_006509240.3	Mtus1;Mtus1;Mtus1;Mtus1;Mtus1;Mtus1;Mtus1	-1070;0;0;0;0;0;0	51	18	33	100	41	59	102	64	38	68	41	27	125	75	50
chr8	41135001	41136000	1000	*	5.1565e-08	8.40313e-05	-42.4558	Promoter (<=1kb)	8	40991416	41134350	142935	2	Mtus1	XM_006509240.3	-651	NM_001005863.2;XM_006509239.1;XM_006509240.3	Mtus1;Mtus1;Mtus1	0;0;0	36	10	26	71	39	32	45	45	0	15	15	0	35	18	17
chr8	46010001	46011000	1000	*	0.000270463	0.0476285	-29.2271	Promoter (<=1kb)	8	46010598	46029478	18881	1	Lrp2bp	XR_378911.2	0	XR_378911.2;NM_026278.3;XM_006509483.1	Lrp2bp;Lrp2bp;Lrp2bp	0;0;-946	20	6	14	40	8	32	23	11	12	24	14	10	23	13	10
chr8	48008001	48009000	1000	*	2.62989e-05	0.0101895	27.2061	Promoter (<=1kb)	8	48002239	48009157	6919	2	Gm32052	XR_378954.2	157	XR_378954.2	Gm32052	0	57	35	22	38	29	9	81	23	58	95	38	57	99	56	43
chr8	55554001	55555000	1000	*	1.10993e-07	0.000156099	-83.3333	Promoter (1-2kb)	8	55552813	55553128	316	1	Gm36453	Gm36453	1188	Gm36453	Gm36453	1188	6	1	5	6	1	5	7	7	0	6	6	0	6	6	0
chr8	63933001	63934000	1000	*	1.99e-05	0.00847406	-21.7841	Promoter (<=1kb)	8	63932151	63933363	1213	1	Gm35713	Gm35713	850	Gm35713;NM_001195687.1	Gm35713;Sgol2b	0;0	37	27	10	93	43	50	30	20	10	20	18	2	40	35	5
chr8	64691001	64692000	1000	*	4.51559e-09	1.04179e-05	41.3472	Promoter (1-2kb)	8	64592542	64693109	100568	2	Cpe	NM_013494.4	1109	NM_013494.4	Cpe	0	39	24	15	91	57	34	54	12	42	15	3	12	10	2	8
chr8	66485001	66486000	1000	*	3.11261e-10	1.0699e-06	-41.8012	Promoter (<=1kb)	8	66476346	66486507	10162	2	Tma16	NM_025465.2	507	XM_006509715.3;NM_025465.2	Tma16;Tma16	0;0	89	5	84	43	10	33	28	17	11	25	7	18	15	12	3
chr8	67494001	67495000	1000	*	0.00013114	0.0301875	-31.5288	Promoter (<=1kb)	8	67494875	67502580	7706	1	Nat2	NM_001168577.1	0	XM_006509591.3;NM_008673.1;NM_001168577.1;XM_006509592.2;NM_010874.3	Nat1;Nat1;Nat2;Nat2;Nat2	8830;3243;0;0;0	34	8	26	31	5	26	15	2	13	6	5	1	54	31	23
chr8	69809001	69810000	1000	*	4.76697e-07	0.000501955	-61.0082	Promoter (<=1kb)	8	69808687	69821870	13184	1	Gmip	NM_198101.1	314	NM_133224.2;XR_001778408.1;XM_006509564.3;XR_379068.1;XM_006509799.3;XM_006509797.3;XM_006509798.3;XM_011242339.2;NM_198101.1	Atp13a1;Atp13a1;Atp13a1;Gm33695;Gmip;Gmip;Gmip;Gmip;Gmip	17838;17782;17781;4081;0;0;0;0;0	12	1	11	6	0	6	13	11	2	5	1	4	11	10	1
chr8	70085001	70086000	1000	*	2.64994e-05	0.010247	-48.2399	Promoter (1-2kb)	8	70083529	70090862	7334	1	Hapln4	NM_177900.4	1472	NM_177900.4;NM_001293795.1;NM_181540.4	Hapln4;Tm6sf2;Tm6sf2	0;12077;12077	37	4	33	34	7	27	11	9	2	6	6	0	10	1	9
chr8	71561001	71562000	1000	*	4.98518e-07	0.000514381	-55.9091	Promoter (1-2kb)	8	71555156	71559018	3863	2	Tmem221	XM_006509705.3	-1983	NM_145598.2;NM_001100462.1;XM_006509705.3	Nxnl1;Tmem221;Tmem221	0;-2130;-1983	44	8	36	70	21	49	66	33	33	10	10	0	10	9	1
chr8	78212001	78213000	1000	*	2.92101e-10	1.0341e-06	-41.0343	Promoter (<=1kb)	8	78204128	78213186	9059	2	Gm39202	XR_878950.2	186	XR_878950.2;XM_006531400.1;XM_011248516.2;XM_011248517.2;XM_011248518.2;NM_183096.3	Gm39202;Ttc29;Ttc29;Ttc29;Ttc29;Ttc29	0;-302;-310;-310;-310;-342	36	6	30	43	12	31	42	31	11	39	18	21	80	56	24
chr8	79373001	79374000	1000	*	9.68333e-07	0.000875902	-27.0752	Promoter (<=1kb)	8	79338409	79372676	34268	2	Smad1	XM_006530746.3	-325	NM_008539.3;XM_006530746.3	Smad1;Smad1	0;-325	45	31	14	40	30	10	34	33	1	12	12	0	20	20	0
chr8	88137001	88138000	1000	*	0.000119302	0.0285169	20.1483	Promoter (<=1kb)	8	88137885	88171952	34068	1	Heatr3	NM_172757.3	0	XM_011248420.1;NM_029074.3;NM_172757.3;NR_106039.1;NA;NA	Cnep1r1;Cnep1r1;Heatr3;Mir7071;Mir7071;Mir7071	18266;18242;0;-206;-211;-254	49	14	35	36	15	21	69	10	59	22	5	17	65	5	60
chr8	89047001	89048000	1000	*	0.000257591	0.0461016	-21.4923	Promoter (1-2kb)	8	89045769	89057676	11908	1	Gm3134	XR_879067.2	1232	XR_106150.4;XR_387888.3;XR_879064.1;XR_879068.2;XR_879060.2;XR_879063.2;XR_879061.2;XR_879062.2;XR_879065.1;XR_879069.1;XR_879067.2;XR_001778614.1;XR_001778613.1;XR_001778612.1;XM_006531238.3;NM_021390.3	Gm3134;Gm3134;Gm3134;Gm3134;Gm3134;Gm3134;Gm3134;Gm3134;Gm3134;Gm3134;Gm3134;LOC108167542;LOC108167542;LOC108167542;Sall1;Sall1	0;0;0;0;0;0;0;0;0;0;0;0;0;0;-3449;-2839	19	15	4	53	5	48	47	19	28	11	10	1	35	23	12
chr8	90490001	90491000	1000	*	1.58104e-07	0.000209445	35.5396	Promoter (<=1kb)	8	90480943	90491058	10116	2	Gm35797	XR_879075.1	58	XR_879075.1	Gm35797	0	27	26	1	31	26	5	36	12	24	19	15	4	37	19	18
chr8	91068001	91069000	1000	*	2.53672e-05	0.00992133	24.361	Promoter (1-2kb)	8	91070057	91123844	53788	1	Rbl2	NM_001282000.1	-1057	NM_001282000.1;NM_001282001.1;NM_011250.4	Rbl2;Rbl2;Rbl2	-1057;-1057;-1057	41	39	2	22	19	3	26	20	6	5	5	0	18	4	14
chr8	94101001	94102000	1000	*	2.77557e-05	0.0105932	-36.8056	Promoter (1-2kb)	8	94099542	94100572	1031	1	Gm39226	XR_879106.1	1459	NM_026116.2;XR_001778463.1;XM_006531304.2;XR_879106.1	Bbs2;Bbs2;Bbs2;Gm39226	-2190;-1631;-1631;1459	16	14	2	27	9	18	12	11	1	10	10	0	5	5	0
chr8	102787001	102788000	1000	*	1.31577e-06	0.00111181	-35.2137	Promoter (1-2kb)	8	102632095	102785983	153889	2	Cdh11	XM_006530626.3	-1018	NM_009866.5;XM_006530626.3	Cdh11;Cdh11	0;0	33	0	33	5	0	5	26	11	15	15	2	13	10	5	5
chr8	104249001	104250000	1000	*	9.8529e-10	2.77139e-06	-48.711	Promoter (<=1kb)	8	104226694	104248577	21884	2	Tk2	XM_006531233.3	-424	NM_001286383.1;NM_029295.3;NR_104433.1;NM_001037841.3;NM_021028.3;NR_045642.1;XM_006531234.1;XM_011248461.1;XM_006531235.3;XM_006531233.3	Cklf;Cklf;Cklf;Cklf;Tk2;Tk2;Tk2;Tk2;Tk2;Tk2	0;0;0;0;-443;-443;-469;-462;-457;-424	15	4	11	39	5	34	25	21	4	44	27	17	30	18	12
chr8	104250001	104251000	1000	*	4.28558e-16	6.76898e-12	-62.2904	Promoter (<=1kb)	8	104250861	104263447	12587	1	Cklf	NM_001286383.1	0	NM_001286383.1;NM_029295.3;NR_104433.1;NM_001037841.3;NM_021028.3;NR_045642.1;XM_006531234.1;XM_011248461.1;XM_006531235.3;XM_006531233.3	Cklf;Cklf;Cklf;Cklf;Tk2;Tk2;Tk2;Tk2;Tk2;Tk2	0;0;0;0;-1443;-1443;-1469;-1462;-1457;-1424	139	14	125	96	7	89	32	18	14	6	4	2	10	9	1
chr8	104310001	104311000	1000	*	3.93038e-06	0.00262122	-20.6817	Promoter (<=1kb)	8	104293542	104310145	16604	2	Cmtm1	NM_181990.2	0	NM_181990.2	Cmtm1	0	20	18	2	69	38	31	33	31	2	7	6	1	15	15	0
chr8	105169001	105170000	1000	*	5.86254e-05	0.0179667	55.3922	Promoter (<=1kb)	8	105170674	105217989	47316	1	Cbfb	NM_001161456.1	-674	NM_001161456.1;NM_001161457.1;NM_001161458.1;NM_022309.4	Cbfb;Cbfb;Cbfb;Cbfb	-674;-674;-674;-674	17	16	1	10	9	1	10	0	10	10	1	9	16	16	0
chr8	106894001	106895000	1000	*	1.31997e-05	0.00632267	-59.127	Promoter (<=1kb)	8	106893640	106923094	29455	1	Cirh1a	NM_011574.2	361	XM_006530834.2;XM_017312655.1;XM_017312656.1;NM_145412.3;XM_017312654.1;XM_006530842.3;NM_011574.2	Chtf8;Chtf8;Chtf8;Chtf8;Chtf8;Cirh1a;Cirh1a	-668;-412;-412;-408;-399;0;0	10	1	9	10	0	10	7	6	1	15	10	5	15	6	9
chr8	112474001	112475000	1000	*	1.8046e-05	0.00796863	41.7076	Promoter (<=1kb)	8	112472122	112475506	3385	2	Gm39254	XR_879204.1	506	XR_879204.1	Gm39254	0	18	16	2	62	59	3	5	1	4	14	9	5	9	6	3
chr8	119385001	119386000	1000	*	6.5344e-06	0.00385552	43.9683	Promoter (<=1kb)	8	119384389	119386392	2004	1	LOC108167584	XR_001778762.1	612	XR_001778762.1	LOC108167584	0	18	16	2	10	8	2	16	0	16	14	3	11	10	10	0
chr8	121906001	121907000	1000	*	0.000119102	0.0285169	-30.0071	Promoter (<=1kb)	8	121881146	121907686	26541	2	Slc7a5	NM_011404.3	686	NM_001033485.2;NM_011404.3	BC048644;Slc7a5	-833;0	51	9	42	36	2	34	52	20	32	6	3	3	11	4	7
chr8	123101001	123102000	1000	*	1.11774e-11	6.55738e-08	41.4397	Promoter (<=1kb)	8	123102350	123105244	2895	1	Rpl13	NM_016738.5	-350	NR_106047.1;NA;NA;NM_016738.5;NR_028128.1;NM_153176.4	Mir7079;Mir7079;Mir7079;Rpl13;Snord68;Spg7	-2975;-2980;-3023;-350;-1058;35493	14	6	8	72	44	28	61	8	53	27	5	22	16	0	16
chr8	124522001	124523000	1000	*	0.00027247	0.0477363	-29.6516	Promoter (1-2kb)	8	124520767	124552008	31242	1	Cog2	XR_001778485.1	1234	NM_029746.3;XR_001778485.1	Cog2;Cog2	0;0	34	29	5	16	6	10	43	41	2	13	11	2	44	41	3
chr9	15494001	15495000	1000	*	0.000105524	0.0264387	36.937	Promoter (<=1kb)	9	15493804	15545260	51457	1	Smco4	XM_011242411.1	197	XM_006510043.2;XM_011242408.2;XM_011242409.2;XM_011242411.1	Smco4;Smco4;Smco4;Smco4	0;0;0;0	46	33	13	25	23	2	21	4	17	25	18	7	16	7	9
chr9	19621001	19622000	1000	*	4.82166e-07	0.000505123	35.8305	Promoter (<=1kb)	9	19622038	19649743	27706	1	Zfp317	XM_006510288.3	-38	XM_006510288.3;XM_006510289.3;XM_006510277.3;XM_006510282.3;XM_006510283.3;XM_006510284.3;XM_006510285.3;XM_017313370.1;NM_172918.4;XM_011242518.2;XM_017313367.1;XM_017313368.1;XM_017313369.1;XM_006510274.3;XM_006510280.3;XM_011242514.2;XM_011242515.2;XM_011242517.2;XM_017313365.1;XM_017313366.1;XM_017313371.1;XM_017313372.1;XM_017313373.1	Zfp317;Zfp317;Zfp317;Zfp317;Zfp317;Zfp317;Zfp317;Zfp317;Zfp317;Zfp317;Zfp317;Zfp317;Zfp317;Zfp317;Zfp317;Zfp317;Zfp317;Zfp317;Zfp317;Zfp317;Zfp317;Zfp317;Zfp317	-38;-38;-42;-42;-42;-42;-42;-42;-91;-294;-294;-294;-294;-295;-295;-295;-295;-295;-295;-295;-295;-295;-299	39	21	18	27	19	8	80	14	66	45	12	33	75	26	49
chr9	20520001	20521000	1000	*	1.39606e-07	0.000189839	-29.4347	Promoter (<=1kb)	9	20495068	20521419	26352	2	Zfp266	NM_001082485.1	419	NM_001082485.1;NM_001135019.1;XM_011242623.2;XM_011242624.2;XM_011242622.2	Zfp266;Zfp266;Zfp266;Zfp266;Zfp266	0;0;0;0;0	33	10	23	56	14	42	44	30	14	13	5	8	65	42	23
chr9	22096001	22097000	1000	*	1.61952e-10	6.27433e-07	-76.9048	Promoter (2-3kb)	9	22099221	22108728	9508	1	Cnn1	XM_011242388.2	-2221	XM_011242388.2;NM_009922.4;XM_006509969.3;Gm6581	Cnn1;Cnn1;Cnn1;Gm6581	-2221;-2253;-3322;3557	17	0	17	10	0	10	7	6	1	20	13	7	5	4	1
chr9	22155001	22156000	1000	*	2.26405e-07	0.00027478	-23.629	Promoter (<=1kb)	9	22156846	22158355	1510	1	Pigyl	NM_001082532.1	-846	NM_001082532.1	Pigyl	-846	10	0	10	79	3	76	76	20	56	11	1	10	34	14	20
chr9	24624001	24625000	1000	*	7.20946e-05	0.0204749	-28.0142	Promoter (<=1kb)	9	24625185	24625828	644	1	Cypt4	NM_173412.2	-185	NM_173412.2;XM_006510428.3;NM_001166207.1;XM_011242557.2;XM_006510427.3;XR_870529.2;XR_379122.3;XR_001778933.1;XM_011242556.2	Cypt4;Dpy19l2;Dpy19l2;Dpy19l2;Dpy19l2;Dpy19l2;Dpy19l2;Dpy19l2;Dpy19l2	0;0;0;0;0;0;0;0;0	51	24	27	39	19	20	29	22	7	23	18	5	53	39	14
chr9	24625001	24626000	1000	*	5.89884e-07	0.000582694	32.0641	Promoter (<=1kb)	9	24625185	24625828	644	1	Cypt4	NM_173412.2	0	NM_173412.2;XM_006510428.3;NM_001166207.1;XM_011242557.2;XM_006510427.3;XR_870529.2;XR_379122.3;XR_001778933.1;XM_011242556.2	Cypt4;Dpy19l2;Dpy19l2;Dpy19l2;Dpy19l2;Dpy19l2;Dpy19l2;Dpy19l2;Dpy19l2	0;0;0;0;0;0;0;0;0	98	61	37	60	48	12	59	18	41	10	2	8	15	10	5
chr9	26809001	26810000	1000	*	1.82733e-05	0.00803447	24.8096	Promoter (2-3kb)	9	26763042	26806473	43432	2	Glb1l2	XM_006510297.3	-2528	XM_006510297.3;XM_006510303.3;XM_006510300.3;XM_006510302.3;NM_153803.1;NM_001310768.1	Glb1l2;Glb1l2;Glb1l2;Glb1l2;Glb1l2;Glb1l2	-2528;-4532;-4120;-2815;-2584;-2533	38	30	8	42	38	4	53	28	25	51	48	3	58	19	39
chr9	26922001	26923000	1000	*	9.34839e-06	0.00499876	26.9347	Promoter (<=1kb)	9	26879595	26922987	43393	2	Gm1110	XM_006510459.2	0	NM_001281475.1;XM_006510460.3;XM_006510459.2;XM_006510461.2;XR_001778935.1	Gm1110;Gm1110;Gm1110;Gm1110;Gm1110	0;-157;0;0;0	35	32	3	15	15	0	87	52	35	34	30	4	48	28	20
chr9	27031001	27032000	1000	*	4.00904e-11	1.8293e-07	-82.2222	Promoter (<=1kb)	9	27030593	27096522	65930	1	Ncapd3	XM_017313698.1	408	XR_001779074.1;XM_006510697.3;XM_006510698.3;NM_178113.3;XM_017313698.1;NM_178027.4	Ncapd3;Ncapd3;Ncapd3;Ncapd3;Ncapd3;Vps26b	0;0;0;0;0;-907	22	0	22	15	0	15	5	4	1	6	4	2	5	5	0
chr9	28401001	28402000	1000	*	0.000243596	0.0445794	35.0296	Promoter (<=1kb)	9	28364421	28402525	38105	2	Gm39313	XR_870600.2	525	XR_870600.2;XM_011242559.2;NM_177906.4;XM_006510434.3;XM_006510435.3;XM_006510437.3;XM_006510438.3;XM_006510439.3	Gm39313;Opcml;Opcml;Opcml;Opcml;Opcml;Opcml;Opcml	0;0;0;-526;-1126;-1126;-1126;-1256	50	45	5	6	6	0	22	16	6	29	19	10	12	5	7
chr9	36832001	36833000	1000	*	1.21101e-05	0.00602093	-27.0412	Promoter (<=1kb)	9	36832689	36878927	46239	1	Fez1	XM_006510227.3	0	XM_017313312.1;XM_006510229.3;XM_006510227.3;XM_017313313.1;XM_006510228.3;Gm27219	Fez1;Fez1;Fez1;Fez1;Fez1;Gm27219	0;0;0;-32;-556;0	29	13	16	57	12	45	15	13	2	7	2	5	34	22	12
chr9	37668001	37669000	1000	*	0.000157071	0.0338069	-32.9099	Promoter (<=1kb)	9	37659902	37669222	9321	2	Panx3	NM_172454.2	222	NM_172454.2	Panx3	0	39	23	16	28	14	14	11	10	1	15	13	2	26	22	4
chr9	41208001	41209000	1000	*	1.8276e-08	3.50714e-05	-33.6364	Promoter (1-2kb)	9	41206155	41217627	11473	1	1700063D05Rik	NR_040392.1	1846	NR_040392.1	1700063D05Rik	0	30	7	23	5	5	0	11	10	1	5	5	0	20	19	1
chr9	44406001	44407000	1000	*	4.35895e-06	0.00279893	49.2248	Promoter (<=1kb)	9	44403755	44406939	3185	2	Trappc4	XM_017313498.1	0	XR_001778937.1;XR_001778938.1;XM_006510472.2;NM_201372.3;XR_379123.2;XR_379124.3;XM_011242569.2;NM_024266.3;XM_006510011.1;NM_001293631.1;XM_006510012.3;XM_006510010.3;XM_006510016.3;XM_006510013.3;NM_001293630.1;NM_008063.2;XM_017313498.1;NM_021789.2	Ccdc84;Ccdc84;Ccdc84;Ccdc84;Ccdc84;Ccdc84;Ccdc84;Rps25;Slc37a4;Slc37a4;Slc37a4;Slc37a4;Slc37a4;Slc37a4;Slc37a4;Slc37a4;Trappc4;Trappc4	11078;11078;11079;11007;11078;11078;11081;-714;9144;9074;8978;8947;8946;8945;8906;7825;0;0	43	28	15	5	5	0	10	10	0	25	0	25	10	0	10
chr9	50603001	50604000	1000	*	0.000220116	0.0420828	-21.6888	Promoter (<=1kb)	9	50596340	50603849	7510	2	Sdhd	NM_025848.3	0	NM_001134902.1;NM_212449.2;XM_011242545.2;XM_011242546.2;NM_025848.3;NM_013897.2	AU019823;AU019823;AU019823;AU019823;Sdhd;Timm8b	13464;13464;13418;13418;0;0	10	0	10	43	2	41	31	12	19	10	0	10	6	2	4
chr9	50604001	50605000	1000	*	4.362e-06	0.00279893	-35.7576	Promoter (<=1kb)	9	50603901	50605320	1420	1	Timm8b	NM_013897.2	100	NM_001134902.1;NM_212449.2;XM_011242545.2;XM_011242546.2;NM_025848.3;NM_013897.2	AU019823;AU019823;AU019823;AU019823;Sdhd;Timm8b	12464;12464;12418;12418;0;0	12	0	12	66	0	66	20	9	11	5	3	2	44	1	43
chr9	50853001	50854000	1000	*	1.09954e-05	0.00560224	37.8629	Promoter (2-3kb)	9	50856617	50881247	24631	1	Ppp2r1b	XR_001779023.1	-2617	XR_001779023.1;XR_001779024.1;XM_006510641.3;XM_006510642.3;NM_028614.3;NM_001034085.2;NM_001286553.1	Ppp2r1b;Ppp2r1b;Ppp2r1b;Ppp2r1b;Ppp2r1b;Ppp2r1b;Ppp2r1b	-2617;-2622;-2625;-2625;-2924;-2924;-2924	10	8	2	16	16	0	16	5	11	5	4	1	31	14	17
chr9	51874001	51875000	1000	*	2.57363e-08	4.5556e-05	49.6032	Promoter (<=1kb)	9	51839493	51875885	36393	2	Arhgap20os	NR_033560.1	885	NR_033560.1	Arhgap20os	0	17	17	0	5	3	2	109	39	70	68	21	47	53	13	40
chr9	52114001	52115000	1000	*	4.64969e-05	0.0152912	-21.7589	Promoter (<=1kb)	9	52115623	52115739	117	1	Mir6244	NR_105750.1	-623	NR_105750.1;NA;XM_006510334.3;XM_006510333.2;NM_001162921.1	Mir6244;Mir6244;Zc3h12c;Zc3h12c;Zc3h12c	-623;-653;0;0;0	61	47	14	27	19	8	59	57	2	17	17	0	49	44	5
chr9	55208001	55209000	1000	*	1.3479e-06	0.00112967	-32.5456	Promoter (<=1kb)	9	55208935	55224433	15499	1	Fbxo22	NM_028049.2	0	NM_028049.2;XM_006511459.2;XM_006510767.3;NM_180600.3;XM_006510768.3	Fbxo22;Fbxo22;Ube2q2;Ube2q2;Ube2q2	0;-2353;60469;58632;58147	31	4	27	139	7	132	11	6	5	10	2	8	10	5	5
chr9	55210001	55211000	1000	*	9.24525e-05	0.0243378	-33.3333	Promoter (<=1kb)	9	55211353	55224433	13081	1	Fbxo22	XM_006511459.2	-353	NM_028049.2;XM_006511459.2;XM_006510767.3;NM_180600.3;XM_006510768.3	Fbxo22;Fbxo22;Ube2q2;Ube2q2;Ube2q2	0;-353;62469;60632;60147	17	14	3	17	8	9	17	16	1	5	5	0	18	18	0
chr9	55324001	55325000	1000	*	2.34982e-05	0.00940531	-24.5186	Promoter (1-2kb)	9	55326919	55438345	111427	1	Tmem266	XM_006511162.1	-1919	XM_006511162.1;XM_006511161.2;NM_172923.3	Tmem266;Tmem266;Tmem266	-1919;-1944;-1949	43	29	14	74	38	36	47	37	10	29	28	1	34	26	8
chr9	57486001	57487000	1000	*	2.11752e-05	0.00878372	38.8915	Promoter (2-3kb)	9	57483914	57484591	678	1	Gm6166	Gm6166	2087	Gm6166	Gm6166	2087	7	7	0	55	51	4	38	27	11	16	4	12	55	42	13
chr9	65034001	65035000	1000	*	3.35573e-06	0.00232783	-32.0628	Promoter (1-2kb)	9	65032458	65082651	50194	1	Dpp8	NM_028906.2	1543	XR_001779050.1;XR_001779051.1;XM_006511517.3;NM_028906.2;XR_870867.2;XR_001779210.1	Dpp8;Dpp8;Dpp8;Dpp8;Gm39362;Gm39362	0;0;0;0;-2516;-1646	22	14	8	41	27	14	32	31	1	31	29	2	5	5	0
chr9	67761001	67762000	1000	*	3.65832e-05	0.0129289	54.4444	Promoter (1-2kb)	9	67756420	67759510	3091	2	LOC102633151	XR_379578.3	-1491	XM_006511533.2;NM_001081314.2;XR_379578.3	C2cd4b;C2cd4b;LOC102633151	44776;1564;-1491	5	5	0	5	5	0	10	7	3	16	0	16	6	4	2
chr9	71154001	71155000	1000	*	0.000261666	0.0465181	20.7559	Promoter (1-2kb)	9	71156041	71159644	3604	1	Gm32714	XR_379613.3	-1041	NM_001271843.1;NM_022026.3;NR_073483.1;XM_006511332.3;XM_011242782.2;XM_006511331.2;XM_011242783.1;XR_870898.2;XR_379613.3;XR_870897.1	Aqp9;Aqp9;Aqp9;Aqp9;Aqp9;Aqp9;Aqp9;Gm32714;Gm32714;Gm32714	0;0;0;0;0;0;0;0;-1041;-2496	62	60	2	5	5	0	54	46	8	32	27	5	30	19	11
chr9	71770001	71771000	1000	*	3.66562e-06	0.00250056	-47.7149	Promoter (<=1kb)	9	71626507	71771602	145096	2	Cgnl1	NM_001304362.1	602	NM_001304362.1;NM_026599.5;XM_006511395.1	Cgnl1;Cgnl1;Cgnl1	0;0;0	10	3	7	17	3	14	26	22	4	20	14	6	10	6	4
chr9	72437001	72438000	1000	*	3.14436e-11	1.46736e-07	-32.6647	Promoter (<=1kb)	9	72438517	72458581	20065	1	Mns1	XM_006510824.3	-517	Gm27254;XM_006510824.3;NM_008613.3;XM_011242665.2	Gm27254;Mns1;Mns1;Mns1	-4284;-517;-529;-1954	57	37	20	25	15	10	42	39	3	68	67	1	83	78	5
chr9	75037001	75038000	1000	*	5.91955e-06	0.00360751	32.3748	Promoter (<=1kb)	9	75037614	75060313	22700	1	Arpp19	NM_001142655.1	0	NM_001142655.1;XM_006511327.1;NM_021548.4;XM_006511127.3;XR_379418.3;XM_006511126.3;NM_001113283.1;XR_001778884.1;XR_379417.3;NM_153584.2	Arpp19;Arpp19;Arpp19;Fam214a;Fam214a;Fam214a;Fam214a;Fam214a;Fam214a;Fam214a	0;0;0;84148;84146;84141;83948;61571;61567;60890	10	8	2	30	13	17	28	11	17	23	9	14	148	14	134
chr9	78050001	78051000	1000	*	1.27135e-05	0.00623026	-36.0248	Promoter (<=1kb)	9	78051958	78065624	13667	1	Gcm1	NM_008103.3	-958	NM_008103.3	Gcm1	-958	24	15	9	23	13	10	15	15	0	14	13	1	16	15	1
chr9	83691001	83692000	1000	*	3.8215e-06	0.00258117	28.1126	Promoter (<=1kb)	9	83691475	83693247	1773	1	Gm2109	NR_046066.1	0	NR_046066.1	Gm2109	0	35	12	23	25	7	18	34	0	34	11	1	10	10	0	10
chr9	86881001	86882000	1000	*	3.8436e-06	0.00258759	-38.5988	Promoter (<=1kb)	9	86766735	86880708	113974	2	Snap91	XM_006510894.3	-293	XM_006510897.1;XM_006510898.3;XM_017313237.1;NM_001277982.1;NM_001277983.1;NM_001277985.1;NM_001277986.1;NM_013669.2;NR_102729.1;XM_006510900.2;XM_017313236.1;XM_006510895.3;XM_006510896.3;XM_006510899.3;XM_006510901.3;XM_006510902.3;XM_006510903.3;XM_006510904.3;XM_006510894.3	Snap91;Snap91;Snap91;Snap91;Snap91;Snap91;Snap91;Snap91;Snap91;Snap91;Snap91;Snap91;Snap91;Snap91;Snap91;Snap91;Snap91;Snap91;Snap91	-536;-536;-536;-604;-552;-552;-552;-552;-552;-536;-557;-536;-536;-536;-536;-536;-536;-536;-293	51	16	35	38	13	25	22	15	7	17	14	3	22	14	8
chr9	88718001	88719000	1000	*	0.000170682	0.0357982	-32.6061	Promoter (<=1kb)	9	88688605	88719605	31001	2	Mthfsl	XM_006510729.3	605	NM_007536.2;XM_006510729.3;NM_001128601.1;XM_006510730.2;XM_006510728.3;XR_870748.2;XR_379391.3;XR_870749.2;XM_011242646.2;XR_870750.2	Bcl2a1d;Mthfsl;Mthfsl;Mthfsl;Mthfsl;Mthfsl;Mthfsl;Mthfsl;Mthfsl;Mthfsl	12850;0;0;0;0;0;0;0;0;0	42	26	16	59	34	25	29	25	4	11	10	1	5	5	0
chr9	90127001	90128000	1000	*	8.12405e-06	0.0045054	36.5541	Promoter (<=1kb)	9	90126509	90126581	73	2	n-TKctt18	rna57831	-420	rna57831	n-TKctt18	-420	18	17	1	7	7	0	78	32	46	32	27	5	53	30	23
chr9	96906001	96907000	1000	*	4.69282e-05	0.0153379	24.2257	Promoter (<=1kb)	9	96905409	96906097	689	1	LOC108167676	LOC108167676	592	LOC108167676	LOC108167676	0	59	56	3	44	42	2	67	54	13	15	8	7	38	30	8
chr9	99569001	99570000	1000	*	2.91578e-09	7.39139e-06	63.7821	Promoter (<=1kb)	9	99478385	99568944	90560	2	Armc8	XM_006511511.3	-57	XM_006511515.3;XM_006511513.3;XM_006511512.3;XM_006511511.3;NM_028768.3;NM_001166138.1	Armc8;Armc8;Armc8;Armc8;Armc8;Armc8	-71;-67;-59;-57;-102;-102	18	11	7	8	6	2	12	0	12	23	0	23	39	5	34
chr9	101449001	101450000	1000	*	3.4207e-05	0.0122579	-27.3165	Promoter (<=1kb)	9	101448468	101449342	875	2	Gm5161	Gm5161	0	Gm5161	Gm5161	0	19	6	13	73	18	55	46	30	16	23	6	17	16	12	4
chr9	106450001	106451000	1000	*	0.000290009	0.049691	-35.7576	Promoter (<=1kb)	9	106440051	106451204	11154	2	Abhd14a	XM_006511805.3	204	XM_017313550.1;XM_017313553.1;XM_017313551.1;XM_017313554.1;XM_006511796.3;XM_006511802.3;XM_006511803.3;XM_011242910.2;XM_017313549.1;XM_017313552.1;XM_006511804.2;NM_001110271.1;NM_001110272.1;NM_145919.2;XM_006511805.3;XM_017313555.1;XM_017313683.1;XM_006511848.3;NM_029631.3;XM_006511779.3;XM_006511782.3;XM_006511783.3;XM_006511781.1;XM_006511780.1;NM_021567.5	Abhd14a;Abhd14a;Abhd14a;Abhd14a;Abhd14a;Abhd14a;Abhd14a;Abhd14a;Abhd14a;Abhd14a;Abhd14a;Abhd14a;Abhd14a;Abhd14a;Abhd14a;Abhd14a;Abhd14b;Abhd14b;Abhd14b;Pcbp4;Pcbp4;Pcbp4;Pcbp4;Pcbp4;Pcbp4	-3196;-2548;-2489;-2389;-2381;-2381;-2381;-2381;-2381;-2381;-2350;-2323;-2323;-2323;0;0;0;0;0;-2383;-2819;-2819;-2820;-2821;-2838	25	5	20	11	9	2	10	6	4	5	5	0	10	10	0
chr9	106478001	106479000	1000	*	1.74471e-06	0.00137882	-28.312	Promoter (<=1kb)	9	106477309	106485415	8107	1	Rrp9	NM_145620.4	692	NM_001311150.1;NM_145619.3;XM_006511718.1;XM_006511720.1;XM_006511719.3;XR_001778888.1;XR_001778919.1;NM_145620.4	Parp3;Parp3;Parp3;Parp3;Parp3;Parp3;Rrp9;Rrp9	-1052;-1052;-1630;-1630;-1595;-1057;0;0	42	35	7	72	34	38	52	42	10	10	10	0	30	30	0
chr9	107546001	107547000	1000	*	4.42115e-06	0.00281927	32.2679	Promoter (<=1kb)	9	107545995	107551321	5327	1	Zmynd10	XM_017313107.1	6	NM_019720.4;XM_006511776.3;XM_006511775.3;XR_379826.2;XR_379769.1;XM_011242898.1;XM_011242897.1;XM_006511768.1;NM_018879.2;XM_006511769.3;NM_001243748.1;XM_006511770.2;XM_006511630.2;XM_017313105.1;XM_017313107.1;NM_053253.3	Cyb561d2;Cyb561d2;Cyb561d2;Gm34106;Nprl2;Nprl2;Nprl2;Nprl2;Nprl2;Nprl2;Rassf1;Rassf1;Zmynd10;Zmynd10;Zmynd10;Zmynd10	-4136;-4085;-3813;3781;3795;3795;3795;3795;3792;3760;-4555;-4585;0;0;0;-310	41	22	19	41	30	11	46	10	36	34	6	28	37	20	17
chr9	109832001	109833000	1000	*	4.16808e-06	0.00274308	-32.7366	Promoter (<=1kb)	9	109832710	109842974	10265	1	Nme6	XM_006512198.3	0	NR_033215.1;XM_006512198.3;XM_006512200.2;XM_006512197.1;NM_018757.1;XM_006512199.3	3000002C10Rik;Nme6;Nme6;Nme6;Nme6;Nme6	-570;0;0;0;0;-328	27	4	23	107	11	96	7	4	3	31	12	19	20	8	12
chr9	110953001	110954000	1000	*	1.98765e-06	0.00153431	-28.7726	Promoter (<=1kb)	9	110953453	110984066	30614	1	Lrrc2	XM_006512365.3	0	NM_028838.2;XM_006512365.3;XM_006512364.3	Lrrc2;Lrrc2;Lrrc2	0;0;0	68	8	60	53	5	48	48	16	32	18	9	9	46	16	30
chr9	114639001	114640000	1000	*	5.35026e-05	0.0169273	50.2564	Promoter (<=1kb)	9	114585874	114640200	54327	2	Cnot10	NM_153585.5	200	NM_153585.5;XM_006512399.3;XM_017313699.1;XR_871264.2	Cnot10;Cnot10;Cnot10;Cnot10	0;0;0;0	6	6	0	45	9	36	74	0	74	26	5	21	10	1	9
chr9	115393001	115394000	1000	*	1.76648e-05	0.00788511	28.9881	Promoter (<=1kb)	9	115391580	115394060	2481	2	Gm40581	XR_871316.1	60	XR_871316.1	Gm40581	0	17	17	0	32	28	4	5	5	0	5	4	1	14	2	12
chr9	119103001	119104000	1000	*	4.7232e-05	0.0153453	-34.4762	Promoter (<=1kb)	9	119102478	119147694	45217	1	Dlec1	NM_177117.3	523	XM_006512158.3;XM_006512157.3;XM_006512152.3;XM_006512153.3;XM_006512154.3;XM_006512155.3;XM_006512156.3;NM_177117.3	Dlec1;Dlec1;Dlec1;Dlec1;Dlec1;Dlec1;Dlec1;Dlec1	0;0;0;0;0;0;0;0	44	3	41	31	2	29	16	2	14	15	14	1	40	7	33
chr9	120930001	120931000	1000	*	1.29002e-05	0.00629837	-29.481	Promoter (<=1kb)	9	120924455	120930802	6348	2	4930593C16Rik	NR_040753.1	0	NR_040753.1;NM_007614.3;NM_001165902.1;XR_380012.1	4930593C16Rik;Ctnnb1;Ctnnb1;Gm38502	0;-2400;-2578;0	54	10	44	46	8	38	26	11	15	10	4	6	30	18	12
chr9	121796001	121797000	1000	*	0.000205023	0.0401696	32.4444	Promoter (<=1kb)	9	121788662	121795669	7008	2	Hhatl	XM_011243054.2	-332	XM_011242925.1;XM_006511904.2;NM_028384.1;XR_379845.1;XR_379844.1;XM_006511905.2;XM_006512381.2;NR_027967.1;XM_006512379.2;XM_006512380.3;NM_029095.2;XM_011243054.2;XM_006512296.3	Ccdc13;Ccdc13;Ccdc13;Ccdc13;Ccdc13;Ccdc13;Hhatl;Hhatl;Hhatl;Hhatl;Hhatl;Hhatl;Klhl40	42404;42506;42461;42514;42514;42514;-4917;-4881;-4523;-3779;-3494;-332;18868	15	15	0	25	24	1	10	5	5	6	4	2	5	4	1
chr9	121856001	121857000	1000	*	6.72913e-05	0.0195987	28.9394	Promoter (<=1kb)	9	121848560	121858000	9441	2	Higd1a	NM_019814.4	1000	NM_019814.4;XM_006512201.1	Higd1a;Higd1a	0;0	6	6	0	17	17	0	22	15	7	9	9	0	20	9	11
chr9	121938001	121939000	1000	*	2.25629e-05	0.00913784	-38.8128	Promoter (<=1kb)	9	121937275	121947016	9742	1	1700048O20Rik	NR_033553.1	726	NR_033553.1	1700048O20Rik	0	131	52	79	36	8	28	48	28	20	6	5	1	34	23	11
chrX	71197001	71198000	1000	*	0.000194375	0.0389	-30.7527	Promoter (<=1kb)	20	71197103	71198448	1346	1	Gm14730	Gm14730	0	Gm14730	Gm14730	0	10	6	4	62	42	20	10	10	0	22	22	0	31	26	5
chrX	78856001	78857000	1000	*	0.000126051	0.0295123	29.0722	Promoter (1-2kb)	20	78855011	78858295	3285	2	Gm5939	Gm5939	1295	Gm5939	Gm5939	0	121	96	25	70	54	16	56	22	34	5	2	3	236	161	75
chrX	136927001	136928000	1000	*	1.83171e-10	6.92592e-07	-21.8378	Promoter (<=1kb)	20	136927325	136928373	1049	1	H2bfm	NM_027067.2	0	Gm6275;NM_027067.2	Gm6275;H2bfm	-1409;0	172	49	123	139	75	64	190	85	105	84	60	24	252	184	68
chrX	155504001	155505000	1000	*	1.64142e-05	0.00747995	-23.3933	Promoter (<=1kb)	20	155504005	155504943	939	2	Gm8606	Gm8606	0	Gm8606	Gm8606	0	42	16	26	39	10	29	5	4	1	6	1	5	68	47	21
chrX	157569001	157570000	1000	*	6.75282e-05	0.0196398	-27.6295	Promoter (<=1kb)	20	157566119	157568985	2867	2	Yy2	NM_001098723.1	-16	NM_172307.3;NM_001098723.1	Mbtps2;Yy2	0;-16	16	10	6	42	11	31	36	15	21	5	5	0	101	75	26
chrX	169979001	169980000	1000	*	3.4009e-09	8.41342e-06	22.5292	Promoter (<=1kb)	20	169979209	169989623	10415	1	Mid1	XM_006528736.3	0	NR_029457.1;NM_001290512.1;NM_010797.3;XM_017318409.1;XM_011247789.2;NM_001290504.1;XR_878259.2;XM_017318408.1;XM_017318411.1;XM_017318412.1;NM_001290505.1;NM_001290506.1;XM_017318410.1;XM_017318413.1;XM_006528736.3;XM_006528737.3;XM_006528739.3	G530011O06Rik;Mid1;Mid1;Mid1;Mid1;Mid1;Mid1;Mid1;Mid1;Mid1;Mid1;Mid1;Mid1;Mid1;Mid1;Mid1;Mid1	-84;0;0;0;0;0;0;0;0;0;0;0;0;0;0;0;-37	743	505	238	417	273	144	47	17	30	125	47	78	415	244	171
