# Supplementary material for: Autism-like behaviors and abnormality of glucose metabolism in offspring derived from aging males with epigenetically modified sperm
Source: Aging (Albany NY). 2020 Oct 13;12(19):19766–84. doi: 10.18632/aging.104061 (PMC7732289; doi:10.18632/aging.104061)
Supplement: Supplementary Table 2 [file aging-12-104061-s003..xls]

## Sheet: sheet1
Supplementary Table 2. The information of differential methylation regions in whole genome between young and 18-month old male mice sperm.
seqnames	start	end	width	strand	pvalue	qvalue	meth.diff	annotation	geneChr	geneStart	geneEnd	geneLength	geneStrand	AccId	transcriptId	distanceToTSS	flank_txIds	flank_AccIds	flank_gene_distances	coverage_18 months old F0 Sperm-1	numCs_18 months old F0 Sperm-1	numTs_18 months old F0 Sperm-1	coverage_18 months old F0 Sperm-2	numCs_18 months old F0 Sperm-2	numTs_18 months old F0 Sperm-2	coverage_young F0 Sperm-1	numCs_young F0 Sperm-1	numTs_young F0 Sperm-1	coverage_young F0 Sperm-2	numCs_young F0 Sperm-2	numTs_young F0 Sperm-2	coverage_young F0 Sperm-3	numCs_young F0 Sperm-3	numTs_young F0 Sperm-3
NT_162750.1	107001	108000	1000	*	7.99908e-07	0.000817901	23.5241	Distal Intergenic	72	117215	120668	3454	1	LOC105242429	XR_880808.2	-9215	NM_033616.3	Csprs	55011	91	60	31	99	79	20	111	58	53	76	44	32	66	25	41
NT_166280.1	141001	142000	1000	*	0.000267077	0.0491131	-25.9091	Distal Intergenic	74	147776	156542	8767	1	LOC105242404	LOC105242404	-5776	XM_006535858.3	LOC101055672	25485	22	15	7	15	12	3	10	10	0	6	6	0	14	14	0
NT_166281.1	30001	31000	1000	*	5.89348e-05	0.0187333	28.4345	Promoter (2-3kb)	75	17602	27689	10088	2	LOC677525	XM_017318893.1	-2312	XR_001782933.1;XM_017318893.1	LOC108168675;LOC677525	0;-2312	21	20	1	38	36	2	17	13	4	6	4	2	23	13	10
NT_166338.1	13001	14000	1000	*	1.72541e-05	0.00806265	20.4136													119	100	19	141	110	31	118	76	42	33	14	19	32	24	8
NT_187029.1	27001	28000	1000	*	6.30955e-05	0.019705	40.6863	Promoter (<=1kb)	132	7825	27267	19443	2	4930438A08Rik	XM_003689172.5	0	XM_003689172.5	4930438A08Rik	0	14	14	0	5	5	0	10	5	5	17	9	8	8	6	2
chr10	4899001	4900000	1000	*	5.05859e-05	0.0169354	23.6171	Intron (NM_001302532.1/Esr1, intron 6 of 9)	10	5020192	5069063	48872	2	Syne1	NM_022027.2	169063	NM_001302532.1;NM_007956.5;XM_011243067.2;XM_011243066.2;XM_011243068.2;XM_006512435.2;XM_006512434.3;NM_001302533.1;NM_001302531.1;XM_006512433.3	Esr1;Esr1;Esr1;Esr1;Esr1;Esr1;Esr1;Esr1;Esr1;Esr1	0;0;0;0;0;0;0;0;0;0	33	33	0	21	20	1	33	29	4	21	13	8	36	26	10
chr10	5365001	5366000	1000	*	0.000186428	0.0395561	21.7942	Promoter (1-2kb)	10	5020203	5367948	347746	2	Syne1	XM_011243096.2	1948	XM_011243083.2;XM_011243096.2;XM_011243095.2;XM_011243094.2;XM_006512465.3;XM_011243089.2;XM_017314043.1;XM_017314048.1;XM_006512458.3;XM_011243084.2;XM_011243086.2;XM_011243090.2;XM_017314044.1;XM_011243091.2;XM_017314047.1;XM_017314046.1;XM_017314045.1;XM_011243093.1;XM_011243092.2;XM_011243097.2;NM_153399.2	Syne1;Syne1;Syne1;Syne1;Syne1;Syne1;Syne1;Syne1;Syne1;Syne1;Syne1;Syne1;Syne1;Syne1;Syne1;Syne1;Syne1;Syne1;Syne1;Syne1;Syne1	0;0;0;0;0;0;0;0;0;0;0;0;0;0;0;0;0;0;0;0;0	28	26	2	24	24	0	24	17	7	41	26	15	29	26	3
chr10	6513001	6514000	1000	*	0.000249827	0.0471106	-32.0833	Distal Intergenic	10	6401565	6404977	3413	1	LOC108167765	LOC108167765	111436	NA	NA	NA	12	8	4	16	10	6	10	9	1	14	14	0	13	13	0
chr10	6852001	6853000	1000	*	5.15534e-05	0.0171928	-28.7728	Intron (NM_001302795.1/Oprm1, intron 3 of 5)	10	6788576	7038209	249634	1	Oprm1	NM_001039652.2	63425	NM_001302794.1;NM_001302795.1;NM_001302796.1;XM_006512437.3;NM_001302793.1;NM_001304950.1;NM_001304955.1;NM_001039652.2	Oprm1;Oprm1;Oprm1;Oprm1;Oprm1;Oprm1;Oprm1;Oprm1	93408;0;0;0;63431;0;0;0	27	4	23	43	6	37	21	10	11	10	3	7	27	14	13
chr10	9576001	9577000	1000	*	2.94204e-11	1.67162e-07	42.1684	Intron (XM_017313970.1/Samd5, intron 1 of 1)	10	9627259	9675208	47950	2	Samd5	NM_177271.3	98208	XM_017313970.1	Samd5	0	59	52	7	40	33	7	66	29	37	25	8	17	114	61	53
chr10	9898001	9899000	1000	*	8.65561e-06	0.00488509	25.0596	Promoter (2-3kb)	10	9755547	9901040	145494	2	Stxbp5	NM_001081344.2	2040	XR_001779713.1;NM_001081344.2;XM_006512926.3;XM_006512927.3;XM_006512928.2;XR_001779636.1;XR_380094.2;XR_380096.3;XR_380092.2;XM_011243237.2;XM_011243238.2;XM_011243236.2	LOC108167793;Stxbp5;Stxbp5;Stxbp5;Stxbp5;Stxbp5;Stxbp5;Stxbp5;Stxbp5;Stxbp5;Stxbp5;Stxbp5	-2313;0;0;0;0;0;0;0;0;0;0;0	18	17	1	37	36	1	54	35	19	49	35	14	42	32	10
chr10	10718001	10719000	1000	*	4.42669e-05	0.015576	23.8787	Intron (XM_006512554.3/Grm1, intron 5 of 5)	10	10686059	10748725	62667	2	Grm1	XM_006512554.3	29725	XM_006512554.3;XM_006512550.3;XM_006512549.3;NM_001114333.2;NM_016976.3;XM_006512551.3	Grm1;Grm1;Grm1;Grm1;Grm1;Grm1	0;0;0;0;0;0	36	31	5	58	25	33	75	14	61	11	5	6	31	18	13
chr10	12883001	12884000	1000	*	0.000178552	0.0384894	-37.0092	Distal Intergenic	10	12382329	12869689	487361	2	Utrn	XM_006512710.3	-13312	NA	NA	NA	5	0	5	78	23	55	11	5	6	51	32	19	34	16	18
chr10	13469001	13470000	1000	*	3.43736e-06	0.0024999	41.5242	Intron (NM_001195065.1/Phactr2, intron 1 of 12)	10	13207717	13474396	266680	2	Phactr2	NM_001195065.1	4396	NM_001195065.1;XM_006512665.2;XM_006512667.2;XM_006512671.2;XM_006512674.2;XM_006512675.2;XM_006512676.2;XM_006512673.3;XM_006512666.1;XM_006512672.1	Phactr2;Phactr2;Phactr2;Phactr2;Phactr2;Phactr2;Phactr2;Phactr2;Phactr2;Phactr2	0;0;0;0;0;0;0;0;0;0	27	24	3	24	24	0	36	26	10	13	8	5	16	4	12
chr10	14018001	14019000	1000	*	1.65624e-05	0.0078235	-37.0366	Intron (XM_006512558.2/Hivep2, intron 2 of 9)	10	14003766	14150752	146987	1	Hivep2	XM_017313807.1	14235	XM_006512558.2;XM_011243129.2;XM_011243131.2;XM_011243132.2;XM_011243133.2;XM_017313809.1;XM_006512556.1;NM_010437.2;XM_006512559.2;XM_017313807.1	Hivep2;Hivep2;Hivep2;Hivep2;Hivep2;Hivep2;Hivep2;Hivep2;Hivep2;Hivep2	0;0;0;0;0;0;0;0;0;0	27	11	16	22	7	15	37	28	9	17	12	5	38	28	10
chr10	15476001	15477000	1000	*	1.87553e-05	0.00855624	-24.7436	Distal Intergenic	10	15548791	15671385	122595	1	LOC108167766	LOC108167766	-71791	NA	NA	NA	34	16	18	14	10	4	73	62	11	88	76	12	150	121	29
chr10	19338001	19339000	1000	*	0.000240288	0.0460676	35.6723	Distal Intergenic	10	19356539	19358604	2066	1	Olig3	NM_053008.2	-17539	NA	NA	NA	6	6	0	34	33	1	35	24	11	11	11	0	5	1	4
chr10	19486001	19487000	1000	*	1.27178e-06	0.00116464	67.8939	Promoter (<=1kb)	10	19486633	19507031	20399	1	Gm33104	XR_380141.3	0	XR_380141.3;XR_380142.3;XR_380140.2	Gm33104;Gm33104;Gm33104	0;0;0	8	8	0	23	18	5	16	4	12	5	0	5	31	12	19
chr10	20696001	20697000	1000	*	9.9977e-05	0.0265684	22.6927	Intron (NM_013875.5/Pde7b, intron 1 of 12)	10	20398004	20725068	327065	2	Pde7b	NM_013875.5	28068	NM_013875.5	Pde7b	0	65	52	13	45	40	5	60	39	21	33	20	13	57	34	23
chr10	21899001	21900000	1000	*	2.03536e-05	0.00904605	24.0776	Intron (NM_001161845.2/Sgk1, intron 1 of 13)	10	21874671	21882278	7608	2	LOC108167798	XR_001779732.1	-16723	NM_001161845.2	Sgk1	0	5	4	1	33	24	9	5	5	0	41	7	34	93	37	56
chr10	21995001	21996000	1000	*	8.80507e-10	3.26675e-06	-40.7012	Promoter (<=1kb)	10	21994666	21999903	5238	1	Sgk1	NM_011361.3	335	NM_001161845.2;NM_001161847.2;NM_001161848.2;NM_001161849.2;NM_001161850.2;NM_011361.3	Sgk1;Sgk1;Sgk1;Sgk1;Sgk1;Sgk1	0;0;0;0;0;0	48	0	48	66	18	48	58	28	30	30	21	9	76	34	42
chr10	22492001	22493000	1000	*	5.28236e-05	0.0174913	-54.1176	Distal Intergenic	10	22450488	22460954	10467	2	Gm40610	XR_871506.1	-31047	NA	NA	NA	10	2	8	10	2	8	5	5	0	5	2	3	17	14	3
chr10	22646001	22647000	1000	*	6.59065e-05	0.0202727	26.728	Promoter (<=1kb)	10	22645011	22703880	58870	1	Slc2a12	NM_178934.4	990	XM_011243176.2;XM_006512774.3;XM_006512775.3;NM_178934.4;XM_006512773.3	Slc2a12;Slc2a12;Slc2a12;Slc2a12;Slc2a12	0;0;0;0;-1778	21	21	0	5	5	0	23	19	4	37	15	22	30	29	1
chr10	25745001	25746000	1000	*	0.000194736	0.0406207	21.7886	Distal Intergenic	10	25698744	25714594	15851	2	Gm36543	XR_380209.3	-30407	NA	NA	NA	26	16	10	57	45	12	44	25	19	51	21	30	38	18	20
chr10	26107001	26108000	1000	*	1.08143e-08	2.71034e-05	-22.8818	Distal Intergenic	10	25991186	26079052	87867	2	Tmem200a	NM_029881.3	-27949	NA	NA	NA	57	34	23	56	22	34	43	35	8	5	2	3	46	44	2
chr10	26418001	26419000	1000	*	9.44356e-05	0.0257739	34.3627	Distal Intergenic	10	26434886	26502312	67427	1	Gm30034	XR_871557.2	-15886	NA	NA	NA	6	5	1	12	11	1	34	10	24	10	3	7	6	6	0
chr10	26800001	26801000	1000	*	4.07932e-06	0.00283877	20.4782	Intron (XR_001779622.1/Arhgap18, intron 1 of 15)	10	26772512	26918648	146137	1	Arhgap18	NM_176837.2	27489	XR_001779622.1;XM_006512885.3;NM_176837.2	Arhgap18;Arhgap18;Arhgap18	0;0;0	87	69	18	72	64	8	123	79	44	91	55	36	71	47	24
chr10	26839001	26840000	1000	*	4.0423e-05	0.0146274	45.0966	Intron (XR_001779622.1/Arhgap18, intron 1 of 15)	10	26772512	26918648	146137	1	Arhgap18	NM_176837.2	66489	XR_001779622.1;XM_006512885.3;NM_176837.2	Arhgap18;Arhgap18;Arhgap18	0;0;0	23	21	2	5	4	1	5	2	3	15	4	11	20	11	9
chr10	30845001	30846000	1000	*	2.5817e-06	0.00200442	-25.8439	Promoter (2-3kb)	10	30832359	30842783	10425	2	Hey2	NM_013904.1	-2218	NM_013904.1	Hey2	-2218	52	19	33	54	2	52	75	38	37	65	34	31	63	22	41
chr10	31136001	31137000	1000	*	0.000202324	0.0416198	26.5497	Distal Intergenic	10	31029203	31066231	37029	2	Gm30676	XR_380235.2	-69770	NA	NA	NA	5	5	0	30	30	0	19	14	5	6	4	2	10	8	2
chr10	31610001	31611000	1000	*	1.60254e-13	1.48383e-09	-50.8621	Promoter (<=1kb)	10	31501887	31609725	107839	2	Rnf217	NM_001146349.1	-276	NM_001146349.1	Rnf217	-276	20	10	10	29	14	15	34	34	0	15	15	0	21	21	0
chr10	31640001	31641000	1000	*	9.6812e-07	0.000945429	-52.3529	Distal Intergenic	10	31501887	31609725	107839	2	Rnf217	NM_001146349.1	-30276	NA	NA	NA	10	6	4	17	6	11	8	8	0	10	10	0	5	5	0
chr10	34036001	34037000	1000	*	0.000141456	0.0332915	-44.437	Promoter (<=1kb)	10	34037597	34109815	72219	1	Trappc3l	NM_001162937.1	-597	NM_001081165.1;NM_001162937.1	Fam26d;Trappc3l	7313;-597	25	3	22	39	18	21	21	18	3	29	13	16	10	9	1
chr10	34296001	34297000	1000	*	4.45148e-10	1.80222e-06	-49.2832	Promoter (<=1kb)	10	34230214	34297405	67192	2	Gm26564	XR_380239.2	405	XR_380239.2;XR_380238.2;NM_030203.2	Gm26564;Gm26564;Tspyl4	0;0;-421	15	5	10	55	11	44	31	20	11	15	12	3	24	20	4
chr10	35711001	35712000	1000	*	6.54402e-10	2.53644e-06	-25.824	Promoter (<=1kb)	10	35708691	35711891	3201	2	Amd2	NM_007444.3	0	NM_007444.3	Amd2	0	69	28	41	125	34	91	93	53	40	27	16	11	159	100	59
chr10	37451001	37452000	1000	*	5.15624e-05	0.0171928	24.2994	Distal Intergenic	10	37430435	37436975	6541	2	Gm31330	XR_380245.1	-14026	NA	NA	NA	46	42	4	63	57	6	10	6	4	40	25	15	22	17	5
chr10	37686001	37687000	1000	*	2.8352e-05	0.0114323	-37.283	Distal Intergenic	10	37430435	37436975	6541	2	Gm31330	XR_380245.1	-249026	NA	NA	NA	11	5	6	68	52	16	18	18	0	6	6	0	38	36	2
chr10	39730001	39731000	1000	*	4.53352e-05	0.0157962	-47.1472	Promoter (1-2kb)	10	39621411	39732007	110597	2	E130307A14Rik	NR_038037.1	1007	NR_038037.1;XR_380057.3;XM_017313854.1;XM_006512622.2;XM_006512623.3;XM_006512624.3;NM_011264.3	E130307A14Rik;Rev3l;Rev3l;Rev3l;Rev3l;Rev3l;Rev3l	0;-1069;-1069;-1075;-1075;-1075;-1160	28	8	20	98	20	78	43	14	29	6	6	0	17	14	3
chr10	40536001	40537000	1000	*	0.000148531	0.0343982	-20.1867	Distal Intergenic	10	40570321	40604135	33815	1	Slc22a16	XM_006512850.2	-33321	NA	NA	NA	30	14	16	77	18	59	32	23	9	16	3	13	16	12	4
chr10	40750001	40751000	1000	*	7.73676e-07	0.000797604	50.9787	Intron (XM_006512765.3/Mettl24, intron 4 of 4)	10	40683282	40811083	127802	1	Mettl24	NM_177793.3	66719	XM_006512765.3;XM_006512766.3;XM_006512768.3;XM_006512767.3;NM_177793.3	Mettl24;Mettl24;Mettl24;Mettl24;Mettl24	0;0;0;0;0	11	7	4	25	16	9	27	5	22	15	0	15	5	1	4
chr10	41019001	41020000	1000	*	3.3656e-06	0.00245748	-40.2483	Distal Intergenic	10	41047726	41055375	7650	2	Gm19611	Gm19611	35375	NA	NA	NA	51	16	35	32	5	27	12	11	1	10	4	6	47	28	19
chr10	41746001	41747000	1000	*	0.000246006	0.0468306	22.4965	Intron (NM_026643.5/Cep57l1, intron 1 of 9)	10	41774580	41780624	6045	1	BC048559	XR_871599.1	-27580	NM_026643.5;NM_001243075.1;NM_029132.2;NM_001243074.1	Cep57l1;Cep57l1;Cep57l1;Cep57l1	0;0;0;0	22	22	0	43	40	3	22	12	10	10	8	2	16	14	2
chr10	42449001	42450000	1000	*	0.000239801	0.0460447	22.5624	Intron (XM_017313883.1/Lace1, intron 2 of 12)	10	42312581	42455774	143194	2	Lace1	XM_017313883.1	5774	XM_017313883.1;XM_006512698.1;XM_006512697.3;NM_145743.2	Lace1;Lace1;Lace1;Lace1	0;0;0;0	67	48	19	63	51	12	38	27	11	33	14	19	44	21	23
chr10	42957001	42958000	1000	*	4.8969e-09	1.40716e-05	-51.4356	3' UTR	10	42940768	42960360	19593	1	Scml4	XM_006512756.3	16233	XM_006512752.3;XM_006512753.3;XM_006512750.3;XM_006512751.3;XM_011243174.2;NM_172938.3;XM_006512755.2;XM_006512757.2;XM_017313950.1;XM_006512756.3	Scml4;Scml4;Scml4;Scml4;Scml4;Scml4;Scml4;Scml4;Scml4;Scml4	0;0;0;0;0;0;0;0;0;0	72	30	42	42	13	29	56	42	14	17	15	2	5	5	0
chr10	42970001	42971000	1000	*	0.000173963	0.0378973	-30.4615	Distal Intergenic	10	42975770	42986086	10317	2	Gm5079	XR_380281.3	15086	XR_380281.3	Gm5079	15086	26	14	12	71	26	45	48	26	22	11	11	0	48	35	13
chr10	44170001	44171000	1000	*	0.000166161	0.0368536	25.257	Promoter (<=1kb)	10	44170447	44219585	49139	1	Speer5-ps1	NR_001582.2	0	NR_001582.2	Speer5-ps1	0	37	19	18	74	47	27	41	11	30	11	4	7	6	2	4
chr10	45470001	45471000	1000	*	4.70694e-05	0.016214	-30.5199	Promoter (<=1kb)	10	45376619	45470201	93583	2	Lin28b	NM_001031772.2	0	XM_011243183.2;XM_011243185.2;XM_011243180.2;XM_011243182.2;XM_011243186.2;XM_011243187.2;NM_001031772.2;XM_011243188.1	Lin28b;Lin28b;Lin28b;Lin28b;Lin28b;Lin28b;Lin28b;Lin28b	0;0;0;0;0;0;0;0	20	0	20	36	1	35	18	14	4	12	1	11	52	5	47
chr10	45889001	45890000	1000	*	8.83662e-05	0.024594	33.0159	Distal Intergenic	10	45875290	45876081	792	1	Gm7338	Gm7338	13711	NA	NA	NA	42	31	11	30	27	3	32	16	16	20	10	10	15	7	8
chr10	46011001	46012000	1000	*	0.000256293	0.047886	45.9756	Distal Intergenic	10	45875290	45876081	792	1	Gm7338	Gm7338	135711	NA	NA	NA	10	7	3	5	5	0	41	7	34	17	13	4	34	8	26
chr10	47356001	47357000	1000	*	2.27205e-05	0.00977624	25.2702	Distal Intergenic	10	47011708	47102790	91083	2	Gm35552	XR_871632.1	-253211	NA	NA	NA	103	63	40	85	52	33	62	15	47	64	20	44	155	81	74
chr10	48322001	48323000	1000	*	1.04454e-06	0.00100085	-39.8908	Distal Intergenic	10	48852426	48853526	1101	1	Gm3473	Gm3473	-529426	NA	NA	NA	37	17	20	54	27	27	19	17	2	5	4	1	17	16	1
chr10	53299001	53300000	1000	*	6.3907e-10	2.48665e-06	-20.8519	Promoter (<=1kb)	10	53298967	53300191	1225	2	Gm17823	Gm17823	191	XM_006512494.3;XM_017313743.1;XM_017313744.1;NM_001204983.1;Gm17823	Cep85l;Cep85l;Cep85l;Cep85l;Gm17823	0;0;0;0;0	102	2	100	136	20	116	107	27	80	83	14	69	110	50	60
chr10	53636001	53637000	1000	*	0.000233223	0.0452685	-24.8303	Intron (XM_006512889.3/Fam184a, intron 17 of 18)	10	53536315	53630627	94313	2	Mcm9	XR_380074.3	-5374	XM_006512889.3;XM_006512890.3;XM_006512891.3;XM_006512893.3;XM_006512894.3;XM_006512895.3;XM_006512896.3;XM_006512897.3;XM_006512898.3;XM_011243225.2;XM_017314133.1;XM_017314134.1;NM_001081428.1;XM_017314135.1;XM_017314136.1;XR_380088.3	Fam184a;Fam184a;Fam184a;Fam184a;Fam184a;Fam184a;Fam184a;Fam184a;Fam184a;Fam184a;Fam184a;Fam184a;Fam184a;Fam184a;Fam184a;Fam184a	0;0;0;0;0;0;0;0;0;0;0;0;0;0;0;0	34	17	17	52	29	23	39	33	6	44	33	11	68	50	18
chr10	54854001	54855000	1000	*	0.000109105	0.0281635	-24.7222	Distal Intergenic	10	55057202	55057570	369	1	Gm31849	Gm31849	-202202	NA	NA	NA	32	24	8	15	10	5	20	19	1	24	22	2	35	35	0
chr10	54927001	54928000	1000	*	0.000148827	0.0344268	21.1201	Distal Intergenic	10	55057202	55057570	369	1	Gm31849	Gm31849	-129202	NA	NA	NA	17	16	1	15	14	1	6	5	1	29	10	19	12	12	0
chr10	59502001	59503000	1000	*	1.92551e-05	0.00870484	-22.0341	Intron (XM_006513468.1/Mcu, intron 3 of 9)	10	59422960	59441779	18820	2	Oit3	NM_010959.2	-60222	XM_006513468.1;NM_001033259.4	Mcu;Mcu	0;0	85	48	37	172	87	85	34	29	5	38	28	10	161	109	52
chr10	59670001	59671000	1000	*	5.99693e-06	0.0037434	24.0741	Promoter (<=1kb)	10	59664554	59670208	5655	2	Gm40672	XR_871745.1	0	XR_871745.1;XR_871746.1	Gm40672;Gm40672	0;0	30	29	1	33	33	0	24	22	2	10	7	3	36	22	14
chr10	60759001	60760000	1000	*	3.47329e-05	0.0131771	-39.2917	Downstream (2-3kb)	10	60712072	60752849	40778	2	Slc29a3	XM_006514120.2	-6152	XM_006513028.3;NM_029770.2	Unc5b;Unc5b	71598;71581	18	17	1	16	3	13	24	22	2	25	24	1	5	5	0
chr10	61213001	61214000	1000	*	7.86262e-06	0.00453438	-33.6614	Promoter (1-2kb)	10	61215954	61219572	3619	1	Gm29861	XR_380475.2	-1954	NM_001081127.1;XR_380475.2;XR_380474.2;XR_871759.1	Adamts14;Gm29861;Gm29861;Gm29861	0;-1954;-3149;-3149	71	25	46	19	15	4	7	7	0	18	13	5	11	11	0
chr10	61599001	61600000	1000	*	0.000193286	0.040448	39.3715	Intron (NM_001177511.1/Npffr1, intron 1 of 3)	10	61595484	61626385	30902	1	Npffr1	NM_001177511.1	3517	NM_001177511.1	Npffr1	0	80	48	32	17	14	3	22	1	21	10	3	7	23	14	9
chr10	61649001	61650000	1000	*	1.37113e-09	4.81098e-06	-29.4805	Promoter (<=1kb)	10	61648621	61674165	25545	1	Ppa1	NM_026438.4	380	NM_026438.4	Ppa1	0	12	11	1	84	15	69	11	8	3	11	11	0	15	12	3
chr10	61827001	61828000	1000	*	1.94438e-08	4.45958e-05	20.0918	Distal Intergenic	10	61844488	61874240	29753	1	Gm40674	XR_871762.1	-16488	NA	NA	NA	192	129	63	208	161	47	165	90	75	85	38	47	197	113	84
chr10	62296001	62297000	1000	*	6.74709e-08	0.00011653	-45.3007	Exon (NM_001146100.1/Hk1, exon 5 of 18)	10	62269101	62327727	58627	2	Hk1	XM_006513247.1	30727	NM_001146100.1;NM_010438.3;XM_006513247.1;XM_006513246.3;XM_006513242.1;XM_006513243.3;XM_006513244.3;XM_006513245.3	Hk1;Hk1;Hk1;Hk1;Hk1;Hk1;Hk1;Hk1	0;0;0;0;0;0;0;0	50	3	47	5	2	3	15	13	2	34	13	21	5	4	1
chr10	63337001	63338000	1000	*	3.6732e-07	0.000437807	-22.1109	Promoter (1-2kb)	10	63319005	63339035	20031	2	Sirt1	NM_001159589.2	1035	NM_001159589.2;NM_019812.3	Sirt1;Sirt1	0;0	120	55	65	133	39	94	49	27	22	84	58	26	122	67	55
chr10	63870001	63871000	1000	*	2.0281e-05	0.00902583	20.9637	Intron (NM_177612.3/Ctnna3, intron 7 of 17)	10	63821055	65003667	1182613	1	Ctnna3	NM_001164519.1	48946	NM_177612.3;NM_001164376.1;XM_006513475.2;NM_001164519.1	Ctnna3;Ctnna3;Ctnna3;Ctnna3	0;0;0;0	68	67	1	60	59	1	5	3	2	15	14	1	43	34	9
chr10	65914001	65915000	1000	*	0.000253854	0.0476274	-20.0385	Distal Intergenic	10	65875663	65908250	32588	2	Gm30853	XR_871768.2	-5751	NA	NA	NA	60	22	38	27	16	11	42	34	8	28	16	12	44	29	15
chr10	66853001	66854000	1000	*	7.66443e-07	0.000792599	23.8755	Intron (XR_871778.1/Gm31416, intron 1 of 6)	10	66810940	66829667	18728	2	Gm40678	XR_871773.1	-23334	XR_871778.1;XR_871777.1;XR_871776.1;XR_380505.2;XR_380507.2;XR_871780.1;XR_871779.1;XR_871781.1	Gm31416;Gm31416;Gm31416;Gm31416;Gm31416;Gm31416;Gm31416;Gm31416	0;0;0;0;0;0;0;0	65	23	42	67	34	33	40	12	28	62	8	54	75	11	64
chr10	66901001	66902000	1000	*	3.14371e-07	0.000388592	-41.3384	Intron (XR_871778.1/Gm31416, intron 1 of 6)	10	66832185	66911531	79347	2	Gm31416	XR_871776.1	9531	XR_871778.1;XR_871777.1;XR_871776.1;XR_380505.2;XR_380507.2;XR_871780.1;XR_871779.1;XR_871781.1	Gm31416;Gm31416;Gm31416;Gm31416;Gm31416;Gm31416;Gm31416;Gm31416	0;0;0;0;0;0;0;0	24	22	2	43	0	43	15	14	1	5	5	0	44	30	14
chr10	67343001	67344000	1000	*	6.61574e-05	0.0203289	-31.8472	Distal Intergenic	10	67349979	67397213	47235	1	LOC108167817	XR_001779792.1	-5979	NA	NA	NA	15	0	15	79	20	59	83	38	45	102	36	66	82	43	39
chr10	67910001	67911000	1000	*	5.49384e-05	0.0180008	-38.6573	Promoter (1-2kb)	10	67886105	67912662	26558	2	Zfp365	NM_178679.2	1662	NM_178679.2	Zfp365	0	15	7	8	9	1	8	41	35	6	20	6	14	55	48	7
chr10	69048001	69049000	1000	*	4.45399e-05	0.0156176	25.4219	Distal Intergenic	10	69023840	69044506	20667	2	Gm33035	XR_001779809.1	-3495	XR_001779807.1;XR_871806.1;XR_001779809.1	Gm33035;Gm33035;Gm33035	-3495;-3495;-3495	15	12	3	76	46	30	48	8	40	24	21	3	56	17	39
chr10	69313001	69314000	1000	*	1.60745e-08	3.77566e-05	-27.1041	Promoter (<=1kb)	10	69312041	69315424	3384	1	Gm40685	XR_871809.1	960	XR_871809.1	Gm40685	0	57	20	37	95	30	65	85	51	34	71	41	30	129	82	47
chr10	69534001	69535000	1000	*	4.28392e-05	0.0152182	-24.744	Promoter (<=1kb)	10	69533708	70027436	493729	1	Ank3	NM_170730.2	293	XM_011243299.1;XM_017313769.1;NM_146005.3;NM_170688.2;NM_170689.2;NM_170690.2;NM_170728.2;NM_170729.2;NM_170730.2	Ank3;Ank3;Ank3;Ank3;Ank3;Ank3;Ank3;Ank3;Ank3	0;0;0;0;0;0;0;0;0	73	16	57	37	8	29	61	25	36	47	28	19	59	23	36
chr10	69662001	69663000	1000	*	2.71479e-08	5.80084e-05	60.4882	Intron (XM_011243299.1/Ank3, intron 1 of 47)	10	69705649	70024231	318583	1	Ank3	XM_017313775.1	-42649	XM_011243299.1;XM_017313769.1;NM_146005.3;NM_170688.2;NM_170689.2;NM_170690.2;NM_170728.2;NM_170729.2;NM_170730.2	Ank3;Ank3;Ank3;Ank3;Ank3;Ank3;Ank3;Ank3;Ank3	0;0;0;0;0;0;0;0;0	10	9	1	6	6	0	66	17	49	45	5	40	12	8	4
chr10	70149001	70150000	1000	*	9.69597e-05	0.0261646	-20.8887	Intron (XM_006514276.3/Ccdc6, intron 2 of 8)	10	70110237	70193200	82964	1	Ccdc6	XM_006514277.2	38764	XM_006514276.3;NM_001111121.1;XM_006514277.2	Ccdc6;Ccdc6;Ccdc6	0;0;0	54	41	13	11	8	3	33	30	3	39	39	0	38	36	2
chr10	70283001	70284000	1000	*	6.29589e-06	0.00386726	-46.7905	Exon (NM_025807.3/Slc16a9, exon 5 of 6)	10	70289772	70299682	9911	1	Gm40687	XR_001779811.1	-5772	NM_025807.3;XM_006513960.3	Slc16a9;Slc16a9	0;0	29	9	20	5	3	2	5	5	0	10	10	0	13	10	3
chr10	70734001	70735000	1000	*	1.71441e-09	5.88372e-06	-24.5659	Intron (XR_380559.2/Gm33979, intron 2 of 2)	10	70715249	70740447	25199	2	Gm33979	XR_380559.2	5447	XR_380559.2;XR_871816.1	Gm33979;Gm33979	0;5447	114	41	73	122	40	82	15	5	10	45	31	14	63	47	16
chr10	70917001	70918000	1000	*	1.50215e-05	0.00728287	-28.0663	Distal Intergenic	10	70868621	70910761	42141	1	4930533K18Rik	XR_871818.1	48380	XM_006514341.3	Bicc1	0	95	40	55	66	23	43	15	11	4	27	17	10	90	57	33
chr10	71146001	71147000	1000	*	9.38402e-06	0.00518454	-34.5338	Promoter (1-2kb)	10	71148163	71149809	1647	1	Gm32025	Gm32025	-1163	XM_006514341.3;NM_031397.2;Gm32025;XR_380561.2	Bicc1;Bicc1;Gm32025;Gm34137	0;0;-1163;20345	33	15	18	65	41	24	20	18	2	13	12	1	44	37	7
chr10	71438001	71439000	1000	*	2.33346e-05	0.00993806	-22.6018	Distal Intergenic	10	71482503	71483637	1135	1	LOC108167820	LOC108167820	-43503	NA	NA	NA	93	49	44	53	37	16	20	19	1	67	50	17	83	68	15
chr10	73327001	73328000	1000	*	0.00013137	0.0317166	-35.1953	Intron (XR_001779427.1/Pcdh15, intron 2 of 41)	10	73206167	74649831	1443665	1	Pcdh15	XR_001779433.1	120834	XR_001779427.1;XM_017313785.1;XR_001779435.1;XR_001779426.1;XR_001779429.1;XR_001779430.1;XR_001779431.1;XR_001779436.1;XR_001779437.1;XR_001779439.1;XR_001779441.1;XM_017313784.1;XM_006513155.3;XM_006513156.3;XR_001779428.1;XR_001779433.1	Pcdh15;Pcdh15;Pcdh15;Pcdh15;Pcdh15;Pcdh15;Pcdh15;Pcdh15;Pcdh15;Pcdh15;Pcdh15;Pcdh15;Pcdh15;Pcdh15;Pcdh15;Pcdh15	0;0;0;0;0;0;0;0;0;0;0;0;0;0;0;0	38	4	34	50	24	26	21	13	8	17	13	4	20	11	9
chr10	74388001	74389000	1000	*	6.04448e-05	0.0190798	-21.2041	Intron (XR_001779427.1/Pcdh15, intron 21 of 41)	10	74127544	74136884	9341	2	Gm40691	XR_871828.1	-251117	XR_001779427.1;XM_017313785.1;XR_001779435.1;XR_001779426.1;XR_001779429.1;XR_001779430.1;XR_001779431.1;XR_001779436.1;XR_001779437.1;XR_001779439.1;XR_001779441.1;XM_017313784.1;XM_006513155.3;XM_006513156.3;XR_001779428.1;XR_001779433.1;XR_001779432.1;XR_001779434.1;XR_001779438.1;XR_001779440.1;NM_001142747.1;NM_001142748.1;NM_001142735.1;NM_001142736.1;NM_001142737.1;NM_001142738.1;NM_001142…	Pcdh15;Pcdh15;Pcdh15;Pcdh15;Pcdh15;Pcdh15;Pcdh15;Pcdh15;Pcdh15;Pcdh15;Pcdh15;Pcdh15;Pcdh15;Pcdh15;Pcdh15;Pcdh15;Pcdh15;Pcdh15;Pcdh15;Pcdh15;Pcdh15;Pcdh15;Pcdh15;Pcdh15;Pcdh15;Pcdh15;Pcdh15;Pcdh15;Pcdh15;Pcdh15;Pcdh15;Pcdh15;Pcdh15;Pcdh15;Pcdh15	0;0;0;0;0;0;0;0;0;0;0;0;0;0;0;0;0;0;0;0;0;0;0;0;0;0;0;0;0;0;0;0;0;0;0	78	31	47	43	30	13	44	28	16	33	30	3	60	44	16
chr10	74462001	74463000	1000	*	0.000260991	0.0484123	-31.1772	Intron (XR_001779427.1/Pcdh15, intron 24 of 41)	10	74127544	74136884	9341	2	Gm40691	XR_871828.1	-325117	XR_001779427.1;XM_017313785.1;XR_001779435.1;XR_001779426.1;XR_001779429.1;XR_001779430.1;XR_001779431.1;XR_001779436.1;XR_001779437.1;XR_001779439.1;XR_001779441.1;XM_017313784.1;XM_006513155.3;XM_006513156.3;XR_001779428.1;XR_001779433.1;XR_001779432.1;XR_001779434.1;XR_001779438.1;XR_001779440.1;NM_001142747.1;NM_001142748.1;NM_001142735.1;NM_001142736.1;NM_001142737.1;NM_001142738.1;NM_001142…	Pcdh15;Pcdh15;Pcdh15;Pcdh15;Pcdh15;Pcdh15;Pcdh15;Pcdh15;Pcdh15;Pcdh15;Pcdh15;Pcdh15;Pcdh15;Pcdh15;Pcdh15;Pcdh15;Pcdh15;Pcdh15;Pcdh15;Pcdh15;Pcdh15;Pcdh15;Pcdh15;Pcdh15;Pcdh15;Pcdh15;Pcdh15;Pcdh15;Pcdh15;Pcdh15;Pcdh15;Pcdh15;Pcdh15;Pcdh15;Pcdh15	0;0;0;0;0;0;0;0;0;0;0;0;0;0;0;0;0;0;0;0;0;0;0;0;0;0;0;0;0;0;0;0;0;0;0	36	20	16	21	5	16	56	39	17	45	37	8	28	17	11
chr10	76992001	76993000	1000	*	4.28553e-11	2.27954e-07	-34.5113	Promoter (<=1kb)	10	76963936	76991410	27475	2	Gm35721	XR_380585.2	-591	XR_380585.2	Gm35721	-591	65	40	25	70	40	30	38	35	3	35	34	1	39	36	3
chr10	77283001	77284000	1000	*	2.94861e-05	0.0117788	-26.7762	Distal Intergenic	10	77259300	77269586	10287	1	Pofut2	NM_030262.3	23701	NA	NA	NA	21	5	16	5	5	0	5	5	0	22	21	1	17	12	5
chr10	78628001	78629000	1000	*	1.55888e-09	5.41278e-06	-23.9807	Distal Intergenic	10	78611669	78618074	6406	2	Olfr1357	NM_001011737.2	-9927	NA	NA	NA	124	55	69	16	7	9	35	34	1	5	1	4	23	20	3
chr10	79577001	79578000	1000	*	1.70095e-05	0.00798566	-20.279	Intron (NM_011583.3/Theg, intron 7 of 7)	10	79578575	79587135	8561	2	Theg	XM_006513579.3	9135	NM_011583.3;NM_199226.1;XM_006513579.3	Theg;Theg;Theg	0;0;9135	17	15	2	40	22	18	46	43	3	26	23	3	32	30	2
chr10	80398001	80399000	1000	*	1.00606e-07	0.00015769	39.3849	Promoter (<=1kb)	10	80392539	80399494	6956	2	Mbd3	XM_006513303.3	494	XR_380610.2;XM_006513303.3;XM_006513301.3;NM_001306143.1;NM_013595.3;NM_025650.2	Gm30823;Mbd3;Mbd3;Mbd3;Mbd3;Uqcr11	10241;0;0;0;0;7821	10	5	5	36	14	22	5	0	5	80	3	77	35	4	31
chr10	82921001	82922000	1000	*	0.000134357	0.0321737	51.1111	Distal Intergenic	10	82927003	82934640	7638	2	Gm33781	XR_380633.2	12640	NA	NA	NA	7	7	0	5	5	0	10	3	7	5	5	0	6	1	5
chr10	83028001	83029000	1000	*	5.18221e-06	0.00335189	-31.3177	Intron (XM_006513909.3/Chst11, intron 1 of 2)	10	83033428	83195904	162477	1	Chst11	XM_006513908.3	-4428	XM_006513909.3;NM_021439.2;XM_006513908.3	Chst11;Chst11;Chst11	0;0;-4428	34	20	14	21	3	18	10	4	6	30	21	9	47	44	3
chr10	83198001	83199000	1000	*	4.42164e-05	0.0155702	-23.9961	Distal Intergenic	10	83230848	83322991	92144	2	Slc41a2	XM_011243498.2	123991	XM_006513909.3;NM_021439.2;XM_006513908.3	Chst11;Chst11;Chst11	0;0;164573	54	13	41	33	6	27	36	13	23	42	12	30	58	41	17
chr10	83533001	83534000	1000	*	2.12536e-07	0.000283003	-55.7265	Promoter (<=1kb)	10	83487447	83534140	46694	2	Aldh1l2	NM_153543.2	140	NM_153543.2;XR_001779502.1	Aldh1l2;Aldh1l2	0;0	10	0	10	46	0	46	26	1	25	6	5	1	10	8	2
chr10	85458001	85459000	1000	*	1.70099e-12	1.25589e-08	-53.0583	Intron (XM_006514230.3/Btbd11, intron 1 of 14)	10	85386814	85660292	273479	1	Btbd11	NM_028709.2	71187	XM_006514230.3;NM_028709.2	Btbd11;Btbd11	0;0	17	4	13	70	34	36	50	41	9	16	14	2	46	45	1
chr10	86972001	86973000	1000	*	3.16978e-06	0.00236103	-47.8985	Exon (NM_138673.2/Stab2, exon 6 of 69)	10	86999957	87000729	773	1	LOC108167826	LOC108167826	-26957	NM_138673.2	Stab2	0	40	2	38	52	2	50	37	4	33	5	5	0	26	12	14
chr10	87125001	87126000	1000	*	0.000150085	0.0346211	22.5794	Intron (NM_029685.1/1700113H08Rik, intron 3 of 5)	10	87018926	87058829	39904	2	Gm36807	XM_011243646.2	-66172	NM_029685.1;XM_017314143.1;XM_017314145.1	1700113H08Rik;1700113H08Rik;1700113H08Rik	0;0;0	28	27	1	28	26	2	30	18	12	5	4	1	21	16	5
chr10	88147001	88148000	1000	*	1.51539e-07	0.000215868	-46.9927	Promoter (<=1kb)	10	88147071	88178395	31325	1	Nup37	NM_028334.4	0	XM_006514057.2;NM_027191.2;NM_028334.4;NM_029249.2;XM_011243597.1;XM_006514267.3;XM_006514269.3;XM_006514268.3;XM_017314130.1;XM_017314131.1;XM_017314132.1	Nup37;Nup37;Nup37;Parpbp;Parpbp;Parpbp;Parpbp;Parpbp;Parpbp;Parpbp;Parpbp	0;0;0;-60;-2980;-63;-62;-55;-64;-65;-65	26	16	10	25	1	24	56	46	10	21	12	9	10	10	0
chr10	88368001	88369000	1000	*	1.8358e-05	0.00841229	-23.197	Exon (XR_871935.2/Gm40733, exon 4 of 4)	10	88322801	88364383	41583	2	Dram1	XM_011243576.1	-3618	XM_011243576.1;XR_871935.2;XR_871933.2;XR_871934.2;XR_871932.2;XR_001779838.1	Dram1;Gm40733;Gm40733;Gm40733;Gm40733;Gm40734	-3618;0;0;0;0;0	71	49	22	48	28	20	50	45	5	35	29	6	49	43	6
chr10	88459001	88460000	1000	*	3.88989e-09	1.15771e-05	-35.5436	Promoter (<=1kb)	10	88459587	88473236	13650	1	Sycp3	NM_011517.2	0	NM_011517.2	Sycp3	0	65	8	57	6	1	5	70	30	40	25	11	14	68	43	25
chr10	88613001	88614000	1000	*	2.97911e-05	0.01186	30.9021	Distal Intergenic	10	88518483	88605236	86754	2	Mybpc1	XR_001779415.1	-7765	NA	NA	NA	40	18	22	27	14	13	35	7	28	25	1	24	7	2	5
chr10	89462001	89463000	1000	*	2.75529e-05	0.0111958	-27.0112	Intron (NM_001163700.1/Nr1h4, intron 7 of 8)	10	89408822	89444374	35553	2	Gas2l3	XM_011243445.1	-17627	NM_001163700.1;NM_009108.2;NM_001163504.1;XM_006513391.3;XM_006513393.3;XR_001779493.1	Nr1h4;Nr1h4;Nr1h4;Nr1h4;Nr1h4;Nr1h4	0;0;0;0;0;0	37	28	9	49	21	28	26	21	5	16	15	1	51	43	8
chr10	89694001	89695000	1000	*	5.38228e-05	0.0177282	-25.305	Intron (NR_130956.1/1500026H17Rik, intron 2 of 2)	10	89686363	89700866	14504	1	1500026H17Rik	NR_130956.1	7638	NR_130956.1	1500026H17Rik	0	67	19	48	21	10	11	32	20	12	28	17	11	27	18	9
chr10	89731001	89732000	1000	*	2.32143e-06	0.00184288	31.14	Promoter (<=1kb)	10	89711966	89732245	20280	2	Actr6	XM_006513965.1	245	XM_006513965.1;XM_017314062.1;XM_006513966.3;XM_006513967.3;XM_011243532.2;XM_017314063.1;NM_025914.2;XR_871945.2;XR_001779839.1;XR_001779840.1	Actr6;Actr6;Actr6;Actr6;Actr6;Actr6;Actr6;Gm30963;Gm30963;Gm30963	0;0;0;0;0;0;0;8397;9413;9413	21	20	1	55	46	9	47	0	47	44	34	10	42	41	1
chr10	90401001	90402000	1000	*	9.62293e-05	0.0260361	-23.4724	Intron (XM_006514307.3/Anks1b, intron 12 of 16)	10	90575727	90972985	397259	1	Anks1b	NM_001177397.1	-173727	XM_006514307.3;XM_006514311.2;XM_006514310.2;XM_006514308.2;XM_006514309.2;XM_006514304.2;XM_006514303.2;XM_017314153.1;XM_017314148.1;XM_017314150.1;XM_006514301.2;XM_006514302.2;XM_006514305.3;XM_006514306.2;XM_017314149.1;XM_017314151.1;XM_017314152.1;XM_017314154.1;XM_017314155.1;NM_001128086.2;XM_017314156.1	Anks1b;Anks1b;Anks1b;Anks1b;Anks1b;Anks1b;Anks1b;Anks1b;Anks1b;Anks1b;Anks1b;Anks1b;Anks1b;Anks1b;Anks1b;Anks1b;Anks1b;Anks1b;Anks1b;Anks1b;Anks1b	0;0;0;0;0;0;0;0;0;0;0;0;0;0;0;0;0;0;0;0;0	32	25	7	7	5	2	66	64	2	12	12	0	45	44	1
chr10	90577001	90578000	1000	*	0.000144436	0.0337783	28.1099	Promoter (<=1kb)	10	90576693	90971673	394981	1	Anks1b	XM_006514313.3	308	XM_006514307.3;XM_006514311.2;XM_006514310.2;XM_006514308.2;XM_006514309.2;XM_006514304.2;XM_006514303.2;XM_017314153.1;XM_017314148.1;XM_017314150.1;XM_006514301.2;XM_006514302.2;XM_006514305.3;XM_006514306.2;XM_017314149.1;XM_017314151.1;XM_017314152.1;XM_017314154.1;XM_017314155.1;NM_001128086.2;XM_017314156.1;NM_001177397.1;XM_017314157.1;NM_001177396.1;NM_001177398.1;NM_181398.3;XM_006514312…	Anks1b;Anks1b;Anks1b;Anks1b;Anks1b;Anks1b;Anks1b;Anks1b;Anks1b;Anks1b;Anks1b;Anks1b;Anks1b;Anks1b;Anks1b;Anks1b;Anks1b;Anks1b;Anks1b;Anks1b;Anks1b;Anks1b;Anks1b;Anks1b;Anks1b;Anks1b;Anks1b;Anks1b	0;0;0;0;0;0;0;0;0;0;0;0;0;0;0;0;0;0;0;0;0;0;0;0;0;0;0;0	66	55	11	29	28	1	11	6	5	21	14	7	56	36	20
chr10	91101001	91102000	1000	*	0.000107184	0.0278908	23.5354	Promoter (<=1kb)	10	91100352	91102613	2262	1	Ikbip	XM_011243536.2	649	XM_017314068.1;XR_001779582.1;NM_026166.2;NM_027078.2;XM_011243536.2	Ikbip;Ikbip;Ikbip;Ikbip;Ikbip	18310;0;17962;0;0	14	14	0	11	11	0	10	9	1	11	9	2	33	19	14
chr10	91559001	91560000	1000	*	9.83502e-07	0.000954857	24.5541	Distal Intergenic	10	91410595	91439619	29025	1	Gm40736	XR_871947.1	148406	NA	NA	NA	42	40	2	35	34	1	25	11	14	5	4	1	11	10	1
chr10	93279001	93280000	1000	*	0.000123849	0.0304751	31.0943	Intron (NM_001282967.1/Elk3, intron 2 of 3)	10	93284984	93285888	905	1	Gm32551	XR_871953.2	-4984	NM_001282967.1;NM_001322265.1;NM_001322268.1;NM_013508.2;XR_871953.2;XR_001779841.1	Elk3;Elk3;Elk3;Elk3;Gm32551;Gm32551	0;0;0;0;-4984;-4984	26	24	2	16	16	0	28	20	8	10	8	2	16	7	9
chr10	94237001	94238000	1000	*	7.75016e-05	0.0225707	22.0267	Promoter (<=1kb)	10	94230565	94238611	8047	2	Gm32749	XR_871958.1	611	XR_380685.2;XR_380686.2;XR_871956.1;XR_871957.1;XR_871958.1	Gm32749;Gm32749;Gm32749;Gm32749;Gm32749	-3867;-3867;-3867;-3867;0	45	19	26	88	57	31	80	41	39	117	31	86	12	2	10
chr10	94671001	94672000	1000	*	8.30739e-05	0.0235871	-57.7778	Downstream (1-2kb)	10	94688498	94768913	80416	1	Cep83	XM_006514300.3	-16498	NR_015524.1	Cep83os	16613	5	1	4	5	3	2	15	14	1	11	11	0	6	6	0
chr10	95175001	95176000	1000	*	1.02118e-07	0.00015931	-64.2172	3' UTR	10	95120582	95145825	25244	2	Gm29684	NR_131146.1	-29176	XM_006513178.3;XM_006513181.3;XM_006513180.2;XM_006513182.2;XM_006513179.1;NM_009950.2	Cradd;Cradd;Cradd;Cradd;Cradd;Cradd	0;0;0;0;0;0	36	7	29	10	4	6	5	5	0	11	9	2	5	5	0
chr10	95371001	95372000	1000	*	2.01115e-06	0.0016659	-27.807	Distal Intergenic	10	95336276	95363216	26941	1	2310039L15Rik	NR_045337.1	34725	NA	NA	NA	45	18	27	99	46	53	11	7	4	25	17	8	54	44	10
chr10	95466001	95467000	1000	*	1.40427e-08	3.38378e-05	-42.927	Distal Intergenic	10	95476989	95478414	1426	2	Gm3619	Gm3619	11414	NA	NA	NA	27	4	23	40	10	30	41	32	9	22	10	12	20	13	7
chr10	95547001	95548000	1000	*	2.42648e-06	0.00190911	-24.2691	3' UTR	10	95559244	95559264	21	2	Mir3058	NA	11264	NM_027722.4;XM_006514116.2;NM_080560.3;XM_006514344.3	Nudt4;Nudt4;Ube2n;Ube2n	0;0;31839;31410	10	8	2	37	23	14	57	56	1	22	22	0	41	36	5
chr10	95635001	95636000	1000	*	2.2075e-05	0.00958102	-27.4699	Promoter (2-3kb)	10	95630503	95632244	1742	2	Gm33336	XR_871967.1	-2757	XR_871967.1	Gm33336	-2757	26	22	4	26	11	15	39	36	3	61	55	6	31	28	3
chr10	95844001	95845000	1000	*	4.66845e-06	0.00311854	-26.2987	Promoter (<=1kb)	10	95823970	95843156	19187	2	Gm33543	XR_871971.1	-845	XR_380700.2;XR_871968.1;XR_001779844.1;XR_001779845.1;XR_380705.2;XR_380706.2;XR_380707.2;XR_380709.2;XR_871970.1;XR_871971.1	Gm33377;Gm33377;Gm33543;Gm33543;Gm33543;Gm33543;Gm33543;Gm33543;Gm33543;Gm33543	0;-2797;-845;-845;-845;-845;-845;-845;-845;-845	11	6	5	28	26	2	58	58	0	54	54	0	11	11	0
chr10	96214001	96215000	1000	*	2.2099e-08	4.90715e-05	-32.7807	Distal Intergenic	10	96226207	96248708	22502	1	4930459C07Rik	NR_110448.1	-11207	NA	NA	NA	129	28	101	57	6	51	53	30	23	21	11	10	61	23	38
chr10	96854001	96855000	1000	*	1.89336e-05	0.00861793	23.6098	Distal Intergenic	10	96901326	96920191	18866	1	LOC108167830	XM_017314191.1	-46326	NA	NA	NA	21	21	0	34	34	0	41	30	11	52	52	0	25	14	11
chr10	97214001	97215000	1000	*	4.15701e-05	0.0149376	20.3414	Intron (XR_380716.2/Gm34044, intron 2 of 3)	10	97207387	97235757	28371	2	Gm34044	XR_380716.2	20757	XR_380716.2	Gm34044	0	36	35	1	32	31	1	58	45	13	51	35	16	87	73	14
chr10	97507001	97508000	1000	*	0.000239722	0.0460384	-29.0226	Exon (NM_001190451.2/Dcn, exon 5 of 8)	10	97482331	97518163	35833	1	Dcn	NM_007833.6	24670	NM_001190451.2;NM_007833.6	Dcn;Dcn	0;0	111	54	57	61	31	30	53	32	21	16	15	1	28	23	5
chr10	98417001	98418000	1000	*	2.76155e-05	0.0112167	39.783	Distal Intergenic	10	98299927	98351867	51941	2	Gm8633	NR_045179.1	-65134	NA	NA	NA	15	15	0	9	8	1	31	12	19	39	21	18	35	25	10
chr10	98799001	98800000	1000	*	3.04662e-05	0.012037	33.255	Distal Intergenic	10	98807136	98809465	2330	1	Gm40750	XR_871989.1	-7136	NA	NA	NA	45	23	22	43	30	13	20	6	14	23	2	21	21	9	12
chr10	98917001	98918000	1000	*	7.72381e-05	0.0225342	37.7262	Promoter (1-2kb)	10	98915152	99026143	110992	1	Atp2b1	NM_026482.2	1849	XR_001779588.1;XR_001779589.1;XR_001779587.1;XM_017314072.1;XM_006514015.3;XM_011243549.2;XM_011243548.2;XM_017314071.1;NM_026482.2	Atp2b1;Atp2b1;Atp2b1;Atp2b1;Atp2b1;Atp2b1;Atp2b1;Atp2b1;Atp2b1	0;0;0;0;0;0;0;0;0	14	10	4	33	23	10	34	14	20	25	6	19	15	5	10
chr10	99280001	99281000	1000	*	3.52003e-09	1.07318e-05	39.0127	Distal Intergenic	10	99266864	99270910	4047	2	Gm34921	XR_380738.3	-9091	NA	NA	NA	29	27	2	38	36	2	20	13	7	36	8	28	40	31	9
chr10	99408001	99409000	1000	*	2.32203e-06	0.00184288	-37.058	Distal Intergenic	10	99443838	99447029	3192	1	Gad1-ps	Gad1-ps	-34838	NA	NA	NA	58	8	50	40	18	22	33	12	21	16	12	4	25	22	3
chr10	99418001	99419000	1000	*	1.04489e-06	0.00100085	-20.0868	Distal Intergenic	10	99443838	99447029	3192	1	Gad1-ps	Gad1-ps	-24838	NA	NA	NA	101	16	85	101	32	69	88	33	55	84	31	53	112	64	48
chr10	100613001	100614000	1000	*	6.4057e-07	0.00068291	34.3735	Intron (XM_006513956.2/1700017N19Rik, intron 12 of 13)	10	100594352	100618387	24036	1	1700017N19Rik	XM_006513955.2	18649	XM_006513956.2;XM_017314058.1;NM_001081246.1;XM_006513955.2	1700017N19Rik;1700017N19Rik;1700017N19Rik;1700017N19Rik	0;0;0;0	12	10	2	17	17	0	41	15	26	17	6	11	6	6	0
chr10	102616001	102617000	1000	*	8.90664e-09	2.32299e-05	-31.1125	Distal Intergenic	10	102540128	102549737	9610	1	Rassf9	XM_006513632.3	75873	NA	NA	NA	79	47	32	73	42	31	33	33	0	58	53	5	80	62	18
chr10	105715001	105716000	1000	*	0.000123945	0.0304833	-26.754	Distal Intergenic	10	105763191	105841158	77968	2	Mettl25	XM_011243418.1	125158	NA	NA	NA	50	18	32	38	7	31	54	34	20	17	6	11	11	7	4
chr10	106021001	106022000	1000	*	0.000224937	0.0442759	-33.87	Distal Intergenic	10	105841479	105847510	6032	1	Ccdc59	NM_025602.3	179522	NA	NA	NA	50	23	27	32	21	11	5	5	0	7	6	1	30	25	5
chr10	107593001	107594000	1000	*	0.000201981	0.041577	22.1809	Intron (XR_872011.1/Gm36177, intron 3 of 5)	10	107495268	107659403	164136	1	Gm36177	XR_872011.1	97733	XR_872011.1;XM_017313939.1;NM_001081432.1;XM_006513635.1;XM_017313938.1	Gm36177;Ptprq;Ptprq;Ptprq;Ptprq	0;0;0;0;0	29	26	3	36	30	6	43	20	23	16	12	4	21	15	6
chr10	108130001	108131000	1000	*	4.00171e-06	0.00280446	-36.7077	Distal Intergenic	10	108150495	108160437	9943	2	Gm40754	XR_872012.2	29437	NA	NA	NA	74	32	42	90	41	49	24	21	3	11	10	1	57	37	20
chr10	108406001	108407000	1000	*	0.000160087	0.0359747	23.5786	Intron (NM_054056.2/Pawr, intron 4 of 6)	10	108436388	108453296	16909	1	Gm36283	XR_380768.2	-29388	NM_054056.2	Pawr	0	35	35	0	20	20	0	46	40	6	26	24	2	10	5	5
chr10	109012001	109013000	1000	*	3.68182e-05	0.0137433	-38.1316	Promoter (1-2kb)	10	108497650	109010978	513329	2	Syt1	XM_017313867.1	-1023	XM_017313866.1;XM_017313868.1;XM_006513446.1;XM_006513449.1;NM_001252341.1;NM_001252342.1;NM_009306.3;XM_017313867.1	Syt1;Syt1;Syt1;Syt1;Syt1;Syt1;Syt1;Syt1	-2917;-2916;-2895;-2895;-1026;-1026;-1026;-1023	17	9	8	33	13	20	19	16	3	11	10	1	18	14	4
chr10	109852001	109853000	1000	*	0.000166507	0.0368949	-22.243	Promoter (<=1kb)	10	109681573	109852770	171198	2	Nav3	XM_011243454.1	0	XM_011243454.1;XM_006513676.2;XM_006513677.2;XM_017313945.1;XM_006513679.2;XM_006513680.2;XM_017313946.1;XM_017313947.1;NM_001081035.1;XM_006513675.3	Nav3;Nav3;Nav3;Nav3;Nav3;Nav3;Nav3;Nav3;Nav3;Nav3	0;0;0;0;0;0;0;0;0;0	46	6	40	105	23	82	26	7	19	59	17	42	41	26	15
chr10	110890001	110891000	1000	*	8.78952e-05	0.024497	30.7568	Intron (NR_045979.1/1700020G17Rik, intron 2 of 2)	10	110801174	110896507	95334	2	1700020G17Rik	NR_045979.1	5507	NR_045979.1	1700020G17Rik	0	16	15	1	32	30	2	5	2	3	49	24	25	27	27	0
chr10	111114001	111115000	1000	*	2.06715e-05	0.00916289	-26.9481	Distal Intergenic	10	111125836	111126795	960	1	Rpl6l	Rpl6l	-10836	NA	NA	NA	48	27	21	50	10	40	14	9	5	51	31	20	67	47	20
chr10	111502001	111503000	1000	*	5.02897e-05	0.0168757	52.2483	Promoter (1-2kb)	10	111500788	111501345	558	1	Gm5176	NR_033603.1	1213	NR_033603.1;XM_006513893.3;XR_001779558.1;NM_001146707.1;XM_006513890.3;NM_009344.3	Gm5176;Nap1l1;Nap1l1;Nap1l1;Nap1l1;Phlda1	1213;28810;28802;21384;20782;-3286	5	5	0	18	15	3	11	6	5	12	3	9	31	12	19
chr10	111595001	111596000	1000	*	0.000228738	0.0446948	-29.6952	Promoter (<=1kb)	10	111595121	111611352	16232	1	Gm30262	XR_380797.3	0	NR_045344.1;XR_380793.3;XR_380794.3;XR_001779640.1;XR_380797.3;XR_872041.1;XR_380792.2;XR_380796.2;XR_872036.1;XR_872037.1;XR_380798.3;XR_872040.2	4933440J02Rik;Gm30262;Gm30262;Gm30262;Gm30262;Gm30262;Gm30262;Gm30262;Gm30262;Gm30262;Gm30262;Gm30262	-728;0;0;0;0;0;0;0;0;-1753;-3462;-3726	11	4	7	40	5	35	24	12	12	5	3	2	21	11	10
chr10	112458001	112459000	1000	*	9.82513e-08	0.000154726	-24.111	3' UTR	10	112307854	112466304	158451	1	Kcnc2	XM_011243456.2	150147	XM_006513693.3;XM_006513695.3;XM_006513694.3;XM_006513691.3;XM_006513692.3;XM_011243455.2;XM_006513685.3;XM_006513687.3;XM_006513690.2;XM_006513688.1;NM_001025581.1;XM_017313951.1;XM_006513689.3;XM_011243456.2	Kcnc2;Kcnc2;Kcnc2;Kcnc2;Kcnc2;Kcnc2;Kcnc2;Kcnc2;Kcnc2;Kcnc2;Kcnc2;Kcnc2;Kcnc2;Kcnc2	0;0;0;0;0;0;0;0;0;0;0;0;0;0	136	54	82	110	46	64	66	45	21	52	34	18	190	116	74
chr10	112717001	112718000	1000	*	0.000127773	0.0311642	-22.706	Distal Intergenic	10	112726926	112785599	58674	1	1700010J16Rik	NR_040579.1	-8926	NA	NA	NA	64	21	43	73	23	50	135	66	69	23	14	9	93	51	42
chr10	112801001	112802000	1000	*	0.000164364	0.0365904	27.9711	Distal Intergenic	10	112837733	112845807	8075	1	Gm3942	XR_380806.1	-35733	NA	NA	NA	43	26	17	51	19	32	62	11	51	71	27	44	29	2	27
chr10	113370001	113371000	1000	*	9.4391e-06	0.00521209	-30.1385	Distal Intergenic	10	113561570	113566203	4634	2	Gm40765	XR_872045.1	195203	NA	NA	NA	50	22	28	59	45	14	52	44	8	10	10	0	58	50	8
chr10	115287001	115288000	1000	*	1.67927e-06	0.00143773	44.4692	Downstream (1-2kb)	10	115269925	115270448	524	1	Gm8942	XR_872053.2	17076	NM_024454.1	Rab21	27591	9	8	1	56	40	16	16	4	12	71	18	53	67	38	29
chr10	115324001	115325000	1000	*	0.000201027	0.0414575	21.2992	Distal Intergenic	10	115298826	115315899	17074	2	Rab21	XM_006513537.3	-8102	NA	NA	NA	37	36	1	37	34	3	26	20	6	27	17	10	30	24	6
chr10	115479001	115480000	1000	*	9.95655e-05	0.0264872	-24.4668	Intron (NM_010195.2/Lgr5, intron 4 of 17)	10	115406410	115432772	26363	1	Zfc3h1	XM_017313907.1	72591	NM_010195.2	Lgr5	0	48	6	42	31	3	28	87	29	58	10	4	6	66	22	44
chr10	116331001	116332000	1000	*	1.87496e-10	8.6871e-07	33.8746	Exon (XM_006513378.3/Ptprb, exon 11 of 34)	10	116301374	116389538	88165	1	Ptprb	NM_029928.2	29627	XM_006513378.3;NM_029928.2	Ptprb;Ptprb	0;0	41	27	14	48	40	8	30	14	16	149	35	114	125	65	60
chr10	117023001	117024000	1000	*	2.07926e-15	2.50513e-11	-65.7498	Exon (NM_001007583.1/Best3, exon 10 of 10)	10	117041280	117044692	3413	1	Gm10747	XR_001779646.1	-17280	NM_001007583.1;XM_006513827.2;XM_006513830.2;XM_006513831.2;XM_006513829.1	Best3;Best3;Best3;Best3;Best3	0;0;0;0;0	45	3	42	55	11	44	65	38	27	33	26	7	5	5	0
chr10	117175001	117176000	1000	*	1.98077e-07	0.000267672	28.0414	Promoter (1-2kb)	10	117177625	117181110	3486	1	4930423D24Rik	XR_380819.2	-1625	XR_380819.2;XR_001779647.1	4930423D24Rik;Gm40769	-1625;4878	35	35	0	59	58	1	12	4	8	5	5	0	10	8	2
chr10	117229001	117230000	1000	*	1.41914e-07	0.000205971	-54.3895	Intron (XR_872062.1/Gm31963, intron 2 of 2)	10	117215141	117224507	9367	2	Yeats4	NM_026570.4	-4494	NM_029906.3;XR_380820.2;XR_872062.1;XR_872061.2;NM_026570.4	9530003J23Rik;Gm31963;Gm31963;Gm31963;Yeats4	8681;4515;0;0;-4494	16	0	16	34	18	16	34	28	6	24	21	3	11	8	3
chr10	117794001	117795000	1000	*	3.2078e-07	0.000394564	45.0436	Promoter (1-2kb)	10	117750621	117792737	42117	2	Nup107	XM_006513018.3	-1264	XM_006513018.3;NM_134010.2	Nup107;Nup107	-1264;-1296	27	26	1	20	18	2	17	10	7	15	4	11	34	20	14
chr10	117796001	117797000	1000	*	3.33767e-06	0.00244877	-46.0897	Distal Intergenic	10	117750621	117792737	42117	2	Nup107	XM_006513018.3	-3264	XM_006513018.3;NM_134010.2	Nup107;Nup107	-3264;-3296	20	3	17	45	15	30	10	5	5	5	4	1	26	21	5
chr10	117874001	117875000	1000	*	0.000103309	0.0271794	-22.4164	Promoter (1-2kb)	10	117876559	117906161	29603	1	Gm32605	XR_872076.2	-1559	XR_872076.2;XR_872074.2	Gm32605;Gm32605	-1559;-2129	7	6	1	20	11	9	26	24	2	45	44	1	17	15	2
chr10	118040001	118041000	1000	*	0.000228609	0.044685	32.4542	Intron (XR_872079.1/Gm32663, intron 2 of 3)	10	118013133	118053072	39940	1	Gm32663	XR_872079.1	26868	XR_872079.1	Gm32663	0	30	30	0	5	5	0	5	2	3	7	6	1	13	10	3
chr10	118586001	118587000	1000	*	0.000112423	0.0287747	-21.8174	Distal Intergenic	10	118502035	118556525	54491	2	Tmevpg1	NR_104123.1	-29476	NA	NA	NA	34	27	7	32	20	12	19	17	2	20	19	1	65	61	4
chr10	119061001	119062000	1000	*	5.79536e-05	0.0185214	-44.4118	Distal Intergenic	10	119029702	119053655	23954	2	Gm33677	XR_380847.1	-7346	NA	NA	NA	34	31	3	5	1	4	31	31	0	10	10	0	36	36	0
chr10	119074001	119075000	1000	*	3.70486e-05	0.0137932	21.9173	Promoter (1-2kb)	10	119067405	119076223	8819	2	Gm33861	XR_380851.2	1223	XR_380851.2;XR_001779652.1;XR_380850.2	Gm33861;Gm33861;Gm33861	0;0;0	28	28	0	7	7	0	41	26	15	16	14	2	24	20	4
chr10	119229001	119230000	1000	*	4.1356e-06	0.00285344	-26.3245	Intron (NM_027994.1/Cand1, intron 1 of 14)	10	119198812	119240055	41244	2	Cand1	NM_027994.1	10055	NM_027994.1	Cand1	0	68	35	33	48	34	14	31	29	2	26	25	1	22	16	6
chr10	119244001	119245000	1000	*	4.87561e-05	0.0165556	-28.8095	Distal Intergenic	10	119198812	119240055	41244	2	Cand1	NM_027994.1	-3946	NM_027994.1	Cand1	0	6	2	4	7	1	6	8	2	6	5	2	3	56	52	4
chr10	119413001	119414000	1000	*	8.20561e-05	0.0233978	-25.5546	Promoter (<=1kb)	10	119413444	119426864	13421	1	1700025F24Rik	NR_040578.1	0	NR_040578.1;XR_872101.1	1700025F24Rik;Gm40778	0;-1156	31	4	27	35	6	29	11	6	5	16	3	13	64	31	33
chr10	119691001	119692000	1000	*	8.32827e-05	0.0236263	31.5433	Promoter (<=1kb)	10	119690099	120087267	397169	1	Grip1	XM_006514239.2	902	XM_017314126.1;XM_006514238.2;XM_006514242.3;NM_001277292.1;NM_133442.2;NM_001277293.1;XM_006514235.2;XM_006514239.2	Grip1;Grip1;Grip1;Grip1;Grip1;Grip1;Grip1;Grip1	0;0;0;0;0;0;0;0	23	19	4	5	3	2	31	17	14	35	14	21	45	11	34
chr10	120113001	120114000	1000	*	2.23393e-20	4.46787e-16	-23.1273	Promoter (<=1kb)	10	120089787	120113015	23229	2	Helb	XM_017313781.1	0	NM_080446.2;XM_017313781.1	Helb;Helb	-36;0	248	49	199	302	60	242	245	117	128	211	74	137	337	155	182
chr10	120226001	120227000	1000	*	0.000177065	0.0382646	-34.1382	Promoter (<=1kb)	10	120227060	120232070	5011	1	Llph	NM_025431.2	-60	XR_001779655.1;NM_025431.2;XM_006513954.1;NM_026617.3	Gm40782;Llph;Llph;Tmbim4	3871;-60;-130;17175	26	16	10	60	15	45	18	13	5	15	9	6	6	6	0
chr10	120531001	120532000	1000	*	0.000112758	0.0288348	-41.1111	Promoter (2-3kb)	10	120528444	120538045	9602	1	Gm34952	XR_380876.2	2557	XR_380876.2	Gm34952	0	5	3	2	10	0	10	20	18	2	10	4	6	12	10	2
chr10	120687001	120688000	1000	*	0.000213733	0.0428838	-34.5939	Promoter (<=1kb)	10	120688412	120695179	6768	1	Gm35062	XR_872122.1	-412	XR_872122.1	Gm35062	-412	23	3	20	24	23	1	15	12	3	10	10	0	31	27	4
chr10	121031001	121032000	1000	*	1.20572e-07	0.000181584	53.2723	Promoter (2-3kb)	10	121034004	121100642	66639	1	Wif1	NM_011915.2	-2004	XR_872123.1;NM_011915.2	Gm40784;Wif1	8353;-2004	6	6	0	13	13	0	13	9	4	21	10	11	30	7	23
chr10	121254001	121255000	1000	*	3.50072e-09	1.07056e-05	-50.4029	Distal Intergenic	10	121242980	121243843	864	1	Gm35404	XR_380884.1	11021	NA	NA	NA	45	21	24	15	5	10	26	20	6	35	33	2	15	15	0
chr10	121309001	121310000	1000	*	4.92958e-05	0.0166765	40.7672	Promoter (1-2kb)	10	121264150	121311065	46916	2	Tbc1d30	XM_006514253.3	1065	NM_029057.1;XM_006514253.3	Tbc1d30;Tbc1d30	0;0	42	23	19	7	4	3	18	1	17	5	2	3	5	0	5
chr10	121516001	121517000	1000	*	0.000246266	0.0468364	31.9459	Intron (XR_872133.1/Gm35696, intron 2 of 2)	10	121510106	121522993	12888	1	Gm35696	XR_872129.2	5895	XR_872133.1;XR_380885.3;XR_872130.2;XR_872129.2	Gm35696;Gm35696;Gm35696;Gm35696	0;0;0;0	78	23	55	41	26	15	25	3	22	15	2	13	11	2	9
chr10	121757001	121758000	1000	*	0.000189586	0.0399044	-22.6674	Distal Intergenic	10	121739937	121752859	12923	1	BC048403	NM_173022.2	17064	XM_006513697.3;NM_173022.2	BC048403;BC048403	17395;17064	34	18	16	62	44	18	162	132	30	53	48	5	99	81	18
chr10	121831001	121832000	1000	*	8.36613e-07	0.000844211	-28.5104	Exon (XM_006513140.1/Srgap1, exon 11 of 22)	10	121807921	121811475	3555	1	LOC108167761	XR_001779660.1	23080	XM_006513140.1;NM_001081037.2;NM_001242411.1	Srgap1;Srgap1;Srgap1	0;0;0	28	17	11	40	26	14	45	42	3	39	33	6	52	50	2
chr10	122692001	122693000	1000	*	7.35013e-05	0.0218559	-23.0673	Intron (XM_006513740.3/Ppm1h, intron 1 of 5)	10	122679336	122679357	22	1	Mir8104	NA	12665	XM_006513740.3;NM_176919.4;NM_001110218.1	Ppm1h;Ppm1h;Ppm1h	0;0;0	20	8	12	46	25	21	38	34	4	5	2	3	16	13	3
chr10	123208001	123209000	1000	*	1.1283e-05	0.00591042	-20.0794	Promoter (2-3kb)	10	123207950	123211644	3695	2	Gm36628	XR_380910.2	2644	XR_380910.2;XR_001779701.1;XR_380909.2	Gm36628;Gm36628;Gm36628	0;2644;2644	45	6	39	21	1	20	28	7	21	10	1	9	63	33	30
chr10	123259001	123260000	1000	*	1.24669e-06	0.00114375	-41.2538	Distal Intergenic	10	123264002	123741204	477203	1	Fam19a2	XM_017313952.1	-4002	XM_017313952.1;XM_017313953.1;XM_017313955.1;NM_001252387.1;NM_182807.3;NR_045514.1	Fam19a2;Fam19a2;Fam19a2;Fam19a2;Fam19a2;Fam19a2	0;0;0;0;0;0	19	7	12	57	34	23	91	71	20	20	20	0	42	38	4
chr10	123680001	123681000	1000	*	3.99796e-11	2.13795e-07	-40.1427	Intron (XM_017313952.1/Fam19a2, intron 4 of 6)	10	123533857	123537534	3678	2	Gm40794	XR_872152.2	-142467	XM_017313952.1;XM_017313953.1;XM_017313955.1;NM_001252387.1;NM_182807.3;NR_045514.1;XM_017313954.1	Fam19a2;Fam19a2;Fam19a2;Fam19a2;Fam19a2;Fam19a2;Fam19a2	0;0;0;0;0;0;0	33	1	32	20	7	13	50	49	1	10	4	6	38	15	23
chr10	123876001	123877000	1000	*	5.05341e-05	0.0169237	-26.0628	Distal Intergenic	10	123533857	123537534	3678	2	Gm40794	XR_872152.2	-338467	NA	NA	NA	44	27	17	49	40	9	15	15	0	10	10	0	41	38	3
chr10	124842001	124843000	1000	*	7.51837e-05	0.0221635	20.832	Distal Intergenic	10	124997431	125005441	8011	1	Gm36719	XR_380911.1	-154431	NA	NA	NA	23	22	1	21	20	1	64	50	14	5	5	0	35	16	19
chr10	126330001	126331000	1000	*	3.02136e-05	0.011961	40.4168	Distal Intergenic	10	126371838	126374329	2492	1	1700025K04Rik	XR_001779705.1	-40838	NA	NA	NA	17	7	10	11	7	4	5	1	4	15	1	14	43	4	39
chr10	126520001	126521000	1000	*	2.58943e-06	0.00200887	-23.0813	Distal Intergenic	10	126663935	126677366	13432	1	Gm40797	XR_001779706.1	-142935	NA	NA	NA	22	21	1	37	21	16	10	10	0	16	16	0	41	40	1
chr10	126534001	126535000	1000	*	3.2942e-08	6.70916e-05	-46.9756	Distal Intergenic	10	126663935	126677366	13432	1	Gm40797	XR_001779706.1	-128935	NA	NA	NA	17	8	9	22	12	10	15	14	1	16	16	0	18	18	0
chr10	126819001	126820000	1000	*	4.90337e-06	0.00321322	31.8269	Distal Intergenic	10	126788851	126793710	4860	2	4930484H19Rik	NR_131015.1	-25291	NA	NA	NA	10	7	3	42	42	0	13	4	9	5	3	2	16	11	5
chr10	127115001	127116000	1000	*	4.26119e-08	8.24215e-05	-26.9217	Promoter (1-2kb)	10	127107362	127113573	6212	2	Gm40799	XR_872170.1	-1428	XR_872170.1;NM_001171026.1;NM_177614.3;XM_011243420.1	Gm40799;Os9;Os9;Os9	-1428;0;0;0	26	7	19	20	18	2	102	99	3	22	13	9	23	23	0
chr10	128546001	128547000	1000	*	1.97633e-07	0.000267672	44.2653	Promoter (<=1kb)	10	128543563	128547685	4123	2	Zc3h10	XM_006513013.2	685	Gm9176;NM_018860.4;XM_006513013.2;NM_134003.1	Gm9176;Rpl41;Zc3h10;Zc3h10	0;0;0;0	27	22	5	46	30	16	36	14	22	25	3	22	22	8	14
chr10	128549001	128550000	1000	*	2.15438e-15	2.56474e-11	-55.0942	Promoter (<=1kb)	10	128548110	128549168	1059	2	Rpl41	NM_018860.4	0	Gm9176;NM_018860.4;XM_006513013.2;NM_134003.1	Gm9176;Rpl41;Zc3h10;Zc3h10	0;0;0;0	11	5	6	96	9	87	31	23	8	5	5	0	15	11	4
chr10	129358001	129359000	1000	*	6.2653e-07	0.000669369	71.9444	Distal Intergenic	10	129350565	129351509	945	1	Olfr782	NM_001011797.1	7436	NA	NA	NA	20	19	1	5	5	0	5	3	2	5	0	5	6	1	5
chr10	130536001	130537000	1000	*	4.39239e-06	0.00297991	23.7385	Promoter (<=1kb)	10	130535229	130536024	796	2	Gm35405	Gm35405	0	Gm35405	Gm35405	0	72	54	18	66	45	21	77	43	34	28	13	15	109	45	64
chr11	5104001	5105000	1000	*	0.000122655	0.0302703	33.3333	Promoter (2-3kb)	11	5099967	5101417	1451	2	LOC108167880	XR_001780157.1	-2584	XM_006514525.3;XM_006514524.2;XM_006514518.3;XM_006514522.3;XR_380959.1;XM_006514521.3;XM_006514514.3;XM_006514516.3;XM_006514515.3;NM_080595.2;XM_006514517.2;NM_001283061.1;NM_001283062.1;NM_007968.3;XM_006514508.2;XM_006514509.2;XM_006514510.2;XM_006514511.2;XM_017314255.1;XR_001779874.1;XM_006514512.3;NM_001283063.1;XM_017314880.1;XR_001780157.1;XM_006514715.2;NM_001290491.1;NM_001290492.1;NM_…	Emid1;Emid1;Emid1;Emid1;Emid1;Emid1;Emid1;Emid1;Emid1;Emid1;Emid1;Ewsr1;Ewsr1;Ewsr1;Ewsr1;Ewsr1;Ewsr1;Ewsr1;Ewsr1;Ewsr1;Ewsr1;Ewsr1;LOC108167339;LOC108167880;Rhbdd3;Rhbdd3;Rhbdd3;Rhbdd3;Rhbdd3;Rhbdd3;Rhbdd3;Rhbdd3	29410;31084;46110;46352;47240;47272;47296;47296;47297;47222;47297;-4913;-4913;-4913;-4902;-4902;-4902;-4902;-4902;-4902;-4902;-4913;6838;-2584;0;0;0;0;0;0;0;0	10	10	0	17	17	0	5	3	2	10	8	2	15	9	6
chr11	5518001	5519000	1000	*	4.20594e-08	8.17232e-05	-24.7334	Promoter (1-2kb)	11	5520641	5525993	5353	1	Xbp1	NM_001271730.1	-1641	NM_001271730.1;NM_013842.3	Xbp1;Xbp1	-1641;-1641	29	28	1	40	21	19	45	44	1	12	12	0	33	33	0
chr11	6273001	6274000	1000	*	3.19277e-08	6.54257e-05	-35.7143	Promoter (<=1kb)	11	6270714	6274837	4124	2	Tmed4	NM_134020.1	837	XM_017314650.1;NM_134020.1	Ddx56;Tmed4	-4610;0	27	24	3	63	18	45	5	5	0	16	16	0	36	30	6
chr11	6292001	6293000	1000	*	0.000210642	0.0425195	-25.4827	Promoter (<=1kb)	11	6291531	6292269	739	2	LOC108167883	XM_017314881.1	0	XM_017314881.1;NM_001252282.1;NM_001252283.1;NM_001252287.1;NM_010956.4;XM_006514586.3;XM_006514583.3;XM_006514585.2;XM_006514582.2;XM_006514584.3;NM_001252288.1;XM_017314337.1	LOC108167883;Ogdh;Ogdh;Ogdh;Ogdh;Ogdh;Ogdh;Ogdh;Ogdh;Ogdh;Ogdh;Ogdh	0;0;0;0;0;0;0;0;0;0;0;0	40	1	39	98	3	95	10	1	9	17	3	14	7	4	3
chr11	6373001	6374000	1000	*	0.000102541	0.0270271	21.2748	Distal Intergenic	11	6389063	6406154	17092	1	Zmiz2	XM_006514750.3	-15063	NA	NA	NA	35	33	2	32	31	1	30	10	20	24	23	1	32	30	2
chr11	6474001	6475000	1000	*	4.29819e-05	0.015258	27.5688	Promoter (1-2kb)	11	6467599	6476076	8478	2	Purb	NM_011221.3	1076	NM_011221.3	Purb	0	17	6	11	16	7	9	65	1	64	48	14	34	97	5	92
chr11	9964001	9965000	1000	*	8.95782e-05	0.0248306	23.0159	Distal Intergenic	11	10239348	10240450	1103	1	Gm11996	Gm11996	-274348	NA	NA	NA	6	6	0	26	26	0	6	4	2	8	8	0	28	18	10
chr11	10409001	10410000	1000	*	4.10654e-05	0.0148082	-32.7912	Distal Intergenic	11	10376770	10385266	8497	2	LOC108167854	LOC108167854	-23735	NA	NA	NA	12	5	7	30	6	24	31	19	12	16	9	7	30	22	8
chr11	10586001	10587000	1000	*	1.28236e-07	0.000189979	-34.6553	Distal Intergenic	11	10438451	10441867	3417	2	LOC108167855	XM_017314871.1	-144134	NA	NA	NA	38	13	25	60	30	30	44	33	11	12	9	3	71	57	14
chr11	11787001	11788000	1000	*	2.68829e-05	0.0109996	42.7382	Distal Intergenic	11	11800373	11808906	8534	2	Fignl1	XM_011243738.2	20906	NA	NA	NA	25	23	2	55	33	22	81	28	53	5	0	5	23	15	8
chr11	16750001	16751000	1000	*	0.000163137	0.0363983	38.0638	Promoter (1-2kb)	11	16752203	16887658	135456	1	Egfr	NM_007912.4	-1203	NM_007912.4;NM_207655.2	Egfr;Egfr	-1203;-1203	19	18	1	18	17	1	11	3	8	26	18	8	26	19	7
chr11	19032001	19033000	1000	*	6.24923e-05	0.019582	-26.265	Distal Intergenic	11	18881360	19020672	139313	2	Meis1	XR_001779900.1	-11329	NA	NA	NA	15	10	5	55	24	31	23	19	4	41	29	12	22	20	2
chr11	19053001	19054000	1000	*	4.49146e-06	0.00303177	23.4195	Distal Intergenic	11	19065275	19075740	10466	1	4933406G16Rik	NR_046037.1	-11275	NA	NA	NA	25	19	6	29	25	4	50	25	25	11	10	1	56	18	38
chr11	19760001	19761000	1000	*	4.01955e-08	7.85789e-05	-48.4496	Distal Intergenic	11	19725864	19742707	16844	2	Gm39602	XR_872269.1	-17294	NA	NA	NA	12	6	6	20	10	10	43	41	2	15	15	0	5	5	0
chr11	22225001	22226000	1000	*	0.000169639	0.0372916	-46.1111	Intron (NM_001252515.1/Ehbp1, intron 5 of 24)	11	22005825	22286795	280971	2	Ehbp1	NM_001252515.1	60795	NM_001252515.1;NM_153078.4;XM_011243681.2;XM_011243693.2;XM_017314440.1;XM_011243685.2;XM_011243686.2;XM_011243687.2;XM_011243688.2;XM_011243689.2;XM_011243690.2;XM_011243691.2;XM_011243692.2;XM_017314438.1;XM_017314439.1;XM_011243684.2;XM_017314437.1;XM_011243683.2;XM_011243682.2	Ehbp1;Ehbp1;Ehbp1;Ehbp1;Ehbp1;Ehbp1;Ehbp1;Ehbp1;Ehbp1;Ehbp1;Ehbp1;Ehbp1;Ehbp1;Ehbp1;Ehbp1;Ehbp1;Ehbp1;Ehbp1;Ehbp1	0;0;0;0;0;0;0;0;0;0;0;0;0;0;0;0;0;0;0	6	3	3	15	7	8	15	14	1	5	5	0	10	9	1
chr11	23068001	23069000	1000	*	2.90142e-05	0.0116243	-22.0287	Exon (XR_872307.1/Gm12059, exon 1 of 2)	11	23064694	23076310	11617	1	Gm12059	XR_381097.3	3307	XR_872307.1;XR_381097.3	Gm12059;Gm12059	0;0	32	9	23	55	1	54	34	15	19	14	3	11	22	10	12
chr11	24073001	24074000	1000	*	5.91041e-07	0.000640348	37.8129	Promoter (2-3kb)	11	24033275	24076359	43085	2	Gm33232	XR_381103.3	2359	XM_006514504.3;XM_006514506.2;XM_006514505.2;XM_011243660.1;XM_011243659.2;NM_001242934.1;NM_001159289.1;NM_016707.3;XR_381103.3	Bcl11a;Bcl11a;Bcl11a;Bcl11a;Bcl11a;Bcl11a;Bcl11a;Bcl11a;Gm33232	-2544;-3438;-3704;-3880;0;-4056;0;0;0	25	6	19	22	14	8	53	1	52	31	5	26	6	0	6
chr11	24173001	24174000	1000	*	1.25253e-06	0.00114806	-26.1559	Promoter (<=1kb)	11	24160526	24172824	12299	2	4930538E20Rik	XR_872319.2	-177	XR_872319.2;XM_006514504.3;XM_006514506.2;XM_006514505.2;XM_011243660.1;XM_011243659.2;NM_001242934.1;NM_001159289.1;NM_016707.3;XM_006514507.2;NM_001159290.1	4930538E20Rik;Bcl11a;Bcl11a;Bcl11a;Bcl11a;Bcl11a;Bcl11a;Bcl11a;Bcl11a;Bcl11a;Bcl11a	-177;96457;95563;95297;95121;0;94945;0;0;92367;0	79	51	28	55	31	24	42	28	14	44	44	0	44	41	3
chr11	24865001	24866000	1000	*	4.43599e-06	0.00300135	-27.8145	Distal Intergenic	11	24913726	24926380	12655	2	LOC102636777	XR_381111.2	60380	NA	NA	NA	33	24	9	50	33	17	13	13	0	21	20	1	27	26	1
chr11	26709001	26710000	1000	*	3.13743e-07	0.000388295	-24.4384	Distal Intergenic	11	26785108	26787860	2753	1	Gm12070	NR_002890.1	-75108	NA	NA	NA	35	18	17	43	40	3	43	40	3	48	48	0	66	64	2
chr11	26819001	26820000	1000	*	2.43388e-10	1.06283e-06	-20.9817	Distal Intergenic	11	26785108	26787860	2753	1	Gm12070	NR_002890.1	33893	NA	NA	NA	55	34	21	19	18	1	50	50	0	27	27	0	45	44	1
chr11	29624001	29625000	1000	*	4.78344e-05	0.0164142	26.3095	Intron (XR_872327.2/Gm12092, intron 2 of 4)	11	29612320	29646075	33756	2	Gm12092	XR_381125.3	21075	XR_872327.2;XR_381125.3;XR_381126.3;XR_381122.3;XR_381124.3	Gm12092;Gm12092;Gm12092;Gm12092;Gm12092	0;0;0;0;0	26	26	0	23	23	0	35	31	4	12	6	6	40	33	7
chr11	30026001	30027000	1000	*	4.18212e-06	0.00287431	-27.619	Promoter (<=1kb)	11	29743044	30026035	282992	2	Eml6	XM_006514694.3	0	XM_006514694.3;XR_001779999.1;NM_146016.2;XM_017314514.1;XM_017314515.1;XM_017314516.1;XM_017314517.1;XM_017314513.1	Eml6;Eml6;Eml6;Eml6;Eml6;Eml6;Eml6;Eml6	0;0;0;0;0;0;0;0	44	0	44	5	0	5	10	0	10	5	2	3	21	9	12
chr11	30095001	30096000	1000	*	1.27599e-05	0.00645419	31.0823	Distal Intergenic	11	29743044	30026042	282999	2	Eml6	XR_001779999.1	-68959	XR_001779935.1;NM_175836.2;XM_006514600.3;XM_006514599.3;XM_006514601.2	Sptbn1;Sptbn1;Sptbn1;Sptbn1;Sptbn1	102257;123772;171844;172205;102648	11	11	0	15	15	0	29	23	6	26	24	2	37	13	24
chr11	31941001	31942000	1000	*	1.48985e-06	0.00131033	-23.6973	Distal Intergenic	11	31965554	31979655	14102	1	4930524B15Rik	XM_006514795.1	-23554	NA	NA	NA	16	0	16	31	2	29	39	15	24	20	0	20	104	44	60
chr11	32106001	32107000	1000	*	0.000224578	0.0442585	27.6515	Distal Intergenic	11	32095259	32101228	5970	2	Gm12108	NR_130637.1	-4773	NR_130637.1	Gm12108	-4773	5	5	0	44	41	3	33	27	6	6	5	1	24	10	14
chr11	35932001	35933000	1000	*	6.01429e-10	2.34933e-06	-49.9601	Intron (NM_170779.1/Wwc1, intron 1 of 22)	11	35839178	35980089	140912	2	Wwc1	NM_170779.1	47089	NM_170779.1	Wwc1	0	22	6	16	6	4	2	16	16	0	76	69	7	5	5	0
chr11	35980001	35981000	1000	*	9.44315e-29	3.37255e-24	20.1646	Promoter (<=1kb)	11	35839178	35980089	140912	2	Wwc1	NM_170779.1	0	NM_170779.1	Wwc1	0	62	1	61	351	158	193	75	1	74	28	2	26	103	1	102
chr11	37723001	37724000	1000	*	0.000142164	0.0334189	33.7302	Distal Intergenic	11	37658989	37673166	14178	1	Gm12128	NR_131154.1	64012	NA	NA	NA	5	5	0	25	25	0	7	4	3	12	11	1	10	5	5
chr11	38477001	38478000	1000	*	1.25331e-05	0.00638466	48.7255	Distal Intergenic	11	38491548	38520045	28498	2	Gm12130	NR_040295.1	42045	NA	NA	NA	15	12	3	22	18	4	26	9	17	5	1	4	31	13	18
chr11	39589001	39590000	1000	*	7.16946e-08	0.000121723	34.0125	Promoter (<=1kb)	11	39588168	39696513	108346	1	Gm33963	XR_388578.2	833	XR_388578.2	Gm33963	0	74	31	43	43	25	18	33	7	26	51	8	43	36	4	32
chr11	41498001	41499000	1000	*	3.46497e-06	0.00251632	25.997	Promoter (<=1kb)	11	41498677	41500911	2235	1	Hspd1-ps3	Hspd1-ps3	0	Hspd1-ps3	Hspd1-ps3	0	46	21	25	93	50	43	42	12	30	19	3	16	127	34	93
chr11	41731001	41732000	1000	*	5.40314e-05	0.0177735	23.8701	Intron (XR_388589.3/LOC102637814, intron 2 of 8)	11	41710344	41968788	258445	1	LOC102637814	XR_388589.3	20657	XR_388589.3	LOC102637814	0	48	44	4	45	38	7	45	35	10	31	19	12	43	23	20
chr11	41999001	42000000	1000	*	6.15586e-06	0.00381404	45.6863	Promoter (<=1kb)	11	41910190	42000714	90525	2	Gabrg2	NM_008073.3	714	NM_008073.3;NM_177408.6;XM_006532200.2;XM_006532199.1	Gabrg2;Gabrg2;Gabrg2;Gabrg2	0;0;0;0	17	11	6	15	6	9	5	0	5	5	1	4	18	0	18
chr11	42418001	42419000	1000	*	1.45393e-06	0.00128666	-41.7284	Promoter (<=1kb)	11	42419757	42632591	212835	1	Gabrb2	NM_008070.3	-757	NM_008070.3;XM_017314261.1;XM_011248726.1;XR_879803.1;XR_388590.3	Gabrb2;Gabrb2;Gabrb2;Gm34591;Gm34591	-757;-1071;-2276;-1304;0	69	16	53	120	31	89	26	17	9	5	4	1	15	8	7
chr11	43404001	43405000	1000	*	0.000114977	0.0290787	-38.9699	Distal Intergenic	11	43414614	43418967	4354	2	Gm5782	XR_879807.2	13967	NA	NA	NA	29	10	19	24	10	14	29	16	13	8	7	1	26	23	3
chr11	43475001	43476000	1000	*	8.55933e-08	0.00013963	39.4176	Promoter (<=1kb)	11	43474306	43491525	17220	1	C1qtnf2	NM_026979.5	695	NM_026979.5;LOC102638276	C1qtnf2;LOC102638276	0;-777	10	10	0	73	64	9	36	13	23	21	12	9	30	21	9
chr11	44233001	44234000	1000	*	5.97664e-07	0.000644769	-35.7486	Distal Intergenic	11	44400063	44414677	14615	1	Il12b	NM_001303244.1	-166063	NA	NA	NA	62	33	29	57	30	27	35	27	8	12	12	0	36	32	4
chr11	44490001	44491000	1000	*	4.02154e-05	0.0145972	30.0991	Distal Intergenic	11	44454571	44472168	17598	2	Ublcp1	XM_006534522.3	-17833	NA	NA	NA	61	41	20	63	50	13	60	22	38	10	3	7	62	39	23
chr11	45525001	45526000	1000	*	0.000226332	0.0444708	24.9322	Distal Intergenic	11	45703805	45706284	2480	1	Gm35282	XR_388600.1	-177805	NA	NA	NA	10	10	0	11	11	0	15	13	2	10	8	2	41	24	17
chr11	45550001	45551000	1000	*	0.000182666	0.0390479	-22.146	Distal Intergenic	11	45703805	45706284	2480	1	Gm35282	XR_388600.1	-152805	NA	NA	NA	69	31	38	101	33	68	79	44	35	10	7	3	105	60	45
chr11	45943001	45944000	1000	*	0.000193543	0.0404817	-31.5686	Promoter (<=1kb)	11	45928269	45944935	16667	2	Lsm11	NM_028185.2	935	XM_011249271.2;NM_028185.2;NM_001290737.1;NM_001080969.3;XM_011249180.2;XM_011249179.1	Lsm11;Lsm11;Thg1l;Thg1l;Thg1l;Thg1l	0;0;11188;11503;11070;11364	21	5	16	34	8	26	21	18	3	15	8	7	15	4	11
chr11	45991001	45992000	1000	*	2.3163e-06	0.00184272	-43.9474	Exon (NM_173384.2/Sox30, exon 4 of 5)	11	45980310	46017992	37683	1	Sox30	NM_173384.2	10691	XM_006532797.3;NM_173384.2	Sox30;Sox30	0;0	38	5	33	25	8	17	16	12	4	11	8	3	27	14	13
chr11	46058001	46059000	1000	*	2.79509e-05	0.0113253	-55.0385	Promoter (2-3kb)	11	46055984	46147347	91364	1	Adam19	NM_009616.4	2017	NM_001291890.1;NM_001291891.1;NM_009616.4	Adam19;Adam19;Adam19	0;0;0	6	1	5	12	2	10	63	52	11	44	18	26	12	11	1
chr11	46201001	46202000	1000	*	6.14608e-05	0.0193368	32.6667	Intron (NM_001252460.1/Cyfip2, intron 28 of 30)	11	46179067	46193869	14803	1	Gm35624	XR_879816.2	21934	NM_001252460.1;NM_133769.3;NM_001252459.1;XM_006534461.3;XM_006534462.3;XM_006534463.2	Cyfip2;Cyfip2;Cyfip2;Cyfip2;Cyfip2;Cyfip2	0;0;0;0;0;0	10	10	0	25	23	2	40	20	20	40	32	8	55	33	22
chr11	46868001	46869000	1000	*	0.000259863	0.0483018	-20.2968	Distal Intergenic	11	46810799	46844333	33535	1	Timd4	NM_178759.4	57202	NA	NA	NA	59	37	22	55	28	27	44	29	15	33	25	8	58	52	6
chr11	52616001	52617000	1000	*	1.26749e-05	0.0064226	-24.214	Intron (XR_388636.2/Gm30366, intron 1 of 5)	11	52648394	52663853	15460	1	Gm30366	XR_879840.1	-31394	XR_388636.2;XR_879838.1	Gm30366;Gm30366	0;0	59	33	26	29	22	7	36	33	3	25	23	2	15	13	2
chr11	53904001	53905000	1000	*	3.76401e-07	0.000446501	-35.7062	Distal Intergenic	11	53864542	53891801	27260	2	Slc22a5	XR_001779934.1	-12200	NA	NA	NA	116	73	43	6	3	3	21	21	0	36	33	3	66	56	10
chr11	55121001	55122000	1000	*	4.03816e-05	0.0146204	-26.4832	Promoter (2-3kb)	11	55117994	55118892	899	2	Gm12231	Gm12231	-2109	Gm12231;XM_011248900.1;XM_011248899.1;XM_017314432.1;XM_006532829.3;XM_011248898.2;NM_172258.3	Gm12231;Slc36a3;Slc36a3;Slc36a3;Slc36a3;Slc36a3;Slc36a3	-2109;15760;29238;29725;29726;29726;29706	25	16	9	36	24	12	27	25	2	35	35	0	35	29	6
chr11	55392001	55393000	1000	*	7.87832e-05	0.0228163	-22.3074	Downstream (1-2kb)	11	55380727	55384302	3576	2	Gm31842	XR_879860.1	-7699	NM_001290817.1;NM_009242.5	Sparc;Sparc	27080;27080	115	48	67	85	40	45	31	25	6	59	33	26	96	61	35
chr11	58846001	58847000	1000	*	0.000257692	0.0480795	50	Promoter (<=1kb)	11	58847119	58861957	14839	1	LOC108167848	XM_017314865.1	-119	XM_017314865.1;NM_146537.2	LOC108167848;Olfr311	-119;4885	7	7	0	6	6	0	12	6	6	6	0	6	6	6	0
chr11	59584001	59585000	1000	*	9.4726e-06	0.0052227	-36.6261	Distal Intergenic	11	59589128	59590087	960	2	Olfr223	NM_146429.1	5087	NM_146429.1	Olfr223	5087	20	6	14	43	10	33	21	8	13	10	6	4	24	22	2
chr11	59656001	59657000	1000	*	0.000127242	0.031103	-34.7222	Distal Intergenic	11	59662473	59744695	82223	1	Mprip	XM_006533442.2	-5473	NA	NA	NA	33	22	11	12	7	5	10	10	0	12	12	0	12	11	1
chr11	60306001	60307000	1000	*	3.36818e-05	0.0129198	-20.8829	Intron (XM_011248908.2/Tom1l2, intron 1 of 12)	11	60343227	60344387	1161	1	Gm12266	Gm12266	-36227	XM_011248908.2;NM_001039092.3;NM_153080.2;XM_011248907.2;XM_006532861.3;XM_011248906.2;XM_017314451.1;XM_006532867.3;NM_001039093.1	Tom1l2;Tom1l2;Tom1l2;Tom1l2;Tom1l2;Tom1l2;Tom1l2;Tom1l2;Tom1l2	0;0;0;0;0;0;0;0;0	23	18	5	29	22	7	68	66	2	18	18	0	31	30	1
chr11	61746001	61747000	1000	*	3.14229e-05	0.0123034	29.1026	Intron (XM_017314419.1/Prpsap2, intron 4 of 9)	11	61729650	61756284	26635	2	Prpsap2	XM_017314419.1	9284	XM_017314419.1;XM_017314418.1;NM_001164242.1;NM_001164243.1;NM_001164244.1;NM_144806.2;XM_017314420.1;XM_006532761.3	Prpsap2;Prpsap2;Prpsap2;Prpsap2;Prpsap2;Prpsap2;Prpsap2;Prpsap2	0;0;0;0;0;0;0;0	78	74	4	35	28	7	20	15	5	12	6	6	14	7	7
chr11	62665001	62666000	1000	*	9.36401e-09	2.4072e-05	48.0044	3' UTR	11	62648664	62666359	17696	1	Mmgt2	NM_175002.2	16337	XM_006532870.2;XM_011248909.1;XM_011248910.1;XM_011248911.1;XM_011248912.1;XM_011248913.1;XM_011248914.1;NM_175002.2	Mmgt2;Mmgt2;Mmgt2;Mmgt2;Mmgt2;Mmgt2;Mmgt2;Mmgt2	0;0;0;0;0;0;0;0	21	16	5	25	24	1	83	31	52	10	0	10	13	10	3
chr11	62744001	62745000	1000	*	1.94606e-06	0.00162036	27.427	Promoter (1-2kb)	11	62746015	62746086	72	2	n-TWcca8	rna67652	1086	Wsb2-ps;rna67652	Wsb2-ps;n-TWcca8	6346;1086	61	33	28	106	58	48	34	14	20	31	5	26	55	13	42
chr11	62999001	63000000	1000	*	0.000181195	0.0388497	-31.7647	Exon (XR_001780234.1/LOC108167905, exon 2 of 2)	11	62990453	63004134	13682	2	Cdrt4os1	NR_126547.1	4134	NR_126547.1;XR_001780234.1	Cdrt4os1;LOC108167905	0;0	17	13	4	10	6	4	16	16	0	10	10	0	6	6	0
chr11	64147001	64148000	1000	*	8.98654e-07	0.000894575	-25.9333	Distal Intergenic	11	64164409	64182244	17836	1	Gm12290	XR_388742.2	-16409	NA	NA	NA	130	23	107	102	32	70	113	37	76	5	3	2	104	61	43
chr11	64521001	64522000	1000	*	1.96503e-07	0.000266988	-36.9495	3' UTR	11	64433135	64436674	3540	2	F930015N05Rik	NR_028445.1	-84327	NM_178870.5	Hs3st3a1	0	33	15	18	26	6	20	54	45	9	5	3	2	64	45	19
chr11	67313001	67314000	1000	*	8.62814e-05	0.0241888	21.0394	Distal Intergenic	11	67327103	67371502	44400	1	Myh13	NM_001081250.1	-13103	NM_177369.3	Myh8	35877	23	23	0	25	25	0	31	29	2	15	14	1	20	10	10
chr11	67461001	67462000	1000	*	2.69572e-05	0.0110202	28.3088	Intron (XM_006532202.1/Gas7, intron 1 of 13)	11	67455724	67688992	233269	1	Gas7	XM_006532210.2	5277	XM_006532202.1;XM_006532210.2	Gas7;Gas7	0;0	24	23	1	27	24	3	17	10	7	5	5	0	15	5	10
chr11	67770001	67771000	1000	*	5.34541e-07	0.000589351	-23.6555	Promoter (<=1kb)	11	67663784	67770912	107129	2	Glp2r	XM_006534562.3	0	XM_006534562.3;XM_006534561.3;NM_175681.3;XM_618894.5	Glp2r;Glp2r;Glp2r;Gsg1l2	0;0;0;-3406	77	59	18	101	38	63	74	59	15	42	38	4	122	88	34
chr11	68481001	68482000	1000	*	1.02202e-06	0.000981769	38.6376	Intron (NM_177320.2/Pik3r5, intron 5 of 18)	11	68503019	68539043	36025	1	Pik3r6	XM_006531950.1	-21019	NM_177320.2;XM_006533548.2	Pik3r5;Pik3r5	0;0	17	13	4	89	76	13	14	3	11	10	6	4	11	5	6
chr11	68911001	68912000	1000	*	7.08665e-05	0.0213453	-23.9388	Distal Intergenic	11	68901566	68904534	2969	1	Rpl26	NM_009080.2	9435	NA	NA	NA	95	33	62	52	14	38	64	31	33	43	22	21	51	33	18
chr11	69429001	69430000	1000	*	6.47316e-06	0.00394705	-24.4994	3' UTR	11	69398508	69418147	19640	2	Kdm6b	XM_011248919.2	-10854	XM_017314611.1;XM_006533560.3;XM_006533559.2;XM_011249075.1;XM_006533554.3;XM_011249076.2;XM_017314610.1;XM_006533552.3;XM_011249077.2;XM_011249074.2;XR_001780019.1;NM_001081330.1;XM_011249079.2;XM_011249081.2	Dnah2;Dnah2;Dnah2;Dnah2;Dnah2;Dnah2;Dnah2;Dnah2;Dnah2;Dnah2;Dnah2;Dnah2;Dnah2;Dnah2	0;0;0;0;0;0;0;0;0;0;0;0;0;116840	37	24	13	55	33	22	44	39	5	55	50	5	32	26	6
chr11	69614001	69615000	1000	*	1.78893e-05	0.00825915	25.2828	Promoter (2-3kb)	11	69614816	69617905	3090	2	Shbg	NM_011367.2	2905	XM_011248838.2;XM_011248837.2;NM_011367.2	Shbg;Shbg;Shbg	0;0;0	30	6	24	48	24	24	12	0	12	62	2	60	54	14	40
chr11	69621001	69622000	1000	*	0.000256231	0.047886	28.5913	Promoter (<=1kb)	11	69621996	69624032	2037	1	Sat2	XM_006534111.3	0	XM_006534111.3;XM_006534112.3;XM_006534110.2;NM_026991.2;XM_011248838.2;XM_011248837.2;NM_011367.2	Sat2;Sat2;Sat2;Sat2;Shbg;Shbg;Shbg	0;0;0;-109;0;0;0	7	2	5	16	14	2	20	11	9	27	0	27	24	8	16
chr11	69628001	69629000	1000	*	3.52936e-06	0.00255566	-22.0388	Promoter (2-3kb)	11	69630154	69631881	1728	2	LOC108167907	LOC108167907	2881	NM_011814.2;LOC108167907;XM_006534111.3;XM_006534112.3;XM_006534110.2;NM_026991.2	Fxr2;LOC108167907;Sat2;Sat2;Sat2;Sat2	-3971;2881;0;0;0;5892	38	26	12	33	18	15	11	11	0	5	3	2	106	96	10
chr11	71642001	71643000	1000	*	5.00771e-05	0.0168157	20.1389	Distal Intergenic	11	71650164	71664679	14516	1	Gm33964	XR_388815.2	-7164	NA	NA	NA	30	30	0	11	11	0	16	9	7	5	5	0	6	5	1
chr11	72343001	72344000	1000	*	1.77839e-05	0.00823629	50.6061	Downstream (<1kb)	11	72344717	72361296	16580	2	Tekt1	NM_001282007.1	17296	NM_001282007.1;NM_011569.3;NM_001282006.1;XM_006532933.2	Tekt1;Tekt1;Tekt1;Tekt1	17296;17882;18442;17892	24	24	0	15	14	1	5	1	4	22	18	4	11	4	7
chr11	72689001	72690000	1000	*	0.000104289	0.0273581	22.0776	Promoter (<=1kb)	11	72690002	72772146	82145	1	Ankfy1	NM_009671.5	-2	NM_009671.5;NM_025985.4	Ankfy1;Ube2g1	-2;81740	27	12	15	25	10	15	25	8	17	5	1	4	83	7	76
chr11	74527001	74528000	1000	*	2.20461e-06	0.0017727	38.7903	Intron (XR_388484.2/Rap1gap2, intron 2 of 24)	11	74383544	74522796	139253	2	Rap1gap2	XM_006533626.2	-4205	XR_388484.2;NM_001015046.2;XR_388485.2;XM_006533626.2;XM_006533627.3;XM_006533621.3;XM_006533622.3	Rap1gap2;Rap1gap2;Rap1gap2;Rap1gap2;Rap1gap2;Rap1gap2;Rap1gap2	0;0;0;-4205;0;0;0	11	10	1	20	19	1	5	3	2	22	19	3	31	5	26
chr11	74847001	74848000	1000	*	1.91971e-05	0.0086932	21.5761	Downstream (1-2kb)	11	74838400	74845725	7326	1	Mnt	XM_006532403.2	8601	XM_006532402.3;NM_010813.3;XM_006532403.2;XM_006534581.3;XR_001780082.1;XR_001780083.1;XR_001780084.1;XR_001780085.1;XR_388560.3;NM_197943.2;XM_006534589.3;XM_017314864.1;XM_006534587.2;XM_017314863.1;XM_006534583.3;XM_006534584.3;XM_006534585.3	Mnt;Mnt;Mnt;Sgsm2;Sgsm2;Sgsm2;Sgsm2;Sgsm2;Sgsm2;Sgsm2;Sgsm2;Sgsm2;Sgsm2;Sgsm2;Sgsm2;Sgsm2;Sgsm2	16220;16077;8601;49536;49536;49536;49536;49536;49536;49080;19699;20026;21092;21177;49536;49536;49536	67	62	5	26	24	2	88	54	34	41	28	13	111	92	19
chr11	77066001	77067000	1000	*	0.000272716	0.0497174	-32.563	Intron (NM_001012309.2/Nsrp1, intron 2 of 6)	11	77078086	77078108	23	2	Mir423	NA	11108	NM_001012309.2	Nsrp1	0	12	8	4	14	9	5	5	5	0	18	18	0	17	16	1
chr11	79748001	79749000	1000	*	8.85324e-06	0.00497373	-43.8016	Intron (XR_001780101.1/LOC105242790, intron 2 of 2)	11	79728385	79731743	3359	1	LOC108167851	XR_001780098.1	19616	XR_001780101.1	LOC105242790	0	27	2	25	43	17	26	11	9	2	10	10	0	5	1	4
chr11	79835001	79836000	1000	*	0.000134984	0.0322928	-38.5714	Distal Intergenic	11	79810232	79823670	13439	2	LOC108167852	XR_001780102.1	-11331	NA	NA	NA	20	10	10	10	6	4	20	19	1	5	5	0	21	18	3
chr11	80696001	80697000	1000	*	8.97741e-05	0.0248751	-40.5667	Intron (NM_177390.3/Myo1d, intron 1 of 21)	11	80722910	80728012	5103	1	Gm31042	XR_388890.2	-25910	NM_177390.3;XM_006533585.1;XM_006533586.3;XM_011249086.2	Myo1d;Myo1d;Myo1d;Myo1d	0;0;0;0	12	4	8	13	6	7	41	34	7	26	20	6	37	30	7
chr11	81573001	81574000	1000	*	1.7073e-05	0.00800367	-22.1984	Promoter (<=1kb)	11	81572502	81573539	1038	2	1700071K01Rik	NM_001033765.2	0	NM_001033765.2;NM_001034013.2	1700071K01Rik;Asic2	0;0	102	33	69	65	24	41	27	16	11	10	5	5	80	49	31
chr11	81634001	81635000	1000	*	1.32024e-27	4.25884e-23	-55.1667	Intron (NM_001034013.2/Asic2, intron 1 of 9)	11	81587020	81595467	8448	1	Gm11418	XR_880068.2	46981	NM_001034013.2	Asic2	0	109	39	70	59	6	53	93	83	10	74	71	3	65	32	33
chr11	85787001	85788000	1000	*	8.12242e-05	0.0232468	-33.4592	Intron (XM_006532537.3/Bcas3, intron 24 of 27)	11	85766833	85775680	8848	2	Bcas3os2	NR_046194.1	-11321	NR_077059.1;XM_006532537.3;XM_006532539.3;XM_017314342.1;XM_006532536.3;XM_006532538.2;XM_006532540.2;XM_017314343.1;XM_006532541.2;NM_001166642.1;NM_001166643.1;NM_138681.4	2610027K06Rik;Bcas3;Bcas3;Bcas3;Bcas3;Bcas3;Bcas3;Bcas3;Bcas3;Bcas3;Bcas3;Bcas3	44388;0;0;0;0;0;0;0;0;0;0;0	17	7	10	50	37	13	43	38	5	29	27	2	24	22	2
chr11	85976001	85977000	1000	*	7.11147e-09	1.92202e-05	23.3263	Distal Intergenic	11	85950468	85950973	506	1	LOC100861933	LOC100861933	25533	NA	NA	NA	37	32	5	36	27	9	15	12	3	65	7	58	27	22	5
chr11	86483001	86484000	1000	*	4.02499e-05	0.0145992	-41.7912	Promoter (<=1kb)	11	86484657	86499007	14351	1	Rnft1	NM_029788.5	-657	NM_029788.5	Rnft1	-657	35	10	25	6	1	5	25	16	9	10	6	4	39	27	12
chr11	87665001	87666000	1000	*	6.60826e-06	0.00400845	32.6852	Promoter (1-2kb)	11	87663652	87735539	71888	1	Rnf43	XM_011248844.2	1349	NM_172448.3;XM_011248844.2	Rnf43;Rnf43	0;0	13	13	0	20	19	1	6	5	1	6	4	2	27	12	15
chr11	90318001	90319000	1000	*	5.76364e-05	0.0184732	-24.4017	Distal Intergenic	11	90249476	90278573	29098	1	Mmd	NM_026178.2	68525	NA	NA	NA	75	15	60	20	7	13	78	35	43	10	4	6	24	17	7
chr11	90379001	90380000	1000	*	4.07432e-07	0.000474862	29.3988	Intron (XM_006533006.1/Hlf, intron 2 of 3)	11	90336535	90389583	53049	2	Hlf	XM_006533006.1	9583	XM_006533006.1;XM_006533007.2;XM_006533005.3;XM_006533004.1;NM_172563.3	Hlf;Hlf;Hlf;Hlf;Hlf	0;0;0;0;0	32	21	11	40	39	1	19	12	7	10	6	4	48	16	32
chr11	91777001	91778000	1000	*	2.17134e-06	0.00175959	-22.5961	Distal Intergenic	11	91575286	91577555	2270	2	Kif2b	NM_028547.2	-199446	NA	NA	NA	89	56	33	103	68	35	68	61	7	36	34	2	61	47	14
chr11	93866001	93867000	1000	*	1.30025e-06	0.0011799	-32.2168	Exon (NM_001013375.1/Utp18, exon 11 of 14)	11	93859243	93885766	26524	2	Utp18	NM_001013375.1	18766	NM_001013375.1	Utp18	0	31	19	12	23	14	9	35	32	3	31	31	0	52	46	6
chr11	93979001	93980000	1000	*	3.73736e-05	0.0138884	24.6667	Exon (XR_388959.2/Gm35198, exon 2 of 3)	11	93968601	93982695	14095	1	Gm35198	XR_388959.2	10400	XR_388959.2	Gm35198	0	22	22	0	32	32	0	6	3	3	8	8	0	25	19	6
chr11	94266001	94267000	1000	*	1.82553e-07	0.000250416	-25.1805	Downstream (2-3kb)	11	94269956	94271397	1442	2	Gm38953	XR_880145.1	4397	XR_880145.1;XR_880146.1	Gm38953;Gm38956	4397;10877	88	44	44	79	39	40	101	68	33	71	59	12	120	89	31
chr11	95040001	95041000	1000	*	7.55538e-05	0.0222086	45.8333	Promoter (<=1kb)	11	95026258	95040892	14635	2	Pdk2	XM_006532457.3	0	XR_001780300.1;XR_001780301.1;XR_880156.2;NM_001306071.1;XM_006532311.3;NM_013565.3;XM_006532310.3;NM_001306162.1;XM_006532457.3;NM_133667.2	Gm11513;Gm11513;Gm11513;Itga3;Itga3;Itga3;Itga3;Itga3;Pdk2;Pdk2	8993;8993;8993;28198;35336;35714;35757;35811;0;0	6	5	1	12	1	11	25	0	25	5	0	5	10	0	10
chr11	95042001	95043000	1000	*	0.000132488	0.0318482	27.7143	Promoter (<=1kb)	11	95026258	95041371	15114	2	Pdk2	NM_133667.2	-630	XR_001780300.1;XR_001780301.1;XR_880156.2;NM_001306071.1;XM_006532311.3;NM_013565.3;XM_006532310.3;NM_001306162.1;XM_006532457.3;NM_133667.2	Gm11513;Gm11513;Gm11513;Itga3;Itga3;Itga3;Itga3;Itga3;Pdk2;Pdk2	10993;10993;10993;26198;33336;33714;33757;33811;0;0	14	14	0	6	6	0	25	6	19	17	17	0	14	13	1
chr11	95391001	95392000	1000	*	0.000174062	0.0378973	24.7832	3' UTR	11	95385911	95391776	5866	1	Slc35b1	XM_006531986.2	5090	XM_006531985.1;NM_016752.1;XM_006531986.2	Slc35b1;Slc35b1;Slc35b1	0;0;0	27	26	1	48	43	5	10	5	5	13	12	1	37	23	14
chr11	96397001	96398000	1000	*	9.94253e-05	0.0264621	-24.4474	Distal Intergenic	11	96392074	96392699	626	1	Gm11531	Gm11531	4927	Gm11531	Gm11531	4927	50	15	35	22	16	6	17	11	6	22	16	6	20	18	2
chr11	96693001	96694000	1000	*	9.98386e-06	0.00542896	-44.6032	Intron (XM_006534508.3/Skap1, intron 4 of 11)	11	96626946	96678375	51430	1	Gm38448	XR_388996.3	66055	XM_006534508.3;XM_017314838.1;XM_017314839.1;NM_001033186.3;NM_001177898.1;NM_001177899.1	Skap1;Skap1;Skap1;Skap1;Skap1;Skap1	0;0;0;0;0;0	12	4	8	15	9	6	15	14	1	10	9	1	42	38	4
chr11	97796001	97797000	1000	*	0.000221296	0.043873	-29.1303	Promoter (<=1kb)	11	97797072	97797143	72	1	n-TCgca56	rna70405	-72	XM_006532341.1;NM_010688.4;rna70406;rna70405	Lasp1;Lasp1;n-TCgca51;n-TCgca56	-2005;-2672;1977;-72	29	19	10	25	11	14	120	98	22	5	4	1	10	9	1
chr11	97883001	97884000	1000	*	2.29043e-05	0.00981754	-30.4355	Promoter (<=1kb)	11	97851558	97884139	32582	2	Fbxo47	XM_006534328.3	139	XM_006534328.3;XM_006534329.3;XM_011249279.2;XM_006534332.2;XM_006534330.3;NM_001081435.1	Fbxo47;Fbxo47;Fbxo47;Fbxo47;Fbxo47;Fbxo47	0;0;0;0;0;0	73	1	72	15	1	14	5	0	5	7	6	1	17	3	14
chr11	99121001	99122000	1000	*	2.08104e-09	6.9554e-06	-33.1697	Distal Intergenic	11	99065678	99089306	23629	2	Tns4	NM_172564.3	-31695	NA	NA	NA	10	3	7	61	6	55	26	11	15	16	10	6	101	55	46
chr11	99229001	99230000	1000	*	7.92423e-05	0.0228627	-37.0057	Promoter (1-2kb)	11	99209047	99231017	21971	2	Smarce1	NM_020618.4	1017	XM_006533412.3;NM_172946.2;NM_020618.4;XM_006533827.3;XM_006533828.2;XM_011249158.1	Krt222;Krt222;Smarce1;Smarce1;Smarce1;Smarce1	14283;14067;0;0;0;0	25	3	22	16	12	4	22	19	3	16	15	1	57	35	22
chr11	99479001	99480000	1000	*	0.00010471	0.0274253	27.3245	Intron (NM_033373.1/Krt23, intron 7 of 7)	11	99477973	99493110	15138	2	Krt23	NM_033373.1	13110	NM_033373.1	Krt23	0	10	10	0	31	29	2	17	8	9	31	19	12	11	11	0
chr11	99480001	99481000	1000	*	3.72829e-05	0.0138753	44.6631	Exon (NM_033373.1/Krt23, exon 6 of 8)	11	99477973	99493110	15138	2	Krt23	NM_033373.1	12110	NM_033373.1	Krt23	0	25	24	1	28	25	3	11	3	8	6	1	5	10	10	0
chr11	100357001	100358000	1000	*	2.19932e-05	0.00955397	24.5397	Promoter (<=1kb)	11	100347327	100356350	9024	2	Hap1	XM_011248745.2	-651	Gm10039;NM_010404.3;NM_177981.2;XM_011248744.2;XM_011248745.2;XM_011248746.2	Gm10039;Hap1;Hap1;Hap1;Hap1;Hap1	4157;-860;-860;-655;-651;-653	43	33	10	45	37	8	39	20	19	30	21	9	62	27	35
chr11	100655001	100656000	1000	*	8.95888e-05	0.0248306	26.0168	Intron (XM_006533492.3/Zfp385c, intron 2 of 8)	11	100627543	100650891	23349	2	Zfp385c	XM_006533494.3	-4110	NM_177790.4;XM_006533494.3;XM_006533492.3;XM_006533488.3;XM_017314581.1;XM_017314582.1;XM_017314583.1;XM_006533495.2	Zfp385c;Zfp385c;Zfp385c;Zfp385c;Zfp385c;Zfp385c;Zfp385c;Zfp385c	-4308;-4110;0;0;0;0;0;0	44	41	3	10	5	5	16	10	6	9	2	7	25	13	12
chr11	101618001	101619000	1000	*	3.07238e-08	6.3479e-05	28.1327	Distal Intergenic	11	101610700	101616638	5939	1	LOC666331	XM_006533962.2	7301	NM_001256318.1;XM_006533962.2	LOC666331;LOC666331	7301;7301	51	14	37	69	27	42	66	6	60	17	0	17	47	3	44
chr11	101953001	101954000	1000	*	7.50068e-05	0.0221259	-51.5079	Promoter (<=1kb)	11	101952421	101960574	8154	1	4930417O22Rik	NR_045806.1	580	NR_045806.1	4930417O22Rik	0	12	2	10	21	8	13	16	8	8	15	13	2	10	10	0
chr11	101986001	101987000	1000	*	4.42838e-11	2.33298e-07	-59.761	Promoter (<=1kb)	11	101971141	101986977	15837	2	Dusp3	XM_006534305.2	0	NM_029287.1;XM_006534305.2;XM_006534306.1;NM_028207.3	1700006E09Rik;Dusp3;Dusp3;Dusp3	-56;0;0;-1210	58	2	56	23	1	22	62	11	51	20	17	3	17	15	2
chr11	102347001	102348000	1000	*	1.9212e-05	0.0086932	-35.0195	Downstream (<1kb)	11	102348820	102365281	16462	2	Slc4a1	NM_011403.2	17281	NM_011403.2	Slc4a1	17281	15	11	4	54	23	31	11	11	0	5	5	0	38	30	8
chr11	102924001	102925000	1000	*	8.1842e-09	2.15942e-05	-21.9294	Promoter (<=1kb)	11	102905518	102925124	19607	2	Kif18b	NM_197959.2	124	NM_197959.2;XM_011249243.1	Kif18b;Kif18b	0;0	117	18	99	29	19	10	42	28	14	23	16	7	55	28	27
chr11	103029001	103030000	1000	*	0.000259372	0.0482643	-35.5135	Promoter (<=1kb)	11	103028562	103066105	37544	1	Nmt1	NM_008707.3	439	XM_006534038.2;XM_006532445.3;NM_008707.3	Dcakd;Nmt1;Nmt1	-762;0;0	10	4	6	44	15	29	36	28	8	22	21	1	54	24	30
chr11	103796001	103797000	1000	*	8.17403e-05	0.023341	38.0896	Intron (NM_009521.2/Wnt3, intron 1 of 4)	11	103810939	103816405	5467	1	Wnt3	XM_006533168.1	-13939	NM_009521.2	Wnt3	0	69	58	11	15	9	6	5	2	3	55	34	21	12	0	12
chr11	104491001	104492000	1000	*	3.529e-12	2.48521e-08	-48.1269	Distal Intergenic	11	104334002	104469508	135507	2	Kansl1	XM_006534447.3	-21493	NA	NA	NA	45	22	23	16	6	10	37	36	1	45	36	9	60	58	2
chr11	104984001	104985000	1000	*	4.20875e-08	8.17232e-05	-27.4857	Exon (XM_017314877.1/LOC105242472, exon 96 of 108)	11	105008985	105117537	108553	1	Efcab3	XM_017314765.1	-23985	XM_017314877.1	LOC105242472	0	37	18	19	15	13	2	60	59	1	12	12	0	31	27	4
chr11	105127001	105128000	1000	*	1.81031e-05	0.00832085	44.0664	Promoter (<=1kb)	11	105126432	105139554	13123	1	Mettl2	XM_006533714.1	569	NM_172567.3;XM_006533715.2;XM_006533714.1	Mettl2;Mettl2;Mettl2	0;0;0	37	25	12	16	13	3	25	11	14	37	10	27	5	1	4
chr11	105179001	105180000	1000	*	1.75193e-05	0.00814852	-23.2775	Promoter (<=1kb)	11	105178807	105283959	105153	1	Tlk2	NM_001294331.1	194	NR_027956.1;XR_001780005.1;XM_006533316.3;XM_006533314.3;XM_006533315.3;XM_017314551.1;XM_017314550.1;NM_001294331.1;XM_006533312.3;NM_001294330.1;NM_001294334.1;XR_001780006.1;NM_001112705.2;NM_001294329.1;XM_017314552.1;XM_011249014.2;XM_006533320.3;XM_006533313.3	1700052K11Rik;Tlk2;Tlk2;Tlk2;Tlk2;Tlk2;Tlk2;Tlk2;Tlk2;Tlk2;Tlk2;Tlk2;Tlk2;Tlk2;Tlk2;Tlk2;Tlk2;Tlk2	0;0;0;0;0;0;0;0;-497;-1527;-1527;-1527;-1527;-1527;-1531;-1532;-2073;-2073	7	7	0	19	7	12	34	34	0	29	25	4	36	32	4
chr11	105960001	105961000	1000	*	9.55506e-07	0.000934938	-20.4906	Distal Intergenic	11	105967945	105989964	22020	1	Ace	NM_001281819.1	-6945	NR_104047.1	Gm11651	24694	88	24	64	18	16	2	15	15	0	28	24	4	28	14	14
chr11	107084001	107085000	1000	*	2.37488e-06	0.00187589	39.4444	Intron (NM_176850.2/Bptf, intron 4 of 27)	11	107033081	107131922	98842	2	Bptf	NM_176850.2	46922	NM_176850.2;XM_006532675.1;XM_006532676.1;XM_006532678.1;XM_006532679.1;XM_006532680.1;XM_006532681.1;XM_006532682.1;XM_006532683.1;XM_006532684.3;XM_006532685.1;XM_006532687.1;XM_006532688.1;XM_006532689.1;XM_006532690.1;XM_006532691.1;XM_017314399.1;XM_006532677.2;XM_006532686.2	Bptf;Bptf;Bptf;Bptf;Bptf;Bptf;Bptf;Bptf;Bptf;Bptf;Bptf;Bptf;Bptf;Bptf;Bptf;Bptf;Bptf;Bptf;Bptf	0;0;0;0;0;0;0;0;0;0;0;0;0;0;0;0;0;0;0	13	13	0	21	21	0	12	9	3	5	3	2	15	7	8
chr11	107212001	107213000	1000	*	0.000166061	0.0368536	31.0348	3' UTR	11	107204160	107205839	1680	1	Gm39425	XR_001780344.1	7841	XM_006534263.3;NM_145823.2;XM_006534262.3;XM_006534264.3	Pitpnc1;Pitpnc1;Pitpnc1;Pitpnc1	0;0;0;0	25	18	7	19	11	8	76	28	48	51	15	36	31	11	20
chr11	108254001	108255000	1000	*	7.59419e-05	0.0222704	-22.8101	Intron (NM_011101.3/Prkca, intron 2 of 16)	11	107933387	108343888	410502	2	Prkca	NM_011101.3	88888	NM_011101.3	Prkca	0	50	33	17	43	20	23	26	21	5	28	27	1	5	3	2
chr11	108345001	108346000	1000	*	3.73277e-09	1.11759e-05	-24.1538	Promoter (<=1kb)	11	108344359	108349578	5220	1	LOC108167932	XR_001780347.1	642	XR_001780347.1;NM_011101.3	LOC108167932;Prkca	0;0	63	42	21	57	46	11	30	30	0	42	40	2	58	57	1
chr11	108841001	108842000	1000	*	3.68784e-05	0.0137521	20.6335	Intron (XM_006534425.3/Cep112, intron 24 of 26)	11	108826689	108855754	29066	2	Gm36818	XR_389099.3	13754	XM_006534425.3;NM_029606.3;XM_006534423.3;XM_006534424.3;XM_017314819.1;XM_011249300.2;XM_011249301.2;NM_145688.2;NM_029586.2;XR_389099.3;XR_001780348.1	Cep112;Cep112;Cep112;Cep112;Cep112;Cep112;Cep112;Cep112;Cep112;Gm36818;Gm36818	0;0;0;0;0;0;0;0;0;0;0	42	39	3	27	26	1	19	16	3	6	5	1	35	19	16
chr11	109011001	109012000	1000	*	2.27244e-31	9.88016e-27	22.9721	Intron (XR_389100.3/Gm36876, intron 3 of 3)	11	108981494	109034783	53290	1	Gm36876	XR_389100.3	29507	XR_389100.3	Gm36876	0	768	380	388	927	605	322	802	346	456	828	363	465	333	54	279
chr11	109012001	109013000	1000	*	1.49452e-08	3.5754e-05	24.5717	Intron (XR_389100.3/Gm36876, intron 3 of 3)	11	108981494	109034783	53290	1	Gm36876	XR_389100.3	30507	XR_389100.3	Gm36876	0	157	83	74	196	123	73	181	72	109	161	65	96	46	9	37
chr11	109135001	109136000	1000	*	2.32592e-05	0.00991017	-29.6376	Distal Intergenic	11	109139291	109144369	5079	2	E030025P04Rik	NR_037978.1	8369	NR_037978.1	E030025P04Rik	8369	49	26	23	52	23	29	38	30	8	43	29	14	26	23	3
chr11	109332001	109333000	1000	*	1.5284e-07	0.000217411	50.5712	Distal Intergenic	11	109343878	109344778	901	1	LOC105243551	XR_001780138.1	-10878	NA	NA	NA	19	19	0	29	24	5	5	4	1	12	4	8	11	1	10
chr11	109471001	109472000	1000	*	0.000254619	0.0477082	-27.7118	Promoter (1-2kb)	11	109452808	109473111	20304	2	Slc16a6	XM_006531946.3	1111	XM_006534348.2;XM_006534349.3;NM_028710.3;NM_134038.2;NM_001029842.1;XM_006531947.2;XM_006531946.3;XM_017314216.1	Arsg;Arsg;Arsg;Slc16a6;Slc16a6;Slc16a6;Slc16a6;Slc16a6	-1334;-1341;-1374;0;0;-4642;0;0	54	19	35	71	16	55	42	3	39	38	28	10	27	24	3
chr11	109950001	109951000	1000	*	4.16555e-05	0.0149532	20.1243	Exon (XM_006533463.3/Abca8b, exon 22 of 38)	11	109927805	109930588	2784	2	Gm39444	XR_880288.2	-19413	XM_006533463.3;XM_006533460.3;XM_006533461.3;XM_006533459.3;XM_006533462.3;NM_013851.2;XM_006533464.3	Abca8b;Abca8b;Abca8b;Abca8b;Abca8b;Abca8b;Abca8b	0;0;0;0;0;0;44816	39	38	1	44	44	0	17	13	4	5	4	1	29	23	6
chr11	110884001	110885000	1000	*	0.000202285	0.0416198	23.15	Distal Intergenic	11	110968033	111027968	59936	1	Kcnj16	NM_001252207.1	-83033	NA	NA	NA	11	11	0	40	38	2	39	25	14	25	20	5	38	30	8
chr11	111543001	111544000	1000	*	7.74783e-17	1.12287e-12	-44.5235	Distal Intergenic	11	111511565	111512514	950	2	Gm30158	XR_389109.1	-30487	NA	NA	NA	69	22	47	81	43	38	46	43	3	65	50	15	64	58	6
chr11	111658001	111659000	1000	*	2.46407e-05	0.0103402	-22.094	Promoter (<=1kb)	11	111637329	111658655	21327	2	Gm30219	XR_389112.1	0	XR_001780139.1;XR_880296.1;XR_389112.1;XR_389110.1	Gm30219;Gm30219;Gm30219;Gm30219	0;-1070;0;0	36	14	22	5	4	1	30	23	7	30	25	5	26	22	4
chr11	112055001	112056000	1000	*	1.72503e-07	0.000240254	61.6162	Distal Intergenic	11	112156600	112174941	18342	1	Gm39461	XR_880297.1	-100600	NA	NA	NA	11	5	6	18	17	1	5	0	5	11	0	11	24	6	18
chr11	112150001	112151000	1000	*	3.25978e-06	0.0024093	41.1607	Distal Intergenic	11	112156600	112174941	18342	1	Gm39461	XR_880297.1	-5600	NA	NA	NA	48	37	11	20	20	0	28	9	19	24	12	12	45	27	18
chr11	113264001	113265000	1000	*	0.000130041	0.0315556	20.7186	Intron (XM_006534134.3/Slc39a11, intron 7 of 9)	11	113217679	113219280	1602	2	Gm39505	XR_880299.2	-44721	XM_006534134.3;XM_006534127.3;XM_006534130.3;XM_011249234.2;XM_011249238.2;XM_011249240.2;XM_011249233.1;XM_011249230.1;XM_011249231.1;XM_011249232.1;XM_011249236.2;XM_011249239.2;XM_011249235.2;XM_011249237.2;XM_017314742.1;XM_017314743.1;NM_001166503.1;NM_027216.5	Slc39a11;Slc39a11;Slc39a11;Slc39a11;Slc39a11;Slc39a11;Slc39a11;Slc39a11;Slc39a11;Slc39a11;Slc39a11;Slc39a11;Slc39a11;Slc39a11;Slc39a11;Slc39a11;Slc39a11;Slc39a11	0;0;0;0;0;0;0;0;0;0;0;0;0;0;0;0;0;0	19	19	0	16	16	0	50	41	9	66	51	15	42	33	9
chr11	116025001	116026000	1000	*	0.000162995	0.0363945	41.2589	Promoter (<=1kb)	11	116022291	116025450	3160	2	H3f3b	XM_006532248.2	0	NM_008211.3;XM_006532248.2;XR_001779963.1;XR_001779964.1;XR_001779962.1;XM_006533088.3;XM_006533089.2;NM_001286006.1;NM_172569.4;XM_017314490.1	H3f3b;H3f3b;Unk;Unk;Unk;Unk;Unk;Unk;Unk;Unk	-497;0;-2467;-2467;-2469;-2470;-2470;-4316;-4316;-4518	18	18	0	21	20	1	29	21	8	6	1	5	25	20	5
chr11	116199001	116200000	1000	*	4.12999e-13	3.5913e-09	-26.9908	Promoter (<=1kb)	11	116171883	116199045	27163	2	Acox1	NM_001271898.1	0	NM_001271898.1;NM_015729.3;XM_006532002.3;NM_027107.1	Acox1;Acox1;Acox1;Ten1	0;0;-140;0	54	0	54	10	0	10	5	0	5	43	27	16	11	2	9
chr11	117106001	117107000	1000	*	2.68735e-09	8.61658e-06	-32.7968	Distal Intergenic	11	117115172	117128763	13592	1	Sec14l1	NR_029459.1	-8172	NA	NA	NA	33	11	22	20	19	1	42	40	2	23	22	1	21	21	0
chr11	117476001	117477000	1000	*	1.0216e-06	0.000981769	47.4728	Downstream (2-3kb)	11	117479572	117483051	3480	2	Gm34418	XR_389180.3	6051	XR_389180.3	Gm34418	6051	17	14	3	27	25	2	5	2	3	5	3	2	15	3	12
chr11	119694001	119695000	1000	*	0.000119085	0.0297176	-21.7647	Intron (NM_001306081.1/Rptor, intron 3 of 32)	11	119655949	119899413	243465	1	Rptor	XM_006534362.1	38052	NM_001306081.1;NM_028898.3;XM_006534361.3;XM_006534363.2;XM_006534362.1	Rptor;Rptor;Rptor;Rptor;Rptor	0;0;0;0;0	5	4	1	17	13	4	39	39	0	10	10	0	17	17	0
chr11	119735001	119736000	1000	*	2.40838e-06	0.00189783	22.3309	Intron (NM_001306081.1/Rptor, intron 4 of 32)	11	119655949	119899413	243465	1	Rptor	XM_006534362.1	79052	NM_001306081.1;NM_028898.3;XM_006534361.3;XM_006534363.2;XM_006534362.1	Rptor;Rptor;Rptor;Rptor;Rptor	0;0;0;0;0	32	29	3	33	26	7	17	12	5	5	4	1	52	19	33
chr11	120428001	120429000	1000	*	1.77306e-05	0.00822003	-22.5	Exon (NM_001195023.1/Nploc4, exon 3 of 17)	11	120380370	120437251	56882	2	Nploc4	XM_006533134.2	8251	NM_001195023.1;NM_199469.2;XM_006533134.2	Nploc4;Nploc4;Nploc4	0;0;0	20	15	5	10	8	2	21	21	0	20	20	0	31	31	0
chr11	120457001	120458000	1000	*	1.06502e-08	2.67593e-05	-63.7143	Promoter (<=1kb)	11	120456601	120458050	1450	2	Oxld1	XM_006533941.3	50	NM_152807.3;XM_006533981.1;XM_006533982.2;XM_006533941.3;NM_025560.2;NM_012065.3;NR_126089.1	Ccdc137;Ccdc137;Ccdc137;Oxld1;Oxld1;Pde6g;Pde6g	-129;-142;-1583;0;0;-3501;-3501	15	0	15	5	0	5	28	16	12	25	21	4	36	18	18
chr11	120903001	120904000	1000	*	0.000131229	0.0317139	23.7708	Exon (XM_006534234.3/Ccdc57, exon 3 of 18)	11	120826529	120919559	93031	2	Ccdc57	XM_006534234.3	15559	XM_006534234.3;XM_017314767.1;XR_001780051.1;XR_001780052.1;XR_001780053.1;XR_388531.1;NM_027745.1;XM_006534233.1;XM_006534236.1;XM_006534235.1;XM_006534238.3;XM_006534240.3	Ccdc57;Ccdc57;Ccdc57;Ccdc57;Ccdc57;Ccdc57;Ccdc57;Ccdc57;Ccdc57;Ccdc57;Ccdc57;Ccdc57	0;0;0;0;0;0;0;0;0;0;0;0	17	14	3	31	29	2	21	15	6	30	23	7	45	20	25
chr11	121831001	121832000	1000	*	3.50942e-05	0.0132808	43.4524	Promoter (<=1kb)	11	121830240	121840311	10072	1	Ptchd3	XM_006534383.3	761	NM_029049.1;XM_006534383.3	Ptchd3;Ptchd3	0;0	6	6	0	14	13	1	56	19	37	10	5	5	36	27	9
chr12	4768001	4769000	1000	*	7.73287e-09	2.06339e-05	-29.6324	Promoter (<=1kb)	12	4738397	4768996	30600	2	Fam228b	XM_006515036.3	0	XM_006515036.3;XM_006515031.2;XM_006515029.3;XM_006515033.3;XM_006515035.3;XM_006515038.3;XM_011243844.2;XM_011243847.2;XM_011243849.2;XM_006515030.2;XR_001780441.1;XR_001780442.1;XM_006515037.3;XM_006515032.3;XM_011243848.2;XM_011243850.2;XM_011243846.2;NM_175431.4;XM_017315009.1;XM_006515140.2;NM_028376.3;XM_006515139.2;XM_006515138.2;XM_006515141.3	Fam228b;Fam228b;Fam228b;Fam228b;Fam228b;Fam228b;Fam228b;Fam228b;Fam228b;Fam228b;Fam228b;Fam228b;Fam228b;Fam228b;Fam228b;Fam228b;Fam228b;Fam228b;Fam228b;Pfn4;Pfn4;Pfn4;Pfn4;Pfn4	0;0;0;0;0;0;0;0;0;0;0;0;0;0;0;0;0;0;0;-167;-295;-339;-367;-4627	10	0	10	66	0	66	15	6	9	17	3	14	32	10	22
chr12	6287001	6288000	1000	*	3.88481e-05	0.0142562	25.0004	Distal Intergenic	12	6280751	6282420	1670	2	Gm4927	Gm4927	-4581	Gm4927	Gm4927	-4581	33	19	14	70	49	21	49	13	36	46	25	21	31	11	20
chr12	8573001	8574000	1000	*	3.90626e-06	0.00275671	34.1867	Intron (XR_872469.2/5033421B08Rik, intron 3 of 3)	12	8528483	8599066	70584	2	Slc7a15	NM_177802.3	25066	XR_872469.2;XR_872470.2;XR_001780546.1;NM_177802.3	5033421B08Rik;5033421B08Rik;5033421B08Rik;Slc7a15	0;0;0;0	41	27	14	48	39	9	70	36	34	30	9	21	30	11	19
chr12	10422001	10423000	1000	*	2.66101e-06	0.00204851	26.9136	Distal Intergenic	12	10446388	10531303	84916	1	Gm38407	NR_110487.1	-23388	NA	NA	NA	23	23	0	14	14	0	10	6	4	5	5	0	27	16	11
chr12	10781001	10782000	1000	*	2.63986e-06	0.0020385	-25.1618	Distal Intergenic	12	10723794	10724587	794	2	Gm4928	Gm4928	-56414	NA	NA	NA	24	17	7	61	42	19	51	47	4	14	13	1	32	32	0
chr12	11910001	11911000	1000	*	3.98616e-08	7.83136e-05	-24.1312	Distal Intergenic	12	11882196	11882899	704	2	Tubb2a-ps2	NR_003964.2	-27102	NA	NA	NA	109	43	66	117	65	52	84	60	24	98	75	23	121	81	40
chr12	12936001	12937000	1000	*	1.09178e-05	0.00578581	-25.5774	3' UTR	12	12936093	12941836	5744	2	Mycn	NM_008709.3	4836	NM_008709.3	Mycn	0	25	22	3	22	13	9	21	21	0	19	19	0	38	37	1
chr12	14115001	14116000	1000	*	0.000245524	0.0467664	-43.4609	Distal Intergenic	12	14147598	14152038	4441	2	Fam84a	NM_029007.2	36038	NA	NA	NA	6	2	4	11	8	3	13	13	0	20	20	0	19	17	2
chr12	14415001	14416000	1000	*	4.8842e-06	0.00320532	40.7941	Distal Intergenic	12	14279418	14283646	4229	2	Gm40840	XR_872501.1	-131355	NA	NA	NA	10	10	0	29	27	2	10	4	6	5	5	0	11	3	8
chr12	15813001	15814000	1000	*	0.000252099	0.0474315	24.4619	Promoter (2-3kb)	12	15791727	15816785	25059	2	Trib2	NM_144551.5	2785	XR_001780549.1;XR_001780550.1;XR_001780551.1;XM_006515054.1;XM_006515055.2;NM_144551.5	Gm5432;Gm5432;Gm5432;Trib2;Trib2;Trib2	-2951;-2951;-2951;0;0;0	36	31	5	16	8	8	26	17	9	16	5	11	41	14	27
chr12	16308001	16309000	1000	*	1.55685e-06	0.00135733	31.2885	Distal Intergenic	12	16205066	16232231	27166	2	Gm36372	XR_381302.3	-75770	NA	NA	NA	26	26	0	28	26	2	17	11	6	28	23	5	35	17	18
chr12	16586001	16587000	1000	*	1.51619e-05	0.00732459	-32.3708	Promoter (2-3kb)	12	16537338	16589720	52383	2	Lpin1	XM_006514986.3	2720	NM_001130412.1;NM_015763.4;NM_172950.3;XM_006514975.3;XM_006514988.3;XM_006514977.3;XM_006514986.3;XM_011243815.2;XM_006514984.3;XM_006514983.3;XM_006514987.3;XM_006514982.3;XM_006514976.3;XM_006514978.3	Lpin1;Lpin1;Lpin1;Lpin1;Lpin1;Lpin1;Lpin1;Lpin1;Lpin1;Lpin1;Lpin1;Lpin1;Lpin1;Lpin1	0;0;0;0;0;0;0;0;0;0;0;0;0;0	10	8	2	22	10	12	34	29	5	17	17	0	21	21	0
chr12	17325001	17326000	1000	*	3.02728e-06	0.00227958	27.2822	Promoter (<=1kb)	12	17284722	17325373	40652	2	Atp6v1c2	XM_006515196.3	0	NM_001159632.1;NM_133699.2;XM_006515199.3;XM_006515198.3;XM_006515196.3;XM_017315175.1	Atp6v1c2;Atp6v1c2;Atp6v1c2;Atp6v1c2;Atp6v1c2;Atp6v1c2	-271;-271;-214;-212;0;0	49	37	12	41	41	0	69	44	25	64	35	29	81	51	30
chr12	19673001	19674000	1000	*	5.01515e-06	0.00326979	39.0895	Distal Intergenic	12	19735185	19736969	1785	1	Gm40880	XR_001780513.1	-61185	NA	NA	NA	26	22	4	26	22	4	17	9	8	20	4	16	11	7	4
chr12	22701001	22702000	1000	*	3.20959e-08	6.56358e-05	24.8227	Promoter (2-3kb)	12	22408743	22698729	289987	2	Gm9295	XM_017315309.1	-2272	XM_017315309.1;XM_011243951.2	Gm9295;Gm9295	-2272;-3319	64	60	4	64	63	1	13	10	3	38	23	15	55	42	13
chr12	25047001	25048000	1000	*	2.59979e-06	0.00201534	-20.4675	Exon (XM_006515259.2/Kidins220, exon 28 of 33)	12	25093799	25096092	2294	2	Id2	NM_010496.3	48092	XM_006515259.2;XM_017315243.1;XM_017315244.1;XM_006515260.3;XM_006515250.3;XM_006515251.3;XM_006515249.3;XM_006515252.3;XM_006515256.3;XM_006515253.3;XM_006515254.3;XM_006515255.3;XM_006515257.3;XM_006515258.3;NM_001081378.1	Kidins220;Kidins220;Kidins220;Kidins220;Kidins220;Kidins220;Kidins220;Kidins220;Kidins220;Kidins220;Kidins220;Kidins220;Kidins220;Kidins220;Kidins220	0;0;0;0;0;0;0;0;0;0;0;0;0;0;0	48	41	7	29	21	8	39	39	0	54	53	1	18	18	0
chr12	27863001	27864000	1000	*	0.000145076	0.0338692	-32.5947	Distal Intergenic	12	27946177	27982613	36437	1	LOC108167330	XR_381390.2	-82177	NA	NA	NA	27	15	12	16	11	5	15	14	1	11	11	0	11	10	1
chr12	30469001	30470000	1000	*	9.15081e-05	0.0252182	-61.0823	Promoter (1-2kb)	12	30410559	30467358	56800	2	2310016D03Rik	NR_045491.1	-1643	NR_045491.1	2310016D03Rik	-1643	10	6	4	5	0	5	35	32	3	11	9	2	5	5	0
chr12	30878001	30879000	1000	*	0.000162827	0.0363778	-27.8283	Distal Intergenic	12	30882929	30893849	10921	1	Fam150b	XM_017314913.1	-3929	XM_017314913.1	Fam150b	-3929	5	3	2	27	13	14	16	12	4	11	9	2	54	48	6
chr12	31151001	31152000	1000	*	2.06214e-10	9.31797e-07	-27.3143	Distal Intergenic	12	31168862	31185922	17061	1	6030469F06Rik	NR_102715.1	-16862	NA	NA	NA	49	11	38	39	9	30	82	42	40	5	1	4	81	64	17
chr12	31547001	31548000	1000	*	9.60697e-12	6.23829e-08	-35.1577	Exon (XM_017315068.1/Slc26a4, exon 4 of 20)	12	31519814	31559871	40058	2	Slc26a4	XM_017315068.1	11871	XM_017315068.1;XM_006515091.1;XM_006515092.3;NM_011867.3;XM_011243870.2	Slc26a4;Slc26a4;Slc26a4;Slc26a4;Slc26a4	0;0;0;0;0	122	29	93	44	25	19	118	67	51	38	32	6	41	35	6
chr12	32208001	32209000	1000	*	1.37162e-06	0.00123015	-30.8152	Promoter (<=1kb)	12	32173129	32208498	35370	2	Pik3cg	XR_001780451.1	0	XR_001780451.1;XR_872416.1;NM_001146201.1;NM_020272.2;NM_001146200.1;XM_006515112.3;XM_006515113.3	Pik3cg;Pik3cg;Pik3cg;Pik3cg;Pik3cg;Pik3cg;Pik3cg	0;0;0;0;0;0;0	72	20	52	15	10	5	35	22	13	13	12	1	19	15	4
chr12	32297001	32298000	1000	*	1.97867e-07	0.000267672	47.3824	Distal Intergenic	12	32246403	32248617	2215	1	Gm33308	XR_381434.3	50598	NA	NA	NA	5	5	0	22	21	1	29	9	20	5	5	0	5	1	4
chr12	33303001	33304000	1000	*	0.000121049	0.0300295	-23.9161	Promoter (<=1kb)	12	33302515	33368277	65763	1	Atxn7l1	NM_001033436.3	486	XM_006515123.3;XM_006515126.3;XM_006515128.3;XM_006515125.3;XM_006515130.3;XM_006515124.3;XM_006515129.3;XM_006515134.3;XM_006515133.1;NM_001033436.3	Atxn7l1;Atxn7l1;Atxn7l1;Atxn7l1;Atxn7l1;Atxn7l1;Atxn7l1;Atxn7l1;Atxn7l1;Atxn7l1	0;0;0;0;0;0;0;0;0;0	57	38	19	38	28	10	61	54	7	15	15	0	16	15	1
chr12	35201001	35202000	1000	*	3.57164e-09	1.0856e-05	32.5123	Distal Intergenic	12	35194811	35194897	87	2	Mir680-3	NR_030449.1	-6104	NA	NA	NA	55	53	2	24	24	0	15	10	5	26	18	8	54	33	21
chr12	36173001	36174000	1000	*	0.000262584	0.0486176	-29.9886	Intron (NM_146033.3/Ankmy2, intron 3 of 9)	12	36169609	36197291	27683	1	Ankmy2	XM_006515066.3	3392	NM_146033.3;XM_006515066.3	Ankmy2;Ankmy2	0;0	57	20	37	105	58	47	22	14	8	5	4	1	33	27	6
chr12	36301001	36302000	1000	*	5.38095e-08	9.78354e-05	-39.4989	Distal Intergenic	12	36314169	36318452	4284	1	Sostdc1	NM_025312.3	-12169	NA	NA	NA	61	23	38	33	7	26	41	32	9	51	30	21	40	28	12
chr12	36302001	36303000	1000	*	3.17125e-09	9.94123e-06	-27.1997	Distal Intergenic	12	36314169	36318452	4284	1	Sostdc1	NM_025312.3	-11169	NA	NA	NA	15	0	15	64	5	59	31	9	22	17	0	17	56	36	20
chr12	36318001	36319000	1000	*	2.20515e-06	0.0017727	-34.8471	3' UTR	12	36314169	36318452	4284	1	Sostdc1	NM_025312.3	3832	NM_025312.3	Sostdc1	0	44	10	34	15	1	14	46	20	26	17	8	9	105	61	44
chr12	36475001	36476000	1000	*	0.000153851	0.0350537	-36.0606	Intron (XM_006515244.3/Ispd, intron 4 of 9)	12	36539304	36539927	624	1	Gm7252	Gm7252	-63304	XM_006515244.3;XM_011243909.2;XM_011243907.2;NM_001289504.1;NM_001289502.1;NM_178629.6;XM_011243910.1;NM_001289503.1	Ispd;Ispd;Ispd;Ispd;Ispd;Ispd;Ispd;Ispd	0;0;0;0;0;0;0;0	5	2	3	66	58	8	20	20	0	28	28	0	12	12	0
chr12	39073001	39074000	1000	*	0.000255005	0.0477623	-32.2285	Downstream (<1kb)	12	38998654	38998923	270	1	Gm19563	Gm19563	74347	XR_381459.1;XR_381460.1	Gm34809;Gm34809	80735;80735	43	27	16	35	5	30	28	22	6	33	25	8	69	40	29
chr12	39935001	39936000	1000	*	7.12722e-05	0.0214224	-42.8143	Distal Intergenic	12	39942477	39950626	8150	2	Gm40399	XR_872690.1	14626	NA	NA	NA	43	25	18	5	2	3	23	22	1	5	5	0	5	4	1
chr12	42251001	42252000	1000	*	6.99462e-05	0.0211455	-20.3704	Distal Intergenic	12	42415075	42415146	72	2	Trnae-cuc	rna73990	163146	NA	NA	NA	12	12	0	27	16	11	13	13	0	7	7	0	15	15	0
chr12	45081001	45082000	1000	*	6.47607e-05	0.0200436	-21.191	Distal Intergenic	12	44852486	45074483	221998	2	Stxbp6	NM_144552.3	-6518	NA	NA	NA	23	12	11	44	24	20	25	22	3	5	2	3	23	22	1
chr12	48634001	48635000	1000	*	0.000152396	0.0348465	-32.9243	Promoter (1-2kb)	12	48632240	48632688	449	1	Gm29818	Gm29818	1761	Gm29818	Gm29818	1761	18	9	9	21	12	9	65	56	9	15	11	4	11	11	0
chr12	50269001	50270000	1000	*	1.12662e-06	0.00106486	34.249	Distal Intergenic	12	50198069	50222058	23990	2	Gm34523	XR_381578.1	-46943	NA	NA	NA	32	23	9	38	35	3	91	48	43	28	9	19	12	7	5
chr12	50402001	50403000	1000	*	1.0014e-05	0.00543647	-41.6067	Intron (XM_006515590.3/Prkd1, intron 4 of 17)	12	50341226	50435429	94204	2	Prkd1	XM_006515590.3	32429	XM_006515590.3;XM_011244017.1;XM_006515586.1;XM_006515587.1;XR_001780427.1;XR_001780428.1;XR_001780429.1;XR_001780430.1;XR_001780431.1;XR_001780432.1;NM_008858.3;XM_006515591.1	Prkd1;Prkd1;Prkd1;Prkd1;Prkd1;Prkd1;Prkd1;Prkd1;Prkd1;Prkd1;Prkd1;Prkd1	0;0;0;0;0;0;0;0;0;0;0;0	7	3	4	16	8	8	68	62	6	45	41	4	22	18	4
chr12	50901001	50902000	1000	*	0.000174682	0.0379744	-21.3857	Distal Intergenic	12	50980713	50987863	7151	1	Gm34581	XR_872741.1	-78713	NA	NA	NA	30	25	5	32	23	9	19	19	0	6	6	0	33	32	1
chr12	51175001	51176000	1000	*	4.87424e-07	0.000544686	27.281	Distal Intergenic	12	51126884	51157113	30230	2	Gm34745	XR_872744.2	-17888	NA	NA	NA	105	86	19	24	19	5	45	21	24	57	34	23	58	31	27
chr12	51567001	51568000	1000	*	6.11641e-09	1.7085e-05	43.4632	Distal Intergenic	12	51593273	51605767	12495	1	Coch	XM_017314943.1	-25273	NA	NA	NA	20	15	5	47	31	16	46	9	37	27	4	23	15	7	8
chr12	52104001	52105000	1000	*	1.70677e-06	0.00145629	30.6244	Intron (NM_029760.2/Nubpl, intron 3 of 10)	12	52097746	52310959	213214	1	Nubpl	NM_029760.2	6255	NM_029760.2	Nubpl	0	38	32	6	45	38	7	78	42	36	38	21	17	25	13	12
chr12	52166001	52167000	1000	*	1.51116e-05	0.00731091	-20.2697	Intron (NM_029760.2/Nubpl, intron 4 of 10)	12	52132366	52310970	178605	1	Nubpl	XM_006516363.1	33635	NM_029760.2;XM_006516363.1	Nubpl;Nubpl	0;0	12	9	3	46	38	8	36	35	1	17	17	0	57	57	0
chr12	52265001	52266000	1000	*	0.000140413	0.0331163	23.4266	Promoter (<=1kb)	12	52265695	52310970	45276	1	Nubpl	XM_006516362.2	0	NM_029760.2;XM_006516363.1;XM_006516362.2	Nubpl;Nubpl;Nubpl	0;0;0	33	32	1	5	5	0	26	16	10	11	7	4	5	5	0
chr12	52912001	52913000	1000	*	6.88846e-05	0.0209248	22.3258	Intron (XM_006515821.3/Akap6, intron 6 of 14)	12	52854659	53155565	300907	1	Akap6	XM_006515829.3	57342	XM_006515821.3;XM_006515822.3;XM_006515828.3;XM_017315055.1;NM_198111.2;XM_006515826.3;XM_006515825.3;XM_006515827.3;XM_006515824.3;XM_006515829.3	Akap6;Akap6;Akap6;Akap6;Akap6;Akap6;Akap6;Akap6;Akap6;Akap6	0;0;0;0;0;0;0;0;0;0	44	37	7	40	36	4	28	15	13	67	38	29	31	26	5
chr12	53707001	53708000	1000	*	4.8287e-06	0.00318752	-24.2382	Intron (XM_006515941.2/Npas3, intron 5 of 12)	12	53834936	53846520	11585	1	Gm35614	XR_381599.2	-126936	XM_006515941.2;XM_006515942.2;XM_006515943.2;NM_013780.2;XM_006515938.2;XM_006515939.2;XM_006515940.2	Npas3;Npas3;Npas3;Npas3;Npas3;Npas3;Npas3	0;0;0;0;0;0;0	164	40	124	113	32	81	9	7	2	75	3	72	120	84	36
chr12	53769001	53770000	1000	*	7.44752e-05	0.0220341	-23.5251	Intron (XM_006515941.2/Npas3, intron 5 of 12)	12	53834936	53846520	11585	1	Gm35614	XR_381599.2	-64936	XM_006515941.2;XM_006515942.2;XM_006515943.2;NM_013780.2;XM_006515938.2;XM_006515939.2;XM_006515940.2	Npas3;Npas3;Npas3;Npas3;Npas3;Npas3;Npas3	0;0;0;0;0;0;0	96	49	47	37	27	10	32	27	5	6	5	1	18	16	2
chr12	54657001	54658000	1000	*	0.000209071	0.0423389	-22.7176	Promoter (<=1kb)	12	54645374	54656572	11199	2	Sptssa	NM_134054.2	-429	XR_872764.2;XR_872765.1;NM_134054.2	Gm40884;Gm40884;Sptssa	-737;-737;-429	32	22	10	77	34	43	56	51	5	6	5	1	103	65	38
chr12	54830001	54831000	1000	*	1.43965e-11	8.94195e-08	45.7823	Distal Intergenic	12	54858817	54862687	3871	2	Cfl2	XM_006515452.2	31687	NA	NA	NA	28	17	11	45	25	20	39	6	33	33	5	28	46	3	43
chr12	55396001	55397000	1000	*	2.49287e-11	1.44097e-07	-33.6714	Promoter (1-2kb)	12	55398825	55418459	19635	1	Psma6	NM_011968.3	-1825	NM_001310583.1;NM_011968.3	Psma6;Psma6	0;-1825	25	6	19	66	14	52	47	39	8	10	2	8	41	27	14
chr12	55517001	55518000	1000	*	4.06483e-06	0.00283245	42.4006	Distal Intergenic	12	55495074	55499711	4638	1	Gm36634	XR_872767.2	21927	NA	NA	NA	10	5	5	26	21	5	68	12	56	16	1	15	91	41	50
chr12	55946001	55947000	1000	*	1.59521e-05	0.00760346	-28.0449	Distal Intergenic	12	55836366	55869735	33370	1	Brms1l	NM_001037756.2	109635	NA	NA	NA	42	22	20	45	31	14	36	31	5	18	17	1	62	53	9
chr12	56682001	56683000	1000	*	8.54068e-10	3.18682e-06	48.5523	Downstream (1-2kb)	12	56691679	56712824	21146	1	Pax9	XM_006515581.3	-8679	XR_381621.2	Gm15524	8680	29	19	10	56	48	8	28	19	9	5	0	5	45	6	39
chr12	57777001	57778000	1000	*	1.96547e-05	0.00881188	-23.4649	Distal Intergenic	12	57673842	57737911	64070	1	Ttc6	XM_017315194.1	103159	NA	NA	NA	52	26	26	70	39	31	66	56	10	34	22	12	34	27	7
chr12	63911001	63912000	1000	*	0.00012734	0.031104	22.0149	Distal Intergenic	12	64399733	64402136	2404	2	Gm30915	XR_872786.1	490136	NA	NA	NA	32	30	2	41	39	2	34	26	8	39	36	3	33	16	17
chr12	64230001	64231000	1000	*	0.000267003	0.0491086	28.257	Distal Intergenic	12	64399733	64402136	2404	2	Gm30915	XR_872786.1	171136	NA	NA	NA	25	22	3	27	24	3	31	21	10	18	12	6	26	12	14
chr12	64627001	64628000	1000	*	0.000216545	0.0432398	33.3345	Distal Intergenic	12	64471333	64474898	3566	2	Fscb	NM_001163271.1	-152103	NA	NA	NA	5	2	3	18	17	1	5	0	5	13	9	4	37	12	25
chr12	64827001	64828000	1000	*	0.000187415	0.0396644	-32.3864	Distal Intergenic	12	64816653	64818608	1956	1	Gm4806	Gm4806	10348	NA	NA	NA	22	16	6	16	10	6	5	5	0	9	9	0	11	11	0
chr12	65035001	65036000	1000	*	2.5899e-10	1.11154e-06	45.0257	Promoter (<=1kb)	12	65036309	65055707	19399	1	Prpf39	XM_006516031.2	-309	XM_006516031.2;XM_006516026.3;XR_001780462.1;NM_177806.3	Prpf39;Prpf39;Prpf39;Prpf39	-309;-309;-309;-334	37	29	8	75	50	25	20	7	13	37	7	30	28	8	20
chr12	65225001	65226000	1000	*	0.000113287	0.0289107	40	Promoter (<=1kb)	12	65225517	65228454	2938	1	Wdr20rt	NM_027614.1	0	NM_027614.1	Wdr20rt	0	5	4	1	15	5	10	18	0	18	30	0	30	6	3	3
chr12	69169001	69170000	1000	*	1.41505e-09	4.94773e-06	-34.0681	Promoter (<=1kb)	12	69168814	69179010	10197	1	Lrr1	NM_001081406.1	187	XM_017315177.1;NM_001081406.1	Lrr1;Lrr1	0;0	81	3	78	64	14	50	54	26	28	33	14	19	10	5	5
chr12	69360001	69361000	1000	*	3.36198e-06	0.00245748	-47.4821	Promoter (<=1kb)	12	69361183	69361481	299	2	Rn7s2	NR_052008.1	481	NM_025441.3;XM_011244157.2;NR_052008.1	Nemf;Nemf;Rn7s2	-2825;-2826;481	31	10	21	20	7	13	5	4	1	18	15	3	15	12	3
chr12	70216001	70217000	1000	*	0.000167458	0.0369991	27.3261	Exon (NM_133198.2/Pygl, exon 4 of 20)	12	70190815	70227683	36869	2	Pygl	NM_133198.2	10683	NM_133198.2	Pygl	0	39	37	2	10	10	0	52	36	16	33	28	5	16	9	7
chr12	71418001	71419000	1000	*	0.000246451	0.0468527	28.8095	Distal Intergenic	12	71383154	71384208	1055	2	1700083H02Rik	NR_136902.1	-33793	NA	NA	NA	12	12	0	6	6	0	10	8	2	5	4	1	28	15	13
chr12	72235001	72236000	1000	*	1.20696e-11	7.68766e-08	-22.2052	Promoter (<=1kb)	12	72211749	72235746	23998	2	Rtn1	NR_104446.1	0	NR_104446.1;NM_001007596.2;NM_001286448.1;NM_153457.7;XM_006515324.1;XM_006515323.1	Rtn1;Rtn1;Rtn1;Rtn1;Rtn1;Rtn1	0;0;0;0;0;0	79	64	15	141	67	74	67	61	6	116	97	19	118	100	18
chr12	72301001	72302000	1000	*	4.86057e-05	0.0165386	-26	Intron (NM_001286448.1/Rtn1, intron 1 of 6)	12	72211749	72236727	24979	2	Rtn1	NM_001007596.2	-64274	NM_001286448.1;NM_153457.7;XM_006515324.1;XM_006515323.1	Rtn1;Rtn1;Rtn1;Rtn1	0;0;0;0	25	17	8	5	4	1	15	15	0	5	5	0	18	18	0
chr12	72660001	72661000	1000	*	3.00126e-07	0.000374988	62.4786	Intron (NM_025522.5/Dhrs7, intron 1 of 6)	12	72650353	72664828	14476	2	Dhrs7	NM_025522.5	3828	NM_025522.5	Dhrs7	0	5	5	0	18	16	2	6	1	5	26	5	21	10	6	4
chr12	72846001	72847000	1000	*	1.00098e-06	0.000967248	20.8443	Promoter (1-2kb)	12	72835935	72844522	8588	2	Gm40441	XR_872820.1	-1479	XR_872820.1	Gm40441	-1479	104	53	51	93	24	69	84	21	63	84	16	68	70	6	64
chr12	73012001	73013000	1000	*	6.68335e-06	0.00403416	-21.0406	Distal Intergenic	12	73041827	73046712	4886	2	Six1	NM_009189.3	33712	NA	NA	NA	91	57	34	54	35	19	73	60	13	61	55	6	72	59	13
chr12	73468001	73469000	1000	*	9.04199e-08	0.00014474	-24.3077	Intron (XR_381684.2/Gm34080, intron 2 of 3)	12	73450833	73503163	52331	1	Gm34080	XR_381684.2	17168	XR_381684.2	Gm34080	0	123	45	78	69	17	52	74	35	39	63	32	31	126	84	42
chr12	73516001	73517000	1000	*	5.66843e-05	0.0182794	-31.8915	Distal Intergenic	12	73489915	73509333	19419	2	Gm34016	XR_381683.2	-6668	NA	NA	NA	54	19	35	70	33	37	18	16	2	40	21	19	36	28	8
chr12	75362001	75363000	1000	*	7.47617e-05	0.0220791	-31.2785	Intron (NM_023275.2/Rhoj, intron 1 of 4)	12	75411720	75415817	4098	2	Gphb5	XM_017315024.1	52817	NM_023275.2	Rhoj	0	40	17	23	108	61	47	39	23	16	6	6	0	72	60	12
chr12	75853001	75854000	1000	*	0.00013996	0.0330719	-28.4488	Intron (NM_001005510.2/Syne2, intron 1 of 115)	12	75745779	75819628	73850	2	Gm40447	XM_011244246.1	-33373	NM_001005510.2	Syne2	0	22	10	12	5	3	2	25	22	3	37	34	3	11	7	4
chr12	76181001	76182000	1000	*	2.91153e-08	6.06568e-05	-53.4967	Distal Intergenic	12	76120419	76177259	56841	2	Esr2	NR_104386.1	-3742	NM_010157.3;NM_207707.1;NR_104386.1	Esr2;Esr2;Esr2	-3742;-3742;-3742	10	4	6	34	15	19	12	12	0	15	13	2	15	15	0
chr12	80158001	80159000	1000	*	3.49744e-05	0.0132479	41.5853	Distal Intergenic	12	80120546	80132844	12299	2	2310015A10Rik	NR_033514.1	-25157	NA	NA	NA	23	15	8	30	25	5	38	17	21	5	1	4	27	9	18
chr12	82157001	82158000	1000	*	2.64473e-05	0.0108658	-23.7834	Distal Intergenic	12	82169378	82451786	282409	1	Sipa1l1	XM_017315026.1	-11378	NA	NA	NA	35	21	14	61	22	39	61	40	21	17	13	4	94	69	25
chr12	82325001	82326000	1000	*	0.000151907	0.0347757	-20.4612	Intron (XM_017315026.1/Sipa1l1, intron 4 of 23)	12	82311349	82451786	140438	1	Sipa1l1	NM_172579.3	13652	XM_017315026.1;XM_011244060.2;XM_011244067.2;XM_011244068.2;XM_011244069.2;XM_011244061.2;XM_017315025.1;XM_017315027.1;XM_017315028.1;NM_001167983.1;XM_011244063.2;XM_011244064.2;XM_011244066.2;NM_172579.3	Sipa1l1;Sipa1l1;Sipa1l1;Sipa1l1;Sipa1l1;Sipa1l1;Sipa1l1;Sipa1l1;Sipa1l1;Sipa1l1;Sipa1l1;Sipa1l1;Sipa1l1;Sipa1l1	0;0;0;0;0;0;0;0;0;0;0;0;0;0	27	20	7	35	25	10	42	42	0	19	17	2	61	55	6
chr12	84434001	84435000	1000	*	0.00012708	0.031071	26.6525	Exon (NM_001313967.1/Aldh6a1, exon 10 of 12)	12	84430717	84448317	17601	2	Aldh6a1	NM_001313967.1	13317	NM_001313967.1;NM_134042.3;XM_017314928.1;XR_381550.2;XR_381548.2;XR_381549.2;XR_001780492.1;XR_001780493.1;XR_381551.3;XM_006516273.2;NM_028377.3	Aldh6a1;Aldh6a1;Aldh6a1;Bbof1;Bbof1;Bbof1;Bbof1;Bbof1;Bbof1;Bbof1;Bbof1	0;0;0;24953;24953;24953;24953;24953;24953;0;24933	35	31	4	7	7	0	44	21	23	16	16	0	29	16	13
chr12	84546001	84547000	1000	*	3.73391e-05	0.0138859	60	3' UTR	12	84569828	84595457	25630	1	Vsx2	NM_001301427.1	-22828	XM_006515701.3	Lin52	0	5	1	4	5	5	0	10	0	10	6	0	6	5	0	5
chr12	84667001	84668000	1000	*	1.75874e-08	4.08043e-05	-27.4038	Distal Intergenic	12	84642896	84651455	8560	1	Vrtn	NM_001033776.2	24105	NA	NA	NA	66	36	30	73	44	29	68	64	4	79	64	15	58	46	12
chr12	84922001	84923000	1000	*	4.16554e-06	0.00286488	-34.2913	Intron (XM_006516190.2/Arel1, intron 16 of 18)	12	84918148	84946923	28776	2	Arel1	XM_006516190.2	23923	XM_006516190.2;XM_006516189.3;XM_006516191.3;NM_178065.4;XR_872717.2	Arel1;Arel1;Arel1;Arel1;Arel1	0;0;0;0;0	10	8	2	31	15	16	5	5	0	10	10	0	22	21	1
chr12	84971001	84972000	1000	*	0.000153248	0.0349769	-26.9681	Promoter (<=1kb)	12	84970930	84983303	12374	1	Fcf1	NM_028632.2	71	XM_006516189.3;XM_006516191.3;NM_178065.4;XR_872717.2;NM_028632.2	Arel1;Arel1;Arel1;Arel1;Fcf1	0;0;0;0;0	80	27	53	26	8	18	43	25	18	32	22	10	63	32	31
chr12	85218001	85219000	1000	*	5.24438e-07	0.000580773	-40.0017	Promoter (<=1kb)	12	85219481	85226628	7148	1	Eif2b2	NM_145445.4	-481	NM_145445.4	Eif2b2	-481	29	18	11	31	8	23	10	7	3	11	10	1	33	30	3
chr12	85471001	85472000	1000	*	2.69e-06	0.00206288	-40.7885	Promoter (1-2kb)	12	85473901	85477269	3369	1	Fos	NM_010234.2	-1901	NM_010234.2	Fos	-1901	11	10	1	15	1	14	23	22	1	26	22	4	26	23	3
chr12	85485001	85486000	1000	*	8.49691e-05	0.0239446	-52.4823	Distal Intergenic	12	85473901	85477269	3369	1	Fos	NM_010234.2	11100	NA	NA	NA	10	0	10	5	1	4	47	27	20	10	9	1	15	6	9
chr12	86078001	86079000	1000	*	2.46514e-06	0.00193193	-22.4227	Promoter (<=1kb)	12	86056743	86079041	22299	2	Tgfb3	NM_009368.3	41	XM_006516359.2;NM_001199843.1;NM_029601.3;NM_009368.3	Ift43;Ift43;Ift43;Tgfb3	-3533;-3561;-3561;0	31	7	24	166	26	140	16	8	8	53	16	37	72	32	40
chr12	86836001	86837000	1000	*	4.25993e-05	0.0151705	25.6194	Promoter (2-3kb)	12	86831096	86833840	2745	2	Gm40491	XR_872891.2	-2161	XR_872891.2	Gm40491	-2161	21	21	0	20	0	20	98	15	83	87	10	77	41	19	22
chr12	87074001	87075000	1000	*	0.000203318	0.04174	51.7262	Intron (XM_017315036.1/Tmem63c, intron 14 of 24)	12	87061521	87091824	30304	1	Tmem63c	XM_006515727.3	12480	XM_017315036.1;XM_006515720.2;XR_001780445.1;XM_017315035.1;XM_006515716.3;XM_006515718.3;XM_011244081.2;XM_011244083.2;XM_011244084.2;XM_011244085.2;XM_011244086.2;XM_017315033.1;XM_017315034.1;XM_006515724.2;XM_006515725.2;NM_172583.2;XM_006515717.3;XM_011244082.2;XM_006515727.3	Tmem63c;Tmem63c;Tmem63c;Tmem63c;Tmem63c;Tmem63c;Tmem63c;Tmem63c;Tmem63c;Tmem63c;Tmem63c;Tmem63c;Tmem63c;Tmem63c;Tmem63c;Tmem63c;Tmem63c;Tmem63c;Tmem63c	0;0;0;0;0;0;0;0;0;0;0;0;0;0;0;0;0;0;0	16	10	6	15	14	1	14	5	9	6	0	6	14	6	8
chr12	87296001	87297000	1000	*	9.85713e-05	0.0263489	-21.9481	Promoter (2-3kb)	12	87278638	87299705	21068	2	Ism2	NM_001290302.1	2705	NM_001290302.1;XM_006516434.3;XM_011244091.2	Ism2;Ism2;Ism2	0;0;0	35	26	9	11	9	2	10	10	0	25	25	0	5	5	0
chr12	87305001	87306000	1000	*	5.07779e-06	0.00330155	-25.9422	3' UTR	12	87286304	87299724	13421	2	Ism2	XM_011244091.2	-5277	NM_011479.4	Sptlc2	0	34	9	25	16	16	0	49	42	7	11	9	2	12	12	0
chr12	90588001	90589000	1000	*	7.17885e-10	2.7296e-06	-32.7808	Distal Intergenic	12	90738212	90747166	8955	1	Gm26512	XR_872908.1	-149212	NA	NA	NA	61	6	55	29	4	25	20	8	12	69	19	50	80	53	27
chr12	90827001	90828000	1000	*	5.52365e-06	0.00351907	24.6405	Distal Intergenic	12	90724552	90739037	14486	2	Dio2	NM_010050.3	-87964	NA	NA	NA	28	28	0	41	41	0	10	8	2	34	27	7	6	4	2
chr12	91591001	91592000	1000	*	3.48094e-07	0.000420404	-30.4895	Promoter (<=1kb)	12	91555262	91590487	35226	2	Gtf2a1	NM_175335.3	-514	XM_017315260.1;NM_031391.2;NM_175335.3	Gtf2a1;Gtf2a1;Gtf2a1	-1407;-1352;-514	43	5	38	39	20	19	16	10	6	5	2	3	36	30	6
chr12	93550001	93551000	1000	*	7.00338e-05	0.0211645	23.2491	Distal Intergenic	12	93416457	93444823	28367	2	4930559C10Rik	NR_126436.1	-105178	NA	NA	NA	17	15	2	32	29	3	44	27	17	12	10	2	52	28	24
chr12	94638001	94639000	1000	*	4.87038e-05	0.0165515	37.271	Distal Intergenic	12	94914141	94916465	2325	2	Gm4808	Gm4808	277465	NA	NA	NA	11	11	0	11	11	0	9	5	4	10	8	2	19	10	9
chr12	96870001	96871000	1000	*	8.58397e-05	0.0240785	25.71	Distal Intergenic	12	96922294	96923058	765	2	Gm6863	Gm6863	52058	NA	NA	NA	21	17	4	74	70	4	14	9	5	5	3	2	21	13	8
chr12	98178001	98179000	1000	*	2.19384e-05	0.00953842	35.7148	Intron (LOC105245102/LOC105245102, intron 1 of 2)	12	98097012	98196417	99406	2	LOC105245102	LOC105245102	17417	LOC105245102	LOC105245102	0	30	27	3	35	27	8	29	14	15	17	6	11	20	12	8
chr12	101146001	101147000	1000	*	7.16868e-08	0.000121723	52.6472	Promoter (<=1kb)	12	101145609	101149273	3665	1	Kif4-ps	NR_033653.1	392	NR_033653.1	Kif4-ps	0	31	29	2	10	10	0	21	11	10	10	0	10	5	4	1
chr12	102470001	102471000	1000	*	4.8552e-05	0.016537	58.5628	Promoter (<=1kb)	12	102470170	102497911	27742	1	Golga5	XM_006515935.3	0	XR_381856.1;XR_381855.2;XR_872944.1;NM_001199004.1;NM_013747.4;XM_006515935.3	Gm30198;Gm30198;Gm30198;Golga5;Golga5;Golga5	22673;22587;18268;0;0;0	7	7	0	11	10	1	10	0	10	17	10	7	27	14	13
chr12	103059001	103060000	1000	*	2.1682e-06	0.00175848	36.6206	Exon (XM_006515753.3/Unc79, exon 12 of 52)	12	103070191	103184228	114038	1	Unc79	XM_017315040.1	-10191	XM_006515753.3;NM_001081017.2;XM_006515747.3;XM_006515743.2;XM_006515745.3;XM_006515744.2;XM_006515746.2;XM_006515748.2;XM_006515749.2;XM_006515750.2;XM_006515751.2;XM_006515752.2;XM_017315037.1;XM_017315038.1;XM_017315039.1;XM_006515756.1	Unc79;Unc79;Unc79;Unc79;Unc79;Unc79;Unc79;Unc79;Unc79;Unc79;Unc79;Unc79;Unc79;Unc79;Unc79;Unc79	0;0;0;0;0;0;0;0;0;0;0;0;0;0;0;0	31	23	8	19	19	0	5	2	3	5	4	1	35	11	24
chr12	104583001	104584000	1000	*	0.000111136	0.0285183	-21.9722	Distal Intergenic	12	104661424	104662697	1274	2	Gm31573	XR_381875.2	78697	NA	NA	NA	71	51	20	75	33	42	83	60	23	26	22	4	58	48	10
chr12	104852001	104853000	1000	*	5.24214e-08	9.58343e-05	-28.5335	Intron (NM_001040682.1/Clmn, intron 1 of 12)	12	104773805	104865029	91225	2	Clmn	XR_001780506.1	12029	NM_001040682.1;NM_053155.2;NR_104435.1;NR_104436.1;NR_104437.1;NR_104438.1;NR_104439.1;XR_001780506.1	Clmn;Clmn;Clmn;Clmn;Clmn;Clmn;Clmn;Clmn	0;0;0;0;0;0;0;0	9	9	0	82	31	51	7	7	0	8	8	0	13	12	1
chr12	106395001	106396000	1000	*	5.28236e-05	0.0174913	63.6275	Distal Intergenic	12	106408442	106412733	4292	1	Gm32830	XR_381897.2	-12442	NA	NA	NA	10	9	1	17	12	5	5	0	5	6	1	5	9	3	6
chr12	106681001	106682000	1000	*	2.4733e-08	5.37675e-05	41.9207	Distal Intergenic	12	106685607	106716324	30718	2	4933406K04Rik	NR_015512.2	34324	NR_015512.2	4933406K04Rik	34324	17	14	3	89	42	47	76	7	69	33	4	29	36	17	19
chr12	107220001	107221000	1000	*	2.67628e-05	0.0109594	-27.7175	Distal Intergenic	12	107111059	107112147	1089	2	LOC108167964	XM_017315293.1	-107854	NA	NA	NA	33	23	10	37	26	11	29	27	2	12	12	0	17	17	0
chr12	107876001	107877000	1000	*	2.07043e-05	0.00916883	23.5679	Distal Intergenic	12	107824390	107825701	1312	1	Gm33341	XR_381909.1	51611	NA	NA	NA	5	3	2	42	37	5	30	13	17	31	20	11	39	17	22
chr12	108424001	108425000	1000	*	1.92572e-06	0.00160611	-58.3752	Promoter (<=1kb)	12	108424042	108539576	115535	1	Eml1	XM_017315171.1	0	XM_017315168.1;NM_001286346.1;NM_001043336.2;NM_001286347.1;XM_017315172.1;XM_017315169.1;NM_001043335.1;XM_017315170.1;XM_017315171.1	Eml1;Eml1;Eml1;Eml1;Eml1;Eml1;Eml1;Eml1;Eml1	0;0;0;0;0;0;0;0;0	13	2	11	5	2	3	37	31	6	8	8	0	43	32	11
chr12	108515001	108516000	1000	*	8.12293e-07	0.000828026	40.9233	Exon (XM_017315168.1/Eml1, exon 15 of 25)	12	108554720	108688516	133797	1	Evl	NM_001163394.1	-38720	XM_017315168.1;NM_001286346.1;NM_001043336.2;NM_001286347.1;XM_017315172.1;XM_017315169.1;NM_001043335.1;XM_017315170.1;XM_017315171.1	Eml1;Eml1;Eml1;Eml1;Eml1;Eml1;Eml1;Eml1;Eml1	0;0;0;0;0;0;0;0;0	72	30	42	39	27	12	41	8	33	17	1	16	11	2	9
chr12	108554001	108555000	1000	*	3.29818e-18	5.59014e-14	27.5074	Promoter (<=1kb)	12	108554720	108688516	133797	1	Evl	NM_001163394.1	0	NM_001163394.1;NM_007965.3;NR_045751.1;NR_045752.1;NR_045753.1	Evl;Evl;Gm16596;Gm16596;Gm16596	0;0;0;0;0	192	123	69	5	0	5	30	3	27	10	0	10	28	1	27
chr12	108555001	108556000	1000	*	3.21827e-30	1.2378e-25	21.8423	Promoter (<=1kb)	12	108536402	108555618	19217	2	Gm16596	NR_045751.1	0	NM_001163394.1;NM_007965.3;NR_045751.1;NR_045752.1;NR_045753.1	Evl;Evl;Gm16596;Gm16596;Gm16596	0;0;0;0;0	347	147	200	120	5	115	73	0	73	68	1	67	143	4	139
chr12	111166001	111167000	1000	*	2.32503e-07	0.000305522	24.055	Promoter (<=1kb)	12	111166370	111267155	100786	1	Traf3	NM_001286122.1	0	NR_130987.1;NM_001286122.1;NM_011632.3;XM_006515802.2;XM_017315042.1;XM_006515798.2;XM_006515800.2;XM_006515801.2;XM_006515799.1	4930595D18Rik;Traf3;Traf3;Traf3;Traf3;Traf3;Traf3;Traf3;Traf3	0;0;0;0;0;0;0;0;0	75	64	11	142	107	35	50	24	26	192	110	82	140	89	51
chr12	111496001	111497000	1000	*	2.7379e-05	0.0111387	20.7171	Promoter (2-3kb)	12	111492424	111499453	7030	2	Gm40578	XR_001780718.1	2453	XR_001780718.1;XR_001780709.1;XR_001780710.1;XR_001780711.1;XR_001780712.1;XR_001780713.1;XR_001780714.1;XR_001780716.1;XR_873039.2;XR_873040.2;XR_873041.2;XR_001780719.1;XR_001780715.1;XR_001780717.1	Gm40578;Gm40578;Gm40578;Gm40578;Gm40578;Gm40578;Gm40578;Gm40578;Gm40578;Gm40578;Gm40578;Gm40578;Gm40578;Gm40578	0;0;0;0;0;0;0;0;0;0;0;0;0;0	61	32	29	80	41	39	74	9	65	80	25	55	56	28	28
chr12	111730001	111731000	1000	*	4.52337e-07	0.000515778	-26.3226	Exon (NM_026511.2/Apopt1, exon 4 of 5)	12	111709844	111713317	3474	2	Bag5	XM_017315180.1	-16684	NM_026511.2;NM_001163388.1;XM_006516178.3;XM_006516179.3	Apopt1;Apopt1;Apopt1;Apopt1	0;0;0;0	56	32	24	96	80	16	46	44	2	11	11	0	67	63	4
chr12	111769001	111770000	1000	*	6.56127e-05	0.0202259	-20.4326	Intron (NM_008450.2/Klc1, intron 1 of 13)	12	111758874	111806714	47841	1	Klc1	XR_001780417.1	10127	NM_008450.2;NM_001025360.2;NM_001081959.1;NM_001025358.2;NM_001025359.2;NM_001025363.2;XM_006515494.2;NM_001025361.2;NM_001025362.2;XM_017314965.1;XM_006515495.2;XM_006515498.2;XM_006515499.2;XR_001780416.1;XM_011244001.2;XM_006515492.2;XM_017314963.1;XM_017314964.1;XR_001780413.1;XR_001780414.1;XR_001780415.1;XR_001780417.1	Klc1;Klc1;Klc1;Klc1;Klc1;Klc1;Klc1;Klc1;Klc1;Klc1;Klc1;Klc1;Klc1;Klc1;Klc1;Klc1;Klc1;Klc1;Klc1;Klc1;Klc1;Klc1	0;0;0;0;0;0;0;0;0;0;0;0;0;0;0;0;0;0;0;0;0;0	23	16	7	52	35	17	28	26	2	5	4	1	48	45	3
chr12	112542001	112543000	1000	*	0.000149075	0.0344762	36.4114	Distal Intergenic	12	112535662	112536991	1330	1	Gm40584	XR_873065.1	6339	NA	NA	NA	18	16	2	10	8	2	15	4	11	20	17	3	37	12	25
chr12	112830001	112831000	1000	*	3.71306e-07	0.000441506	-23.7536	Promoter (<=1kb)	12	112820229	112829516	9288	2	Cdca4	XM_006516244.1	-485	XM_006516244.1;NM_028023.3	Cdca4;Cdca4	-485;-612	133	62	71	106	62	44	50	43	7	89	56	33	85	68	17
chr12	113042001	113043000	1000	*	1.75414e-05	0.00815498	31.3445	Intron (XM_006515779.2/Pacs2, intron 1 of 14)	12	113014534	113074393	59860	1	Pacs2	XM_006515778.1	27467	XM_006515779.2;XR_001780448.1;XM_006515769.2;XM_006515770.2;XM_006515771.2;XM_006515772.2;XM_006515773.2;XM_006515774.2;XM_006515777.2;XR_381518.2;XR_381519.3;NM_001081170.1;NM_001291444.1;NM_001291445.1;XM_006515778.1	Pacs2;Pacs2;Pacs2;Pacs2;Pacs2;Pacs2;Pacs2;Pacs2;Pacs2;Pacs2;Pacs2;Pacs2;Pacs2;Pacs2;Pacs2	0;0;0;0;0;0;0;0;0;0;0;0;0;0;0	21	20	1	34	34	0	6	6	0	5	2	3	17	10	7
chr12	116282001	116283000	1000	*	2.22109e-07	0.000294184	-32.8686	Promoter (<=1kb)	12	116281222	116373098	91877	1	Esyt2	NM_028731.5	779	XM_017315128.1;XR_001780464.1;XR_001780465.1;XM_006516075.3;XM_006516072.3;XM_017315130.1;XR_001780466.1;XR_001780467.1;XM_011244139.2;XM_017315129.1;NM_028731.5	Esyt2;Esyt2;Esyt2;Esyt2;Esyt2;Esyt2;Esyt2;Esyt2;Esyt2;Esyt2;Esyt2	0;0;0;0;0;0;0;0;0;0;0	65	34	31	70	35	35	26	24	2	32	27	5	65	49	16
chr12	117607001	117608000	1000	*	2.02127e-05	0.00900342	-26.1796	Intron (NM_175930.5/Rapgef5, intron 8 of 27)	12	117533856	117759737	225882	1	Rapgef5	XM_006515781.3	73145	NM_175930.5;XM_006515781.3	Rapgef5;Rapgef5	0;0	25	14	11	57	50	7	68	64	4	5	5	0	50	50	0
chr12	117861001	117862000	1000	*	1.30507e-07	0.000192489	20.52	Intron (XM_006515784.3/Cdca7l, intron 1 of 9)	12	117851768	117878712	26945	1	Cdca7l	XM_011244099.2	9233	XM_006515784.3;XM_006515786.3;NM_146040.1;XM_011244100.2;XM_011244098.2;XM_011244099.2	Cdca7l;Cdca7l;Cdca7l;Cdca7l;Cdca7l;Cdca7l	0;0;0;0;0;0	91	89	2	96	90	6	131	110	21	27	19	8	63	45	18
chr12	117982001	117983000	1000	*	1.92481e-05	0.00870484	22.3514	Exon (NM_010060.3/Dnah11, exon 57 of 82)	12	117877988	117989132	111145	2	Dnah11	XM_006515466.3	6132	NM_010060.3;XM_006515466.3;XM_006515464.3;XM_006515463.3;XM_017314948.1;XM_017314947.1;XM_017314946.1;XM_017314949.1	Dnah11;Dnah11;Dnah11;Dnah11;Dnah11;Dnah11;Dnah11;Dnah11	0;0;0;0;0;0;0;0	33	28	5	88	75	13	99	66	33	55	34	21	47	28	19
chr12	119852001	119853000	1000	*	5.75228e-06	0.00362463	28.2633	Distal Intergenic	12	119945684	120021246	75563	1	Tmem196	XM_006515787.3	-92684	NA	NA	NA	30	29	1	19	19	0	35	22	13	17	14	3	20	13	7
chr12	119995001	119996000	1000	*	7.86747e-05	0.0227977	-22.0646	Intron (XM_006515787.3/Tmem196, intron 1 of 4)	12	119945962	120021245	75284	1	Tmem196	NM_001294154.1	49039	XM_006515787.3;NM_001160385.2;NM_001294146.1;NM_001294154.1	Tmem196;Tmem196;Tmem196;Tmem196	0;0;0;0	41	32	9	32	22	10	40	38	2	21	20	1	26	25	1
chr13	4608001	4609000	1000	*	2.00591e-06	0.00166327	-42.4638	Promoter (<=1kb)	13	4592490	4609134	16645	2	Akr1e1	XM_006516485.1	134	XM_006516485.1;NM_018859.2	Akr1e1;Akr1e1	0;0	16	0	16	27	0	27	10	1	9	23	4	19	9	9	0
chr13	5346001	5347000	1000	*	2.47846e-05	0.0103832	23.4184	Distal Intergenic	13	5258802	5266034	7233	1	Gm40659	XR_873108.1	87199	NA	NA	NA	74	71	3	52	51	1	10	10	0	14	8	6	11	7	4
chr13	7762001	7763000	1000	*	9.15063e-05	0.0252182	52.8322	Distal Intergenic	13	7507318	7510231	2914	1	Gm36136	XR_382037.2	254683	NA	NA	NA	15	12	3	9	9	0	17	8	9	9	4	5	10	2	8
chr13	7990001	7991000	1000	*	0.000150829	0.0346813	37.037	Distal Intergenic	13	8128050	8130854	2805	1	Gm5191	Gm5191	-137050	NA	NA	NA	18	18	0	8	8	0	18	13	5	6	6	0	6	1	5
chr13	8399001	8400000	1000	*	1.56508e-06	0.0013615	-29.54	Intron (XM_017315647.1/Adarb2, intron 1 of 10)	13	8202866	8768762	565897	1	Adarb2	NR_110345.1	196135	XM_017315647.1;XR_382016.3;NM_001289530.1;NM_052977.5;NR_110345.1	Adarb2;Adarb2;Adarb2;Adarb2;Adarb2	0;0;0;0;0	36	18	18	95	39	56	61	45	16	7	5	2	25	20	5
chr13	8886001	8887000	1000	*	0.000234834	0.0454665	-21.688	Promoter (<=1kb)	13	8885606	8892396	6791	1	Idi1	NM_145360.2	395	NM_145360.2	Idi1	0	79	0	79	20	5	15	21	0	21	12	10	2	26	5	21
chr13	12026001	12027000	1000	*	0.000102502	0.027024	28.2482	Intron (XM_006516610.1/Ryr2, intron 1 of 106)	13	11553099	12106940	553842	2	Ryr2	XM_006516610.1	79940	XM_006516610.1;XM_011244296.1;XM_017315445.1;XM_017315446.1;XM_017315447.1;XM_017315448.1;XM_017315449.1;XM_017315450.1;XM_017315451.1;XM_017315452.1;XM_017315453.1;XM_017315454.1;XM_017315455.1;XM_017315460.1;XM_017315461.1;NM_023868.2;XM_017315456.1;XM_017315458.1;XM_017315457.1;XM_017315459.1	Ryr2;Ryr2;Ryr2;Ryr2;Ryr2;Ryr2;Ryr2;Ryr2;Ryr2;Ryr2;Ryr2;Ryr2;Ryr2;Ryr2;Ryr2;Ryr2;Ryr2;Ryr2;Ryr2;Ryr2	0;0;0;0;0;0;0;0;0;0;0;0;0;0;0;0;0;0;0;0	7	7	0	31	30	1	16	11	5	5	5	0	12	5	7
chr13	12349001	12350000	1000	*	7.38643e-05	0.0219056	-22.9239	Distal Intergenic	13	12269426	12340732	71307	2	Actn2	NM_033268.4	-8269	NA	NA	NA	57	14	43	124	27	97	99	42	57	65	17	48	33	23	10
chr13	12462001	12463000	1000	*	0.00010168	0.0268852	-20.4668	Promoter (<=1kb)	13	12439415	12461738	22324	2	Lgals8	NM_018886.5	-263	NM_001291055.1;NM_001291057.1;NM_001291060.1;NM_001199043.1;NM_018886.5;XM_006516714.2;XM_006516715.2;XM_011244320.1;XM_011244321.1;XM_011244323.1;XM_011244324.1;XM_011244325.1;XM_017315547.1;XM_017315548.1;XM_017315549.1;XM_011244322.2	Lgals8;Lgals8;Lgals8;Lgals8;Lgals8;Lgals8;Lgals8;Lgals8;Lgals8;Lgals8;Lgals8;Lgals8;Lgals8;Lgals8;Lgals8;Lgals8	-2685;-263;-263;-263;-263;0;0;0;0;0;0;0;0;0;0;0	89	18	71	62	14	48	63	25	38	54	14	40	50	30	20
chr13	13592001	13593000	1000	*	5.27767e-05	0.0174913	-24.3067	Promoter (<=1kb)	13	13589603	13591868	2266	2	Gm30836	XR_873144.2	-133	XR_382086.3;XR_873144.2;XM_006516563.3;XM_006516561.1;XM_006516562.1;NM_010748.2	Gm30836;Gm30836;Lyst;Lyst;Lyst;Lyst	-133;-133;0;0;0;0	56	37	19	40	27	13	40	35	5	31	28	3	22	21	1
chr13	13919001	13920000	1000	*	5.84373e-05	0.0186225	-37.4525	Distal Intergenic	13	13954474	13994470	39997	1	B3galnt2	XR_873137.1	-34474	NA	NA	NA	13	5	8	24	15	9	45	38	7	28	27	1	41	34	7
chr13	16764001	16765000	1000	*	0.00023987	0.0460491	26.6496	Distal Intergenic	13	16637881	16639529	1649	2	Gm7537	Gm7537	-124472	NA	NA	NA	69	52	17	71	58	13	30	12	18	22	10	12	57	40	17
chr13	17992001	17993000	1000	*	0.000111371	0.0285568	-26.9188	Promoter (<=1kb)	13	17986640	17993351	6712	2	Yae1d1	NM_025904.3	351	NM_025904.3	Yae1d1	0	70	12	58	21	14	7	17	13	4	5	4	1	30	15	15
chr13	18055001	18056000	1000	*	8.77714e-05	0.0244761	-29.3277	Distal Intergenic	13	18038600	18039456	857	1	Gm6575	Gm6575	16401	NA	NA	NA	11	8	3	43	22	21	44	36	8	5	5	0	25	23	2
chr13	18219001	18220000	1000	*	7.79566e-06	0.00450877	-41.5989	Intron (NM_175006.2/Pou6f2, intron 4 of 8)	13	18281144	18284357	3214	1	Gm31832	XR_001780864.1	-61144	NM_175006.2	Pou6f2	0	68	29	39	5	1	4	62	50	12	52	29	23	34	28	6
chr13	18269001	18270000	1000	*	7.2877e-06	0.0042894	-22.662	Intron (NM_175006.2/Pou6f2, intron 3 of 8)	13	18281144	18284357	3214	1	Gm31832	XR_001780864.1	-11144	NM_175006.2	Pou6f2	0	27	16	11	15	14	1	26	26	0	14	14	0	32	31	1
chr13	19476001	19477000	1000	*	0.00026848	0.0492354	-30.0903	Intron (NR_131038.1/9330199G10Rik, intron 3 of 3)	13	19462847	19504367	41521	2	9330199G10Rik	NR_131038.1	27367	NR_131038.1;NR_131037.1	9330199G10Rik;9330199G10Rik	0;0	23	9	14	22	16	6	23	18	5	16	15	1	43	37	6
chr13	22016001	22017000	1000	*	9.45364e-05	0.0257873	-29.0073	Promoter (<=1kb)	13	22015791	22015863	73	2	n-TVaac3	rna77561	-138	rna77562;rna77561	n-TRacg1;n-TVaac3	4216;-138	23	4	19	48	21	27	56	39	17	11	1	10	14	14	0
chr13	22032001	22033000	1000	*	7.14986e-05	0.0214582	-26.832	Promoter (1-2kb)	13	22030100	22030173	74	2	n-TTagt1	rna77566	-1828	NM_175659.2;NM_175665.2;rna77565;rna77566	Hist1h2ah;Hist1h2bk;n-TIaat7;n-TTagt1	2643;-2821;2778;-1828	90	24	66	69	29	40	138	50	88	30	24	6	104	70	34
chr13	23397001	23398000	1000	*	2.28952e-07	0.000302048	-34.8773	Promoter (<=1kb)	13	23397060	23397133	74	1	n-TIaat3	rna77632	0	rna77633;rna77632;rna77634	n-TAagc12;n-TIaat3;n-TVaac2	2867;0;3145	77	25	52	112	32	80	35	22	13	15	14	1	5	2	3
chr13	23750001	23751000	1000	*	8.75541e-05	0.0244292	-22.1381	Promoter (<=1kb)	13	23751088	23751592	505	1	Hist1h2ab	NM_175660.3	-88	NM_175660.3;NM_175664.3;NM_178203.2;NM_175653.2	Hist1h2ab;Hist1h2bb;Hist1h3b;Hist1h3c	-88;3267;-1380;-4480	24	1	23	62	9	53	81	32	49	47	13	34	33	9	24
chr13	24802001	24803000	1000	*	5.95441e-05	0.0188849	-41.3968	Promoter (<=1kb)	13	24801657	24812899	11243	1	BC005537	NM_024473.3	344	NM_024473.3	BC005537	0	46	7	39	46	3	43	13	6	7	5	4	1	62	19	43
chr13	25751001	25752000	1000	*	8.64571e-07	0.000868043	-32.197	Distal Intergenic	13	25582119	25583465	1347	2	Gm11349	Gm11349	-167536	NA	NA	NA	6	5	1	44	23	21	10	10	0	6	6	0	12	12	0
chr13	27202001	27203000	1000	*	0.000228339	0.0446413	28.8949	Exon (NM_013766.2/Prl3c1, exon 4 of 5)	13	27198903	27203749	4847	1	Prl3c1	NM_001163218.1	3098	NM_013766.2;NM_001163218.1	Prl3c1;Prl3c1	0;0	37	34	3	11	10	1	47	27	20	11	5	6	26	22	4
chr13	27622001	27623000	1000	*	0.000158031	0.035697	33.3333	Distal Intergenic	13	27601819	27610582	8764	2	Prl7b1	NM_029355.2	-11419	NA	NA	NA	14	14	0	11	11	0	21	14	7	5	3	2	15	11	4
chr13	28165001	28166000	1000	*	1.0375e-05	0.0055559	23.4127	Distal Intergenic	13	28142484	28151595	9112	1	Prl5a1	NM_023746.4	22517	NA	NA	NA	19	19	0	15	15	0	28	13	15	10	9	1	15	14	1
chr13	28197001	28198000	1000	*	0.000262844	0.0486434	23.8072	Distal Intergenic	13	28142484	28151595	9112	1	Prl5a1	NM_023746.4	54517	NA	NA	NA	26	24	2	18	18	0	55	39	16	21	11	10	16	15	1
chr13	28257001	28258000	1000	*	0.000264567	0.0488582	33.2366	Promoter (<=1kb)	13	28257615	28258138	524	1	Gm11361	Gm11361	0	Gm11361	Gm11361	0	9	9	0	91	45	46	107	30	77	28	5	23	14	11	3
chr13	28883001	28884000	1000	*	1.80637e-09	6.10262e-06	-21.738	Promoter (1-2kb)	13	28460034	28885422	425389	2	2610307P16Rik	NR_045053.1	1422	NR_045053.1;NR_045054.1	2610307P16Rik;2610307P16Rik	0;0	10	7	3	67	32	35	64	62	2	21	12	9	74	65	9
chr13	28909001	28910000	1000	*	4.62817e-23	1.18671e-18	45.5399	Promoter (<=1kb)	13	28905604	28909600	3997	2	Gm34697	XR_382149.2	0	XR_382149.2;XR_873193.1	Gm34697;Gm40858	0;6770	20	13	7	139	102	37	10	1	9	119	17	102	15	7	8
chr13	30042001	30043000	1000	*	3.5613e-06	0.00256763	-20.8681	Distal Intergenic	13	30003375	30035446	32072	1	Gm40860	XR_873196.1	38626	NA	NA	NA	79	58	21	95	56	39	40	36	4	67	55	12	64	57	7
chr13	30382001	30383000	1000	*	2.67314e-06	0.00205473	-33.5916	3' UTR	13	30344899	30382867	37969	1	Agtr1a	XM_011244264.2	37102	NM_177322.3;XM_006516534.1;XM_011244264.2	Agtr1a;Agtr1a;Agtr1a	0;0;0	34	25	9	33	17	16	29	27	2	21	20	1	11	11	0
chr13	31503001	31504000	1000	*	7.69023e-10	2.88024e-06	-31.8219	Distal Intergenic	13	31558170	31560976	2807	1	Foxq1	NM_008239.4	-54170	NA	NA	NA	119	56	63	97	40	57	53	47	6	57	42	15	119	78	41
chr13	32442001	32443000	1000	*	2.43226e-05	0.0102411	23.6471	Distal Intergenic	13	32465453	32493376	27924	1	Gm40876	XR_873209.1	-22453	NA	NA	NA	5	4	1	48	46	2	29	17	12	26	19	7	18	11	7
chr13	33224001	33225000	1000	*	4.87276e-05	0.0165515	20.4067	Distal Intergenic	13	33249610	33260846	11237	1	Serpinb9e	NM_011456.2	-24610	NA	NA	NA	51	46	5	54	38	16	27	8	19	5	4	1	10	7	3
chr13	34662001	34663000	1000	*	0.000149424	0.034533	-31.3248	Intron (NR_105041.1/Gm15908, intron 3 of 3)	13	34628799	34653133	24335	2	Pxdc1	XR_382069.2	-8868	NR_105041.1	Gm15908	0	27	19	8	5	3	2	13	12	1	13	13	0	36	35	1
chr13	34747001	34748000	1000	*	1.21775e-13	1.18228e-09	-29.1839	3' UTR	13	34739642	34747622	7981	1	Fam50b	NM_138746.2	7359	XM_006516526.1;NM_138746.2	Fam50b;Fam50b	0;0	52	15	37	282	59	223	19	4	15	83	36	47	45	44	1
chr13	35717001	35718000	1000	*	0.000208824	0.0423389	22.4809	Intron (XR_382045.3/Cdyl, intron 3 of 8)	13	35741307	35874064	132758	1	Cdyl	XM_006516536.2	-23307	XR_382045.3;NM_009881.3	Cdyl;Cdyl	0;0	138	103	35	50	36	14	53	18	35	63	28	35	112	83	29
chr13	38035001	38036000	1000	*	0.00027422	0.0498401	25.3157	Promoter (<=1kb)	13	38006052	38036937	30886	2	Cage1	NM_027724.2	937	NM_027724.2;XM_006516776.3;XM_006516779.3;XM_017315602.1;XM_017315603.1;XM_017315604.1;XM_017315605.1;XM_011244349.2;XR_001780816.1;NM_024242.3;XM_017315606.1;XR_001780817.1;XR_382077.2	Cage1;Cage1;Cage1;Cage1;Cage1;Cage1;Cage1;Cage1;Cage1;Riok1;Riok1;Riok1;Riok1	0;0;0;0;0;0;0;0;0;-989;-1240;-1241;-1241	29	25	4	16	13	3	5	4	1	21	6	15	12	8	4
chr13	38634001	38635000	1000	*	0.000135411	0.0323639	-25.2714	Promoter (<=1kb)	13	38602706	38635109	32404	2	Bloc1s5	NM_139063.1	109	NM_139063.1;XM_006516573.3	Bloc1s5;Bloc1s5	0;0	39	2	37	63	4	59	22	8	14	5	2	3	6	1	5
chr13	38906001	38907000	1000	*	0.000240117	0.0460612	-30.5587	Exon (XR_001780837.1/LOC108168052, exon 7 of 7)	13	38861730	38908237	46508	1	LOC108168052	XR_001780837.1	44271	XR_001780837.1	LOC108168052	0	46	13	33	54	4	50	100	30	70	48	9	39	28	27	1
chr13	39068001	39069000	1000	*	0.000136141	0.0324919	23.0848	Distal Intergenic	13	38932305	38960875	28571	2	Slc35b3	XR_001780746.1	-107126	NA	NA	NA	23	23	0	20	19	1	12	7	5	26	26	0	57	37	20
chr13	39624001	39625000	1000	*	3.24371e-05	0.0125676	24.4048	Intron (XR_382222.2/Gm32243, intron 2 of 2)	13	39617315	39647352	30038	2	Gm32243	XR_382222.2	22352	XR_382222.2	Gm32243	0	16	16	0	23	23	0	14	9	5	15	15	0	24	15	9
chr13	39774001	39775000	1000	*	2.75994e-08	5.87221e-05	-33.6421	Intron (XR_873274.1/Gm40923, intron 1 of 2)	13	39771790	39791384	19595	2	Gm40923	XR_873274.1	16384	XR_873274.1	Gm40923	0	31	12	19	98	13	85	10	7	3	15	8	7	54	30	24
chr13	39907001	39908000	1000	*	0.000118986	0.0297167	-24.0583	Distal Intergenic	13	39912866	39923211	10346	2	Gm40924	XR_873275.1	15211	XR_873275.1	Gm40924	15211	10	7	3	31	21	10	6	5	1	22	21	1	27	27	0
chr13	40860001	40861000	1000	*	1.39668e-06	0.00124927	-26.5208	Promoter (<=1kb)	13	40859768	40960892	101125	1	Gcnt2	NM_023887.4	233	NM_023887.4;NR_039585.1;NA	Gcnt2;Mir5124a;Mir5124a	0;-4791;-4801	46	24	22	63	52	11	64	58	6	43	42	1	15	14	1
chr13	41221001	41222000	1000	*	4.18216e-05	0.014967	47.9677	Promoter (<=1kb)	13	41182382	41220403	38022	2	Elovl2	NM_019423.2	-598	NM_001311121.1;NM_019423.2	Elovl2;Elovl2	-839;-598	5	5	0	20	13	7	43	9	34	25	4	21	12	8	4
chr13	41848001	41849000	1000	*	1.17462e-05	0.00608294	48.2178	Promoter (<=1kb)	13	41763148	41847616	84469	2	Adtrp	NM_001145875.1	-385	NM_175417.4;NM_001145875.1	Adtrp;Adtrp	-513;-385	6	6	0	66	42	24	12	8	4	26	4	22	16	3	13
chr13	41885001	41886000	1000	*	3.87426e-06	0.00274187	21.1463	Exon (NR_033545.1/Gm10790, exon 3 of 7)	13	41865915	41913092	47178	1	Gm10790	NR_033545.1	19086	NR_033545.1	Gm10790	0	31	31	0	26	26	0	15	11	4	23	20	3	59	45	14
chr13	42184001	42185000	1000	*	9.7599e-11	4.80783e-07	-62.4209	Promoter (1-2kb)	13	42186725	42195210	8486	1	Gm32778	XR_001780923.1	-1725	XR_001780923.1;XR_382263.2;XM_006516839.3;NM_007772.2;XM_017315359.1;XM_006516840.3;XM_017315358.1;XM_006516838.3;XM_017315360.1	Gm32778;Gm32778;Hivep1;Hivep1;Hivep1;Hivep1;Hivep1;Hivep1;Hivep1	-1725;-1725;0;0;0;0;0;0;0	24	8	16	25	7	18	7	6	1	5	5	0	31	29	2
chr13	42333001	42334000	1000	*	8.35168e-07	0.000844041	21.1192	Distal Intergenic	13	42301476	42307990	6515	1	Edn1	NM_010104.4	31525	NA	NA	NA	38	38	0	64	59	5	41	26	15	17	16	1	46	31	15
chr13	42867001	42868000	1000	*	2.89881e-07	0.000364172	-46.701	Promoter (<=1kb)	13	42866726	43138390	271665	1	Phactr1	XM_006516911.3	275	XM_011244395.2;NM_001302635.1;XM_017315482.1;XM_006516905.3;XM_017315483.1;XM_006516906.3;NM_001005740.1;NM_001302636.1;XM_006516911.3	Phactr1;Phactr1;Phactr1;Phactr1;Phactr1;Phactr1;Phactr1;Phactr1;Phactr1	0;0;0;0;0;0;0;0;0	36	19	17	53	10	43	7	7	0	11	9	2	73	48	25
chr13	43182001	43183000	1000	*	3.0432e-05	0.0120285	-31.4872	Intron (XR_873309.2/Gm40929, intron 3 of 3)	13	43171946	43192505	20560	1	Gm40929	XR_873308.1	10055	XR_873309.2;XR_873308.1	Gm40929;Gm40929	0;0	21	13	8	36	26	10	23	22	1	7	7	0	15	15	0
chr13	43696001	43697000	1000	*	0.000139127	0.032914	-20.0145	Distal Intergenic	13	43716791	43719038	2248	1	Gm20751	NR_046022.1	-19791	NA	NA	NA	48	8	40	28	9	19	56	18	38	11	5	6	106	59	47
chr13	43959001	43960000	1000	*	0.000135837	0.0324348	-28.8031	Distal Intergenic	13	43948876	43952699	3824	1	Gm2233	XR_382279.3	10125	NA	NA	NA	5	3	2	16	9	7	33	33	0	17	16	1	6	4	2
chr13	44216001	44217000	1000	*	3.81766e-07	0.000450195	-42.1027	Promoter (<=1kb)	13	44193589	44216487	22899	2	A330076C08Rik	NR_045088.1	0	NR_045088.1	A330076C08Rik	0	20	9	11	27	13	14	50	44	6	12	11	1	22	19	3
chr13	44583001	44584000	1000	*	7.94221e-05	0.0228882	24.2355	Intron (XR_873343.1/Gm40931, intron 2 of 2)	13	44533965	44568643	34679	2	Gm34276	XR_873341.2	-14358	XR_873343.1	Gm40931	0	44	42	2	27	26	1	16	11	5	21	17	4	23	15	8
chr13	45295001	45296000	1000	*	0.000102466	0.027024	-39.0464	Distal Intergenic	13	45246636	45267772	21137	2	Gm34466	XR_382303.2	-27229	NA	NA	NA	59	9	50	97	75	22	10	10	0	75	52	23	30	26	4
chr13	45474001	45475000	1000	*	3.01636e-05	0.0119507	-23.7659	Distal Intergenic	13	45507444	45546386	38943	1	Gmpr	NM_025508.5	-32444	NA	NA	NA	62	36	26	85	59	26	27	24	3	30	26	4	46	40	6
chr13	45815001	45816000	1000	*	0.000129351	0.0314264	-20.6618	Intron (NM_001199304.1/Atxn1, intron 3 of 6)	13	45552081	45795591	243511	2	Atxn1	XM_017315462.1	-19410	NM_001199304.1;NM_001199305.1;NM_009124.6;XM_011244391.2;XM_011244392.1;XM_011244388.1;XM_011244387.2;XM_011244389.2;XM_011244381.2;XM_011244383.2;XM_011244385.2;XM_011244386.2;XM_011244390.2	Atxn1;Atxn1;Atxn1;Atxn1;Atxn1;Atxn1;Atxn1;Atxn1;Atxn1;Atxn1;Atxn1;Atxn1;Atxn1	0;0;0;0;0;0;0;0;0;0;0;0;0	24	19	5	60	41	19	20	19	1	23	23	0	17	15	2
chr13	46842001	46843000	1000	*	1.29705e-06	0.00117874	32.6296	Intron (XM_011244377.2/Kif13a, intron 2 of 38)	13	46749087	46929300	180214	2	Kif13a	XM_011244377.2	86300	XM_011244377.2;NM_010617.2;XM_017315400.1;XM_006516864.3;XM_006516862.3;XM_011244376.2;XM_011244374.2;XM_011244375.2;XM_006516861.3	Kif13a;Kif13a;Kif13a;Kif13a;Kif13a;Kif13a;Kif13a;Kif13a;Kif13a	0;0;0;0;0;0;0;0;0	38	34	4	62	48	14	53	30	23	61	30	31	15	7	8
chr13	46931001	46932000	1000	*	4.21468e-05	0.0150471	-34.897	Promoter (<=1kb)	13	46749087	46931298	182212	2	Kif13a	XM_017315400.1	0	XM_011244377.2;NM_010617.2;XM_017315400.1;XM_006516864.3;XM_006516862.3;XM_011244376.2;XM_011244374.2;XM_011244375.2;XM_006516861.3	Kif13a;Kif13a;Kif13a;Kif13a;Kif13a;Kif13a;Kif13a;Kif13a;Kif13a	0;0;0;0;0;0;0;0;0	15	0	15	28	2	26	37	2	35	10	4	6	30	21	9
chr13	47428001	47429000	1000	*	7.38909e-10	2.7989e-06	-24.3837	Distal Intergenic	13	47438680	47439339	660	1	Gm35733	XR_873358.1	-9680	NA	NA	NA	124	57	67	131	69	62	111	76	35	36	26	10	143	115	28
chr13	47575001	47576000	1000	*	4.43266e-11	2.33298e-07	-42.1891	Distal Intergenic	13	47667505	47668393	889	1	4930471G24Rik	XR_382319.1	-91505	NA	NA	NA	33	20	13	99	36	63	61	48	13	16	16	0	15	14	1
chr13	47667001	47668000	1000	*	0.000114315	0.0290024	-42.8628	Promoter (<=1kb)	13	47667505	47668393	889	1	4930471G24Rik	XR_382319.1	0	XR_382319.1	4930471G24Rik	0	38	6	32	36	8	28	11	3	8	12	9	3	6	5	1
chr13	47694001	47695000	1000	*	3.45198e-08	6.94684e-05	42.7381	Distal Intergenic	13	47667505	47668393	889	1	4930471G24Rik	XR_382319.1	26496	NA	NA	NA	35	34	1	40	38	2	15	7	8	15	2	13	18	18	0
chr13	48106001	48107000	1000	*	3.10658e-10	1.28904e-06	-44.0934	Intron (NR_102303.1/A330033J07Rik, intron 1 of 2)	13	48107897	48110117	2221	2	Gm36346	XR_873366.2	3117	NR_102303.1;XR_873366.2;XR_873367.1	A330033J07Rik;Gm36346;Gm36346	0;3117;4641	96	70	26	25	8	17	54	54	0	12	12	0	29	26	3
chr13	48260001	48261000	1000	*	8.37497e-07	0.000844251	24.7236	Promoter (<=1kb)	13	48261427	48264036	2610	1	Id4	NM_031166.2	-427	NR_102303.1;NM_031166.2	A330033J07Rik;Id4	0;-427	46	22	24	103	33	70	71	8	63	78	6	72	60	16	44
chr13	48968001	48969000	1000	*	5.51409e-08	9.97123e-05	26.6464	Promoter (<=1kb)	13	48968112	48969905	1794	1	Fam120aos	NR_015601.1	0	NM_001033268.2;XR_001780775.1;XR_001780774.1;XR_001780776.1;NR_015601.1	Fam120a;Fam120a;Fam120a;Fam120a;Fam120aos	-173;-124;-124;-124;0	385	230	155	87	22	65	39	1	38	26	0	26	131	59	72
chr13	51393001	51394000	1000	*	2.4392e-12	1.75482e-08	-43.1685	Intron (XR_873398.1/Gm32834, intron 1 of 2)	13	51408618	51422797	14180	1	S1pr3	NM_010101.4	-14618	XR_873398.1;XR_873397.2	Gm32834;Gm32834	0;0	54	29	25	36	21	15	9	9	0	22	22	0	41	40	1
chr13	51418001	51419000	1000	*	1.00663e-06	0.000970716	-32.6302	Promoter (<=1kb)	13	51378153	51418686	40534	2	Gm32834	XR_873398.1	0	XR_873398.1;XR_873397.2;NM_010101.4	Gm32834;Gm32834;S1pr3	0;0;0	108	12	96	54	1	53	51	10	41	20	15	5	22	5	17
chr13	52079001	52080000	1000	*	1.16025e-05	0.00602929	-32.0491	Downstream (2-3kb)	13	52082639	52083607	969	2	Gm40948	XR_873399.1	3607	XR_873399.1	Gm40948	3607	5	4	1	15	7	8	11	10	1	29	29	0	21	20	1
chr13	52584001	52585000	1000	*	0.000110325	0.0283892	38.2355	Promoter (<=1kb)	13	52583437	52648792	65356	1	Syk	NM_001198977.1	564	XM_006516895.3;XM_006516897.3;NM_001198977.1	Syk;Syk;Syk	0;0;0	106	34	72	10	6	4	41	1	40	6	0	6	62	13	49
chr13	52858001	52859000	1000	*	1.02873e-05	0.00552946	26.2831	Intron (XM_011244372.2/Auh, intron 6 of 9)	13	52829262	52845595	16334	1	Gm33315	XR_001780949.1	28739	XM_011244372.2;NM_016709.2	Auh;Auh	0;0	24	24	0	140	133	7	25	14	11	63	59	4	25	16	9
chr13	53200001	53201000	1000	*	9.71947e-05	0.0261845	20.8773	Intron (NM_013846.3/Ror2, intron 1 of 8)	13	53109317	53286109	176793	2	Ror2	NM_013846.3	85109	NM_013846.3	Ror2	0	30	28	2	42	41	1	46	36	10	32	26	6	28	18	10
chr13	53639001	53640000	1000	*	0.000112521	0.0287852	24.0218	Promoter (<=1kb)	13	53635892	53639201	3310	2	9530014B07Rik	NR_131079.1	0	NR_131079.1	9530014B07Rik	0	57	56	1	10	9	1	11	7	4	10	8	2	12	8	4
chr13	53933001	53934000	1000	*	0.000116079	0.0292686	-31.6954	Promoter (1-2kb)	13	53932983	53935283	2301	2	Gm34557	XR_382407.2	1283	XR_382407.2;XR_873428.1	Gm34557;Gm34557	0;0	5	4	1	29	14	15	10	10	0	5	5	0	16	14	2
chr13	55595001	55596000	1000	*	0.000227955	0.0446212	36.9524	Promoter (1-2kb)	13	55593135	55597697	4563	1	Tmed9	NM_026211.3	1866	NM_001311137.1;NM_146045.2;NM_026211.3	B4galt7;B4galt7;Tmed9	-3896;-3896;0	20	20	0	11	11	0	25	23	2	7	4	3	10	4	6
chr13	55726001	55727000	1000	*	3.46685e-07	0.000419207	21.5103	Promoter (<=1kb)	13	55727116	55740580	13465	1	Pcbd2	XM_006517399.3	-116	XM_006517399.3;XM_006517401.3;XM_011244564.2;XM_006517398.2;NM_028281.1;NM_175150.3	Pcbd2;Pcbd2;Pcbd2;Pcbd2;Pcbd2;Txndc15	-116;-136;0;0;0;0	22	1	21	47	22	25	32	0	32	32	4	28	32	0	32
chr13	55761001	55762000	1000	*	0.000119019	0.0297176	-42.4113	Intron (XM_011244564.2/Pcbd2, intron 1 of 2)	13	55775455	55784505	9051	2	4930451E10Rik	XR_382470.1	22505	XM_011244564.2;XM_006517398.2;NM_028281.1	Pcbd2;Pcbd2;Pcbd2	0;0;0	10	4	6	10	6	4	47	41	6	17	17	0	10	9	1
chr13	55774001	55775000	1000	*	5.84005e-05	0.0186221	-21.5444	Intron (XM_011244564.2/Pcbd2, intron 1 of 2)	13	55775455	55784505	9051	2	4930451E10Rik	XR_382470.1	9505	XR_382470.1;XM_011244564.2;XM_006517398.2;NM_028281.1	4930451E10Rik;Pcbd2;Pcbd2;Pcbd2	9505;0;0;0	66	42	24	42	23	19	42	37	5	38	26	12	84	72	12
chr13	56151001	56152000	1000	*	0.000129221	0.03141	-35.9478	Distal Intergenic	13	56166600	56191194	24595	1	Gm31657	XR_382472.1	-14600	NA	NA	NA	26	4	22	37	5	32	7	3	4	12	9	3	9	3	6
chr13	56555001	56556000	1000	*	0.000150004	0.0346189	24.2647	Distal Intergenic	13	56529734	56548563	18830	2	Lect2	XM_011244489.2	-6438	NA	NA	NA	5	5	0	21	21	0	16	10	6	5	5	0	17	11	6
chr13	57276001	57277000	1000	*	2.98476e-06	0.00225605	-34.4381	Distal Intergenic	13	57282363	57283266	904	1	LOC105245516	XR_873502.1	-5363	NA	NA	NA	22	9	13	54	43	11	41	40	1	23	22	1	11	10	1
chr13	57979001	57980000	1000	*	5.95979e-05	0.0188941	-23.9338	Distal Intergenic	13	58023135	58023156	22	2	Mir874	NA	43156	NA	NA	NA	86	49	37	42	23	19	39	32	7	44	37	7	101	74	27
chr13	58156001	58157000	1000	*	1.33819e-06	0.00120994	-40.6527	Promoter (<=1kb)	13	58157649	58164693	7045	1	Idnk	NM_001048060.2	-649	NM_001048060.2;NM_198004.3	Idnk;Idnk	-649;-649	40	20	20	37	22	15	7	7	0	21	20	1	11	10	1
chr13	58425001	58426000	1000	*	4.98883e-05	0.0167692	-20.137	Distal Intergenic	13	58391132	58403343	12212	2	Hnrnpk	NM_001301341.1	-21658	NA	NA	NA	85	54	31	95	57	38	62	48	14	25	21	4	70	59	11
chr13	59320001	59321000	1000	*	0.000255818	0.0478433	-26.6481	Distal Intergenic	13	59235772	59255722	19951	2	Gm34672	XR_382532.2	-64279	NA	NA	NA	44	22	22	11	8	3	10	10	0	12	10	2	57	46	11
chr13	61632001	61633000	1000	*	8.93e-05	0.0247855	29.3709	Promoter (1-2kb)	13	61630023	61636282	6260	1	LOC108168055	XM_017315660.1	1978	XM_017315660.1	LOC108168055	0	32	19	13	57	43	14	17	4	13	39	19	20	43	18	25
chr13	64344001	64345000	1000	*	5.68852e-05	0.0183146	-34.8173	Promoter (<=1kb)	13	64316550	64343787	27238	2	Gm31128	XR_382570.2	-214	XR_382570.2	Gm31128	-214	40	1	39	34	19	15	6	4	2	19	10	9	22	16	6
chr13	64570001	64571000	1000	*	1.14217e-06	0.00107448	-34.9673	Distal Intergenic	13	64624067	64624802	736	2	Gm5791	Gm5791	53802	NA	NA	NA	45	16	29	10	6	4	5	5	0	5	3	2	34	30	4
chr13	65973001	65974000	1000	*	7.20486e-06	0.00424565	26.8323	Distal Intergenic	13	65978700	65990996	12297	2	Gm40987	XR_873607.1	16996	XR_873607.1	Gm40987	16996	49	30	19	68	28	40	85	22	63	36	8	28	88	22	66
chr13	66715001	66716000	1000	*	1.51187e-13	1.41297e-09	-23.4049	Distal Intergenic	13	66695345	66711165	15821	1	Gm40988	XR_873610.2	19656	XR_873610.2	Gm40988	19656	153	21	132	174	36	138	168	73	95	100	34	66	187	83	104
chr13	67066001	67067000	1000	*	2.71343e-05	0.0110707	26.9426	Downstream (2-3kb)	13	67038594	67061170	22577	2	Zfp712	NM_001166218.1	-4831	NM_001012448.2;NM_001292066.1;NM_001012325.2;NM_001012449.2;NM_001166218.1	Zfp708;Zfp708;Zfp708;Zfp708;Zfp712	14545;14545;30976;30976;-4831	33	24	9	34	27	7	71	41	30	41	6	35	12	9	3
chr13	67553001	67554000	1000	*	5.66019e-06	0.00357966	31.1246	Promoter (<=1kb)	13	67553202	67570892	17691	1	9430065F17Rik	NR_131100.1	0	NR_131100.1;NR_131098.1;NR_131099.1;NM_001035231.3	9430065F17Rik;9430065F17Rik;9430065F17Rik;Zfp748	0;0;0;0	26	11	15	29	15	14	65	7	58	42	5	37	52	13	39
chr13	69934001	69935000	1000	*	0.000268339	0.0492185	40.1328	Distal Intergenic	13	69957962	69962084	4123	1	4933416O17Rik	XR_873646.1	-22962	NA	NA	NA	5	5	0	18	18	0	19	18	1	5	1	4	37	24	13
chr13	70140001	70141000	1000	*	0.00026876	0.0492596	51.0684	Distal Intergenic	13	70232822	70248122	15301	1	4930520P13Rik	NR_036596.1	-91822	NA	NA	NA	26	15	11	18	11	7	5	0	5	5	0	5	8	2	6
chr13	70828001	70829000	1000	*	3.02064e-05	0.011961	-25.697	Intron (XM_006517266.3/Adamts16, intron 3 of 22)	13	70840423	70859615	19193	1	Gm36529	XR_382637.2	-11423	XM_006517266.3;XM_006517267.3;XM_006517268.3;XM_017315522.1;NM_172053.2;XM_006517270.3;XR_001780789.1;XM_006517272.3;XM_006517273.3	Adamts16;Adamts16;Adamts16;Adamts16;Adamts16;Adamts16;Adamts16;Adamts16;Adamts16	0;0;0;0;0;0;0;0;0	38	8	30	57	22	35	48	39	9	26	8	18	22	12	10
chr13	71051001	71052000	1000	*	6.6915e-06	0.00403416	36.1916	Distal Intergenic	13	71069601	71076179	6579	1	Gm36785	XR_382642.3	-17601	NA	NA	NA	44	29	15	51	42	9	71	35	36	27	16	11	19	1	18
chr13	71267001	71268000	1000	*	0.00021495	0.0430416	-28.9899	Distal Intergenic	13	71372533	71394296	21764	2	Gm40998	XR_873656.1	126296	NA	NA	NA	15	7	8	20	16	4	33	32	1	5	4	1	10	10	0
chr13	71690001	71691000	1000	*	2.65884e-05	0.0109058	-46.7899	Distal Intergenic	13	71729628	71785889	56262	2	Gm40999	XR_873661.1	94889	NA	NA	NA	5	2	3	11	6	5	15	14	1	34	32	2	38	36	2
chr13	72301001	72302000	1000	*	1.7417e-06	0.00148356	-20.9187	Distal Intergenic	13	72350221	72350674	454	1	Gm4052	Gm4052	-48221	NA	NA	NA	20	6	14	114	15	99	27	5	22	36	24	12	26	11	15
chr13	73418001	73419000	1000	*	4.8415e-06	0.00319035	-43.4922	Distal Intergenic	13	73467209	73516420	49212	1	Lpcat1	XM_006517188.2	-48209	NA	NA	NA	55	21	34	13	7	6	54	37	17	12	12	0	11	11	0
chr13	75426001	75427000	1000	*	1.09607e-07	0.000168626	-20.4968	Distal Intergenic	13	75645046	75645141	96	1	Mir682	NR_030451.1	-218046	NA	NA	NA	65	13	52	132	54	78	87	69	18	12	3	9	103	50	53
chr13	78601001	78602000	1000	*	4.14039e-06	0.00285347	-43.244	Intron (XR_382673.2/Gm32067, intron 1 of 3)	13	78621713	78635034	13322	1	Gm32067	XR_001781013.1	-19713	XR_382673.2;XR_001781009.1;XR_001781012.1;XR_001781011.1	Gm32067;Gm32067;Gm32067;Gm32067	0;0;0;0	10	2	8	22	3	19	38	19	19	33	29	4	26	11	15
chr13	79582001	79583000	1000	*	5.19505e-06	0.00335598	24.8868	Distal Intergenic	13	79878462	79878937	476	1	Gm19320	Gm19320	-295462	NA	NA	NA	51	51	0	41	40	1	13	10	3	8	5	3	62	51	11
chr13	80887001	80888000	1000	*	0.000131941	0.0317868	-25.8837	Promoter (<=1kb)	13	80886789	80896042	9254	1	Arrdc3	XM_006517017.3	212	XR_382418.1;NM_001042591.1;XM_006517017.3	Arrdc3;Arrdc3;Arrdc3	0;0;0	45	24	21	49	19	30	22	17	5	48	34	14	96	65	31
chr13	81351001	81352000	1000	*	1.10589e-07	0.000169875	-20.3439	Intron (XM_017315372.1/Adgrv1, intron 53 of 59)	13	81095068	81523766	428699	2	Adgrv1	XM_017315372.1	171766	XM_017315372.1;XM_017315368.1;XM_017315367.1;NM_054053.4;XM_017315365.1;XM_017315363.1;XM_017315364.1;XR_001780748.1	Adgrv1;Adgrv1;Adgrv1;Adgrv1;Adgrv1;Adgrv1;Adgrv1;Adgrv1	0;0;0;0;0;0;0;0	56	8	48	56	8	48	12	1	11	5	2	3	72	40	32
chr13	81529001	81530000	1000	*	2.56994e-05	0.0106361	-22.328	Exon (XM_017315368.1/Adgrv1, exon 13 of 75)	13	81095068	81523766	428699	2	Adgrv1	XM_017315372.1	-5235	XM_017315368.1;XM_017315367.1;NM_054053.4;XM_017315365.1;XM_017315363.1;XM_017315364.1;XR_001780748.1;XM_017315366.1;XM_017315369.1;XM_017315370.1;XM_017315371.1	Adgrv1;Adgrv1;Adgrv1;Adgrv1;Adgrv1;Adgrv1;Adgrv1;Adgrv1;Adgrv1;Adgrv1;Adgrv1	0;0;0;0;0;0;0;0;0;0;0	18	11	7	63	57	6	70	68	2	36	35	1	66	66	0
chr13	81673001	81674000	1000	*	0.000233554	0.0452924	-20.7736	3' UTR	13	81657806	81671892	14087	1	Lysmd3	NM_030257.1	15195	XM_006517475.2;NM_030257.1;NM_001081176.1	Lysmd3;Lysmd3;Polr3g	15344;15195;0	11	7	4	37	26	11	53	53	0	17	12	5	27	25	2
chr13	84905001	84906000	1000	*	0.000205743	0.0420431	-37.5713	Promoter (<=1kb)	13	84573766	84906167	332402	2	Gm34196	XR_382705.1	167	XR_382705.1;XR_873709.1;XR_001781014.1;XR_873708.1;XR_873710.1	Gm34196;Gm34196;Gm34196;Gm34196;Gm34196	0;0;0;0;0	53	31	22	58	20	38	5	5	0	23	12	11	20	20	0
chr13	85556001	85557000	1000	*	0.000227053	0.044568	29.7346	Distal Intergenic	13	85572776	85573677	902	2	Gm5666	Gm5666	16677	NA	NA	NA	28	18	10	44	14	30	22	3	19	19	5	14	40	6	34
chr13	86068001	86069000	1000	*	0.000146214	0.0339954	21.3048	Distal Intergenic	13	86044798	86046795	1998	2	Cox7c	NM_007749.3	-21206	NA	NA	NA	16	15	1	44	40	4	19	15	4	14	11	3	45	25	20
chr13	86468001	86469000	1000	*	6.59891e-06	0.00400845	-40.7665	Distal Intergenic	13	86044798	86046795	1998	2	Cox7c	NM_007749.3	-421206	NA	NA	NA	42	6	36	53	26	27	15	14	1	49	24	25	40	30	10
chr13	87390001	87391000	1000	*	7.38994e-05	0.0219091	34.4531	Distal Intergenic	13	87782971	87783976	1006	1	LOC108168058	LOC108168058	-391971	NA	NA	NA	27	18	9	23	20	3	29	10	19	27	10	17	18	10	8
chr13	89605001	89606000	1000	*	1.61282e-05	0.00766912	33.1688	Exon (XM_006517075.3/Hapln1, exon 4 of 5)	13	89662669	89663573	905	1	Gm16318	Gm16318	-56669	XM_006517075.3;NM_013500.4	Hapln1;Hapln1	0;0	63	44	19	81	56	25	41	10	31	34	5	29	73	51	22
chr13	91422001	91423000	1000	*	2.12321e-07	0.000283003	21.746	Distal Intergenic	13	91368990	91388085	19096	2	A830009L08Rik	NR_045161.1	-33916	NA	NA	NA	46	45	1	40	40	0	31	24	7	42	39	3	49	30	19
chr13	91724001	91725000	1000	*	1.3954e-05	0.00688068	-26.7483	Intron (NR_015501.1/4833422C13Rik, intron 1 of 1)	13	91741505	91784723	43219	1	Acot12	XM_006517413.3	-16505	NR_015501.1;NR_028313.1;NR_028314.1	4833422C13Rik;4833422C13Rik;4833422C13Rik	0;0;0	26	18	8	22	17	5	28	28	0	5	5	0	11	11	0
chr13	93097001	93098000	1000	*	7.72163e-07	0.000796866	25.0817	Promoter (2-3kb)	13	93094833	93098968	4136	1	A630019I02Rik	NR_046182.1	2168	NR_046182.1;NM_023821.3	A630019I02Rik;Cmya5	0;0	16	2	14	47	21	26	38	3	35	5	0	5	38	1	37
chr13	93728001	93729000	1000	*	0.000272981	0.0497242	-49.3939	Intron (NM_028772.3/Dmgdh, intron 14 of 15)	13	93706100	93719175	13076	2	AW495222	NR_045086.1	-8826	NM_028772.3	Dmgdh	0	7	0	7	66	30	36	11	10	1	11	5	6	25	20	5
chr13	94956001	94957000	1000	*	3.93457e-06	0.00276928	-27.0217	Distal Intergenic	13	94976215	95023314	47100	1	Wdr41	XM_017315491.1	-19215	NA	NA	NA	81	17	64	81	41	40	85	40	45	37	25	12	65	48	17
chr13	95459001	95460000	1000	*	2.488e-05	0.0104144	-20.9375	Distal Intergenic	13	95431376	95444831	13456	2	Crhbp	NM_198408.3	-14170	NA	NA	NA	5	4	1	32	25	7	17	17	0	13	13	0	37	37	0
chr13	95479001	95480000	1000	*	9.08962e-08	0.000145202	21.4123	Promoter (<=1kb)	13	95477301	95478655	1355	2	S100z	NM_001081159.1	-346	NM_001081159.1	S100z	-346	64	48	16	66	54	12	45	25	20	20	17	3	69	21	48
chr13	95990001	95991000	1000	*	2.38903e-05	0.0101016	23.3814	Intron (NM_029210.1/Sv2c, intron 4 of 12)	13	95627177	95891937	264761	2	Iqgap2	XM_011244681.2	-98064	NM_029210.1	Sv2c	0	56	19	37	127	61	66	17	1	16	81	20	61	45	10	35
chr13	96377001	96378000	1000	*	1.5541e-06	0.00135611	-55.2995	Promoter (<=1kb)	13	96376867	96377703	837	1	Gm8712	Gm8712	134	Gm8712	Gm8712	0	31	10	21	28	16	12	5	5	0	6	6	0	6	6	0
chr13	97035001	97036000	1000	*	0.000121513	0.0301034	-45.9905	Promoter (<=1kb)	13	97021864	97035254	13391	2	1700029F12Rik	NR_104276.1	0	NM_001080777.2;NM_001284205.1;NM_025585.3;NR_104276.1;XM_011244689.2;XR_873824.1	1700029F12Rik;1700029F12Rik;1700029F12Rik;1700029F12Rik;1700029F12Rik;Gm41028	-639;-639;-639;0;-611;0	17	10	7	5	2	3	29	25	4	24	24	0	5	5	0
chr13	97345001	97346000	1000	*	0.000100467	0.026642	-21.1111	Distal Intergenic	13	97376180	97382156	5977	1	Gm33447	XR_001780846.1	-30180	NA	NA	NA	15	10	5	45	41	4	29	29	0	32	32	0	12	12	0
chr13	98475001	98476000	1000	*	1.91897e-05	0.0086932	-24.3401	Distal Intergenic	13	98489359	98489841	483	2	LOC101055909	LOC101055909	13841	NA	NA	NA	33	21	12	54	19	35	11	7	4	40	37	3	43	28	15
chr13	98694001	98695000	1000	*	4.97227e-05	0.0167473	-27.8959	Promoter (<=1kb)	13	98686238	98694831	8594	2	Tmem171	NM_001025606.1	0	XM_006517709.3;XM_011244676.1;XM_011244677.2;NM_001025606.1;XM_011244678.1	Tmem171;Tmem171;Tmem171;Tmem171;Tmem171	0;0;0;0;0	58	21	37	131	31	100	64	29	35	10	6	4	22	15	7
chr13	98832001	98833000	1000	*	4.62051e-05	0.015999	-39.1968	Exon (XR_382806.3/Gm34995, exon 3 of 3)	13	98723406	98815768	92363	2	Fcho2	XR_873743.2	-16233	XR_382806.3	Gm34995	0	30	17	13	31	17	14	33	28	5	10	10	0	6	6	0
chr13	99294001	99295000	1000	*	4.5995e-07	0.000521485	34.6502	Distal Intergenic	13	99319649	99344678	25030	2	Ptcd2	NM_026873.2	49678	NA	NA	NA	35	27	8	20	18	2	58	12	46	50	26	24	27	20	7
chr13	99538001	99539000	1000	*	0.000195974	0.04076	-24.1314	Distal Intergenic	13	99516714	99526040	9327	1	Gm26559	XR_873866.1	21287	NA	NA	NA	42	19	23	11	9	2	47	39	8	25	20	5	5	5	0
chr13	99641001	99642000	1000	*	3.16294e-08	6.50811e-05	-42.4302	Distal Intergenic	13	99516714	99526040	9327	1	Gm26559	XR_873866.1	124287	NA	NA	NA	49	15	34	84	32	52	86	68	18	6	6	0	78	40	38
chr13	99824001	99825000	1000	*	0.000108938	0.0281565	-20.7421	Distal Intergenic	13	99898483	99900683	2201	2	Cartpt	NM_001081493.2	75683	NA	NA	NA	60	8	52	47	17	30	23	11	12	28	10	18	68	36	32
chr13	100771001	100772000	1000	*	0.000273943	0.0498347	24.7255	Promoter (<=1kb)	13	100759700	100771703	12004	2	Cenph	XM_011244667.2	0	NM_021886.1;XM_011244667.2;XM_006517676.3;XM_006517678.3	Cenph;Cenph;Cenph;Cenph	0;0;0;0	6	6	0	23	22	1	46	27	19	11	10	1	33	23	10
chr13	100847001	100848000	1000	*	9.01924e-05	0.0249564	24.798	Distal Intergenic	13	100802645	100833570	30926	2	Slc30a5	XR_382742.3	-13431	NA	NA	NA	27	9	18	15	6	9	44	1	43	6	0	6	6	2	4
chr13	101061001	101062000	1000	*	7.21914e-05	0.021569	-21.35	Intron (XR_873870.1/Gm41042, intron 2 of 3)	13	101068847	101080021	11175	1	Gm41042	XR_873872.1	-6847	XR_873870.1;XR_873871.1	Gm41042;Gm41042	0;0	100	41	59	100	35	65	58	37	21	40	23	17	37	21	16
chr13	101084001	101085000	1000	*	8.11926e-05	0.0232444	22.5198	Distal Intergenic	13	101068847	101080021	11175	1	Gm41042	XR_873872.1	15154	XR_873870.1;XR_873871.1;XR_873872.1	Gm41042;Gm41042;Gm41042	0;0;15154	35	32	3	32	30	2	32	23	9	20	19	1	30	13	17
chr13	101989001	101990000	1000	*	0.000187758	0.0396924	28.8889	Distal Intergenic	13	101998661	102014347	15687	2	Gm41044	XR_873880.1	24347	NA	NA	NA	10	10	0	17	17	0	12	8	4	5	4	1	15	10	5
chr13	102143001	102144000	1000	*	1.81478e-07	0.000249626	-38.3972	Distal Intergenic	13	101998661	102014347	15687	2	Gm41044	XR_873880.1	-128654	NA	NA	NA	44	15	29	20	8	12	15	11	4	19	14	5	58	46	12
chr13	104823001	104824000	1000	*	0.000118753	0.0296956	-20.0042	Intron (NM_026075.3/Srek1ip1, intron 1 of 4)	13	104817170	104838676	21507	1	Srek1ip1	NR_135272.1	5831	NM_026075.3;NR_135272.1	Srek1ip1;Srek1ip1	0;0	104	41	63	81	34	47	73	44	29	52	34	18	62	35	27
chr13	105038001	105039000	1000	*	1.8511e-11	1.11512e-07	-64.0909	Intron (XM_006517722.2/Rgs7bp, intron 2 of 5)	13	104945904	105053845	107942	2	Rgs7bp	XM_006517722.2	14845	XM_006517722.2;NM_029879.2	Rgs7bp;Rgs7bp	0;0	66	13	53	15	4	11	11	9	2	5	5	0	25	20	5
chr13	105343001	105344000	1000	*	1.65212e-08	3.85109e-05	53.8648	Distal Intergenic	13	105311429	105324918	13490	1	Gm41049	XR_873896.1	31572	NA	NA	NA	16	13	3	31	26	5	5	2	3	23	6	17	15	3	12
chr13	107208001	107209000	1000	*	2.10819e-17	3.34634e-13	-50.2273	Promoter (1-2kb)	13	107210533	107212526	1994	1	Gm31715	XR_382872.2	-1533	XR_382872.2	Gm31715	-1533	66	19	47	120	38	82	40	30	10	22	19	3	55	44	11
chr13	107372001	107373000	1000	*	0.000232381	0.0451489	-26.5741	Distal Intergenic	13	107332558	107348561	16004	1	Gm2736	Gm2736	39443	NA	NA	NA	28	0	28	27	0	27	32	2	30	11	7	4	61	6	55
chr13	107681001	107682000	1000	*	1.60331e-07	0.000225818	-50.9517	Distal Intergenic	13	107687397	107692168	4772	1	1700006H21Rik	NR_045900.2	-5397	NA	NA	NA	18	3	15	76	55	21	103	89	14	30	30	0	10	10	0
chr13	108255001	108256000	1000	*	6.60994e-06	0.00400845	-29.7304	Intron (XM_006517778.3/Elovl7, intron 1 of 7)	13	108231449	108235694	4246	2	Gm30747	Gm30747	-19307	XM_006517778.3;NM_029001.5	Elovl7;Elovl7	0;0	49	25	24	72	18	54	11	8	3	28	15	13	39	30	9
chr13	108259001	108260000	1000	*	4.66079e-07	0.000526643	23.1951	Intron (XM_006517778.3/Elovl7, intron 2 of 7)	13	108231449	108235694	4246	2	Gm30747	Gm30747	-23307	XM_006517778.3;NM_029001.5	Elovl7;Elovl7	0;0	10	0	10	49	28	21	31	5	26	25	0	25	6	0	6
chr13	108297001	108298000	1000	*	5.40529e-05	0.0177742	-21.7537	Distal Intergenic	13	108307624	108310986	3363	2	Gm8990	Gm8990	12986	NA	NA	NA	38	1	37	11	2	9	28	5	23	11	3	8	37	19	18
chr13	109049001	109050000	1000	*	1.77208e-11	1.07399e-07	-39.6814	Intron (NM_011056.3/Pde4d, intron 3 of 16)	13	109115890	109955969	840080	1	Pde4d	XM_006517643.1	-65890	NM_011056.3	Pde4d	0	139	91	48	75	8	67	22	11	11	20	17	3	57	56	1
chr13	109360001	109361000	1000	*	3.46534e-05	0.0131612	-36.5844	Intron (NM_011056.3/Pde4d, intron 3 of 16)	13	109324790	109324810	21	1	Mir582	NA	35211	NM_011056.3;XM_006517643.1;XM_006517644.2	Pde4d;Pde4d;Pde4d	0;0;0	17	10	7	36	22	14	14	14	0	5	5	0	29	26	3
chr13	110688001	110689000	1000	*	0.000144204	0.0337612	-22.8611	Distal Intergenic	13	110683826	110686694	2869	1	Gm33172	XR_382906.2	4175	XR_382906.2	Gm33172	4175	44	33	11	40	23	17	11	11	0	15	11	4	50	47	3
chr13	110706001	110707000	1000	*	5.7119e-06	0.003606	-24.089	Distal Intergenic	13	110683826	110686694	2869	1	Gm33172	XR_382906.2	22175	NA	NA	NA	169	103	66	62	43	19	70	56	14	10	10	0	57	50	7
chr13	111366001	111367000	1000	*	4.26811e-05	0.015189	-32.8132	Distal Intergenic	13	111361134	111361866	733	2	LOC101055980	LOC101055980	-4135	LOC101055980	LOC101055980	-4135	16	3	13	96	27	69	33	19	14	17	7	10	20	14	6
chr13	111367001	111368000	1000	*	1.3102e-05	0.00655102	-25.431	Distal Intergenic	13	111361134	111361866	733	2	LOC101055980	LOC101055980	-5135	NA	NA	NA	10	9	1	31	16	15	17	16	1	6	6	0	37	35	2
chr13	111788001	111789000	1000	*	6.86734e-09	1.88146e-05	-40.1828	Intron (NM_011945.2/Map3k1, intron 1 of 19)	13	111748740	111799549	50810	2	Map3k1	XM_017315517.1	10549	NM_011945.2;XM_017315517.1;XM_017315516.1	Map3k1;Map3k1;Map3k1	0;0;0	15	9	6	61	26	35	58	49	9	10	9	1	15	15	0
chr13	111800001	111801000	1000	*	1.79148e-05	0.00826708	28.7512	Promoter (<=1kb)	13	111748740	111799549	50810	2	Map3k1	XM_017315517.1	-452	NM_011945.2;XM_017315517.1;XM_017315516.1	Map3k1;Map3k1;Map3k1	0;0;0	24	24	0	10	10	0	24	14	10	26	25	1	27	16	11
chr13	111919001	111920000	1000	*	6.03512e-05	0.0190563	-40.4928	Distal Intergenic	13	111882252	111884419	2168	2	Ncf2-rs	Ncf2-rs	-34582	NA	NA	NA	22	13	9	26	5	21	49	28	21	20	20	0	22	18	4
chr13	112213001	112214000	1000	*	8.89721e-06	0.00499562	-29.2848	Distal Intergenic	13	112186176	112191342	5167	1	Gm33849	XR_382922.3	26825	NA	NA	NA	75	24	51	101	42	59	60	39	21	13	9	4	25	16	9
chr13	112474001	112475000	1000	*	5.13151e-05	0.0171393	-28.6021	Intron (NM_010560.3/Il6st, intron 2 of 16)	13	112464070	112506860	42791	1	Il6st	NM_010560.3	9931	NM_010560.3	Il6st	0	23	5	18	15	10	5	23	20	3	15	8	7	64	50	14
chr13	112651001	112652000	1000	*	2.87177e-05	0.0115239	-22.6632	Promoter (<=1kb)	13	112598696	112652269	53574	2	Ddx4	XM_011244619.2	269	NM_001145885.1;NM_010029.2;XM_011244618.2;XM_011244619.2;XM_011244621.2;XM_006517524.3;XM_011244622.2	Ddx4;Ddx4;Ddx4;Ddx4;Ddx4;Ddx4;Ddx4	0;0;0;0;0;0;0	118	41	77	64	34	30	43	24	19	13	10	3	85	57	28
chr13	112663001	112664000	1000	*	8.4858e-06	0.00480576	46.4425	Promoter (2-3kb)	13	112660766	112738752	77987	1	Slc38a9	NM_178746.4	2235	XM_006517670.2;XM_017315519.1;XR_001780783.1;XR_382737.3;XR_873762.2;XR_873763.2;XR_873764.2;XM_006517671.3;XM_006517673.3;NM_178746.4	Slc38a9;Slc38a9;Slc38a9;Slc38a9;Slc38a9;Slc38a9;Slc38a9;Slc38a9;Slc38a9;Slc38a9	0;0;0;0;0;0;0;0;0;0	10	10	0	16	16	0	19	11	8	8	2	6	18	14	4
chr13	112751001	112752000	1000	*	0.000188376	0.0397586	-30.3608	Distal Intergenic	13	112768458	112799371	30914	1	Gm41067	XR_873969.1	-16458	NA	NA	NA	21	6	15	10	9	1	22	17	5	6	6	0	24	22	2
chr13	112752001	112753000	1000	*	7.90465e-05	0.0228478	-20.1368	Distal Intergenic	13	112768458	112799371	30914	1	Gm41067	XR_873969.1	-15458	NA	NA	NA	90	23	67	49	4	45	80	35	45	92	17	75	121	59	62
chr13	113036001	113037000	1000	*	1.1364e-06	0.00107106	-44.9132	Promoter (<=1kb)	13	113036008	113036028	21	1	Mir449c	NA	0	XR_873755.1;XM_011244659.1;XM_011244661.1;XM_011244662.1;XM_011244660.1;XM_006517653.2;XM_006517655.2;NM_001281487.1;NR_029961.1;NA;NA;NR_030602.1;NA;NR_030452.1;NA;NA	Cdc20b;Cdc20b;Cdc20b;Cdc20b;Cdc20b;Cdc20b;Cdc20b;Cdc20b;Mir449a;Mir449a;Mir449a;Mir449b;Mir449b;Mir449c;Mir449c;Mir449c	0;0;0;0;0;0;0;0;-534;-549;-589;-419;-429;0;0;0	35	6	29	46	11	35	32	14	18	16	15	1	17	10	7
chr13	114407001	114408000	1000	*	0.000109089	0.0281635	-39.9316	Distal Intergenic	13	114287795	114388094	100300	2	Ndufs4	NM_010887.2	-18907	NA	NA	NA	30	11	19	29	15	14	13	13	0	7	6	1	12	8	4
chr13	114443001	114444000	1000	*	0.000168842	0.0372062	-26.8923	Distal Intergenic	13	114437790	114438214	425	2	Gm41073	Gm41073	-4787	Gm41073	Gm41073	-4787	81	18	63	70	11	59	8	4	4	9	4	5	51	22	29
chr13	114571001	114572000	1000	*	0.000182167	0.0389745	-34.8291	Distal Intergenic	13	114586510	114607124	20615	2	4930467J12Rik	XR_873987.1	35124	NA	NA	NA	30	15	15	26	18	8	5	5	0	15	15	0	24	20	4
chr13	114603001	114604000	1000	*	1.07396e-05	0.00571558	-38.0267	Intron (XR_873987.1/4930467J12Rik, intron 1 of 1)	13	114586510	114607124	20615	2	4930467J12Rik	XR_873987.1	3124	XR_873987.1;NR_045976.1	4930467J12Rik;4930544M13Rik	0;-3228	26	2	24	25	7	18	47	19	28	24	16	8	38	23	15
chr13	115273001	115274000	1000	*	2.75697e-12	1.96926e-08	-24.2681	Distal Intergenic	13	115109830	115135838	26009	1	Gm41075	XR_001780853.1	163171	NA	NA	NA	72	39	33	51	47	4	62	61	1	55	55	0	82	77	5
chr13	115376001	115377000	1000	*	7.52313e-05	0.022166	-21.8316	Distal Intergenic	13	115528501	115529797	1297	2	Gm6035	Gm6035	152797	NA	NA	NA	56	8	48	119	30	89	68	24	44	40	18	22	72	32	40
chr13	116295001	116296000	1000	*	0.000181234	0.0388497	37.5919	Downstream (2-3kb)	13	116298270	116309688	11419	2	Isl1	NM_021459.4	13688	XM_017315398.1;XM_006517533.2;NM_021459.4	Isl1;Isl1;Isl1	13720;13721;13688	25	22	3	39	28	11	16	2	14	19	11	8	46	26	20
chr13	116818001	116819000	1000	*	8.21057e-05	0.0233986	24.1411	Intron (XR_382939.1/4930435F18Rik, intron 3 of 3)	13	116802095	116838178	36084	2	4930435F18Rik	XR_382939.1	19178	XR_382939.1	4930435F18Rik	0	15	14	1	62	59	3	46	34	12	31	29	2	21	9	12
chr13	117159001	117160000	1000	*	5.60017e-09	1.59096e-05	-20.5858	Distal Intergenic	13	117130025	117135884	5860	1	Gm6416	NR_046023.1	28976	NA	NA	NA	179	88	91	249	117	132	83	61	22	101	65	36	182	124	58
chr13	117429001	117430000	1000	*	3.30756e-06	0.00243382	-33.3761	Distal Intergenic	13	117457772	117459126	1355	2	Gm5200	Gm5200	29126	NA	NA	NA	39	16	23	24	20	4	20	19	1	10	10	0	12	11	1
chr13	118587001	118588000	1000	*	9.77775e-06	0.00534011	-32.3636	Exon (NR_045982.1/1700003P14Rik, exon 3 of 4)	13	118568772	118569783	1012	2	Gm9098	Gm9098	-17218	NR_045982.1	1700003P14Rik	0	16	10	6	46	21	25	31	27	4	15	15	0	18	13	5
chr14	6080001	6081000	1000	*	1.5314e-06	0.00134216	-51.5152	Distal Intergenic	14	6088352	6097373	9022	2	LOC102638110	LOC102638110	16373	NA	NA	NA	6	2	4	22	14	8	17	17	0	5	5	0	13	13	0
chr14	6815001	6816000	1000	*	0.000216981	0.0432768	32.1755	Distal Intergenic	14	6834594	6840373	5780	2	Gm3642	XM_011244862.1	24373	NA	NA	NA	57	50	7	22	21	1	13	5	8	16	10	6	22	17	5
chr14	7996001	7997000	1000	*	4.00477e-06	0.00280446	-32.5614	Promoter (1-2kb)	14	7965187	7994765	29579	2	Dnase1l3	XM_006517921.3	-1236	NM_007870.3;XM_006517921.3;XR_383076.3	Dnase1l3;Dnase1l3;Gm30244	-1819;-1236;0	25	21	4	38	13	25	20	15	5	17	17	0	18	18	0
chr14	10713001	10714000	1000	*	2.20066e-07	0.000291865	-60.2973	Intron (XM_006517924.1/Fhit, intron 2 of 7)	14	10738553	10779001	40449	1	Fhitos	NR_131139.1	-24553	XM_006517924.1;XM_006517927.3;XM_017315847.1;XM_011244732.2;NM_001308285.1;NM_010210.3	Fhit;Fhit;Fhit;Fhit;Fhit;Fhit	0;0;0;0;0;0	17	1	16	22	2	20	28	13	15	5	4	1	13	10	3
chr14	11162001	11163000	1000	*	1.27628e-07	0.000189641	-38.4567	Promoter (<=1kb)	14	9550092	11162013	1611922	2	Fhit	XM_017315847.1	0	XM_017315847.1;XM_011244732.2;NM_001308285.1;NM_010210.3	Fhit;Fhit;Fhit;Fhit	0;0;0;0	91	2	89	50	1	49	5	5	0	5	0	5	60	13	47
chr14	13917001	13918000	1000	*	3.08634e-05	0.0121462	28.0994	Promoter (2-3kb)	14	13828428	13914521	86094	2	Gm281	XM_011244864.1	-2480	XM_011244864.1	Gm281	-2480	39	16	23	87	29	58	12	0	12	31	5	26	45	5	40
chr14	17262001	17263000	1000	*	0.000235738	0.0455772	-32.6606	Distal Intergenic	14	17330675	17407786	77112	2	Gm32121	XR_383103.1	144786	NA	NA	NA	25	19	6	43	19	24	11	11	0	8	8	0	46	36	10
chr14	20068001	20069000	1000	*	0.000237331	0.045808	-50.2176	Distal Intergenic	14	20077103	20082871	5769	2	Saysd1	XM_017316166.1	13871	NA	NA	NA	13	11	2	11	0	11	15	13	2	5	5	0	11	10	1
chr14	21664001	21665000	1000	*	2.01077e-05	0.00896466	22.3932	Exon (XM_006519265.3/Kat6b, exon 16 of 17)	14	21676212	21703593	27382	2	Dupd1	XM_006519217.3	38593	XM_006519265.3;XM_006519264.3;NM_001205241.1;NM_017479.3;XM_017316082.1;XM_006519263.3;XM_006519268.3;XM_017316083.1;XM_017316084.1;XM_006519269.3;XM_017316085.1	Kat6b;Kat6b;Kat6b;Kat6b;Kat6b;Kat6b;Kat6b;Kat6b;Kat6b;Kat6b;Kat6b	0;0;0;0;0;0;0;0;0;0;0	27	26	1	59	56	3	16	12	4	23	21	2	30	16	14
chr14	25759001	25760000	1000	*	0.00019544	0.0407017	21.0101	Intron (NM_001101433.1/Zcchc24, intron 1 of 3)	14	25711640	25768856	57217	2	Zcchc24	NM_001101433.1	8856	NM_001101433.1	Zcchc24	0	22	22	0	22	22	0	11	7	4	15	11	4	10	10	0
chr14	26454001	26455000	1000	*	8.56049e-05	0.0240463	20.0131	Intron (XM_006519726.1/Slmap, intron 11 of 21)	14	26413168	26443009	29842	2	Slmap	XM_006519738.2	-10992	XM_006519726.1;XM_006519727.1;XM_006519728.1;XM_006519729.1;XM_006519730.1;XM_006519731.1;XM_006519732.1;XM_006519734.1;XM_006519735.1;XM_006519736.1;XM_006519737.1;XM_017316229.1;XM_006519733.2;XM_006519725.2;NM_001310445.1;NM_032008.4;XM_017316227.1;XM_017316228.1	Slmap;Slmap;Slmap;Slmap;Slmap;Slmap;Slmap;Slmap;Slmap;Slmap;Slmap;Slmap;Slmap;Slmap;Slmap;Slmap;Slmap;Slmap	0;0;0;0;0;0;0;0;0;0;0;0;0;0;0;0;0;0	52	47	5	49	47	2	69	57	12	23	16	7	58	39	19
chr14	26969001	26970000	1000	*	2.60448e-08	5.62523e-05	-55.5291	Promoter (<=1kb)	14	26966234	26968808	2575	2	Gm41114	XR_874477.1	-193	XM_017316214.1;XM_006519608.1;XR_001781159.1;NM_145221.2;XR_001781158.1;XR_001781160.1;XR_874477.1	Appl1;Appl1;Appl1;Appl1;Appl1;Appl1;Gm41114	0;0;0;0;0;0;-193	49	14	35	19	0	19	36	25	11	5	3	2	10	8	2
chr14	27000001	27001000	1000	*	2.83467e-09	9.02761e-06	-29.4343	Promoter (<=1kb)	14	27000362	27002326	1965	1	Hesx1	NM_010420.2	0	XM_006518570.3;NM_010420.2	Hesx1;Hesx1	0;0	26	8	18	100	17	83	42	32	10	22	9	13	7	3	4
chr14	27022001	27023000	1000	*	8.40425e-05	0.0237677	45.332	Distal Intergenic	14	27038989	27107286	68298	1	Il17rd	XM_006518667.3	-15989	NA	NA	NA	18	18	0	24	23	1	17	16	1	7	0	7	11	7	4
chr14	27428001	27429000	1000	*	1.64582e-05	0.0078001	38.256	Promoter (<=1kb)	14	27428840	27481060	52221	1	Fam208a	XR_383159.3	0	XR_383159.3;XR_383158.3;XM_006518820.3;XM_017315961.1;NM_001114879.1;NM_028945.1	Fam208a;Fam208a;Fam208a;Fam208a;Fam208a;Fam208a	0;0;0;0;0;0	16	7	9	5	4	1	5	3	2	35	1	34	50	4	46
chr14	28380001	28381000	1000	*	0.000122417	0.0302189	23.1555	Intron (XM_006518932.3/Erc2, intron 18 of 18)	14	28505473	28525515	20043	1	Wnt5a	NM_009524.3	-124473	XM_006518932.3;XM_006518930.2;XM_006518931.2;XM_006518933.2;XM_006518934.2;XM_006518935.2;XM_006518936.2;XM_006518937.2;XM_006518938.2;XM_006518939.2;XM_006518942.2;XM_006518943.2;XM_006518944.2;XM_006518945.2;XM_006518946.3;XM_011245046.1;XM_011245047.1;XM_017315995.1;XM_017315997.1;XM_017315999.1;XM_017316000.1;XM_017316001.1;XM_017316003.1;XR_001781112.1;XR_001781113.1;XR_001781114.1;XR_001781…	Erc2;Erc2;Erc2;Erc2;Erc2;Erc2;Erc2;Erc2;Erc2;Erc2;Erc2;Erc2;Erc2;Erc2;Erc2;Erc2;Erc2;Erc2;Erc2;Erc2;Erc2;Erc2;Erc2;Erc2;Erc2;Erc2;Erc2;Erc2;Erc2;Erc2;Erc2;Erc2;Erc2;Erc2;Erc2;Erc2	0;0;0;0;0;0;0;0;0;0;0;0;0;0;0;0;0;0;0;0;0;0;0;0;0;0;0;0;0;0;0;0;0;0;0;0	38	38	0	22	21	1	23	18	5	11	7	4	33	27	6
chr14	30353001	30354000	1000	*	9.68827e-10	3.54882e-06	-28.1486	Promoter (<=1kb)	14	30039941	30353486	313546	2	Cacna1d	NM_001083616.2	0	XM_017315818.1;NM_001083616.2;NM_001302637.1;XM_006518475.1;XM_006518479.1;XM_006518480.1;XM_017315808.1;XM_017315809.1;XM_017315810.1;XM_017315811.1;XM_017315812.1;XM_017315813.1;XM_017315814.1;XM_017315815.1;XM_017315816.1;XM_017315817.1;XM_017315819.1;XM_017315823.1;XM_017315824.1;XM_017315825.1;XR_001781092.1;NM_028981.3;XM_017315822.1;XM_017315820.1;XM_017315821.1	Cacna1d;Cacna1d;Cacna1d;Cacna1d;Cacna1d;Cacna1d;Cacna1d;Cacna1d;Cacna1d;Cacna1d;Cacna1d;Cacna1d;Cacna1d;Cacna1d;Cacna1d;Cacna1d;Cacna1d;Cacna1d;Cacna1d;Cacna1d;Cacna1d;Cacna1d;Cacna1d;Cacna1d;Cacna1d	-123;0;0;0;0;0;0;0;0;0;0;0;0;0;0;0;0;0;0;0;0;0;0;0;0	114	38	76	41	0	41	128	42	86	268	123	145	610	340	270
chr14	30533001	30534000	1000	*	4.66286e-05	0.0160955	63.8104	Distal Intergenic	14	30549131	30574724	25594	1	Tkt	NM_009388.6	-15131	NA	NA	NA	37	29	8	12	11	1	6	0	6	11	7	4	5	0	5
chr14	30653001	30654000	1000	*	1.70553e-05	0.00800326	23.3602	Promoter (<=1kb)	14	30654340	30690650	36311	1	Rft1	XR_001781128.1	-340	XR_001781128.1;XR_383188.2;XR_383189.2;NM_177815.3	Rft1;Rft1;Rft1;Rft1	-340;-340;-340;-375	31	25	6	56	46	10	10	9	1	28	10	18	31	15	16
chr14	30717001	30718000	1000	*	1.58645e-07	0.000223759	-27.1332	Promoter (<=1kb)	14	30716120	30822713	106594	1	Sfmbt1	XM_006519288.3	881	XM_006519289.3;XM_011245121.2;NM_019460.2;NM_001166531.1;XM_011245120.2;NM_001166532.1;XM_006519287.3;XM_006519288.3	Sfmbt1;Sfmbt1;Sfmbt1;Sfmbt1;Sfmbt1;Sfmbt1;Sfmbt1;Sfmbt1	0;0;0;0;0;0;0;0	8	0	8	45	2	43	56	22	34	11	0	11	41	20	21
chr14	31112001	31113000	1000	*	2.65775e-07	0.000337707	36.7901	Intron (XM_017316159.1/Pbrm1, intron 28 of 30)	14	31088127	31128930	40804	2	Smim4	NM_001308464.1	15930	XM_017316159.1;NM_001081251.1;XM_006519416.1;XM_006519427.3;XM_006519402.3;XM_006519406.3;XM_006519407.3;XM_006519408.3;XM_006519410.3;XM_006519412.3;XM_006519413.3;XM_006519414.3;XM_006519415.3;XM_017316141.1;XM_017316145.1;XM_017316148.1;XM_017316150.1;XM_017316160.1;XM_006519423.3;XM_006519411.3;XM_006519419.2;XM_017316153.1;XM_017316154.1;XM_017316155.1;XM_017316157.1;XM_017316158.1;XM_006519…	Pbrm1;Pbrm1;Pbrm1;Pbrm1;Pbrm1;Pbrm1;Pbrm1;Pbrm1;Pbrm1;Pbrm1;Pbrm1;Pbrm1;Pbrm1;Pbrm1;Pbrm1;Pbrm1;Pbrm1;Pbrm1;Pbrm1;Pbrm1;Pbrm1;Pbrm1;Pbrm1;Pbrm1;Pbrm1;Pbrm1;Pbrm1;Pbrm1;Pbrm1;Pbrm1;Pbrm1;Pbrm1;Pbrm1;Pbrm1;Pbrm1;Pbrm1;Pbrm1;Pbrm1;Pbrm1;Pbrm1;Pbrm1;Pbrm1;Pbrm1;Pbrm1;Pbrm1;Pbrm1;Pbrm1;Pbrm1;Pbrm1;Pbrm1;Smim4;Smim4	0;0;0;0;0;0;0;0;0;0;0;0;0;0;0;0;0;0;0;0;0;0;0;0;0;0;0;0;0;0;0;0;0;0;0;0;0;0;0;0;0;0;0;0;0;0;0;0;0;0;0;0	26	26	0	10	8	2	10	7	3	5	3	2	27	8	19
chr14	31323001	31324000	1000	*	5.93817e-05	0.0188513	28.4848	Promoter (<=1kb)	14	31260375	31323896	63522	2	Dnah1	NM_001033668.1	0	XM_017315798.1;NM_001033668.1;XM_017315799.1;XM_006518426.3;XM_006518427.3;XR_001781209.1;XR_874493.1;XR_383327.1	Dnah1;Dnah1;Dnah1;Dnah1;Dnah1;Gm35823;Gm35823;Gm35823	-2078;0;0;0;0;55132;55132;54084	15	13	2	31	31	0	5	5	0	11	6	5	10	4	6
chr14	32514001	32515000	1000	*	3.59469e-06	0.00258038	-33.236	Promoter (<=1kb)	14	32513521	32580989	67469	1	Ercc6	NM_001081221.1	480	XM_006519121.3;XR_383187.3;XM_006519120.3;XM_006519123.3;NM_001081221.1;XM_006519122.2;XM_006519124.3	Ercc6;Ercc6;Ercc6;Ercc6;Ercc6;Ercc6;Ercc6	0;0;0;0;0;-2291;-3970	32	3	29	44	10	34	34	19	15	30	14	16	64	29	35
chr14	32661001	32662000	1000	*	3.55393e-05	0.013409	-31.3492	Exon (XM_006518318.3/3425401B19Rik, exon 4 of 4)	14	32659118	32683362	24245	2	3425401B19Rik	XM_006518318.3	21362	XM_006518318.3;XM_006518319.3;XM_006518314.3;XM_006518315.3;XM_006518316.3;XM_006518317.3;NM_001195097.1	3425401B19Rik;3425401B19Rik;3425401B19Rik;3425401B19Rik;3425401B19Rik;3425401B19Rik;3425401B19Rik	0;0;0;0;0;0;0	32	12	20	27	6	21	16	5	11	35	30	5	6	4	2
chr14	32995001	32996000	1000	*	1.0994e-05	0.00580773	-42.9993	Promoter (2-3kb)	14	32992395	33015300	22906	1	Lrrc18	XM_006519457.3	2606	NM_001146021.1;NM_026253.4;XM_006519458.3;XM_006519457.3;NM_001146022.2;XM_006519279.3;XM_006519277.3;XM_006519278.3;XM_011245118.2;XM_011245119.2	Lrrc18;Lrrc18;Lrrc18;Lrrc18;Wdfy4;Wdfy4;Wdfy4;Wdfy4;Wdfy4;Wdfy4	0;0;0;0;0;0;0;0;0;0	41	3	38	23	4	19	11	8	3	6	2	4	5	3	2
chr14	33525001	33526000	1000	*	8.24578e-05	0.0234588	-28.2122	Intron (XM_017316244.1/Gm626, intron 14 of 29)	14	33483501	33575269	91769	1	Gm626	XM_017316244.1	41500	XM_017316244.1	Gm626	0	5	2	3	55	19	36	37	28	9	7	4	3	22	14	8
chr14	35996001	35997000	1000	*	0.000101453	0.0268395	-28.3351	Distal Intergenic	14	36013482	36015745	2264	1	LOC108168188	LOC108168188	-16482	NA	NA	NA	39	24	15	33	16	17	10	10	0	21	13	8	59	52	7
chr14	37113001	37114000	1000	*	5.03083e-05	0.0168763	34.9473	Promoter (2-3kb)	14	37102140	37110101	7962	2	2610528A11Rik	NM_001206684.1	-2900	NM_001206684.1	2610528A11Rik	-2900	5	5	0	23	22	1	11	7	4	12	9	3	32	16	16
chr14	37361001	37362000	1000	*	5.31082e-05	0.0175444	-30.8443	Distal Intergenic	14	37120444	37135322	14879	2	Ghitm	NM_078478.5	-225679	NA	NA	NA	29	22	7	47	19	28	32	26	6	6	6	0	28	24	4
chr14	37569001	37570000	1000	*	0.000131979	0.0317868	-21.9849	Distal Intergenic	14	37601107	37606799	5693	2	Gm31393	XR_383360.1	36799	NA	NA	NA	50	29	21	33	22	11	39	32	7	41	36	5	71	59	12
chr14	41503001	41504000	1000	*	2.7727e-06	0.00211818	-22.8188	Distal Intergenic	14	41518317	41520186	1870	1	LOC108168149	XR_001781229.1	-14317	NA	NA	NA	34	26	8	62	23	39	47	30	17	38	33	5	59	52	7
chr14	45315001	45316000	1000	*	8.66078e-05	0.0242531	20.6763	Promoter (2-3kb)	14	45283087	45318572	35486	2	Ero1l	NM_015774.3	2572	NM_015774.3	Ero1l	0	46	41	5	22	22	0	45	28	17	10	9	1	36	25	11
chr14	45463001	45464000	1000	*	0.000177916	0.038402	24.89	Intron (NM_146054.2/Fermt2, intron 12 of 14)	14	45442395	45447067	4673	2	Gm34250	XR_383393.2	-15934	NM_146054.2;XM_006518826.2;XM_006518827.2;XM_006518828.2	Fermt2;Fermt2;Fermt2;Fermt2	0;0;0;0	10	10	0	16	16	0	5	4	1	11	8	3	73	53	20
chr14	45773001	45774000	1000	*	1.36951e-13	1.3043e-09	61.7053	Distal Intergenic	14	45713347	45713826	480	1	LOC101056029	LOC101056029	59654	NA	NA	NA	33	30	3	51	30	21	46	2	44	5	0	5	37	13	24
chr14	45878001	45879000	1000	*	3.59303e-06	0.00258038	55	Distal Intergenic	14	45858055	45858546	492	2	Gm8317	Gm8317	-19455	NA	NA	NA	5	4	1	10	3	7	10	0	10	5	0	5	26	0	26
chr14	45906001	45907000	1000	*	8.4819e-05	0.0239293	44.2763	Distal Intergenic	14	45925518	45926203	686	1	LOC108168191	LOC108168191	-18518	NA	NA	NA	18	16	2	18	17	1	38	26	12	16	7	9	10	3	7
chr14	46037001	46038000	1000	*	9.07991e-07	0.000900784	-29.2434	Distal Intergenic	14	46027428	46029222	1795	1	Gm6580	Gm6580	9573	NA	NA	NA	21	12	9	65	44	21	48	46	2	32	29	3	61	54	7
chr14	46821001	46822000	1000	*	1.02642e-05	0.0055273	47.7343	Promoter (<=1kb)	14	46808149	46822242	14094	2	Gmfb	NM_022023.2	242	NM_022023.2	Gmfb	0	35	5	30	6	5	1	21	0	21	31	1	30	41	0	41
chr14	46976001	46977000	1000	*	0.000113815	0.0289901	29.0909	Intron (NM_001037221.2/Samd4, intron 2 of 12)	14	46954830	46954928	99	2	Mir378c	NR_105813.1	-21073	NM_001037221.2;NM_028966.3;XM_006519627.2	Samd4;Samd4;Samd4	0;0;0	21	21	0	23	23	0	5	4	1	5	3	2	11	8	3
chr14	48174001	48175000	1000	*	5.55793e-05	0.0180805	21.2736	Intron (XM_011245231.2/Peli2, intron 2 of 6)	14	48198716	48228413	29698	1	Gm6498	NR_003630.2	-23716	XM_011245231.2;XM_006519742.3;XM_006519741.2;NM_033602.2;XM_006519740.3	Peli2;Peli2;Peli2;Peli2;Peli2	0;0;0;0;0	31	26	5	49	46	3	38	27	11	23	18	5	43	23	20
chr14	48869001	48870000	1000	*	2.84948e-05	0.0114678	35.8374	Promoter (<=1kb)	14	48870315	48873349	3035	1	LOC108168160	XR_001781256.1	-315	XR_001781254.1;XR_001781253.1;XR_874608.1;XR_001781255.1;XR_383415.2;XR_874607.1;XR_874609.1;XR_874610.1;XR_001781256.1	Gm41149;Gm41149;LOC102639645;LOC102639645;LOC102639645;LOC102639645;LOC102639645;LOC102639645;LOC108168160	13535;10525;0;0;0;0;0;0;-315	42	32	10	17	14	3	24	8	16	18	6	12	11	7	4
chr14	48990001	48991000	1000	*	1.94816e-06	0.00162077	-41.5512	Distal Intergenic	14	48982480	48985105	2626	2	Gm36024	XR_383418.2	-4896	XR_383418.2	Gm36024	-4896	33	5	28	5	1	4	21	11	10	10	3	7	20	19	1
chr14	50381001	50382000	1000	*	0.000246145	0.0468312	-30.6988	Distal Intergenic	14	50392758	50393696	939	1	Olfr736	NM_146666.1	-10758	NA	NA	NA	47	38	9	69	28	41	18	15	3	11	10	1	6	6	0
chr14	50808001	50809000	1000	*	4.79301e-05	0.0164201	-33.7967	Promoter (<=1kb)	14	50807946	50821300	13355	1	Parp2	NM_009632.2	55	XM_006518442.3;NM_009632.2;NR_002142.2	Parp2;Parp2;Rpph1	0;0;-230	15	5	10	27	0	27	41	10	31	20	7	13	25	23	2
chr14	51179001	51180000	1000	*	1.78369e-05	0.00825018	31.256	Distal Intergenic	14	51195486	51195923	438	2	Ang2	NM_007449.2	15923	NA	NA	NA	22	22	0	12	12	0	10	7	3	23	16	7	15	10	5
chr14	51503001	51504000	1000	*	5.06692e-06	0.00329663	-28.1579	Intron (XR_001781257.1/Gm7247, intron 3 of 7)	14	51552767	51662952	110186	1	Gm5622	XM_006519216.1	-48767	XR_001781257.1	Gm7247	0	30	21	9	19	14	5	34	34	0	7	7	0	5	5	0
chr14	52259001	52260000	1000	*	2.58858e-07	0.000331444	20.8627	Promoter (1-2kb)	14	52198151	52257807	59657	2	Chd8	XM_017316172.1	-1194	XM_011245165.2;XM_017316172.1;XM_006519476.3;NM_172601.3	Chd8;Chd8;Chd8;Rab2b	-1195;-1194;-1195;19395	56	54	2	73	72	1	24	12	12	12	12	0	10	8	2
chr14	52304001	52305000	1000	*	3.0742e-05	0.0121175	-58.8889	Promoter (<=1kb)	14	52294841	52305081	10241	2	Mettl3	XM_017316096.1	81	XM_017316096.1;XM_006519311.3;NM_019721.2;XR_001781135.1;XR_001781134.1	Mettl3;Mettl3;Mettl3;Mettl3;Mettl3	0;0;0;0;0	36	8	28	12	0	12	30	15	15	6	6	0	5	3	2
chr14	52338001	52339000	1000	*	1.05471e-12	8.23993e-09	-23.6211	Distal Intergenic	14	52311177	52328670	17494	2	Sall2	NM_015772.3	-9331	NA	NA	NA	61	58	3	110	53	57	62	61	1	39	37	2	40	37	3
chr14	52429001	52430000	1000	*	1.44448e-06	0.00127943	-34.2384	Promoter (1-2kb)	14	52427967	52428876	910	1	Trav1	Trav1	1034	Trav1	Trav1	1034	57	14	43	32	12	20	46	26	20	28	19	9	28	20	8
chr14	52689001	52690000	1000	*	3.19878e-05	0.0124728	33.8432	Distal Intergenic	14	52683964	52684472	509	1	Trav7d-2	Trav7d-2	5037	Trav7d-2	Trav7d-2	5037	23	19	4	31	29	2	20	6	14	25	17	8	17	11	6
chr14	54255001	54256000	1000	*	6.44252e-05	0.0199644	-30.3077	Promoter (<=1kb)	14	54254129	54269169	15041	1	Abhd4	NM_001205181.1	872	NM_001205181.1;XR_383129.2;NM_134076.2;XM_006518367.2;NM_001113358.1;NM_010015.4	Abhd4;Abhd4;Abhd4;Abhd4;Dad1;Dad1	0;-3207;-3232;-3345;-1072;-1072	19	10	9	46	20	26	21	21	0	6	4	2	19	13	6
chr14	54324001	54325000	1000	*	2.44462e-07	0.00031666	-24.2463	Distal Intergenic	14	54293018	54297322	4305	2	LOC108168162	XR_001781259.1	-26679	NA	NA	NA	72	52	20	57	33	24	38	32	6	45	41	4	81	75	6
chr14	54430001	54431000	1000	*	7.55419e-05	0.0222086	24.8422	Promoter (<=1kb)	14	54431598	54442456	10859	1	Mmp14	NM_008608.4	-598	NM_008608.4;NM_026851.2	Mmp14;Mrpl52	-598;3092	51	19	32	28	9	19	30	2	28	31	4	27	20	2	18
chr14	55458001	55459000	1000	*	9.64391e-05	0.0260796	-32.1958	Distal Intergenic	14	55466366	55468537	2172	2	Gm41158	XR_874641.1	9537	NA	NA	NA	54	7	47	10	1	9	28	9	19	18	7	11	20	12	8
chr14	55470001	55471000	1000	*	0.000175391	0.0380705	39.7101	Promoter (1-2kb)	14	55466366	55468537	2172	2	Gm41158	XR_874641.1	-1464	XR_874641.1	Gm41158	-1464	26	18	8	16	11	5	44	15	29	16	7	9	10	1	9
chr14	56277001	56278000	1000	*	2.99444e-06	0.00225956	-20.0466	Distal Intergenic	14	56258856	56262260	3405	2	Gzmb	NM_013542.2	-14741	NA	NA	NA	18	15	3	51	34	17	41	41	0	33	30	3	52	49	3
chr14	56336001	56337000	1000	*	1.8863e-06	0.00157718	-21.3454	Distal Intergenic	14	56365068	56388551	23484	1	Atp12a	NM_138652.2	-28068	NA	NA	NA	58	35	23	87	34	53	56	35	21	69	47	22	86	71	15
chr14	56563001	56564000	1000	*	3.77164e-06	0.00268444	28.5128	Exon (NM_001014996.2/Cenpj, exon 3 of 17)	14	56526761	56571846	45086	2	Cenpj	NM_001014996.2	7846	NM_001014996.2;XM_006518847.2;XM_006518849.2;XM_006518851.3	Cenpj;Cenpj;Cenpj;Cenpj	0;0;0;0	10	10	0	40	40	0	26	23	3	25	24	1	20	6	14
chr14	57397001	57398000	1000	*	3.4144e-05	0.0130221	-27.8859	Promoter (<=1kb)	14	57275034	57398483	123450	2	Cryl1	NM_030004.3	483	NM_030004.3	Cryl1	0	40	13	27	23	20	3	32	28	4	16	16	0	73	55	18
chr14	57525001	57526000	1000	*	8.53671e-17	1.21953e-12	25.4273	Promoter (<=1kb)	14	57524829	57543166	18338	1	Il17d	NM_145837.3	172	NM_145837.3	Il17d	0	481	297	184	172	102	70	101	27	74	45	24	21	111	28	83
chr14	58134001	58135000	1000	*	8.99843e-06	0.00504114	-21.7042	Distal Intergenic	14	58075496	58112854	37359	1	Fgf9	XM_006518554.3	58505	NA	NA	NA	69	7	62	30	7	23	109	42	67	109	38	71	31	13	18
chr14	58614001	58615000	1000	*	2.04408e-07	0.000274005	-34.6767	Distal Intergenic	14	58428853	58445140	16288	1	Gm33430	XR_383466.1	185148	NA	NA	NA	40	12	28	41	19	22	40	29	11	13	9	4	69	53	16
chr14	59439001	59440000	1000	*	0.000253288	0.0475569	-32.5138	Promoter (<=1kb)	14	59402009	59440880	38872	2	Setdb2	NM_001320720.1	880	XM_017316176.1;XM_017316177.1;XM_006519494.2;NM_026908.3;NM_001320720.1;NM_001320721.1;NR_135463.1;NM_001320725.1	Cab39l;Cab39l;Cab39l;Cab39l;Setdb2;Setdb2;Setdb2;Setdb2-phf11c	-955;-955;-964;-981;0;0;0;0	26	6	20	17	16	1	15	11	4	13	13	0	7	7	0
chr14	59731001	59732000	1000	*	5.9066e-06	0.00369561	-22.2461	Intron (XM_006519232.3/Atp8a2, intron 33 of 36)	14	59625281	59631660	6380	1	Shisa2	NM_145463.5	105720	XM_006519232.3;XM_006519235.3;XM_006519234.3;XM_017316077.1;NM_015803.2	Atp8a2;Atp8a2;Atp8a2;Atp8a2;Atp8a2	0;0;0;0;0	23	17	6	70	50	20	71	67	4	19	19	0	52	47	5
chr14	60252001	60253000	1000	*	0.000156776	0.0355099	21.3236	Promoter (<=1kb)	14	60251493	60263907	12415	1	Gm38641	XR_874662.2	508	XR_874661.1;XR_874660.2;XR_874662.2;NM_170591.1	Gm38641;Gm38641;Gm38641;Nupl1	0;0;0;-623	31	5	26	10	4	6	66	1	65	49	1	48	6	1	5
chr14	60430001	60431000	1000	*	3.93183e-07	0.000460942	28.2841	Distal Intergenic	14	60441937	60442665	729	1	Gm6066	Gm6066	-10937	NA	NA	NA	55	54	1	7	7	0	32	19	13	21	17	4	43	31	12
chr14	60735001	60736000	1000	*	1.01936e-06	0.000981769	-33.5623	Promoter (2-3kb)	14	60732904	60764556	31653	1	Spata13	NM_001310594.1	2097	XM_011245026.1;NM_001033272.2;XM_017315973.1;XM_011245025.1;XM_011245027.1;XM_006518870.2;XM_017315975.1;NM_001310594.1	Spata13;Spata13;Spata13;Spata13;Spata13;Spata13;Spata13;Spata13	0;0;0;0;0;0;0;0	10	7	3	44	20	24	83	65	18	7	7	0	45	43	2
chr14	61144001	61145000	1000	*	4.28757e-06	0.00292268	-39.5933	Intron (XM_006519226.1/Sacs, intron 1 of 10)	14	61138457	61240693	102237	1	Sacs	NM_172809.3	5544	XM_006519226.1;XM_006519228.1;NM_172809.3	Sacs;Sacs;Sacs	0;0;0	42	14	28	93	42	51	10	10	0	35	28	7	23	13	10
chr14	63230001	63231000	1000	*	2.08002e-05	0.0092012	25.9866	Intron (NM_001310610.1/Gata4, intron 2 of 6)	14	63198914	63245271	46358	2	Gata4	NM_001310610.1	14271	NM_001310610.1;NM_008092.4;XM_011244957.2;XM_011244956.2	Gata4;Gata4;Gata4;Gata4	0;0;0;0	5	5	0	43	43	0	29	25	4	15	11	4	16	10	6
chr14	63489001	63490000	1000	*	2.55267e-05	0.0105964	21.9589	Downstream (2-3kb)	14	63493993	63499868	5876	1	Gm17232	XR_874704.2	-3993	XR_874704.2;NM_021480.5	Gm17232;Tdh	-3993;19092	32	31	1	29	27	2	22	13	9	11	11	0	30	18	12
chr14	65506001	65507000	1000	*	1.32485e-05	0.00659786	-36.0909	Distal Intergenic	14	65465797	65467093	1297	1	9530047P18Rik	XR_383512.2	40204	NA	NA	NA	5	5	0	10	1	9	22	19	3	25	24	1	44	40	4
chr14	65834001	65835000	1000	*	1.32257e-05	0.00658978	67.9784	Promoter (<=1kb)	14	65819027	65833969	14943	2	Esco2	NM_028039.2	-32	NM_145944.4;NM_028039.2	Ccdc25;Esco2	-2302;-32	12	8	4	6	6	0	32	10	22	5	0	5	27	4	23
chr14	67247001	67248000	1000	*	8.6201e-08	0.000140164	29.3242	Exon (NM_001276387.1/Ebf2, exon 7 of 17)	14	67234600	67429777	195178	1	Ebf2	XM_011244945.2	12401	NM_001276387.1;NM_010095.6;XM_011244945.2	Ebf2;Ebf2;Ebf2	0;0;0	52	46	6	31	30	1	42	36	6	60	25	35	48	30	18
chr14	67714001	67715000	1000	*	5.63145e-07	0.000614787	26.2795	Promoter (<=1kb)	14	67676354	67715610	39257	2	Cdca2	NM_001110162.1	610	XM_006518420.3;XM_011244912.2;XM_011244913.2;NM_001110162.1;NM_175384.4;XM_011244915.2;XM_006518342.2;XM_006518343.2;NM_001111028.1;NM_001285933.1;NM_134073.2;XR_383124.3;XR_001781078.1	Cdca2;Cdca2;Cdca2;Cdca2;Cdca2;Cdca2;Kctd9;Kctd9;Kctd9;Kctd9;Kctd9;Kctd9;Kctd9	0;0;0;0;0;0;0;0;0;0;0;0;0	85	75	10	41	27	14	48	22	26	25	12	13	65	38	27
chr14	67717001	67718000	1000	*	1.88107e-06	0.00157411	-37.9379	Promoter (<=1kb)	14	67716199	67742309	26111	1	Kctd9	XR_001781078.1	802	XM_006518420.3;XM_011244912.2;XM_011244913.2;NM_001110162.1;NM_175384.4;XM_011244915.2;XM_006518342.2;XM_006518343.2;NM_001111028.1;NM_001285933.1;NM_134073.2;XR_383124.3;XR_001781078.1	Cdca2;Cdca2;Cdca2;Cdca2;Cdca2;Cdca2;Kctd9;Kctd9;Kctd9;Kctd9;Kctd9;Kctd9;Kctd9	0;0;0;0;0;0;0;0;0;0;0;0;0	11	5	6	67	30	37	35	31	4	34	24	10	10	9	1
chr14	68134001	68135000	1000	*	0.000143747	0.0337052	30.1076	Distal Intergenic	14	68119545	68125004	5460	2	Nefm	NM_008691.2	-8997	NR_045897.1	A230070E04Rik	10249	34	33	1	39	35	4	42	35	7	15	5	10	56	41	15
chr14	68144001	68145000	1000	*	5.09564e-06	0.00330629	25.3883	Distal Intergenic	14	68119545	68125004	5460	2	Nefm	NM_008691.2	-18997	NA	NA	NA	25	25	0	37	36	1	27	17	10	16	12	4	11	9	2
chr14	68339001	68340000	1000	*	1.72281e-05	0.00805806	-36.3044	Distal Intergenic	14	68436316	68496859	60544	1	Gm31227	XR_874755.1	-96316	NA	NA	NA	47	28	19	26	10	16	34	29	5	13	10	3	16	15	1
chr14	72341001	72342000	1000	*	2.03336e-07	0.000273077	-45.0431	Distal Intergenic	14	72431660	72461654	29995	2	LOC675947	XM_017316340.1	119654	NA	NA	NA	12	1	11	28	2	26	96	34	62	5	2	3	41	34	7
chr14	72533001	72534000	1000	*	2.17611e-05	0.00949439	-21.9399	Distal Intergenic	14	72472092	72491848	19757	2	Gm30500	XM_017316341.1	-41153	XM_006519118.3;XM_017316055.1;XM_006519116.3;XM_006519115.3;NM_207636.2	Fndc3a;Fndc3a;Fndc3a;Fndc3a;Fndc3a	69030;135419;175691;176683;176003	118	52	66	77	36	41	66	41	25	52	34	18	55	41	14
chr14	72725001	72726000	1000	*	1.76892e-05	0.00820699	22.3752	Distal Intergenic	14	72537948	72710683	172736	2	Fndc3a	XM_006519115.3	-14318	NA	NA	NA	72	66	6	113	84	29	60	26	34	71	52	19	98	64	34
chr14	72756001	72757000	1000	*	7.4529e-05	0.0220435	-28.284	Distal Intergenic	14	72537948	72710683	172736	2	Fndc3a	XM_006519115.3	-45318	NA	NA	NA	11	9	2	26	15	11	13	13	0	17	16	1	10	10	0
chr14	73524001	73525000	1000	*	1.60643e-08	3.77566e-05	-44.0152	Promoter (<=1kb)	14	73525319	73530442	5124	1	Gm41209	XR_874819.1	-319	XR_874819.1;XM_017315941.1;NM_172527.2	Gm41209;Nudt15;Nudt15	0;0;0	5	2	3	72	6	66	12	6	6	8	8	0	11	6	5
chr14	73525001	73526000	1000	*	9.69447e-05	0.0261646	-25.2155	Promoter (<=1kb)	14	73525319	73530442	5124	1	Gm41209	XR_874819.1	0	XR_874819.1;XM_017315941.1;NM_172527.2	Gm41209;Nudt15;Nudt15	0;0;0	63	4	59	22	0	22	121	22	99	28	18	10	37	1	36
chr14	75136001	75137000	1000	*	2.60141e-05	0.0107452	29.1385	Promoter (<=1kb)	14	75136425	75230842	94418	1	Lcp1	NM_008879.4	0	XR_383590.2;XM_006518704.1;NM_001247984.1;XM_006518701.3;XM_006518702.3;NM_008879.4;XM_006518703.3	Gm15628;Lcp1;Lcp1;Lcp1;Lcp1;Lcp1;Lcp1	0;0;0;0;0;0;0	29	24	5	114	31	83	19	13	6	11	1	10	68	0	68
chr14	76111001	76112000	1000	*	5.0917e-06	0.00330629	25.9385	Promoter (<=1kb)	14	76110891	76137379	26489	1	Nufip1	NM_013745.5	110	NM_026177.3;NM_013745.5;XM_006519072.1	Gpalpp1;Nufip1;Nufip1	-186;0;-2978	36	22	14	28	15	13	63	25	38	80	5	75	29	14	15
chr14	77016001	77017000	1000	*	1.48774e-07	0.00021345	-46.9048	Distal Intergenic	14	77024201	77036617	12417	2	Lacc1	NM_172488.2	19617	NA	NA	NA	35	15	20	30	17	13	30	27	3	10	10	0	6	6	0
chr14	77962001	77963000	1000	*	0.000248874	0.0470246	20.0186	Intron (NM_178825.4/Epsti1, intron 6 of 6)	14	77904252	78002648	98397	1	Epsti1	XM_017315795.1	57749	NM_178825.4;NM_029495.2;XM_017315797.1;XM_017315796.1;XM_011244910.2;XM_017315795.1	Epsti1;Epsti1;Epsti1;Epsti1;Epsti1;Epsti1	0;0;0;0;0;0	41	40	1	16	16	0	21	17	4	6	5	1	25	18	7
chr14	78097001	78098000	1000	*	1.05789e-08	2.66471e-05	45.2936	Distal Intergenic	14	78081024	78089007	7984	2	Fam216b	NM_177629.4	-7994	NA	NA	NA	61	47	14	49	35	14	23	4	19	18	2	16	24	14	10
chr14	78566001	78567000	1000	*	2.39343e-07	0.000311239	-34.1134	3' UTR	14	78492246	78536985	44740	2	Akap11	XM_006518901.3	-29016	XM_011245101.2;XM_011245100.2;NM_001253766.1;NM_001281794.1;NR_104044.1;NM_001081336.1;XM_006519171.3;XM_006519173.3;XM_006519172.3;XM_006519169.3;XM_011245099.2	Dgkh;Dgkh;Dgkh;Dgkh;Dgkh;Dgkh;Dgkh;Dgkh;Dgkh;Dgkh;Dgkh	0;0;62290;62290;77451;158089;69387;83468;83656;158988;166869	52	32	20	23	14	9	35	33	2	36	33	3	12	12	0
chr14	79212001	79213000	1000	*	3.12294e-05	0.0122516	42.2248	3' UTR	14	79178889	79199306	20418	2	Gm4632	XR_874843.1	-12695	NM_001033215.3	Zfp957	0	10	10	0	14	13	1	33	20	13	31	9	22	37	27	10
chr14	79267001	79268000	1000	*	4.19026e-12	2.85052e-08	-34.7631	Distal Intergenic	14	79212355	79247367	35013	2	Zfp957	NM_001033215.3	-19634	NA	NA	NA	11	8	3	71	41	30	29	29	0	35	35	0	5	5	0
chr14	81152001	81153000	1000	*	0.000218563	0.0434952	-20.696	Distal Intergenic	14	81684284	81721016	36733	1	Gm41219	XR_874866.1	-531284	NA	NA	NA	14	10	4	39	34	5	14	14	0	12	12	0	29	29	0
chr14	81199001	81200000	1000	*	0.000250841	0.047266	23.6111	Distal Intergenic	14	81684284	81721016	36733	1	Gm41219	XR_874866.1	-484284	NA	NA	NA	25	25	0	14	14	0	10	5	5	12	12	0	24	19	5
chr14	84469001	84470000	1000	*	2.49964e-05	0.0104413	-37.5241	Intron (NM_001013753.2/Pcdh17, intron 1 of 3)	14	84458838	84476424	17587	2	9630013A20Rik	NR_015539.1	6424	NR_015539.1;NM_001013753.2;XM_006518905.2;XM_006518907.2;XR_001781111.1;XM_006518906.3;XM_017315983.1	9630013A20Rik;Pcdh17;Pcdh17;Pcdh17;Pcdh17;Pcdh17;Pcdh17	0;0;0;0;0;0;0	22	8	14	21	0	21	35	16	19	15	10	5	95	52	43
chr14	84495001	84496000	1000	*	3.55772e-05	0.0134152	-38.1193	Intron (NM_001013753.2/Pcdh17, intron 3 of 3)	14	84458838	84476424	17587	2	9630013A20Rik	NR_015539.1	-18577	NM_001013753.2;XM_006518905.2;XR_001781111.1;XM_006518906.3;XM_017315983.1	Pcdh17;Pcdh17;Pcdh17;Pcdh17;Pcdh17	0;0;0;0;0	44	20	24	35	16	19	18	14	4	30	22	8	11	11	0
chr14	85585001	85586000	1000	*	1.35327e-06	0.00121807	-20.9678	Distal Intergenic	14	85478990	85479579	590	1	Gm9264	Gm9264	106011	NA	NA	NA	66	39	27	43	36	7	60	49	11	12	12	0	110	105	5
chr14	87315001	87316000	1000	*	4.61e-05	0.0159973	23.6715	Distal Intergenic	14	87412305	87545507	133203	1	Tdrd3	XM_006518911.3	-96305	NA	NA	NA	10	10	0	49	49	0	14	6	8	21	19	2	23	22	1
chr14	88982001	88983000	1000	*	1.57405e-06	0.00136755	24.9233	Distal Intergenic	14	88636049	88760924	124876	1	Gm41225	XR_874883.1	345952	NA	NA	NA	62	42	20	85	36	49	103	35	68	27	10	17	93	18	75
chr14	89768001	89769000	1000	*	1.36421e-05	0.00676589	-29.9714	Distal Intergenic	14	89896224	89899447	3224	1	Gm5088	NR_002862.3	-127224	NA	NA	NA	30	10	20	20	7	13	34	21	13	11	4	7	35	33	2
chr14	90676001	90677000	1000	*	0.000141613	0.0333207	40	Intron (XR_383679.3/Gm33246, intron 1 of 2)	14	90668343	90691501	23159	2	Gm33246	XR_383679.3	14501	XR_383679.3	Gm33246	0	16	16	0	6	6	0	15	10	5	6	2	4	5	4	1
chr14	90874001	90875000	1000	*	0.000102691	0.0270594	57.0833	Distal Intergenic	14	90668343	90691501	23159	2	Gm33246	XR_383679.3	-182500	NA	NA	NA	5	3	2	10	8	2	16	3	13	15	3	12	5	0	5
chr14	91056001	91057000	1000	*	4.26328e-06	0.00291407	32.3845	Distal Intergenic	14	90668343	90691501	23159	2	Gm33246	XR_383679.3	-364500	NA	NA	NA	17	14	3	58	39	19	15	9	6	50	11	39	42	19	23
chr14	91350001	91351000	1000	*	0.000187454	0.0396644	53.3854	Distal Intergenic	14	90668343	90691501	23159	2	Gm33246	XR_383679.3	-658500	NA	NA	NA	6	6	0	14	9	5	10	3	7	45	5	40	62	28	34
chr14	91662001	91663000	1000	*	0.000174354	0.0379361	44.9619	Distal Intergenic	14	92602373	92604476	2104	2	Gm7232	Gm7232	941476	NA	NA	NA	9	9	0	5	5	0	9	5	4	8	5	3	17	8	9
chr14	93058001	93059000	1000	*	2.43686e-05	0.0102516	51.7861	Intron (NM_001081377.2/Pcdh9, intron 3 of 3)	14	93194186	93195794	1609	2	Gm9247	Gm9247	136794	NM_001081377.2;NM_001271800.1;NM_001271798.1;NM_001271799.1;XM_006518775.3;XM_006518776.3;XM_006518774.3;XM_006518777.3	Pcdh9;Pcdh9;Pcdh9;Pcdh9;Pcdh9;Pcdh9;Pcdh9;Pcdh9	0;0;0;0;0;0;0;0	15	11	4	23	20	3	23	9	14	5	0	5	37	17	20
chr14	93093001	93094000	1000	*	2.20842e-05	0.00958102	29.2361	Intron (NM_001081377.2/Pcdh9, intron 3 of 3)	14	93194186	93195794	1609	2	Gm9247	Gm9247	101794	NM_001081377.2;NM_001271800.1;NM_001271798.1;NM_001271799.1;XM_006518775.3;XM_006518776.3;XM_006518774.3;XM_006518777.3	Pcdh9;Pcdh9;Pcdh9;Pcdh9;Pcdh9;Pcdh9;Pcdh9;Pcdh9	0;0;0;0;0;0;0;0	21	21	0	12	12	0	32	21	11	6	4	2	10	8	2
chr14	93930001	93931000	1000	*	1.31176e-05	0.00655551	-21.9897	Distal Intergenic	14	93013701	93890724	877024	2	Pcdh9	XM_006518777.3	-39277	NA	NA	NA	58	37	21	72	41	31	52	41	11	24	19	5	64	57	7
chr14	95324001	95325000	1000	*	3.10798e-05	0.0121977	-30.8822	Distal Intergenic	14	95419694	95421490	1797	1	Gm5207	Gm5207	-94694	NA	NA	NA	16	13	3	17	8	9	29	26	3	30	30	0	22	21	1
chr14	95498001	95499000	1000	*	0.000263478	0.048702	-32.3864	Distal Intergenic	14	95419694	95421490	1797	1	Gm5207	Gm5207	78307	NA	NA	NA	12	7	5	33	22	11	16	15	1	11	10	1	13	13	0
chr14	96683001	96684000	1000	*	1.00761e-05	0.00545836	-34.2115	Distal Intergenic	14	96105265	96519034	413770	2	Klhl1	NM_053105.2	-163967	NA	NA	NA	11	6	5	11	8	3	65	64	1	5	5	0	61	58	3
chr14	97902001	97903000	1000	*	1.99752e-05	0.00891353	43.8329	Intron (NM_001038610.2/Dach1, intron 5 of 10)	14	97786846	98169765	382920	2	Dach1	NM_001038610.2	266765	NM_001038610.2;NM_007826.3	Dach1;Dach1	0;0	18	17	1	5	2	3	7	1	6	17	1	16	28	14	14
chr14	98957001	98958000	1000	*	8.19661e-06	0.00468231	25.5451	Intron (XR_874888.1/Gm41228, intron 1 of 2)	14	98922573	98923538	966	1	Gm18148	Gm18148	34428	XR_874888.1	Gm41228	0	41	27	14	104	39	65	29	9	20	62	4	58	22	9	13
chr14	98959001	98960000	1000	*	1.02807e-06	0.000986633	-31.7972	Intron (XR_874888.1/Gm41228, intron 1 of 2)	14	98993870	98994349	480	2	Rpl36a-ps1	Rpl36a-ps1	34349	XR_874888.1	Gm41228	0	52	15	37	93	23	70	22	8	14	33	22	11	22	16	6
chr14	99365001	99366000	1000	*	4.63057e-06	0.00310152	23.8555	Distal Intergenic	14	99298691	99313412	14722	1	Klf5	NM_009769.4	66310	NA	NA	NA	83	56	27	86	62	24	87	40	47	90	28	62	145	88	57
chr14	99535001	99536000	1000	*	0.000132404	0.0318429	21.6048	Intron (XR_001781411.1/Gm41230, intron 1 of 2)	14	99522545	99577054	54510	1	Gm41230	XR_874890.1	12456	XR_001781411.1;XR_874890.1	Gm41230;Gm41230	0;0	38	33	5	65	63	2	15	11	4	32	28	4	24	12	12
chr14	103350001	103351000	1000	*	1.99388e-05	0.00890731	36.5824	Intron (XR_001781428.1/1700087I21Rik, intron 1 of 2)	14	103346942	103443597	96656	1	1700087I21Rik	XR_001781434.1	3059	XR_001781428.1;XR_001781425.1;XR_001781427.1;XR_001781426.1;XR_001781429.1;XR_001781430.1;XR_001781431.1;XR_001781434.1;XR_383706.1;XM_011244893.2;XM_011244894.2;XM_017315777.1;XM_017315794.1;NM_207215.2;XM_011244906.2;XM_006518392.2;XM_011244895.2;XM_011244896.2;XM_011244897.2;XM_011244898.2;XM_011244899.2;XM_011244900.2;XM_011244901.2;XM_011244902.2;XM_011244903.2;XM_011244904.2;XM_011244905.2;…	1700087I21Rik;1700087I21Rik;1700087I21Rik;1700087I21Rik;1700087I21Rik;1700087I21Rik;1700087I21Rik;1700087I21Rik;1700087I21Rik;Mycbp2;Mycbp2;Mycbp2;Mycbp2;Mycbp2;Mycbp2;Mycbp2;Mycbp2;Mycbp2;Mycbp2;Mycbp2;Mycbp2;Mycbp2;Mycbp2;Mycbp2;Mycbp2;Mycbp2;Mycbp2;Mycbp2;Mycbp2;Mycbp2;Mycbp2;Mycbp2;Mycbp2;Mycbp2;Mycbp2;Mycbp2;Mycbp2;Mycbp2;Mycbp2;Mycbp2;Mycbp2;Mycbp2	0;0;0;0;0;0;0;0;-3988;-3406;-3406;-3406;-3406;-3201;-3484;-3406;-3406;-3406;-3406;-3406;-3406;-3406;-3406;-3406;-3406;-3406;-3406;-3406;-3406;-3406;-3406;-3406;-3406;-3406;-3406;-3406;-3406;-3406;-3406;-3406;-3406;-3406	22	10	12	54	27	27	47	9	38	21	3	18	5	0	5
chr14	103520001	103521000	1000	*	4.14234e-05	0.0148951	-25.2913	Promoter (<=1kb)	14	103519987	103613346	93360	1	Scel	XM_006519355.3	14	XM_006519356.3;NM_022886.2;XM_006519355.3	Scel;Scel;Scel	0;0;0	32	14	18	23	21	2	41	39	2	17	17	0	42	35	7
chr14	103654001	103655000	1000	*	9.25246e-06	0.00513455	24.9083	Intron (XM_006518339.3/Slain1, intron 1 of 7)	14	103650243	103704802	54560	1	Slain1	NM_198014.2	3758	XM_006518339.3;NM_198014.2	Slain1;Slain1	0;0	25	25	0	29	28	1	50	46	4	39	25	14	50	32	18
chr14	103721001	103722000	1000	*	0.000179468	0.0386203	-24.6169	Promoter (1-2kb)	14	103719026	103867713	148688	1	Gm35197	XR_383715.2	1975	XR_383715.2	Gm35197	0	71	33	38	44	25	19	40	29	11	30	18	12	27	26	1
chr14	104364001	104365000	1000	*	3.55773e-06	0.0025669	38.7251	Intron (XR_383722.2/D130079A08Rik, intron 1 of 4)	14	104289915	104313477	23563	2	D130079A08Rik	XR_874929.1	-50524	XR_383722.2;XR_874930.1	D130079A08Rik;D130079A08Rik	0;0	65	42	23	21	13	8	11	4	7	5	1	4	29	5	24
chr14	104936001	104937000	1000	*	5.12624e-11	2.64239e-07	-66.7159	Exon (NR_015593.2/D130009I18Rik, exon 4 of 6)	14	105106728	105114676	7949	2	Gm17066	NR_040628.1	177676	NR_015593.2	D130009I18Rik	0	43	2	41	41	11	30	16	16	0	10	10	0	57	27	30
chr14	105324001	105325000	1000	*	2.82089e-05	0.0113929	-58.3187	Distal Intergenic	14	105258673	105309298	50626	1	Ndfip2	NM_029561.4	65328	NA	NA	NA	10	3	7	36	11	25	5	5	0	5	5	0	38	25	13
chr14	105682001	105683000	1000	*	5.27187e-06	0.00339529	31.4364	Promoter (<=1kb)	14	105681826	105682219	394	1	Gm10076	Gm10076	175	Gm10076;XR_383731.3;XR_874933.2;XR_874934.2	Gm10076;Gm35967;Gm35967;Gm35967	0;14704;14704;45364	20	18	2	17	13	4	36	22	14	57	0	57	35	33	2
chr14	105815001	105816000	1000	*	4.70852e-13	4.02438e-09	63.1235	Distal Intergenic	14	105822646	105829650	7005	1	Gm41239	XR_874935.1	-6646	NA	NA	NA	15	10	5	10	10	0	22	13	9	65	1	64	55	0	55
chr14	105861001	105862000	1000	*	7.97014e-06	0.00457528	-34.405	Distal Intergenic	14	105891947	105896166	4220	2	Spry2	XM_006519016.3	34166	NA	NA	NA	40	11	29	64	29	35	54	35	19	21	17	4	39	26	13
chr14	109277001	109278000	1000	*	3.45139e-06	0.00250828	27.9083	Distal Intergenic	14	109328711	109509481	180771	1	Gm30216	XR_874946.1	-50711	NA	NA	NA	68	38	30	58	29	29	45	12	33	42	6	36	41	14	27
chr14	109843001	109844000	1000	*	1.41544e-05	0.00694865	21.3547	Distal Intergenic	14	109566618	109567090	473	1	Gm7313	Gm7313	276383	NA	NA	NA	56	54	2	57	51	6	57	46	11	39	24	15	51	37	14
chr14	110101001	110102000	1000	*	2.23494e-05	0.00965419	25.5134	Distal Intergenic	14	109566618	109567090	473	1	Gm7313	Gm7313	534383	NA	NA	NA	39	36	3	34	32	2	11	7	4	52	33	19	25	19	6
chr14	110205001	110206000	1000	*	0.000206862	0.0421794	-25.1635	Distal Intergenic	14	110748578	110755149	6572	2	Slitrk6	NM_175499.4	549149	NA	NA	NA	57	39	18	34	18	16	23	20	3	37	32	5	44	37	7
chr14	110260001	110261000	1000	*	1.18392e-05	0.00611843	-21.2791	Distal Intergenic	14	110748578	110755149	6572	2	Slitrk6	NM_175499.4	494149	NA	NA	NA	8	4	4	43	29	14	38	38	0	22	22	0	5	2	3
chr14	110374001	110375000	1000	*	1.42429e-05	0.00698869	-41.3612	Distal Intergenic	14	110748578	110755149	6572	2	Slitrk6	NM_175499.4	380149	NA	NA	NA	9	5	4	17	10	7	10	10	0	10	10	0	23	22	1
chr14	111515001	111516000	1000	*	2.56071e-05	0.0106166	-23.0291	Intron (XR_001781439.1/Gm30439, intron 4 of 9)	14	111440591	111674998	234408	2	Gm30439	XR_001781439.1	158998	XR_001781439.1;XR_001781440.1;XR_001781441.1;XR_001781442.1;XR_001781444.1;XR_001781447.1;XR_001781451.1;XR_001781452.1;XR_001781457.1;XR_383736.3;XR_001781445.1;XR_001781449.1;XR_001781453.1;XR_001781443.1;XR_001781446.1;XR_001781454.1;XR_001781450.1;XR_001781458.1	Gm30439;Gm30439;Gm30439;Gm30439;Gm30439;Gm30439;Gm30439;Gm30439;Gm30439;Gm30439;Gm30439;Gm30439;Gm30439;Gm30439;Gm30439;Gm30439;Gm30439;Gm30439	0;0;0;0;0;0;0;0;0;0;0;0;0;0;0;0;0;0	61	41	20	90	64	26	8	8	0	68	64	4	57	47	10
chr14	112323001	112324000	1000	*	0.000124274	0.0305226	23.5228	Distal Intergenic	14	112327946	112331454	3509	2	LOC102632761	LOC102632761	7454	LOC102632761	LOC102632761	7454	37	34	3	26	25	1	15	11	4	43	24	19	51	42	9
chr14	115078001	115079000	1000	*	8.55687e-05	0.0240458	32.6981	Distal Intergenic	14	115092212	115418165	325954	1	Gpc5	XM_006518322.3	-13212	NA	NA	NA	71	59	12	96	70	26	29	15	14	16	3	13	55	36	19
chr14	115100001	115101000	1000	*	3.77492e-05	0.0139657	48.6215	Intron (XM_006518322.3/Gpc5, intron 1 of 4)	14	115092215	116525192	1432978	1	Gpc5	NM_175500.4	7786	XM_006518322.3;XM_011244875.1;XM_011244876.2;XM_006518320.3;XM_006518321.2;XM_017315745.1;NM_175500.4	Gpc5;Gpc5;Gpc5;Gpc5;Gpc5;Gpc5;Gpc5	0;0;0;0;0;0;0	18	13	5	34	23	11	5	1	4	6	1	5	22	6	16
chr14	115393001	115394000	1000	*	6.54557e-05	0.0201899	26.3861	Intron (XM_006518322.3/Gpc5, intron 3 of 4)	14	115396551	115409552	13002	2	4930505G20Rik	NR_045761.1	15552	NR_045761.1;XM_006518322.3;XM_011244875.1;XM_011244876.2;XM_006518320.3;XM_006518321.2;XM_017315745.1;NM_175500.4	4930505G20Rik;Gpc5;Gpc5;Gpc5;Gpc5;Gpc5;Gpc5;Gpc5	15552;0;0;0;0;0;0;0	48	37	11	32	30	2	67	36	31	46	24	22	59	42	17
chr14	118050001	118051000	1000	*	9.15377e-07	0.000905417	28.3088	Promoter (1-2kb)	14	118012790	118052246	39457	2	Dct	NM_010024.3	1246	NM_010024.3	Dct	0	11	5	6	46	41	5	30	12	18	38	5	33	58	37	21
chr14	118182001	118183000	1000	*	2.31605e-05	0.00988473	-26.4344	Promoter (<=1kb)	14	118181507	118182129	623	2	Gm4674	Gm4674	0	Gm4674	Gm4674	0	11	8	3	42	27	15	47	43	4	21	21	0	15	14	1
chr14	118256001	118257000	1000	*	0.00016978	0.0373011	-29.1426	Promoter (1-2kb)	14	118258634	118258736	103	1	Mir6241	NR_105749.1	-1634	NR_131969.1;NR_105749.1;NA	LOC105245869;Mir6241;Mir6241	0;-1634;-1659	42	31	11	11	6	5	28	28	0	27	24	3	56	51	5
chr14	118438001	118439000	1000	*	7.69088e-07	0.000794512	32.8464	Distal Intergenic	14	118365878	118398165	32288	1	1700044C05Rik	NR_045624.1	72123	NA	NA	NA	21	21	0	30	23	7	97	37	60	23	13	10	39	28	11
chr14	118586001	118587000	1000	*	3.10766e-05	0.0121977	30.3245	Intron (NM_001163675.1/Abcc4, intron 19 of 30)	14	118592376	118592396	21	2	Mir6391	NA	5396	NM_001163675.1;NM_001033336.3;NM_001163676.1	Abcc4;Abcc4;Abcc4	0;0;0	33	30	3	26	21	5	51	35	16	26	13	13	48	23	25
chr14	118895001	118896000	1000	*	0.000151688	0.034775	-27.859	Exon (XR_383203.3/Dzip1, exon 14 of 24)	14	118876253	118916070	39818	2	Dzip1	XM_006519389.3	20070	XR_383203.3;NR_130725.1;NM_025943.3;XM_006519389.3;XM_006519391.3;XM_011245147.2;XM_006519388.3;XM_017316127.1;XM_006519383.2;XM_006519384.2;XM_006519386.2;XM_006519387.2;XM_017316126.1;XM_011245146.2	Dzip1;Dzip1;Dzip1;Dzip1;Dzip1;Dzip1;Dzip1;Dzip1;Dzip1;Dzip1;Dzip1;Dzip1;Dzip1;Dzip1	0;0;0;0;0;0;0;0;0;0;0;0;0;0	10	6	4	44	25	19	23	21	2	32	28	4	10	8	2
chr14	119264001	119265000	1000	*	2.41494e-08	5.29591e-05	-23.3369	Intron (XM_011245113.2/Hs6st3, intron 1 of 1)	14	119278284	119280889	2606	1	Gm6087	Gm6087	-13284	XM_011245113.2;XM_006519238.3;NM_015820.3	Hs6st3;Hs6st3;Hs6st3	0;0;0	93	48	45	79	47	32	95	80	15	115	80	35	152	126	26
chr14	119705001	119706000	1000	*	1.05498e-05	0.00563557	-24.663	Intron (XM_011245113.2/Hs6st3, intron 1 of 1)	14	119749227	119751564	2338	1	1700006F04Rik	NR_045621.1	-43227	XM_011245113.2;NM_015820.3	Hs6st3;Hs6st3	0;0	5	4	1	47	26	21	32	27	5	27	25	2	17	17	0
chr14	119752001	119753000	1000	*	2.87806e-06	0.00218864	-27.1006	Promoter (2-3kb)	14	119749227	119751564	2338	1	1700006F04Rik	NR_045621.1	2774	NR_045621.1;NM_015820.3	1700006F04Rik;Hs6st3	2774;0	40	27	13	39	22	17	23	20	3	19	16	3	50	48	2
chr14	119753001	119754000	1000	*	7.81623e-07	0.000802488	-26.1479	Intron (NM_015820.3/Hs6st3, intron 1 of 1)	14	119749227	119751564	2338	1	1700006F04Rik	NR_045621.1	3774	NR_045621.1;NM_015820.3	1700006F04Rik;Hs6st3	3774;0	51	4	47	48	3	45	6	2	4	16	3	13	40	19	21
chr14	119896001	119897000	1000	*	3.57529e-05	0.0134663	21.4913	Distal Intergenic	14	119796033	119798983	2951	2	Gm41249	XR_001781465.1	-97018	NA	NA	NA	10	10	0	34	32	2	56	41	15	6	6	0	43	23	20
chr14	120138001	120139000	1000	*	2.99762e-09	9.48613e-06	-23.483	Intron (XR_001781467.1/Gm4681, intron 1 of 6)	14	120089943	120142165	52223	2	Gm4681	XR_001781467.1	3165	XR_001781467.1;XR_001781468.1;XR_001781469.1	Gm4681;Gm4681;Gm4681	0;0;0	73	11	62	154	6	148	62	15	47	77	11	66	48	29	19
chr14	120149001	120150000	1000	*	4.22313e-07	0.000489923	-22.0921	Distal Intergenic	14	120153164	120172080	18917	1	Gm41250	XR_874975.1	-3164	XR_874975.1	Gm41250	-3164	53	20	33	89	18	71	97	47	50	90	23	67	101	80	21
chr14	120962001	120963000	1000	*	3.95015e-12	2.72228e-08	38.3132	Distal Intergenic	14	120913799	120947999	34201	1	Ipo5	XM_006519539.2	48202	NA	NA	NA	51	35	16	34	30	4	33	9	24	106	28	78	15	10	5
chr14	121129001	121130000	1000	*	0.000171226	0.0374774	23.5673	Intron (XM_006518914.3/Farp1, intron 2 of 26)	14	121035846	121283744	247899	1	Farp1	XM_006518915.2	93155	XM_006518914.3;NM_134082.3;XM_006518915.2	Farp1;Farp1;Farp1	0;0;0	57	56	1	15	14	1	6	3	3	10	10	0	21	14	7
chr14	121441001	121442000	1000	*	2.84974e-05	0.0114678	44.0716	Downstream (2-3kb)	14	121444657	121456891	12235	2	Gm33299	XR_383790.2	14891	XR_383790.2	Gm33299	14891	41	22	19	15	12	3	31	5	26	11	2	9	53	18	35
chr14	122176001	122177000	1000	*	0.000183723	0.0391873	-21.1934	Intron (XM_011245173.2/Clybl, intron 1 of 7)	14	122181687	122401934	220248	1	Clybl	XM_011245172.2	-4687	XM_011245173.2;XM_011245172.2;NM_029556.3	Clybl;Clybl;Clybl	0;-4687;-4694	5	3	2	39	13	26	81	56	25	36	22	14	30	22	8
chr14	122466001	122467000	1000	*	4.95519e-07	0.000553035	-36.1538	Promoter (<=1kb)	14	122459160	122465658	6499	2	Zic5	NM_022987.3	-343	NR_045046.1;XR_383797.2;XR_001781476.1;NM_022987.3;XM_006519357.3	2610035F20Rik;Gm33719;Gm33719;Zic5;Zic5	8199;0;0;-343;-535	29	0	29	20	2	18	26	10	16	26	13	13	20	7	13
chr14	123856001	123857000	1000	*	7.23089e-05	0.0215976	-21.4835	Intron (XM_006518921.3/Itgbl1, intron 5 of 9)	14	123983974	123986711	2738	2	Gm15422	Gm15422	129711	XM_006518921.3;NM_145467.2	Itgbl1;Itgbl1	0;0	6	5	1	35	24	11	20	20	0	26	24	2	21	21	0
chr15	5090001	5091000	1000	*	2.07044e-10	9.31797e-07	-20.8309	Distal Intergenic	15	5097439	5108533	11095	2	Card6	NM_001163138.1	17533	NA	NA	NA	156	82	74	200	110	90	191	142	49	177	144	33	204	139	65
chr15	5464001	5465000	1000	*	1.36468e-05	0.00676589	-39.2441	Exon (LOC108168213/LOC108168213, exon 3 of 4)	15	5496318	5594983	98666	1	5430437J10Rik	NR_045274.1	-31318	LOC108168213	LOC108168213	0	23	6	17	17	3	14	42	28	14	6	3	3	18	12	6
chr15	8451001	8452000	1000	*	0.000153804	0.0350537	-20.4901	Promoter (1-2kb)	15	8290306	8453917	163612	2	Nipbl	XM_017316745.1	1917	XM_017316745.1;XM_006519994.3;XM_006519995.2	Nipbl;Nipbl;Nipbl	0;0;0	63	30	33	47	17	30	45	34	11	22	9	13	58	41	17
chr15	10469001	10470000	1000	*	3.10013e-07	0.000385588	-32.1032	Promoter (<=1kb)	15	10446763	10470516	23754	2	Dnajc21	NM_030046.2	516	NM_026396.3;NM_030046.2;XM_017316801.1	Brix1;Dnajc21;Dnajc21	15937;0;0	80	8	72	21	9	12	42	16	26	40	23	17	10	8	2
chr15	10696001	10697000	1000	*	3.57682e-05	0.0134669	25.2525	Intron (XM_017316775.1/Rai14, intron 1 of 17)	15	10568978	10713540	144563	2	Rai14	NM_030690.3	16540	XM_017316775.1;XM_017316776.1;XM_006520190.2;XM_006520192.2;XM_006520188.3;XM_006520187.2;NM_030690.3;NM_001166408.1	Rai14;Rai14;Rai14;Rai14;Rai14;Rai14;Rai14;Rai14	0;0;0;0;0;0;0;0	46	46	0	10	10	0	6	5	1	22	20	2	12	6	6
chr15	13735001	13736000	1000	*	1.54286e-05	0.0074069	-31.9021	Distal Intergenic	15	13418378	13418911	534	2	Gm8238	Gm8238	-316090	NA	NA	NA	54	16	38	75	35	40	61	39	22	5	4	1	74	49	25
chr15	14110001	14111000	1000	*	0.000141275	0.0332647	-25.1748	Distal Intergenic	15	14465784	14466669	886	1	Gm9630	Gm9630	-354784	NA	NA	NA	13	10	3	11	8	3	19	19	0	13	13	0	17	17	0
chr15	14334001	14335000	1000	*	7.10229e-05	0.0213785	-34.3766	Distal Intergenic	15	14465784	14466669	886	1	Gm9630	Gm9630	-130784	NA	NA	NA	12	6	6	24	13	11	30	27	3	24	20	4	43	37	6
chr15	15833001	15834000	1000	*	0.000180695	0.0388007	22.1678	Distal Intergenic	15	15778114	15814864	36751	1	LOC102638878	XR_383847.1	54887	NA	NA	NA	12	3	9	83	44	39	17	2	15	16	3	13	5	1	4
chr15	16276001	16277000	1000	*	0.000213191	0.0428501	-23.7274	Promoter (<=1kb)	15	16275950	16276023	74	2	n-TNgtt2	rna86043	0	rna86043	n-TNgtt2	0	57	28	29	68	50	18	55	36	19	24	24	0	68	61	7
chr15	17778001	17779000	1000	*	0.000240031	0.0460612	-33.3882	Distal Intergenic	15	18057962	18064083	6122	2	Gm41277	XR_875052.1	285083	NA	NA	NA	24	22	2	12	4	8	31	30	1	23	22	1	42	40	2
chr15	17964001	17965000	1000	*	5.37659e-06	0.00344432	25.5385	Distal Intergenic	15	18057962	18064083	6122	2	Gm41277	XR_875052.1	99083	NA	NA	NA	33	33	0	49	47	2	24	16	8	14	10	4	24	19	5
chr15	18870001	18871000	1000	*	4.12381e-06	0.00285344	25.7262	Intron (XM_006520100.3/Cdh10, intron 1 of 11)	15	18820329	19014236	193908	1	Cdh10	NM_009865.3	49672	XM_006520100.3;NM_001316758.1;NM_009865.3	Cdh10;Cdh10;Cdh10	0;0;0	71	71	0	36	33	3	25	22	3	14	11	3	16	7	9
chr15	21240001	21241000	1000	*	2.24723e-07	0.00029686	-46.3878	Promoter (2-3kb)	15	21237822	21598421	360600	1	Cdh12	XM_017316547.1	2179	XM_011245341.2;XM_011245342.2;XM_011245344.2;XM_011245345.2;XM_017316546.1;XM_011245343.2;XM_017316545.1;XM_011245347.2;NM_001008420.2;XM_017316547.1	Cdh12;Cdh12;Cdh12;Cdh12;Cdh12;Cdh12;Cdh12;Cdh12;Cdh12;Cdh12	0;0;0;0;0;0;0;0;0;0	40	12	28	48	6	42	65	42	23	5	5	0	47	18	29
chr15	21391001	21392000	1000	*	7.38348e-06	0.00431782	-39.0858	Intron (XM_011245341.2/Cdh12, intron 5 of 13)	15	21237822	21598421	360600	1	Cdh12	XM_017316547.1	153179	XM_011245341.2;XM_011245342.2;XM_011245344.2;XM_011245345.2;XM_017316546.1;XM_011245343.2;XM_017316545.1;XM_011245347.2;NM_001008420.2;XM_017316547.1	Cdh12;Cdh12;Cdh12;Cdh12;Cdh12;Cdh12;Cdh12;Cdh12;Cdh12;Cdh12	0;0;0;0;0;0;0;0;0;0	23	7	16	46	15	31	29	20	9	12	9	3	28	19	9
chr15	21532001	21533000	1000	*	8.78823e-05	0.024497	-27.7159	Intron (XM_011245341.2/Cdh12, intron 8 of 13)	15	21237822	21598421	360600	1	Cdh12	XM_017316547.1	294179	XM_011245341.2;XM_011245342.2;XM_011245344.2;XM_011245345.2;XM_017316546.1;XM_011245343.2;XM_017316545.1;XM_011245347.2;NM_001008420.2;XM_017316547.1	Cdh12;Cdh12;Cdh12;Cdh12;Cdh12;Cdh12;Cdh12;Cdh12;Cdh12;Cdh12	0;0;0;0;0;0;0;0;0;0	30	17	13	26	18	8	41	37	4	25	22	3	16	15	1
chr15	21712001	21713000	1000	*	2.09612e-05	0.00925033	-29.5412	Distal Intergenic	15	21998357	22000400	2044	2	Gm41278	XR_875057.1	287400	NA	NA	NA	31	8	23	20	4	16	30	19	11	10	3	7	50	32	18
chr15	22913001	22914000	1000	*	4.77552e-08	9.0082e-05	21.2583	Intron (XM_006520095.3/Cdh18, intron 3 of 13)	15	22906630	22937261	30632	1	Gm19840	Gm19840	6371	XM_006520095.3;XM_006520097.3;XM_006520098.3;XM_006520094.3;XM_006520096.3;XM_011245360.2;Gm19840	Cdh18;Cdh18;Cdh18;Cdh18;Cdh18;Cdh18;Gm19840	0;0;0;0;0;0;0	52	51	1	7	6	1	20	19	1	48	30	18	68	37	31
chr15	23474001	23475000	1000	*	6.56797e-05	0.020234	-27.904	3' UTR	15	23489876	23490501	626	1	Gm6533	Gm6533	-14876	XM_006520095.3;XM_006520097.3;XM_006520098.3;XM_006520094.3;XM_006520096.3;XM_011245360.2;NM_001081299.1	Cdh18;Cdh18;Cdh18;Cdh18;Cdh18;Cdh18;Cdh18	0;0;0;0;0;0;0	5	0	5	36	5	31	36	12	24	6	1	5	66	36	30
chr15	24949001	24950000	1000	*	4.58251e-06	0.00307716	-27.7248	Distal Intergenic	15	24978421	24985826	7406	2	Gm2824	XR_383856.3	35826	NA	NA	NA	57	12	45	65	21	44	74	41	33	21	5	16	25	21	4
chr15	24992001	24993000	1000	*	0.000159544	0.0359171	-26.7075	Intron (XR_001781655.1/Gm2824, intron 3 of 4)	15	24978421	24985826	7406	2	Gm2824	XR_383856.3	-6175	XR_001781655.1;XR_001781656.1	Gm2824;Gm2824	0;0	37	15	22	65	29	36	38	26	12	18	13	5	61	41	20
chr15	25018001	25019000	1000	*	1.45461e-05	0.00710607	-32.6872	Promoter (<=1kb)	15	24989286	25018491	29206	2	Gm2824	XR_001781656.1	0	XR_001781655.1;XR_001781656.1;XR_875062.1;XR_001781651.1;XR_001781652.1;XR_001781653.1;XR_001781654.1;XR_875061.2;XR_875063.2;XR_875058.2	Gm2824;Gm2824;Gm2824;Gm2824;Gm2824;Gm2824;Gm2824;Gm2824;Gm2824;Gm2824	0;0;0;0;0;0;0;0;0;0	34	16	18	33	22	11	23	17	6	10	10	0	38	36	2
chr15	25235001	25236000	1000	*	2.04053e-05	0.00906095	-30.8596	Distal Intergenic	15	25104800	25179393	74594	2	Gm35996	XR_875072.1	-55608	NA	NA	NA	18	9	9	36	11	25	23	9	14	17	15	2	43	37	6
chr15	25536001	25537000	1000	*	0.000114495	0.0290255	-37.8889	Distal Intergenic	15	25622550	25813671	191122	1	Myo10	NM_019472.2	-85550	NA	NA	NA	15	0	15	54	9	45	5	3	2	10	4	6	75	29	46
chr15	25615001	25616000	1000	*	2.84248e-05	0.0114484	-31.4715	Distal Intergenic	15	25622550	25813671	191122	1	Myo10	NM_019472.2	-6550	NA	NA	NA	10	3	7	99	32	67	22	13	9	17	11	6	39	25	14
chr15	26299001	26300000	1000	*	0.000242591	0.0463579	-25	Distal Intergenic	15	26309048	26409586	100539	1	March11	NM_001310774.1	-9048	NA	NA	NA	24	12	12	5	5	0	7	7	0	5	5	0	5	5	0
chr15	26542001	26543000	1000	*	6.32252e-05	0.019714	44.6573	3' UTR	15	26540454	26570828	30375	2	Fbxl7	XM_006520106.3	27828	XM_006520106.3;NM_176959.3	Fbxl7;Fbxl7	0;0	60	36	24	16	13	3	31	4	27	6	0	6	20	13	7
chr15	27125001	27126000	1000	*	4.01927e-09	1.19266e-05	44.4971	Distal Intergenic	15	27025302	27026257	956	1	Gm6576	Gm6576	99699	NA	NA	NA	57	40	17	33	27	6	28	16	12	30	5	25	29	6	23
chr15	28182001	28183000	1000	*	1.65796e-06	0.00142192	73.7879	Intron (XM_006520014.2/Dnah5, intron 1 of 78)	15	28203766	28472045	268280	1	Dnah5	NM_133365.3	-20766	XM_006520014.2	Dnah5	0	5	5	0	10	9	1	14	0	14	11	7	4	6	0	6
chr15	29386001	29387000	1000	*	0.000271494	0.0495518	38.9502	Distal Intergenic	15	29372467	29375533	3067	2	Gm41281	XR_875093.1	-10468	NA	NA	NA	16	15	1	6	6	0	19	10	9	25	16	9	28	16	12
chr15	29687001	29688000	1000	*	0.000187069	0.0396285	-21.7391	Distal Intergenic	15	29713337	29713356	20	2	Mir3964	NA	25356	NA	NA	NA	23	13	10	8	8	0	6	6	0	8	8	0	12	12	0
chr15	30231001	30232000	1000	*	2.53109e-05	0.0105374	-42.7108	Intron (NM_008729.2/Ctnnd2, intron 1 of 22)	15	30173194	30186824	13631	1	Gm31953	XR_875097.2	57807	NM_008729.2;XM_006520032.3	Ctnnd2;Ctnnd2	0;0	13	3	10	9	3	6	33	27	6	48	37	11	13	7	6
chr15	31140001	31141000	1000	*	1.1449e-06	0.00107534	-25.1905	Distal Intergenic	15	31131006	31135849	4844	2	Gm32070	XR_875098.1	-4152	XR_383901.2;XR_875098.1	Gm32070;Gm32070	-4152;-4152	32	17	15	25	20	5	47	42	5	36	33	3	104	98	6
chr15	35325001	35326000	1000	*	9.17889e-15	1.03134e-10	-65.1879	Promoter (2-3kb)	15	35307010	35328535	21526	2	BC048602	NR_045280.1	2535	NR_045280.1;XR_383923.3;XR_383924.3	BC048602;Gm33584;Gm33584	0;-2990;-2993	83	27	56	5	0	5	39	37	2	15	8	7	26	25	1
chr15	35664001	35665000	1000	*	8.67413e-06	0.00489211	-20.8242	Promoter (2-3kb)	15	35660970	35661047	78	2	Mir875	NR_030606.1	-2954	NR_035527.1;NA;NR_030606.1;NA;NA;XM_006520141.3;XM_006520142.3;XM_006520138.3;NM_177151.3;XM_006520139.3;XM_006520140.3	Mir599;Mir599;Mir875;Mir875;Mir875;Vps13b;Vps13b;Vps13b;Vps13b;Vps13b;Vps13b	-3083;-3137;-2954;-2999;-2964;0;0;0;0;0;0	40	24	16	91	83	8	52	52	0	47	47	0	28	25	3
chr15	37271001	37272000	1000	*	2.75743e-06	0.00210974	24.1251	Intron (XM_017316623.1/Grhl2, intron 2 of 9)	15	37231798	37233159	1362	2	LOC105245924	XR_875173.1	-37842	XM_017316623.1;XM_017316622.1;XM_017316621.1;XM_006520063.3;XM_006520065.3;NM_026496.4	Grhl2;Grhl2;Grhl2;Grhl2;Grhl2;Grhl2	0;0;0;0;0;0	25	13	12	81	43	38	24	4	20	59	9	50	15	8	7
chr15	38487001	38488000	1000	*	3.21341e-05	0.0124901	-29.4605	Promoter (2-3kb)	15	38490473	38490493	21	2	Mir6951	NA	2493	NM_001102458.1;NM_001301688.1;NM_018745.5;NR_125913.1;XM_006520117.1;XM_006520114.3;NA;NR_105916.1;NA	Azin1;Azin1;Azin1;Azin1;Azin1;Azin1;Mir6951;Mir6951;Mir6951	0;0;0;0;10757;31285;2493;2547;2542	17	8	9	25	23	2	33	32	1	18	18	0	18	18	0
chr15	40228001	40229000	1000	*	4.58659e-05	0.0159428	-29.7032	Distal Intergenic	15	40162603	40168076	5474	1	Gm33301	XR_875319.1	65398	NA	NA	NA	35	23	12	69	44	25	16	16	0	14	14	0	54	45	9
chr15	40400001	40401000	1000	*	1.11723e-05	0.00588017	-40.2718	Distal Intergenic	15	40343266	40350865	7600	1	Gm41311	XR_875320.2	56735	NA	NA	NA	43	7	36	58	18	40	8	7	1	28	10	18	35	24	11
chr15	43387001	43388000	1000	*	1.78856e-13	1.62596e-09	-30.9528	Distal Intergenic	15	43364405	43377497	13093	1	Gm33743	XR_384071.2	22596	NA	NA	NA	145	49	96	79	65	14	63	57	6	23	21	2	27	23	4
chr15	43962001	43963000	1000	*	7.33096e-06	0.00429968	-22.0826	Distal Intergenic	15	43868055	43870614	2560	2	Tmem74	XM_006520908.3	-91387	NA	NA	NA	6	3	3	86	36	50	25	15	10	16	10	6	65	53	12
chr15	44546001	44547000	1000	*	2.49613e-05	0.0104356	22.179	Exon (XM_011245522.2/Pkhd1l1, exon 49 of 62)	15	44619169	44641538	22370	1	Ebag9	XM_006521194.3	-72169	XM_011245522.2;XR_383993.3;XR_875261.2;XR_875262.2;XR_875263.2;XR_875264.2;NM_138674.2;XR_875266.2	Pkhd1l1;Pkhd1l1;Pkhd1l1;Pkhd1l1;Pkhd1l1;Pkhd1l1;Pkhd1l1;Pkhd1l1	0;0;0;0;0;0;0;0	19	18	1	28	27	1	49	28	21	16	13	3	11	9	2
chr15	46520001	46521000	1000	*	4.47031e-05	0.015637	-21.6186	Distal Intergenic	15	46435866	46496179	60314	2	4930523O13Rik	NR_040451.1	-23822	NA	NA	NA	22	10	12	118	75	43	27	19	8	98	87	11	26	18	8
chr15	46567001	46568000	1000	*	9.39474e-05	0.0256968	25.887	Distal Intergenic	15	46623305	46639858	16554	1	4930548G14Rik	NR_045811.1	-55305	NA	NA	NA	62	50	12	61	50	11	68	36	32	42	16	26	113	85	28
chr15	47223001	47224000	1000	*	1.23002e-06	0.00113785	-28.5401	Distal Intergenic	15	46938934	46939822	889	1	Gm38541	Gm38541	284067	NA	NA	NA	31	23	8	23	15	8	19	18	1	20	20	0	33	33	0
chr15	49302001	49303000	1000	*	0.000119731	0.0298134	21.0563	Distal Intergenic	15	49194642	49203161	8520	1	Gm41318	XR_875332.1	107359	NA	NA	NA	50	47	3	56	46	10	33	18	15	25	21	4	40	25	15
chr15	50137001	50138000	1000	*	4.58626e-05	0.0159428	-21.345	Distal Intergenic	15	50654757	50886149	231393	2	Trps1	XM_011245777.1	748149	NA	NA	NA	18	16	2	19	13	6	20	20	0	15	15	0	25	25	0
chr15	50247001	50248000	1000	*	1.99842e-05	0.00891356	-29.237	Distal Intergenic	15	50654757	50886149	231393	2	Trps1	XM_011245777.1	638149	NA	NA	NA	37	16	21	15	13	2	11	10	1	12	11	1	13	13	0
chr15	51990001	51991000	1000	*	0.000168393	0.0371646	-21.7121	Promoter (<=1kb)	15	51962604	51991264	28661	2	Rad21	XM_006520645.1	264	XM_006520645.1;NM_009009.4;XM_006520644.1	Rad21;Rad21;Rad21	0;0;0	48	17	31	106	13	93	20	8	12	31	21	10	83	24	59
chr15	52090001	52091000	1000	*	0.00011992	0.0298531	41.035	Promoter (<=1kb)	15	52089267	52090025	759	1	Gm2387	Gm2387	734	Gm2387	Gm2387	0	11	11	0	15	13	2	25	13	12	13	3	10	11	9	2
chr15	52149001	52150000	1000	*	3.07387e-05	0.0121175	-20.8649	Distal Intergenic	15	52089267	52090025	759	1	Gm2387	Gm2387	59734	NA	NA	NA	74	52	22	75	66	9	21	21	0	5	5	0	17	17	0
chr15	53027001	53028000	1000	*	5.51696e-05	0.0180228	35.8586	Distal Intergenic	15	52727707	52933559	205853	2	Gm41323	XR_875338.2	-93442	NA	NA	NA	6	6	0	26	26	0	6	5	1	11	1	10	18	18	0
chr15	55265001	55266000	1000	*	7.51238e-07	0.000780102	-33.4111	Distal Intergenic	15	55278095	55280791	2697	2	Gm35312	XR_001781718.1	14791	NA	NA	NA	62	30	32	5	3	2	35	31	4	11	10	1	30	25	5
chr15	57600001	57601000	1000	*	2.99751e-05	0.0118996	20.3283	Exon (XR_384108.1/Gm35682, exon 3 of 4)	15	57578930	57592827	13898	1	Gm35771	XR_384110.3	21071	XR_384108.1	Gm35682	0	18	17	1	36	29	7	33	17	16	6	6	0	70	35	35
chr15	59755001	59756000	1000	*	0.000145882	0.0339584	-20.2793	Distal Intergenic	15	59788417	59794959	6543	2	Gm19510	NR_045076.1	38959	NA	NA	NA	12	3	9	66	15	51	90	42	48	34	11	23	88	47	41
chr15	59866001	59867000	1000	*	0.000163788	0.0364969	-20.7634	Distal Intergenic	15	59823417	59831605	8189	1	Gm36819	XR_384128.2	42584	NA	NA	NA	37	28	9	28	21	7	64	62	2	5	5	0	35	32	3
chr15	59972001	59973000	1000	*	2.03129e-05	0.00903597	-34.6032	Distal Intergenic	15	59994065	59994910	846	2	Gm7713	Gm7713	21910	NA	NA	NA	6	3	3	40	12	28	7	6	1	6	4	2	56	40	16
chr15	61689001	61690000	1000	*	0.0001181	0.029593	-26.0201	Distal Intergenic	15	61699284	61774451	75168	2	D030024E09Rik	NR_040350.1	84451	NA	NA	NA	14	13	1	35	12	23	23	20	3	11	9	2	7	7	0
chr15	61691001	61692000	1000	*	9.55452e-06	0.00525551	44.0476	Distal Intergenic	15	61699284	61774451	75168	2	D030024E09Rik	NR_040350.1	82451	NA	NA	NA	12	12	0	7	7	0	12	3	9	5	5	0	7	3	4
chr15	62017001	62018000	1000	*	9.63938e-09	2.46531e-05	-36.5495	Distal Intergenic	15	62037986	62250976	212991	1	Pvt1	NR_003368.2	-19986	NA	NA	NA	32	18	14	22	15	7	27	26	1	31	31	0	11	11	0
chr15	62180001	62181000	1000	*	1.35235e-06	0.00121807	-29.8065	Intron (NR_003368.2/Pvt1, intron 5 of 8)	15	62217541	62219451	1911	2	H2afy3	NR_003523.1	38451	NR_003368.2;NR_132747.1;NR_132746.1	Pvt1;Pvt1;Pvt1	0;0;0	32	21	11	21	15	6	28	28	0	15	15	0	20	19	1
chr15	67800001	67801000	1000	*	5.1172e-05	0.0170972	27.7485	Distal Intergenic	15	68083714	68240526	156813	2	Zfat	XM_011245683.2	439526	NA	NA	NA	5	5	0	25	25	0	19	13	6	6	5	1	20	13	7
chr15	68924001	68925000	1000	*	1.05964e-06	0.00101208	21.8539	Distal Intergenic	15	68928406	69101215	172810	1	Khdrbs3	XR_383979.3	-3406	XR_383979.3;NM_010158.2;XM_006520410.3	Khdrbs3;Khdrbs3;Khdrbs3	-3406;-3420;-4358	134	96	38	97	71	26	71	32	39	62	34	28	112	58	54
chr15	71001001	71002000	1000	*	0.000197237	0.040912	22.0513	Distal Intergenic	15	71309734	71311506	1773	1	Gm5217	Gm5217	-307734	NA	NA	NA	23	23	0	14	14	0	10	8	2	8	8	0	13	7	6
chr15	71243001	71244000	1000	*	3.10299e-05	0.0121877	22.4581	Distal Intergenic	15	71309734	71311506	1773	1	Gm5217	Gm5217	-65734	NA	NA	NA	10	10	0	67	64	3	38	32	6	37	26	11	42	30	12
chr15	73442001	73443000	1000	*	1.19545e-21	2.78011e-17	-20.444	Distal Intergenic	15	73428356	73428959	604	2	Gm10362	XR_001781713.1	-13042	NA	NA	NA	379	80	299	386	74	312	339	120	219	384	193	191	435	157	278
chr15	74929001	74930000	1000	*	0.000131083	0.0317079	-25.6151	Promoter (<=1kb)	15	74930240	74935442	5203	1	Gm39556	XR_001781690.1	-240	XR_001781691.1;XR_001781690.1;XR_875421.2;XR_875424.2;XR_001781689.1;XR_875423.2;XR_875425.2;Gm6610	Gm39556;Gm39556;Gm39556;Gm39556;Gm39556;Gm39556;Gm39556;Gm6610	0;-240;-1156;-1156;-1158;-1162;-1164;5363	41	35	6	23	10	13	44	43	1	11	9	2	53	48	5
chr15	74992001	74993000	1000	*	2.05984e-06	0.0016884	-42.7497	Promoter (1-2kb)	15	74991998	74994447	2450	2	Gm41348	XR_875429.2	1447	XR_875428.1;XR_875426.1;XR_001781692.1;XR_875429.2;Gm8000;NM_001271416.1;NM_001271417.1;NM_001271418.1;NM_001271419.1;NM_001271446.1;NM_010738.3	Gm28068;Gm28068;Gm28068;Gm41348;Gm8000;Ly6a;Ly6a;Ly6a;Ly6a;Ly6a;Ly6a	0;0;0;0;-3522;5031;5031;5031;5031;5031;5031	12	1	11	36	7	29	34	17	17	31	21	10	46	24	22
chr15	75550001	75551000	1000	*	8.67933e-05	0.0242846	-25.6767	Distal Intergenic	15	75564745	75566593	1849	2	Ly6h	XM_006520901.2	15593	NA	NA	NA	62	27	35	53	37	16	30	25	5	26	24	2	42	30	12
chr15	76554001	76555000	1000	*	0.000119051	0.0297176	-38.8088	Promoter (2-3kb)	15	76557435	76559860	2426	1	Gm35739	XR_384210.2	-2435	XR_384210.2	Gm35739	-2435	48	13	35	84	46	38	5	5	0	42	24	18	39	32	7
chr15	77955001	77956000	1000	*	7.1056e-11	3.58869e-07	20.0496	Promoter (<=1kb)	15	77940522	77956722	16201	2	Foxred2	NM_001017983.2	722	NM_018749.2;XM_006521192.1;NM_001017983.2;NM_001168260.1;XM_017316602.1;XM_006520943.3;XM_006520944.3;XM_006520945.2	Eif3d;Eif3d;Foxred2;Foxred2;Foxred2;Foxred2;Foxred2;Foxred2	14824;15088;0;0;0;0;0;0	138	96	42	152	85	67	139	86	53	106	37	69	345	108	237
chr15	78180001	78181000	1000	*	9.41518e-05	0.0257386	26.1538	Distal Intergenic	15	78159463	78174108	14646	2	Ift27	NM_025931.2	-5893	NA	NA	NA	23	23	0	26	24	2	15	9	6	6	5	1	27	18	9
chr15	79327001	79328000	1000	*	3.57414e-05	0.0134663	31.56	Promoter (<=1kb)	15	79286228	79328199	41972	2	Pla2g6	XM_006521152.2	199	XM_006521157.3;XM_006521152.2;XR_001781552.1;XM_006521154.1;XM_006521155.2;XM_006521160.2;XM_006521156.3;XM_006521159.3;NM_001199023.1;NM_001199024.1;NM_001199025.1;NM_016915.4;XM_006521153.3;XM_017316698.1	Pla2g6;Pla2g6;Pla2g6;Pla2g6;Pla2g6;Pla2g6;Pla2g6;Pla2g6;Pla2g6;Pla2g6;Pla2g6;Pla2g6;Pla2g6;Pla2g6	-3400;0;0;0;0;0;0;0;0;0;0;0;0;0	79	16	63	34	22	12	58	19	39	22	0	22	72	0	72
chr15	79770001	79771000	1000	*	0.000227446	0.0446055	20.1905	Intron (NM_017470.2/Dnal4, intron 1 of 3)	15	79761453	79774452	13000	2	Dnal4	XM_006521170.2	3452	NM_017470.2;XM_006521170.2;XR_384251.3;XR_875486.2;XR_875488.2	Dnal4;Dnal4;Gm30977;Gm30977;Gm30977	0;0;-3553;-3553;-3553	28	28	0	25	23	2	25	19	6	5	4	1	49	35	14
chr15	79891001	79892000	1000	*	9.2465e-06	0.00513409	61.9949	Promoter (<=1kb)	15	79892058	79909247	17190	1	Apobec3	XM_017316808.1	-58	XM_017316808.1;XM_017316806.1;XR_001781583.1;NM_001160415.1;NM_030255.3;XM_006521551.2;XM_017316807.1;NR_030675.1	Apobec3;Apobec3;Apobec3;Apobec3;Apobec3;Apobec3;Apobec3;D730005E14Rik	-58;-377;-377;-408;-408;-3028;-3165;0	13	13	0	12	11	1	15	5	10	5	0	5	22	15	7
chr15	79940001	79941000	1000	*	5.44111e-09	1.55017e-05	27.643	Intron (XM_006521148.3/Cbx7, intron 1 of 6)	15	79915804	79932806	17003	2	Cbx7	XR_384025.3	-7195	XM_006521148.3;XM_011245691.2;XM_011245690.2	Cbx7;Cbx7;Cbx7	0;0;0	35	23	12	102	75	27	147	59	88	80	21	59	89	53	36
chr15	80931001	80932000	1000	*	4.29222e-06	0.00292385	-21.5118	3' UTR	15	80940039	80940120	82	1	Mir5113	NR_039573.1	-8039	NM_144812.2;NM_177124.4	Tnrc6b;Tnrc6b	0;0	22	17	5	50	38	12	31	31	0	18	17	1	31	31	0
chr15	81240001	81241000	1000	*	1.92015e-05	0.0086932	23.6336	Downstream (1-2kb)	15	81235499	81238964	3466	1	Mchr1	NM_145132.2	4502	NR_077229.1;NR_077231.1;NR_077230.1;NM_145132.2	8430426J06Rik;8430426J06Rik;8430426J06Rik;Mchr1	6971;6971;10862;4502	51	21	30	70	21	49	85	11	74	31	1	30	66	13	53
chr15	83171001	83172000	1000	*	1.0036e-06	0.000968722	-42.5401	Promoter (<=1kb)	15	83153501	83172208	18708	2	Cyb5r3	NM_029787.2	208	XM_006520282.2;NM_029787.2;XM_006520283.3	Cyb5r3;Cyb5r3;Cyb5r3	-477;0;-793	31	9	22	25	0	25	20	13	7	28	17	11	11	5	6
chr15	83405001	83406000	1000	*	1.73963e-07	0.000241616	-32.3521	Intron (NM_001159510.1/Pacsin2, intron 1 of 10)	15	83376122	83423785	47664	2	Pacsin2	XM_006520982.1	17785	NM_001159510.1;NM_011862.3;NM_001159509.1;XM_006520982.1;XM_006520983.3;XM_006520980.3;XM_006520981.3;XM_017316605.1;XM_011245633.2;XM_006520979.1;XM_006520984.1;XM_006520985.2	Pacsin2;Pacsin2;Pacsin2;Pacsin2;Pacsin2;Pacsin2;Pacsin2;Pacsin2;Pacsin2;Pacsin2;Pacsin2;Pacsin2	0;0;0;0;0;0;0;0;0;0;0;0	52	28	24	97	33	64	31	16	15	16	14	2	39	35	4
chr15	84567001	84568000	1000	*	4.74222e-07	0.000534033	-56.1202	Exon (XR_875522.1/Gm34095, exon 2 of 7)	15	84553398	84557823	4426	2	Ldoc1l	NM_177630.3	-9178	XR_384296.2;XR_875522.1;XR_875523.1;XR_875524.1	Gm34095;Gm34095;Gm34095;Gm34095	0;0;0;0	30	16	14	61	21	40	6	6	0	5	5	0	5	5	0
chr15	84631001	84632000	1000	*	2.79437e-10	1.18405e-06	-28.9698	Distal Intergenic	15	84623113	84627439	4327	2	Gm34201	XR_384299.1	-3562	XR_384298.2;XR_384299.1	Gm34201;Gm34201	-3562;-3562	58	30	28	33	27	6	59	56	3	21	21	0	78	72	6
chr15	85523001	85524000	1000	*	3.6341e-07	0.000434702	27.7748	Distal Intergenic	15	85492736	85503227	10492	2	7530416G11Rik	NM_001256072.1	-19774	NA	NA	NA	23	15	8	67	39	28	49	13	36	15	8	7	82	18	64
chr15	85675001	85676000	1000	*	5.74516e-05	0.0184376	42.0711	Distal Intergenic	15	85703773	85707524	3752	1	Lncppara	NR_110483.1	-27773	NA	NA	NA	10	6	4	17	8	9	15	0	15	32	7	25	56	7	49
chr15	86408001	86409000	1000	*	0.000151565	0.0347625	-24.2857	Intron (XM_006520833.2/Tbc1d22a, intron 11 of 11)	15	86277675	86498503	220829	1	Tbc1d22a	XM_017316576.1	130326	XM_006520833.2;NM_145476.2;XM_017316576.1	Tbc1d22a;Tbc1d22a;Tbc1d22a	0;0;0	5	4	1	21	15	6	16	16	0	18	18	0	6	6	0
chr15	88267001	88268000	1000	*	0.000117156	0.0294402	-37.0291	Intron (XR_875552.1/LOC105246011, intron 4 of 6)	15	88314874	88372651	57778	1	B230214G05Rik	NR_045281.1	-46874	XR_875552.1;XR_875555.1;XR_875556.1;XR_875554.1;XR_875553.1	LOC105246011;LOC105246011;LOC105246011;LOC105246011;LOC105246011	0;0;0;0;0	15	2	13	57	17	40	6	3	3	13	8	5	28	18	10
chr15	88658001	88659000	1000	*	1.29116e-05	0.00650133	-20.0151	Intron (XR_384331.2/Gm35997, intron 2 of 2)	15	88656461	88662615	6155	2	Gm35997	XR_384331.2	3615	XR_384331.2;XR_384332.2	Gm35997;Gm35997	0;0	21	3	18	69	9	60	70	30	40	11	2	9	45	18	27
chr15	88791001	88792000	1000	*	2.10734e-05	0.00928343	32.906	Distal Intergenic	15	88805245	88819248	14004	2	Alg12	XM_006520842.2	27248	NA	NA	NA	65	44	21	44	37	7	29	11	18	27	9	18	52	30	22
chr15	90934001	90935000	1000	*	1.42712e-07	0.000206828	-21.5713	3' UTR	15	90916161	90919638	3478	1	Gm36618	XR_384342.3	17840	XM_017316441.1;XM_017316442.1;XM_017316444.1;XM_017316446.1;XM_017316447.1;XM_017316448.1;XM_017316449.1;XM_017316450.1;XM_017316451.1;XM_017316452.1;XM_017316453.1;XM_017316454.1;XM_017316455.1;XM_017316456.1;XM_017316457.1;XM_017316458.1;XM_017316459.1;XM_017316460.1;XM_017316461.1;XM_017316462.1;XM_017316463.1;XM_017316464.1;XM_017316465.1;XM_017316466.1;XM_017316468.1;XM_017316470.1;XM_017316…	Kif21a;Kif21a;Kif21a;Kif21a;Kif21a;Kif21a;Kif21a;Kif21a;Kif21a;Kif21a;Kif21a;Kif21a;Kif21a;Kif21a;Kif21a;Kif21a;Kif21a;Kif21a;Kif21a;Kif21a;Kif21a;Kif21a;Kif21a;Kif21a;Kif21a;Kif21a;Kif21a;Kif21a;Kif21a;Kif21a;Kif21a;Kif21a;Kif21a;Kif21a;Kif21a;Kif21a;Kif21a;Kif21a;Kif21a;Kif21a;Kif21a;Kif21a;Kif21a;Kif21a	0;0;0;0;0;0;0;0;0;0;0;0;0;0;0;0;0;0;0;0;0;0;0;0;0;0;0;0;0;0;0;0;0;0;0;0;0;0;0;0;0;0;0;0	89	28	61	91	13	78	18	6	12	15	5	10	60	40	20
chr15	91073001	91074000	1000	*	8.2819e-05	0.0235415	-40.0225	Distal Intergenic	15	91050723	91051053	331	2	Gm36710	XR_384343.1	-21948	NA	NA	NA	26	12	14	19	6	13	6	4	2	5	4	1	20	18	2
chr15	91107001	91108000	1000	*	0.000132612	0.0318491	37.8714	Distal Intergenic	15	91128725	91129923	1199	2	Gm7167	XR_002061.4	21923	NA	NA	NA	38	36	2	37	31	6	6	1	5	5	5	0	8	3	5
chr15	91399001	91400000	1000	*	0.000235401	0.0455233	-22.4599	Intron (NM_001033633.3/Slc2a13, intron 4 of 9)	15	91267691	91573261	305571	2	Slc2a13	NM_001033633.3	173261	NM_001033633.3	Slc2a13	0	11	8	3	17	14	3	20	20	0	12	12	0	20	20	0
chr15	91874001	91875000	1000	*	4.16958e-05	0.0149555	22.7652	Exon (NM_207243.2/Muc19, exon 6 of 44)	15	91838328	91861435	23108	1	Smgc	NM_198927.3	35673	NM_207243.2	Muc19	0	32	30	2	25	22	3	66	54	12	68	31	37	13	10	3
chr15	92289001	92290000	1000	*	1.43491e-07	0.000207058	-31.3025	3' UTR	15	92343775	92366929	23155	1	Gm26760	XR_875579.1	-53775	NM_001159648.1;XM_006520383.3;XM_017316422.1;NM_007727.2;XM_017316423.1;NM_001159647.1	Cntn1;Cntn1;Cntn1;Cntn1;Cntn1;Cntn1	0;0;0;0;0;0	65	46	19	82	42	40	34	31	3	17	17	0	28	24	4
chr15	92826001	92827000	1000	*	8.02948e-05	0.0230798	26.9618	Distal Intergenic	15	93001490	93073371	71882	1	Gm30085	XR_875582.2	-174490	NA	NA	NA	10	10	0	25	23	2	5	5	0	11	7	4	23	10	13
chr15	92936001	92937000	1000	*	5.38743e-07	0.000592026	-33.4229	Distal Intergenic	15	93001490	93073371	71882	1	Gm30085	XR_875582.2	-64490	NA	NA	NA	68	31	37	82	48	34	22	18	4	23	21	2	30	25	5
chr15	93223001	93224000	1000	*	0.000195025	0.0406614	36.7836	Distal Intergenic	15	93165229	93204866	39638	2	Gm38535	XR_875583.2	-18135	NA	NA	NA	6	6	0	22	20	2	16	9	7	44	24	20	23	15	8
chr15	93236001	93237000	1000	*	8.16404e-05	0.0233325	-35.7273	Downstream (2-3kb)	15	93165229	93204866	39638	2	Gm38535	XR_875583.2	-31135	XM_006520847.1;XM_006520848.1;XM_006520849.1;NM_001033275.4	Gxylt1;Gxylt1;Gxylt1;Gxylt1	38336;38336;38336;38084	29	4	25	28	8	20	26	11	15	20	12	8	19	13	6
chr15	93634001	93635000	1000	*	3.66179e-05	0.0136736	21.7036	Distal Intergenic	15	93614264	93622641	8378	1	Gm41385	XR_001781747.1	19737	XR_001781751.1;XR_001781750.1	Gm41385;Gm41385	22289;22289	31	30	1	14	14	0	45	26	19	20	19	1	22	17	5
chr15	93799001	93800000	1000	*	0.000108757	0.028139	30.5556	Distal Intergenic	15	93732690	93741854	9165	1	Gm30339	XR_875592.1	66311	NA	NA	NA	17	17	0	22	22	0	12	9	3	6	6	0	6	2	4
chr15	96197001	96198000	1000	*	8.52608e-08	0.000139315	-23.2431	Promoter (<=1kb)	15	96190474	96197974	7501	2	2610037D02Rik	NR_040423.1	0	NR_040423.1;XM_011245785.2;NR_028311.1	2610037D02Rik;Gm38469;Gm4371	0;0;0	159	95	64	140	102	38	37	33	4	27	26	1	184	153	31
chr15	96236001	96237000	1000	*	1.43834e-11	8.94195e-08	-20.7998	Intron (XM_011245785.2/Gm38469, intron 1 of 2)	15	96231870	96254684	22815	2	4833422M21Rik	NR_130160.1	17684	NR_130160.1;XM_011245785.2	4833422M21Rik;Gm38469	0;0	6	1	5	137	24	113	91	29	62	49	8	41	197	129	68
chr15	96767001	96768000	1000	*	0.000155437	0.0353037	-23.3333	Distal Intergenic	15	96818707	96831170	12464	1	Gm32564	XR_384400.2	-50707	NA	NA	NA	15	8	7	10	10	0	11	11	0	11	11	0	16	16	0
chr15	96794001	96795000	1000	*	1.95243e-05	0.0087742	-25.1515	Distal Intergenic	15	96818707	96831170	12464	1	Gm32564	XR_384400.2	-23707	NA	NA	NA	33	23	10	25	20	5	20	20	0	17	17	0	5	5	0
chr15	97855001	97856000	1000	*	9.6959e-05	0.0261646	32.2222	3' UTR	15	97847467	97872854	25388	1	Gm33690	XR_384427.3	7534	XR_384427.3;NM_009504.4	Gm33690;Vdr	0;0	5	5	0	29	29	0	6	2	4	5	5	0	10	7	3
chr15	97965001	97966000	1000	*	5.22323e-08	9.58065e-05	29.9204	Promoter (<=1kb)	15	97964229	97970286	6058	1	Tmem106c	NM_201359.2	772	XM_006521120.3;XM_006521119.1;XM_006521117.1;XM_006521121.3;XM_017316672.1;NM_001252153.1;NM_201359.2	Tmem106c;Tmem106c;Tmem106c;Tmem106c;Tmem106c;Tmem106c;Tmem106c	0;0;0;0;0;0;0	5	3	2	98	72	26	49	14	35	19	5	14	18	10	8
chr15	99583001	99584000	1000	*	1.97945e-06	0.00164543	-63.9394	Exon (NM_009699.3/Aqp2, exon 3 of 4)	15	99579056	99584545	5490	1	Aqp2	NM_009699.3	3945	NM_009699.3;XR_384446.2;XR_875660.1	Aqp2;Gm34765;Gm34765	0;0;0	15	2	13	5	1	4	10	6	4	5	5	0	22	18	4
chr15	99663001	99664000	1000	*	3.50978e-08	7.03363e-05	23.2611	Downstream (<1kb)	15	99664364	99669558	5195	2	Gm34880	XR_384449.3	5558	XR_384449.3;XR_875662.2	Gm34880;Gm34880	5558;5558	25	24	1	43	41	2	22	18	4	5	4	1	83	46	37
chr15	99802001	99803000	1000	*	0.000116553	0.0293585	22.8883	5' UTR	15	99778470	99806486	28017	2	Lima1	XM_006521245.1	3486	NM_023063.4;NM_001113545.1;XM_006521245.1;XR_001781560.1	Lima1;Lima1;Lima1;Lima1	0;0;0;0	18	18	0	21	21	0	43	38	5	10	8	2	27	17	10
chr15	99855001	99856000	1000	*	0.000274084	0.0498347	-43.0392	Intron (NM_001113545.1/Lima1, intron 1 of 10)	15	99778470	99875451	96982	2	Lima1	XR_001781560.1	19451	NM_001113545.1;XR_001781560.1	Lima1;Lima1	0;0	26	13	13	15	5	10	17	16	1	5	5	0	10	6	4
chr15	99971001	99972000	1000	*	7.19486e-06	0.00424225	-33.9393	Promoter (<=1kb)	15	99972780	100016358	43579	1	Larp4	NM_001024526.2	-780	NR_028124.1;NM_001080948.2;NM_001284522.1;NM_001024526.2;NM_001284521.1;NM_001284523.1;XM_006520675.1;XM_017316524.1	2310068J16Rik;Larp4;Larp4;Larp4;Larp4;Larp4;Larp4;Larp4	1287;0;0;-780;-780;-780;-1361;-1361	20	5	15	37	9	28	38	30	8	21	9	12	50	27	23
chr15	100305001	100306000	1000	*	0.000273084	0.049733	-33.1446	Promoter (<=1kb)	15	100304817	100314348	9532	1	Mettl7a1	NM_027334.3	184	XM_006521389.1;XM_006521390.3;XM_011245728.1;NM_027334.3	Mettl7a1;Mettl7a1;Mettl7a1;Mettl7a1	0;0;0;0	12	4	8	17	0	17	10	3	7	37	16	21	21	16	5
chr15	101499001	101500000	1000	*	7.7903e-07	0.000801471	65.5914	Distal Intergenic	15	101503816	101506313	2498	1	Gm6042	NR_002872.1	-3816	NR_002872.1	Gm6042	-3816	16	15	1	23	20	3	5	3	2	5	0	5	7	1	6
chr15	101744001	101745000	1000	*	2.33844e-05	0.00994889	69.3122	Promoter (<=1kb)	15	101733949	101743097	9149	2	Krt71	NM_019956.1	-904	NM_019956.1	Krt71	-904	6	6	0	5	5	0	18	5	13	6	0	6	14	9	5
chr15	101817001	101818000	1000	*	9.46148e-09	2.42602e-05	-21.0726	Promoter (<=1kb)	15	101810689	101818101	7413	2	Krt2	XM_011245476.1	101	XM_011245476.1;NM_010668.2	Krt2;Krt2	0;0	13	11	2	69	24	45	55	48	7	17	13	4	28	22	6
chr15	103011001	103012000	1000	*	3.98223e-07	0.000465214	-23.0094	Promoter (1-2kb)	15	103009562	103011881	2320	1	Hoxc6	NM_010465.2	1439	NM_175730.5;XM_006520469.2;XM_017316437.1;XM_006520468.3;NM_010465.2;NR_030526.1;NA;NA	Hoxc5;Hoxc6;Hoxc6;Hoxc6;Hoxc6;Mir615;Mir615;Mir615	-2008;0;0;0;0;-2910;-2926;-2969	73	4	69	99	24	75	39	23	16	28	4	24	114	46	68
chr16	4418001	4419000	1000	*	8.51721e-05	0.0239611	32.2116	Promoter (1-2kb)	16	4284886	4420498	135613	2	Adcy9	NM_001291910.1	1498	NM_001291910.1;NM_009624.3;XM_011245805.1;XM_011245806.1	Adcy9;Adcy9;Adcy9;Adcy9	0;0;0;0	15	14	1	32	28	4	47	19	28	23	11	12	44	38	6
chr16	4683001	4684000	1000	*	0.000172888	0.0377567	34.3112	Promoter (<=1kb)	16	4684070	4707695	23626	1	Dnaja3	NM_001135112.1	-70	NM_030205.4;NM_001135112.1;NM_023646.4	Coro7;Dnaja3;Dnaja3	-3281;-70;-70	49	3	46	16	10	6	5	0	5	21	0	21	16	0	16
chr16	4743001	4744000	1000	*	4.87494e-07	0.000544686	-31.4286	Promoter (1-2kb)	16	4741613	4766249	24637	1	Hmox2	NM_010443.2	1388	NM_001136066.2;NM_010443.2	Hmox2;Hmox2	0;0	28	23	5	40	22	18	29	29	0	5	5	0	7	7	0
chr16	4983001	4984000	1000	*	1.43772e-07	0.000207164	31.9501	Downstream (2-3kb)	16	4987315	4997846	10532	2	Sept12	XM_006522579.3	13846	NR_073370.1;NM_027669.3;XM_006522579.3;XM_006522577.2;XM_006522578.2;XM_006522580.1;NM_029374.1	4930451G09Rik;Sept12;Sept12;Sept12;Sept12;Sept12;Sept12	18712;13852;13846;13847;13847;13847;13852	44	43	1	27	25	2	27	26	1	30	10	20	20	12	8
chr16	5524001	5525000	1000	*	1.47552e-05	0.00718364	54.8387	Distal Intergenic	16	5483865	5484954	1090	1	Gm41416	XR_875873.1	40136	NA	NA	NA	15	14	1	5	4	1	31	11	20	5	0	5	5	3	2
chr16	8487001	8488000	1000	*	1.47902e-05	0.00719718	-23.1183	Exon (XM_006522107.3/Mettl22, exon 9 of 11)	16	8459072	8473692	14621	2	Gm30012	XR_875879.2	-13309	XM_006522107.3;NM_146247.1	Mettl22;Mettl22	0;0	15	10	5	31	27	4	46	46	0	10	10	0	20	20	0
chr16	9017001	9018000	1000	*	1.21854e-07	0.000182689	-36.4628	Distal Intergenic	16	9005360	9007239	1880	1	Gm30444	XR_875894.1	11641	NA	NA	NA	15	7	8	46	31	15	69	62	7	31	30	1	65	61	4
chr16	13731001	13732000	1000	*	2.04555e-06	0.0016822	-28.5208	Promoter (<=1kb)	16	13715057	13731018	15962	2	Pla2g10	XM_017316987.1	0	NM_001291009.2;NM_011987.4;NR_110990.2;XM_017316987.1;NR_040574.1	Pla2g10;Pla2g10;Pla2g10;Pla2g10;Pla2g10os	-517;-517;-517;0;0	6	6	0	47	9	38	7	7	0	14	9	5	7	7	0
chr16	14068001	14069000	1000	*	1.71505e-05	0.0080281	-24.3089	Intron (NM_144518.3/2900011O08Rik, intron 2 of 5)	16	14037902	14039009	1108	2	Gm15807	Gm15807	-28992	NM_144518.3;XM_006522482.3	2900011O08Rik;2900011O08Rik	0;0	19	13	6	65	34	31	31	27	4	13	10	3	30	27	3
chr16	15609001	15610000	1000	*	3.8193e-16	5.23191e-12	-21.3645	Promoter (<=1kb)	16	15609020	15609623	604	1	Gm7748	Gm7748	0	Gm7748	Gm7748	0	317	140	177	129	92	37	129	88	41	98	89	9	198	155	43
chr16	15772001	15773000	1000	*	5.88844e-05	0.0187257	-30.1926	Exon (XM_017316892.1/Prkdc, exon 58 of 71)	16	15724794	15842252	117459	1	Prkdc	XM_011245841.2	47207	XM_017316892.1;XM_006521861.3;NM_011159.2;XM_011245841.2	Prkdc;Prkdc;Prkdc;Prkdc	0;0;0;0	28	13	15	16	6	10	17	13	4	14	6	8	35	34	1
chr16	16829001	16830000	1000	*	3.5492e-06	0.00256445	-24.8161	Promoter (<=1kb)	16	16753016	16829363	76348	2	Spag6l	NM_015773.2	0	NM_015773.2;XM_017317063.1	Spag6l;Spag6l	0;0	5	0	5	98	0	98	62	7	55	6	3	3	38	5	33
chr16	17222001	17223000	1000	*	5.07555e-07	0.000564694	20.7043	Distal Intergenic	16	17233587	17263430	29844	1	Hic2	NM_178922.3	-10587	NA	NA	NA	131	63	68	102	38	64	107	40	67	186	43	143	74	4	70
chr16	17406001	17407000	1000	*	1.01897e-05	0.00549905	-27.5397	Promoter (<=1kb)	16	17280351	17406314	125964	2	Pi4ka	NM_001001983.2	0	NM_001001983.2;XM_006522034.1;XM_006522036.3;NM_023348.4	Pi4ka;Pi4ka;Pi4ka;Snap29	0;-113;-113;0	87	0	87	25	0	25	36	3	33	5	3	2	21	3	18
chr16	21450001	21451000	1000	*	3.40339e-06	0.00248061	-28.871	Intron (NM_001285893.1/Vps8, intron 7 of 46)	16	21423257	21644676	221420	1	Vps8	XM_006521954.2	26744	NM_001285893.1;NM_001285894.1;XM_006521953.2;XM_006521956.2;XM_006521955.3;XM_006521954.2	Vps8;Vps8;Vps8;Vps8;Vps8;Vps8	0;0;0;0;0;0	5	3	2	62	51	11	30	30	0	11	11	0	37	37	0
chr16	22429001	22430000	1000	*	0.000162754	0.0363757	36.7117	Intron (NM_023794.2/Etv5, intron 5 of 12)	16	22381546	22438714	57169	2	Etv5	XM_006521657.3	8714	NM_023794.2;XM_006521657.3	Etv5;Etv5	0;0	12	9	3	16	12	4	37	13	24	10	5	5	37	11	26
chr16	22432001	22433000	1000	*	0.000169126	0.0372115	-38.8846	Intron (NM_023794.2/Etv5, intron 5 of 12)	16	22381546	22438714	57169	2	Etv5	XM_006521657.3	5714	NM_023794.2;XM_006521657.3	Etv5;Etv5	0;0	76	39	37	32	16	16	10	10	0	12	12	0	51	35	16
chr16	23967001	23968000	1000	*	0.000112355	0.0287647	21.3852	Intron (NM_009744.3/Bcl6, intron 9 of 9)	16	23965171	23981815	16645	2	Bcl6	XM_017316855.1	13815	NM_009744.3;XM_017316855.1	Bcl6;Bcl6	0;0	38	34	4	80	69	11	24	17	7	38	21	17	15	11	4
chr16	24806001	24807000	1000	*	5.77006e-06	0.00362669	-45.4321	Intron (NM_178665.5/Lpp, intron 8 of 12)	16	24827855	24827940	86	1	Mir28a	NR_029788.1	-20855	NM_178665.5;XM_017316922.1;XM_006521957.3;NM_001145952.1;NM_001145954.1	Lpp;Lpp;Lpp;Lpp;Lpp	0;0;0;0;0	16	10	6	8	3	5	54	52	2	5	5	0	30	27	3
chr16	26990001	26991000	1000	*	7.54512e-06	0.00439693	24.5769	Promoter (<=1kb)	16	26957235	26991652	34418	2	Gmnc	NM_001013761.2	652	NM_001013761.2;NM_001285918.1;XM_006522113.2	Gmnc;Gmnc;Gmnc	0;0;0	55	48	7	50	39	11	41	26	15	27	15	12	96	53	43
chr16	28596001	28597000	1000	*	5.11075e-09	1.46022e-05	24.457	Promoter (2-3kb)	16	28599940	28599961	22	2	Mir690	NA	2961	NM_010199.4;NR_030463.1;NA	Fgf12;Mir690;Mir690	0;3043;2961	32	32	0	68	67	1	65	50	15	40	27	13	5	4	1
chr16	29657001	29658000	1000	*	5.85825e-09	1.65021e-05	-30.8462	Intron (XM_006522656.3/Opa1, intron 30 of 30)	16	29579334	29654602	75269	1	Opa1	NM_133752.3	77667	XM_006522654.3;XM_006522655.2;XM_006522656.3;XM_006522657.2;NM_001199177.1;NM_133752.3	Opa1;Opa1;Opa1;Opa1;Opa1;Opa1	77692;77692;0;77691;77667;77667	16	10	6	106	62	44	31	29	2	21	19	2	60	54	6
chr16	30387001	30388000	1000	*	4.95063e-09	1.41852e-05	31.6469	Promoter (<=1kb)	16	30312423	30388530	76108	2	Atp13a3	NM_001128094.1	530	NM_001128094.1;NM_001128096.1;XM_011245879.2;XM_017316958.1	Atp13a3;Atp13a3;Atp13a3;Atp13a3	0;0;0;0	36	32	4	38	28	10	37	7	30	45	18	27	10	9	1
chr16	30511001	30512000	1000	*	0.000223214	0.0440698	40.0842	3' UTR	16	30520043	30550568	30526	2	Tmem44	XM_017316961.1	38568	NM_172614.3;XM_006522070.1;XM_006522071.1;XM_006522061.3;XM_006522062.3;XM_006522065.3;XM_006522059.3;XM_006522060.3	Tmem44;Tmem44;Tmem44;Tmem44;Tmem44;Tmem44;Tmem44;Tmem44	0;38570;38572;38828;38829;38830;38833;38833	45	36	9	21	19	2	29	26	3	31	8	23	5	1	4
chr16	32377001	32378000	1000	*	0.000243989	0.0465539	28.4848	Intron (XM_011245880.2/Ubxn7, intron 8 of 8)	16	32400012	32407630	7619	1	Tm4sf19	XM_006522222.2	-22012	XM_011245880.2;XM_006522079.3;NM_177633.4	Ubxn7;Ubxn7;Ubxn7	0;0;0	6	6	0	22	22	0	5	3	2	5	5	0	11	6	5
chr16	33063001	33064000	1000	*	9.81167e-07	0.000954018	-32.3333	Promoter (<=1kb)	16	33062521	33125659	63139	1	Lmln	NM_172823.2	480	XR_384560.3;XR_384561.3;XR_384562.3;XR_384563.3;NM_172823.2;NM_001130485.1;NM_001130484.1;NM_021338.3	Lmln;Lmln;Lmln;Lmln;Lmln;Rpl35a;Rpl35a;Rpl35a	0;0;0;0;0;6548;6519;6487	25	0	25	10	0	10	15	0	15	25	13	12	20	9	11
chr16	33186001	33187000	1000	*	1.47365e-05	0.00717923	26.5695	Promoter (<=1kb)	16	33185071	33243312	58242	1	Osbpl11	NM_176840.3	930	XM_011245797.2;NM_176840.3	Osbpl11;Osbpl11	0;0	20	14	6	5	0	5	33	2	31	5	0	5	26	5	21
chr16	33250001	33251000	1000	*	1.15833e-07	0.000176845	-46.6354	Promoter (<=1kb)	16	33251456	33299562	48107	1	Snx4	NM_080557.2	-456	NM_080557.2	Snx4	-456	31	13	18	6	2	4	33	32	1	35	22	13	57	53	4
chr16	33339001	33340000	1000	*	0.000249364	0.0470498	24.8887	Distal Intergenic	16	33379854	33380736	883	2	1700007L15Rik	NR_045709.1	40736	NA	NA	NA	70	26	44	45	28	17	60	13	47	52	6	46	68	28	40
chr16	33399001	33400000	1000	*	6.44069e-05	0.0199644	23.2944	Promoter (<=1kb)	16	33399312	33498645	99334	1	Zfp148	XM_006522101.3	0	NM_011749.4;XM_006522103.3;XM_006522098.3;XM_006522100.3;XM_011245888.2;XM_017316980.1;XM_006522099.3;XM_006522101.3;XM_006522102.3	Zfp148;Zfp148;Zfp148;Zfp148;Zfp148;Zfp148;Zfp148;Zfp148;Zfp148	0;0;0;0;0;0;0;0;-445	53	37	16	78	63	15	50	29	21	34	19	15	38	16	22
chr16	34464001	34465000	1000	*	9.60333e-05	0.0260253	-45.2529	Intron (XM_011245958.2/Kalrn, intron 1 of 59)	16	33969073	34490742	521670	2	Kalrn	XM_011245958.2	25742	XM_011245958.2;XM_011245959.2;NM_177357.3;XM_006522363.3;XM_011245954.2;XM_006522364.3;XM_006522370.3;XM_006522386.3;XM_011245951.2;XM_011245952.2;XM_011245953.2;XM_011245956.2;XM_011245957.2;XM_011245960.2;XM_011245961.2;XM_017317071.1;XR_001781844.1;XR_001781845.1;XM_011245955.1;XM_011245963.2;XM_011245965.2;XM_011245966.2;XM_011245967.2;XM_017317072.1;XM_017317074.1;XM_017317073.1;XM_006522382…	Kalrn;Kalrn;Kalrn;Kalrn;Kalrn;Kalrn;Kalrn;Kalrn;Kalrn;Kalrn;Kalrn;Kalrn;Kalrn;Kalrn;Kalrn;Kalrn;Kalrn;Kalrn;Kalrn;Kalrn;Kalrn;Kalrn;Kalrn;Kalrn;Kalrn;Kalrn;Kalrn;Kalrn;Kalrn;Kalrn;Kalrn;Kalrn;Kalrn;Kalrn	0;0;0;0;0;0;0;0;0;0;0;0;0;0;0;0;0;0;0;0;0;0;0;0;0;0;0;0;0;0;0;0;0;0	17	3	14	11	6	5	16	12	4	12	10	2	7	6	1
chr16	35745001	35746000	1000	*	0.000217077	0.0432768	-20.8333	Intron (NM_153550.3/Dirc2, intron 2 of 8)	16	35694903	35769356	74454	2	Dirc2	NM_153550.3	23356	NM_153550.3	Dirc2	0	12	11	1	21	14	7	5	5	0	5	5	0	29	29	0
chr16	35940001	35941000	1000	*	2.28191e-05	0.00980216	-22.9574	Promoter (<=1kb)	16	35926515	35939027	12513	2	Dtx3l	NM_001013371.2	-974	NM_001013371.2;NM_030253.3;XM_006522756.3;XM_006522757.3;XM_006522755.2;XM_011246046.2	Dtx3l;Parp9;Parp9;Parp9;Parp9;Parp9	-974;0;0;0;0;-2378	110	39	71	91	34	57	79	54	25	45	29	16	117	53	64
chr16	36782001	36783000	1000	*	4.24923e-08	8.23495e-05	-20.6358	Promoter (1-2kb)	16	36750164	36784962	34799	2	Slc15a2	NM_021301.3	1962	NM_021301.3;XR_384581.3;NM_001145899.1	Slc15a2;Slc15a2;Slc15a2	0;0;0	88	4	84	29	15	14	51	5	46	21	13	8	63	47	16
chr16	36914001	36915000	1000	*	0.000112962	0.0288537	-20.5685	Exon (XM_011245884.2/Golgb1, exon 14 of 17)	16	36880519	36897189	16671	2	4930565N06Rik	NR_040476.1	-16812	XM_011245884.2;XM_006522082.2;XM_011245881.2;XM_017316963.1;XM_017316964.1;XM_017316965.1;XM_017316966.1;XM_006522084.3;XM_006522083.3;NM_030035.1	Golgb1;Golgb1;Golgb1;Golgb1;Golgb1;Golgb1;Golgb1;Golgb1;Golgb1;Golgb1	0;0;0;0;0;0;0;0;0;0	64	58	6	42	26	16	40	37	3	50	49	1	13	13	0
chr16	37915001	37916000	1000	*	2.72727e-06	0.00208986	-22.2122	Promoter (<=1kb)	16	37915998	37997937	81940	1	Gpr156	XM_011245894.2	0	XM_011245894.2;NM_153394.2	Gpr156;Gpr156	0;0	107	31	76	90	33	57	61	32	29	60	32	28	86	51	35
chr16	37938001	37939000	1000	*	6.49365e-05	0.0200793	52.8968	Intron (XM_011245894.2/Gpr156, intron 1 of 9)	16	37916496	38007530	91035	1	Gpr156	NM_153394.2	21505	XM_011245894.2;NM_153394.2	Gpr156;Gpr156	0;0	16	8	8	5	4	1	42	10	32	22	0	22	40	5	35
chr16	38044001	38045000	1000	*	1.57774e-09	5.44047e-06	-30.8468	Intron (NR_040565.1/4930542C21Rik, intron 3 of 3)	16	38017323	38054526	37204	1	4930542C21Rik	NR_040565.1	26678	NR_040565.1;XR_001781893.1;XR_001781895.1;XR_001781896.1;XR_001781894.1;XR_001781897.1	4930542C21Rik;LOC108168284;LOC108168284;LOC108168284;LOC108168284;LOC108168284	0;0;0;0;0;0	5	5	0	31	4	27	31	25	6	10	10	0	32	26	6
chr16	38048001	38049000	1000	*	2.11269e-06	0.00172183	-24.0934	Exon (XR_001781897.1/LOC108168284, exon 4 of 4)	16	38017323	38054526	37204	1	4930542C21Rik	NR_040565.1	30678	NR_040565.1;XR_001781893.1;XR_001781895.1;XR_001781896.1;XR_001781894.1;XR_001781897.1	4930542C21Rik;LOC108168284;LOC108168284;LOC108168284;LOC108168284;LOC108168284	0;0;0;0;0;0	78	26	52	50	20	30	15	11	4	73	59	14	32	9	23
chr16	38321001	38322000	1000	*	0.000106309	0.0277208	29.2949	Exon (NM_001081025.1/Maats1, exon 9 of 17)	16	38297774	38334731	36958	2	Maats1	XM_006522245.3	12731	NM_001081025.1;XM_006522245.3	Maats1;Maats1	0;0	37	37	0	18	18	0	56	49	7	39	33	6	5	2	3
chr16	38790001	38791000	1000	*	4.61637e-08	8.74387e-05	37.4424	Intron (XM_017316943.1/Upk1b, intron 1 of 7)	16	38773182	38797982	24801	2	Upk1b	XM_017316943.1	6982	XM_017316943.1;NM_178924.4	Upk1b;Upk1b	0;0	15	12	3	105	54	51	69	14	55	82	11	71	45	23	22
chr16	41259001	41260000	1000	*	1.52087e-05	0.00733655	-27.7217	Distal Intergenic	16	41532779	42181679	648901	1	Lsamp	XM_006522201.3	-272779	NA	NA	NA	64	32	32	54	28	26	27	23	4	20	15	5	66	50	16
chr16	41778001	41779000	1000	*	8.9839e-06	0.00503582	34.1743	Intron (XM_006522201.3/Lsamp, intron 1 of 8)	16	41832199	41841980	9782	2	LOC108168287	XR_001781926.1	62980	XM_006522201.3;XM_006522202.3;NM_175548.3	Lsamp;Lsamp;Lsamp	0;0;0	5	3	2	56	41	15	27	7	20	15	1	14	17	11	6
chr16	43475001	43476000	1000	*	5.9697e-05	0.0189034	21.2198	Intron (XM_017317093.1/Zbtb20, intron 8 of 12)	16	43503332	43642590	139259	1	Zbtb20	XM_006522409.3	-27332	XM_017317093.1;XM_006522413.3;XM_011245985.2;XM_017317089.1;XM_017317090.1;XM_017317095.1;XM_017317104.1;XM_011245978.2;XM_011245981.2;XM_011245982.2;XM_011245983.2;XM_011245989.2;XM_011245990.2;XM_017317099.1;XM_017317100.1;XM_017317101.1;XM_017317103.1;XM_017317092.1;XM_017317094.1;XM_017317096.1;XM_006522403.3;XM_011245980.2;XM_011245984.2;XM_011245986.2;XM_011245987.2;XM_017317105.1;NM_001285…	Zbtb20;Zbtb20;Zbtb20;Zbtb20;Zbtb20;Zbtb20;Zbtb20;Zbtb20;Zbtb20;Zbtb20;Zbtb20;Zbtb20;Zbtb20;Zbtb20;Zbtb20;Zbtb20;Zbtb20;Zbtb20;Zbtb20;Zbtb20;Zbtb20;Zbtb20;Zbtb20;Zbtb20;Zbtb20;Zbtb20;Zbtb20;Zbtb20;Zbtb20;Zbtb20;Zbtb20;Zbtb20;Zbtb20;Zbtb20;Zbtb20;Zbtb20;Zbtb20;Zbtb20;Zbtb20;Zbtb20;Zbtb20;Zbtb20	0;0;0;0;0;0;0;0;0;0;0;0;0;0;0;0;0;0;0;0;0;0;0;0;0;0;0;0;0;0;0;0;0;0;0;0;0;0;0;0;0;0	34	31	3	38	33	5	19	9	10	5	5	0	25	14	11
chr16	44063001	44064000	1000	*	0.0001629	0.036386	27.5852	Promoter (<=1kb)	16	43980350	44063464	83115	2	Gramd1c	XM_006521894.2	0	XM_006521895.3;XM_006521894.2;XM_011245853.2	Gramd1c;Gramd1c;Gramd1c	-1280;0;0	30	23	7	20	18	2	23	15	8	20	15	5	37	10	27
chr16	44404001	44405000	1000	*	5.98132e-08	0.000105864	-26.4362	Promoter (1-2kb)	16	44406839	44482694	75856	1	Cfap44	XM_006521963.2	-1839	XR_001781809.1;XM_006521968.2;XR_875764.1;XR_875763.1;XR_875765.1;XM_011245864.2;NM_001033247.1;XM_006521963.2;XM_006521964.2	Cfap44;Cfap44;Cfap44;Cfap44;Cfap44;Cfap44;Cfap44;Cfap44;Cfap44	0;0;0;0;0;0;0;-1839;-1839	47	18	29	55	1	54	37	21	16	52	12	40	114	68	46
chr16	44579001	44580000	1000	*	2.07932e-08	4.71502e-05	35.3194	Distal Intergenic	16	44485045	44558870	73826	2	Boc	NM_172506.2	-20131	NA	NA	NA	41	35	6	44	37	7	28	5	23	23	19	4	67	32	35
chr16	44778001	44779000	1000	*	3.54286e-07	0.000426337	-21.8673	Intron (NM_021325.3/Cd200r1, intron 1 of 6)	16	44765736	44794977	29242	1	Cd200r1	NM_021325.3	12265	NM_021325.3	Cd200r1	0	106	9	97	131	33	98	70	35	35	33	10	23	67	24	43
chr16	46580001	46581000	1000	*	2.29609e-07	0.000302515	-25.0121	Distal Intergenic	16	46387665	46498560	110896	2	Nectin3	XR_001781847.1	-81441	NA	NA	NA	53	30	23	35	30	5	71	66	5	11	11	0	45	43	2
chr16	47361001	47362000	1000	*	0.000207386	0.0422263	20.5611	Distal Intergenic	16	47620481	47621744	1264	1	Gm6914	Gm6914	-258481	NA	NA	NA	56	43	13	59	43	16	66	37	29	37	21	16	78	39	39
chr16	47472001	47473000	1000	*	3.2018e-06	0.00238052	-28.7533	Distal Intergenic	16	47620481	47621744	1264	1	Gm6914	Gm6914	-147481	NA	NA	NA	49	29	20	49	32	17	22	18	4	24	24	0	34	31	3
chr16	48020001	48021000	1000	*	7.87845e-05	0.0228163	-21.5215	Distal Intergenic	16	48072232	48074490	2259	1	Gm7275	Gm7275	-51232	NA	NA	NA	31	21	10	37	30	7	41	40	1	21	20	1	20	19	1
chr16	49297001	49298000	1000	*	1.72973e-05	0.00807383	-30.9729	Promoter (<=1kb)	16	49296397	49298601	2205	2	Gm5407	Gm5407	601	Gm5407	Gm5407	0	32	13	19	17	13	4	17	16	1	5	4	1	18	17	1
chr16	50363001	50364000	1000	*	2.46689e-05	0.0103477	-25.5183	Promoter (<=1kb)	16	50196603	50364532	167930	2	Bbx	XM_006522554.3	532	NM_027444.3;XM_006522546.2;XM_011246009.1;XM_006522554.3;XM_006522547.3;XM_006522549.3;XM_006522543.3;XM_006522553.3;XM_006522555.3;XM_006522561.3;XM_011246005.2;XM_011246007.2;XM_006522545.3;XM_006522544.3;XM_006522548.3;XM_006522560.3;XM_006522563.3;XM_011246008.2;XM_017317130.1	Bbx;Bbx;Bbx;Bbx;Bbx;Bbx;Bbx;Bbx;Bbx;Bbx;Bbx;Bbx;Bbx;Bbx;Bbx;Bbx;Bbx;Bbx;Bbx	0;0;0;0;0;0;0;0;0;0;0;0;0;0;0;0;0;0;0	44	25	19	108	39	69	19	18	1	36	24	12	11	6	5
chr16	50433001	50434000	1000	*	1.22892e-07	0.000183695	-22.1514	Promoter (<=1kb)	16	50196889	50432461	235573	2	Bbx	XM_017317130.1	-540	NM_027444.3;XM_006522546.2;XM_011246009.1;XM_006522547.3;XM_006522549.3;XM_006522543.3;XM_006522553.3;XM_006522555.3;XM_006522561.3;XM_011246005.2;XM_011246007.2;XM_006522545.3;XM_006522544.3;XM_006522548.3;XM_006522560.3;XM_006522563.3;XM_011246008.2;XM_017317130.1	Bbx;Bbx;Bbx;Bbx;Bbx;Bbx;Bbx;Bbx;Bbx;Bbx;Bbx;Bbx;Bbx;Bbx;Bbx;Bbx;Bbx;Bbx	0;0;0;0;0;0;0;0;0;0;0;0;0;0;0;0;0;0	43	17	26	115	11	104	68	31	37	30	9	21	31	20	11
chr16	51117001	51118000	1000	*	1.97915e-09	6.66379e-06	24.2857	Distal Intergenic	16	51051225	51053660	2436	1	Gm32431	XR_876101.1	65776	NA	NA	NA	45	45	0	42	42	0	63	50	13	30	16	14	18	17	1
chr16	54805001	54806000	1000	*	3.23439e-07	0.000396858	-55	Distal Intergenic	16	54579532	54583554	4023	2	LOC108168273	LOC108168273	-221447	NA	NA	NA	10	5	5	5	2	3	16	16	0	5	5	0	23	23	0
chr16	55477001	55478000	1000	*	4.90118e-08	9.16109e-05	44.5195	Intron (XR_001782015.1/LOC108167374, intron 2 of 5)	16	55494731	55494797	67	1	Mir5118	NR_039578.1	-16731	XR_001782015.1;XR_001782016.1;XR_001782017.1	LOC108167374;LOC108167374;LOC108167374	0;0;0	68	49	19	73	54	19	15	5	10	8	1	7	58	23	35
chr16	55553001	55554000	1000	*	0.000155411	0.0353037	28.312	Intron (XR_001782016.1/LOC108167374, intron 1 of 5)	16	55420838	55582490	161653	2	LOC108167374	XR_001782016.1	28490	XR_001782016.1	LOC108167374	0	22	22	0	11	11	0	6	5	1	8	5	3	13	9	4
chr16	56144001	56145000	1000	*	0.000136374	0.0325199	-36.2753	Intron (XM_017317112.1/Senp7, intron 8 of 24)	16	56203840	56271884	68045	1	Impg2	XM_017316970.1	-58840	XM_017317112.1;XM_011245994.2;XM_006522456.3;XM_006522451.3;XM_006522453.3;XM_006522454.3;XM_006522452.3;XM_006522455.3;XM_017317111.1;NM_025483.4;NM_001304503.1	Senp7;Senp7;Senp7;Senp7;Senp7;Senp7;Senp7;Senp7;Senp7;Senp7;Senp7	0;0;0;0;0;0;0;0;0;0;68521	20	3	17	11	8	3	16	15	1	15	10	5	5	4	1
chr16	56550001	56551000	1000	*	0.000215545	0.0430895	-54.5166	Intron (XM_006522277.3/Abi3bp, intron 2 of 51)	16	56477899	56690135	212237	1	Abi3bp	XM_006522286.3	72102	XM_006522277.3;XM_006522254.2;XM_006522255.2;XM_006522256.2;XM_006522257.3;XM_006522260.1;XM_006522261.2;XM_006522263.1;XM_006522266.2;XM_006522267.3;XM_006522269.2;XM_006522271.2;XM_006522273.1;XM_006522275.1;XM_006522251.1;XM_006522252.1;XM_006522253.1;XM_006522258.1;XM_006522259.1;XM_006522262.1;XM_006522264.1;XM_006522265.1;XM_006522268.1;XM_006522270.1;XM_006522272.2;XM_006522274.1;XM_006522…	Abi3bp;Abi3bp;Abi3bp;Abi3bp;Abi3bp;Abi3bp;Abi3bp;Abi3bp;Abi3bp;Abi3bp;Abi3bp;Abi3bp;Abi3bp;Abi3bp;Abi3bp;Abi3bp;Abi3bp;Abi3bp;Abi3bp;Abi3bp;Abi3bp;Abi3bp;Abi3bp;Abi3bp;Abi3bp;Abi3bp;Abi3bp;Abi3bp;Abi3bp;Abi3bp;Abi3bp;Abi3bp;Abi3bp;Abi3bp;Abi3bp;Abi3bp;Abi3bp;Abi3bp;Abi3bp;Abi3bp;Abi3bp;Abi3bp;Abi3bp	0;0;0;0;0;0;0;0;0;0;0;0;0;0;0;0;0;0;0;0;0;0;0;0;0;0;0;0;0;0;0;0;0;0;0;0;0;0;0;0;0;0;0	5	1	4	14	8	6	46	40	6	5	5	0	13	12	1
chr16	56655001	56656000	1000	*	0.000191378	0.0401716	21.784	Intron (XM_006522277.3/Abi3bp, intron 47 of 51)	16	56690614	56717392	26779	2	Tfg	XM_006521982.3	61392	XM_006522277.3;XM_006522254.2;XM_006522255.2;XM_006522256.2;XM_006522257.3;XM_006522260.1;XM_006522261.2;XM_006522263.1;XM_006522266.2;XM_006522267.3;XM_006522269.2;XM_006522271.2;XM_006522273.1;XM_006522275.1;XM_006522251.1;XM_006522252.1;XM_006522253.1;XM_006522258.1;XM_006522259.1;XM_006522262.1;XM_006522264.1;XM_006522265.1;XM_006522268.1;XM_006522270.1;XM_006522272.2;XM_006522274.1;XM_006522…	Abi3bp;Abi3bp;Abi3bp;Abi3bp;Abi3bp;Abi3bp;Abi3bp;Abi3bp;Abi3bp;Abi3bp;Abi3bp;Abi3bp;Abi3bp;Abi3bp;Abi3bp;Abi3bp;Abi3bp;Abi3bp;Abi3bp;Abi3bp;Abi3bp;Abi3bp;Abi3bp;Abi3bp;Abi3bp;Abi3bp;Abi3bp;Abi3bp;Abi3bp;Abi3bp;Abi3bp;Abi3bp;Abi3bp;Abi3bp;Abi3bp;Abi3bp;Abi3bp;Abi3bp;Abi3bp;Abi3bp;Abi3bp;Abi3bp;Abi3bp	0;0;0;0;0;0;0;0;0;0;0;0;0;0;0;0;0;0;0;0;0;0;0;0;0;0;0;0;0;0;0;0;0;0;0;0;0;0;0;0;0;0;0	35	20	15	111	85	26	44	21	23	16	5	11	32	18	14
chr16	56986001	56987000	1000	*	0.000179	0.0385444	-37.037	Distal Intergenic	16	56914100	56928197	14098	2	Lnp1	XM_006522828.3	-57804	NA	NA	NA	9	7	2	20	4	16	5	5	0	5	4	1	36	28	8
chr16	57058001	57059000	1000	*	1.88061e-05	0.00857041	-26.5909	Intron (NM_183281.2/Tmem45a2, intron 2 of 6)	16	57036967	57071346	34380	2	Tmem45a2	NM_183281.2	12346	NM_183281.2;XM_017317126.1	Tmem45a2;Tmem45a2	0;0	34	26	8	59	35	24	20	19	1	5	5	0	78	69	9
chr16	57383001	57384000	1000	*	8.19873e-06	0.00468231	27.7688	Intron (NM_001040397.4/Filip1l, intron 1 of 4)	16	57353277	57572804	219528	1	Filip1l	NM_001040397.4	29724	NM_025599.3;XM_017317115.1;NM_001040397.4	Cmss1;Cmss1;Filip1l	0;0;0	10	10	0	27	27	0	31	23	8	30	24	6	32	20	12
chr16	58399001	58400000	1000	*	4.70992e-05	0.0162187	32.8451	Distal Intergenic	16	58403621	58407520	3900	2	4930461C15Rik	XR_876121.1	7520	XR_876121.1;XR_384910.1;XR_384911.1;XR_384912.1	4930461C15Rik;4930461C15Rik;4930461C15Rik;4930461C15Rik	7520;8342;8342;8342	18	18	0	5	5	0	36	23	13	15	7	8	11	10	1
chr16	58401001	58402000	1000	*	0.000255661	0.0478318	-46.6667	Downstream (1-2kb)	16	58403621	58407520	3900	2	4930461C15Rik	XR_876121.1	5520	XR_876121.1;XR_384910.1;XR_384911.1;XR_384912.1	4930461C15Rik;4930461C15Rik;4930461C15Rik;4930461C15Rik	5520;6342;6342;6342	5	2	3	5	3	2	20	18	2	8	8	0	27	27	0
chr16	58949001	58950000	1000	*	0.000183743	0.0391873	30.73	Intron (XM_017316985.1/Olfr183, intron 1 of 1)	16	58929418	59000616	71199	1	Olfr183	XM_017316985.1	19583	XM_017316985.1	Olfr183	0	38	28	10	43	24	19	29	9	20	22	6	16	48	21	27
chr16	59457001	59458000	1000	*	4.84716e-05	0.016537	30.3398	Promoter (<=1kb)	16	59457584	59460790	3207	1	Orai2-ps	Orai2-ps	0	NM_001081190.1;Orai2-ps	Gabrr3;Orai2-ps	0;0	20	11	9	25	18	7	42	21	21	77	15	62	20	6	14
chr16	59617001	59618000	1000	*	6.10541e-05	0.0192357	-25.7895	Intron (NM_019665.3/Arl6, intron 7 of 7)	16	59492088	59601509	109422	2	Crybg3	XM_006522095.3	-15492	NM_019665.3;XM_006522398.3	Arl6;Arl6	0;0	19	13	6	10	8	2	5	5	0	22	22	0	16	16	0
chr16	59847001	59848000	1000	*	3.21105e-05	0.0124901	-21.6716	Intron (XM_006521787.2/Epha6, intron 12 of 18)	16	59613321	59639411	26091	2	Arl6	XM_006522398.3	-207590	XM_006521787.2;NM_007938.2	Epha6;Epha6	0;0	39	7	32	47	11	36	32	19	13	14	1	13	38	23	15
chr16	62683001	62684000	1000	*	8.97966e-06	0.00503582	-25.4091	Distal Intergenic	16	62716955	62718810	1856	1	Gm9816	Gm9816	-32955	NA	NA	NA	68	17	51	25	14	11	44	32	12	20	11	9	10	7	3
chr16	63222001	63223000	1000	*	2.13666e-05	0.00937541	-38.1654	Distal Intergenic	16	63211300	63217284	5985	2	Gm33912	XR_384921.3	-4717	XR_384921.3	Gm33912	-4717	15	1	14	26	2	24	31	10	21	29	8	21	21	16	5
chr16	63989001	63990000	1000	*	0.00020606	0.0420873	-41.2698	Distal Intergenic	16	63545218	63864157	318940	2	Epha3	NM_010140.3	-124844	NA	NA	NA	7	2	5	6	5	1	24	22	2	13	13	0	16	16	0
chr16	64853001	64854000	1000	*	9.41904e-05	0.0257421	34.8539	Promoter (<=1kb)	16	64852085	64859491	7407	1	Cggbp1	NM_178647.2	916	XM_006521658.2;NM_178647.2;XM_006522586.2;XM_011246018.2;XM_011246020.1	Cggbp1;Cggbp1;Zfp654;Zfp654;Zfp654	0;0;-1124;-1003;-1124	43	16	27	20	15	5	34	10	24	23	4	19	59	10	49
chr16	65084001	65085000	1000	*	1.95113e-05	0.00877308	-22.4776	Intron (NM_008310.3/Htr1f, intron 1 of 2)	16	64924729	65105784	181056	2	Htr1f	NM_008310.3	20784	NM_008310.3	Htr1f	0	121	30	91	11	3	8	26	14	12	47	12	35	65	43	22
chr16	65629001	65630000	1000	*	6.75574e-07	0.00071565	22.9848	Distal Intergenic	16	65562791	65563519	729	1	Gm36457	XR_001781963.1	66210	NA	NA	NA	45	16	29	116	34	82	47	4	43	73	2	71	117	20	97
chr16	65664001	65665000	1000	*	1.65796e-06	0.00142192	-62.6515	Distal Intergenic	16	65723742	65735346	11605	1	Gm41469	XR_876146.1	-58742	NA	NA	NA	10	3	7	11	4	7	5	5	0	12	12	0	8	7	1
chr16	67101001	67102000	1000	*	9.61707e-05	0.026034	32.3014	Intron (XM_006523026.3/Cadm2, intron 1 of 10)	16	67443102	67446021	2920	2	9330155M09Rik	XR_876148.2	344021	XM_006523026.3;XM_006523028.3;XM_011246129.2;XM_011246128.2;XR_001781826.1;NM_001145977.1;NM_178721.4	Cadm2;Cadm2;Cadm2;Cadm2;Cadm2;Cadm2;Cadm2	0;0;0;0;0;0;0	62	47	15	69	52	17	33	8	25	17	6	11	64	45	19
chr16	67654001	67655000	1000	*	0.000236901	0.0457339	-20.0322	Distal Intergenic	16	66655416	67621202	965787	2	Cadm2	XR_001781826.1	-32799	NA	NA	NA	58	27	31	64	31	33	57	34	23	61	46	15	117	79	38
chr16	70564001	70565000	1000	*	2.39777e-07	0.000311282	-21.6591	Intron (NM_028803.4/Gbe1, intron 15 of 15)	16	70616425	70624822	8398	1	D16Ertd519e	NR_040474.1	-51425	NM_028803.4	Gbe1	0	157	27	130	97	31	66	42	22	20	21	8	13	85	41	44
chr16	72141001	72142000	1000	*	2.5818e-05	0.010673	-21.0714	Intron (XM_006522960.3/Robo1, intron 1 of 31)	16	72226383	72234327	7945	2	8030451O07Rik	NR_131115.1	92327	XM_006522960.3;XM_006522963.3	Robo1;Robo1	0;0	20	15	5	35	29	6	33	33	0	21	21	0	7	7	0
chr16	72381001	72382000	1000	*	0.000224347	0.0442324	-21.1278	Intron (XM_006522960.3/Robo1, intron 2 of 31)	16	72308328	73047491	739164	1	Robo1	XM_017316894.1	72673	XM_006522960.3;XM_006522963.3;XM_006522961.2;XM_017316894.1	Robo1;Robo1;Robo1;Robo1	0;0;0;0	62	31	31	69	50	19	49	36	13	46	36	10	43	41	2
chr16	72444001	72445000	1000	*	0.000184668	0.0392995	-44.1708	Intron (XM_006522960.3/Robo1, intron 2 of 31)	16	72471368	73047491	576124	1	Robo1	XM_011246105.2	-26368	XM_006522960.3;XM_006522963.3;XM_006522961.2;XM_017316894.1	Robo1;Robo1;Robo1;Robo1	0;0;0;0	48	17	31	68	22	46	16	14	2	5	5	0	30	14	16
chr16	72893001	72894000	1000	*	3.76613e-05	0.0139486	-27.2018	Intron (XM_006522960.3/Robo1, intron 4 of 31)	16	73072346	73095918	23573	1	4930500H12Rik	XR_876156.1	-178346	XM_006522960.3;XM_006522963.3;XM_006522961.2;XM_017316894.1;XM_011246105.2;XM_011246106.2;XM_006522958.2;XM_006522957.2;XM_006522964.3;XM_017316893.1;XM_006522962.3;XM_006522965.1;NM_019413.2	Robo1;Robo1;Robo1;Robo1;Robo1;Robo1;Robo1;Robo1;Robo1;Robo1;Robo1;Robo1;Robo1	0;0;0;0;0;0;0;0;0;0;0;0;0	57	35	22	56	28	28	40	29	11	38	32	6	25	23	2
chr16	73393001	73394000	1000	*	6.67742e-08	0.000116195	32.9464	Intron (XR_876153.1/4930500H12Rik, intron 3 of 3)	16	73481105	73508146	27042	1	Gm41472	XR_876158.1	-87105	XR_876153.1	4930500H12Rik	0	23	22	1	37	32	5	56	21	35	18	14	4	22	13	9
chr16	75560001	75561000	1000	*	8.75636e-06	0.00492761	-34.7826	Exon (NM_001252513.1/Lipi, exon 7 of 11)	16	75540514	75586061	45548	2	Lipi	NM_001252513.1	25061	NM_001252513.1;XM_011246134.1;XM_011246133.1;XM_011246135.1	Lipi;Lipi;Lipi;Lipi	0;0;0;0	34	16	18	28	15	13	26	21	5	14	13	1	60	49	11
chr16	75684001	75685000	1000	*	1.61816e-05	0.00769089	24.1968	Promoter (<=1kb)	16	75645638	75683274	37637	2	Gm41474	XR_876161.2	-727	XR_384965.1;XR_876161.2	Gm30162;Gm41474	0;-727	60	59	1	6	6	0	13	12	1	29	20	9	11	7	4
chr16	76403001	76404000	1000	*	2.57075e-05	0.0106361	-33.3228	Promoter (<=1kb)	16	76403206	76403711	506	2	Gm9843	Gm9843	0	Gm9843	Gm9843	0	94	19	75	141	41	100	37	19	18	47	20	27	10	8	2
chr16	76679001	76680000	1000	*	1.30417e-05	0.0065345	-24.0909	Distal Intergenic	16	76752229	76763173	10945	2	Gm30790	XR_384976.2	83173	NA	NA	NA	30	7	23	11	9	2	75	60	15	5	4	1	30	21	9
chr16	78056001	78057000	1000	*	3.31224e-08	6.73219e-05	-49.1341	Intron (XR_384987.2/Gm31431, intron 2 of 2)	16	78035491	78089711	54221	2	Gm31431	XR_384987.2	32711	XR_384987.2	Gm31431	0	15	2	13	40	8	32	54	28	26	13	10	3	51	35	16
chr16	78409001	78410000	1000	*	1.68954e-05	0.00794331	-40.5051	Distal Intergenic	16	78359860	78377181	17322	2	Btg3	NM_001297747.1	-31820	NA	NA	NA	33	18	15	10	4	6	6	5	1	22	22	0	5	4	1
chr16	78511001	78512000	1000	*	7.04739e-06	0.00418491	-23.628	Distal Intergenic	16	78560316	78564869	4554	1	4930478L05Rik	NR_040569.1	-48316	NA	NA	NA	57	29	28	97	48	49	95	62	33	37	28	9	82	66	16
chr16	78710001	78711000	1000	*	8.84167e-06	0.00497002	-31.6071	Exon (XR_876183.1/4930570E03Rik, exon 3 of 3)	16	78694989	78761063	66075	1	4930570E03Rik	XR_384994.2	15012	XR_384993.2;XR_384995.2;XR_876183.1;XR_384994.2	4930570E03Rik;4930570E03Rik;4930570E03Rik;4930570E03Rik	15012;15012;0;0	17	6	11	38	13	25	49	41	8	31	13	18	49	36	13
chr16	80036001	80037000	1000	*	0.000193341	0.040448	34.3434	Distal Intergenic	16	79999382	80000544	1163	1	1700066C05Rik	XM_001473318.2	36619	NA	NA	NA	11	11	0	11	11	0	6	4	2	21	14	7	11	7	4
chr16	80602001	80603000	1000	*	0.000103077	0.0271327	-21.4065	Distal Intergenic	16	80726669	80727153	485	1	Gm19867	Gm19867	-123669	NA	NA	NA	51	37	14	59	40	19	69	59	10	21	21	0	65	58	7
chr16	83271001	83272000	1000	*	0.000174474	0.0379538	-24.1904	Distal Intergenic	16	84033196	84057452	24257	2	Gm41481	XR_876187.1	785452	NA	NA	NA	9	7	2	53	31	22	12	12	0	19	17	2	16	14	2
chr16	85870001	85871000	1000	*	2.96618e-19	5.20383e-15	-55.138	Exon (NM_011782.2/Adamts5, exon 4 of 8)	16	85899909	85905197	5289	1	LOC108168297	XR_001781962.1	-28909	NM_011782.2	Adamts5	0	42	17	25	102	38	64	35	30	5	27	26	1	28	28	0
chr16	87664001	87665000	1000	*	5.9516e-08	0.000105525	-24.1029	Distal Intergenic	16	87698954	87733346	34393	1	Bach1	NM_007520.2	-33954	NA	NA	NA	47	22	25	27	26	1	54	48	6	52	51	1	21	21	0
chr16	88147001	88148000	1000	*	3.82455e-05	0.0140673	26.3636	Intron (NM_010348.3/Grik1, intron 1 of 15)	16	88134754	88142516	7763	2	LOC108168291	XR_001781939.1	-4485	NM_010348.3;NM_146072.4;XM_006522915.3;XM_017316880.1;XM_006522914.3;XM_006522918.3;XM_006522919.3;XR_384929.3;XR_384930.3;XM_006522916.3;XM_006522917.3;XM_006522921.3;XM_006522920.3;XR_001781939.1	Grik1;Grik1;Grik1;Grik1;Grik1;Grik1;Grik1;Grik1;Grik1;Grik1;Grik1;Grik1;Grik1;LOC108168291	0;0;0;0;0;0;0;0;0;0;0;0;0;-4485	38	38	0	27	27	0	11	10	1	5	4	1	8	4	4
chr16	88372001	88373000	1000	*	8.99972e-12	5.88217e-08	21.4784	Intron (XR_876220.1/Gm33255, intron 2 of 2)	16	88352647	88381817	29171	2	Gm33255	XR_876220.1	8817	XR_876220.1;XR_876221.1;XR_385025.1	Gm33255;Gm33255;Gm33255	0;0;0	234	91	143	218	113	105	145	34	111	161	31	130	266	77	189
chr16	90673001	90674000	1000	*	7.21383e-05	0.021569	35.5214	Downstream (1-2kb)	16	90675512	90677771	2260	2	Gm36169	XR_385041.3	3771	XR_385041.3;XR_876236.2	Gm36169;Gm36169	3771;3771	25	19	6	22	22	0	26	8	18	15	13	2	5	2	3
chr16	90871001	90872000	1000	*	0.000149877	0.0345976	-27.331	Intron (NM_001316760.1/Eva1c, intron 5 of 9)	16	90834365	90851185	16821	2	Gm36363	XR_876239.1	-19816	NM_001316760.1;XM_017317131.1;XM_006523085.3;NM_001199210.2;NM_001316761.1;NM_027627.3;NR_133572.1;NR_133573.1;XM_017317132.1	Eva1c;Eva1c;Eva1c;Eva1c;Eva1c;Eva1c;Eva1c;Eva1c;Eva1c	0;0;0;0;0;0;0;0;0	33	23	10	39	23	16	15	15	0	12	9	3	17	17	0
chr16	90933001	90934000	1000	*	1.06018e-07	0.000163861	-39.8184	Promoter (<=1kb)	16	90925811	90934849	9039	2	1110004E09Rik	NM_026502.2	849	NM_026502.2;XM_006522846.2;XM_011246089.2;XM_011246083.1;XM_011246084.1;XM_011246081.2;XM_011246082.2;XM_017316836.1;XM_006522837.3;XM_011246079.2;XM_011246080.2;XM_011246078.2;XM_011246075.2;XM_011246077.2;XM_011246076.2;XM_017316840.1;XM_017316839.1;XM_017316841.1;XM_011246088.2;XM_017316838.1;XM_017316837.1;XM_011246085.2;XR_876128.2;NM_001164483.1;NM_001045515.1	1110004E09Rik;Synj1;Synj1;Synj1;Synj1;Synj1;Synj1;Synj1;Synj1;Synj1;Synj1;Synj1;Synj1;Synj1;Synj1;Synj1;Synj1;Synj1;Synj1;Synj1;Synj1;Synj1;Synj1;Synj1;Synj1	0;37434;41445;77095;77095;77876;77888;77889;77890;77891;77891;77893;77894;77894;78021;78130;78131;78131;78132;78132;78133;78134;78134;77308;77095	54	23	31	33	10	23	37	26	11	26	22	4	46	34	12
chr16	91268001	91269000	1000	*	0.000221733	0.0439162	-23.2834	Promoter (<=1kb)	16	91269769	91271939	2171	1	Olig1	NM_016968.4	-769	NM_016968.4	Olig1	-769	41	19	22	57	7	50	43	25	18	52	21	31	27	16	11
chr16	91947001	91948000	1000	*	7.10409e-05	0.0213785	-48.362	Distal Intergenic	16	91954010	91966230	12221	1	D430001F17Rik	XR_876250.1	-6010	NA	NA	NA	74	17	57	120	28	92	5	3	2	5	5	0	11	6	5
chr16	91977001	91978000	1000	*	1.85701e-06	0.00155659	-26.6768	Distal Intergenic	16	91960825	91966230	5406	1	D430001F17Rik	XR_876248.1	16176	NA	NA	NA	74	12	62	106	41	65	27	14	13	46	26	20	100	54	46
chr16	92034001	92035000	1000	*	7.63191e-05	0.0223391	31.3753	Distal Intergenic	16	92058322	92087473	29152	1	Slc5a3	NM_017391.3	-23322	NA	NA	NA	25	23	2	43	40	3	15	12	3	16	2	14	22	20	2
chr16	92457001	92458000	1000	*	3.38703e-07	0.000411762	36.6809	Promoter (<=1kb)	16	92457527	92464233	6707	1	LOC108168294	XR_001781958.1	0	XR_001781958.1;XR_001781959.1;NM_001081549.2	LOC108168294;LOC108168295;Rcan1	0;4526;0	15	15	0	15	15	0	52	41	11	20	20	0	36	4	32
chr16	93054001	93055000	1000	*	5.77796e-05	0.0185013	-23.8334	Distal Intergenic	16	93127826	93132040	4215	2	Gm30474	XR_385062.2	77040	NA	NA	NA	48	20	28	63	53	10	44	43	1	11	9	2	31	25	6
chr16	93307001	93308000	1000	*	2.85981e-05	0.0114944	21.0744	Distal Intergenic	16	93262363	93263467	1105	1	Gm30588	XR_385064.3	44638	NA	NA	NA	57	48	9	72	56	16	102	63	39	56	23	33	39	30	9
chr16	93833001	93834000	1000	*	0.000266467	0.049046	-38.9182	Promoter (<=1kb)	16	93808397	93833516	25120	2	Gm30881	XR_385069.3	0	XR_385069.3;XR_876266.2;NM_001045529.3;XM_006523060.2	Gm30881;Gm30881;Morc3;Morc3	0;0;0;0	31	2	29	10	0	10	11	7	4	15	7	8	31	5	26
chr16	96877001	96878000	1000	*	0.000107393	0.0279088	20.619	Intron (XM_006522886.2/Dscam, intron 3 of 33)	16	96919370	96921130	1761	1	Gm32432	XR_001781898.1	-41370	XM_006522886.2;NM_031174.4;XM_011246093.1	Dscam;Dscam;Dscam	0;0;0	21	20	1	38	38	0	16	12	4	24	24	0	25	14	11
chr17	3273001	3274000	1000	*	9.85605e-05	0.0263489	-21.1018	Promoter (1-2kb)	17	3254258	3275815	21558	2	Gm34035	XR_001782146.1	1815	XR_001782146.1;XR_001782144.1;XR_001782145.1	Gm34035;Gm34035;Gm34035	0;0;0	15	8	7	59	2	57	50	22	28	41	10	31	10	8	2
chr17	3698001	3699000	1000	*	8.57205e-07	0.000862379	-36.3458	Promoter (1-2kb)	17	3635240	3696261	61022	2	Nox3	NM_198958.2	-1740	NM_198958.2	Nox3	-1740	52	21	31	34	18	16	56	42	14	14	11	3	22	21	1
chr17	4107001	4108000	1000	*	5.56465e-05	0.0180899	-26.0959	Distal Intergenic	17	4119446	4122102	2657	2	4930548J01Rik	NR_045462.1	14102	NA	NA	NA	114	59	55	54	15	39	38	23	15	73	44	29	56	43	13
chr17	4926001	4927000	1000	*	3.3918e-08	6.87992e-05	-49.5098	Distal Intergenic	17	4908010	4914351	6342	1	Gm34507	XM_017317735.1	17991	NA	NA	NA	17	13	4	18	3	15	24	24	0	10	10	0	17	15	2
chr17	5400001	5401000	1000	*	9.16068e-06	0.00510129	-36.3703	Distal Intergenic	17	5412064	5413483	1420	1	Gm29050	XR_001782246.1	-11064	NA	NA	NA	6	3	3	22	16	6	38	37	1	34	34	0	24	23	1
chr17	5974001	5975000	1000	*	5.22872e-06	0.0033733	-31.25	Promoter (<=1kb)	17	5975132	6040138	65007	1	Synj2	XM_017317373.1	-132	NM_001113352.2;NM_001113353.2;XM_006523204.2;XM_006523203.1;XM_006523212.2;XM_006523206.2;XM_006523208.3;XR_385128.2;XR_385129.3;XM_006523205.3;XM_017317373.1;NM_001113351.1;NM_011523.2	Synj2;Synj2;Synj2;Synj2;Synj2;Synj2;Synj2;Synj2;Synj2;Synj2;Synj2;Synj2;Synj2	0;0;0;0;0;0;0;0;0;0;-132;-586;-586	10	5	5	8	7	1	58	58	0	5	5	0	6	6	0
chr17	6873001	6874000	1000	*	4.18327e-05	0.014967	-20.5839	Distal Intergenic	17	6895259	6895279	21	2	Mir692-1	NA	21279	NA	NA	NA	46	35	11	49	32	17	45	43	2	25	21	4	35	33	2
chr17	7171001	7172000	1000	*	1.89648e-05	0.00862038	21.5207	Promoter (<=1kb)	17	7170205	7303315	133111	1	Rps6ka2	XM_006523200.1	796	XM_006523199.3;XM_006523201.1;XM_006523198.3;NM_011299.4;XM_006523200.1	Rps6ka2;Rps6ka2;Rps6ka2;Rps6ka2;Rps6ka2	0;0;0;0;0	31	18	13	28	20	8	31	3	28	5	2	3	5	4	1
chr17	7683001	7684000	1000	*	3.96718e-05	0.0144629	-47.5644	Distal Intergenic	17	7631809	7637736	5928	2	Gm33158	XR_385182.2	-45265	NA	NA	NA	29	9	20	18	5	13	6	5	1	13	11	2	27	17	10
chr17	7722001	7723000	1000	*	1.52477e-05	0.00734831	23.1417	Distal Intergenic	17	7738568	7804974	66407	2	Fndc1	NM_001081416.1	81974	NA	NA	NA	78	51	27	66	33	33	41	16	25	75	22	53	34	12	22
chr17	7944001	7945000	1000	*	7.29661e-06	0.00429212	57.7673	Promoter (<=1kb)	17	7945614	7979556	33943	1	Rsph3a	NM_025789.5	-614	XR_001782310.1;XR_001782308.1;XR_001782309.1;XR_001782315.1;NM_025789.5	Gm1604a;Gm1604a;Gm1604a;Gm1604a;Rsph3a	0;0;0;0;-614	6	6	0	13	12	1	47	13	34	10	2	8	40	27	13
chr17	9301001	9302000	1000	*	4.78983e-08	9.0082e-05	20.9633	Distal Intergenic	17	9320196	9321397	1202	2	Gm8492	Gm8492	19397	NA	NA	NA	29	28	1	56	55	1	20	16	4	27	25	2	60	34	26
chr17	9421001	9422000	1000	*	3.99457e-06	0.00280321	-21.7124	Exon (Gm17748/Gm17748, exon 2 of 2)	17	9421878	9429394	7517	2	Gm17748	Gm17748	7394	Gm17748	Gm17748	0	40	10	30	67	21	46	52	33	19	30	3	27	63	48	15
chr17	11068001	11069000	1000	*	8.18422e-07	0.000833343	29.0909	Intron (NM_001317726.1/Park2, intron 2 of 6)	17	11118480	11134237	15758	2	Gm41526	XR_876407.1	65237	NM_001317726.1;NM_016694.4;XM_017317574.1;XM_017317575.1;XM_017317572.1;XM_006523336.3;XR_001782089.1;XR_001782090.1;XM_006523339.2;XM_017317576.1	Park2;Park2;Park2;Park2;Park2;Park2;Park2;Park2;Park2;Park2	0;0;0;0;0;0;0;0;0;0	37	37	0	5	5	0	10	9	1	21	21	0	22	5	17
chr17	12091001	12092000	1000	*	0.000208857	0.0423389	46.1603	Distal Intergenic	17	12118709	12219649	100941	1	Agpat4	XM_006523345.2	-26709	NA	NA	NA	29	20	9	30	24	6	18	10	8	5	0	5	17	5	12
chr17	13486001	13487000	1000	*	2.03084e-06	0.00167423	24.1765	Downstream (<1kb)	17	13516724	13518874	2151	1	Gm16050	Gm16050	-29724	NR_045436.1;NR_045437.1	2700054A10Rik;2700054A10Rik	67094;67094	37	37	0	30	30	0	147	124	23	15	9	6	77	64	13
chr17	14204001	14205000	1000	*	1.54116e-06	0.00134834	-24.5385	Promoter (<=1kb)	17	14195230	14204337	9108	2	Dact2	XM_006524227.3	0	NM_172826.3;XM_006524227.3;XR_001782252.1;XR_001782253.1	Dact2;Dact2;Gm34510;Gm34510	-170;0;0;-1830	65	10	55	105	19	86	20	11	9	29	3	26	53	31	22
chr17	14245001	14246000	1000	*	7.90335e-05	0.0228478	23.6765	Downstream (<1kb)	17	14249738	14266481	16744	1	Gm34567	XR_385411.3	-3738	XR_385411.3;XR_385410.3;XR_876622.2;XR_385414.3;XR_876625.2;XR_385412.3;XR_385413.3;XR_876623.2;XR_385416.2	Gm34567;Gm34567;Gm34567;Gm34567;Gm34567;Gm34567;Gm34567;Gm34567;Gm34772	-3738;-3741;-3741;-3741;-3779;-3937;-3937;-3937;7614	27	24	3	63	61	2	43	34	9	16	9	7	18	13	5
chr17	14510001	14511000	1000	*	3.57979e-08	7.1453e-05	-26.621	Intron (XR_385417.2/Gm34916, intron 2 of 2)	17	14503452	14522426	18975	2	Gm34916	XR_385417.2	11426	XR_385417.2	Gm34916	0	22	18	4	50	11	39	52	40	12	37	30	7	58	45	13
chr17	14935001	14936000	1000	*	1.03551e-05	0.00554936	-36.9935	Promoter (<=1kb)	17	14840891	14934794	93904	2	Wdr27	XM_017317639.1	-207	XM_006524929.3;XM_011246612.2;NM_175173.3;XM_006524928.1;XR_001782112.1;XM_017317639.1;XM_006524926.3;XM_006524925.3;XM_017317640.1;XM_011246611.1;XM_006524932.1;XM_011246616.1;XM_011246614.1;XM_006524931.2;XM_011246617.2;XM_017317641.1;XM_017317642.1;XM_006524936.1	Wdr27;Wdr27;Wdr27;Wdr27;Wdr27;Wdr27;Wdr27;Wdr27;Wdr27;Wdr27;Wdr27;Wdr27;Wdr27;Wdr27;Wdr27;Wdr27;Wdr27;Wdr27	0;0;0;0;0;-207;0;0;0;0;0;0;0;0;0;0;0;0	15	3	12	51	11	40	27	18	9	15	9	6	15	7	8
chr17	15687001	15688000	1000	*	2.9494e-05	0.0117788	-22.2562	Distal Intergenic	17	15702465	15704708	2244	2	LOC108168347	XR_001782213.1	16708	NA	NA	NA	44	30	14	52	39	13	21	21	0	31	27	4	54	51	3
chr17	15723001	15724000	1000	*	8.34235e-05	0.0236394	40.9119	Intron (NM_007690.3/Chd1, intron 2 of 35)	17	15704967	15772612	67646	1	Chd1	NM_007690.3	18034	NM_007690.3	Chd1	0	19	12	7	22	22	0	39	16	23	10	2	8	41	25	16
chr17	19244001	19245000	1000	*	0.000221716	0.0439162	21.1155	Distal Intergenic	17	19279323	19304647	25325	1	Vmn2r-ps120	Vmn2r-ps120	-34323	NA	NA	NA	15	15	0	94	84	10	103	71	32	22	15	7	67	56	11
chr17	19591001	19592000	1000	*	4.5663e-06	0.00307288	23.1045	Exon (NM_001104563.1/Vmn2r101, exon 4 of 6)	17	19577231	19612317	35087	1	Vmn2r101	NM_001104563.1	13770	NM_001104563.1	Vmn2r101	0	44	42	2	47	43	4	57	40	17	51	32	19	55	43	12
chr17	19737001	19738000	1000	*	0.000186764	0.0395937	27.9211	Distal Intergenic	17	19773363	19812536	39174	1	Vmn2r103	NM_001104565.1	-35363	NA	NA	NA	27	25	2	43	32	11	28	18	10	37	17	20	46	26	20
chr17	20363001	20364000	1000	*	8.09614e-05	0.0231909	29.4829	Intron (NM_001104569.1/Vmn2r107, intron 5 of 5)	17	20345425	20375772	30348	1	Vmn2r107	NM_001104569.1	17576	NM_001104569.1	Vmn2r107	0	27	24	3	40	31	9	38	18	20	55	39	16	49	21	28
chr17	20517001	20518000	1000	*	1.29136e-06	0.00117685	21.9335	Distal Intergenic	17	20502299	20503195	897	1	Vmn1r225	NM_134194.1	14702	NA	NA	NA	70	60	10	79	62	17	72	39	33	48	35	13	88	47	41
chr17	21708001	21709000	1000	*	1.29542e-05	0.00651095	-32.7778	Promoter (<=1kb)	17	21707741	21725636	17896	1	Zfp760	NM_001008501.2	260	NM_001008501.2	Zfp760	0	25	0	25	17	0	17	15	2	13	16	4	12	10	6	4
chr17	21845001	21846000	1000	*	6.50258e-06	0.00396016	30.3562	Promoter (<=1kb)	17	21816876	21845759	28884	2	Zfp820	NM_029281.2	0	XR_385461.2;NM_029281.2	Gm31758;Zfp820	0;0	10	3	7	23	10	13	85	0	85	5	0	5	47	9	38
chr17	23534001	23535000	1000	*	0.000273765	0.0498347	-28.0239	Promoter (<=1kb)	17	23533962	23534034	73	1	n-TKctt13	rna94344	39	XR_876658.2;XR_876659.2;rna94345;rna94344	Gm41543;Gm41543;n-TKctt12;n-TKctt13	3674;3674;404;0	12	0	12	5	0	5	20	7	13	13	1	12	58	24	34
chr17	23924001	23925000	1000	*	3.62518e-09	1.09406e-05	-62.3552	Promoter (<=1kb)	17	23913034	23925979	12946	2	Gm41545	XR_876668.2	979	XM_006524740.1;NM_001077633.1;XR_876668.2	Dcpp3;Dcpp3;Gm41545	7303;6543;0	5	0	5	65	4	61	27	8	19	6	4	2	12	12	0
chr17	24427001	24428000	1000	*	7.80168e-07	0.000801817	-22.9819	Promoter (<=1kb)	17	24426683	24439316	12634	1	Eci1	NM_010023.4	318	NM_010023.4;XM_017317362.1;NM_001080127.1;NM_001080128.1;NM_009070.2	Eci1;Rnps1;Rnps1;Rnps1;Rnps1	0;12359;12326;12326;12326	67	29	38	17	17	0	12	12	0	15	15	0	31	26	5
chr17	24654001	24655000	1000	*	6.68236e-08	0.000116195	55.4191	Downstream (2-3kb)	17	24657330	24658425	1096	2	Npw	NM_001099664.1	3425	NM_001099664.1;XM_006524791.3;XM_017317608.1;NM_023055.2	Npw;Slc9a3r2;Slc9a3r2;Slc9a3r2	3425;-3663;-3662;-3696	38	12	26	10	9	1	36	5	31	18	0	18	45	1	44
chr17	26095001	26096000	1000	*	2.7872e-08	5.89259e-05	-24.5497	Promoter (<=1kb)	17	26091734	26095519	3786	2	Nme4	XM_006524677.3	0	NM_011933.2;Gm8186;XM_006524677.3;NM_019731.1	Decr2;Gm8186;Nme4;Nme4	-4837;3257;0;0	50	2	48	57	0	57	15	3	12	19	6	13	57	16	41
chr17	26096001	26097000	1000	*	7.04321e-05	0.0212593	-68.5714	Promoter (<=1kb)	17	26091734	26095519	3786	2	Nme4	XM_006524677.3	-482	Gm8186;XM_006524677.3;NM_019731.1	Gm8186;Nme4;Nme4	2257;0;0	5	1	4	5	1	4	15	12	3	5	5	0	21	18	3
chr17	26477001	26478000	1000	*	4.65202e-05	0.0160692	-25	Intron (XR_385485.1/Gm34455, intron 1 of 2)	17	26467654	26490903	23250	2	Gm34455	XR_385485.1	12903	XR_385485.1;XR_385487.1;XR_385488.1;XR_385486.3;XR_876692.2;XR_876693.2;XR_876691.1;XR_876694.1	Gm34455;Gm34455;Gm34455;Gm34455;Gm34455;Gm34455;Gm34455;Gm34455	0;0;0;0;0;0;0;0	6	6	0	10	5	5	24	24	0	22	22	0	11	11	0
chr17	29882001	29883000	1000	*	1.50841e-07	0.000215488	-26.493	Intron (XM_006525040.3/Mdga1, intron 1 of 16)	17	29827958	29887882	59925	2	Mdga1	NM_001081160.1	4882	XM_006525040.3;XR_385375.3;XR_385376.3;XR_876562.2;XR_876563.2;NM_001081160.1;XM_006525041.3	Mdga1;Mdga1;Mdga1;Mdga1;Mdga1;Mdga1;Mdga1	0;0;0;0;0;0;0	34	19	15	5	4	1	49	45	4	39	38	1	67	63	4
chr17	30375001	30376000	1000	*	2.33712e-06	0.00185338	22.3317	Intron (NM_027060.1/Btbd9, intron 6 of 10)	17	30394825	30396180	1356	2	Gm6402	NR_030688.1	20180	NM_027060.1;NM_172618.2;XM_006524094.3;XM_011246395.2	Btbd9;Btbd9;Btbd9;Btbd9	0;0;0;0	24	24	0	47	47	0	14	8	6	16	16	0	29	22	7
chr17	30602001	30603000	1000	*	0.000107287	0.0278981	-43.8095	Promoter (<=1kb)	17	30602591	30603710	1120	1	LOC102631653	LOC102631653	0	NM_001113560.1;NM_025374.3;LOC102631653	Glo1;Glo1;LOC102631653	0;0;0	10	5	5	5	3	2	5	5	0	5	5	0	28	27	1
chr17	31563001	31564000	1000	*	9.17955e-20	1.69992e-15	-31.6993	Promoter (<=1kb)	17	31564721	31607691	42971	1	Pknox1	XM_006523854.2	-721	XM_006523854.2;XM_006523855.2;XM_006523856.3;XM_006523857.3;XM_006523858.1;NM_016670.3;NR_027493.1	Pknox1;Pknox1;Pknox1;Pknox1;Pknox1;Pknox1;Pknox1	-721;-721;-721;-721;-721;-773;-773	66	7	59	106	3	103	65	10	55	108	59	49	126	57	69
chr17	32750001	32751000	1000	*	8.90832e-08	0.000143221	58.649	Distal Intergenic	17	32730988	32731940	953	1	Gm6452	Gm6452	19013	NA	NA	NA	12	12	0	18	18	0	16	7	9	6	1	5	33	21	12
chr17	39209001	39210000	1000	*	2.72069e-05	0.0110888	23.006	Distal Intergenic	17	39073691	39077037	3347	2	Esp23	NM_001177582.1	-131964	NA	NA	NA	58	52	6	67	53	14	37	15	22	80	50	30	37	30	7
chr17	39844001	39845000	1000	*	0	0	21.3264	Promoter (1-2kb)	17	39846354	39848202	1849	1	Rn18s-rs5	Rn18s-rs5	-1354	XR_877120.2;Rn18s-rs5	LOC101056014;Rn18s-rs5	53385;0	23158	10396	12762	29112	16297	12815	21922	5301	16621	17376	7472	9904	11114	2239	8875
chr17	39846001	39847000	1000	*	0	0	24.026	Promoter (<=1kb)	17	39846354	39848202	1849	1	Rn18s-rs5	Rn18s-rs5	0	XR_877120.2;Rn18s-rs5	LOC101056014;Rn18s-rs5	51385;0	31226	18737	12489	42803	30813	11990	25622	10192	15430	25879	15660	10219	12943	3316	9627
chr17	39920001	39921000	1000	*	0.000213199	0.0428501	37.019	Distal Intergenic	17	39847647	39898385	50739	2	LOC101056014	XR_877120.2	-21616	NA	NA	NA	41	34	7	42	21	21	12	1	11	5	0	5	5	4	1
chr17	42381001	42382000	1000	*	6.48106e-05	0.0200466	-23.6606	Intron (XM_006524754.3/Ptchd4, intron 3 of 3)	17	42317000	42507742	190743	1	Ptchd4	XM_006524755.1	64001	XM_006524754.3;NM_028474.1;XM_006524752.2;XM_006524751.1;XM_006524753.1;XM_006524755.1	Ptchd4;Ptchd4;Ptchd4;Ptchd4;Ptchd4;Ptchd4	0;0;0;0;0;0	65	22	43	88	36	52	57	32	25	25	17	8	117	69	48
chr17	42953001	42954000	1000	*	5.7703e-05	0.0184886	46.8519	Distal Intergenic	17	43016555	43089188	72634	1	Tnfrsf21	NM_178589.3	-62555	NA	NA	NA	18	14	4	15	12	3	5	1	4	15	6	9	36	13	23
chr17	43012001	43013000	1000	*	1.12658e-05	0.0059076	-41.2879	Distal Intergenic	17	43016555	43089188	72634	1	Tnfrsf21	NM_178589.3	-3555	NM_178589.3	Tnfrsf21	-3555	22	2	20	10	5	5	21	21	0	11	11	0	16	2	14
chr17	43475001	43476000	1000	*	4.77824e-10	1.91887e-06	-28.7775	Exon (XM_006523751.3/Mep1a, exon 15 of 15)	17	43474329	43502773	28445	2	Mep1a	NM_008585.2	26773	XM_006523751.3;NM_008585.2	Mep1a;Mep1a	0;0	46	18	28	14	12	2	68	63	5	42	34	8	31	31	0
chr17	43518001	43519000	1000	*	3.55472e-05	0.013409	36.6422	Distal Intergenic	17	43474324	43504141	29818	2	Mep1a	XM_006523751.3	-13860	NA	NA	NA	17	16	1	10	7	3	16	3	13	5	4	1	16	6	10
chr17	44129001	44130000	1000	*	6.78599e-05	0.0207079	-34.8757	Distal Intergenic	17	44134664	44280169	145506	1	Clic5	XM_006524135.3	-4664	XM_006524135.3;XR_876802.2;XR_876803.2;XR_876805.2;XR_876806.2;XR_876808.1;XR_876804.1;XR_876809.2;XR_385588.2;XR_876807.1	Clic5;Gm34917;Gm34917;Gm34917;Gm34917;Gm34917;Gm34917;Gm34917;Gm34917;Gm34917	0;23022;23022;23022;23022;23016;23004;23004;13699;13699	53	20	33	25	18	7	13	12	1	13	10	3	6	6	0
chr17	44134001	44135000	1000	*	5.61603e-06	0.00355903	-20.1565	Promoter (<=1kb)	17	44134664	44280169	145506	1	Clic5	XM_006524135.3	0	XM_006524135.3	Clic5	0	43	11	32	56	8	48	37	26	11	5	2	3	10	1	9
chr17	44360001	44361000	1000	*	7.61323e-05	0.0223066	-40.3453	Distal Intergenic	17	44188572	44280168	91597	1	Clic5	NM_172621.2	171429	NA	NA	NA	26	7	19	48	17	31	15	15	0	10	6	4	44	24	20
chr17	45626001	45627000	1000	*	2.49626e-05	0.0104356	-29.3311	Distal Intergenic	17	45630191	45639618	9428	2	Capn11	XM_017317486.1	12618	XM_017317486.1;XM_011246479.2;NM_001013767.2	Capn11;Capn11;Capn11	12618;33073;32309	58	12	46	40	10	30	5	3	2	32	14	18	72	38	34
chr17	46143001	46144000	1000	*	8.19176e-07	0.000833343	44.4444	Promoter (<=1kb)	17	46129277	46144198	14922	2	Rsph9	NM_029338.3	198	NM_025649.3;XM_006525075.3;NM_029338.3;XM_006525074.3;XM_011246700.2	Mad2l1bp;Rsph9;Rsph9;Rsph9;Rsph9	9551;0;0;0;0	15	15	0	5	0	5	5	0	5	10	0	10	6	1	5
chr17	46461001	46462000	1000	*	8.02718e-05	0.0230798	-39.2635	Exon (XM_006523445.2/Ttbk1, exon 14 of 14)	17	46439488	46442350	2863	2	Gm5093	XM_017317766.1	-18651	NM_001162864.1;XM_006523445.2	Ttbk1;Ttbk1	0;0	40	15	25	33	11	22	11	9	2	18	10	8	15	13	2
chr17	47510001	47511000	1000	*	1.27968e-07	0.000189864	-50.1571	Intron (NM_001081635.1/Ccnd3, intron 1 of 6)	17	47505051	47599689	94639	1	Ccnd3	NM_001081636.1	4950	NM_001081635.1;NM_001081636.1	Ccnd3;Ccnd3	0;0	6	2	4	25	7	18	46	36	10	15	12	3	38	32	6
chr17	48512001	48513000	1000	*	0.000162392	0.0363228	22.2559	Intron (XR_876580.2/Unc5cl, intron 8 of 9)	17	48454901	48468686	13786	1	Unc5cl	NM_152823.4	57100	XR_876580.2;XR_876583.2;XR_876582.2;XR_876584.2	Unc5cl;Unc5cl;Unc5cl;Unc5cl	0;0;0;0	24	24	0	49	49	0	5	3	2	18	14	4	22	21	1
chr17	49949001	49950000	1000	*	4.40844e-05	0.01555	24.5455	Distal Intergenic	17	49927094	49931821	4728	1	Gm19465	XM_011246786.1	21907	NA	NA	NA	27	27	0	19	19	0	22	19	3	15	13	2	15	8	7
chr17	49952001	49953000	1000	*	9.54074e-13	7.63259e-09	-50.8343	Distal Intergenic	17	49927094	49931821	4728	1	Gm19465	XM_011246786.1	24907	NA	NA	NA	5	2	3	59	30	29	31	30	1	36	36	0	25	23	2
chr17	51425001	51426000	1000	*	2.47132e-19	4.41306e-15	-77.3853	Exon (NR_046166.1/C330011F03Rik, exon 5 of 5)	17	51425209	51448269	23061	2	C330011F03Rik	NR_046166.1	22269	NR_046166.1	C330011F03Rik	0	11	2	9	50	4	46	15	15	0	17	17	0	21	15	6
chr17	52004001	52005000	1000	*	3.76901e-05	0.0139541	-22.8221	Distal Intergenic	17	51882727	51965257	82531	1	Gm20098	NR_045095.1	121274	NA	NA	NA	58	46	12	43	26	17	58	57	1	21	20	1	78	66	12
chr17	53688001	53689000	1000	*	5.11116e-05	0.0170828	-40.3573	Promoter (<=1kb)	17	53674786	53689297	14512	2	Sgol1	XM_011246642.2	297	XR_001782262.1;XM_017317772.1;XM_011246642.2;XM_017317658.1;NM_028232.2	Gm31532;Gm31532;Sgol1;Sgol1;Sgol1	-728;-3991;0;0;0	50	4	46	43	12	31	24	15	9	37	12	25	5	4	1
chr17	58919001	58920000	1000	*	8.55677e-05	0.0240458	32.8631	Intron (NM_027001.1/Pdzph1, intron 8 of 12)	17	58943933	58952582	8650	1	Gm33751	XR_385675.2	-23933	NM_027001.1	Pdzph1	0	32	22	10	7	4	3	25	11	14	20	3	17	80	25	55
chr17	59374001	59375000	1000	*	4.13845e-08	8.06716e-05	36.5798	Distal Intergenic	17	59068708	59068780	73	1	Trnav-cac	rna97396	305293	NA	NA	NA	46	37	9	35	32	3	45	16	29	16	9	7	64	36	28
chr17	59766001	59767000	1000	*	2.84692e-13	2.5194e-09	-25.3576	Distal Intergenic	17	59068708	59068780	73	1	Trnav-cac	rna97396	697293	NA	NA	NA	123	43	80	117	41	76	130	87	43	79	28	51	155	122	33
chr17	62377001	62378000	1000	*	0.000185365	0.0394191	-30	Distal Intergenic	17	62786113	62790633	4521	2	LOC108168326	XR_001782160.1	412633	NA	NA	NA	5	4	1	30	18	12	10	10	0	5	5	0	5	5	0
chr17	62383001	62384000	1000	*	6.60361e-06	0.00400845	34.9914	Distal Intergenic	17	62786113	62790633	4521	2	LOC108168326	XR_001782160.1	406633	NA	NA	NA	35	32	3	97	75	22	48	24	24	15	5	10	54	35	19
chr17	62418001	62419000	1000	*	2.37427e-05	0.0100605	38.1773	Distal Intergenic	17	62786113	62790633	4521	2	LOC108168326	XR_001782160.1	371633	NA	NA	NA	21	18	3	19	17	2	25	12	13	48	27	21	25	11	14
chr17	62760001	62761000	1000	*	9.49846e-07	0.000932135	24.8904	Intron (NM_010109.3/Efna5, intron 1 of 3)	17	62786113	62790633	4521	2	LOC108168326	XR_001782160.1	29633	NM_010109.3;NM_207654.2;XM_006523598.3	Efna5;Efna5;Efna5	0;0;0	5	4	1	39	37	2	25	6	19	5	5	0	44	28	16
chr17	64122001	64123000	1000	*	4.6256e-05	0.016	-30.0801	Exon (XR_001782173.1/LOC108168334, exon 3 of 3)	17	64122052	64133429	11378	2	LOC108168334	XR_001782173.1	10429	XM_006523641.3;XR_385280.3;XM_006523643.3;XM_011246293.2;XM_006523640.3;XM_006523645.3;XM_017317242.1;NM_001037997.3;NM_001286415.1;NM_008000.2;XM_017317243.1;XM_017317244.1;XM_006523647.3;XR_001782173.1;XR_001782174.1	Fer;Fer;Fer;Fer;Fer;Fer;Fer;Fer;Fer;Fer;Fer;Fer;Fer;LOC108168334;LOC108168334	0;0;0;0;0;0;0;0;0;0;0;0;0;0;10429	77	18	59	52	12	40	28	16	12	18	5	13	16	12	4
chr17	64396001	64397000	1000	*	9.61818e-08	0.000151706	-45.7694	Distal Intergenic	17	64440806	64440907	102	1	Mir6420	NR_105848.1	-43806	NA	NA	NA	11	5	6	12	3	9	16	9	7	15	14	1	91	85	6
chr17	64538001	64539000	1000	*	2.2401e-05	0.00967228	-34.651	Intron (NR_045899.1/AU016765, intron 1 of 3)	17	64529647	64530635	989	1	Gm35098	XR_876905.1	8354	NR_045899.1	AU016765	0	26	7	19	75	39	36	11	10	1	35	32	3	15	6	9
chr17	64543001	64544000	1000	*	6.57381e-05	0.0202395	-29.0719	Intron (NR_045899.1/AU016765, intron 1 of 3)	17	64514089	64555590	41502	2	AU016765	NR_045899.1	11590	NR_045899.1	AU016765	0	19	17	2	58	23	35	11	10	1	5	5	0	10	9	1
chr17	65612001	65613000	1000	*	9.19293e-13	7.47392e-09	-32.2479	Promoter (<=1kb)	17	65580053	65613555	33503	2	Vapa	NM_013933.3	555	NM_013933.3;XM_006524385.3;XM_017317500.1	Vapa;Vapa;Vapa	0;0;0	78	1	77	53	0	53	15	1	14	25	23	2	27	0	27
chr17	66075001	66076000	1000	*	2.28796e-05	0.00981734	24.9388	Promoter (<=1kb)	17	65965703	66076877	111175	2	Ankrd12	XM_006523394.3	877	XM_006523394.3;XM_006523395.3;XM_006523393.3;XM_006523396.3;XM_006523397.3;XM_006523399.3;NM_001025572.1;NM_001278415.1;NM_028388.3	Ankrd12;Ankrd12;Ankrd12;Ankrd12;Ankrd12;Ankrd12;Ankrd12;Ndufv2;Ndufv2	0;0;0;0;0;0;0;25559;25559	74	34	40	12	5	7	65	7	58	63	21	42	40	5	35
chr17	66076001	66077000	1000	*	4.84104e-05	0.0165336	22.6543	Promoter (<=1kb)	17	65965703	66076877	111175	2	Ankrd12	XM_006523394.3	0	XM_006523394.3;XM_006523395.3;XM_006523393.3;XM_006523396.3;XM_006523397.3;XM_006523399.3;NM_001025572.1;NM_001278415.1;NM_028388.3	Ankrd12;Ankrd12;Ankrd12;Ankrd12;Ankrd12;Ankrd12;Ankrd12;Ndufv2;Ndufv2	0;0;0;0;0;0;0;24559;24559	30	15	15	30	0	30	32	0	32	270	19	251	5	0	5
chr17	66234001	66235000	1000	*	0.000127505	0.0311327	27.645	Distal Intergenic	17	66189067	66201372	12306	1	Gm20742	XR_385711.2	44934	NA	NA	NA	52	31	21	45	20	25	51	7	44	60	11	49	146	60	86
chr17	66572001	66573000	1000	*	2.69663e-05	0.0110202	28.7929	Intron (NM_028998.1/Themis3, intron 2 of 3)	17	66555252	66594622	39371	2	Themis3	NM_028998.1	21622	NM_028998.1	Themis3	0	28	15	13	92	65	27	22	9	13	5	2	3	21	4	17
chr17	66944001	66945000	1000	*	7.8251e-06	0.00451681	-29.6565	Exon (XM_017317347.1/Ptprm, exon 6 of 30)	17	67026162	67026183	22	2	Mir5709	NA	81183	XM_017317347.1;XM_011246324.2;XM_006523864.2;XM_006523865.2;XM_006523866.3;XM_006523867.2;XM_006523868.2;XM_006523869.2;XM_006523870.2;XM_006523871.2;XM_006523872.2;XM_017317345.1;XM_017317346.1;NM_008984.2;XM_006523873.3;XM_017317348.1	Ptprm;Ptprm;Ptprm;Ptprm;Ptprm;Ptprm;Ptprm;Ptprm;Ptprm;Ptprm;Ptprm;Ptprm;Ptprm;Ptprm;Ptprm;Ptprm	0;0;0;0;0;0;0;0;0;0;0;0;0;0;0;0	14	11	3	118	58	60	9	9	0	6	6	0	36	29	7
chr17	66974001	66975000	1000	*	0.000137201	0.0326125	37.8078	Intron (XM_017317347.1/Ptprm, intron 3 of 29)	17	67026162	67026183	22	2	Mir5709	NA	51183	XM_017317347.1;XM_011246324.2;XM_006523864.2;XM_006523865.2;XM_006523866.3;XM_006523867.2;XM_006523868.2;XM_006523869.2;XM_006523870.2;XM_006523871.2;XM_006523872.2;XM_017317345.1;XM_017317346.1;NM_008984.2;XM_006523873.3;XM_017317348.1	Ptprm;Ptprm;Ptprm;Ptprm;Ptprm;Ptprm;Ptprm;Ptprm;Ptprm;Ptprm;Ptprm;Ptprm;Ptprm;Ptprm;Ptprm;Ptprm	0;0;0;0;0;0;0;0;0;0;0;0;0;0;0;0	37	28	9	28	17	11	18	7	11	12	3	9	11	3	8
chr17	67480001	67481000	1000	*	1.17689e-05	0.00609154	-27.7054	Distal Intergenic	17	67358822	67359906	1085	1	Gm36152	XR_385718.2	121179	NA	NA	NA	59	12	47	34	7	27	73	28	45	36	17	19	56	33	23
chr17	68070001	68071000	1000	*	0.000207081	0.0422098	24.1581	Distal Intergenic	17	67845658	68004198	158541	2	Arhgap28	XM_017317488.1	-65803	NA	NA	NA	119	116	3	61	60	1	83	73	10	15	14	1	5	2	3
chr17	68934001	68935000	1000	*	0.000242303	0.0463294	-30.0027	Distal Intergenic	17	68980559	68987121	6563	2	Gm36437	XR_385724.2	52121	NA	NA	NA	77	21	56	59	20	39	34	21	13	5	3	2	5	3	2
chr17	69466001	69467000	1000	*	7.08963e-06	0.004205	-38.3232	Intron (XM_006524415.3/Akain1, intron 1 of 1)	17	69473402	69475869	2468	2	LOC105246305	XR_876920.2	8869	XM_006524415.3;NM_001145192.1	Akain1;Akain1	0;0	10	1	9	29	7	22	68	45	23	6	3	3	12	6	6
chr17	70437001	70438000	1000	*	0.000113532	0.0289475	24.5962	Intron (XM_006524172.2/Dlgap1, intron 4 of 15)	17	70424792	70821413	396622	1	Dlgap1	NM_177639.6	12209	XM_006524172.2;XM_006524174.2;XM_006524168.2;XM_006524169.2;XM_011246406.2;XM_006524171.2;XM_006524176.2;XM_006524173.2;XM_011246407.2;XM_006524175.2;XM_011246408.2;NM_027712.3;NM_177639.6	Dlgap1;Dlgap1;Dlgap1;Dlgap1;Dlgap1;Dlgap1;Dlgap1;Dlgap1;Dlgap1;Dlgap1;Dlgap1;Dlgap1;Dlgap1	0;0;0;0;0;0;0;0;0;0;0;0;0	20	20	0	72	61	11	75	47	28	42	26	16	47	37	10
chr17	70657001	70658000	1000	*	7.91541e-06	0.00455432	22.5777	Exon (XM_006524172.2/Dlgap1, exon 8 of 16)	17	70584358	70590001	5644	2	LOC108168324	XR_001782151.1	-67000	XM_006524172.2;XM_006524174.2;XM_006524168.2;XM_006524169.2;XM_011246406.2;XM_006524171.2;XM_006524176.2;XM_006524173.2;XM_011246407.2;XM_006524175.2;XM_011246408.2;NM_027712.3;NM_177639.6;XM_017317447.1;XM_006524177.3;XM_006524178.3;XM_006524183.3;XM_006524181.1;XM_006524182.1;XM_006524185.1;XM_017317448.1;XM_017317449.1;XM_017317450.1;NM_001128180.1;XM_006524184.2;XM_006524179.3;NM_001128181.1;…	Dlgap1;Dlgap1;Dlgap1;Dlgap1;Dlgap1;Dlgap1;Dlgap1;Dlgap1;Dlgap1;Dlgap1;Dlgap1;Dlgap1;Dlgap1;Dlgap1;Dlgap1;Dlgap1;Dlgap1;Dlgap1;Dlgap1;Dlgap1;Dlgap1;Dlgap1;Dlgap1;Dlgap1;Dlgap1;Dlgap1;Dlgap1;Dlgap1	0;0;0;0;0;0;0;0;0;0;0;0;0;0;0;0;0;0;0;0;0;0;0;0;0;0;0;0	5	1	4	22	21	1	48	10	38	5	0	5	13	11	2
chr17	70825001	70826000	1000	*	6.2072e-05	0.0194889	35.6572	Distal Intergenic	17	70838514	70841284	2771	2	Gm41610	XR_876931.1	15284	XM_006524172.2;XM_006524174.2;XM_006524168.2;XM_006524169.2;XM_011246406.2;XM_006524171.2;XM_006524176.2;XM_006524173.2;XM_011246407.2;NM_177639.6;XM_017317447.1;XM_006524177.3;XM_006524178.3;XM_006524183.3;XM_006524181.1;XM_006524182.1;XM_006524185.1;XM_017317448.1;XM_017317449.1;XM_017317450.1;NM_001128180.1;XM_006524184.2;XM_006524179.3;XM_006524180.2	Dlgap1;Dlgap1;Dlgap1;Dlgap1;Dlgap1;Dlgap1;Dlgap1;Dlgap1;Dlgap1;Dlgap1;Dlgap1;Dlgap1;Dlgap1;Dlgap1;Dlgap1;Dlgap1;Dlgap1;Dlgap1;Dlgap1;Dlgap1;Dlgap1;Dlgap1;Dlgap1;Dlgap1	0;0;0;0;0;0;0;0;0;0;0;0;0;0;0;0;0;0;0;0;0;0;0;0	10	6	4	85	56	29	27	14	13	17	0	17	10	3	7
chr17	71868001	71869000	1000	*	0.000207921	0.0422733	-23.1228	3' UTR	17	71782900	71858351	75452	1	Clip4	XM_006525145.3	85101	NM_007439.2;NR_073185.1;NM_001271483.1;XM_006525147.3;XM_006525153.2;XR_385397.3	Alk;Clip4;Clip4;Clip4;Clip4;Clip4	0;98310;86702;85304;85300;85299	32	8	24	42	16	26	43	26	17	18	6	12	47	33	14
chr17	73622001	73623000	1000	*	0.000131702	0.0317803	36.7555	Intron (NM_027864.2/Galnt14, intron 1 of 14)	17	73667041	73671874	4834	1	LOC108168348	XR_001782216.1	-44041	NM_027864.2;XM_006524939.3;XM_006524940.3	Galnt14;Galnt14;Galnt14	0;0;0	21	20	1	8	8	0	18	14	4	11	7	4	17	7	10
chr17	74035001	74036000	1000	*	6.98577e-05	0.0211306	37.8661	Intron (NM_053188.2/Srd5a2, intron 1 of 4)	17	74017706	74047916	30211	2	Srd5a2	NM_053188.2	11916	NM_053188.2	Srd5a2	0	13	13	0	32	31	1	14	5	9	10	5	5	25	24	1
chr17	75465001	75466000	1000	*	9.34579e-05	0.0256119	-29.5238	Promoter (<=1kb)	17	75465332	75529054	63723	1	Rasgrp3	XM_006524272.3	0	XM_006524273.3;XM_006524271.3;NM_001166493.1;XM_006524272.3;NM_207246.4	Rasgrp3;Rasgrp3;Rasgrp3;Rasgrp3;Rasgrp3	0;0;0;0;0	26	0	26	44	0	44	7	2	5	10	0	10	5	3	2
chr17	77303001	77304000	1000	*	4.45674e-05	0.0156176	24.7694	Distal Intergenic	17	76936640	76937041	402	1	Gm6496	Gm6496	366361	NA	NA	NA	54	49	5	26	25	1	23	15	8	35	25	10	49	34	15
chr17	78936001	78937000	1000	*	2.52239e-07	0.000323799	-41.298	Promoter (<=1kb)	17	78919003	78937070	18068	2	Cebpz	NM_001024806.2	70	NM_001024806.2;XM_006523558.3;XM_006524995.1;XR_385374.3;NM_028611.3	Cebpz;Cebpz;Ndufaf7;Ndufaf7;Ndufaf7	0;-906;-106;-106;-135	96	7	89	62	4	58	63	13	50	6	5	1	37	15	22
chr17	79115001	79116000	1000	*	4.12081e-06	0.00285344	25.2074	Distal Intergenic	17	79051906	79090378	38473	1	Qpct	NM_027455.3	63095	NA	NA	NA	26	24	2	48	47	1	50	32	18	21	18	3	10	6	4
chr17	79188001	79189000	1000	*	7.01303e-10	2.68698e-06	-64.6429	Distal Intergenic	17	79257209	79258073	865	2	Gm5230	Gm5230	69073	NA	NA	NA	28	3	25	5	0	5	15	12	3	16	8	8	30	24	6
chr17	79771001	79772000	1000	*	1.19339e-09	4.23188e-06	-33.4067	Distal Intergenic	17	79737380	79745047	7668	1	Gm33055	XR_385784.2	33621	NA	NA	NA	12	6	6	82	23	59	37	31	6	44	26	18	43	32	11
chr17	80037001	80038000	1000	*	0.000221528	0.0439018	34.0027	Intron (NM_144802.4/Hnrnpll, intron 8 of 12)	17	80054025	80054756	732	1	Gpx4-ps	Gpx4-ps	-16025	NM_144802.4;XR_001782118.1	Hnrnpll;Hnrnpll	0;0	10	10	0	31	30	1	5	2	3	37	32	5	45	30	15
chr17	80800001	80801000	1000	*	6.55275e-09	1.81517e-05	51.3889	Distal Intergenic	17	80807231	80809434	2204	2	Gm33596	XR_385790.2	8434	NA	NA	NA	20	17	3	10	4	6	27	0	27	16	0	16	21	7	14
chr17	81068001	81069000	1000	*	3.18023e-07	0.000392137	-46.3095	Promoter (2-3kb)	17	81032748	81065135	32388	2	Thumpd2	XM_011246639.2	-2866	XM_011246637.2;XM_011246636.2;XR_001782115.1;NM_028138.1;XR_001782116.1;XR_876548.2;XM_017317656.1;XM_011246639.2	Thumpd2;Thumpd2;Thumpd2;Thumpd2;Thumpd2;Thumpd2;Thumpd2;Thumpd2	-2915;-2879;-2866;-2916;-2867;-2866;-2866;-2866	47	10	37	72	42	30	38	28	10	16	15	1	11	10	1
chr17	81190001	81191000	1000	*	1.33023e-05	0.00661478	21.0796	Distal Intergenic	17	81284954	81317615	32662	1	Gm33944	XR_385800.2	-93954	NA	NA	NA	24	9	15	81	52	29	25	12	13	35	2	33	59	21	38
chr17	83035001	83036000	1000	*	9.19518e-05	0.0253171	24.3362	Intron (NR_045094.1/Gm19689, intron 3 of 3)	17	83033592	83078225	44634	2	Gm19689	NR_045094.1	42225	NR_045094.1	Gm19689	0	5	5	0	31	31	0	28	23	5	15	10	5	55	43	12
chr17	83633001	83634000	1000	*	1.19776e-08	2.92878e-05	-54.737	Promoter (1-2kb)	17	83579949	83631993	52045	2	Kcng3	XM_006524200.3	-1008	XM_006524200.3;NM_153512.1	Kcng3;Kcng3	-1008;-1106	16	5	11	65	11	54	15	9	6	6	6	0	17	13	4
chr17	84676001	84677000	1000	*	6.79636e-25	2.0595e-20	-36.6487	Promoter (<=1kb)	17	84676302	84700333	24032	1	Abcg8	NM_001286005.1	0	NM_031884.2;NM_001286005.1	Abcg5;Abcg8	0;0	160	43	117	45	39	6	33	32	1	48	41	7	47	46	1
chr17	85091001	85092000	1000	*	1.23882e-07	0.000184898	-34.9495	Promoter (<=1kb)	17	85090700	85458580	367881	1	Camkmt	NM_028576.2	301	XM_006524993.3;XR_385373.2;XM_006524992.2;XM_006524994.3;NM_028576.2;XM_006524001.3;NM_001163622.1;NM_001163623.1;NM_145984.3;NM_001163624.1	Camkmt;Camkmt;Camkmt;Camkmt;Camkmt;Prepl;Prepl;Prepl;Prepl;Prepl	0;0;0;0;0;-742;-734;-734;-734;-727	5	0	5	55	11	44	33	28	5	10	5	5	6	0	6
chr17	85455001	85456000	1000	*	1.35656e-17	2.22387e-13	-60.5772	Intron (XM_006524992.2/Camkmt, intron 9 of 9)	17	85613608	85625228	11621	1	Six3	XM_017317367.1	-157608	XR_385373.2;XM_006524992.2;NM_028576.2	Camkmt;Camkmt;Camkmt	0;0;0	93	14	79	26	7	19	44	27	17	30	28	2	10	9	1
chr17	86505001	86506000	1000	*	8.76725e-08	0.000141939	-26.2959	Intron (XM_017317328.1/Prkce, intron 10 of 15)	17	86461918	86657919	196002	1	Prkce	XM_006523833.2	43083	XM_017317328.1;NM_011104.3;XM_006523833.2	Prkce;Prkce;Prkce	0;0;0	5	5	0	58	22	36	17	16	1	12	11	1	5	5	0
chr17	87026001	87027000	1000	*	3.70433e-09	1.11241e-05	-32.8218	Promoter (<=1kb)	17	87025561	87035808	10248	1	Cript	NM_019936.3	440	NM_019936.3;XM_006523831.2;NM_008838.1	Cript;Pigf;Pigf	0;-530;-600	27	16	11	130	41	89	64	47	17	12	12	0	49	30	19
chr17	87947001	87948000	1000	*	9.11834e-06	0.0050912	-58.7413	Distal Intergenic	17	87921060	87921425	366	1	Rpl36-ps4	Rpl36-ps4	25941	NA	NA	NA	22	8	14	5	0	5	32	28	4	26	21	5	32	20	12
chr17	88032001	88033000	1000	*	4.61922e-05	0.015999	24.6352	Intron (XM_006524204.3/Fbxo11, intron 1 of 22)	17	87990859	88064927	74069	2	Fbxo11	XM_006524204.3	31927	XM_006524204.3;NM_001081034.1;XM_006524203.3	Fbxo11;Fbxo11;Fbxo11	0;0;0	12	12	0	17	17	0	27	23	4	6	6	0	22	9	13
chr17	88268001	88269000	1000	*	0.000154392	0.0351523	41.2686	Intron (XR_385902.2/Gm31615, intron 4 of 7)	17	88273534	88354434	80901	1	Gm41651	XR_877103.2	-4534	XR_385902.2;XR_877106.1;XR_877109.1;XR_877104.1;XR_877107.1;XR_877108.1;XR_877111.1;XR_877112.1;XR_877113.1;XR_877103.2	Gm31615;Gm31615;Gm31615;Gm31615;Gm31615;Gm31615;Gm31615;Gm31615;Gm31615;Gm41651	0;0;0;0;0;0;0;0;0;-4534	31	24	7	11	7	4	18	5	13	5	0	5	5	3	2
chr17	88486001	88487000	1000	*	2.76711e-08	5.87497e-05	22.7447	3' UTR	17	88458112	88490533	32422	1	Foxn2	XM_006523652.2	27889	NM_180974.4;XM_006523655.3;XM_006523651.3;XM_006523653.3;XM_006523654.3;XM_006523652.2	Foxn2;Foxn2;Foxn2;Foxn2;Foxn2;Foxn2	0;0;0;0;0;0	47	17	30	217	120	97	76	14	62	21	2	19	39	16	23
chr17	88513001	88514000	1000	*	6.60846e-08	0.000115331	-33.2323	Distal Intergenic	17	88530124	88588367	58244	1	Ppp1r21	NM_028658.4	-16124	NA	NA	NA	43	0	43	15	7	8	11	4	7	6	2	4	16	16	0
chr17	88669001	88670000	1000	*	0.00016477	0.03664	-24.2059	Promoter (<=1kb)	17	88668660	88715150	46491	1	Gtf2a1l	NM_023630.2	341	XM_011246628.2;NM_023630.2	Gtf2a1l;Gtf2a1l	0;0	46	16	30	16	9	7	7	6	1	15	7	8	56	43	13
chr17	89819001	89820000	1000	*	0.000186318	0.0395561	24.1405	Distal Intergenic	17	89908475	89910447	1973	2	Gm10184	Gm10184	90447	NA	NA	NA	59	38	21	41	32	9	40	16	24	48	29	19	71	29	42
chr17	92429001	92430000	1000	*	6.7957e-05	0.0207249	-43.4153	Distal Intergenic	17	92371815	92373187	1373	2	Gm6751	Gm6751	-55814	NA	NA	NA	5	2	3	21	13	8	17	16	1	15	14	1	23	22	1
chr17	93791001	93792000	1000	*	8.83979e-06	0.00497002	27.6927	Distal Intergenic	17	94164557	94176816	12260	2	Gm32512	XR_877118.2	384816	NA	NA	NA	113	97	16	38	35	3	74	49	25	9	5	4	29	18	11
chr17	94855001	94856000	1000	*	7.97147e-07	0.000815913	20.2836	Downstream (1-2kb)	17	94857919	94862385	4467	2	LOC102635273	LOC102635273	6385	LOC102635273	LOC102635273	6385	51	24	27	80	69	11	101	26	75	78	55	23	63	27	36
chr18	4322001	4323000	1000	*	1.13509e-05	0.00592427	24.564	Distal Intergenic	18	4331325	4348960	17636	2	Map3k8	XM_006525944.1	25960	NA	NA	NA	25	24	1	30	30	0	21	13	8	17	16	1	28	18	10
chr18	6989001	6990000	1000	*	0.000108986	0.0281566	-21.1495	Intron (NM_177595.4/Mkx, intron 5 of 6)	18	6934966	7004779	69814	2	Mkx	NM_177595.4	14779	NM_177595.4	Mkx	0	38	5	33	40	1	39	31	13	18	5	1	4	16	4	12
chr18	7608001	7609000	1000	*	1.6837e-13	1.54468e-09	24.1508	Promoter (<=1kb)	18	7348111	7608009	259899	2	Mpp7	XM_011247026.2	0	NM_001081287.2;XM_011247026.2;XM_017318007.1;XM_006526326.3;XM_006526325.3;XM_017318006.1;XM_011247025.2;XM_006526327.2;NM_001161620.1;XM_006526330.3;XM_017318009.1;XM_017318010.1	Mpp7;Mpp7;Mpp7;Mpp7;Mpp7;Mpp7;Mpp7;Mpp7;Mpp7;Mpp7;Mpp7;Mpp7	0;0;0;0;0;0;0;0;0;0;0;0	186	158	28	150	98	52	162	71	91	140	69	71	137	82	55
chr18	9957001	9958000	1000	*	1.83551e-06	0.00154245	37.8599	Promoter (<=1kb)	18	9958180	9995484	37305	1	Thoc1	NM_153552.3	-180	NM_153552.3	Thoc1	-180	6	4	2	21	13	8	87	6	81	21	11	10	5	1	4
chr18	10275001	10276000	1000	*	1.82523e-05	0.0083803	-21.2884	Distal Intergenic	18	10262202	10263803	1602	1	Gm5686	Gm5686	12799	NA	NA	NA	76	43	33	91	76	15	61	58	3	32	31	1	78	64	14
chr18	10523001	10524000	1000	*	0.000121008	0.0300269	-21.6047	Exon (XM_006526069.2/Greb1l, exon 18 of 29)	18	10482847	10483540	694	2	Nutf2-ps2	XM_001473957.5	-39461	XM_006526069.2;XM_006526068.3;NM_001083628.1;XM_011246970.2	Greb1l;Greb1l;Greb1l;Greb1l	0;0;0;0	37	25	12	21	18	3	19	18	1	12	12	0	20	20	0
chr18	12332001	12333000	1000	*	0.000129423	0.0314361	-28.303	Promoter (<=1kb)	18	12333718	12506992	173275	1	Lama3	XM_006525691.3	-718	XM_006525691.3;XR_385977.3;XM_006525686.3;XM_006525685.3;NM_010680.1	Lama3;Lama3;Lama3;Lama3;Lama3	-718;-725;-736;-750;-1024	53	34	19	52	28	24	48	34	14	5	5	0	56	51	5
chr18	12642001	12643000	1000	*	2.22308e-05	0.00961956	45.7843	Promoter (<=1kb)	18	12643533	12737052	93520	1	Ttc39c	NM_028341.4	-533	XR_001782425.1;XR_001782426.1;XR_877187.2;XR_877188.2;NM_028341.4	Gm41668;Gm41668;Gm41668;Gm41668;Ttc39c	10484;10484;10484;10484;-533	12	10	2	12	12	0	17	3	14	5	1	4	7	7	0
chr18	18961001	18962000	1000	*	0.00016713	0.0369751	-23.9485	Distal Intergenic	18	19167761	19188056	20296	1	Gm31086	XR_386095.3	-205761	NA	NA	NA	61	28	33	30	11	19	80	50	30	51	31	20	87	63	24
chr18	19296001	19297000	1000	*	0.000212602	0.0428048	28.6207	Distal Intergenic	18	19365960	19379907	13948	2	Gm38432	Gm38432	82907	NA	NA	NA	62	53	9	17	17	0	34	19	15	20	11	9	27	22	5
chr18	19452001	19453000	1000	*	3.96497e-05	0.0144601	25.8796	Distal Intergenic	18	19365960	19379907	13948	2	Gm38432	Gm38432	-72094	NA	NA	NA	82	66	16	12	9	3	34	14	20	19	11	8	23	13	10
chr18	20539001	20540000	1000	*	4.48434e-13	3.86581e-09	-21.5797	Exon (NM_030596.4/Dsg3, exon 16 of 16)	18	20548028	20549358	1331	2	Tpi-rs10	Tpi-rs10	9358	NM_030596.4	Dsg3	0	161	98	63	163	89	74	105	73	32	86	68	18	216	193	23
chr18	21423001	21424000	1000	*	1.48514e-06	0.00130747	-34.2103	Distal Intergenic	18	21480493	21628280	147788	1	Gm31646	XR_877207.1	-56493	NA	NA	NA	29	8	21	29	10	19	25	20	5	11	3	8	26	23	3
chr18	23955001	23956000	1000	*	4.91351e-05	0.0166477	-43.6508	Promoter (<=1kb)	18	23954688	23964671	9984	1	Zfp397	NM_027007.2	313	XM_011246996.2;XM_011246997.2;NM_027007.2;XM_011247056.2;XR_877220.2	Zfp397;Zfp397;Zfp397;Zscan30;Zscan30	0;0;0;0;0	5	0	5	25	0	25	31	0	31	14	9	5	12	8	4
chr18	23990001	23991000	1000	*	1.01511e-07	0.000158859	-51.631	Promoter (<=1kb)	18	23989634	24005371	15738	1	Zfp35	NM_011755.2	367	NM_011755.2;XM_011247056.2;XR_877220.2;XM_006526394.3;XM_006526391.3;XM_006526392.3;XM_006526393.3;XM_017318022.1	Zfp35;Zscan30;Zscan30;Zscan30;Zscan30;Zscan30;Zscan30;Zscan30	0;0;0;-2674;-2673;-2673;-2673;-2647	34	23	11	55	16	39	10	10	0	5	5	0	5	5	0
chr18	26435001	26436000	1000	*	0.000101354	0.0268202	-28.698	Distal Intergenic	18	26268359	26329872	61514	1	Gm41679	XR_877254.1	166642	NA	NA	NA	34	22	12	19	13	6	48	44	4	7	7	0	17	16	1
chr18	30273001	30274000	1000	*	1.54923e-06	0.00135304	-26.4069	Promoter (<=1kb)	18	30272896	30348120	75225	1	Pik3c3	NM_181414.5	105	XR_385985.2;NM_181414.5	Pik3c3;Pik3c3	0;0	25	0	25	63	21	42	28	26	2	6	0	6	11	4	7
chr18	33341001	33342000	1000	*	7.12195e-06	0.00421417	23.2012	Distal Intergenic	18	33240480	33262587	22108	2	Gm41683	XR_877286.1	-78414	NA	NA	NA	15	15	0	28	27	1	26	15	11	5	5	0	49	33	16
chr18	34332001	34333000	1000	*	3.14728e-05	0.0123085	47.2847	Promoter (<=1kb)	18	34331145	34336599	5455	1	Srp19	NM_025527.3	856	XM_006526155.1;NM_025527.3	Srp19;Srp19	0;0	10	9	1	38	33	5	22	9	13	5	1	4	32	20	12
chr18	34652001	34653000	1000	*	4.80309e-08	9.01143e-05	-26.4743	Promoter (<=1kb)	18	34628348	34651749	23402	2	Cdc23	XM_006526084.3	-252	XM_006526084.3;NM_178347.4	Cdc23;Cdc23	-252;-265	78	3	75	93	35	58	15	7	8	21	7	14	73	45	28
chr18	36019001	36020000	1000	*	0.00012698	0.031064	-42.1569	Intron (XM_006525461.3/Nrg2, intron 10 of 10)	18	36017914	36036052	18139	2	Nrg2	XM_006525465.3	16052	XM_006525461.3;NM_001167891.1;XM_006525465.3;XM_011246790.2;XM_011246791.2;XM_006525463.2;XM_006525464.2;XM_011246789.2;XM_006525462.3;XM_006525466.3;XM_011246792.2;XR_001782394.1;XM_017317995.1;NM_001289602.1;NM_028707.4;NR_110349.1	Nrg2;Nrg2;Nrg2;Nrg2;Nrg2;Nrg2;Nrg2;Nrg2;Nrg2;Nrg2;Nrg2;Psd2;Psd2;Psd2;Psd2;Psd2	0;0;0;0;0;0;0;0;0;179047;179048;54495;54492;54171;54171;54171	12	4	8	17	14	3	12	12	0	5	5	0	5	5	0
chr18	36691001	36692000	1000	*	0.000261827	0.0485134	-34.8991	Exon (NM_172831.2/E230025N22Rik, exon 6 of 13)	18	36684923	36695925	11003	2	E230025N22Rik	NM_172831.2	3925	NM_172831.2;XM_011246923.2;XM_017317898.1;XM_017317899.1;XM_017317900.1	E230025N22Rik;E230025N22Rik;E230025N22Rik;E230025N22Rik;E230025N22Rik	0;0;0;0;0	23	9	14	27	1	26	27	15	12	16	13	3	28	9	19
chr18	36731001	36732000	1000	*	1.87641e-10	8.6871e-07	48.6668	Distal Intergenic	18	36735016	36742400	7385	1	Tmco6	XM_006526276.3	-3016	NM_009841.4;XM_006526276.3;XM_006526277.2;NM_028036.3	Cd14;Tmco6;Tmco6;Tmco6	-4186;-3016;-3016;-3070	48	35	13	49	36	13	15	0	15	23	1	22	13	9	4
chr18	36734001	36735000	1000	*	1.33319e-06	0.00120651	-44.955	Promoter (<=1kb)	18	36735016	36742400	7385	1	Tmco6	XM_006526276.3	-16	XM_006526276.3;XM_006526277.2;NM_028036.3	Tmco6;Tmco6;Tmco6	-16;-16;-70	74	2	72	35	0	35	5	2	3	5	4	1	37	7	30
chr18	36745001	36746000	1000	*	2.89157e-09	9.17958e-06	-58.9162	Promoter (<=1kb)	18	36744656	36757639	12984	1	Ik	NM_011879.2	345	NM_011879.2;NM_010885.5;XM_006526276.3;XM_006526277.2;NM_028036.3	Ik;Ndufa2;Tmco6;Tmco6;Tmco6	0;-414;9985;9985;9931	61	2	59	20	0	20	20	3	17	6	4	2	10	10	0
chr18	36929001	36930000	1000	*	3.10005e-05	0.0121809	-26.3937	Promoter (<=1kb)	18	36930285	37187657	257373	1	Pcdha1	NM_054072.1	-285	NM_054072.1	Pcdha1	-285	65	35	30	62	43	19	33	26	7	35	33	2	11	10	1
chr18	37686001	37687000	1000	*	1.94802e-07	0.000265037	-36.5233	Promoter (<=1kb)	18	37685400	37841870	156471	1	Pcdhga4	NM_033587.3	601	NM_001174154.2;NM_001301256.1;NM_001301259.1;NM_033584.1;NM_033585.1;NM_033586.2;NM_033587.3;NM_033574.3;NM_033575.3	Gm37013;Gm38666;Gm38667;Pcdhga1;Pcdhga2;Pcdhga3;Pcdhga4;Pcdhgb1;Pcdhgb2	0;0;0;0;0;0;0;0;0	93	23	70	10	6	4	10	10	0	18	9	9	15	13	2
chr18	37721001	37722000	1000	*	0.00016934	0.0372503	-20.4093	Promoter (<=1kb)	18	37720554	37841870	121317	1	Pcdhgb4	NM_033576.1	447	NM_001174154.2;NM_001301256.1;NM_001301259.1;NM_033584.1;NM_033585.1;NM_033586.2;NM_033587.3;NM_033588.4;NM_033589.1;NM_033590.3;NM_033591.3;NM_033574.3;NM_033575.3;NM_033576.1	Gm37013;Gm38666;Gm38667;Pcdhga1;Pcdhga2;Pcdhga3;Pcdhga4;Pcdhga5;Pcdhga6;Pcdhga7;Pcdhga8;Pcdhgb1;Pcdhgb2;Pcdhgb4	0;0;0;0;0;0;0;0;0;0;0;0;0;0	59	4	55	37	4	33	33	12	21	10	2	8	16	5	11
chr18	37765001	37766000	1000	*	6.12282e-07	0.000657661	-31.9444	Promoter (<=1kb)	18	37765580	37841873	76294	1	Pcdhga12	NM_033595.4	0	NM_001174154.2;NM_001301256.1;NM_001301259.1;NM_033584.1;NM_033593.3;NM_033594.2;NM_033595.4;NM_033585.1;NM_033586.2;NM_033587.3;NM_033588.4;NM_033589.1;NM_033590.3;NM_033591.3;NM_033592.3;NM_033574.3;NM_033575.3;NM_033576.1;NM_033577.1;NM_033578.3;NM_033579.1;NM_033580.2	Gm37013;Gm38666;Gm38667;Pcdhga1;Pcdhga10;Pcdhga11;Pcdhga12;Pcdhga2;Pcdhga3;Pcdhga4;Pcdhga5;Pcdhga6;Pcdhga7;Pcdhga8;Pcdhga9;Pcdhgb1;Pcdhgb2;Pcdhgb4;Pcdhgb5;Pcdhgb6;Pcdhgb7;Pcdhgb8	0;0;0;0;0;0;0;0;0;0;0;0;0;0;0;0;0;0;0;0;0;0	36	13	23	10	10	0	5	5	0	11	11	0	8	8	0
chr18	40331001	40332000	1000	*	2.31428e-06	0.00184258	34.0581	Intron (XM_017317937.1/Kctd16, intron 2 of 2)	18	40258361	40531184	272824	1	Kctd16	NM_026135.1	72640	XM_017317937.1;XM_017317939.1;XM_017317936.1;XM_017317938.1;NM_026135.1	Kctd16;Kctd16;Kctd16;Kctd16;Kctd16	0;0;0;0;0	5	2	3	33	24	9	48	11	37	25	6	19	5	1	4
chr18	40967001	40968000	1000	*	0.000135466	0.0323694	-34.2798	Distal Intergenic	18	40780069	40811782	31714	1	Gm41710	XR_877352.1	186932	NA	NA	NA	39	23	16	58	35	23	8	8	0	7	7	0	66	54	12
chr18	42261001	42262000	1000	*	9.69367e-07	0.000945724	36.6465	Promoter (<=1kb)	18	42202349	42262071	59723	2	Lars	NM_134137.2	71	XR_001782319.1;NM_134137.2	Lars;Lars	0;0	25	22	3	11	2	9	30	1	29	75	22	53	6	1	5
chr18	42274001	42275000	1000	*	1.81646e-08	4.19506e-05	-30.3823	Promoter (<=1kb)	18	42274380	42275197	818	2	Gm4013	NR_033452.1	197	NR_033452.1;NM_172626.2;XM_006525863.2;XM_006525864.2;XM_017317887.1	Gm4013;Rbm27;Rbm27;Rbm27;Rbm27	0;-353;-358;-358;-358	58	6	52	74	7	67	51	20	31	13	6	7	93	33	60
chr18	44337001	44338000	1000	*	0.000164893	0.0366591	34.226	Promoter (2-3kb)	18	44334074	44355722	21649	1	Myot	NM_001033621.3	2927	XM_006526131.3;XM_006526132.3;XM_006526133.3;NM_001033621.3	Myot;Myot;Myot;Myot	0;0;0;0	20	11	9	83	47	36	27	9	18	5	0	5	70	22	48
chr18	45729001	45730000	1000	*	1.16607e-07	0.000177484	-30.9088	Exon (XR_877373.1/Gm41718, exon 2 of 3)	18	45718472	45735438	16967	1	Gm41718	XR_877373.1	10529	NR_040342.1;XR_877373.1	A330093E20Rik;Gm41718	0;0	33	21	12	36	23	13	33	32	1	38	36	2	39	36	3
chr18	46354001	46355000	1000	*	3.13013e-07	0.000387873	-35.7896	Intron (XR_001782500.1/Gm32288, intron 2 of 3)	18	46358887	46380566	21680	1	Gm32339	XR_001782501.1	-3887	XR_001782500.1;XR_001782501.1	Gm32288;Gm32339	0;-3887	22	9	13	36	25	11	28	27	1	17	13	4	36	36	0
chr18	46356001	46357000	1000	*	5.78167e-09	1.63614e-05	-29.6807	Promoter (1-2kb)	18	46358887	46380566	21680	1	Gm32339	XR_001782501.1	-1887	XR_001782500.1;XR_001782501.1	Gm32288;Gm32339	0;-1887	124	22	102	37	6	31	132	48	84	71	28	43	67	43	24
chr18	46743001	46744000	1000	*	2.65433e-07	0.000337707	24.4336	Promoter (1-2kb)	18	46741890	46790619	48730	1	Ap3s1	XM_006525528.3	1111	NM_001303015.1;NM_009681.5;XM_006525526.2;XM_006525528.3;NM_026217.3;XM_006526187.1	Ap3s1;Ap3s1;Ap3s1;Ap3s1;Atg12;Atg12	0;0;0;0;-1422;-1162	56	51	5	33	26	7	48	35	13	35	3	32	11	11	0
chr18	47477001	47478000	1000	*	0.00022183	0.0439267	36.5675	Distal Intergenic	18	47452668	47470868	18201	1	9130209A04Rik	NR_033453.1	24333	NA	NA	NA	11	11	0	40	37	3	14	5	9	15	14	1	6	3	3
chr18	48136001	48137000	1000	*	4.41824e-05	0.0155702	20.3442	Distal Intergenic	18	48068322	48070052	1731	2	Gm5237	Gm5237	-65949	NA	NA	NA	19	19	0	29	29	0	16	15	1	15	12	3	23	15	8
chr18	48812001	48813000	1000	*	0.000182093	0.038967	-32.5	Distal Intergenic	18	48626686	48627909	1224	1	Gm5839	Gm5839	185315	NA	NA	NA	15	5	10	6	4	2	25	20	5	5	4	1	48	42	6
chr18	49654001	49655000	1000	*	1.48409e-06	0.00130747	-24.1784	Distal Intergenic	18	49547819	49559491	11673	2	Gm32958	XR_386217.2	-94510	NA	NA	NA	69	54	15	73	42	31	66	56	10	27	27	0	58	53	5
chr18	51116001	51117000	1000	*	6.65017e-07	0.000705214	-45.8135	Promoter (<=1kb)	18	51117898	51304641	186744	1	Prr16	NM_001081224.2	-898	NM_001081224.2	Prr16	-898	30	5	25	56	33	23	5	4	1	24	23	1	32	24	8
chr18	51447001	51448000	1000	*	1.12441e-05	0.00590477	36.4103	Distal Intergenic	18	51555780	51566408	10629	1	Gm41722	XR_877400.1	-107780	NA	NA	NA	42	26	16	36	28	8	30	8	22	13	4	9	7	3	4
chr18	51627001	51628000	1000	*	0.000166173	0.0368536	-23.9854	Distal Intergenic	18	51555780	51566408	10629	1	Gm41722	XR_877400.1	71221	NA	NA	NA	12	7	5	85	53	32	33	28	5	17	13	4	36	33	3
chr18	53175001	53176000	1000	*	0.000138627	0.0328353	23.8095	Promoter (<=1kb)	18	53176289	53220835	44547	1	Snx2	XM_006526190.3	-289	XM_006526190.3;NM_026386.1	Snx2;Snx2	-289;-365	20	20	0	10	10	0	21	6	15	17	17	0	18	18	0
chr18	53752001	53753000	1000	*	6.42042e-05	0.0199268	-26.8291	Distal Intergenic	18	53681723	53745603	63881	2	Cep120	XM_011246906.1	-6398	NA	NA	NA	60	25	35	39	12	27	41	26	15	36	22	14	65	42	23
chr18	53995001	53996000	1000	*	7.10021e-06	0.00420878	-21.6013	Distal Intergenic	18	53984303	53985527	1225	1	Gm5507	Gm5507	10698	NA	NA	NA	26	15	11	42	9	33	49	36	13	17	4	13	37	32	5
chr18	54127001	54128000	1000	*	0.000234147	0.0453658	28.4887	Distal Intergenic	18	54209814	54220440	10627	2	Gm41729	XR_877410.2	92440	NA	NA	NA	34	31	3	70	66	4	10	4	6	11	8	3	30	24	6
chr18	55133001	55134000	1000	*	3.97454e-12	2.72228e-08	-44.4257	Promoter (1-2kb)	18	55126838	55131737	4900	2	Gm34011	XR_386243.1	-1264	XR_386243.1;XR_001782449.1;XR_877424.1;XR_877419.2	Gm34011;Gm4221;Gm4221;Gm4221	-1264;0;0;0	78	15	63	25	7	18	40	11	29	22	20	2	56	48	8
chr18	55611001	55612000	1000	*	1.10248e-06	0.001046	23.3624	Intron (XR_877438.1/Gm34295, intron 1 of 2)	18	55592086	55646080	53995	2	Gm34295	XR_877438.1	34080	XR_877438.1	Gm34295	0	15	15	0	59	58	1	38	31	7	37	18	19	35	34	1
chr18	56368001	56369000	1000	*	2.95163e-05	0.0117829	-35.5314	Distal Intergenic	18	56387485	56503792	116308	1	Gramd3	XM_011246800.1	-18485	NA	NA	NA	28	14	14	46	22	24	10	10	0	15	14	1	5	3	2
chr18	56621001	56622000	1000	*	5.26172e-07	0.000582049	-33.0767	Distal Intergenic	18	56588348	56594779	6432	1	Tex43	NM_026099.3	32653	NA	NA	NA	93	4	89	39	16	23	15	7	8	11	8	3	23	11	12
chr18	56774001	56775000	1000	*	1.41256e-06	0.0012567	-22.6523	Intron (NM_177115.2/March3, intron 4 of 4)	18	56795611	56807656	12046	1	Gm15345	XR_877454.2	-20611	NM_177115.2;XM_006526019.3;XM_006526020.3	March3;March3;March3	0;150551;150551	67	33	34	29	17	12	11	6	5	64	55	9	28	25	3
chr18	57404001	57405000	1000	*	1.82229e-05	0.00837066	-38.5276	Promoter (<=1kb)	18	57405270	57415246	9977	1	Gm19500	XR_877456.2	-270	XR_877456.2;XR_386257.2;XR_877457.1	Gm19500;Gm19500;Gm19500	-270;-740;-746	21	13	8	14	5	9	54	48	6	23	21	2	22	18	4
chr18	58116001	58117000	1000	*	6.96368e-05	0.021089	26.6243	Intron (NM_010181.2/Fbn2, intron 8 of 64)	18	58008623	58209926	201304	2	Fbn2	NM_010181.2	92926	NM_010181.2;XM_017317828.1	Fbn2;Fbn2	0;0	14	14	0	71	65	6	6	6	0	15	2	13	17	16	1
chr18	58697001	58698000	1000	*	0.000216849	0.0432747	21.2043	Distal Intergenic	18	58659482	58679570	20089	1	Isoc1	NM_025478.3	37519	NA	NA	NA	8	8	0	18	16	2	28	25	3	46	14	32	5	5	0
chr18	60561001	60562000	1000	*	1.64101e-06	0.00141223	-32.5758	Promoter (<=1kb)	18	60560786	60572729	11944	1	Rbm22	NM_025776.2	215	XM_006526189.3;NM_026302.3;NM_025776.2	Dctn4;Dctn4;Rbm22	34842;34780;0	40	0	40	10	0	10	11	8	3	11	0	11	20	5	15
chr18	60894001	60895000	1000	*	1.58342e-05	0.00755808	20.522	Distal Intergenic	18	60883072	60888997	5926	2	Gm41745	XR_877468.1	-5004	NA	NA	NA	16	15	1	34	34	0	19	16	3	15	14	1	33	17	16
chr18	61426001	61427000	1000	*	9.70696e-07	0.000946097	-28.1222	Distal Intergenic	18	61433497	61434201	705	2	Gm8755	Gm8755	7201	NA	NA	NA	56	36	20	60	23	37	44	32	12	39	33	6	63	51	12
chr18	61727001	61728000	1000	*	0.000211432	0.0426446	29.703	Promoter (<=1kb)	18	61726390	61728254	1865	1	1500015A07Rik	NR_029432.1	611	NR_029432.1;NM_178928.4;NM_021296.2;XR_385980.3	1500015A07Rik;Afap1l1;Grpel2;Grpel2	0;58662;-670;-641	34	28	6	27	18	9	12	7	5	10	5	5	23	6	17
chr18	62506001	62507000	1000	*	3.654e-05	0.0136649	24.9369	Exon (NM_134136.3/Fbxo38, exon 19 of 22)	18	62504061	62530789	26729	2	Fbxo38	XM_017317781.1	23789	NM_134136.3;XM_017317781.1;XM_006525499.3;XM_017317780.1;XM_006525497.3;XM_006525501.3;XM_006525502.3;XM_006525498.1	Fbxo38;Fbxo38;Fbxo38;Fbxo38;Fbxo38;Fbxo38;Fbxo38;Fbxo38	0;0;0;0;0;0;0;0	66	63	3	24	23	1	6	6	0	15	10	5	11	5	6
chr18	62975001	62976000	1000	*	6.29082e-05	0.0196773	36.8851	Promoter (1-2kb)	18	62977838	62999450	21613	1	Napg	XM_011246806.2	-1838	XM_011246806.2;XM_011246809.2;NM_028017.1	Napg;Napg;Napg	-1838;-1838;-1916	36	13	23	31	19	12	26	5	21	5	0	5	37	6	31
chr18	64821001	64822000	1000	*	0.000268158	0.0492085	-21.3944	Distal Intergenic	18	64799964	64802926	2963	2	Gm29860	XR_386289.2	-18075	NA	NA	NA	10	7	3	46	34	12	51	49	2	39	36	3	24	22	2
chr18	65789001	65790000	1000	*	2.80511e-05	0.0113384	-31.309	Distal Intergenic	18	65800578	65817657	17080	1	Sec11c	NM_025468.2	-10578	NA	NA	NA	56	26	30	39	16	23	28	24	4	15	10	5	22	16	6
chr18	65824001	65825000	1000	*	2.03631e-05	0.00904627	42.2944	Distal Intergenic	18	65801307	65817660	16354	1	Sec11c	XM_006526150.1	22694	NA	NA	NA	10	8	2	35	33	2	22	12	10	6	0	6	5	4	1
chr18	66391001	66392000	1000	*	9.60264e-06	0.0052646	22.6813	Distal Intergenic	18	66458604	66465558	6955	1	Pmaip1	NM_021451.2	-66604	NA	NA	NA	53	19	34	73	48	25	67	8	59	67	7	60	71	44	27
chr18	66676001	66677000	1000	*	3.2795e-05	0.0126621	-39.375	Promoter (1-2kb)	18	66673014	66674515	1502	2	Gm30190	XR_386295.2	-1486	XR_386296.2;XR_386295.2	Gm22219;Gm30190	0;-1486	32	26	6	5	2	3	31	31	0	11	11	0	10	10	0
chr18	66968001	66969000	1000	*	2.51218e-05	0.0104762	-44.252	Distal Intergenic	18	66924762	66949961	25200	2	Gm19784	NR_040461.1	-18040	NA	NA	NA	5	2	3	43	23	20	36	30	6	5	5	0	29	26	3
chr18	67304001	67305000	1000	*	0.000127021	0.031064	54.8447	Promoter (<=1kb)	18	67289513	67305817	16305	2	Gm30321	XR_001782493.1	817	XR_001782491.1;XR_001782492.1;XR_001782495.1;XR_001782496.1;XR_001782497.1;XR_386300.3;XR_877509.2;XR_386299.3;XR_001782493.1;XR_001782494.1;NM_053261.2	Gm30321;Gm30321;Gm30321;Gm30321;Gm30321;Gm30321;Gm30321;Gm30321;Gm30321;Gm30321;Impa2	-3832;-3832;-3832;-3832;-3832;-3832;-3832;-1836;0;0;0	46	36	10	5	5	0	21	9	12	5	1	4	5	2	3
chr18	67642001	67643000	1000	*	1.65997e-05	0.00783323	-20.8275	Promoter (<=1kb)	18	67641599	67654162	12564	1	Psmg2	NM_134138.1	402	XM_006525899.2;NM_001081073.1;NM_134138.1	Cep76;Cep76;Psmg2	-732;-665;0	23	7	16	58	6	52	34	13	21	16	3	13	36	24	12
chr18	67968001	67969000	1000	*	0.000147537	0.0342086	-41.1799	Intron (XM_006526085.3/Ldlrad4, intron 1 of 6)	18	67933554	68257097	323544	1	Ldlrad4	XM_006526089.3	34447	XM_006526085.3;NM_172631.3;XM_006526087.3;XM_006526086.3;XM_006526089.3	Ldlrad4;Ldlrad4;Ldlrad4;Ldlrad4;Ldlrad4	0;0;0;0;0	5	2	3	18	10	8	34	29	5	46	46	0	76	62	14
chr18	68519001	68520000	1000	*	1.8852e-10	8.68756e-07	20.0308	Intron (XR_001782507.1/Gm29677, intron 1 of 2)	18	68559244	68565629	6386	1	Gm29677	XR_001782506.1	-39244	XR_001782507.1;XR_877523.1	Gm29677;Gm29677	0;0	103	22	81	105	40	65	143	5	138	197	18	179	158	26	132
chr18	69343001	69344000	1000	*	0.000213222	0.0428501	-39.6014	Promoter (<=1kb)	18	69344488	69684234	339747	1	Tcf4	XM_017317857.1	-488	XM_017317857.1;XM_017317854.1;XM_006525753.3;XM_017317859.1;NM_013685.2;NM_001083967.1;XM_006525747.3;XM_017317855.1;XM_017317856.1;XM_006525752.3;XM_017317858.1;XM_006525751.3;XM_006525746.3;XM_006525748.3;XM_006525749.3;XM_006525750.3	Tcf4;Tcf4;Tcf4;Tcf4;Tcf4;Tcf4;Tcf4;Tcf4;Tcf4;Tcf4;Tcf4;Tcf4;Tcf4;Tcf4;Tcf4;Tcf4	0;0;0;0;0;0;0;0;0;0;0;0;0;0;0;0	48	20	28	23	9	14	10	5	5	10	10	0	10	9	1
chr18	69676001	69677000	1000	*	1.31859e-05	0.0065765	35.7118	Intron (XM_017317857.1/Tcf4, intron 16 of 19)	18	69636971	69654954	17984	2	Gm31439	XR_877535.1	-21047	XM_017317857.1;XM_017317854.1;XM_006525753.3;XM_017317859.1;NM_013685.2;NM_001083967.1;XM_006525747.3;XM_017317855.1;XM_017317856.1;XM_006525752.3;XM_017317858.1;XM_006525751.3;XM_006525746.3;XM_006525748.3;XM_006525749.3;XM_006525750.3;XM_017317861.1;XM_017317863.1;XM_006525759.3;XM_017317860.1;XM_006525757.3;XM_006525760.3;XM_006525766.3;XM_006525762.3;XM_006525764.3;XM_017317862.1;XM_006525761…	Tcf4;Tcf4;Tcf4;Tcf4;Tcf4;Tcf4;Tcf4;Tcf4;Tcf4;Tcf4;Tcf4;Tcf4;Tcf4;Tcf4;Tcf4;Tcf4;Tcf4;Tcf4;Tcf4;Tcf4;Tcf4;Tcf4;Tcf4;Tcf4;Tcf4;Tcf4;Tcf4;Tcf4	0;0;0;0;0;0;0;0;0;0;0;0;0;0;0;0;0;0;0;0;0;0;0;0;0;0;0;0	28	28	0	29	28	1	10	8	2	6	2	4	39	29	10
chr18	69806001	69807000	1000	*	0.000228867	0.0446948	25.2856	Distal Intergenic	18	69795956	69798108	2153	1	Gm31564	XR_386324.1	10045	NA	NA	NA	28	25	3	10	8	2	61	27	34	30	23	7	21	12	9
chr18	70574001	70575000	1000	*	1.23795e-08	3.01939e-05	-22.3287	Intron (XM_006525710.3/Mbd2, intron 1 of 2)	18	70568292	70626131	57840	1	Mbd2	NM_010773.2	5709	XM_006525710.3;XM_006525711.3;XR_001782347.1;NM_001311071.1;NM_010773.2	Mbd2;Mbd2;Mbd2;Mbd2;Mbd2	0;0;0;0;0	22	16	6	85	63	22	97	95	2	46	45	1	47	43	4
chr18	70577001	70578000	1000	*	0.000268919	0.0492669	25.879	Intron (XM_006525710.3/Mbd2, intron 1 of 2)	18	70568292	70626131	57840	1	Mbd2	NM_010773.2	8709	XM_006525710.3;XM_006525711.3;XR_001782347.1;NM_001311071.1;NM_010773.2	Mbd2;Mbd2;Mbd2;Mbd2;Mbd2	0;0;0;0;0	20	19	1	21	19	2	33	18	15	21	19	2	27	15	12
chr18	72930001	72931000	1000	*	9.05157e-06	0.00505957	-32.3041	Distal Intergenic	18	72908890	72921090	12201	2	Gm31908	XR_386329.1	-8911	NA	NA	NA	68	28	40	35	15	20	20	13	7	17	14	3	41	31	10
chr18	73110001	73111000	1000	*	9.14467e-07	0.000905413	-22.5119	Distal Intergenic	18	73180410	73184544	4135	2	Gm31960	XR_386330.2	73544	NA	NA	NA	20	17	3	37	23	14	44	43	1	54	50	4	49	48	1
chr18	73274001	73275000	1000	*	3.63664e-05	0.0136199	42.9128	Distal Intergenic	18	73180410	73184544	4135	2	Gm31960	XR_386330.2	-89457	NA	NA	NA	11	11	0	58	42	16	54	28	26	33	12	21	12	5	7
chr18	73570001	73571000	1000	*	4.40274e-07	0.000504901	35.5649	Promoter (1-2kb)	18	73572592	73580457	7866	1	Mex3c	XM_011246932.2	-1592	XM_011246932.2;NM_001039214.4	Mex3c;Mex3c	-1592;-1705	19	19	0	14	13	1	19	4	15	5	5	0	13	8	5
chr18	74101001	74102000	1000	*	8.76487e-07	0.000877364	-30.6782	Exon (XR_001782478.1/Gm32801, exon 2 of 3)	18	74089439	74103187	13749	1	Gm32801	XR_386339.2	11562	XR_001782478.1;XR_386339.2	Gm32801;Gm32801	0;0	33	16	17	21	18	3	30	28	2	28	28	0	5	5	0
chr18	75412001	75413000	1000	*	2.27298e-05	0.00977624	22.5	Distal Intergenic	18	75395773	75398668	2896	2	Gm41776	XR_877560.2	-13333	NA	NA	NA	10	2	8	44	11	33	17	0	17	10	0	10	20	0	20
chr18	75416001	75417000	1000	*	0.000163435	0.0364322	-30.2083	Distal Intergenic	18	75395773	75398668	2896	2	Gm41776	XR_877560.2	-17333	NA	NA	NA	12	10	2	16	9	7	7	7	0	6	6	0	15	15	0
chr18	77201001	77202000	1000	*	3.5518e-06	0.00256448	-38.6275	Intron (XM_006526429.3/St8sia5, intron 1 of 7)	18	77177567	77186036	8470	2	LOC108168393	XM_017318026.1	-14965	XM_006526429.3;XM_006526430.3;NM_013666.2;NM_153124.2	St8sia5;St8sia5;St8sia5;St8sia5	0;0;0;0	10	4	6	34	27	7	20	19	1	12	12	0	40	40	0
chr18	77258001	77259000	1000	*	4.53678e-06	0.00305507	27.2718	Distal Intergenic	18	77247616	77255450	7835	1	St8sia5	XM_006526431.3	10385	XM_006526429.3;XM_006526430.3;NM_013666.2;NM_153124.2;XM_006526431.3	St8sia5;St8sia5;St8sia5;St8sia5;St8sia5	0;0;0;0;10385	15	7	8	88	31	57	34	0	34	6	2	4	13	1	12
chr18	79894001	79895000	1000	*	0.000136726	0.0325314	-22.0935	Distal Intergenic	18	79958991	79959707	717	1	Gm5823	Gm5823	-63991	NA	NA	NA	57	35	22	61	33	28	41	33	8	43	36	7	77	58	19
chr18	80150001	80151000	1000	*	2.61176e-06	0.00202149	27.1512	Promoter (<=1kb)	18	80126321	80151456	25136	2	Adnp2	XM_006526466.2	456	XM_006526466.2;XM_006526465.3;NM_175028.1	Adnp2;Adnp2;Adnp2	0;0;0	11	3	8	31	11	20	40	1	39	61	3	58	19	1	18
chr18	80321001	80322000	1000	*	1.81062e-05	0.00832085	-24.2537	Intron (XM_017317904.1/Kcng2, intron 2 of 2)	18	80316704	80320916	4213	1	Gm29913	XR_386385.2	4297	XR_386385.2;XM_017317904.1;XM_006526467.3;NM_001190373.1	Gm29913;Kcng2;Kcng2;Kcng2	4297;0;0;0	39	32	7	28	17	11	39	38	1	19	17	2	28	28	0
chr18	81054001	81055000	1000	*	3.70326e-05	0.0137924	-30.2941	Distal Intergenic	18	80996778	80997509	732	2	Gm7503	Gm7503	-56492	NA	NA	NA	63	35	28	68	54	14	15	14	1	11	11	0	10	10	0
chr18	81167001	81168000	1000	*	2.47225e-05	0.0103615	20.233	Distal Intergenic	18	81264674	81330128	65455	1	Gm30192	XR_386392.1	-96674	NA	NA	NA	59	44	15	89	83	6	46	24	22	97	89	8	87	41	46
chr18	82555001	82556000	1000	*	7.26468e-07	0.000760699	40	Promoter (<=1kb)	18	82554508	82585637	31130	1	Mbp	NM_001025254.2	493	NM_001025245.1;XM_006526456.2;XM_006526458.2;NM_010777.3;XM_006526454.2;XM_006526452.3;XM_006526453.2;XM_006526457.2;XM_006526455.1;NM_001025251.2;NM_001025255.2;NM_001025256.2;NM_001025258.2;NM_001025259.2;NM_001025254.2	Mbp;Mbp;Mbp;Mbp;Mbp;Mbp;Mbp;Mbp;Mbp;Mbp;Mbp;Mbp;Mbp;Mbp;Mbp	0;0;0;0;0;0;0;0;0;0;0;0;0;0;0	12	12	0	5	1	4	15	7	8	35	0	35	15	2	13
chr18	82561001	82562000	1000	*	4.09933e-06	0.00284873	26.7328	Exon (XM_006526452.3/Mbp, exon 5 of 10)	18	82554508	82585637	31130	1	Mbp	NM_001025254.2	6493	NM_001025245.1;XM_006526456.2;XM_006526458.2;NM_010777.3;XM_006526454.2;XM_006526452.3;XM_006526453.2;XM_006526457.2;XM_006526455.1;NM_001025251.2;NM_001025255.2;NM_001025256.2;NM_001025258.2;NM_001025259.2;NM_001025254.2	Mbp;Mbp;Mbp;Mbp;Mbp;Mbp;Mbp;Mbp;Mbp;Mbp;Mbp;Mbp;Mbp;Mbp;Mbp	0;0;0;0;0;0;0;0;0;0;0;0;0;0;0	51	15	36	89	46	43	38	11	27	10	0	10	64	8	56
chr18	82569001	82570000	1000	*	1.86946e-11	1.11944e-07	-56.5476	Intron (XM_006526456.2/Mbp, intron 4 of 8)	18	82554508	82585637	31130	1	Mbp	NM_001025254.2	14493	XM_006526456.2;XM_006526458.2;NM_010777.3;XM_006526454.2;XM_006526452.3;XM_006526453.2;XM_006526457.2;XM_006526455.1;NM_001025251.2;NM_001025255.2;NM_001025256.2;NM_001025258.2;NM_001025259.2;NM_001025254.2	Mbp;Mbp;Mbp;Mbp;Mbp;Mbp;Mbp;Mbp;Mbp;Mbp;Mbp;Mbp;Mbp;Mbp	0;0;0;0;0;0;0;0;0;0;0;0;0;0	28	2	26	51	17	34	64	56	8	35	15	20	5	5	0
chr18	82839001	82840000	1000	*	2.80287e-06	0.00213471	-45.1025	Distal Intergenic	18	82855897	82859162	3266	1	4930445N18Rik	NR_125720.1	-15897	NA	NA	NA	73	36	37	20	3	17	17	16	1	22	13	9	42	33	9
chr18	83193001	83194000	1000	*	0.000175037	0.0380267	-54.5767	Distal Intergenic	18	83179757	83180574	818	1	Gm41796	XR_877620.1	13244	NA	NA	NA	5	1	4	10	3	7	5	4	1	27	21	6	21	17	4
chr18	83227001	83228000	1000	*	1.08723e-05	0.00576472	-28.8097	Intron (XR_386408.3/Gm31089, intron 2 of 2)	18	83218089	83272680	54592	1	Gm31089	XR_877622.1	8912	XR_386408.3;XR_877622.1	Gm31089;Gm31089	0;0	13	2	11	5	5	0	26	25	1	11	8	3	32	29	3
chr18	83677001	83678000	1000	*	1.8462e-07	0.000252558	-32.9634	Distal Intergenic	18	83636708	83637968	1261	2	Gm31621	XR_877629.2	-39033	NA	NA	NA	87	35	52	25	6	19	36	26	10	26	14	12	120	83	37
chr18	83997001	83998000	1000	*	7.89744e-08	0.000131405	-39.8855	Exon (XR_386424.3/Gm31792, exon 2 of 5)	18	83980608	84003622	23015	2	Gm31792	XR_386424.3	5622	XR_386424.3;XR_877632.2;XR_877633.2;XR_877634.2;XR_877635.2	Gm31792;Gm31792;Gm31792;Gm31792;Gm31792	0;0;0;0;0	130	58	72	56	3	53	20	14	6	5	2	3	26	22	4
chr18	84702001	84703000	1000	*	8.30144e-06	0.00472747	30.989	Distal Intergenic	18	84712531	84713664	1134	1	Gm2390	Gm2390	-9531	NA	NA	NA	33	24	9	28	15	13	31	4	27	31	9	22	11	6	5
chr19	3449001	3450000	1000	*	4.39129e-05	0.0155169	-36.9079	Distal Intergenic	19	3409917	3414457	4541	2	Gal	NM_010253.3	-34544	XM_006531789.1;XM_006531792.1;XM_006531794.1;XM_006531796.1;XM_011248640.1;XM_011248641.1;XM_017318248.1;XM_017318249.1;XM_017318250.1;XR_001782600.1;NM_001164159.1;NM_028999.1;NM_029456.2	Ppp6r3;Ppp6r3;Ppp6r3;Ppp6r3;Ppp6r3;Ppp6r3;Ppp6r3;Ppp6r3;Ppp6r3;Ppp6r3;Ppp6r3;Ppp6r3;Ppp6r3	125744;125744;125744;125744;125744;125744;125744;125744;125744;125744;125749;125749;125749	24	13	11	24	14	10	30	27	3	5	5	0	19	17	2
chr19	5024001	5025000	1000	*	3.35374e-07	0.000409928	-40.2023	Promoter (<=1kb)	19	5024006	5031972	7967	1	Slc29a2	NM_007854.3	0	XR_879471.2;NM_007854.3;XM_006531664.2;XM_017318055.1;XM_017318056.1;XM_017318057.1	Gm42063;Slc29a2;Slc29a2;Slc29a2;Slc29a2;Slc29a2	-2236;0;0;0;0;0	25	0	25	61	5	56	20	7	13	13	8	5	11	4	7
chr19	6988001	6989000	1000	*	0.000127924	0.031178	-27.4603	Promoter (<=1kb)	19	6982472	6987651	5180	2	Vegfb	NM_011697.3	-350	NM_020566.1;XM_006527239.3;XM_006527237.3;XM_011247304.2;XR_386530.1;XR_877702.2;NM_026675.2;XM_006527315.1;NM_001185164.1;NM_011697.3	Dnajc4;Dnajc4;Dnajc4;Dnajc4;Gm35838;Gm41803;Nudt22;Nudt22;Vegfb;Vegfb	0;0;0;0;-3674;7473;7037;7115;-350;-350	15	12	3	42	15	27	12	11	1	6	5	1	21	17	4
chr19	13285001	13286000	1000	*	0.000178179	0.0384503	28.0323	Promoter (1-2kb)	19	13282134	13283056	923	2	Olfr1464-ps1	Olfr1464-ps1	-1945	Olfr1464-ps1	Olfr1464-ps1	-1945	38	22	16	29	17	12	15	4	11	46	9	37	27	12	15
chr19	13516001	13517000	1000	*	0.000150524	0.0346463	26.1649	Distal Intergenic	19	13527924	13530622	2699	1	Olfr1480	XM_006527173.1	-10924	NA	NA	NA	54	33	21	44	22	22	39	13	26	31	4	27	31	13	18
chr19	13599001	13600000	1000	*	1.22691e-05	0.00629732	40.3039	Distal Intergenic	19	13585306	13586253	948	1	Olfr1484	NM_146291.1	13695	NA	NA	NA	42	31	11	40	27	13	14	7	7	10	2	8	19	4	15
chr19	14426001	14427000	1000	*	7.62285e-08	0.000127686	-31.823	Intron (XR_386563.2/Gm8630, intron 2 of 5)	19	14397487	14435950	38464	2	Gm8630	XR_386563.2	8950	XR_386563.2	Gm8630	0	63	39	24	60	38	22	49	45	4	5	5	0	47	43	4
chr19	14915001	14916000	1000	*	3.02959e-05	0.0119794	-22.1622	Distal Intergenic	19	14959002	14960782	1781	2	Gm5513	Gm5513	44782	NA	NA	NA	74	56	18	30	24	6	5	5	0	20	20	0	15	15	0
chr19	14973001	14974000	1000	*	4.2951e-05	0.0152525	-21.0173	Distal Intergenic	19	14959002	14960782	1781	2	Gm5513	Gm5513	-12219	NA	NA	NA	88	49	39	85	36	49	64	49	15	105	56	49	96	77	19
chr19	15304001	15305000	1000	*	0.000114189	0.0290024	-33.9043	Intron (XR_001782639.1/LOC108168406, intron 2 of 2)	19	15290167	15340387	50221	2	LOC108168406	XR_001782639.1	35387	XR_001782639.1;XR_001782640.1	LOC108168406;LOC108168406	0;0	11	5	6	11	8	3	23	22	1	31	31	0	18	15	3
chr19	16051001	16052000	1000	*	0.000248273	0.046968	29.3543	Distal Intergenic	19	16064113	16089392	25280	1	Gm32026	XR_001782649.1	-12113	NA	NA	NA	21	16	5	46	37	9	32	11	21	16	6	10	28	21	7
chr19	16606001	16607000	1000	*	0.000217903	0.0433811	28.8889	Intron (NM_008137.4/Gna14, intron 5 of 6)	19	16580085	16583462	3378	2	Gm41811	XR_877742.2	-22539	NM_008137.4	Gna14	0	23	23	0	15	15	0	10	7	3	5	3	2	6	5	1
chr19	18714001	18715000	1000	*	9.20814e-09	2.37936e-05	45.5362	Promoter (<=1kb)	19	18713236	18718428	5193	1	D030056L22Rik	NM_177640.4	765	XM_006526950.3;NM_177640.4	D030056L22Rik;D030056L22Rik	0;0	5	4	1	75	42	33	78	13	65	46	8	38	27	9	18
chr19	21480001	21481000	1000	*	0.000210244	0.0424699	-26.0621	Distal Intergenic	19	21391307	21472661	81355	2	Gda	NM_010266.2	-7340	NA	NA	NA	27	18	9	36	25	11	17	14	3	5	5	0	31	31	0
chr19	21715001	21716000	1000	*	5.40897e-06	0.00346063	-25.4529	Promoter (1-2kb)	19	21713818	21732331	18514	1	Gm41818	XR_877759.1	1183	XR_877759.1	Gm41818	0	50	20	30	112	56	56	64	44	20	46	38	8	5	3	2
chr19	23498001	23499000	1000	*	5.2377e-05	0.0173837	31.3137	Promoter (1-2kb)	19	23496764	23523052	26289	1	Gm34012	XR_386614.2	1237	XR_386614.2	Gm34012	0	21	15	6	76	27	49	38	5	33	30	4	26	5	2	3
chr19	23760001	23761000	1000	*	2.05499e-06	0.00168719	28.3551	Promoter (1-2kb)	19	23758876	23949597	190722	1	Apba1	NM_177034.3	1125	XM_006527139.3;XM_006527140.3;NM_177034.3	Apba1;Apba1;Apba1	0;0;0	52	49	3	95	72	23	28	16	12	22	13	9	67	36	31
chr19	23859001	23860000	1000	*	0.000142419	0.0334709	-45.9016	Intron (XM_006527139.3/Apba1, intron 1 of 12)	19	23905122	23917546	12425	2	Gm34076	XR_386615.2	57546	XM_006527139.3;XM_006527140.3;NM_177034.3	Apba1;Apba1;Apba1	0;0;0	11	2	9	29	14	15	46	31	15	15	13	2	24	20	4
chr19	24156001	24157000	1000	*	9.04628e-08	0.00014474	-39.4513	Intron (NM_001198985.1/Tjp2, intron 1 of 22)	19	24094642	24147132	52491	2	Tjp2	XM_006526904.3	-8869	NM_001198985.1;NM_011597.4;XM_017318136.1;XM_017318137.1;XM_011247219.2;XM_006526908.3	Tjp2;Tjp2;Tjp2;Tjp2;Tjp2;Tjp2	0;0;0;0;0;0	38	17	21	49	31	18	22	22	0	23	23	0	56	45	11
chr19	24175001	24176000	1000	*	1.01559e-08	2.57112e-05	29.8677	Promoter (<=1kb)	19	24094502	24174140	79639	2	Tjp2	NM_001198985.1	-861	NM_001198985.1;NM_011597.4;XM_017318136.1;XM_017318137.1;XM_011247219.2;XM_006526908.3	Tjp2;Tjp2;Tjp2;Tjp2;Tjp2;Tjp2	0;0;0;0;0;0	40	12	28	70	26	44	45	5	40	21	0	21	38	0	38
chr19	24279001	24280000	1000	*	8.82519e-08	0.000142342	37.465	Promoter (<=1kb)	19	24261453	24280586	19134	2	Fxn	NM_008044.2	586	NM_008044.2	Fxn	0	41	34	7	15	7	8	65	24	41	64	19	45	13	2	11
chr19	24860001	24861000	1000	*	2.82224e-05	0.0113938	-26.3437	Promoter (<=1kb)	19	24678261	24861842	183582	2	Pgm5	NM_175013.2	842	NM_175013.2	Pgm5	0	62	10	52	29	8	21	20	12	8	22	3	19	31	22	9
chr19	25132001	25133000	1000	*	0.000213526	0.042868	31.6194	Exon (XM_006527436.3/Dock8, exon 22 of 27)	19	25153231	25155877	2647	2	Gm34186	XR_386617.1	22877	XM_006527436.3;NM_028785.3;XM_011247397.2;XM_006527435.3	Dock8;Dock8;Dock8;Dock8	0;0;0;0	31	30	1	54	48	6	11	7	4	10	8	2	10	4	6
chr19	26853001	26854000	1000	*	0.000143771	0.0337052	-49.6296	Intron (XR_001782660.1/LOC108168409, intron 4 of 6)	19	26768801	26823907	55107	2	4931403E22Rik	NR_045306.1	-29094	XR_001782660.1;XR_001782661.1;XR_001782662.1	LOC108168409;LOC108168409;LOC108168409	0;0;0	5	1	4	15	11	4	9	8	1	9	9	0	22	22	0
chr19	27009001	27010000	1000	*	1.23508e-05	0.00633051	41.8313	Distal Intergenic	19	26885925	26888647	2723	1	Gm815	NM_001033407.2	123076	NA	NA	NA	17	12	5	38	30	8	14	8	6	10	0	10	60	25	35
chr19	27324001	27325000	1000	*	3.48253e-05	0.0132064	24.1485	Promoter (1-2kb)	19	27322619	27337179	14561	1	Kcnv2	NM_183179.1	1382	XR_386629.2;XM_006527067.3;NM_183179.1	Gm35268;Kcnv2;Kcnv2	11369;0;0	22	20	2	32	31	1	20	8	12	10	10	0	39	27	12
chr19	28012001	28013000	1000	*	1.17555e-07	0.000178383	31.2737	Promoter (<=1kb)	19	27762686	28011693	249008	2	Rfx3	XM_006526780.3	-308	NM_011265.3;XM_006526784.3;XM_017318086.1;XM_006526782.3;XM_011247169.2;XM_017318087.1;XM_006526778.3;XM_006526780.3	Rfx3;Rfx3;Rfx3;Rfx3;Rfx3;Rfx3;Rfx3;Rfx3	-835;-308;-308;-956;-309;-309;-308;-308	48	13	35	47	29	18	41	0	41	56	3	53	50	17	33
chr19	28440001	28441000	1000	*	0.000181081	0.0388419	32.45	Intron (NM_001305671.1/Glis3, intron 3 of 9)	19	28362542	28365815	3274	2	Gm35866	XR_386638.2	-74186	NM_001305671.1;NM_175459.6;XM_006526985.3;XM_006526984.3;XM_006526987.3	Glis3;Glis3;Glis3;Glis3;Glis3	0;0;0;0;0	16	15	1	37	33	4	6	3	3	5	4	1	17	8	9
chr19	28559001	28560000	1000	*	5.40968e-07	0.000593167	34.1176	Promoter (1-2kb)	19	28262179	28561223	299045	2	Glis3	XM_006526985.3	1223	NM_001305671.1;NM_175459.6;XM_006526985.3;XM_006526984.3;XM_006526987.3;XM_006526988.3	Glis3;Glis3;Glis3;Glis3;Glis3;Glis3	0;0;0;0;0;0	17	15	2	42	28	14	8	4	4	24	0	24	5	4	1
chr19	28628001	28629000	1000	*	4.80165e-06	0.00317573	29.1833	Intron (NM_001305671.1/Glis3, intron 2 of 9)	19	28262179	28678193	416015	2	Glis3	XM_006526984.3	49193	NM_001305671.1;NM_175459.6;XM_006526984.3;XM_006526987.3;XM_006526988.3	Glis3;Glis3;Glis3;Glis3;Glis3	0;0;0;0;0	57	48	9	44	42	2	28	13	15	24	16	8	61	42	19
chr19	29060001	29061000	1000	*	9.71239e-05	0.0261789	21.9477	Distal Intergenic	19	29067301	29069503	2203	1	Gm9895	NR_045687.1	-6301	NA	NA	NA	30	25	5	85	68	17	69	45	24	21	14	7	55	26	29
chr19	29152001	29153000	1000	*	5.25816e-11	2.69649e-07	50.9246	Distal Intergenic	19	29135338	29135356	19	1	Mir101b	NA	16663	NA	NA	NA	37	33	4	27	20	7	15	7	8	25	0	25	11	5	6
chr19	29502001	29503000	1000	*	8.93967e-08	0.000143494	-35.5576	Downstream (<1kb)	19	29503663	29521987	18325	2	A930007I19Rik	NR_015567.2	18987	NR_015567.2	A930007I19Rik	18987	65	28	37	71	28	43	28	22	6	34	30	4	66	42	24
chr19	29812001	29813000	1000	*	0.000179951	0.0386882	45.5109	Promoter (<=1kb)	19	29808108	29812974	4867	2	Ranbp6	NM_177721.4	0	XR_001782588.1;XM_017318197.1;XR_001782590.1;XR_001782589.1;NM_177721.4	9930021J03Rik;9930021J03Rik;9930021J03Rik;9930021J03Rik;Ranbp6	-3948;-3948;-3948;-3948;0	19	5	14	5	4	1	59	2	57	24	1	23	26	4	22
chr19	29925001	29926000	1000	*	0.000151266	0.0347338	-24.4919	Promoter (<=1kb)	19	29925114	29960715	35602	1	Il33	NM_133775.2	0	XR_877808.1;NM_133775.2;XM_011247399.2	Gm41832;Il33;Il33	0;0;0	71	44	27	33	26	7	23	23	0	26	22	4	5	5	0
chr19	30170001	30171000	1000	*	2.74559e-05	0.0111655	24.0408	Intron (NM_138595.2/Gldc, intron 2 of 24)	19	30098441	30175441	77001	2	Gldc	NM_138595.2	4441	NM_138595.2	Gldc	0	37	36	1	18	17	1	34	20	14	15	13	2	10	7	3
chr19	30238001	30239000	1000	*	4.79902e-06	0.00317573	-26.3083	Exon (XM_006526730.1/Mbl2, exon 5 of 6)	19	30232957	30239682	6726	1	Mbl2	NM_010776.1	5044	XM_006526730.1;NM_010776.1	Mbl2;Mbl2	0;0	31	12	19	53	6	47	40	9	31	20	11	9	51	39	12
chr19	30366001	30367000	1000	*	6.59755e-09	1.82253e-05	-24.3314	Distal Intergenic	19	30352005	30355618	3614	2	Gm36006	Gm36006	-10383	XR_386647.2	Gm36319	28327	18	14	4	56	29	27	79	72	7	89	84	5	66	54	12
chr19	31073001	31074000	1000	*	2.01711e-08	4.61581e-05	-31.4982	Intron (NM_011160.3/Prkg1, intron 3 of 17)	19	31082841	31086592	3752	1	Cstf2t	NM_031249.2	-8841	NM_011160.3;NM_001013833.3;XM_006526768.3	Prkg1;Prkg1;Prkg1	0;0;0	94	34	60	48	24	24	40	28	12	20	16	4	80	59	21
chr19	31426001	31427000	1000	*	6.8365e-06	0.00409126	-20.9398	Intron (NM_011160.3/Prkg1, intron 2 of 17)	19	31213543	31216396	2854	2	8430431K14Rik	NR_002849.1	-209605	NM_011160.3;NM_001013833.3;XM_006526768.3	Prkg1;Prkg1;Prkg1	0;0;0	47	3	44	70	19	51	118	39	79	49	10	39	114	68	46
chr19	31972001	31973000	1000	*	2.39079e-05	0.0101048	44.1937	Distal Intergenic	19	31982597	32068739	86143	2	Asah2	XM_011247289.1	95739	NA	NA	NA	15	11	4	11	11	0	11	5	6	16	9	7	35	9	26
chr19	32341001	32342000	1000	*	7.34316e-06	0.00430179	28.9235	Intron (NM_001168525.1/Sgms1, intron 1 of 9)	19	32122727	32349316	226590	2	Sgms1	NM_001168525.1	7316	NM_001168525.1;NM_144792.4;XM_011247201.2;XR_001782566.1;XM_011247202.2;XM_011247203.2;XR_001782565.1;XM_011247205.2;XM_011247206.2;XM_017318105.1	Sgms1;Sgms1;Sgms1;Sgms1;Sgms1;Sgms1;Sgms1;Sgms1;Sgms1;Sgms1	0;0;0;0;0;0;0;0;0;0	23	20	3	17	15	2	7	6	1	5	3	2	33	10	23
chr19	32395001	32396000	1000	*	6.72245e-05	0.0205768	33.2192	Distal Intergenic	19	32122730	32389712	266983	2	Sgms1	XM_011247202.2	-5289	NR_033198.1	2700046G09Rik	5785	41	27	14	38	34	4	12	7	5	16	0	16	12	9	3
chr19	32868001	32869000	1000	*	0.000113245	0.0289107	-40	Distal Intergenic	19	32933345	32939008	5664	1	Gm36774	XR_001782638.1	-64345	NA	NA	NA	5	5	0	5	1	4	23	23	0	10	10	0	10	10	0
chr19	33178001	33179000	1000	*	4.9916e-06	0.00326035	47.9167	Intron (XM_017318288.1/Rnls, intron 3 of 4)	19	33157122	33157141	20	1	Mir3970	NA	20879	XM_017318288.1;NM_001146342.2;NM_001167818.1	Rnls;Rnls;Rnls	0;0;0	15	15	0	12	12	0	16	5	11	5	2	3	20	17	3
chr19	34168001	34169000	1000	*	6.66236e-05	0.0204367	-22.6068	Promoter (1-2kb)	19	34122549	34166041	43493	2	Ankrd22	NM_024204.6	-1960	NM_024204.6	Ankrd22	-1960	18	1	17	13	9	4	80	58	22	5	1	4	16	14	2
chr19	34624001	34625000	1000	*	0.000219446	0.0436014	-44.7237	Promoter (<=1kb)	19	34623630	34624804	1175	1	Cnn2-ps	Cnn2-ps	371	Cnn2-ps;XM_006527265.3;XM_017318045.1;NM_053217.2	Cnn2-ps;Ifit1bl1;Ifit1bl2;Ifit1bl2	0;0;0;0	66	8	58	5	2	3	34	11	23	5	4	1	5	5	0
chr19	34921001	34922000	1000	*	3.79644e-05	0.0140194	-40.9711	Promoter (<=1kb)	19	34922341	34966133	43793	1	Kif20b	XM_011247247.2	-341	XM_011247247.2;XM_006527082.3;XM_006527083.3;XM_006527084.3;NM_183046.1;XM_006527080.2;XM_006527081.2	Kif20b;Kif20b;Kif20b;Kif20b;Kif20b;Kif20b;Kif20b	-341;-341;-341;-353;-358;-434;-558	39	3	36	43	2	41	6	3	3	10	2	8	7	5	2
chr19	36125001	36126000	1000	*	4.09174e-05	0.014761	20.6108	Distal Intergenic	19	36111965	36119844	7880	2	Ankrd1	NM_013468.3	-5157	NA	NA	NA	50	45	5	50	45	5	64	38	26	87	62	25	89	69	20
chr19	37264001	37265000	1000	*	3.27728e-06	0.00241687	-27.8282	Promoter (<=1kb)	19	37258423	37264095	5673	2	4931408D14Rik	NR_040298.1	0	NR_040298.1;NR_040299.1;NM_031156.3	4931408D14Rik;4931408D14Rik;Ide	0;0;69544	15	5	10	50	11	39	77	47	30	101	56	45	10	5	5
chr19	37692001	37693000	1000	*	3.78542e-07	0.000447668	29.9758	Exon (XM_017318259.1/Cyp26c1, exon 7 of 7)	19	37677387	37697564	20178	2	Gm32342	XR_877837.2	4564	XM_017318053.1;NM_007811.2;XM_017318259.1;NM_001105201.1;XR_877837.2;XR_877839.2;XR_877838.1	Cyp26a1;Cyp26a1;Cyp26c1;Cyp26c1;Gm32342;Gm32342;Gm32342	-4732;-4808;0;0;0;0;4564	36	28	8	10	5	5	5	4	1	17	0	17	23	5	18
chr19	38104001	38105000	1000	*	0.000223721	0.0441525	-22.4311	Intron (NM_181748.2/Ffar4, intron 1 of 2)	19	38097079	38114263	17185	1	Ffar4	NM_181748.2	6922	NM_181748.2	Ffar4	0	19	15	4	21	16	5	5	5	0	15	15	0	20	20	0
chr19	38434001	38435000	1000	*	4.34888e-05	0.0154052	-28.9683	Distal Intergenic	19	38458585	38463554	4970	1	LOC108168429	XR_001782727.1	-23585	NA	NA	NA	6	5	1	21	3	18	14	14	0	6	4	2	12	8	4
chr19	38525001	38526000	1000	*	1.1614e-06	0.00108542	34.3443	Promoter (<=1kb)	19	38524197	38785105	260909	1	Plce1	NM_019588.2	804	XM_011247378.1;XM_006527394.2;XM_011247379.1;XM_011247380.1;NM_019588.2	Plce1;Plce1;Plce1;Plce1;Plce1	0;0;0;0;0	25	25	0	10	8	2	36	21	15	68	30	38	62	40	22
chr19	38633001	38634000	1000	*	9.4121e-05	0.0257372	28.7879	Intron (XM_011247378.1/Plce1, intron 4 of 33)	19	38578392	38783633	205242	1	Plce1	XM_006527395.3	54609	XM_011247378.1;XM_006527394.2;XM_011247379.1;XM_011247380.1;NM_019588.2;XM_006527395.3	Plce1;Plce1;Plce1;Plce1;Plce1;Plce1	0;0;0;0;0;0	6	6	0	44	40	4	14	0	14	11	11	0	6	6	0
chr19	40755001	40756000	1000	*	4.38361e-05	0.0154952	27.9274	Promoter (<=1kb)	19	40754741	40829057	74317	1	Cc2d2b	XM_011247419.1	260	XM_011247419.1;XM_017318327.1	Cc2d2b;Cc2d2b	0;-387	21	21	0	52	51	1	10	8	2	27	27	0	15	5	10
chr19	41016001	41017000	1000	*	5.29002e-06	0.00339977	38.1003	Promoter (<=1kb)	19	41017683	41020295	2613	1	LOC105246575	LOC105246575	-683	XR_877855.2;XR_877856.2;LOC105246575	LOC100861913;LOC100861913;LOC105246575	-4304;-1358;-683	18	15	3	25	20	5	48	15	33	38	21	17	43	19	24
chr19	41802001	41803000	1000	*	3.9374e-05	0.0144016	-40.0366	Promoter (<=1kb)	19	41766588	41802084	35497	2	Arhgap19	NM_001163495.1	0	NM_001163495.1;NM_027667.3;XR_877860.1	Arhgap19;Arhgap19;Gm41847	0;0;16642	6	4	2	35	5	30	5	5	0	5	4	1	13	8	5
chr19	42158001	42159000	1000	*	5.11346e-08	9.46938e-05	-28.6518	Promoter (<=1kb)	19	42159631	42160768	1138	1	Gm6937	Gm6937	-631	Gm6937	Gm6937	-631	31	23	8	28	18	10	39	39	0	25	24	1	43	42	1
chr19	42363001	42364000	1000	*	1.17316e-06	0.00109533	-34.2326	Intron (XM_006527369.2/Crtac1, intron 2 of 14)	19	42387741	42397551	9811	2	Gm41848	XR_877861.1	33551	XM_006527369.2;XM_006527370.2;XM_006527371.2;XM_006527373.3;XM_006527372.3;NM_145123.4	Crtac1;Crtac1;Crtac1;Crtac1;Crtac1;Crtac1	0;0;0;0;0;0	59	24	35	68	30	38	46	31	15	24	15	9	25	25	0
chr19	43028001	43029000	1000	*	1.1504e-06	0.0010771	-29.553	Intron (XM_011247295.1/Hpse2, intron 2 of 10)	19	42759203	42779996	20794	2	Hps1	XM_006526775.3	-248005	XM_011247295.1;XM_006527214.3;NM_001081257.2;XM_011247294.2;XM_011247296.2	Hpse2;Hpse2;Hpse2;Hpse2;Hpse2	0;0;0;0;0	68	36	32	49	25	24	32	28	4	43	33	10	56	45	11
chr19	43471001	43472000	1000	*	6.48107e-05	0.0200466	34.2899	Exon (XM_006527483.3/Cnnm1, exon 5 of 8)	19	43440436	43497213	56778	1	Cnnm1	NM_031396.2	30565	XM_006527483.3;XM_006527485.3;XR_001782623.1;XM_006527480.3;XM_006527481.3;XM_006527482.3;NM_031396.2	Cnnm1;Cnnm1;Cnnm1;Cnnm1;Cnnm1;Cnnm1;Cnnm1	0;0;0;0;0;0;0	11	10	1	23	17	6	22	8	14	25	7	18	5	4	1
chr19	43929001	43930000	1000	*	0.000156235	0.0354194	-23.0317	Intron (NM_028029.4/Dnmbp, intron 1 of 15)	19	43846815	43924047	77233	2	Dnmbp	XM_006527350.3	-4954	XM_006527350.3;NM_028029.4;XM_006527351.3	Dnmbp;Dnmbp;Dnmbp	-4954;0;0	7	6	1	75	47	28	12	11	1	6	6	0	11	11	0
chr19	44695001	44696000	1000	*	2.6663e-08	5.74546e-05	24.5545	Promoter (<=1kb)	19	44685753	44695379	9627	2	Gm26644	XR_877881.1	0	XR_877881.1;XR_386741.2	Gm26644;Gm26644	0;0	55	54	1	20	19	1	78	50	28	52	44	8	92	62	30
chr19	46393001	46394000	1000	*	6.27827e-06	0.00386117	23.914	Promoter (1-2kb)	19	46376814	46395735	18922	2	Actr1a	NM_016860.1	1735	NM_016860.1;NM_001025391.2;NM_015752.3	Actr1a;Sufu;Sufu	0;-2896;-2896	56	55	1	52	50	2	18	8	10	10	9	1	41	35	6
chr19	46804001	46805000	1000	*	2.63027e-05	0.0108345	-35.3658	Intron (XM_006527489.3/Cnnm2, intron 1 of 3)	19	46761609	46878580	116972	1	Cnnm2	NM_033569.3	42392	XM_006527489.3;NM_001102471.1;NM_033569.3	Cnnm2;Cnnm2;Cnnm2	0;0;0	10	6	4	17	5	12	31	29	2	6	4	2	10	8	2
chr19	47013001	47014000	1000	*	9.50838e-06	0.00523812	-20.117	Promoter (<=1kb)	19	47014698	47024358	9661	1	Ina	NM_146100.4	-698	NM_146100.4;NM_001164363.1	Ina;Nt5c2	-698;0	36	3	33	38	7	31	28	13	15	37	20	17	6	0	6
chr19	47580001	47581000	1000	*	1.69243e-07	0.000236373	-33.1565	Promoter (<=1kb)	19	47580019	47645246	65228	1	Slk	NM_001164639.1	0	NM_001164639.1;NM_009289.3	Slk;Slk	0;0	28	0	28	10	0	10	49	36	13	45	0	45	50	13	37
chr19	47732001	47733000	1000	*	1.38358e-05	0.00683249	-24.9478	Promoter (<=1kb)	19	47731756	47735588	3833	1	Sfr1	NM_026377.2	245	XM_017318032.1;XM_017318031.1;XM_006526532.3;XM_011247103.2;NM_027559.2;XM_006527308.2;NM_026377.2	Cfap43;Cfap43;Cfap43;Cfap43;Cfap43;Sfr1;Sfr1	0;0;0;0;0;0;0	26	11	15	67	25	42	55	35	20	95	66	29	103	63	40
chr19	47756001	47757000	1000	*	5.0168e-06	0.00326979	-25.7032	Promoter (<=1kb)	19	47755022	47755157	136	2	Mir8090	NR_106165.1	-844	XM_017318032.1;XM_017318031.1;XM_006526532.3;XM_011247103.2;NM_027559.2;XM_006526533.3;XR_001782551.1;XM_006526534.3;NR_106165.1;NA	Cfap43;Cfap43;Cfap43;Cfap43;Cfap43;Cfap43;Cfap43;Cfap43;Mir8090;Mir8090	0;0;0;0;0;0;0;0;-844;-920	53	13	40	21	6	15	101	58	43	25	9	16	60	38	22
chr19	47786001	47787000	1000	*	1.1807e-08	2.91747e-05	27.1463	Exon (XM_017318031.1/Cfap43, exon 6 of 30)	19	47735267	47795687	60421	2	Cfap43	XM_017318032.1	8687	XM_017318032.1;XM_017318031.1;XM_006526532.3;XM_011247103.2;NM_027559.2;XM_006526533.3;XR_001782551.1;XM_006526534.3	Cfap43;Cfap43;Cfap43;Cfap43;Cfap43;Cfap43;Cfap43;Cfap43	0;0;0;0;0;0;0;0	28	24	4	27	20	7	54	21	33	62	12	50	12	12	0
chr19	47952001	47953000	1000	*	8.99048e-07	0.000894575	-23.5203	Exon (NM_001163267.1/Cfap58, exon 6 of 18)	19	47937712	48035379	97668	1	Cfap58	NM_001163267.1	14289	NM_001163267.1	Cfap58	0	82	15	67	30	14	16	5	2	3	10	4	6	25	22	3
chr19	48021001	48022000	1000	*	2.02076e-05	0.00900342	-21.7194	Intron (NM_001163267.1/Cfap58, intron 15 of 17)	19	47937712	48035379	97668	1	Cfap58	NM_001163267.1	83289	NM_001163267.1	Cfap58	0	23	13	10	39	33	6	80	73	7	15	13	2	95	94	1
chr19	48252001	48253000	1000	*	0.000128026	0.0311954	22.9949	Intron (NM_025696.3/Sorcs3, intron 1 of 26)	19	48206025	48805505	599481	1	Sorcs3	NM_025696.3	45976	NM_025696.3	Sorcs3	0	70	69	1	29	29	0	5	3	2	24	19	5	68	61	7
chr19	49868001	49869000	1000	*	0.000102481	0.027024	-23.6072	Promoter (<=1kb)	19	49868272	49870143	1872	1	Siah1-ps1	Siah1-ps1	0	Siah1-ps1	Siah1-ps1	0	84	28	56	128	43	85	40	30	10	18	9	9	132	61	71
chr19	53793001	53794000	1000	*	1.47004e-12	1.11367e-08	34.0948	Promoter (<=1kb)	19	53792903	53867083	74181	1	Rbm20	XM_006527385.3	98	XR_877920.1;XM_011247371.1;XM_011247374.1;NM_001170847.1;XM_011247372.2;XM_006527385.3	Gm30890;Rbm20;Rbm20;Rbm20;Rbm20;Rbm20	-4711;0;0;0;0;0	47	34	13	132	70	62	116	19	97	85	13	72	61	33	28
chr19	53943001	53944000	1000	*	6.13164e-07	0.000657901	39.822	Promoter (<=1kb)	19	53944232	54033128	88897	1	Shoc2	XM_006527228.3	-232	NM_001195338.1;NM_001195348.1;XM_006526550.3;XM_006526547.3;XM_011247106.2;XM_006526549.3;XM_006527228.3;NM_001168505.1;XM_011247299.2;XM_017318260.1;NM_019658.6	Bbip1;Bbip1;Bbip1;Bbip1;Bbip1;Bbip1;Shoc2;Shoc2;Shoc2;Shoc2;Shoc2	0;0;0;0;0;0;-232;-306;-824;-864;-876	32	18	14	33	13	20	10	0	10	5	1	4	25	1	24
chr19	55830001	55831000	1000	*	3.80508e-07	0.000449242	-32.0034	Intron (XM_017318115.1/Tcf7l2, intron 5 of 15)	19	55893126	55933661	40536	1	Tcf7l2	XM_017318134.1	-62126	XM_017318115.1;XR_001782574.1;XM_017318119.1;XM_017318126.1;XM_017318120.1;XM_017318121.1;XM_017318125.1;XM_017318131.1;XR_386455.3;XM_006526888.3;XM_017318122.1;XM_017318129.1;XR_001782575.1;XR_001782576.1;XM_006526861.3;XM_006526863.3;XM_006526866.3;XM_006526869.3;NM_001142918.1;NM_001142919.1;NM_001142920.1;NM_001142921.1;NM_001142922.1;NM_001142923.1;NM_009333.3;XM_006526867.3;XM_006526890.3;…	Tcf7l2;Tcf7l2;Tcf7l2;Tcf7l2;Tcf7l2;Tcf7l2;Tcf7l2;Tcf7l2;Tcf7l2;Tcf7l2;Tcf7l2;Tcf7l2;Tcf7l2;Tcf7l2;Tcf7l2;Tcf7l2;Tcf7l2;Tcf7l2;Tcf7l2;Tcf7l2;Tcf7l2;Tcf7l2;Tcf7l2;Tcf7l2;Tcf7l2;Tcf7l2;Tcf7l2;Tcf7l2;Tcf7l2;Tcf7l2;Tcf7l2;Tcf7l2;Tcf7l2;Tcf7l2;Tcf7l2;Tcf7l2;Tcf7l2;Tcf7l2;Tcf7l2;Tcf7l2;Tcf7l2;Tcf7l2;Tcf7l2;Tcf7l2;Tcf7l2;Tcf7l2	0;0;0;0;0;0;0;0;0;0;0;0;0;0;0;0;0;0;0;0;0;0;0;0;0;0;0;0;0;0;0;0;0;0;0;0;0;0;0;0;0;0;0;0;0;0	34	8	26	20	20	0	14	14	0	20	18	2	23	21	2
chr19	56028001	56029000	1000	*	1.00726e-05	0.00545836	63.3333	Distal Intergenic	19	56077954	56081392	3439	1	LOC102634217	XR_386811.2	-48954	NA	NA	NA	7	7	0	8	8	0	5	1	4	10	4	6	20	10	10
chr19	56460001	56461000	1000	*	0.00024812	0.0469604	-37.3851	Promoter (<=1kb)	19	56461637	56486729	25093	1	Plekhs1	NM_001164263.1	-637	XM_006527018.2;NM_001164263.1;NM_172641.3	Plekhs1;Plekhs1;Plekhs1	0;-637;-637	9	1	8	6	0	6	21	16	5	19	10	9	6	0	6
chr19	56595001	56596000	1000	*	2.75178e-08	5.86732e-05	34.833	Exon (NM_025811.3/Nhlrc2, exon 10 of 11)	19	56570686	56603503	32818	1	Nhlrc2	XM_006527267.3	24315	NM_025811.3;XR_001782612.1;XM_006527267.3	Nhlrc2;Nhlrc2;Nhlrc2	0;0;0	37	35	2	72	66	6	16	11	5	28	23	5	25	6	19
chr19	56679001	56680000	1000	*	2.03442e-07	0.000273077	-47.058	Distal Intergenic	19	56669067	56674549	5483	1	Gm32492	XR_386825.2	9934	XR_386825.2	Gm32492	9934	24	18	6	20	2	18	26	20	6	22	21	1	27	26	1
chr19	57109001	57110000	1000	*	3.38214e-07	0.000411762	-21.1039	Intron (NM_001103178.2/Ablim1, intron 1 of 20)	19	57033264	57119024	85761	2	Ablim1	NM_001103178.2	9024	NM_001103178.2;NM_001103177.2;NM_001290815.1;NM_001290816.1;NM_001290813.1;NM_178688.3;XM_017318186.1;XM_017318185.1;XM_017318184.1;XM_006527048.3;XM_017318182.1;XM_017318183.1;XM_017318173.1;XM_017318174.1;XM_017318181.1;XM_017318178.1;XM_006527041.3;XM_017318179.1;XM_006527037.3;XM_006527044.3;XM_006527039.3;XM_006527038.3;XM_017318177.1;XM_006527040.3;XM_006527033.3;XM_006527035.3;XM_006527034…	Ablim1;Ablim1;Ablim1;Ablim1;Ablim1;Ablim1;Ablim1;Ablim1;Ablim1;Ablim1;Ablim1;Ablim1;Ablim1;Ablim1;Ablim1;Ablim1;Ablim1;Ablim1;Ablim1;Ablim1;Ablim1;Ablim1;Ablim1;Ablim1;Ablim1;Ablim1;Ablim1;Ablim1;Ablim1;Ablim1;Ablim1;Ablim1;Ablim1	0;0;0;0;0;0;0;0;0;0;0;0;0;0;0;0;0;0;0;0;0;0;0;0;0;0;0;0;0;0;0;0;0	42	26	16	14	13	1	22	21	1	22	22	0	33	33	0
chr19	57505001	57506000	1000	*	0.000174068	0.0378973	-32.5264	Promoter (2-3kb)	19	57508564	57512788	4225	1	6720468P15Rik	NR_040306.1	-2564	NR_040306.1;NR_040307.1	6720468P15Rik;6720468P15Rik	-2564;-3066	53	15	38	108	53	55	31	19	12	17	14	3	20	14	6
chr19	57607001	57608000	1000	*	4.2804e-05	0.0152143	43.7304	Promoter (2-3kb)	19	57610963	57685588	74626	1	Atrnl1	XR_001782587.1	-2963	XR_001782587.1;XM_006527052.2;XM_006527051.2;XM_006527049.2;XM_011247244.1;NM_181415.4	Atrnl1;Atrnl1;Atrnl1;Atrnl1;Atrnl1;Atrnl1	0;0;0;0;0;0	29	28	1	22	21	1	20	13	7	10	1	9	55	45	10
chr19	57609001	57610000	1000	*	7.41573e-05	0.021966	21.5968	Promoter (<=1kb)	19	57610963	57685588	74626	1	Atrnl1	XR_001782587.1	-963	XR_001782587.1;XM_006527052.2;XM_006527051.2;XM_006527049.2;XM_011247244.1;NM_181415.4	Atrnl1;Atrnl1;Atrnl1;Atrnl1;Atrnl1;Atrnl1	0;0;0;0;0;0	44	19	25	57	11	46	26	3	23	23	4	19	41	0	41
chr19	57621001	57622000	1000	*	0.000166089	0.0368536	-33.245	Intron (XR_001782587.1/Atrnl1, intron 1 of 10)	19	57611034	58133343	522310	1	Atrnl1	NM_181415.4	9967	XR_001782587.1;XM_006527052.2;XM_006527051.2;XM_006527049.2;XM_011247244.1;NM_181415.4	Atrnl1;Atrnl1;Atrnl1;Atrnl1;Atrnl1;Atrnl1	0;0;0;0;0;0	15	7	8	75	48	27	42	34	8	12	12	0	46	39	7
chr19	57994001	57995000	1000	*	1.7357e-05	0.00808805	-29.8789	Intron (XM_006527049.2/Atrnl1, intron 27 of 28)	19	58022571	58031893	9323	2	Gm32980	XR_001782644.1	36893	XM_006527049.2;XM_011247244.1;NM_181415.4;XM_006527053.1	Atrnl1;Atrnl1;Atrnl1;Atrnl1	0;0;0;0	39	11	28	32	8	24	27	12	15	28	14	14	44	33	11
chr19	58066001	58067000	1000	*	0.000231045	0.0449855	-28.6476	Intron (XM_006527049.2/Atrnl1, intron 28 of 28)	19	58051215	58051236	22	1	Mir5623	NA	14786	XM_006527049.2;XM_011247244.1;NM_181415.4;XM_006527053.1	Atrnl1;Atrnl1;Atrnl1;Atrnl1	0;0;0;0	35	23	12	58	32	26	55	37	18	10	10	0	39	39	0
chr19	58388001	58389000	1000	*	3.44089e-08	6.94684e-05	-29.7368	Intron (NM_010279.3/Gfra1, intron 5 of 10)	19	58235604	58454594	218991	2	Gfra1	NM_001285457.1	65594	NM_010279.3;NR_104342.1;NM_001285457.1;XM_006526683.3;XM_006526684.1;XM_006526682.1;XM_006526685.3;XM_006526681.1	Gfra1;Gfra1;Gfra1;Gfra1;Gfra1;Gfra1;Gfra1;Gfra1	0;0;0;0;0;0;0;0	38	23	15	20	16	4	29	29	0	10	10	0	20	20	0
chr19	58573001	58574000	1000	*	9.08914e-05	0.0251012	-27.272	Distal Intergenic	19	58606329	58629753	23425	1	1810007D17Rik	NR_038136.1	-32329	NA	NA	NA	5	4	1	23	10	13	38	31	7	22	21	1	20	18	2
chr19	59066001	59067000	1000	*	1.79007e-07	0.000247123	-38.6283	Intron (NM_001114312.1/Shtn1, intron 1 of 16)	19	58973358	59076069	102712	2	Shtn1	NM_001114312.1	9069	NM_001114312.1;NM_175172.4;XR_386512.3	Shtn1;Shtn1;Shtn1	0;0;0	32	15	17	52	34	18	31	30	1	16	14	2	11	11	0
chr19	59456001	59457000	1000	*	8.65057e-05	0.0242381	30.3571	Promoter (1-2kb)	19	59425104	59458635	33532	2	Emx2os	NR_002863.2	1635	XM_006526657.3;NM_010132.2;NR_002863.2	Emx2;Emx2;Emx2os	-1640;-1690;0	20	19	1	15	13	2	20	12	8	6	5	1	21	8	13
chr19	60469001	60470000	1000	*	3.78064e-06	0.00268702	44.3142	Promoter (<=1kb)	19	60465641	60469431	3791	2	Prlhr	XM_006527057.2	0	XM_006527057.2;NM_201615.2	Prlhr;Prlhr	0;-697	11	10	1	15	9	6	38	5	33	12	9	3	19	1	18
chr19	60860001	60861000	1000	*	1.21405e-07	0.000182289	-63.415	Promoter (<=1kb)	19	60837277	60861430	24154	2	Sfxn4	NM_053198.3	430	NM_007452.2;XM_006527498.3;XM_011247409.2;XM_006527499.3;NM_053198.3;XR_001782624.1;XR_386528.2;XR_386527.2	Prdx3;Sfxn4;Sfxn4;Sfxn4;Sfxn4;Sfxn4;Sfxn4;Sfxn4	13538;-2624;0;0;0;0;0;0	20	3	17	34	16	18	7	7	0	5	5	0	24	20	4
chr1	4613001	4614000	1000	*	1.51677e-06	0.00133166	62.5	Promoter (<=1kb)	1	4613389	4617805	4417	1	Gm29874	XR_001778815.1	0	XR_001778817.1;XR_001778816.1;XR_001778815.1;XR_001778819.1;XR_373196.2;Gm7369;XR_001778806.1;XR_001778812.1	Gm29874;Gm29874;Gm29874;Gm29874;Gm29874;Gm7369;LOC108167609;LOC108167609	4064;0;0;0;0;2757;-4220;-4220	12	11	1	7	7	0	12	0	12	5	0	5	6	6	0
chr1	6442001	6443000	1000	*	1.74416e-06	0.00148439	-20.8573	Distal Intergenic	1	6487231	6860940	373710	1	St18	NM_001244692.1	-44231	NA	NA	NA	63	43	20	77	59	18	68	58	10	47	46	1	61	59	2
chr1	7755001	7756000	1000	*	0.000228331	0.0446413	29.9495	Distal Intergenic	1	7664051	7665000	950	1	Rps2-ps2	Rps2-ps2	90950	NA	NA	NA	11	11	0	16	16	0	11	9	2	12	7	5	10	7	3
chr1	12643001	12644000	1000	*	3.37509e-05	0.0129264	-22.0701	Distal Intergenic	1	12667563	12673090	5528	1	Gm17644	NR_045297.1	-23563	NA	NA	NA	29	5	24	16	3	13	38	30	8	16	5	11	10	1	9
chr1	12837001	12838000	1000	*	2.51528e-07	0.000323301	51.5184	Intron (XM_006495510.3/Sulf1, intron 13 of 20)	1	12785448	12861192	75745	1	Sulf1	XM_006495514.1	51553	XM_006495510.3;XM_006495513.3;NM_001198565.1;NM_001198566.1;XM_006495511.3;XM_006495512.3;NM_172294.1;XM_006495514.1	Sulf1;Sulf1;Sulf1;Sulf1;Sulf1;Sulf1;Sulf1;Sulf1	0;0;0;0;0;0;0;0	22	21	1	44	43	1	23	15	8	6	3	3	5	1	4
chr1	12853001	12854000	1000	*	4.083e-05	0.0147454	-23.3232	Intron (XM_006495510.3/Sulf1, intron 20 of 20)	1	12785448	12861192	75745	1	Sulf1	XM_006495514.1	67553	XM_006495510.3;XM_006495513.3;NM_001198565.1;NM_001198566.1;XM_006495511.3;XM_006495512.3;NM_172294.1;XM_006495514.1	Sulf1;Sulf1;Sulf1;Sulf1;Sulf1;Sulf1;Sulf1;Sulf1	0;0;0;0;0;0;0;0	30	25	5	41	27	14	48	45	3	10	10	0	20	20	0
chr1	13105001	13106000	1000	*	0.000257835	0.0480848	-20.5584	Promoter (<=1kb)	1	13090688	13104959	14272	2	Gm39592	XR_865187.1	-42	XR_865187.1	Gm39592	-42	22	20	2	38	16	22	26	24	2	27	24	3	35	28	7
chr1	15041001	15042000	1000	*	3.5024e-05	0.0132616	48.6111	Distal Intergenic	1	15067032	15067558	527	1	Gm5048	Gm5048	-25032	NA	NA	NA	8	8	0	5	5	0	5	3	2	40	11	29	42	28	14
chr1	16530001	16531000	1000	*	0.000127622	0.0311426	29.7888	Distal Intergenic	1	16228803	16520182	291380	2	Stau2	XM_006495528.3	-9819	NA	NA	NA	17	17	0	13	12	1	17	12	5	17	14	3	26	12	14
chr1	16731001	16732000	1000	*	0.000179339	0.0386007	42.7778	Distal Intergenic	1	16688456	16709605	21150	1	Ly96	NM_016923.2	42545	NA	NA	NA	8	8	0	19	19	0	10	7	3	20	17	3	6	1	5
chr1	18408001	18409000	1000	*	1.25406e-11	7.93709e-08	-35.0221	Distal Intergenic	1	18260524	18265138	4615	2	Defb41	NM_001040027.2	-142863	NA	NA	NA	54	33	21	126	56	70	26	19	7	17	17	0	62	56	6
chr1	18458001	18459000	1000	*	1.8399e-05	0.00841575	38.7037	Distal Intergenic	1	18260524	18265138	4615	2	Defb41	NM_001040027.2	-192863	NA	NA	NA	10	10	0	12	12	0	8	4	4	9	8	1	20	9	11
chr1	21240001	21241000	1000	*	0.000178838	0.0385261	28.301	Promoter (<=1kb)	1	21240585	21265575	24991	1	Gsta3	NM_001077353.2	0	XR_373236.2;NM_001077353.2;NM_001288617.1;NM_010356.4	Gm28836;Gsta3;Gsta3;Gsta3	0;0;0;0	44	32	12	5	2	3	9	1	8	8	4	4	13	3	10
chr1	23922001	23923000	1000	*	1.48194e-10	7.02155e-07	46.1362	Promoter (<=1kb)	1	23845625	23922381	76757	2	Smap1	NM_028534.3	0	NM_028534.3;XM_006496362.1	Smap1;Smap1	0;0	40	31	9	70	35	35	10	0	10	141	33	108	231	68	163
chr1	23957001	23958000	1000	*	4.44386e-05	0.0156176	-21.3109	Distal Intergenic	1	23978191	23999887	21697	1	Gm26524	XR_865295.1	-20191	NA	NA	NA	67	50	17	26	16	10	39	35	4	67	58	9	123	113	10
chr1	24265001	24266000	1000	*	7.48041e-05	0.0220791	-20.3296	Exon (XM_006495645.3/Col19a1, exon 50 of 51)	1	24195203	24252738	57536	1	Col9a1	NM_001290691.1	69798	XM_006495645.3;NM_007733.2;XM_006495642.3;XM_006495643.3;XM_006495644.3;XM_006495646.3	Col19a1;Col19a1;Col19a1;Col19a1;Col19a1;Col19a1	0;0;0;0;0;0	64	22	42	146	54	92	72	46	26	68	39	29	109	51	58
chr1	24366001	24367000	1000	*	5.31246e-05	0.0175444	-41.7466	Intron (XM_006495645.3/Col19a1, intron 16 of 50)	1	24195203	24252738	57536	1	Col9a1	NM_001290691.1	170798	XM_006495645.3;NM_007733.2;XM_006495642.3;XM_006495643.3;XM_006495644.3;XM_006495646.3	Col19a1;Col19a1;Col19a1;Col19a1;Col19a1;Col19a1	0;0;0;0;0;0	11	3	8	47	32	15	66	54	12	96	83	13	18	18	0
chr1	24619001	24620000	1000	*	5.42008e-06	0.00346331	41.7308	Distal Intergenic	1	24593931	24595489	1559	2	Tubb4b-ps2	Tubb4b-ps2	-23512	NA	NA	NA	9	9	0	15	15	0	20	14	6	16	2	14	13	12	1
chr1	24633001	24634000	1000	*	5.2916e-07	0.000584707	30.8546	Distal Intergenic	1	24593931	24595489	1559	2	Tubb4b-ps2	Tubb4b-ps2	-37512	NA	NA	NA	28	16	12	12	3	9	10	2	8	30	1	29	41	3	38
chr1	25964001	25965000	1000	*	0.000256783	0.0479521	22.988	Distal Intergenic	1	25896970	25903608	6639	2	Gm31076	XR_373279.2	-60393	NA	NA	NA	16	16	0	16	16	0	19	16	3	7	6	1	18	11	7
chr1	26994001	26995000	1000	*	6.19604e-06	0.00383181	25.3693	Distal Intergenic	1	26681801	26687460	5660	2	4931408C20Rik	NM_001033764.3	-306541	NA	NA	NA	37	34	3	53	47	6	46	32	14	50	33	17	49	29	20
chr1	28272001	28273000	1000	*	2.65068e-05	0.0108857	-36.5971	Distal Intergenic	1	28580381	28580768	388	2	Gm7846	XR_373281.2	307768	NA	NA	NA	21	6	15	27	10	17	36	25	11	9	6	3	43	31	12
chr1	30127001	30128000	1000	*	0.000246048	0.0468306	-22.7142	Exon (XR_865309.1/Gm31465, exon 3 of 3)	1	30127597	30138442	10846	2	Gm31465	XR_865309.1	10442	XR_865307.2;XR_373282.3;XR_865308.2;XR_865309.1	Gm31465;Gm31465;Gm31465;Gm31465	0;0;0;0	25	21	4	19	13	6	15	15	0	17	17	0	31	30	1
chr1	30733001	30734000	1000	*	1.28843e-05	0.0064941	-32.4398	Intron (XR_865311.1/Gm39615, intron 1 of 3)	1	30482932	30755682	272751	2	Gm39615	XR_865311.1	21682	XR_865311.1;XR_865310.1	Gm39615;Gm39615	0;0	15	9	6	26	14	12	17	15	2	42	40	2	26	22	4
chr1	30928001	30929000	1000	*	7.73147e-05	0.0225342	27.7778	Distal Intergenic	1	30940303	30949332	9030	2	Ptp4a1	XM_006495799.2	20332	NA	NA	NA	5	5	0	15	15	0	15	11	4	44	22	22	15	14	1
chr1	31494001	31495000	1000	*	0.000106844	0.0278239	40.7536	Distal Intergenic	1	31615304	31616843	1540	1	Gm19680	Gm19680	-120304	NA	NA	NA	13	11	2	19	18	1	9	2	7	10	7	3	33	18	15
chr1	32599001	32600000	1000	*	0.000247939	0.0469582	-24.5515	Intron (XR_001783140.1/Khdrbs2, intron 6 of 14)	1	32543546	32547293	3748	2	Gm5415	NM_001164286.1	-51708	XR_001783140.1;XR_001783141.1;XR_373242.3;NM_133235.2	Khdrbs2;Khdrbs2;Khdrbs2;Khdrbs2	0;0;0;0	33	26	7	38	18	20	40	36	4	9	8	1	25	21	4
chr1	33101001	33102000	1000	*	7.36738e-05	0.0218747	-22.7994	Distal Intergenic	1	33133243	33176251	43009	2	Gm39616	XR_865316.2	74251	NA	NA	NA	22	3	19	28	10	18	6	2	4	10	4	6	55	38	17
chr1	33839001	33840000	1000	*	7.85639e-08	0.00013094	-34.2704	Promoter (<=1kb)	1	33835899	33838914	3016	2	Gm15455	NM_001161816.1	-87	NM_001161816.1	Gm15455	-87	65	25	40	70	12	58	43	30	13	11	6	5	21	13	8
chr1	33893001	33894000	1000	*	7.66532e-05	0.0223936	26.5759	Intron (NM_177235.3/Bend6, intron 1 of 6)	1	33852052	33907621	55570	2	Bend6	NM_177235.3	13621	NM_177235.3;NM_001310484.1;XM_017321224.1	Bend6;Bend6;Bend6	0;0;0	5	4	1	57	54	3	51	35	16	10	2	8	16	15	1
chr1	33944001	33945000	1000	*	2.21339e-06	0.00177585	-32.4997	Intron (XM_017314722.1/Dst, intron 2 of 101)	1	33908225	34308662	400438	1	Dst	NM_001276764.1	35776	XM_017314722.1;XM_017314676.1;XM_017314665.1;XM_006495666.3;XM_006495690.3;XM_006495691.3;XM_017314621.1;XM_017314635.1;XM_017314651.1;XM_017314687.1;XM_017314689.1;XM_017314706.1;XM_017314811.1;XM_017314794.1;XM_006495682.2;NM_001276764.1	Dst;Dst;Dst;Dst;Dst;Dst;Dst;Dst;Dst;Dst;Dst;Dst;Dst;Dst;Dst;Dst	0;0;0;0;0;0;0;0;0;0;0;0;0;0;0;0	79	18	61	19	11	8	9	9	0	21	7	14	27	23	4
chr1	34440001	34441000	1000	*	2.00676e-07	0.000270302	31.0372	Promoter (<=1kb)	1	34439829	34445747	5919	1	Imp4	NM_178601.3	172	NM_027159.2;NM_178601.3	Ccdc115;Imp4	-329;0	8	5	3	35	31	4	24	15	9	33	14	19	63	18	45
chr1	36513001	36514000	1000	*	0.000200446	0.0413792	-24.399	Promoter (1-2kb)	1	36511876	36528237	16362	1	Cnnm3	NM_053186.2	1125	XM_006496356.3;NM_001039551.1;NM_053186.2;NM_033570.2	Cnnm3;Cnnm3;Cnnm3;Cnnm4	0;0;0;41404	73	22	51	58	32	26	34	25	9	40	30	10	76	40	36
chr1	37570001	37571000	1000	*	9.47795e-05	0.0258255	-23.9168	Distal Intergenic	1	37444321	37541047	96727	2	Mgat4a	XM_017320961.1	-28954	NA	NA	NA	52	26	26	24	15	9	41	37	4	30	22	8	26	20	6
chr1	40115001	40116000	1000	*	0.000192783	0.0403787	-23.2218	Exon (XM_017317722.1/Il1r2, exon 6 of 10)	1	40107055	40125230	18176	1	Il1r2	XM_006495726.2	7946	XM_017317722.1;XM_011238437.2;NM_010555.4;XM_006495725.3;XM_011238439.2;XM_011238438.2;XM_011238440.2;XM_006495726.2	Il1r2;Il1r2;Il1r2;Il1r2;Il1r2;Il1r2;Il1r2;Il1r2	0;0;0;0;0;0;0;0	17	10	7	41	20	21	56	47	9	10	7	3	35	27	8
chr1	40805001	40806000	1000	*	4.18856e-10	1.70266e-06	-44.1907	Promoter (<=1kb)	1	40805573	40856887	51315	1	Tmem182	XM_017321461.1	0	XM_017321461.1;NM_001081198.1;XM_006496124.1	Tmem182;Tmem182;Tmem182	0;0;0	51	31	20	82	26	56	16	14	2	15	14	1	21	19	2
chr1	40879001	40880000	1000	*	0.000175342	0.0380705	-37.2955	Distal Intergenic	1	40805812	40856887	51076	1	Tmem182	XM_006496124.1	73189	NA	NA	NA	26	9	17	21	11	10	21	15	6	10	9	1	21	17	4
chr1	40888001	40889000	1000	*	3.20629e-05	0.0124856	-30.4613	Distal Intergenic	1	40805812	40856887	51076	1	Tmem182	XM_006496124.1	82189	NA	NA	NA	10	0	10	60	14	46	75	41	34	11	3	8	135	60	75
chr1	40889001	40890000	1000	*	0.000253993	0.0476356	-37.8474	Distal Intergenic	1	40805812	40856887	51076	1	Tmem182	XM_006496124.1	83189	NA	NA	NA	12	0	12	5	2	3	30	20	10	53	27	26	59	33	26
chr1	41194001	41195000	1000	*	2.08454e-08	4.71615e-05	-37.6201	Distal Intergenic	1	41167560	41181252	13693	2	4930448I06Rik	NR_040475.1	-12749	NA	NA	NA	34	7	27	83	20	63	27	13	14	5	3	2	46	33	13
chr1	42371001	42372000	1000	*	1.57392e-05	0.00752352	-26.6667	Distal Intergenic	1	42331816	42350940	19125	2	LOC108167620	XR_001778901.1	-20061	NA	NA	NA	15	10	5	5	4	1	29	29	0	9	9	0	25	25	0
chr1	42427001	42428000	1000	*	1.3974e-05	0.00688713	-28.1431	Promoter (<=1kb)	1	42399266	42427644	28379	2	Gm36678	XR_373375.1	0	XR_373375.1	Gm36678	0	7	7	0	47	12	35	5	5	0	7	7	0	11	8	3
chr1	42486001	42487000	1000	*	2.87845e-05	0.0115461	27.5801	Distal Intergenic	1	42399266	42427644	28379	2	Gm36678	XR_373375.1	-58357	NA	NA	NA	53	48	5	99	95	4	18	4	14	41	38	3	56	46	10
chr1	42790001	42791000	1000	*	5.81919e-08	0.000103855	-52.6107	Distal Intergenic	1	42762307	42774147	11841	1	LOC108167623	XR_001778912.1	27694	NA	NA	NA	26	17	9	22	5	17	10	9	1	11	11	0	14	14	0
chr1	42852001	42853000	1000	*	8.26902e-08	0.000136228	37.8789	Promoter (<=1kb)	1	42851238	42898295	47058	1	Mrps9	XM_006496257.3	763	NM_023514.4;XM_006496257.3	Mrps9;Mrps9	0;0	37	17	20	32	27	5	77	15	62	23	5	18	32	13	19
chr1	43358001	43359000	1000	*	0.000201459	0.0415022	20.0504	Distal Intergenic	1	43249810	43309641	59832	2	Gm29040	XR_865401.1	-48360	NA	NA	NA	48	43	5	29	29	0	43	31	12	55	45	10	64	45	19
chr1	43554001	43555000	1000	*	2.81859e-08	5.93387e-05	46.2804	Exon (NM_010879.3/Nck2, exon 4 of 5)	1	43445751	43570518	124768	1	Nck2	NM_010879.3	108250	NM_010879.3	Nck2	0	16	16	0	28	26	2	90	55	35	30	10	20	25	14	11
chr1	44166001	44167000	1000	*	4.08048e-05	0.0147416	-24.8006	Exon (XM_006495890.2/Ercc5, exon 8 of 15)	1	44147744	44181260	33517	1	Ercc5	NM_011729.2	18257	XM_006495890.2;XM_017319870.1;XM_017319871.1;NM_011729.2	Ercc5;Ercc5;Ercc5;Ercc5	0;0;0;0	57	19	38	22	16	6	22	16	6	19	15	4	22	18	4
chr1	44277001	44278000	1000	*	9.86771e-05	0.0263623	35.1515	Distal Intergenic	1	44204070	44218931	14862	2	Mettl21e	NM_207281.3	-58070	NA	NA	NA	19	19	0	6	6	0	10	7	3	11	6	5	10	7	3
chr1	45314001	45315000	1000	*	4.82909e-06	0.00318752	55	Promoter (2-3kb)	1	45311538	45349706	38169	1	Col3a1	NM_009930.2	2463	NM_009930.2	Col3a1	0	12	10	2	14	14	0	5	5	0	5	0	5	10	1	9
chr1	46234001	46235000	1000	*	0.000124941	0.0306754	-21.9469	Promoter (<=1kb)	1	46222608	46233437	10830	2	Gm31046	XR_865413.1	-564	XM_011238490.2;XM_011238488.2;XM_006495929.3;XM_006495930.3;XM_006495931.3;XM_006495928.3;XM_011238495.2;XM_017320267.1;XM_011238494.2;XM_006495925.3;XR_373250.3;XM_006495915.3;XM_006495912.3;XM_006495913.3;XM_006495914.3;XM_011238487.2;XM_011238491.2;XM_006495916.3;NM_001160386.1;XM_006495918.3;XM_006495922.3;XM_006495919.1;XM_006495920.2;XM_006495921.1;XM_011238492.2;XM_006495923.1;XM_011238493…	Dnah7b;Dnah7b;Dnah7b;Dnah7b;Dnah7b;Dnah7b;Dnah7b;Dnah7b;Dnah7b;Dnah7b;Dnah7b;Dnah7b;Dnah7b;Dnah7b;Dnah7b;Dnah7b;Dnah7b;Dnah7b;Dnah7b;Dnah7b;Dnah7b;Dnah7b;Dnah7b;Dnah7b;Dnah7b;Dnah7b;Dnah7b;Dnah7b;Dnah7b;Gm31046;Gm31046	0;0;167576;167576;0;0;0;0;0;0;0;0;0;0;0;0;0;0;0;0;0;0;0;0;0;0;0;0;0;-564;-564	60	31	29	75	55	20	28	20	8	27	24	3	43	40	3
chr1	46594001	46595000	1000	*	3.81051e-06	0.00270441	-50.1984	Exon (XM_011238631.2/Dnah7c, exon 20 of 66)	1	46629540	46807477	177938	1	Dnah7c	XM_006496387.3	-34540	XM_011238631.2;NM_001310335.1	Dnah7c;Dnah7c	0;0	21	4	17	15	10	5	12	11	1	8	7	1	7	7	0
chr1	47193001	47194000	1000	*	0.000168596	0.037193	-25.6653	Distal Intergenic	1	47251863	47288100	36238	1	Gm39638	XR_865414.2	-57863	NA	NA	NA	17	13	4	28	17	11	34	33	1	21	18	3	11	11	0
chr1	49019001	49020000	1000	*	8.31846e-05	0.0236052	-25.1115	Distal Intergenic	1	49003981	49004831	851	2	Gm19644	Gm19644	-14170	NA	NA	NA	35	23	12	61	38	23	32	28	4	20	19	1	33	28	5
chr1	51425001	51426000	1000	*	2.09552e-05	0.00925033	-29.6825	Distal Intergenic	1	51469488	51478399	8912	2	Nabp1	NM_001310548.1	52399	NA	NA	NA	45	35	10	50	25	25	14	13	1	14	13	1	20	19	1
chr1	52752001	52753000	1000	*	1.9611e-05	0.00880206	20.9719	Distal Intergenic	1	52656299	52727462	71164	2	Mfsd6	XR_001778735.1	-24539	NA	NA	NA	50	45	5	43	42	1	56	38	18	49	35	14	58	46	12
chr1	53351001	53352000	1000	*	0.000208962	0.0423389	-29.7045	Promoter (<=1kb)	1	53344617	53352752	8136	2	Asnsd1	NM_001290984.1	752	NM_001290984.1;NM_133728.3	Asnsd1;Asnsd1	0;0	46	29	17	49	11	38	36	28	8	10	8	2	47	28	19
chr1	53748001	53749000	1000	*	0.000236836	0.0457301	-57.7083	Intron (XR_373404.2/Gm32311, intron 3 of 3)	1	53755512	53785164	29653	2	Stk17b	XM_006496359.3	36164	XR_373404.2;XR_373405.2	Gm32311;Gm32311	0;0	16	13	3	5	0	5	6	6	0	20	19	1	13	13	0
chr1	54556001	54557000	1000	*	0.000152418	0.0348465	38.4737	Promoter (<=1kb)	1	54473000	54557684	84685	2	Pgap1	NM_001163314.2	684	NM_001163314.2	Pgap1	0	13	10	3	56	14	42	49	0	49	47	13	34	51	5	46
chr1	55407001	55408000	1000	*	1.39297e-06	0.00124818	32.1942	Promoter (1-2kb)	1	55404264	55405956	1693	2	LOC108167625	XR_001778928.1	-1045	XR_001778928.1;NM_001114663.1	LOC108167625;Plcl1	-1045;0	28	14	14	40	16	24	45	0	45	55	14	41	54	7	47
chr1	57503001	57504000	1000	*	1.41535e-07	0.00020572	-54.1737	Distal Intergenic	1	57388244	57406674	18431	2	Tyw5	NM_001302964.1	-96327	NA	NA	NA	5	3	2	14	1	13	17	15	2	12	11	1	24	20	4
chr1	58994001	58995000	1000	*	6.91935e-07	0.00073066	20.0757	3' UTR	1	58973571	58995122	21552	1	Stradb	NM_172656.5	20430	XM_006496390.3;XM_011238634.2;XM_011238635.2;XM_011238636.2;XM_017313438.1;XR_373251.2;NM_172656.5	Als2cr11b;Als2cr11b;Als2cr11b;Als2cr11b;Als2cr11b;Stradb;Stradb	0;0;0;0;0;0;0	67	65	2	109	108	1	21	13	8	51	46	5	33	27	6
chr1	59542001	59543000	1000	*	2.43744e-06	0.00191395	-29.7186	Promoter (<=1kb)	1	59542981	59636417	93437	1	Gm973	XM_017321351.1	0	XR_373435.2;XR_373432.3;XR_865456.1;NM_001013771.2;XM_017321324.1;XM_017321326.1;XM_017321327.1;XM_017321333.1;XM_017321334.1;XM_017321344.1;XM_006496100.2;XM_017321335.1;XM_017321342.1;XM_017321345.1;XM_017321337.1;XM_017321340.1;XM_017321347.1;XM_017321351.1;XM_017321352.1;XM_017321355.1	Gm28411;Gm28411;Gm39649;Gm973;Gm973;Gm973;Gm973;Gm973;Gm973;Gm973;Gm973;Gm973;Gm973;Gm973;Gm973;Gm973;Gm973;Gm973;Gm973;Gm973	0;0;-4780;0;0;0;0;0;0;0;0;0;0;0;0;0;0;0;0;0	57	14	43	69	32	37	78	43	35	46	37	9	110	66	44
chr1	59606001	59607000	1000	*	1.30601e-10	6.27891e-07	-47.7765	Promoter (<=1kb)	1	59605704	59636417	30714	1	Gm973	XM_006496110.3	297	NM_001013771.2;XM_017321324.1;XM_017321326.1;XM_017321327.1;XM_017321333.1;XM_017321334.1;XM_017321344.1;XM_006496100.2;XM_017321335.1;XM_017321342.1;XM_017321345.1;XM_017321337.1;XM_017321340.1;XM_017321347.1;XM_017321351.1;XM_017321352.1;XM_017321355.1;XM_006496108.1;XM_017321350.1;XM_006496107.1;XM_006496109.3;XM_006496110.3	Gm973;Gm973;Gm973;Gm973;Gm973;Gm973;Gm973;Gm973;Gm973;Gm973;Gm973;Gm973;Gm973;Gm973;Gm973;Gm973;Gm973;Gm973;Gm973;Gm973;Gm973;Gm973	0;0;0;0;0;0;0;0;0;0;0;0;0;0;0;0;0;0;0;0;0;0	60	7	53	101	56	45	17	13	4	21	20	1	83	60	23
chr1	61376001	61377000	1000	*	4.26139e-05	0.0151705	-29.9747	Promoter (1-2kb)	1	61378432	61395904	17473	1	9530026F06Rik	NR_040483.1	-1432	NR_040483.1	9530026F06Rik	-1432	11	3	8	27	6	21	30	26	4	5	2	3	16	6	10
chr1	61427001	61428000	1000	*	0.000201138	0.0414633	-21.508	Distal Intergenic	1	61378432	61395904	17473	1	9530026F06Rik	NR_040483.1	48569	NA	NA	NA	31	22	9	42	24	18	22	18	4	5	4	1	39	37	2
chr1	61640001	61641000	1000	*	7.39868e-06	0.00432418	-45.7274	Promoter (1-2kb)	1	61638824	62642284	1003461	1	Pard3b	NM_001081050.2	1177	XM_011238602.2;XM_006496298.3;NM_001081050.2	Pard3b;Pard3b;Pard3b	0;0;0	32	18	14	21	6	15	12	10	2	10	10	0	37	30	7
chr1	62445001	62446000	1000	*	1.23703e-06	0.00114087	37.9681	Intron (XM_006496298.3/Pard3b, intron 20 of 23)	1	62513330	62526071	12742	2	Gm34881	XR_373442.3	80071	XM_006496298.3;NM_001081050.2;XM_006496299.3	Pard3b;Pard3b;Pard3b	0;0;0	26	23	3	30	29	1	22	10	12	20	12	8	12	7	5
chr1	62900001	62901000	1000	*	0.000114474	0.0290255	-21.4491	Distal Intergenic	1	62906176	62956594	50419	2	Gm35252	XR_373451.2	55594	NA	NA	NA	33	29	4	35	23	12	19	18	1	22	22	0	15	15	0
chr1	63267001	63268000	1000	*	1.83876e-05	0.00841575	21.5719	Exon (XR_373454.2/Gm11608, exon 3 of 3)	1	63266677	63272807	6131	2	Gm11608	XR_373454.2	4807	XR_373454.2;XR_373455.3;XR_373456.3;XR_373457.3;XR_865482.1;NM_001285936.1;NM_001285937.1	Gm11608;Gm11608;Gm11608;Gm11608;Gm11608;Zdbf2;Zdbf2	0;0;0;0;0;0;0	42	35	7	46	40	6	85	45	40	27	21	6	25	15	10
chr1	63988001	63989000	1000	*	7.89486e-06	0.00454696	-21.5564	Distal Intergenic	1	63964727	63968999	4273	1	Gm13749	NR_027824.1	23274	NA	NA	NA	37	28	9	47	29	18	42	41	1	55	52	3	28	22	6
chr1	64531001	64532000	1000	*	0.000123204	0.0303908	26.5879	Promoter (<=1kb)	1	64532315	64602970	70656	1	Creb1	XM_006495653.3	-315	XM_006495653.3;XM_006495654.3;XM_006495650.3;XM_017314080.1;XM_006495652.3;XM_006495651.3;XM_017314099.1;XM_011238424.2;NM_001037726.1;NM_009952.2;NM_133828.2	Creb1;Creb1;Creb1;Creb1;Creb1;Creb1;Creb1;Creb1;Creb1;Creb1;Creb1	-315;-316;-654;-654;-655;-657;-660;-671;-804;-804;-804	34	19	15	54	23	31	43	11	32	25	6	19	49	9	40
chr1	65046001	65047000	1000	*	7.91046e-05	0.022856	26.1183	Downstream (1-2kb)	1	65048557	65051163	2607	2	Cryge	NM_007777.3	4163	NM_007777.3	Cryge	4163	35	33	2	22	19	3	20	13	7	5	4	1	21	10	11
chr1	65892001	65893000	1000	*	0.000208027	0.0422733	-26.4201	Distal Intergenic	1	65926522	65928304	1783	1	Crygf	NM_027010.2	-33522	NA	NA	NA	51	31	20	22	12	10	23	20	3	29	24	5	63	52	11
chr1	69131001	69132000	1000	*	1.50182e-05	0.00728287	-26.8572	Promoter (<=1kb)	1	69130834	69131318	485	2	Gm8840	Gm8840	0	Gm8840	Gm8840	0	71	36	35	54	27	27	28	21	7	42	34	8	37	28	9
chr1	69222001	69223000	1000	*	7.43332e-06	0.00433683	-37.0494	Distal Intergenic	1	69130834	69131318	485	2	Gm8840	Gm8840	-90683	NA	NA	NA	15	2	13	25	2	23	44	22	22	27	13	14	20	9	11
chr1	69951001	69952000	1000	*	1.31543e-05	0.00656401	27.0087	Promoter (<=1kb)	1	69951615	70725132	773518	1	Spag16	NM_025728.4	0	NM_029160.3;NM_025728.4	Spag16;Spag16	0;0	84	44	40	63	34	29	53	7	46	74	12	62	108	53	55
chr1	70478001	70479000	1000	*	0.000207239	0.0422179	-24.3358	Intron (NM_029160.3/Spag16, intron 15 of 16)	1	70725221	70773396	48176	1	Vwc2l	XM_006496064.2	-246221	NM_029160.3;NM_025728.4	Spag16;Spag16	0;0	43	12	31	82	29	53	22	22	0	5	1	4	96	46	50
chr1	71326001	71327000	1000	*	4.74035e-05	0.0162955	30.8001	Promoter (<=1kb)	1	71327290	71329244	1955	1	Gm39659	XR_865506.1	-290	NM_175210.3;XR_865506.1	Abca12;Gm39659	0;-290	34	26	8	40	38	2	23	12	11	10	6	4	19	10	9
chr1	72051001	72052000	1000	*	2.70865e-05	0.0110602	-46.8441	Distal Intergenic	1	71958998	72005195	46198	2	4933417E11Rik	NR_040454.1	-45806	NA	NA	NA	10	3	7	25	4	21	19	13	6	5	4	1	18	11	7
chr1	72640001	72641000	1000	*	4.33243e-05	0.0153578	33.7157	Promoter (<=1kb)	1	72640226	72642976	2751	1	Gm39662	XR_001778970.1	0	NM_176980.4;XM_006496059.3;XM_017321180.1;XM_006496060.2;XR_001778970.1;XR_865526.2;XR_865527.2;XM_006496141.3;XM_006496143.3;NM_018817.2;XM_006496142.3;XM_006496144.1;XM_006496145.3	Ankar;Ankar;Ankar;Ankar;Gm39662;Gm39662;Gm39662;Smarcal1;Smarcal1;Smarcal1;Smarcal1;Smarcal1;Smarcal1	59564;59539;40972;59564;0;0;0;103310;102931;56750;56513;54790;52938	39	20	19	26	14	12	38	2	36	25	0	25	39	20	19
chr1	74825001	74826000	1000	*	0.000120572	0.0299484	-38.99	Exon (XR_373533.2/Gm32275, exon 2 of 3)	1	74816747	74816817	71	2	n-TGgcc3	rna2254	-8184	XR_373533.2	Gm32275	0	29	10	19	37	8	29	22	12	10	9	8	1	26	15	11
chr1	75210001	75211000	1000	*	8.45849e-05	0.023878	-29.697	Promoter (<=1kb)	1	75197534	75210754	13221	2	Glb1l	XM_006496553.3	0	XM_006496553.3;XM_006496555.3;XM_011238713.2;XM_017312537.1;XM_006496554.3;NM_029010.1;XR_373546.2;XR_001778395.1;XR_001778396.1;XM_017312546.1;XR_373547.2;NM_001277992.1;NM_011494.5;NR_102731.1;XM_006496461.1;XM_006496462.1;NM_001313723.1;NM_001313724.1;NM_009447.4;XM_006496478.1	Glb1l;Glb1l;Glb1l;Glb1l;Glb1l;Glb1l;Glb1l;Glb1l;Glb1l;Glb1l;Glb1l;Stk16;Stk16;Stk16;Stk16;Stk16;Tuba4a;Tuba4a;Tuba4a;Tuba4a	0;0;0;0;0;0;0;0;0;0;0;0;0;0;0;0;8294;8294;8294;8860	12	0	12	56	0	56	5	0	5	11	1	10	5	4	1
chr1	80409001	80410000	1000	*	0.00011312	0.0288866	29.5111	Distal Intergenic	1	80428170	80434241	6072	1	Gm38673	XR_865574.1	-18170	NA	NA	NA	6	5	1	53	52	1	5	1	4	5	5	0	11	7	4
chr1	80813001	80814000	1000	*	9.90776e-05	0.026421	26.1432	Distal Intergenic	1	80512569	80758706	246138	2	Dock10	XR_373539.3	-54295	NA	NA	NA	19	19	0	40	36	4	15	10	5	16	15	1	26	12	14
chr1	83064001	83065000	1000	*	2.535e-05	0.0105449	47.4657	Distal Intergenic	1	83060930	83061921	992	1	Krtap28-13	NM_027778.2	3071	NM_027778.2	Krtap28-13	3071	11	11	0	16	14	2	31	21	10	5	3	2	18	2	16
chr1	83159001	83160000	1000	*	3.73407e-08	7.39419e-05	56.1959	Promoter (<=1kb)	1	83159742	83186627	26886	1	Daw1	XM_006496550.3	0	XM_006496550.3;XM_006496547.2;XM_006496548.2;XM_006496549.2;XR_373545.2;NM_027725.3;NR_027636.1;XM_011238710.2;XM_011238711.2	Daw1;Daw1;Daw1;Daw1;Daw1;Daw1;Daw1;Daw1;Daw1	0;0;0;0;0;0;0;-2007;-2011	17	13	4	25	16	9	28	6	22	5	0	5	58	12	46
chr1	83284001	83285000	1000	*	2.08254e-05	0.00920256	-35.7895	Intron (XM_006496576.3/Sphkap, intron 6 of 12)	1	83314450	83316222	1773	1	Gm6374	Gm6374	-29450	XM_006496576.3;XM_006496578.3;XM_006496575.3;XM_006496577.3;NM_172430.3	Sphkap;Sphkap;Sphkap;Sphkap;Sphkap	0;0;0;0;0	10	6	4	19	13	6	11	11	0	11	11	0	13	13	0
chr1	84933001	84934000	1000	*	0.00010567	0.02759	29.3016	Promoter (1-2kb)	1	84906705	84935083	28379	2	Slc16a14	NM_027921.1	1083	XR_865590.1;XM_006496551.3;NM_027921.1	Gm39669;Slc16a14;Slc16a14	-1272;0;0	5	4	1	25	21	4	40	16	24	5	4	1	21	8	13
chr1	85110001	85111000	1000	*	0.00023926	0.0460072	24.8614	Promoter (<=1kb)	1	85094157	85110502	16346	2	A530032D15Rik	XM_006496502.3	0	NM_213615.2;XM_006496502.3;XR_001778792.1;XM_006496590.1	A530032D15Rik;A530032D15Rik;A530040E14Rik;Gm35498	-148;0;0;7523	38	27	11	57	40	17	59	21	38	41	15	26	63	41	22
chr1	86237001	86238000	1000	*	9.09319e-06	0.00507999	-20.3497	Intron (XM_006529960.3/Armc9, intron 19 of 20)	1	86245335	86256796	11462	2	LOC108167633	XR_001779053.1	18796	XM_006529960.3;XR_387202.3;XM_006529959.3;XM_006529952.3;XM_006529953.3;XM_006529954.2;XM_006529956.3;XM_006529957.3;XM_006529958.3;XR_001778466.1;XR_387199.3;XR_387200.3;NM_027456.2;NM_001310702.1;NM_030184.2	Armc9;Armc9;Armc9;Armc9;Armc9;Armc9;Armc9;Armc9;Armc9;Armc9;Armc9;Armc9;Armc9;Armc9;Armc9	0;0;0;0;0;0;0;0;0;0;0;0;0;0;0	28	17	11	13	12	1	35	33	2	27	26	1	42	42	0
chr1	87317001	87318000	1000	*	0.000177351	0.0383056	20	Distal Intergenic	1	87293832	87309496	15665	2	Gm41911	XR_878348.1	-7505	NA	NA	NA	32	32	0	26	26	0	6	4	2	20	18	2	36	30	6
chr1	88400001	88401000	1000	*	1.07225e-12	8.26447e-09	45.0479	Distal Intergenic	1	88406966	88428300	21335	1	Spp2	XM_006529918.3	-5966	NA	NA	NA	5	5	0	23	23	0	93	25	68	11	11	0	79	30	49
chr1	89087001	89088000	1000	*	0.000243597	0.046493	-28.5106	Intron (NM_133816.2/Sh3bp4, intron 1 of 5)	1	89102255	89103770	1516	2	Gm34331	XR_387243.3	15770	NM_133816.2	Sh3bp4	0	5	3	2	47	39	8	21	21	0	12	12	0	12	12	0
chr1	90889001	90890000	1000	*	5.61538e-05	0.0181786	-34.3352	Intron (XR_387263.2/Gm35381, intron 5 of 5)	1	90887867	90909237	21371	2	Gm35381	XR_387263.2	19237	XR_387263.2	Gm35381	0	11	4	7	49	40	9	15	12	3	45	45	0	21	21	0
chr1	92179001	92180000	1000	*	9.50697e-08	0.000150189	37.2266	Promoter (<=1kb)	1	91928779	92180231	251453	2	Hdac4	XM_006529312.1	231	XM_006529312.1;XM_006529313.1;XM_006529315.2;XM_017319482.1;XM_017319501.1;XM_017319476.1;XM_017319477.1;XM_017319478.1;XM_017319479.1;NM_207225.2;XM_017319480.1;XM_017319486.1;XM_017319488.1;XM_017319498.1;XM_017319487.1	Hdac4;Hdac4;Hdac4;Hdac4;Hdac4;Hdac4;Hdac4;Hdac4;Hdac4;Hdac4;Hdac4;Hdac4;Hdac4;Hdac4;Hdac4	0;0;0;0;0;0;0;0;0;0;0;0;0;0;0	243	127	116	208	113	95	81	2	79	10	0	10	258	118	140
chr1	94079001	94080000	1000	*	9.3165e-05	0.02556	35.4155	Distal Intergenic	1	94038305	94052553	14249	2	Pdcd1	NM_008798.2	-26448	NA	NA	NA	5	5	0	13	11	2	19	8	11	5	5	0	35	10	25
chr1	94585001	94586000	1000	*	9.93633e-05	0.0264545	24.8485	Distal Intergenic	1	94468754	94469937	1184	2	Gm7895	Gm7895	-115064	NA	NA	NA	30	29	1	11	11	0	44	28	16	33	27	6	28	21	7
chr1	94738001	94739000	1000	*	0.000228151	0.0446308	-21.3333	Distal Intergenic	1	94797442	94802472	5031	1	4930440C22Rik	NR_040473.1	-58442	NA	NA	NA	25	21	4	15	11	4	6	6	0	17	17	0	25	25	0
chr1	94960001	94961000	1000	*	8.33241e-05	0.0236313	22.7075	Distal Intergenic	1	94797442	94802472	5031	1	4930440C22Rik	NR_040473.1	162559	NA	NA	NA	78	67	11	79	66	13	31	22	9	30	13	17	46	33	13
chr1	98029001	98030000	1000	*	1.0355e-05	0.00554936	-20.1879	Intron (XM_017319280.1/Pam, intron 2 of 26)	1	98031123	98047793	16671	2	B230216N24Rik	NR_037993.1	17793	NR_037993.1;XM_017319280.1;XM_011247939.2;XM_017319290.1;XM_006529243.3;XM_006529244.3;XM_011247937.2;XM_011247938.2;XM_017319284.1;XM_017319286.1;XM_017319289.1;NM_013626.3	B230216N24Rik;Pam;Pam;Pam;Pam;Pam;Pam;Pam;Pam;Pam;Pam;Pam	17793;0;0;0;0;0;0;0;0;0;0;0	85	61	24	28	21	7	43	41	2	38	36	2	32	29	3
chr1	101730001	101731000	1000	*	0.000247438	0.0469077	-28.541	Distal Intergenic	1	101385850	101386663	814	1	Psmb6-ps2	Psmb6-ps2	344151	NA	NA	NA	23	6	17	19	8	11	47	32	15	23	11	12	50	36	14
chr1	102993001	102994000	1000	*	6.29987e-05	0.0196932	22.783	Distal Intergenic	1	102458654	102458922	269	2	LOC102634495	LOC102634495	-534079	NA	NA	NA	57	46	11	58	42	16	54	24	30	23	12	11	17	11	6
chr1	103246001	103247000	1000	*	0.000244485	0.0466218	-35.3707	Distal Intergenic	1	102458654	102458922	269	2	LOC102634495	LOC102634495	-787079	NA	NA	NA	11	4	7	16	5	11	21	18	3	5	2	3	11	9	2
chr1	103384001	103385000	1000	*	0.000137173	0.0326125	-22.381	Distal Intergenic	1	102458654	102458922	269	2	LOC102634495	LOC102634495	-925079	NA	NA	NA	45	26	19	49	14	35	10	8	2	6	2	4	30	25	5
chr1	103560001	103561000	1000	*	2.31698e-05	0.00988473	-23.479	Distal Intergenic	1	104304699	104322994	18296	2	Gm41924	XR_878424.1	761994	NA	NA	NA	48	30	18	60	41	19	42	37	5	37	32	5	38	35	3
chr1	103607001	103608000	1000	*	0.000265838	0.0489844	22.79	Distal Intergenic	1	104304699	104322994	18296	2	Gm41924	XR_878424.1	714994	NA	NA	NA	27	24	3	31	30	1	27	21	6	20	13	7	49	33	16
chr1	104768001	104769000	1000	*	1.57498e-05	0.00752498	-28.5332	Promoter (<=1kb)	1	104768819	104995481	226663	1	Cdh20	NM_011800.4	0	NM_011800.4	Cdh20	0	33	1	32	46	2	44	10	3	7	6	1	5	14	7	7
chr1	104993001	104994000	1000	*	0.00027414	0.0498347	43.4386	Exon (NM_011800.4/Cdh20, exon 12 of 12)	1	105116286	105127780	11495	1	Gm29012	XR_387294.2	-122286	NM_011800.4	Cdh20	0	6	6	0	33	23	10	58	23	35	40	10	30	47	28	19
chr1	106074001	106075000	1000	*	5.31774e-06	0.00341318	-40.4059	Promoter (<=1kb)	1	106073189	106091455	18267	1	Gm26509	XR_878431.1	812	XR_878431.1	Gm26509	0	38	21	17	33	19	14	21	19	2	12	12	0	5	5	0
chr1	106795001	106796000	1000	*	3.43403e-06	0.00249929	30.5531	Promoter (<=1kb)	1	106770788	106796725	25938	2	Vps4b	NM_009190.2	725	NM_009190.2	Vps4b	0	37	27	10	21	20	1	29	24	5	60	25	35	69	25	44
chr1	108816001	108817000	1000	*	1.05308e-05	0.00562846	-33.3205	Distal Intergenic	1	108997570	108998849	1280	2	Gm17847	Gm17847	181849	NA	NA	NA	13	5	8	56	25	31	42	30	12	26	17	9	41	36	5
chr1	109199001	109200000	1000	*	0.000149796	0.034587	25.417	Distal Intergenic	1	108997570	108998849	1280	2	Gm17847	Gm17847	-200152	NA	NA	NA	64	52	12	64	54	10	14	8	6	32	13	19	43	32	11
chr1	109591001	109592000	1000	*	0.000229374	0.0447384	-25.9359	Distal Intergenic	1	109832944	109834896	1953	1	Gm8141	Gm8141	-240944	NA	NA	NA	37	14	23	36	14	22	59	40	19	13	6	7	19	15	4
chr1	111795001	111796000	1000	*	9.09232e-05	0.025103	-48.0769	Distal Intergenic	1	111804770	111807826	3057	2	Gm8173	Gm8173	11826	NA	NA	NA	13	7	6	6	3	3	7	7	0	7	7	0	5	5	0
chr1	111865001	111866000	1000	*	2.96871e-06	0.00224732	44.7297	Promoter (<=1kb)	1	111858701	111864969	6269	2	Dsel	XM_017321184.1	-32	XM_017321183.1;XM_017321184.1;NM_001081316.1	Dsel;Dsel;Dsel	-32;-32;-83	20	14	6	12	4	8	37	4	33	5	0	5	10	1	9
chr1	113963001	113964000	1000	*	2.68313e-08	5.75001e-05	-51.6587	Intron (XR_878443.1/Gm41933, intron 2 of 2)	1	113942790	113969982	27193	1	Gm41933	XR_878443.1	20211	XR_878443.1	Gm41933	0	6	3	3	38	3	35	15	9	6	6	6	0	11	9	2
chr1	117440001	117441000	1000	*	0.0001741	0.0378973	-23.5582	Distal Intergenic	1	117726867	117727955	1089	1	LOC108167601	XM_017313131.1	-285867	NA	NA	NA	121	76	45	102	68	34	28	28	0	41	39	2	86	60	26
chr1	119047001	119048000	1000	*	1.96511e-05	0.00881188	-34.4529	Intron (NM_001081125.1/Gli2, intron 1 of 13)	1	118834061	119053619	219559	2	Gli2	NM_001081125.1	5619	NM_001081125.1	Gli2	0	32	4	28	58	26	32	76	29	47	27	19	8	73	59	14
chr1	119912001	119913000	1000	*	0.000229537	0.0447474	-33.2864	Promoter (<=1kb)	1	119907890	119913168	5279	2	Tmem177	NM_175106.3	168	XR_001779366.1;XR_001779365.1;NM_175106.3	Gm28209;Gm28209;Tmem177	0;-365;0	15	0	15	44	5	39	84	31	53	5	4	1	19	0	19
chr1	124800001	124801000	1000	*	2.79685e-07	0.000352693	-35.0112	Intron (XM_006529626.3/Dpp10, intron 1 of 25)	1	123332138	124846034	1513897	2	Dpp10	XM_006529626.3	45034	XM_006529626.3	Dpp10	0	62	14	48	43	34	9	14	12	2	12	10	2	26	23	3
chr1	128446001	128447000	1000	*	5.79024e-05	0.0185214	-28.023	Distal Intergenic	1	128412118	128417416	5299	2	Dars	NM_145507.2	-28585	NA	NA	NA	29	17	12	5	4	1	25	23	2	7	7	0	16	16	0
chr1	128731001	128732000	1000	*	0.000104794	0.0274329	27.3333	Distal Intergenic	1	128588199	128592311	4113	2	Cxcr4	XM_006529113.3	-138690	NA	NA	NA	21	21	0	5	5	0	25	17	8	10	5	5	5	5	0
chr1	129596001	129597000	1000	*	3.35635e-09	1.04234e-05	33.8095	Exon (NM_172485.3/Thsd7b, exon 3 of 28)	1	129608725	129616189	7465	2	Gm36347	XR_387357.2	19189	NM_172485.3;XM_011247966.2;XM_011247964.1;XM_011247965.1	Thsd7b;Thsd7b;Thsd7b;Thsd7b	0;0;0;0	14	14	0	13	13	0	70	27	43	10	6	4	6	6	0
chr1	130732001	130733000	1000	*	4.3205e-09	1.27074e-05	-53.7004	Promoter (<=1kb)	1	130731976	130744622	12647	1	AA986860	NM_177604.3	25	XM_017319617.1;NM_177604.3;NM_001162415.1	AA986860;AA986860;Pfkfb2	0;0;-2748	16	1	15	5	4	1	11	11	0	7	7	0	21	19	2
chr1	130804001	130805000	1000	*	1.27899e-06	0.00116802	-44.0972	Promoter (1-2kb)	1	130802961	130814589	11629	1	Fcamr	XM_011248055.2	1040	XM_006529787.3;XM_017321925.1;NM_001170632.1;NM_144960.2;XM_017321921.1;XM_017321922.1;XM_017321924.1;XM_017321923.1;XM_011248055.2;XR_001779412.1;XR_001779413.1;XR_001779414.1	Fcamr;Fcamr;Fcamr;Fcamr;Fcamr;Fcamr;Fcamr;Fcamr;Fcamr;LOC102640771;LOC102640771;LOC102640771	0;0;0;0;0;0;0;0;0;13910;13910;13910	27	15	12	16	9	7	6	6	0	5	5	0	17	17	0
chr1	131822001	131823000	1000	*	0.000147043	0.0341405	-22.4884	Distal Intergenic	1	131828012	131848863	20852	1	Slc41a1	NM_173865.3	-5012	XM_017319635.1;XM_006529338.3;XM_006529339.2;NM_178079.3	Pm20d1;Pm20d1;Pm20d1;Pm20d1	24617;24617;24616;24606	99	35	64	42	19	23	42	25	17	30	20	10	37	23	14
chr1	132838001	132839000	1000	*	1.21223e-06	0.0011245	-36.6667	Distal Intergenic	1	132880355	132940005	59651	1	Lrrn2	NM_010732.4	-41355	NA	NA	NA	15	9	6	21	14	7	12	12	0	23	23	0	8	8	0
chr1	133033001	133034000	1000	*	5.2092e-05	0.0173063	-46.6667	Promoter (<=1kb)	1	133033962	133034034	73	1	n-TKctt26	rna4178	0	XR_878532.1;NM_001302802.1;rna4179;rna4178	Gm41953;Mdm4;n-TKctt25;n-TKctt26	0;-2414;399;0	10	0	10	15	0	15	5	5	0	5	0	5	5	2	3
chr1	134407001	134408000	1000	*	9.57621e-05	0.0259799	31.1111	Promoter (1-2kb)	1	134405990	134411738	5749	1	Cyb5r1	NM_028057.2	1011	XR_387196.2;NM_028057.2	Cyb5r1;Cyb5r1	0;0	17	17	0	31	31	0	5	5	0	6	4	2	5	2	3
chr1	135811001	135812000	1000	*	0.000223716	0.0441525	-20.8333	Distal Intergenic	1	135818598	135833341	14744	1	Lad1	NM_133664.3	-6598	XM_006529382.3;XM_011247974.2;NM_021467.5;NM_001112702.1	Tnni1;Tnni1;Tnni1;Tnni1	27968;27959;11580;11490	12	11	1	27	18	9	12	12	0	10	10	0	11	11	0
chr1	136366001	136367000	1000	*	0.000159779	0.0359297	-23.7628	Distal Intergenic	1	136268253	136346399	78147	2	Camsap2	XM_006529832.2	-19602	NA	NA	NA	61	32	29	81	42	39	39	37	2	74	49	25	78	52	26
chr1	136375001	136376000	1000	*	2.63906e-05	0.0108514	-37.7494	Distal Intergenic	1	136268253	136346399	78147	2	Camsap2	XM_006529832.2	-28602	NA	NA	NA	31	5	26	10	6	4	5	4	1	43	29	14	5	4	1
chr1	136414001	136415000	1000	*	1.24203e-06	0.00114344	-27.3979	Promoter (<=1kb)	1	136415271	136440220	24950	1	Ddx59	NM_026500.3	-271	NR_024328.1;NM_026500.3;XM_006529843.2;XM_006529842.3;XM_006529844.3	9230116N13Rik;Ddx59;Ddx59;Ddx59;Ddx59	0;-271;-273;-273;-273	93	9	84	44	15	29	50	22	28	52	15	37	28	21	7
chr1	136465001	136466000	1000	*	9.30629e-05	0.0255527	-29.9135	Promoter (<=1kb)	1	136466290	136529591	63302	1	Kif14	XM_006529729.3	-290	XM_006529729.3;XM_011248043.2;XM_011248039.1;XM_011248040.1;XM_011248044.1;XM_011248046.1;XM_006529730.2;NM_001287179.2	Kif14;Kif14;Kif14;Kif14;Kif14;Kif14;Kif14;Kif14	-290;-290;-290;-290;-290;-290;-405;-1848	19	5	14	28	13	15	25	24	1	10	6	4	7	3	4
chr1	136706001	136707000	1000	*	3.63381e-06	0.00259929	43.3131	Intron (NR_037986.1/Platr22, intron 2 of 4)	1	136696211	136725728	29518	1	Platr22	NR_037986.1	9790	NR_037986.1	Platr22	0	18	16	2	47	34	13	28	10	18	35	15	20	12	4	8
chr1	137220001	137221000	1000	*	1.30494e-05	0.0065345	28.3519	Distal Intergenic	1	137353553	137357785	4233	1	Gm34244	XR_387445.2	-132553	NA	NA	NA	38	34	4	79	56	23	31	11	20	18	18	0	25	5	20
chr1	139268001	139269000	1000	*	8.04342e-05	0.0231066	21.399	Promoter (2-3kb)	1	139197709	139271619	73911	2	Crb1	XM_006529223.3	2619	XR_001783142.1;XR_001783143.1;XM_017319071.1;XM_006529223.3;XM_017319076.1;XM_006529224.3;XM_006529221.3;XM_006529217.3;NM_133239.2;XM_017319069.1;XR_001783144.1;XM_017319075.1	Crb1;Crb1;Crb1;Crb1;Crb1;Crb1;Crb1;Crb1;Crb1;Crb1;Crb1;Crb1	0;0;0;0;0;0;0;0;0;0;0;0	57	24	33	41	31	10	43	13	30	12	7	5	63	15	48
chr1	139288001	139289000	1000	*	9.0395e-06	0.00505565	-38.3866	Intron (XR_001783142.1/Crb1, intron 5 of 12)	1	139197709	139272663	74955	2	Crb1	XM_017319076.1	-15338	XR_001783142.1;XR_001783143.1;XM_017319071.1;XM_006529224.3;XM_006529221.3;XM_006529217.3;NM_133239.2;XM_017319069.1;XR_001783144.1;XM_017319075.1	Crb1;Crb1;Crb1;Crb1;Crb1;Crb1;Crb1;Crb1;Crb1;Crb1	0;0;0;0;0;0;0;0;0;0	23	4	19	33	26	7	50	44	6	20	20	0	21	15	6
chr1	143701001	143702000	1000	*	3.93514e-06	0.00276928	25.6755	Promoter (<=1kb)	1	143636851	143702888	66038	2	Cdc73	XM_006529366.3	888	NM_145991.2;XM_006529366.3;XM_006529365.1	Cdc73;Cdc73;Cdc73	0;0;0	46	16	30	49	18	31	46	6	40	34	5	29	40	1	39
chr1	144307001	144308000	1000	*	3.67731e-08	7.29624e-05	32.5096	Distal Intergenic	1	144312029	144312436	408	2	Gm7266	Gm7266	4436	Gm7266	Gm7266	4436	56	51	5	66	54	12	16	13	3	6	2	4	72	34	38
chr1	146507001	146508000	1000	*	0.000222676	0.0440159	-20.8306	Intron (NM_153539.3/Brinp3, intron 1 of 7)	1	146497687	146902472	404786	1	Brinp3	NM_001145807.1	9314	NM_153539.3;XM_017319792.1;XM_006529367.3;XM_006529368.3;XM_011247972.2;NM_001145807.1	Brinp3;Brinp3;Brinp3;Brinp3;Brinp3;Brinp3	0;0;0;0;0;0	23	17	6	28	22	6	25	25	0	31	30	1	18	17	1
chr1	146751001	146752000	1000	*	9.55046e-05	0.0259312	-45.6051	5' UTR	1	146497687	146902472	404786	1	Brinp3	NM_001145807.1	253314	NM_153539.3;XM_017319792.1;XM_006529367.3;XM_006529368.3;XM_011247972.2;NM_001145807.1	Brinp3;Brinp3;Brinp3;Brinp3;Brinp3;Brinp3	0;0;0;0;0;0	19	2	17	33	7	26	10	7	3	13	10	3	32	12	20
chr1	148049001	148050000	1000	*	3.25139e-06	0.00240666	-28.7143	Distal Intergenic	1	148498499	148498845	347	1	LOC108167605	LOC108167605	-448499	NA	NA	NA	25	16	9	14	11	3	26	26	0	6	6	0	16	16	0
chr1	148089001	148090000	1000	*	0.000100268	0.0266034	28.9061	Distal Intergenic	1	148498499	148498845	347	1	LOC108167605	LOC108167605	-408499	NA	NA	NA	38	25	13	39	30	9	39	15	24	27	8	19	27	16	11
chr1	148206001	148207000	1000	*	1.63396e-05	0.00775215	-32.2685	Distal Intergenic	1	148498499	148498845	347	1	LOC108167605	LOC108167605	-291499	NA	NA	NA	10	6	4	30	13	17	40	31	9	48	41	7	27	24	3
chr1	148397001	148398000	1000	*	0.000112802	0.0288348	-24.4591	Distal Intergenic	1	148498499	148498845	347	1	LOC108167605	LOC108167605	-100499	NA	NA	NA	75	25	50	49	25	24	7	5	2	70	38	32	62	46	16
chr1	151320001	151321000	1000	*	4.25644e-05	0.0151649	-28.3505	Intron (XR_001779480.1/LOC108167733, intron 1 of 1)	1	151344309	151364418	20110	1	Ivns1abp	XM_006529088.3	-23309	XR_001779480.1	LOC108167733	0	98	54	44	81	27	54	86	53	33	31	30	1	86	51	35
chr1	151861001	151862000	1000	*	0.000211892	0.0427115	-29.8039	Distal Intergenic	1	151853919	151855020	1102	2	Gm25279	XR_387475.2	-5981	NA	NA	NA	10	0	10	21	0	21	5	0	5	17	5	12	5	3	2
chr1	152189001	152190000	1000	*	0.000221934	0.0439299	22.3206	Distal Intergenic	1	152128566	152129432	867	1	Gm8964	Gm8964	60435	NA	NA	NA	27	20	7	33	30	3	26	14	12	15	4	11	5	5	0
chr1	153620001	153621000	1000	*	0.000212804	0.0428178	20.5616	Distal Intergenic	1	153652953	153697669	44717	1	Rgs8	XM_006529829.3	-31953	NA	NA	NA	87	40	47	84	34	50	63	7	56	74	13	61	117	46	71
chr1	155281001	155282000	1000	*	7.25461e-08	0.00012296	22.4104	3' UTR	1	155246897	155256851	9955	1	Gm31102	XR_387500.3	34104	NM_011273.2	Xpr1	0	62	60	2	88	80	8	52	48	4	41	26	15	70	41	29
chr1	155490001	155491000	1000	*	1.27892e-05	0.00645918	38.0573	Distal Intergenic	1	155520173	155527111	6939	2	Gm5532	NR_132128.1	36111	NA	NA	NA	46	38	8	30	29	1	15	7	8	14	6	8	23	15	8
chr1	156304001	156305000	1000	*	8.7026e-07	0.000872764	27.8767	Promoter (<=1kb)	1	156255296	156304983	49688	2	Tdrd5	XM_006496728.2	0	XM_006496734.1;NM_001134741.1;NM_001277730.1;XM_006496728.2;XM_006496731.2;XM_006496733.2;XM_006496726.3;XM_006496727.3;XM_006496729.3;XR_001783746.1;XM_006496730.2;XM_006496732.2;XM_011238780.2	Tdrd5;Tdrd5;Tdrd5;Tdrd5;Tdrd5;Tdrd5;Tdrd5;Tdrd5;Tdrd5;Tdrd5;Tdrd5;Tdrd5;Tdrd5	-1533;-653;-395;0;0;0;0;0;0;0;0;0;0	60	46	14	17	8	9	55	18	37	15	5	10	39	14	25
chr1	156311001	156312000	1000	*	9.15169e-08	0.00014596	49.5833	Promoter (<=1kb)	1	156310719	156328035	17317	1	Nphs2	NM_130456.4	282	XM_011238765.2;XM_006496683.3;NM_130456.4;XM_006496684.3	Nphs2;Nphs2;Nphs2;Nphs2	0;0;0;-4823	24	13	11	21	14	7	20	5	15	5	0	5	40	3	37
chr1	156610001	156611000	1000	*	1.22789e-06	0.00113693	24.6732	Intron (XM_006496615.3/Abl2, intron 1 of 10)	1	156614904	156649568	34665	1	Abl2	XM_006496613.3	-3904	XM_006496615.3;XM_006496616.3;XM_011238737.2;XM_006496621.3;XM_011238738.2;NM_001136104.1;NM_009595.3;XM_006496613.3;XM_006496614.3;XM_006496617.3;XM_006496620.3;XM_006496622.3	Abl2;Abl2;Abl2;Abl2;Abl2;Abl2;Abl2;Abl2;Abl2;Abl2;Abl2;Abl2	0;0;0;0;0;0;0;-3904;-3904;-3904;-3906;-3906	17	15	2	41	41	0	16	4	12	6	6	0	6	5	1
chr1	158844001	158845000	1000	*	5.358e-05	0.0176715	-32.3637	Intron (XM_006496824.3/Pappa2, intron 10 of 23)	1	158711731	158957438	245708	2	Pappa2	NM_001085376.2	112438	XM_006496824.3;XM_006496823.3;XM_011238806.2;NM_001085376.2	Pappa2;Pappa2;Pappa2;Pappa2	0;0;0;0	29	12	17	112	54	58	10	9	1	5	3	2	27	22	5
chr1	159566001	159567000	1000	*	1.12545e-05	0.00590477	36.6617	Intron (XM_006496742.3/Tnr, intron 1 of 22)	1	159523769	159924922	401154	1	Tnr	NM_022312.3	42232	XM_006496742.3;XM_006496745.3;NM_022312.3	Tnr;Tnr;Tnr	0;0;0	31	28	3	46	38	8	17	5	12	5	3	2	25	15	10
chr1	159670001	159671000	1000	*	4.88484e-15	5.61476e-11	-69.491	Intron (XM_006496742.3/Tnr, intron 1 of 22)	1	159689989	159931729	241741	1	Tnr	XM_006496743.2	-18989	XM_006496742.3;XM_006496745.3;NM_022312.3	Tnr;Tnr;Tnr	0;0;0	28	10	18	26	3	23	38	36	2	13	11	2	6	6	0
chr1	160194001	160195000	1000	*	2.98941e-05	0.011891	25.6576	Promoter (<=1kb)	1	160195260	160201186	5927	1	Mrps14	NM_025474.3	-260	NM_025474.3;XM_006496954.3	Mrps14;Mrps14	-260;-331	49	33	16	45	23	22	10	4	6	48	4	44	42	22	20
chr1	161346001	161347000	1000	*	0.000202508	0.0416223	-58.4689	Distal Intergenic	1	161395438	161418206	22769	1	Tnfsf4	NM_009452.2	-48438	NA	NA	NA	5	1	4	6	1	5	28	16	12	18	16	2	32	27	5
chr1	161999001	162000000	1000	*	5.52494e-06	0.00351907	-21.0049	Intron (XM_006496604.3/Dnm3, intron 21 of 21)	1	162004969	162016485	11517	1	2810442N19Rik	NR_040562.1	-4969	NR_040562.1;XM_006496604.3;NM_001038619.1;XM_006496601.3;XM_006496602.3;NM_172646.2	2810442N19Rik;Dnm3;Dnm3;Dnm3;Dnm3;Dnm3	-4969;0;0;0;0;0	111	46	65	100	60	40	103	66	37	75	64	11	111	73	38
chr1	162879001	162880000	1000	*	3.91564e-06	0.00276018	-37.4257	Intron (XM_006496949.3/Fmo2, intron 7 of 8)	1	162872700	162873622	923	1	Gm32197	XR_001779516.1	6301	XM_006496949.3;NM_018881.3	Fmo2;Fmo2	0;0	48	26	22	41	27	14	13	12	1	16	16	0	5	5	0
chr1	163907001	163908000	1000	*	0.000170679	0.0373885	25.9251	Intron (XM_006496681.3/Kifap3, intron 19 of 20)	1	163929100	163955126	26027	1	Scyl3	NM_001286002.1	-21100	XM_006496681.3;XM_006496679.3;NM_001305643.1;NM_010629.3	Kifap3;Kifap3;Kifap3;Kifap3	0;0;0;0	13	13	0	18	18	0	38	30	8	14	11	3	17	11	6
chr1	163995001	163996000	1000	*	1.70815e-07	0.000238235	-31.2103	Promoter (<=1kb)	1	163952757	163994971	42215	2	BC055324	XM_006496910.3	-30	XM_006496911.3;XM_006496909.3;XM_006496910.3;NM_201364.1;XM_006496983.2;NM_027279.2	BC055324;BC055324;BC055324;BC055324;Mettl18;Mettl18	-30;-30;-30;-220;0;0	61	18	43	56	2	54	45	29	16	5	2	3	67	26	41
chr1	165215001	165216000	1000	*	0.000159952	0.0359605	24.3827	3' UTR	1	165174341	165194443	20103	2	Sft2d2	XR_001784762.1	-20558	NM_145513.4;XM_006496780.3;XM_006496779.3;XM_011238792.2	Tiprl;Tiprl;Tiprl;Tiprl	0;0;0;0	10	10	0	54	53	1	27	20	7	5	3	2	10	9	1
chr1	165253001	165254000	1000	*	5.76358e-05	0.0184732	23.9295	Intron (XM_011238792.2/Tiprl, intron 2 of 7)	1	165214979	165237006	22028	2	Tiprl	XM_006496779.3	-15995	XM_011238792.2	Tiprl	0	54	50	4	33	26	7	25	9	16	22	12	10	19	18	1
chr1	165602001	165603000	1000	*	0.000113937	0.0290024	26.8877	Intron (NM_001001880.2/Mpzl1, intron 4 of 4)	1	165592181	165634541	42361	2	Mpzl1	NM_001001880.2	31541	NM_001001880.2;NM_001083897.1;XM_006496974.3	Mpzl1;Mpzl1;Mpzl1	0;0;0	74	46	28	61	39	22	36	10	26	39	9	30	59	34	25
chr1	165611001	165612000	1000	*	5.68977e-07	0.000620477	-23.7556	Intron (NM_001001880.2/Mpzl1, intron 1 of 4)	1	165592181	165634541	42361	2	Mpzl1	NM_001001880.2	22541	NM_001001880.2;NM_001083897.1;XM_006496974.3	Mpzl1;Mpzl1;Mpzl1	0;0;0	32	21	11	56	48	8	11	11	0	58	57	1	34	34	0
chr1	166033001	166034000	1000	*	8.42722e-05	0.0238124	21.8182	Distal Intergenic	1	166043277	166043712	436	2	Gm7626	Gm7626	9712	NA	NA	NA	30	30	0	17	17	0	11	6	5	5	5	0	5	4	1
chr1	166299001	166300000	1000	*	5.28958e-05	0.0175036	-24.2109	Intron (XM_006496593.3/Ildr2, intron 5 of 8)	1	166256238	166316832	60595	1	Ildr2	XM_006496594.3	42763	XM_006496593.3;XM_006496596.3;XM_011238731.2;XM_006496595.3;NM_001164528.1;XM_006496594.3	Ildr2;Ildr2;Ildr2;Ildr2;Ildr2;Ildr2	0;0;0;0;0;0	54	42	12	23	14	9	66	61	5	32	31	1	46	42	4
chr1	166687001	166688000	1000	*	2.07791e-10	9.31797e-07	-23.1474	Distal Intergenic	1	166662055	166681845	19791	2	Fmo9	NM_172844.2	-5156	NA	NA	NA	136	28	108	65	22	43	41	16	25	51	22	29	103	71	32
chr1	166799001	166800000	1000	*	3.59826e-07	0.000431446	24.0469	Distal Intergenic	1	166855120	166868091	12972	1	Gm33404	XR_373681.2	-55120	NA	NA	NA	42	38	4	53	49	4	61	38	23	43	25	18	11	9	2
chr1	167309001	167310000	1000	*	0.000127908	0.031178	37.6789	Promoter (<=1kb)	1	167308670	167333978	25309	1	Tmco1	NM_001039483.1	331	NM_001039483.1	Tmco1	0	24	17	7	58	23	35	34	8	26	17	0	17	24	7	17
chr1	168495001	168496000	1000	*	4.27872e-05	0.0152143	27.677	Promoter (<=1kb)	1	168475634	168495913	20280	2	Gm39696	XR_865718.1	0	XR_865718.1;NR_105766.1;NA	Gm39696;Mir6348;Mir6348	0;4358;4261	17	15	2	27	27	0	59	35	24	10	4	6	20	20	0
chr1	168665001	168666000	1000	*	0.000115426	0.0291774	30.6246	Intron (XR_373692.2/Gm34320, intron 2 of 3)	1	168661495	168710128	48634	2	Gm34320	XR_373692.2	44128	XR_373692.2;XR_373693.2;XR_373691.2	Gm34320;Gm34320;Gm34320	0;0;0	41	37	4	20	20	0	18	14	4	14	5	9	5	4	1
chr1	169970001	169971000	1000	*	2.91147e-05	0.0116505	41.8945	Promoter (<=1kb)	1	169969409	169972396	2988	1	3110045C21Rik	NR_040438.1	592	NR_040438.1;NM_022563.2;XM_006496698.3;XM_006496697.3;XM_006496696.3;XM_006496667.2;NM_010476.3;XM_011238758.1;XM_017317108.1	3110045C21Rik;Ddr2;Ddr2;Ddr2;Ddr2;Hsd17b7;Hsd17b7;Hsd17b7;Hsd17b7	0;0;0;0;0;-765;-796;-763;-761	16	15	1	12	7	5	56	20	36	22	5	17	25	11	14
chr1	169997001	169998000	1000	*	3.21267e-06	0.00238506	-30.2359	Exon (NM_022563.2/Ddr2, exon 8 of 17)	1	169969409	169972396	2988	1	3110045C21Rik	NR_040438.1	27592	NM_022563.2;XM_006496698.3;XM_006496697.3;XM_006496696.3	Ddr2;Ddr2;Ddr2;Ddr2	0;0;0;0	15	10	5	35	23	12	29	28	1	18	18	0	55	51	4
chr1	170489001	170490000	1000	*	0.000246516	0.0468527	20	Intron (XR_373617.3/Nos1ap, intron 2 of 9)	1	170533084	170540809	7726	2	LOC108167745	XR_001779534.1	50809	XR_373617.3;NM_001109985.1;NM_027528.2	Nos1ap;Nos1ap;Nos1ap	0;0;0	5	5	0	15	15	0	5	5	0	8	8	0	20	8	12
chr1	170631001	170632000	1000	*	0.000263203	0.0486601	-25.8183	Promoter (<=1kb)	1	170630872	170631553	682	1	Gm7299	Gm7299	129	Gm7299	Gm7299	0	58	33	25	38	16	22	34	26	8	10	7	3	39	31	8
chr1	170750001	170751000	1000	*	2.68526e-08	5.75001e-05	-28.5534	Intron (NM_001081304.1/Atf6, intron 14 of 15)	1	170850526	170851536	1011	2	Gm29733	XM_003945320.3	100536	NM_001081304.1;XM_011238796.2;XM_006496792.3	Atf6;Atf6;Atf6	0;0;0	44	31	13	21	15	6	66	65	1	5	5	0	24	24	0
chr1	171036001	171037000	1000	*	0.000171965	0.0376127	-26.2286	Promoter (<=1kb)	1	171037029	171037100	72	2	n-TDgtc4	rna5580	100	XR_373703.2;rna5580;rna5581;rna5582;rna5579	Gm35090;n-TDgtc4;n-TGtcc2;n-TLcag3;n-TNgtt6	-1983;100;1068;-1614;-1986	24	3	21	45	10	35	11	5	6	26	8	18	55	30	25
chr1	171057001	171058000	1000	*	0.00024903	0.0470311	-29.0813	Promoter (1-2kb)	1	171051169	171059403	8235	2	Fcgr3	NM_010188.5	1403	NM_010188.5;XM_006496661.3;XM_006496660.2;XM_006496658.2;XM_006496659.3	Fcgr3;Fcgr3;Fcgr3;Fcgr3;Fcgr3	0;0;0;0;0	45	19	26	28	14	14	17	8	9	27	23	4	15	14	1
[truncated: 1,476 more rows]
