# Supplementary material for: Autism-like behaviors and abnormality of glucose metabolism in offspring derived from aging males with epigenetically modified sperm
Source: Aging (Albany NY). 2020 Oct 13;12(19):19766–84. doi: 10.18632/aging.104061 (PMC7732289; doi:10.18632/aging.104061)
Supplement: Supplementary Table 3 [file aging-12-104061-s004..xlsx]

## Sheet: DownGO_Result
GOID	GOTerm	DifGene	AllDifGene	GeneInGO	AllGene	P-Value	FDR	Enrichment	(-log10P)
GO:0007275	multicellular organismal development	63	818	997	21946	3.13505e-05	0.0805081	1.6953	4.50376	1.09416
GO:0007399	nervous system development	29	818	357	21946	7.88048e-05	0.101185	2.17937	4.10345	0.994882
GO:0061157	mRNA destabilization	3	818	4	21946	0.000200655	0.12882	20.1216	3.69755	0.890016
GO:0034391	regulation of smooth muscle cell apoptotic process	3	818	4	21946	0.000200655	0.12882	20.1216	3.69755	0.890016
GO:0030154	cell differentiation	46	818	722	21946	0.000304542	0.156413	1.70932	3.51635	0.805728
GO:0098656	anion transmembrane transport	5	818	20	21946	0.000690703	0.173947	6.70721	3.16071	0.759583
GO:0035641	locomotory exploration behavior	4	818	12	21946	0.000746308	0.173947	8.94295	3.12708	0.759583
GO:0019933	cAMP-mediated signaling	5	818	21	21946	0.000878939	0.173947	6.38782	3.05604	0.759583
GO:0051301	cell division	26	818	356	21946	0.000912405	0.173947	1.95941	3.03981	0.759583
GO:0007156	homophilic cell adhesion via plasma membrane adhesion molecules	14	818	143	21946	0.000933179	0.173947	2.6266	3.03003	0.759583
GO:0006642	triglyceride mobilization	3	818	6	21946	0.00094831	0.173947	13.4144	3.02305	0.759583
GO:0015698	inorganic anion transport	3	818	6	21946	0.00094831	0.173947	13.4144	3.02305	0.759583
GO:0065004	protein-DNA complex assembly	3	818	6	21946	0.00094831	0.173947	13.4144	3.02305	0.759583
GO:0038027	apolipoprotein A-I-mediated signaling pathway	3	818	6	21946	0.00094831	0.173947	13.4144	3.02305	0.759583
GO:0032743	positive regulation of interleukin-2 production	4	818	13	21946	0.00104633	0.178176	8.25503	2.98033	0.749151
GO:0016445	somatic diversification of immunoglobulins	2	818	2	21946	0.00138766	0.178176	26.8289	2.85772	0.749151
GO:0042891	antibiotic transport	2	818	2	21946	0.00138766	0.178176	26.8289	2.85772	0.749151
GO:2000820	negative regulation of transcription from RNA polymerase II promoter involved in smooth muscle cell differentiation	2	818	2	21946	0.00138766	0.178176	26.8289	2.85772	0.749151
GO:1901898	negative regulation of relaxation of cardiac muscle	2	818	2	21946	0.00138766	0.178176	26.8289	2.85772	0.749151
GO:0036304	umbilical cord morphogenesis	2	818	2	21946	0.00138766	0.178176	26.8289	2.85772	0.749151
GO:0045944	positive regulation of transcription from RNA polymerase II promoter	54	818	954	21946	0.00155383	0.190012	1.51861	2.8086	0.72122
GO:0007019	microtubule depolymerization	4	818	15	21946	0.00188213	0.219695	7.15436	2.72535	0.658179
GO:0007018	microtubule-based movement	9	818	77	21946	0.00222267	0.240609	3.13584	2.65312	0.618688
GO:0021799	cerebral cortex radially oriented cell migration	4	818	16	21946	0.00243607	0.240609	6.70721	2.61331	0.618688
GO:0006198	cAMP catabolic process	4	818	16	21946	0.00243607	0.240609	6.70721	2.61331	0.618688
GO:0001678	cellular glucose homeostasis	4	818	16	21946	0.00243607	0.240609	6.70721	2.61331	0.618688
GO:0007411	axon guidance	12	818	126	21946	0.0026556	0.247846	2.55513	2.57584	0.605818
GO:0007420	brain development	17	818	213	21946	0.00270237	0.247846	2.14127	2.56826	0.605818
GO:0006885	regulation of pH	5	818	27	21946	0.00289829	0.256649	4.96831	2.53786	0.590661
GO:0010976	positive regulation of neuron projection development	10	818	96	21946	0.00307045	0.262831	2.79467	2.5128	0.580324
GO:0048015	phosphatidylinositol-mediated signaling	5	818	28	21946	0.00342165	0.276641	4.79087	2.46576	0.558083
GO:0031017	exocrine pancreas development	3	818	9	21946	0.00366162	0.276641	8.94295	2.43633	0.558083
GO:0002063	chondrocyte development	4	818	18	21946	0.0038601	0.276641	5.96197	2.4134	0.558083
GO:0003199	endocardial cushion to mesenchymal transition involved in heart valve formation	2	818	3	21946	0.00405979	0.276641	17.8859	2.3915	0.558083
GO:2001212	regulation of vasculogenesis	2	818	3	21946	0.00405979	0.276641	17.8859	2.3915	0.558083
GO:0060379	cardiac muscle cell myoblast differentiation	2	818	3	21946	0.00405979	0.276641	17.8859	2.3915	0.558083
GO:0015858	nucleoside transport	2	818	3	21946	0.00405979	0.276641	17.8859	2.3915	0.558083
GO:0051897	positive regulation of protein kinase B signaling	9	818	86	21946	0.00471571	0.276641	2.80767	2.32645	0.558083
GO:0048149	behavioral response to ethanol	3	818	10	21946	0.00508684	0.276641	8.04866	2.29355	0.558083
GO:0051024	positive regulation of immunoglobulin secretion	3	818	10	21946	0.00508684	0.276641	8.04866	2.29355	0.558083
GO:0032467	positive regulation of cytokinesis	5	818	31	21946	0.00539592	0.276641	4.32723	2.26793	0.558083
GO:0048557	embryonic digestive tract morphogenesis	4	818	21	21946	0.00690978	0.276641	5.11026	2.16054	0.558083
GO:0030902	hindbrain development	4	818	21	21946	0.00690978	0.276641	5.11026	2.16054	0.558083
GO:0060045	positive regulation of cardiac muscle cell proliferation	4	818	21	21946	0.00690978	0.276641	5.11026	2.16054	0.558083
GO:0032259	methylation	14	818	179	21946	0.00731525	0.276641	2.09835	2.13577	0.558083
GO:0007155	cell adhesion	32	818	544	21946	0.00773885	0.276641	1.57817	2.11132	0.558083
GO:0003161	cardiac conduction system development	2	818	4	21946	0.00791893	0.276641	13.4144	2.10133	0.558083
GO:0016577	histone demethylation	2	818	4	21946	0.00791893	0.276641	13.4144	2.10133	0.558083
GO:0006290	pyrimidine dimer repair	2	818	4	21946	0.00791893	0.276641	13.4144	2.10133	0.558083
GO:0072337	modified amino acid transport	2	818	4	21946	0.00791893	0.276641	13.4144	2.10133	0.558083
GO:0036289	peptidyl-serine autophosphorylation	2	818	4	21946	0.00791893	0.276641	13.4144	2.10133	0.558083
GO:0032252	secretory granule localization	2	818	4	21946	0.00791893	0.276641	13.4144	2.10133	0.558083
GO:0055092	sterol homeostasis	2	818	4	21946	0.00791893	0.276641	13.4144	2.10133	0.558083
GO:1902603	carnitine transmembrane transport	2	818	4	21946	0.00791893	0.276641	13.4144	2.10133	0.558083
GO:0048713	regulation of oligodendrocyte differentiation	2	818	4	21946	0.00791893	0.276641	13.4144	2.10133	0.558083
GO:0060842	arterial endothelial cell differentiation	2	818	4	21946	0.00791893	0.276641	13.4144	2.10133	0.558083
GO:0050829	defense response to Gram-negative bacterium	5	818	34	21946	0.00806288	0.276641	3.94542	2.09351	0.558083
GO:0043433	negative regulation of sequence-specific DNA binding transcription factor activity	7	818	62	21946	0.00807767	0.276641	3.02906	2.09271	0.558083
GO:0045444	fat cell differentiation	7	818	63	21946	0.0088029	0.276641	2.98098	2.05537	0.558083
GO:0040037	negative regulation of fibroblast growth factor receptor signaling pathway	3	818	12	21946	0.0088208	0.276641	6.70721	2.05449	0.558083
GO:0003222	ventricular trabecula myocardium morphogenesis	3	818	12	21946	0.0088208	0.276641	6.70721	2.05449	0.558083
GO:0060317	cardiac epithelial to mesenchymal transition	3	818	12	21946	0.0088208	0.276641	6.70721	2.05449	0.558083
GO:0032793	positive regulation of CREB transcription factor activity	3	818	12	21946	0.0088208	0.276641	6.70721	2.05449	0.558083
GO:0016310	phosphorylation	39	818	702	21946	0.00885709	0.276641	1.49049	2.05271	0.558083
GO:0007605	sensory perception of sound	11	818	130	21946	0.00943363	0.276641	2.27013	2.02532	0.558083
GO:1902476	chloride transmembrane transport	8	818	80	21946	0.00982477	0.276641	2.68289	2.00768	0.558083
GO:0001525	angiogenesis	16	818	224	21946	0.0100579	0.276641	1.91635	1.99749	0.558083
GO:0007626	locomotory behavior	9	818	97	21946	0.0102337	0.276641	2.48927	1.98997	0.558083
GO:0036092	phosphatidylinositol-3-phosphate biosynthetic process	3	818	13	21946	0.0111531	0.276641	6.19127	1.9526	0.558083
GO:2000678	negative regulation of transcription regulatory region DNA binding	3	818	13	21946	0.0111531	0.276641	6.19127	1.9526	0.558083
GO:0050435	beta-amyloid metabolic process	3	818	13	21946	0.0111531	0.276641	6.19127	1.9526	0.558083
GO:0035418	protein localization to synapse	3	818	13	21946	0.0111531	0.276641	6.19127	1.9526	0.558083
GO:0021772	olfactory bulb development	4	818	24	21946	0.011232	0.276641	4.47148	1.94954	0.558083
GO:0035556	intracellular signal transduction	24	818	389	21946	0.011401	0.276641	1.65525	1.94306	0.558083
GO:0035335	peptidyl-tyrosine dephosphorylation	9	818	99	21946	0.0116146	0.276641	2.43899	1.935	0.558083
GO:0001822	kidney development	10	818	118	21946	0.0128484	0.276641	2.27363	1.89115	0.558083
GO:0007567	parturition	2	818	5	21946	0.0128731	0.276641	10.7315	1.89032	0.558083
GO:0001780	neutrophil homeostasis	2	818	5	21946	0.0128731	0.276641	10.7315	1.89032	0.558083
GO:0061551	trigeminal ganglion development	2	818	5	21946	0.0128731	0.276641	10.7315	1.89032	0.558083
GO:2000369	regulation of clathrin-mediated endocytosis	2	818	5	21946	0.0128731	0.276641	10.7315	1.89032	0.558083
GO:0032754	positive regulation of interleukin-5 production	2	818	5	21946	0.0128731	0.276641	10.7315	1.89032	0.558083
GO:0032736	positive regulation of interleukin-13 production	2	818	5	21946	0.0128731	0.276641	10.7315	1.89032	0.558083
GO:0033554	cellular response to stress	2	818	5	21946	0.0128731	0.276641	10.7315	1.89032	0.558083
GO:0036336	dendritic cell migration	2	818	5	21946	0.0128731	0.276641	10.7315	1.89032	0.558083
GO:0051971	positive regulation of transmission of nerve impulse	2	818	5	21946	0.0128731	0.276641	10.7315	1.89032	0.558083
GO:0035912	dorsal aorta morphogenesis	2	818	5	21946	0.0128731	0.276641	10.7315	1.89032	0.558083
GO:0019388	galactose catabolic process	2	818	5	21946	0.0128731	0.276641	10.7315	1.89032	0.558083
GO:0080009	mRNA methylation	2	818	5	21946	0.0128731	0.276641	10.7315	1.89032	0.558083
GO:0015879	carnitine transport	2	818	5	21946	0.0128731	0.276641	10.7315	1.89032	0.558083
GO:0006606	protein import into nucleus	5	818	38	21946	0.0128777	0.276641	3.53011	1.89016	0.558083
GO:0070979	protein K11-linked ubiquitination	4	818	25	21946	0.0129851	0.276641	4.29262	1.88656	0.558083
GO:0006821	chloride transport	8	818	84	21946	0.0129918	0.276641	2.55513	1.88633	0.558083
GO:0010667	negative regulation of cardiac muscle cell apoptotic process	3	818	14	21946	0.0138071	0.276641	5.74904	1.8599	0.558083
GO:0045600	positive regulation of fat cell differentiation	5	818	40	21946	0.0158882	0.276641	3.35361	1.79893	0.558083
GO:0051279	regulation of release of sequestered calcium ion into cytosol	3	818	15	21946	0.0167884	0.276641	5.36577	1.77499	0.558083
GO:2000310	regulation of N-methyl-D-aspartate selective glutamate receptor activity	3	818	15	21946	0.0167884	0.276641	5.36577	1.77499	0.558083
GO:0016126	sterol biosynthetic process	4	818	27	21946	0.016991	0.276641	3.97464	1.76978	0.558083
GO:0051017	actin filament bundle assembly	4	818	27	21946	0.016991	0.276641	3.97464	1.76978	0.558083
GO:0009117	nucleotide metabolic process	4	818	27	21946	0.016991	0.276641	3.97464	1.76978	0.558083
GO:0007628	adult walking behavior	5	818	41	21946	0.0175553	0.276641	3.27181	1.75559	0.558083
GO:0002062	chondrocyte differentiation	5	818	41	21946	0.0175553	0.276641	3.27181	1.75559	0.558083
GO:0030593	neutrophil chemotaxis	5	818	41	21946	0.0175553	0.276641	3.27181	1.75559	0.558083
GO:0051056	regulation of small GTPase mediated signal transduction	6	818	56	21946	0.0175638	0.276641	2.87452	1.75538	0.558083
GO:0010717	regulation of epithelial to mesenchymal transition	2	818	6	21946	0.0188355	0.276641	8.94295	1.72502	0.558083
GO:0060976	coronary vasculature development	2	818	6	21946	0.0188355	0.276641	8.94295	1.72502	0.558083
GO:0090031	positive regulation of steroid hormone biosynthetic process	2	818	6	21946	0.0188355	0.276641	8.94295	1.72502	0.558083
GO:0060385	axonogenesis involved in innervation	2	818	6	21946	0.0188355	0.276641	8.94295	1.72502	0.558083
GO:0006004	fucose metabolic process	2	818	6	21946	0.0188355	0.276641	8.94295	1.72502	0.558083
GO:0007256	activation of JNKK activity	2	818	6	21946	0.0188355	0.276641	8.94295	1.72502	0.558083
GO:0002830	positive regulation of type 2 immune response	2	818	6	21946	0.0188355	0.276641	8.94295	1.72502	0.558083
GO:0046834	lipid phosphorylation	2	818	6	21946	0.0188355	0.276641	8.94295	1.72502	0.558083
GO:0035356	cellular triglyceride homeostasis	2	818	6	21946	0.0188355	0.276641	8.94295	1.72502	0.558083
GO:0001661	conditioned taste aversion	2	818	6	21946	0.0188355	0.276641	8.94295	1.72502	0.558083
GO:0043030	regulation of macrophage activation	2	818	6	21946	0.0188355	0.276641	8.94295	1.72502	0.558083
GO:0007179	transforming growth factor beta receptor signaling pathway	7	818	73	21946	0.0188857	0.276641	2.57263	1.72387	0.558083
GO:0007049	cell cycle	33	818	605	21946	0.0192847	0.276641	1.46339	1.71479	0.558083
GO:0021762	substantia nigra development	5	818	42	21946	0.019334	0.276641	3.19391	1.71368	0.558083
GO:0032981	mitochondrial respiratory chain complex I assembly	3	818	16	21946	0.0201004	0.276641	5.03041	1.69679	0.558083
GO:0021846	cell proliferation in forebrain	3	818	16	21946	0.0201004	0.276641	5.03041	1.69679	0.558083
GO:1901379	regulation of potassium ion transmembrane transport	3	818	16	21946	0.0201004	0.276641	5.03041	1.69679	0.558083
GO:0060047	heart contraction	3	818	16	21946	0.0201004	0.276641	5.03041	1.69679	0.558083
GO:0006915	apoptotic process	31	818	564	21946	0.0207736	0.276641	1.47464	1.68249	0.558083
GO:0022008	neurogenesis	5	818	43	21946	0.021227	0.276641	3.11963	1.67311	0.558083
GO:0042060	wound healing	8	818	92	21946	0.0214667	0.276641	2.33294	1.66824	0.558083
GO:0007009	plasma membrane organization	3	818	17	21946	0.023745	0.276641	4.7345	1.62443	0.558083
GO:0032435	negative regulation of proteasomal ubiquitin-dependent protein catabolic process	3	818	17	21946	0.023745	0.276641	4.7345	1.62443	0.558083
GO:0051453	regulation of intracellular pH	3	818	17	21946	0.023745	0.276641	4.7345	1.62443	0.558083
GO:0015701	bicarbonate transport	3	818	17	21946	0.023745	0.276641	4.7345	1.62443	0.558083
GO:2000311	regulation of alpha-amino-3-hydroxy-5-methyl-4-isoxazole propionate selective glutamate receptor activity	3	818	17	21946	0.023745	0.276641	4.7345	1.62443	0.558083
GO:0018105	peptidyl-serine phosphorylation	8	818	94	21946	0.0240834	0.276641	2.28331	1.61828	0.558083
GO:0021983	pituitary gland development	4	818	30	21946	0.0243107	0.276641	3.57718	1.6142	0.558083
GO:0048663	neuron fate commitment	4	818	30	21946	0.0243107	0.276641	3.57718	1.6142	0.558083
GO:0006364	rRNA processing	9	818	113	21946	0.0254531	0.276641	2.13681	1.59426	0.558083
GO:0072112	glomerular visceral epithelial cell differentiation	2	818	7	21946	0.0257242	0.276641	7.66539	1.58966	0.558083
GO:0060539	diaphragm development	2	818	7	21946	0.0257242	0.276641	7.66539	1.58966	0.558083
GO:2000020	positive regulation of male gonad development	2	818	7	21946	0.0257242	0.276641	7.66539	1.58966	0.558083
GO:0021942	radial glia guided migration of Purkinje cell	2	818	7	21946	0.0257242	0.276641	7.66539	1.58966	0.558083
GO:0021517	ventral spinal cord development	2	818	7	21946	0.0257242	0.276641	7.66539	1.58966	0.558083
GO:0021978	telencephalon regionalization	2	818	7	21946	0.0257242	0.276641	7.66539	1.58966	0.558083
GO:0002726	positive regulation of T cell cytokine production	2	818	7	21946	0.0257242	0.276641	7.66539	1.58966	0.558083
GO:0046069	cGMP catabolic process	2	818	7	21946	0.0257242	0.276641	7.66539	1.58966	0.558083
GO:0014031	mesenchymal cell development	2	818	7	21946	0.0257242	0.276641	7.66539	1.58966	0.558083
GO:0010960	magnesium ion homeostasis	2	818	7	21946	0.0257242	0.276641	7.66539	1.58966	0.558083
GO:0001955	blood vessel maturation	2	818	7	21946	0.0257242	0.276641	7.66539	1.58966	0.558083
GO:0003300	cardiac muscle hypertrophy	2	818	7	21946	0.0257242	0.276641	7.66539	1.58966	0.558083
GO:0072075	metanephric mesenchyme development	2	818	7	21946	0.0257242	0.276641	7.66539	1.58966	0.558083
GO:0009629	response to gravity	2	818	7	21946	0.0257242	0.276641	7.66539	1.58966	0.558083
GO:0043497	regulation of protein heterodimerization activity	2	818	7	21946	0.0257242	0.276641	7.66539	1.58966	0.558083
GO:0032570	response to progesterone	4	818	31	21946	0.0271129	0.276641	3.46179	1.56682	0.558083
GO:0007162	negative regulation of cell adhesion	4	818	31	21946	0.0271129	0.276641	3.46179	1.56682	0.558083
GO:0006820	anion transport	4	818	31	21946	0.0271129	0.276641	3.46179	1.56682	0.558083
GO:0045184	establishment of protein localization	4	818	31	21946	0.0271129	0.276641	3.46179	1.56682	0.558083
GO:0046854	phosphatidylinositol phosphorylation	4	818	31	21946	0.0271129	0.276641	3.46179	1.56682	0.558083
GO:0042325	regulation of phosphorylation	3	818	18	21946	0.027722	0.276641	4.47148	1.55718	0.558083
GO:0061024	membrane organization	3	818	18	21946	0.027722	0.276641	4.47148	1.55718	0.558083
GO:0090314	positive regulation of protein targeting to membrane	3	818	18	21946	0.027722	0.276641	4.47148	1.55718	0.558083
GO:0060384	innervation	3	818	18	21946	0.027722	0.276641	4.47148	1.55718	0.558083
GO:0045666	positive regulation of neuron differentiation	8	818	97	21946	0.0284155	0.276641	2.21269	1.54645	0.558083
GO:0035264	multicellular organism growth	8	818	98	21946	0.0299717	0.276641	2.19011	1.52329	0.558083
GO:0050808	synapse organization	4	818	32	21946	0.0301001	0.276641	3.35361	1.52143	0.558083
GO:0030032	lamellipodium assembly	4	818	32	21946	0.0301001	0.276641	3.35361	1.52143	0.558083
GO:0061178	regulation of insulin secretion involved in cellular response to glucose stimulus	3	818	19	21946	0.0320298	0.276641	4.23613	1.49445	0.558083
GO:0005978	glycogen biosynthetic process	3	818	19	21946	0.0320298	0.276641	4.23613	1.49445	0.558083
GO:0048278	vesicle docking	3	818	19	21946	0.0320298	0.276641	4.23613	1.49445	0.558083
GO:0090102	cochlea development	3	818	19	21946	0.0320298	0.276641	4.23613	1.49445	0.558083
GO:0050919	negative chemotaxis	3	818	19	21946	0.0320298	0.276641	4.23613	1.49445	0.558083
GO:0016049	cell growth	5	818	48	21946	0.032484	0.276641	2.79467	1.48833	0.558083
GO:0006367	transcription initiation from RNA polymerase II promoter	4	818	33	21946	0.0332738	0.276641	3.25198	1.4779	0.558083
GO:0030705	cytoskeleton-dependent intracellular transport	2	818	8	21946	0.0334622	0.276641	6.70721	1.47545	0.558083
GO:0003184	pulmonary valve morphogenesis	2	818	8	21946	0.0334622	0.276641	6.70721	1.47545	0.558083
GO:1901642	nucleoside transmembrane transport	2	818	8	21946	0.0334622	0.276641	6.70721	1.47545	0.558083
GO:0045348	positive regulation of MHC class II biosynthetic process	2	818	8	21946	0.0334622	0.276641	6.70721	1.47545	0.558083
GO:0003208	cardiac ventricle morphogenesis	2	818	8	21946	0.0334622	0.276641	6.70721	1.47545	0.558083
GO:2000009	negative regulation of protein localization to cell surface	2	818	8	21946	0.0334622	0.276641	6.70721	1.47545	0.558083
GO:0051292	nuclear pore complex assembly	2	818	8	21946	0.0334622	0.276641	6.70721	1.47545	0.558083
GO:0007158	neuron cell-cell adhesion	2	818	8	21946	0.0334622	0.276641	6.70721	1.47545	0.558083
GO:0050863	regulation of T cell activation	2	818	8	21946	0.0334622	0.276641	6.70721	1.47545	0.558083
GO:0002070	epithelial cell maturation	2	818	8	21946	0.0334622	0.276641	6.70721	1.47545	0.558083
GO:0090557	establishment of endothelial intestinal barrier	2	818	8	21946	0.0334622	0.276641	6.70721	1.47545	0.558083
GO:0031340	positive regulation of vesicle fusion	2	818	8	21946	0.0334622	0.276641	6.70721	1.47545	0.558083
GO:0048660	regulation of smooth muscle cell proliferation	2	818	8	21946	0.0334622	0.276641	6.70721	1.47545	0.558083
GO:0071420	cellular response to histamine	2	818	8	21946	0.0334622	0.276641	6.70721	1.47545	0.558083
GO:0006972	hyperosmotic response	2	818	8	21946	0.0334622	0.276641	6.70721	1.47545	0.558083
GO:0061314	Notch signaling involved in heart development	2	818	8	21946	0.0334622	0.276641	6.70721	1.47545	0.558083
GO:0032816	positive regulation of natural killer cell activation	2	818	8	21946	0.0334622	0.276641	6.70721	1.47545	0.558083
GO:0051567	histone H3-K9 methylation	2	818	8	21946	0.0334622	0.276641	6.70721	1.47545	0.558083
GO:0072015	glomerular visceral epithelial cell development	2	818	8	21946	0.0334622	0.276641	6.70721	1.47545	0.558083
GO:0060411	cardiac septum morphogenesis	2	818	8	21946	0.0334622	0.276641	6.70721	1.47545	0.558083
GO:0048739	cardiac muscle fiber development	2	818	8	21946	0.0334622	0.276641	6.70721	1.47545	0.558083
GO:0045165	cell fate commitment	6	818	65	21946	0.0338403	0.276641	2.47651	1.47057	0.558083
GO:0009267	cellular response to starvation	5	818	49	21946	0.0351066	0.276641	2.73764	1.45461	0.558083
GO:0045665	negative regulation of neuron differentiation	6	818	66	21946	0.0360978	0.276641	2.43899	1.44252	0.558083
GO:0048589	developmental growth	4	818	34	21946	0.0366353	0.276641	3.15634	1.4361	0.558083
GO:0032320	positive regulation of Ras GTPase activity	4	818	34	21946	0.0366353	0.276641	3.15634	1.4361	0.558083
GO:0007163	establishment or maintenance of cell polarity	3	818	20	21946	0.0366654	0.276641	4.02433	1.43574	0.558083
GO:0097402	neuroblast migration	1	818	1	21946	0.0372733	0.276641	26.8289	1.4286	0.558083
GO:0051654	establishment of mitochondrion localization	1	818	1	21946	0.0372733	0.276641	26.8289	1.4286	0.558083
GO:0098746	fast, calcium ion-dependent exocytosis of neurotransmitter	1	818	1	21946	0.0372733	0.276641	26.8289	1.4286	0.558083
GO:0060143	positive regulation of syncytium formation by plasma membrane fusion	1	818	1	21946	0.0372733	0.276641	26.8289	1.4286	0.558083
GO:1903429	regulation of cell maturation	1	818	1	21946	0.0372733	0.276641	26.8289	1.4286	0.558083
GO:1903427	negative regulation of reactive oxygen species biosynthetic process	1	818	1	21946	0.0372733	0.276641	26.8289	1.4286	0.558083
GO:0002699	positive regulation of immune effector process	1	818	1	21946	0.0372733	0.276641	26.8289	1.4286	0.558083
GO:0071691	cardiac muscle thin filament assembly	1	818	1	21946	0.0372733	0.276641	26.8289	1.4286	0.558083
GO:0044089	positive regulation of cellular component biogenesis	1	818	1	21946	0.0372733	0.276641	26.8289	1.4286	0.558083
GO:0070367	negative regulation of hepatocyte differentiation	1	818	1	21946	0.0372733	0.276641	26.8289	1.4286	0.558083
GO:2000170	positive regulation of peptidyl-cysteine S-nitrosylation	1	818	1	21946	0.0372733	0.276641	26.8289	1.4286	0.558083
GO:1902519	response to docetaxel trihydrate	1	818	1	21946	0.0372733	0.276641	26.8289	1.4286	0.558083
GO:2001031	positive regulation of cellular glucuronidation	1	818	1	21946	0.0372733	0.276641	26.8289	1.4286	0.558083
GO:0036031	recruitment of mRNA capping enzyme to RNA polymerase II holoenzyme complex	1	818	1	21946	0.0372733	0.276641	26.8289	1.4286	0.558083
GO:0000080	mitotic G1 phase	1	818	1	21946	0.0372733	0.276641	26.8289	1.4286	0.558083
GO:0036022	limb joint morphogenesis	1	818	1	21946	0.0372733	0.276641	26.8289	1.4286	0.558083
GO:1903489	positive regulation of lactation	1	818	1	21946	0.0372733	0.276641	26.8289	1.4286	0.558083
GO:0006679	glucosylceramide biosynthetic process	1	818	1	21946	0.0372733	0.276641	26.8289	1.4286	0.558083
GO:1902165	regulation of intrinsic apoptotic signaling pathway in response to DNA damage by p53 class mediator	1	818	1	21946	0.0372733	0.276641	26.8289	1.4286	0.558083
GO:0003186	tricuspid valve morphogenesis	1	818	1	21946	0.0372733	0.276641	26.8289	1.4286	0.558083
GO:0052106	quorum sensing involved in interaction with host	1	818	1	21946	0.0372733	0.276641	26.8289	1.4286	0.558083
GO:2001076	positive regulation of metanephric ureteric bud development	1	818	1	21946	0.0372733	0.276641	26.8289	1.4286	0.558083
GO:0021813	cell-cell adhesion involved in neuronal-glial interactions involved in cerebral cortex radial glia guided migration	1	818	1	21946	0.0372733	0.276641	26.8289	1.4286	0.558083
GO:0006660	phosphatidylserine catabolic process	1	818	1	21946	0.0372733	0.276641	26.8289	1.4286	0.558083
GO:0036060	slit diaphragm assembly	1	818	1	21946	0.0372733	0.276641	26.8289	1.4286	0.558083
GO:0048050	post-embryonic eye morphogenesis	1	818	1	21946	0.0372733	0.276641	26.8289	1.4286	0.558083
GO:0031651	negative regulation of heat generation	1	818	1	21946	0.0372733	0.276641	26.8289	1.4286	0.558083
GO:0032980	keratinocyte activation	1	818	1	21946	0.0372733	0.276641	26.8289	1.4286	0.558083
GO:0006231	dTMP biosynthetic process	1	818	1	21946	0.0372733	0.276641	26.8289	1.4286	0.558083
GO:0010725	regulation of primitive erythrocyte differentiation	1	818	1	21946	0.0372733	0.276641	26.8289	1.4286	0.558083
GO:0010650	positive regulation of cell communication by electrical coupling	1	818	1	21946	0.0372733	0.276641	26.8289	1.4286	0.558083
GO:0070715	sodium-dependent organic cation transport	1	818	1	21946	0.0372733	0.276641	26.8289	1.4286	0.558083
GO:0031591	wybutosine biosynthetic process	1	818	1	21946	0.0372733	0.276641	26.8289	1.4286	0.558083
GO:0043114	regulation of vascular permeability	1	818	1	21946	0.0372733	0.276641	26.8289	1.4286	0.558083
GO:0032430	positive regulation of phospholipase A2 activity	1	818	1	21946	0.0372733	0.276641	26.8289	1.4286	0.558083
GO:0006147	guanine catabolic process	1	818	1	21946	0.0372733	0.276641	26.8289	1.4286	0.558083
GO:0090327	negative regulation of locomotion involved in locomotory behavior	1	818	1	21946	0.0372733	0.276641	26.8289	1.4286	0.558083
GO:1902073	positive regulation of hypoxia-inducible factor-1alpha signaling pathway	1	818	1	21946	0.0372733	0.276641	26.8289	1.4286	0.558083
GO:0032011	ARF protein signal transduction	1	818	1	21946	0.0372733	0.276641	26.8289	1.4286	0.558083
GO:0015918	sterol transport	1	818	1	21946	0.0372733	0.276641	26.8289	1.4286	0.558083
GO:2000614	positive regulation of thyroid-stimulating hormone secretion	1	818	1	21946	0.0372733	0.276641	26.8289	1.4286	0.558083
GO:0019088	immortalization of host cell by virus	1	818	1	21946	0.0372733	0.276641	26.8289	1.4286	0.558083
GO:2000655	negative regulation of cellular response to testosterone stimulus	1	818	1	21946	0.0372733	0.276641	26.8289	1.4286	0.558083
GO:2000666	negative regulation of interleukin-13 secretion	1	818	1	21946	0.0372733	0.276641	26.8289	1.4286	0.558083
GO:2000663	negative regulation of interleukin-5 secretion	1	818	1	21946	0.0372733	0.276641	26.8289	1.4286	0.558083
GO:0015964	diadenosine triphosphate catabolic process	1	818	1	21946	0.0372733	0.276641	26.8289	1.4286	0.558083
GO:0050433	regulation of catecholamine secretion	1	818	1	21946	0.0372733	0.276641	26.8289	1.4286	0.558083
GO:1903305	regulation of regulated secretory pathway	1	818	1	21946	0.0372733	0.276641	26.8289	1.4286	0.558083
GO:0051309	female meiosis chromosome separation	1	818	1	21946	0.0372733	0.276641	26.8289	1.4286	0.558083
GO:1900281	positive regulation of CD4-positive, alpha-beta T cell costimulation	1	818	1	21946	0.0372733	0.276641	26.8289	1.4286	0.558083
GO:0002347	response to tumor cell	1	818	1	21946	0.0372733	0.276641	26.8289	1.4286	0.558083
GO:0045058	T cell selection	1	818	1	21946	0.0372733	0.276641	26.8289	1.4286	0.558083
GO:1902891	negative regulation of root hair elongation	1	818	1	21946	0.0372733	0.276641	26.8289	1.4286	0.558083
GO:1902897	regulation of postsynaptic density protein 95 clustering	1	818	1	21946	0.0372733	0.276641	26.8289	1.4286	0.558083
GO:0050894	determination of affect	1	818	1	21946	0.0372733	0.276641	26.8289	1.4286	0.558083
GO:0060691	epithelial cell maturation involved in salivary gland development	1	818	1	21946	0.0372733	0.276641	26.8289	1.4286	0.558083
GO:0051389	inactivation of MAPKK activity	1	818	1	21946	0.0372733	0.276641	26.8289	1.4286	0.558083
GO:0097111	endoplasmic reticulum-Golgi intermediate compartment organization	1	818	1	21946	0.0372733	0.276641	26.8289	1.4286	0.558083
GO:0097115	neurexin clustering	1	818	1	21946	0.0372733	0.276641	26.8289	1.4286	0.558083
GO:0021993	initiation of neural tube closure	1	818	1	21946	0.0372733	0.276641	26.8289	1.4286	0.558083
GO:0006343	establishment of chromatin silencing	1	818	1	21946	0.0372733	0.276641	26.8289	1.4286	0.558083
GO:1902023	L-arginine transport	1	818	1	21946	0.0372733	0.276641	26.8289	1.4286	0.558083
GO:0070838	divalent metal ion transport	1	818	1	21946	0.0372733	0.276641	26.8289	1.4286	0.558083
GO:0032532	regulation of microvillus length	1	818	1	21946	0.0372733	0.276641	26.8289	1.4286	0.558083
GO:0016068	type I hypersensitivity	1	818	1	21946	0.0372733	0.276641	26.8289	1.4286	0.558083
GO:0060648	mammary gland bud morphogenesis	1	818	1	21946	0.0372733	0.276641	26.8289	1.4286	0.558083
GO:1901987	regulation of cell cycle phase transition	1	818	1	21946	0.0372733	0.276641	26.8289	1.4286	0.558083
GO:0048521	negative regulation of behavior	1	818	1	21946	0.0372733	0.276641	26.8289	1.4286	0.558083
GO:2000536	negative regulation of entry of bacterium into host cell	1	818	1	21946	0.0372733	0.276641	26.8289	1.4286	0.558083
GO:0010359	regulation of anion channel activity	1	818	1	21946	0.0372733	0.276641	26.8289	1.4286	0.558083
GO:0060658	nipple morphogenesis	1	818	1	21946	0.0372733	0.276641	26.8289	1.4286	0.558083
GO:0050865	regulation of cell activation	1	818	1	21946	0.0372733	0.276641	26.8289	1.4286	0.558083
GO:0035644	phosphoanandamide dephosphorylation	1	818	1	21946	0.0372733	0.276641	26.8289	1.4286	0.558083
GO:2000568	positive regulation of memory T cell activation	1	818	1	21946	0.0372733	0.276641	26.8289	1.4286	0.558083
GO:0000117	regulation of transcription involved in G2/M transition of mitotic cell cycle	1	818	1	21946	0.0372733	0.276641	26.8289	1.4286	0.558083
GO:0033037	polysaccharide localization	1	818	1	21946	0.0372733	0.276641	26.8289	1.4286	0.558083
GO:2000572	positive regulation of interleukin-4-dependent isotype switching to IgE isotypes	1	818	1	21946	0.0372733	0.276641	26.8289	1.4286	0.558083
GO:0042938	dipeptide transport	1	818	1	21946	0.0372733	0.276641	26.8289	1.4286	0.558083
GO:0097640	L-ornithine import across plasma membrane	1	818	1	21946	0.0372733	0.276641	26.8289	1.4286	0.558083
GO:0070169	positive regulation of biomineral tissue development	1	818	1	21946	0.0372733	0.276641	26.8289	1.4286	0.558083
GO:0046078	dUMP metabolic process	1	818	1	21946	0.0372733	0.276641	26.8289	1.4286	0.558083
GO:2001229	negative regulation of response to gamma radiation	1	818	1	21946	0.0372733	0.276641	26.8289	1.4286	0.558083
GO:0010092	specification of organ identity	1	818	1	21946	0.0372733	0.276641	26.8289	1.4286	0.558083
GO:0070175	positive regulation of enamel mineralization	1	818	1	21946	0.0372733	0.276641	26.8289	1.4286	0.558083
GO:0097638	L-arginine import across plasma membrane	1	818	1	21946	0.0372733	0.276641	26.8289	1.4286	0.558083
GO:0097639	L-lysine import across plasma membrane	1	818	1	21946	0.0372733	0.276641	26.8289	1.4286	0.558083
GO:0072302	negative regulation of metanephric glomerular mesangial cell proliferation	1	818	1	21946	0.0372733	0.276641	26.8289	1.4286	0.558083
GO:2001246	negative regulation of phosphatidylcholine biosynthetic process	1	818	1	21946	0.0372733	0.276641	26.8289	1.4286	0.558083
GO:1900100	positive regulation of plasma cell differentiation	1	818	1	21946	0.0372733	0.276641	26.8289	1.4286	0.558083
GO:0048692	negative regulation of axon extension involved in regeneration	1	818	1	21946	0.0372733	0.276641	26.8289	1.4286	0.558083
GO:0009946	proximal/distal axis specification	1	818	1	21946	0.0372733	0.276641	26.8289	1.4286	0.558083
GO:0098586	cellular response to virus	1	818	1	21946	0.0372733	0.276641	26.8289	1.4286	0.558083
GO:0006422	aspartyl-tRNA aminoacylation	1	818	1	21946	0.0372733	0.276641	26.8289	1.4286	0.558083
GO:0051459	regulation of corticotropin secretion	1	818	1	21946	0.0372733	0.276641	26.8289	1.4286	0.558083
GO:0051460	negative regulation of corticotropin secretion	1	818	1	21946	0.0372733	0.276641	26.8289	1.4286	0.558083
GO:0007321	sperm displacement	1	818	1	21946	0.0372733	0.276641	26.8289	1.4286	0.558083
GO:0016267	O-glycan processing, core 1	1	818	1	21946	0.0372733	0.276641	26.8289	1.4286	0.558083
GO:0035712	T-helper 2 cell activation	1	818	1	21946	0.0372733	0.276641	26.8289	1.4286	0.558083
GO:0035713	response to nitrogen dioxide	1	818	1	21946	0.0372733	0.276641	26.8289	1.4286	0.558083
GO:0035714	cellular response to nitrogen dioxide	1	818	1	21946	0.0372733	0.276641	26.8289	1.4286	0.558083
GO:0035709	memory T cell activation	1	818	1	21946	0.0372733	0.276641	26.8289	1.4286	0.558083
GO:0071838	cell proliferation in bone marrow	1	818	1	21946	0.0372733	0.276641	26.8289	1.4286	0.558083
GO:0031393	negative regulation of prostaglandin biosynthetic process	1	818	1	21946	0.0372733	0.276641	26.8289	1.4286	0.558083
GO:0086052	membrane repolarization during SA node cell action potential	1	818	1	21946	0.0372733	0.276641	26.8289	1.4286	0.558083
GO:0035783	CD4-positive, alpha-beta T cell costimulation	1	818	1	21946	0.0372733	0.276641	26.8289	1.4286	0.558083
GO:0060300	regulation of cytokine activity	1	818	1	21946	0.0372733	0.276641	26.8289	1.4286	0.558083
GO:0060304	regulation of phosphatidylinositol dephosphorylation	1	818	1	21946	0.0372733	0.276641	26.8289	1.4286	0.558083
GO:0061621	canonical glycolysis	1	818	1	21946	0.0372733	0.276641	26.8289	1.4286	0.558083
GO:2000425	regulation of apoptotic cell clearance	1	818	1	21946	0.0372733	0.276641	26.8289	1.4286	0.558083
GO:0014844	myoblast proliferation involved in skeletal muscle regeneration	1	818	1	21946	0.0372733	0.276641	26.8289	1.4286	0.558083
GO:0044252	negative regulation of multicellular organismal metabolic process	1	818	1	21946	0.0372733	0.276641	26.8289	1.4286	0.558083
GO:0090128	regulation of synapse maturation	1	818	1	21946	0.0372733	0.276641	26.8289	1.4286	0.558083
GO:0060731	positive regulation of intestinal epithelial structure maintenance	1	818	1	21946	0.0372733	0.276641	26.8289	1.4286	0.558083
GO:1900011	negative regulation of corticotropin-releasing hormone receptor activity	1	818	1	21946	0.0372733	0.276641	26.8289	1.4286	0.558083
GO:0060007	linear vestibuloocular reflex	1	818	1	21946	0.0372733	0.276641	26.8289	1.4286	0.558083
GO:0034178	toll-like receptor 13 signaling pathway	1	818	1	21946	0.0372733	0.276641	26.8289	1.4286	0.558083
GO:0061358	negative regulation of Wnt protein secretion	1	818	1	21946	0.0372733	0.276641	26.8289	1.4286	0.558083
GO:0006948	induction by virus of host cell-cell fusion	1	818	1	21946	0.0372733	0.276641	26.8289	1.4286	0.558083
GO:0051977	lysophospholipid transport	1	818	1	21946	0.0372733	0.276641	26.8289	1.4286	0.558083
GO:0072431	signal transduction involved in mitotic G1 DNA damage checkpoint	1	818	1	21946	0.0372733	0.276641	26.8289	1.4286	0.558083
GO:0046177	D-gluconate catabolic process	1	818	1	21946	0.0372733	0.276641	26.8289	1.4286	0.558083
GO:1903141	negative regulation of establishment of endothelial barrier	1	818	1	21946	0.0372733	0.276641	26.8289	1.4286	0.558083
GO:0072087	renal vesicle development	1	818	1	21946	0.0372733	0.276641	26.8289	1.4286	0.558083
GO:0060096	serotonin secretion, neurotransmission	1	818	1	21946	0.0372733	0.276641	26.8289	1.4286	0.558083
GO:0032812	positive regulation of epinephrine secretion	1	818	1	21946	0.0372733	0.276641	26.8289	1.4286	0.558083
GO:0032817	regulation of natural killer cell proliferation	1	818	1	21946	0.0372733	0.276641	26.8289	1.4286	0.558083
GO:0097338	response to clozapine	1	818	1	21946	0.0372733	0.276641	26.8289	1.4286	0.558083
GO:1903597	negative regulation of gap junction assembly	1	818	1	21946	0.0372733	0.276641	26.8289	1.4286	0.558083
GO:1903118	urate homeostasis	1	818	1	21946	0.0372733	0.276641	26.8289	1.4286	0.558083
GO:0032857	activation of ARF GTPase activity	1	818	1	21946	0.0372733	0.276641	26.8289	1.4286	0.558083
GO:0051097	negative regulation of helicase activity	1	818	1	21946	0.0372733	0.276641	26.8289	1.4286	0.558083
GO:0038098	sequestering of BMP from receptor via BMP binding	1	818	1	21946	0.0372733	0.276641	26.8289	1.4286	0.558083
GO:0007356	thorax and anterior abdomen determination	1	818	1	21946	0.0372733	0.276641	26.8289	1.4286	0.558083
GO:1900827	positive regulation of membrane depolarization during cardiac muscle cell action potential	1	818	1	21946	0.0372733	0.276641	26.8289	1.4286	0.558083
GO:2000706	negative regulation of dense core granule biogenesis	1	818	1	21946	0.0372733	0.276641	26.8289	1.4286	0.558083
GO:2000707	positive regulation of dense core granule biogenesis	1	818	1	21946	0.0372733	0.276641	26.8289	1.4286	0.558083
GO:0045607	regulation of auditory receptor cell differentiation	1	818	1	21946	0.0372733	0.276641	26.8289	1.4286	0.558083
GO:1903047	mitotic cell cycle process	1	818	1	21946	0.0372733	0.276641	26.8289	1.4286	0.558083
GO:1903045	neural crest cell migration involved in sympathetic nervous system development	1	818	1	21946	0.0372733	0.276641	26.8289	1.4286	0.558083
GO:0002932	tendon sheath development	1	818	1	21946	0.0372733	0.276641	26.8289	1.4286	0.558083
GO:0021685	cerebellar granular layer structural organization	1	818	1	21946	0.0372733	0.276641	26.8289	1.4286	0.558083
GO:0021693	cerebellar Purkinje cell layer structural organization	1	818	1	21946	0.0372733	0.276641	26.8289	1.4286	0.558083
GO:2000740	negative regulation of mesenchymal stem cell differentiation	1	818	1	21946	0.0372733	0.276641	26.8289	1.4286	0.558083
GO:0060400	negative regulation of growth hormone receptor signaling pathway	1	818	1	21946	0.0372733	0.276641	26.8289	1.4286	0.558083
GO:0048789	cytoskeletal matrix organization at active zone	1	818	1	21946	0.0372733	0.276641	26.8289	1.4286	0.558083
GO:2000302	positive regulation of synaptic vesicle exocytosis	1	818	1	21946	0.0372733	0.276641	26.8289	1.4286	0.558083
GO:2000798	negative regulation of amniotic stem cell differentiation	1	818	1	21946	0.0372733	0.276641	26.8289	1.4286	0.558083
GO:0015868	purine ribonucleotide transport	1	818	1	21946	0.0372733	0.276641	26.8289	1.4286	0.558083
GO:0009187	cyclic nucleotide metabolic process	1	818	1	21946	0.0372733	0.276641	26.8289	1.4286	0.558083
GO:0043056	forward locomotion	1	818	1	21946	0.0372733	0.276641	26.8289	1.4286	0.558083
GO:0045234	protein palmitoleylation	1	818	1	21946	0.0372733	0.276641	26.8289	1.4286	0.558083
GO:0001568	blood vessel development	6	818	67	21946	0.0384497	0.28455	2.40258	1.41511	0.545841
GO:0050890	cognition	4	818	35	21946	0.0401851	0.287456	3.06615	1.39593	0.541429
GO:0007188	adenylate cyclase-modulating G-protein coupled receptor signaling pathway	4	818	35	21946	0.0401851	0.287456	3.06615	1.39593	0.541429
GO:0016337	single organismal cell-cell adhesion	8	818	104	21946	0.040546	0.287456	2.06376	1.39205	0.541429
GO:0001843	neural tube closure	7	818	86	21946	0.0414114	0.287456	2.18374	1.38288	0.541429
GO:0000188	inactivation of MAPK activity	3	818	21	21946	0.0416247	0.287456	3.83269	1.38065	0.541429
GO:0060716	labyrinthine layer blood vessel development	3	818	21	21946	0.0416247	0.287456	3.83269	1.38065	0.541429
GO:2000273	positive regulation of receptor activity	3	818	21	21946	0.0416247	0.287456	3.83269	1.38065	0.541429
GO:0035902	response to immobilization stress	3	818	21	21946	0.0416247	0.287456	3.83269	1.38065	0.541429
GO:0042104	positive regulation of activated T cell proliferation	3	818	21	21946	0.0416247	0.287456	3.83269	1.38065	0.541429
GO:1902166	negative regulation of intrinsic apoptotic signaling pathway in response to DNA damage by p53 class mediator	2	818	9	21946	0.0419766	0.287456	5.96197	1.37699	0.541429
GO:0006163	purine nucleotide metabolic process	2	818	9	21946	0.0419766	0.287456	5.96197	1.37699	0.541429
GO:0034616	response to laminar fluid shear stress	2	818	9	21946	0.0419766	0.287456	5.96197	1.37699	0.541429
GO:0010224	response to UV-B	2	818	9	21946	0.0419766	0.287456	5.96197	1.37699	0.541429
GO:0060997	dendritic spine morphogenesis	2	818	9	21946	0.0419766	0.287456	5.96197	1.37699	0.541429
GO:0060541	respiratory system development	2	818	9	21946	0.0419766	0.287456	5.96197	1.37699	0.541429
GO:0070493	thrombin receptor signaling pathway	2	818	9	21946	0.0419766	0.287456	5.96197	1.37699	0.541429
GO:0034332	adherens junction organization	2	818	9	21946	0.0419766	0.287456	5.96197	1.37699	0.541429
GO:0050805	negative regulation of synaptic transmission	2	818	9	21946	0.0419766	0.287456	5.96197	1.37699	0.541429
GO:0051489	regulation of filopodium assembly	2	818	9	21946	0.0419766	0.287456	5.96197	1.37699	0.541429
GO:0014883	transition between fast and slow fiber	2	818	9	21946	0.0419766	0.287456	5.96197	1.37699	0.541429
GO:2000270	negative regulation of fibroblast apoptotic process	2	818	9	21946	0.0419766	0.287456	5.96197	1.37699	0.541429
GO:0060013	righting reflex	2	818	9	21946	0.0419766	0.287456	5.96197	1.37699	0.541429
GO:0032836	glomerular basement membrane development	2	818	9	21946	0.0419766	0.287456	5.96197	1.37699	0.541429
GO:0032835	glomerulus development	2	818	9	21946	0.0419766	0.287456	5.96197	1.37699	0.541429
GO:0055001	muscle cell development	2	818	9	21946	0.0419766	0.287456	5.96197	1.37699	0.541429
GO:0015833	peptide transport	2	818	9	21946	0.0419766	0.287456	5.96197	1.37699	0.541429
GO:2000773	negative regulation of cellular senescence	2	818	9	21946	0.0419766	0.287456	5.96197	1.37699	0.541429
GO:0060840	artery development	2	818	9	21946	0.0419766	0.287456	5.96197	1.37699	0.541429
GO:0016311	dephosphorylation	13	818	204	21946	0.0425992	0.290943	1.70968	1.3706	0.536191
GO:0032956	regulation of actin cytoskeleton organization	4	818	36	21946	0.0439235	0.298401	2.98098	1.3573	0.5252
GO:0005977	glycogen metabolic process	4	818	36	21946	0.0439235	0.298401	2.98098	1.3573	0.5252
GO:0048010	vascular endothelial growth factor receptor signaling pathway	3	818	22	21946	0.0469023	0.31002	3.65848	1.32881	0.50861
GO:0014065	phosphatidylinositol 3-kinase signaling	3	818	22	21946	0.0469023	0.31002	3.65848	1.32881	0.50861
GO:0002053	positive regulation of mesenchymal cell proliferation	4	818	37	21946	0.0478502	0.31002	2.90042	1.32012	0.50861
GO:0006357	regulation of transcription from RNA polymerase II promoter	23	818	426	21946	0.0494408	0.31002	1.44851	1.30591	0.50861
GO:0010656	negative regulation of muscle cell apoptotic process	2	818	10	21946	0.0511991	0.31002	5.36577	1.29074	0.50861
GO:0045722	positive regulation of gluconeogenesis	2	818	10	21946	0.0511991	0.31002	5.36577	1.29074	0.50861
GO:0010225	response to UV-C	2	818	10	21946	0.0511991	0.31002	5.36577	1.29074	0.50861
GO:0016559	peroxisome fission	2	818	10	21946	0.0511991	0.31002	5.36577	1.29074	0.50861
GO:0006283	transcription-coupled nucleotide-excision repair	2	818	10	21946	0.0511991	0.31002	5.36577	1.29074	0.50861
GO:0003334	keratinocyte development	2	818	10	21946	0.0511991	0.31002	5.36577	1.29074	0.50861
GO:0090136	epithelial cell-cell adhesion	2	818	10	21946	0.0511991	0.31002	5.36577	1.29074	0.50861
GO:0071872	cellular response to epinephrine stimulus	2	818	10	21946	0.0511991	0.31002	5.36577	1.29074	0.50861
GO:0045651	positive regulation of macrophage differentiation	2	818	10	21946	0.0511991	0.31002	5.36577	1.29074	0.50861
GO:0048703	embryonic viscerocranium morphogenesis	2	818	10	21946	0.0511991	0.31002	5.36577	1.29074	0.50861
GO:0031065	positive regulation of histone deacetylation	2	818	10	21946	0.0511991	0.31002	5.36577	1.29074	0.50861
GO:0043010	camera-type eye development	6	818	72	21946	0.0516548	0.31002	2.23574	1.28689	0.50861
GO:0048041	focal adhesion assembly	3	818	23	21946	0.0524918	0.31002	3.49942	1.27991	0.50861
GO:0010765	positive regulation of sodium ion transport	3	818	23	21946	0.0524918	0.31002	3.49942	1.27991	0.50861
GO:0090103	cochlea morphogenesis	3	818	23	21946	0.0524918	0.31002	3.49942	1.27991	0.50861
GO:0042098	T cell proliferation	3	818	23	21946	0.0524918	0.31002	3.49942	1.27991	0.50861
GO:0019835	cytolysis	3	818	23	21946	0.0524918	0.31002	3.49942	1.27991	0.50861
GO:0006366	transcription from RNA polymerase II promoter	29	818	567	21946	0.0540442	0.31002	1.3722	1.26725	0.50861
GO:0043410	positive regulation of MAPK cascade	7	818	92	21946	0.0560102	0.31002	2.04133	1.25173	0.50861
GO:0021987	cerebral cortex development	5	818	56	21946	0.0570676	0.31002	2.39543	1.24361	0.50861
GO:0042632	cholesterol homeostasis	5	818	56	21946	0.0570676	0.31002	2.39543	1.24361	0.50861
GO:0050804	regulation of synaptic transmission	3	818	24	21946	0.058386	0.31002	3.35361	1.23369	0.50861
GO:0014003	oligodendrocyte development	3	818	24	21946	0.058386	0.31002	3.35361	1.23369	0.50861
GO:0046580	negative regulation of Ras protein signal transduction	3	818	24	21946	0.058386	0.31002	3.35361	1.23369	0.50861
GO:0043044	ATP-dependent chromatin remodeling	3	818	24	21946	0.058386	0.31002	3.35361	1.23369	0.50861
GO:1902176	negative regulation of oxidative stress-induced intrinsic apoptotic signaling pathway	2	818	11	21946	0.0610651	0.31002	4.87797	1.21421	0.50861
GO:0045822	negative regulation of heart contraction	2	818	11	21946	0.0610651	0.31002	4.87797	1.21421	0.50861
GO:0006241	CTP biosynthetic process	2	818	11	21946	0.0610651	0.31002	4.87797	1.21421	0.50861
GO:0006228	UTP biosynthetic process	2	818	11	21946	0.0610651	0.31002	4.87797	1.21421	0.50861
GO:0046628	positive regulation of insulin receptor signaling pathway	2	818	11	21946	0.0610651	0.31002	4.87797	1.21421	0.50861
GO:0006183	GTP biosynthetic process	2	818	11	21946	0.0610651	0.31002	4.87797	1.21421	0.50861
GO:0050708	regulation of protein secretion	2	818	11	21946	0.0610651	0.31002	4.87797	1.21421	0.50861
GO:0010801	negative regulation of peptidyl-threonine phosphorylation	2	818	11	21946	0.0610651	0.31002	4.87797	1.21421	0.50861
GO:0045995	regulation of embryonic development	2	818	11	21946	0.0610651	0.31002	4.87797	1.21421	0.50861
GO:0060740	prostate gland epithelium morphogenesis	2	818	11	21946	0.0610651	0.31002	4.87797	1.21421	0.50861
GO:1900006	positive regulation of dendrite development	2	818	11	21946	0.0610651	0.31002	4.87797	1.21421	0.50861
GO:0032330	regulation of chondrocyte differentiation	2	818	11	21946	0.0610651	0.31002	4.87797	1.21421	0.50861
GO:0048711	positive regulation of astrocyte differentiation	2	818	11	21946	0.0610651	0.31002	4.87797	1.21421	0.50861
GO:0006470	protein dephosphorylation	9	818	134	21946	0.06345	0.31002	1.80194	1.19757	0.50861
GO:0032880	regulation of protein localization	5	818	58	21946	0.0645123	0.31002	2.31283	1.19036	0.50861
GO:0001816	cytokine production	3	818	25	21946	0.0645771	0.31002	3.21946	1.18992	0.50861
GO:2000378	negative regulation of reactive oxygen species metabolic process	3	818	25	21946	0.0645771	0.31002	3.21946	1.18992	0.50861
GO:0043001	Golgi to plasma membrane protein transport	3	818	25	21946	0.0645771	0.31002	3.21946	1.18992	0.50861
GO:0001764	neuron migration	8	818	115	21946	0.0657982	0.31002	1.86635	1.18179	0.50861
GO:0030182	neuron differentiation	8	818	115	21946	0.0657982	0.31002	1.86635	1.18179	0.50861
GO:2001237	negative regulation of extrinsic apoptotic signaling pathway	4	818	42	21946	0.0702733	0.31002	2.55513	1.15321	0.50861
GO:0007010	cytoskeleton organization	7	818	97	21946	0.0703418	0.31002	1.9361	1.15279	0.50861
GO:0000226	microtubule cytoskeleton organization	6	818	78	21946	0.0707471	0.31002	2.06376	1.15029	0.50861
GO:0061098	positive regulation of protein tyrosine kinase activity	3	818	26	21946	0.0710563	0.31002	3.09564	1.1484	0.50861
GO:0018022	peptidyl-lysine methylation	3	818	26	21946	0.0710563	0.31002	3.09564	1.1484	0.50861
GO:0006928	cellular component movement	3	818	26	21946	0.0710563	0.31002	3.09564	1.1484	0.50861
GO:0050771	negative regulation of axonogenesis	2	818	12	21946	0.0715139	0.31002	4.47148	1.14561	0.50861
GO:2000178	negative regulation of neural precursor cell proliferation	2	818	12	21946	0.0715139	0.31002	4.47148	1.14561	0.50861
GO:0031643	positive regulation of myelination	2	818	12	21946	0.0715139	0.31002	4.47148	1.14561	0.50861
GO:0046621	negative regulation of organ growth	2	818	12	21946	0.0715139	0.31002	4.47148	1.14561	0.50861
GO:0045779	negative regulation of bone resorption	2	818	12	21946	0.0715139	0.31002	4.47148	1.14561	0.50861
GO:0045793	positive regulation of cell size	2	818	12	21946	0.0715139	0.31002	4.47148	1.14561	0.50861
GO:0030238	male sex determination	2	818	12	21946	0.0715139	0.31002	4.47148	1.14561	0.50861
GO:0035518	histone H2A monoubiquitination	2	818	12	21946	0.0715139	0.31002	4.47148	1.14561	0.50861
GO:0060999	positive regulation of dendritic spine development	2	818	12	21946	0.0715139	0.31002	4.47148	1.14561	0.50861
GO:0035589	G-protein coupled purinergic nucleotide receptor signaling pathway	2	818	12	21946	0.0715139	0.31002	4.47148	1.14561	0.50861
GO:0060252	positive regulation of glial cell proliferation	2	818	12	21946	0.0715139	0.31002	4.47148	1.14561	0.50861
GO:0048268	clathrin coat assembly	2	818	12	21946	0.0715139	0.31002	4.47148	1.14561	0.50861
GO:0032700	negative regulation of interleukin-17 production	2	818	12	21946	0.0715139	0.31002	4.47148	1.14561	0.50861
GO:0051481	negative regulation of cytosolic calcium ion concentration	2	818	12	21946	0.0715139	0.31002	4.47148	1.14561	0.50861
GO:0014898	cardiac muscle hypertrophy in response to stress	2	818	12	21946	0.0715139	0.31002	4.47148	1.14561	0.50861
GO:0060088	auditory receptor cell stereocilium organization	2	818	12	21946	0.0715139	0.31002	4.47148	1.14561	0.50861
GO:0043518	negative regulation of DNA damage response, signal transduction by p53 class mediator	2	818	12	21946	0.0715139	0.31002	4.47148	1.14561	0.50861
GO:0044782	cilium organization	2	818	12	21946	0.0715139	0.31002	4.47148	1.14561	0.50861
GO:0055089	fatty acid homeostasis	2	818	12	21946	0.0715139	0.31002	4.47148	1.14561	0.50861
GO:0006351	transcription, DNA-templated	81	818	1851	21946	0.0724188	0.31002	1.17403	1.14015	0.50861
GO:0030334	regulation of cell migration	5	818	60	21946	0.0724746	0.31002	2.23574	1.13981	0.50861
GO:0071300	cellular response to retinoic acid	5	818	60	21946	0.0724746	0.31002	2.23574	1.13981	0.50861
GO:0035690	cellular response to drug	5	818	60	21946	0.0724746	0.31002	2.23574	1.13981	0.50861
GO:0060125	negative regulation of growth hormone secretion	1	818	2	21946	0.073159	0.31002	13.4144	1.13573	0.50861
GO:0051660	establishment of centrosome localization	1	818	2	21946	0.073159	0.31002	13.4144	1.13573	0.50861
GO:0061418	regulation of transcription from RNA polymerase II promoter in response to hypoxia	1	818	2	21946	0.073159	0.31002	13.4144	1.13573	0.50861
GO:0003170	heart valve development	1	818	2	21946	0.073159	0.31002	13.4144	1.13573	0.50861
GO:0003171	atrioventricular valve development	1	818	2	21946	0.073159	0.31002	13.4144	1.13573	0.50861
GO:0021836	chemorepulsion involved in postnatal olfactory bulb interneuron migration	1	818	2	21946	0.073159	0.31002	13.4144	1.13573	0.50861
GO:0006688	glycosphingolipid biosynthetic process	1	818	2	21946	0.073159	0.31002	13.4144	1.13573	0.50861
GO:0043624	cellular protein complex disassembly	1	818	2	21946	0.073159	0.31002	13.4144	1.13573	0.50861
GO:0031635	adenylate cyclase-inhibiting opioid receptor signaling pathway	1	818	2	21946	0.073159	0.31002	13.4144	1.13573	0.50861
GO:0007527	adult somatic muscle development	1	818	2	21946	0.073159	0.31002	13.4144	1.13573	0.50861
GO:0097499	protein localization to nonmotile primary cilium	1	818	2	21946	0.073159	0.31002	13.4144	1.13573	0.50861
GO:0003156	regulation of organ formation	1	818	2	21946	0.073159	0.31002	13.4144	1.13573	0.50861
GO:0021852	pyramidal neuron migration	1	818	2	21946	0.073159	0.31002	13.4144	1.13573	0.50861
GO:0072172	mesonephric tubule formation	1	818	2	21946	0.073159	0.31002	13.4144	1.13573	0.50861
GO:0072166	posterior mesonephric tubule development	1	818	2	21946	0.073159	0.31002	13.4144	1.13573	0.50861
GO:0060177	regulation of angiotensin metabolic process	1	818	2	21946	0.073159	0.31002	13.4144	1.13573	0.50861
GO:0010721	negative regulation of cell development	1	818	2	21946	0.073159	0.31002	13.4144	1.13573	0.50861
GO:0021778	oligodendrocyte cell fate specification	1	818	2	21946	0.073159	0.31002	13.4144	1.13573	0.50861
GO:0021781	glial cell fate commitment	1	818	2	21946	0.073159	0.31002	13.4144	1.13573	0.50861
GO:0010636	positive regulation of mitochondrial fusion	1	818	2	21946	0.073159	0.31002	13.4144	1.13573	0.50861
GO:0045796	negative regulation of intestinal cholesterol absorption	1	818	2	21946	0.073159	0.31002	13.4144	1.13573	0.50861
GO:0032490	detection of molecule of bacterial origin	1	818	2	21946	0.073159	0.31002	13.4144	1.13573	0.50861
GO:0032487	regulation of Rap protein signal transduction	1	818	2	21946	0.073159	0.31002	13.4144	1.13573	0.50861
GO:0035992	tendon formation	1	818	2	21946	0.073159	0.31002	13.4144	1.13573	0.50861
GO:0043558	regulation of translational initiation in response to stress	1	818	2	21946	0.073159	0.31002	13.4144	1.13573	0.50861
GO:0045761	regulation of adenylate cyclase activity	1	818	2	21946	0.073159	0.31002	13.4144	1.13573	0.50861
GO:0032042	mitochondrial DNA metabolic process	1	818	2	21946	0.073159	0.31002	13.4144	1.13573	0.50861
GO:0010265	SCF complex assembly	1	818	2	21946	0.073159	0.31002	13.4144	1.13573	0.50861
GO:0009258	10-formyltetrahydrofolate catabolic process	1	818	2	21946	0.073159	0.31002	13.4144	1.13573	0.50861
GO:0009262	deoxyribonucleotide metabolic process	1	818	2	21946	0.073159	0.31002	13.4144	1.13573	0.50861
GO:0033353	S-adenosylmethionine cycle	1	818	2	21946	0.073159	0.31002	13.4144	1.13573	0.50861
GO:0050748	negative regulation of lipoprotein metabolic process	1	818	2	21946	0.073159	0.31002	13.4144	1.13573	0.50861
GO:0002684	positive regulation of immune system process	1	818	2	21946	0.073159	0.31002	13.4144	1.13573	0.50861
GO:0048840	otolith development	1	818	2	21946	0.073159	0.31002	13.4144	1.13573	0.50861
GO:0046671	negative regulation of retinal cell programmed cell death	1	818	2	21946	0.073159	0.31002	13.4144	1.13573	0.50861
GO:0036438	maintenance of lens transparency	1	818	2	21946	0.073159	0.31002	13.4144	1.13573	0.50861
GO:0032071	regulation of endodeoxyribonuclease activity	1	818	2	21946	0.073159	0.31002	13.4144	1.13573	0.50861
GO:0046683	response to organophosphorus	1	818	2	21946	0.073159	0.31002	13.4144	1.13573	0.50861
GO:2000479	regulation of cAMP-dependent protein kinase activity	1	818	2	21946	0.073159	0.31002	13.4144	1.13573	0.50861
GO:1902443	negative regulation of ripoptosome assembly involved in necroptotic process	1	818	2	21946	0.073159	0.31002	13.4144	1.13573	0.50861
GO:0035261	external genitalia morphogenesis	1	818	2	21946	0.073159	0.31002	13.4144	1.13573	0.50861
GO:0035262	gonad morphogenesis	1	818	2	21946	0.073159	0.31002	13.4144	1.13573	0.50861
GO:0060209	estrus	1	818	2	21946	0.073159	0.31002	13.4144	1.13573	0.50861
GO:0072660	maintenance of protein location in plasma membrane	1	818	2	21946	0.073159	0.31002	13.4144	1.13573	0.50861
GO:0070483	detection of hypoxia	1	818	2	21946	0.073159	0.31002	13.4144	1.13573	0.50861
GO:0046386	deoxyribose phosphate catabolic process	1	818	2	21946	0.073159	0.31002	13.4144	1.13573	0.50861
GO:0071338	positive regulation of hair follicle cell proliferation	1	818	2	21946	0.073159	0.31002	13.4144	1.13573	0.50861
GO:0035295	tube development	1	818	2	21946	0.073159	0.31002	13.4144	1.13573	0.50861
GO:1900244	positive regulation of synaptic vesicle endocytosis	1	818	2	21946	0.073159	0.31002	13.4144	1.13573	0.50861
GO:0090083	regulation of inclusion body assembly	1	818	2	21946	0.073159	0.31002	13.4144	1.13573	0.50861
GO:0030832	regulation of actin filament length	1	818	2	21946	0.073159	0.31002	13.4144	1.13573	0.50861
GO:1902033	regulation of hematopoietic stem cell proliferation	1	818	2	21946	0.073159	0.31002	13.4144	1.13573	0.50861
GO:0010827	regulation of glucose transport	1	818	2	21946	0.073159	0.31002	13.4144	1.13573	0.50861
GO:0006788	heme oxidation	1	818	2	21946	0.073159	0.31002	13.4144	1.13573	0.50861
GO:0021514	ventral spinal cord interneuron differentiation	1	818	2	21946	0.073159	0.31002	13.4144	1.13573	0.50861
GO:1903352	L-ornithine transmembrane transport	1	818	2	21946	0.073159	0.31002	13.4144	1.13573	0.50861
GO:0021965	spinal cord ventral commissure morphogenesis	1	818	2	21946	0.073159	0.31002	13.4144	1.13573	0.50861
GO:0010758	regulation of macrophage chemotaxis	1	818	2	21946	0.073159	0.31002	13.4144	1.13573	0.50861
GO:0071709	membrane assembly	1	818	2	21946	0.073159	0.31002	13.4144	1.13573	0.50861
GO:0035617	stress granule disassembly	1	818	2	21946	0.073159	0.31002	13.4144	1.13573	0.50861
GO:0060633	negative regulation of transcription initiation from RNA polymerase II promoter	1	818	2	21946	0.073159	0.31002	13.4144	1.13573	0.50861
GO:2000525	positive regulation of T cell costimulation	1	818	2	21946	0.073159	0.31002	13.4144	1.13573	0.50861
GO:0035669	TRAM-dependent toll-like receptor 4 signaling pathway	1	818	2	21946	0.073159	0.31002	13.4144	1.13573	0.50861
GO:0060661	submandibular salivary gland formation	1	818	2	21946	0.073159	0.31002	13.4144	1.13573	0.50861
GO:0071314	cellular response to cocaine	1	818	2	21946	0.073159	0.31002	13.4144	1.13573	0.50861
GO:0002314	germinal center B cell differentiation	1	818	2	21946	0.073159	0.31002	13.4144	1.13573	0.50861
GO:0034381	plasma lipoprotein particle clearance	1	818	2	21946	0.073159	0.31002	13.4144	1.13573	0.50861
GO:2000570	positive regulation of T-helper 2 cell activation	1	818	2	21946	0.073159	0.31002	13.4144	1.13573	0.50861
GO:0002790	peptide secretion	1	818	2	21946	0.073159	0.31002	13.4144	1.13573	0.50861
GO:0002001	renin secretion into blood stream	1	818	2	21946	0.073159	0.31002	13.4144	1.13573	0.50861
GO:0071000	response to magnetism	1	818	2	21946	0.073159	0.31002	13.4144	1.13573	0.50861
GO:0048259	regulation of receptor-mediated endocytosis	1	818	2	21946	0.073159	0.31002	13.4144	1.13573	0.50861
GO:0046092	deoxycytidine metabolic process	1	818	2	21946	0.073159	0.31002	13.4144	1.13573	0.50861
GO:0050992	dimethylallyl diphosphate biosynthetic process	1	818	2	21946	0.073159	0.31002	13.4144	1.13573	0.50861
GO:0014016	neuroblast differentiation	1	818	2	21946	0.073159	0.31002	13.4144	1.13573	0.50861
GO:0006409	tRNA export from nucleus	1	818	2	21946	0.073159	0.31002	13.4144	1.13573	0.50861
GO:0002019	regulation of renal output by angiotensin	1	818	2	21946	0.073159	0.31002	13.4144	1.13573	0.50861
GO:0051878	lateral element assembly	1	818	2	21946	0.073159	0.31002	13.4144	1.13573	0.50861
GO:1903244	positive regulation of cardiac muscle hypertrophy in response to stress	1	818	2	21946	0.073159	0.31002	13.4144	1.13573	0.50861
GO:0097252	oligodendrocyte apoptotic process	1	818	2	21946	0.073159	0.31002	13.4144	1.13573	0.50861
GO:0046909	intermembrane transport	1	818	2	21946	0.073159	0.31002	13.4144	1.13573	0.50861
GO:0010949	negative regulation of intestinal phytosterol absorption	1	818	2	21946	0.073159	0.31002	13.4144	1.13573	0.50861
GO:0008628	hormone-mediated apoptotic signaling pathway	1	818	2	21946	0.073159	0.31002	13.4144	1.13573	0.50861
GO:0043402	glucocorticoid mediated signaling pathway	1	818	2	21946	0.073159	0.31002	13.4144	1.13573	0.50861
GO:0009991	response to extracellular stimulus	1	818	2	21946	0.073159	0.31002	13.4144	1.13573	0.50861
GO:0021610	facial nerve morphogenesis	1	818	2	21946	0.073159	0.31002	13.4144	1.13573	0.50861
GO:0033540	fatty acid beta-oxidation using acyl-CoA oxidase	1	818	2	21946	0.073159	0.31002	13.4144	1.13573	0.50861
GO:1990418	response to insulin-like growth factor stimulus	1	818	2	21946	0.073159	0.31002	13.4144	1.13573	0.50861
GO:0086097	phospholipase C-activating angiotensin-activated signaling pathway	1	818	2	21946	0.073159	0.31002	13.4144	1.13573	0.50861
GO:0090559	regulation of membrane permeability	1	818	2	21946	0.073159	0.31002	13.4144	1.13573	0.50861
GO:0086046	membrane depolarization during SA node cell action potential	1	818	2	21946	0.073159	0.31002	13.4144	1.13573	0.50861
GO:0021589	cerebellum structural organization	1	818	2	21946	0.073159	0.31002	13.4144	1.13573	0.50861
GO:0021592	fourth ventricle development	1	818	2	21946	0.073159	0.31002	13.4144	1.13573	0.50861
GO:0034401	chromatin organization involved in regulation of transcription	1	818	2	21946	0.073159	0.31002	13.4144	1.13573	0.50861
GO:0097156	fasciculation of motor neuron axon	1	818	2	21946	0.073159	0.31002	13.4144	1.13573	0.50861
GO:0002826	negative regulation of T-helper 1 type immune response	1	818	2	21946	0.073159	0.31002	13.4144	1.13573	0.50861
GO:0048635	negative regulation of muscle organ development	1	818	2	21946	0.073159	0.31002	13.4144	1.13573	0.50861
GO:0048638	regulation of developmental growth	1	818	2	21946	0.073159	0.31002	13.4144	1.13573	0.50861
GO:0002891	positive regulation of immunoglobulin mediated immune response	1	818	2	21946	0.073159	0.31002	13.4144	1.13573	0.50861
GO:0070104	negative regulation of interleukin-6-mediated signaling pathway	1	818	2	21946	0.073159	0.31002	13.4144	1.13573	0.50861
GO:0032268	regulation of cellular protein metabolic process	1	818	2	21946	0.073159	0.31002	13.4144	1.13573	0.50861
GO:0070106	interleukin-27-mediated signaling pathway	1	818	2	21946	0.073159	0.31002	13.4144	1.13573	0.50861
GO:0050973	detection of mechanical stimulus involved in equilibrioception	1	818	2	21946	0.073159	0.31002	13.4144	1.13573	0.50861
GO:1901894	regulation of calcium-transporting ATPase activity	1	818	2	21946	0.073159	0.31002	13.4144	1.13573	0.50861
GO:1902742	apoptotic process involved in development	1	818	2	21946	0.073159	0.31002	13.4144	1.13573	0.50861
GO:0014846	esophagus smooth muscle contraction	1	818	2	21946	0.073159	0.31002	13.4144	1.13573	0.50861
GO:0035358	regulation of peroxisome proliferator activated receptor signaling pathway	1	818	2	21946	0.073159	0.31002	13.4144	1.13573	0.50861
GO:0050925	negative regulation of negative chemotaxis	1	818	2	21946	0.073159	0.31002	13.4144	1.13573	0.50861
GO:0090114	COPII-coated vesicle budding	1	818	2	21946	0.073159	0.31002	13.4144	1.13573	0.50861
GO:0071879	positive regulation of adrenergic receptor signaling pathway	1	818	2	21946	0.073159	0.31002	13.4144	1.13573	0.50861
GO:0050942	positive regulation of pigment cell differentiation	1	818	2	21946	0.073159	0.31002	13.4144	1.13573	0.50861
GO:1900020	positive regulation of protein kinase C activity	1	818	2	21946	0.073159	0.31002	13.4144	1.13573	0.50861
GO:1902692	regulation of neuroblast proliferation	1	818	2	21946	0.073159	0.31002	13.4144	1.13573	0.50861
GO:0060437	lung growth	1	818	2	21946	0.073159	0.31002	13.4144	1.13573	0.50861
GO:0031943	regulation of glucocorticoid metabolic process	1	818	2	21946	0.073159	0.31002	13.4144	1.13573	0.50861
GO:0006529	asparagine biosynthetic process	1	818	2	21946	0.073159	0.31002	13.4144	1.13573	0.50861
GO:0070253	somatostatin secretion	1	818	2	21946	0.073159	0.31002	13.4144	1.13573	0.50861
GO:0038154	interleukin-11-mediated signaling pathway	1	818	2	21946	0.073159	0.31002	13.4144	1.13573	0.50861
GO:2001180	negative regulation of interleukin-10 secretion	1	818	2	21946	0.073159	0.31002	13.4144	1.13573	0.50861
GO:0007418	ventral midline development	1	818	2	21946	0.073159	0.31002	13.4144	1.13573	0.50861
GO:0006557	S-adenosylmethioninamine biosynthetic process	1	818	2	21946	0.073159	0.31002	13.4144	1.13573	0.50861
GO:0089700	protein kinase D signaling	1	818	2	21946	0.073159	0.31002	13.4144	1.13573	0.50861
GO:0003097	renal water transport	1	818	2	21946	0.073159	0.31002	13.4144	1.13573	0.50861
GO:0060032	notochord regression	1	818	2	21946	0.073159	0.31002	13.4144	1.13573	0.50861
GO:0010623	developmental programmed cell death	1	818	2	21946	0.073159	0.31002	13.4144	1.13573	0.50861
GO:0032861	activation of Rap GTPase activity	1	818	2	21946	0.073159	0.31002	13.4144	1.13573	0.50861
GO:1902260	negative regulation of delayed rectifier potassium channel activity	1	818	2	21946	0.073159	0.31002	13.4144	1.13573	0.50861
GO:0044334	canonical Wnt signaling pathway involved in positive regulation of epithelial to mesenchymal transition	1	818	2	21946	0.073159	0.31002	13.4144	1.13573	0.50861
GO:0071954	chemokine (C-C motif) ligand 11 production	1	818	2	21946	0.073159	0.31002	13.4144	1.13573	0.50861
GO:0035802	adrenal cortex formation	1	818	2	21946	0.073159	0.31002	13.4144	1.13573	0.50861
GO:0033624	negative regulation of integrin activation	1	818	2	21946	0.073159	0.31002	13.4144	1.13573	0.50861
GO:0018008	N-terminal peptidyl-glycine N-myristoylation	1	818	2	21946	0.073159	0.31002	13.4144	1.13573	0.50861
GO:0009590	detection of gravity	1	818	2	21946	0.073159	0.31002	13.4144	1.13573	0.50861
GO:0032350	regulation of hormone metabolic process	1	818	2	21946	0.073159	0.31002	13.4144	1.13573	0.50861
GO:0042595	behavioral response to starvation	1	818	2	21946	0.073159	0.31002	13.4144	1.13573	0.50861
GO:0042126	nitrate metabolic process	1	818	2	21946	0.073159	0.31002	13.4144	1.13573	0.50861
GO:0044791	positive regulation by host of viral release from host cell	1	818	2	21946	0.073159	0.31002	13.4144	1.13573	0.50861
GO:0001672	regulation of chromatin assembly or disassembly	1	818	2	21946	0.073159	0.31002	13.4144	1.13573	0.50861
GO:0071529	cementum mineralization	1	818	2	21946	0.073159	0.31002	13.4144	1.13573	0.50861
GO:0046104	thymidine metabolic process	1	818	2	21946	0.073159	0.31002	13.4144	1.13573	0.50861
GO:0060427	lung connective tissue development	1	818	2	21946	0.073159	0.31002	13.4144	1.13573	0.50861
GO:0035411	catenin import into nucleus	1	818	2	21946	0.073159	0.31002	13.4144	1.13573	0.50861
GO:0035408	histone H3-T6 phosphorylation	1	818	2	21946	0.073159	0.31002	13.4144	1.13573	0.50861
GO:0060419	heart growth	1	818	2	21946	0.073159	0.31002	13.4144	1.13573	0.50861
GO:0000379	tRNA-type intron splice site recognition and cleavage	1	818	2	21946	0.073159	0.31002	13.4144	1.13573	0.50861
GO:0003404	optic vesicle morphogenesis	1	818	2	21946	0.073159	0.31002	13.4144	1.13573	0.50861
GO:0055002	striated muscle cell development	1	818	2	21946	0.073159	0.31002	13.4144	1.13573	0.50861
GO:0035470	positive regulation of vascular wound healing	1	818	2	21946	0.073159	0.31002	13.4144	1.13573	0.50861
GO:0002537	nitric oxide production involved in inflammatory response	1	818	2	21946	0.073159	0.31002	13.4144	1.13573	0.50861
GO:0035459	cargo loading into vesicle	1	818	2	21946	0.073159	0.31002	13.4144	1.13573	0.50861
GO:0009791	post-embryonic development	7	818	98	21946	0.0734472	0.310729	1.91635	1.13402	0.507618
GO:0007565	female pregnancy	6	818	79	21946	0.0742757	0.313717	2.03763	1.12915	0.503462
GO:0070373	negative regulation of ERK1 and ERK2 cascade	4	818	43	21946	0.0753037	0.31598	2.49571	1.12318	0.50034
GO:0050729	positive regulation of inflammatory response	4	818	43	21946	0.0753037	0.31598	2.49571	1.12318	0.50034
GO:0050852	T cell receptor signaling pathway	4	818	43	21946	0.0753037	0.31598	2.49571	1.12318	0.50034
GO:0032729	positive regulation of interferon-gamma production	4	818	43	21946	0.0753037	0.31598	2.49571	1.12318	0.50034
GO:0008344	adult locomotory behavior	5	818	61	21946	0.076648	0.320052	2.19909	1.1155	0.494779
GO:0001938	positive regulation of endothelial cell proliferation	5	818	61	21946	0.076648	0.320052	2.19909	1.1155	0.494779
GO:0042475	odontogenesis of dentin-containing tooth	5	818	61	21946	0.076648	0.320052	2.19909	1.1155	0.494779
GO:0031648	protein destabilization	3	818	27	21946	0.0778144	0.322149	2.98098	1.10894	0.491944
GO:0071375	cellular response to peptide hormone stimulus	3	818	27	21946	0.0778144	0.322149	2.98098	1.10894	0.491944
GO:0045930	negative regulation of mitotic cell cycle	3	818	27	21946	0.0778144	0.322149	2.98098	1.10894	0.491944
GO:0002009	morphogenesis of an epithelium	3	818	27	21946	0.0778144	0.322149	2.98098	1.10894	0.491944
GO:0071902	positive regulation of protein serine/threonine kinase activity	3	818	27	21946	0.0778144	0.322149	2.98098	1.10894	0.491944
GO:0051216	cartilage development	6	818	80	21946	0.0779028	0.322149	2.01216	1.10845	0.491944
GO:0006811	ion transport	30	818	614	21946	0.0804869	0.330801	1.31086	1.09427	0.480433
GO:0045740	positive regulation of DNA replication	4	818	44	21946	0.0805104	0.330801	2.43899	1.09415	0.480433
GO:0000186	activation of MAPKK activity	4	818	44	21946	0.0805104	0.330801	2.43899	1.09415	0.480433
GO:0030514	negative regulation of BMP signaling pathway	4	818	44	21946	0.0805104	0.330801	2.43899	1.09415	0.480433
GO:0007030	Golgi organization	5	818	62	21946	0.0809485	0.330986	2.16362	1.09179	0.480191
GO:0010738	regulation of protein kinase A signaling	2	818	13	21946	0.0824886	0.330986	4.12752	1.08361	0.480191
GO:0061036	positive regulation of cartilage development	2	818	13	21946	0.0824886	0.330986	4.12752	1.08361	0.480191
GO:0007076	mitotic chromosome condensation	2	818	13	21946	0.0824886	0.330986	4.12752	1.08361	0.480191
GO:0003214	cardiac left ventricle morphogenesis	2	818	13	21946	0.0824886	0.330986	4.12752	1.08361	0.480191
GO:2000060	positive regulation of protein ubiquitination involved in ubiquitin-dependent protein catabolic process	2	818	13	21946	0.0824886	0.330986	4.12752	1.08361	0.480191
GO:0050892	intestinal absorption	2	818	13	21946	0.0824886	0.330986	4.12752	1.08361	0.480191
GO:0006309	apoptotic DNA fragmentation	2	818	13	21946	0.0824886	0.330986	4.12752	1.08361	0.480191
GO:0046907	intracellular transport	2	818	13	21946	0.0824886	0.330986	4.12752	1.08361	0.480191
GO:0032753	positive regulation of interleukin-4 production	2	818	13	21946	0.0824886	0.330986	4.12752	1.08361	0.480191
GO:0045104	intermediate filament cytoskeleton organization	2	818	13	21946	0.0824886	0.330986	4.12752	1.08361	0.480191
GO:0031929	TOR signaling	2	818	13	21946	0.0824886	0.330986	4.12752	1.08361	0.480191
GO:0032854	positive regulation of Rap GTPase activity	2	818	13	21946	0.0824886	0.330986	4.12752	1.08361	0.480191
GO:0021675	nerve development	2	818	13	21946	0.0824886	0.330986	4.12752	1.08361	0.480191
GO:0010592	positive regulation of lamellipodium assembly	2	818	13	21946	0.0824886	0.330986	4.12752	1.08361	0.480191
GO:0050775	positive regulation of dendrite morphogenesis	3	818	28	21946	0.0848419	0.336491	2.87452	1.07139	0.473027
GO:0008045	motor neuron axon guidance	3	818	28	21946	0.0848419	0.336491	2.87452	1.07139	0.473027
GO:0006493	protein O-linked glycosylation	3	818	28	21946	0.0848419	0.336491	2.87452	1.07139	0.473027
GO:0007517	muscle organ development	5	818	63	21946	0.0853747	0.336491	2.12927	1.06867	0.473027
GO:0006006	glucose metabolic process	5	818	63	21946	0.0853747	0.336491	2.12927	1.06867	0.473027
GO:0051781	positive regulation of cell division	4	818	45	21946	0.0858904	0.336491	2.38479	1.06606	0.473027
GO:0051865	protein autoubiquitination	4	818	45	21946	0.0858904	0.336491	2.38479	1.06606	0.473027
GO:0000122	negative regulation of transcription from RNA polymerase II promoter	33	818	692	21946	0.0891354	0.336491	1.27941	1.04995	0.473027
GO:0071320	cellular response to cAMP	4	818	46	21946	0.0914405	0.336491	2.33294	1.03886	0.473027
GO:0009411	response to UV	4	818	46	21946	0.0914405	0.336491	2.33294	1.03886	0.473027
GO:0007257	activation of JUN kinase activity	3	818	29	21946	0.0921285	0.336491	2.7754	1.03561	0.473027
GO:0021522	spinal cord motor neuron differentiation	3	818	29	21946	0.0921285	0.336491	2.7754	1.03561	0.473027
GO:2000114	regulation of establishment of cell polarity	2	818	14	21946	0.0939355	0.336491	3.83269	1.02717	0.473027
GO:1901652	response to peptide	2	818	14	21946	0.0939355	0.336491	3.83269	1.02717	0.473027
GO:0048856	anatomical structure development	2	818	14	21946	0.0939355	0.336491	3.83269	1.02717	0.473027
GO:0071380	cellular response to prostaglandin E stimulus	2	818	14	21946	0.0939355	0.336491	3.83269	1.02717	0.473027
GO:0043267	negative regulation of potassium ion transport	2	818	14	21946	0.0939355	0.336491	3.83269	1.02717	0.473027
GO:0010875	positive regulation of cholesterol efflux	2	818	14	21946	0.0939355	0.336491	3.83269	1.02717	0.473027
GO:0021527	spinal cord association neuron differentiation	2	818	14	21946	0.0939355	0.336491	3.83269	1.02717	0.473027
GO:0030048	actin filament-based movement	2	818	14	21946	0.0939355	0.336491	3.83269	1.02717	0.473027
GO:0060766	negative regulation of androgen receptor signaling pathway	2	818	14	21946	0.0939355	0.336491	3.83269	1.02717	0.473027
GO:0032270	positive regulation of cellular protein metabolic process	2	818	14	21946	0.0939355	0.336491	3.83269	1.02717	0.473027
GO:0031529	ruffle organization	2	818	14	21946	0.0939355	0.336491	3.83269	1.02717	0.473027
GO:0071407	cellular response to organic cyclic compound	5	818	65	21946	0.0945992	0.336491	2.06376	1.02411	0.473027
GO:0006468	protein phosphorylation	30	818	625	21946	0.095205	0.336491	1.28778	1.02134	0.473027
GO:0003151	outflow tract morphogenesis	4	818	47	21946	0.097157	0.336491	2.28331	1.01253	0.473027
GO:0003333	amino acid transmembrane transport	4	818	47	21946	0.097157	0.336491	2.28331	1.01253	0.473027
GO:0031532	actin cytoskeleton reorganization	4	818	47	21946	0.097157	0.336491	2.28331	1.01253	0.473027
GO:0034599	cellular response to oxidative stress	4	818	47	21946	0.097157	0.336491	2.28331	1.01253	0.473027
GO:0006695	cholesterol biosynthetic process	3	818	30	21946	0.0996638	0.336491	2.68289	1.00146	0.473027
GO:0045777	positive regulation of blood pressure	3	818	30	21946	0.0996638	0.336491	2.68289	1.00146	0.473027
GO:0007193	adenylate cyclase-inhibiting G-protein coupled receptor signaling pathway	3	818	30	21946	0.0996638	0.336491	2.68289	1.00146	0.473027
GO:0006446	regulation of translational initiation	3	818	30	21946	0.0996638	0.336491	2.68289	1.00146	0.473027
GO:0014911	positive regulation of smooth muscle cell migration	3	818	30	21946	0.0996638	0.336491	2.68289	1.00146	0.473027
GO:0006355	regulation of transcription, DNA-templated	95	818	2241	21946	0.0998636	0.336491	1.13732	1.00059	0.473027
GO:0005975	carbohydrate metabolic process	12	818	213	21946	0.102422	0.336491	1.51148	0.989605	0.473027
GO:0030512	negative regulation of transforming growth factor beta receptor signaling pathway	4	818	48	21946	0.103036	0.336491	2.23574	0.987009	0.473027
GO:0050773	regulation of dendrite development	2	818	15	21946	0.105804	0.336491	3.57718	0.975497	0.473027
GO:0045725	positive regulation of glycogen biosynthetic process	2	818	15	21946	0.105804	0.336491	3.57718	0.975497	0.473027
GO:0050710	negative regulation of cytokine secretion	2	818	15	21946	0.105804	0.336491	3.57718	0.975497	0.473027
GO:2000045	regulation of G1/S transition of mitotic cell cycle	2	818	15	21946	0.105804	0.336491	3.57718	0.975497	0.473027
GO:0015693	magnesium ion transport	2	818	15	21946	0.105804	0.336491	3.57718	0.975497	0.473027
GO:0086004	regulation of cardiac muscle cell contraction	2	818	15	21946	0.105804	0.336491	3.57718	0.975497	0.473027
GO:0050868	negative regulation of T cell activation	2	818	15	21946	0.105804	0.336491	3.57718	0.975497	0.473027
GO:0030949	positive regulation of vascular endothelial growth factor receptor signaling pathway	2	818	15	21946	0.105804	0.336491	3.57718	0.975497	0.473027
GO:0051016	barbed-end actin filament capping	2	818	15	21946	0.105804	0.336491	3.57718	0.975497	0.473027
GO:0051497	negative regulation of stress fiber assembly	2	818	15	21946	0.105804	0.336491	3.57718	0.975497	0.473027
GO:0031333	negative regulation of protein complex assembly	2	818	15	21946	0.105804	0.336491	3.57718	0.975497	0.473027
GO:0070997	neuron death	2	818	15	21946	0.105804	0.336491	3.57718	0.975497	0.473027
GO:0050930	induction of positive chemotaxis	2	818	15	21946	0.105804	0.336491	3.57718	0.975497	0.473027
GO:1902236	negative regulation of endoplasmic reticulum stress-induced intrinsic apoptotic signaling pathway	2	818	15	21946	0.105804	0.336491	3.57718	0.975497	0.473027
GO:0048712	negative regulation of astrocyte differentiation	2	818	15	21946	0.105804	0.336491	3.57718	0.975497	0.473027
GO:0007050	cell cycle arrest	6	818	87	21946	0.106006	0.336491	1.85027	0.97467	0.473027
GO:0051928	positive regulation of calcium ion transport	3	818	31	21946	0.107437	0.336491	2.59634	0.968846	0.473027
GO:2000111	positive regulation of macrophage apoptotic process	1	818	3	21946	0.107709	0.336491	8.94295	0.96775	0.473027
GO:2000172	regulation of branching morphogenesis of a nerve	1	818	3	21946	0.107709	0.336491	8.94295	0.96775	0.473027
GO:0070358	actin polymerization-dependent cell motility	1	818	3	21946	0.107709	0.336491	8.94295	0.96775	0.473027
GO:2000195	negative regulation of female gonad development	1	818	3	21946	0.107709	0.336491	8.94295	0.96775	0.473027
GO:0061055	myotome development	1	818	3	21946	0.107709	0.336491	8.94295	0.96775	0.473027
GO:0042775	mitochondrial ATP synthesis coupled electron transport	1	818	3	21946	0.107709	0.336491	8.94295	0.96775	0.473027
GO:0021828	gonadotrophin-releasing hormone neuronal migration to the hypothalamus	1	818	3	21946	0.107709	0.336491	8.94295	0.96775	0.473027
GO:0006206	pyrimidine nucleobase metabolic process	1	818	3	21946	0.107709	0.336491	8.94295	0.96775	0.473027
GO:0061074	regulation of neural retina development	1	818	3	21946	0.107709	0.336491	8.94295	0.96775	0.473027
GO:0032946	positive regulation of mononuclear cell proliferation	1	818	3	21946	0.107709	0.336491	8.94295	0.96775	0.473027
GO:0061084	negative regulation of protein refolding	1	818	3	21946	0.107709	0.336491	8.94295	0.96775	0.473027
GO:0036066	protein O-linked fucosylation	1	818	3	21946	0.107709	0.336491	8.94295	0.96775	0.473027
GO:0003166	bundle of His development	1	818	3	21946	0.107709	0.336491	8.94295	0.96775	0.473027
GO:0097477	lateral motor column neuron migration	1	818	3	21946	0.107709	0.336491	8.94295	0.96775	0.473027
GO:1903441	protein localization to ciliary membrane	1	818	3	21946	0.107709	0.336491	8.94295	0.96775	0.473027
GO:0061010	gall bladder development	1	818	3	21946	0.107709	0.336491	8.94295	0.96775	0.473027
GO:0003190	atrioventricular valve formation	1	818	3	21946	0.107709	0.336491	8.94295	0.96775	0.473027
GO:0048069	eye pigmentation	1	818	3	21946	0.107709	0.336491	8.94295	0.96775	0.473027
GO:0001710	mesodermal cell fate commitment	1	818	3	21946	0.107709	0.336491	8.94295	0.96775	0.473027
GO:0035947	regulation of gluconeogenesis by regulation of transcription from RNA polymerase II promoter	1	818	3	21946	0.107709	0.336491	8.94295	0.96775	0.473027
GO:0090310	negative regulation of methylation-dependent chromatin silencing	1	818	3	21946	0.107709	0.336491	8.94295	0.96775	0.473027
GO:0021775	smoothened signaling pathway involved in ventral spinal cord interneuron specification	1	818	3	21946	0.107709	0.336491	8.94295	0.96775	0.473027
GO:0021776	smoothened signaling pathway involved in spinal cord motor neuron cell fate specification	1	818	3	21946	0.107709	0.336491	8.94295	0.96775	0.473027
GO:0021764	amygdala development	1	818	3	21946	0.107709	0.336491	8.94295	0.96775	0.473027
GO:0001306	age-dependent response to oxidative stress	1	818	3	21946	0.107709	0.336491	8.94295	0.96775	0.473027
GO:0001788	antibody-dependent cellular cytotoxicity	1	818	3	21946	0.107709	0.336491	8.94295	0.96775	0.473027
GO:0007089	traversing start control point of mitotic cell cycle	1	818	3	21946	0.107709	0.336491	8.94295	0.96775	0.473027
GO:0000018	regulation of DNA recombination	1	818	3	21946	0.107709	0.336491	8.94295	0.96775	0.473027
GO:0048841	regulation of axon extension involved in axon guidance	1	818	3	21946	0.107709	0.336491	8.94295	0.96775	0.473027
GO:1900740	positive regulation of protein insertion into mitochondrial membrane involved in apoptotic signaling pathway	1	818	3	21946	0.107709	0.336491	8.94295	0.96775	0.473027
GO:0036123	histone H3-K9 dimethylation	1	818	3	21946	0.107709	0.336491	8.94295	0.96775	0.473027
GO:0048133	male germ-line stem cell asymmetric division	1	818	3	21946	0.107709	0.336491	8.94295	0.96775	0.473027
GO:0051304	chromosome separation	1	818	3	21946	0.107709	0.336491	8.94295	0.96775	0.473027
GO:0051795	positive regulation of catagen	1	818	3	21946	0.107709	0.336491	8.94295	0.96775	0.473027
GO:0071332	cellular response to fructose stimulus	1	818	3	21946	0.107709	0.336491	8.94295	0.96775	0.473027
GO:0036151	phosphatidylcholine acyl-chain remodeling	1	818	3	21946	0.107709	0.336491	8.94295	0.96775	0.473027
GO:1903375	facioacoustic ganglion development	1	818	3	21946	0.107709	0.336491	8.94295	0.96775	0.473027
GO:0061197	fungiform papilla morphogenesis	1	818	3	21946	0.107709	0.336491	8.94295	0.96775	0.473027
GO:0042447	hormone catabolic process	1	818	3	21946	0.107709	0.336491	8.94295	0.96775	0.473027
GO:0007638	mechanosensory behavior	1	818	3	21946	0.107709	0.336491	8.94295	0.96775	0.473027
GO:1901142	insulin metabolic process	1	818	3	21946	0.107709	0.336491	8.94295	0.96775	0.473027
GO:0006362	transcription elongation from RNA polymerase I promoter	1	818	3	21946	0.107709	0.336491	8.94295	0.96775	0.473027
GO:0070093	negative regulation of glucagon secretion	1	818	3	21946	0.107709	0.336491	8.94295	0.96775	0.473027
GO:0021508	floor plate formation	1	818	3	21946	0.107709	0.336491	8.94295	0.96775	0.473027
GO:0010841	positive regulation of circadian sleep/wake cycle, wakefulness	1	818	3	21946	0.107709	0.336491	8.94295	0.96775	0.473027
GO:0097091	synaptic vesicle clustering	1	818	3	21946	0.107709	0.336491	8.94295	0.96775	0.473027
GO:0001820	serotonin secretion	1	818	3	21946	0.107709	0.336491	8.94295	0.96775	0.473027
GO:0006295	nucleotide-excision repair, DNA incision, 3'-to lesion	1	818	3	21946	0.107709	0.336491	8.94295	0.96775	0.473027
GO:0065002	intracellular protein transmembrane transport	1	818	3	21946	0.107709	0.336491	8.94295	0.96775	0.473027
GO:0031223	auditory behavior	1	818	3	21946	0.107709	0.336491	8.94295	0.96775	0.473027
GO:0001805	positive regulation of type III hypersensitivity	1	818	3	21946	0.107709	0.336491	8.94295	0.96775	0.473027
GO:0070857	regulation of bile acid biosynthetic process	1	818	3	21946	0.107709	0.336491	8.94295	0.96775	0.473027
GO:0046717	acid secretion	1	818	3	21946	0.107709	0.336491	8.94295	0.96775	0.473027
GO:1901985	positive regulation of protein acetylation	1	818	3	21946	0.107709	0.336491	8.94295	0.96775	0.473027
GO:0048525	negative regulation of viral process	1	818	3	21946	0.107709	0.336491	8.94295	0.96775	0.473027
GO:0071315	cellular response to morphine	1	818	3	21946	0.107709	0.336491	8.94295	0.96775	0.473027
GO:0031296	B cell costimulation	1	818	3	21946	0.107709	0.336491	8.94295	0.96775	0.473027
GO:0002317	plasma cell differentiation	1	818	3	21946	0.107709	0.336491	8.94295	0.96775	0.473027
GO:0033043	regulation of organelle organization	1	818	3	21946	0.107709	0.336491	8.94295	0.96775	0.473027
GO:0060368	regulation of Fc receptor mediated stimulatory signaling pathway	1	818	3	21946	0.107709	0.336491	8.94295	0.96775	0.473027
GO:0072369	regulation of lipid transport by positive regulation of transcription from RNA polymerase II promoter	1	818	3	21946	0.107709	0.336491	8.94295	0.96775	0.473027
GO:0010909	positive regulation of heparan sulfate proteoglycan biosynthetic process	1	818	3	21946	0.107709	0.336491	8.94295	0.96775	0.473027
GO:1900108	negative regulation of nodal signaling pathway	1	818	3	21946	0.107709	0.336491	8.94295	0.96775	0.473027
GO:0060341	regulation of cellular localization	1	818	3	21946	0.107709	0.336491	8.94295	0.96775	0.473027
GO:0051873	killing by host of symbiont cells	1	818	3	21946	0.107709	0.336491	8.94295	0.96775	0.473027
GO:0072318	clathrin coat disassembly	1	818	3	21946	0.107709	0.336491	8.94295	0.96775	0.473027
GO:0038028	insulin receptor signaling pathway via phosphatidylinositol 3-kinase	1	818	3	21946	0.107709	0.336491	8.94295	0.96775	0.473027
GO:1901077	regulation of relaxation of muscle	1	818	3	21946	0.107709	0.336491	8.94295	0.96775	0.473027
GO:0051025	negative regulation of immunoglobulin secretion	1	818	3	21946	0.107709	0.336491	8.94295	0.96775	0.473027
GO:0042976	activation of Janus kinase activity	1	818	3	21946	0.107709	0.336491	8.94295	0.96775	0.473027
GO:0072383	plus-end-directed vesicle transport along microtubule	1	818	3	21946	0.107709	0.336491	8.94295	0.96775	0.473027
GO:0042510	regulation of tyrosine phosphorylation of Stat1 protein	1	818	3	21946	0.107709	0.336491	8.94295	0.96775	0.473027
GO:0042520	positive regulation of tyrosine phosphorylation of Stat4 protein	1	818	3	21946	0.107709	0.336491	8.94295	0.96775	0.473027
GO:0018394	peptidyl-lysine acetylation	1	818	3	21946	0.107709	0.336491	8.94295	0.96775	0.473027
GO:0019230	proprioception	1	818	3	21946	0.107709	0.336491	8.94295	0.96775	0.473027
GO:0021536	diencephalon development	1	818	3	21946	0.107709	0.336491	8.94295	0.96775	0.473027
GO:0043382	positive regulation of memory T cell differentiation	1	818	3	21946	0.107709	0.336491	8.94295	0.96775	0.473027
GO:0032651	regulation of interleukin-1 beta production	1	818	3	21946	0.107709	0.336491	8.94295	0.96775	0.473027
GO:0019287	isopentenyl diphosphate biosynthetic process, mevalonate pathway	1	818	3	21946	0.107709	0.336491	8.94295	0.96775	0.473027
GO:0021562	vestibulocochlear nerve development	1	818	3	21946	0.107709	0.336491	8.94295	0.96775	0.473027
GO:0097155	fasciculation of sensory neuron axon	1	818	3	21946	0.107709	0.336491	8.94295	0.96775	0.473027
GO:0030035	microspike assembly	1	818	3	21946	0.107709	0.336491	8.94295	0.96775	0.473027
GO:0014858	positive regulation of skeletal muscle cell proliferation	1	818	3	21946	0.107709	0.336491	8.94295	0.96775	0.473027
GO:0046486	glycerolipid metabolic process	1	818	3	21946	0.107709	0.336491	8.94295	0.96775	0.473027
GO:0045590	negative regulation of regulatory T cell differentiation	1	818	3	21946	0.107709	0.336491	8.94295	0.96775	0.473027
GO:0035330	regulation of hippo signaling	1	818	3	21946	0.107709	0.336491	8.94295	0.96775	0.473027
GO:0048625	myoblast fate commitment	1	818	3	21946	0.107709	0.336491	8.94295	0.96775	0.473027
GO:0060492	lung induction	1	818	3	21946	0.107709	0.336491	8.94295	0.96775	0.473027
GO:0043932	ossification involved in bone remodeling	1	818	3	21946	0.107709	0.336491	8.94295	0.96775	0.473027
GO:0003006	developmental process involved in reproduction	1	818	3	21946	0.107709	0.336491	8.94295	0.96775	0.473027
GO:0016321	female meiosis chromosome segregation	1	818	3	21946	0.107709	0.336491	8.94295	0.96775	0.473027
GO:1902667	regulation of axon guidance	1	818	3	21946	0.107709	0.336491	8.94295	0.96775	0.473027
GO:0006990	positive regulation of transcription from RNA polymerase II promoter involved in unfolded protein response	1	818	3	21946	0.107709	0.336491	8.94295	0.96775	0.473027
GO:0002155	regulation of thyroid hormone mediated signaling pathway	1	818	3	21946	0.107709	0.336491	8.94295	0.96775	0.473027
GO:0072061	inner medullary collecting duct development	1	818	3	21946	0.107709	0.336491	8.94295	0.96775	0.473027
GO:0097374	sensory neuron axon guidance	1	818	3	21946	0.107709	0.336491	8.94295	0.96775	0.473027
GO:0072095	regulation of branch elongation involved in ureteric bud branching	1	818	3	21946	0.107709	0.336491	8.94295	0.96775	0.473027
GO:0051142	positive regulation of NK T cell proliferation	1	818	3	21946	0.107709	0.336491	8.94295	0.96775	0.473027
GO:0019860	uracil metabolic process	1	818	3	21946	0.107709	0.336491	8.94295	0.96775	0.473027
GO:0030641	regulation of cellular pH	1	818	3	21946	0.107709	0.336491	8.94295	0.96775	0.473027
GO:0045715	negative regulation of low-density lipoprotein particle receptor biosynthetic process	1	818	3	21946	0.107709	0.336491	8.94295	0.96775	0.473027
GO:0045716	positive regulation of low-density lipoprotein particle receptor biosynthetic process	1	818	3	21946	0.107709	0.336491	8.94295	0.96775	0.473027
GO:0003093	regulation of glomerular filtration	1	818	3	21946	0.107709	0.336491	8.94295	0.96775	0.473027
GO:0051562	negative regulation of mitochondrial calcium ion concentration	1	818	3	21946	0.107709	0.336491	8.94295	0.96775	0.473027
GO:0035910	ascending aorta morphogenesis	1	818	3	21946	0.107709	0.336491	8.94295	0.96775	0.473027
GO:0042631	cellular response to water deprivation	1	818	3	21946	0.107709	0.336491	8.94295	0.96775	0.473027
GO:0030201	heparan sulfate proteoglycan metabolic process	1	818	3	21946	0.107709	0.336491	8.94295	0.96775	0.473027
GO:1900086	positive regulation of peptidyl-tyrosine autophosphorylation	1	818	3	21946	0.107709	0.336491	8.94295	0.96775	0.473027
GO:0044828	negative regulation by host of viral genome replication	1	818	3	21946	0.107709	0.336491	8.94295	0.96775	0.473027
GO:1903595	positive regulation of histamine secretion by mast cell	1	818	3	21946	0.107709	0.336491	8.94295	0.96775	0.473027
GO:0006597	spermine biosynthetic process	1	818	3	21946	0.107709	0.336491	8.94295	0.96775	0.473027
GO:0021678	third ventricle development	1	818	3	21946	0.107709	0.336491	8.94295	0.96775	0.473027
GO:0010535	positive regulation of activation of JAK2 kinase activity	1	818	3	21946	0.107709	0.336491	8.94295	0.96775	0.473027
GO:0032317	regulation of Rap GTPase activity	1	818	3	21946	0.107709	0.336491	8.94295	0.96775	0.473027
GO:0038094	Fc-gamma receptor signaling pathway	1	818	3	21946	0.107709	0.336491	8.94295	0.96775	0.473027
GO:0010998	regulation of translational initiation by eIF2 alpha phosphorylation	1	818	3	21946	0.107709	0.336491	8.94295	0.96775	0.473027
GO:0000720	pyrimidine dimer repair by nucleotide-excision repair	1	818	3	21946	0.107709	0.336491	8.94295	0.96775	0.473027
GO:0051046	regulation of secretion	1	818	3	21946	0.107709	0.336491	8.94295	0.96775	0.473027
GO:2000729	positive regulation of mesenchymal cell proliferation involved in ureter development	1	818	3	21946	0.107709	0.336491	8.94295	0.96775	0.473027
GO:0045626	negative regulation of T-helper 1 cell differentiation	1	818	3	21946	0.107709	0.336491	8.94295	0.96775	0.473027
GO:0034112	positive regulation of homotypic cell-cell adhesion	1	818	3	21946	0.107709	0.336491	8.94295	0.96775	0.473027
GO:2000757	negative regulation of peptidyl-lysine acetylation	1	818	3	21946	0.107709	0.336491	8.94295	0.96775	0.473027
GO:0048769	sarcomerogenesis	1	818	3	21946	0.107709	0.336491	8.94295	0.96775	0.473027
GO:0060421	positive regulation of heart growth	1	818	3	21946	0.107709	0.336491	8.94295	0.96775	0.473027
GO:1902608	positive regulation of large conductance calcium-activated potassium channel activity	1	818	3	21946	0.107709	0.336491	8.94295	0.96775	0.473027
GO:0045218	zonula adherens maintenance	1	818	3	21946	0.107709	0.336491	8.94295	0.96775	0.473027
GO:0044375	regulation of peroxisome size	1	818	3	21946	0.107709	0.336491	8.94295	0.96775	0.473027
GO:1901727	positive regulation of histone deacetylase activity	1	818	3	21946	0.107709	0.336491	8.94295	0.96775	0.473027
GO:0072659	protein localization to plasma membrane	5	818	68	21946	0.109342	0.341179	1.97271	0.961213	0.467018
GO:0071805	potassium ion transmembrane transport	8	818	130	21946	0.113084	0.352426	1.65101	0.9466	0.452932
GO:0045785	positive regulation of cell adhesion	4	818	50	21946	0.115268	0.356314	2.14631	0.938293	0.448167
GO:0002027	regulation of heart rate	3	818	32	21946	0.115437	0.356314	2.5152	0.937653	0.448167
GO:0030177	positive regulation of Wnt signaling pathway	3	818	32	21946	0.115437	0.356314	2.5152	0.937653	0.448167
GO:0031069	hair follicle morphogenesis	3	818	32	21946	0.115437	0.356314	2.5152	0.937653	0.448167
GO:0016567	protein ubiquitination	22	818	448	21946	0.115692	0.356314	1.31749	0.936697	0.448167
GO:0006693	prostaglandin metabolic process	2	818	16	21946	0.118048	0.356314	3.35361	0.927942	0.448167
GO:0007512	adult heart development	2	818	16	21946	0.118048	0.356314	3.35361	0.927942	0.448167
GO:0008340	determination of adult lifespan	2	818	16	21946	0.118048	0.356314	3.35361	0.927942	0.448167
GO:0032456	endocytic recycling	2	818	16	21946	0.118048	0.356314	3.35361	0.927942	0.448167
GO:0007088	regulation of mitosis	2	818	16	21946	0.118048	0.356314	3.35361	0.927942	0.448167
GO:0032012	regulation of ARF protein signal transduction	2	818	16	21946	0.118048	0.356314	3.35361	0.927942	0.448167
GO:0048870	cell motility	2	818	16	21946	0.118048	0.356314	3.35361	0.927942	0.448167
GO:0045022	early endosome to late endosome transport	2	818	16	21946	0.118048	0.356314	3.35361	0.927942	0.448167
GO:0050860	negative regulation of T cell receptor signaling pathway	2	818	16	21946	0.118048	0.356314	3.35361	0.927942	0.448167
GO:0070986	left/right axis specification	2	818	16	21946	0.118048	0.356314	3.35361	0.927942	0.448167
GO:0046827	positive regulation of protein export from nucleus	2	818	16	21946	0.118048	0.356314	3.35361	0.927942	0.448167
GO:0032230	positive regulation of synaptic transmission, GABAergic	2	818	16	21946	0.118048	0.356314	3.35361	0.927942	0.448167
GO:0060009	Sertoli cell development	2	818	16	21946	0.118048	0.356314	3.35361	0.927942	0.448167
GO:0008299	isoprenoid biosynthetic process	2	818	16	21946	0.118048	0.356314	3.35361	0.927942	0.448167
GO:0009058	biosynthetic process	4	818	51	21946	0.121611	0.356314	2.10422	0.915028	0.448167
GO:0030178	negative regulation of Wnt signaling pathway	4	818	51	21946	0.121611	0.356314	2.10422	0.915028	0.448167
GO:0007205	protein kinase C-activating G-protein coupled receptor signaling pathway	3	818	33	21946	0.123654	0.356314	2.43899	0.907792	0.448167
GO:0010332	response to gamma radiation	3	818	33	21946	0.123654	0.356314	2.43899	0.907792	0.448167
GO:0007416	synapse assembly	3	818	33	21946	0.123654	0.356314	2.43899	0.907792	0.448167
GO:1903506	regulation of nucleic acid-templated transcription	5	818	71	21946	0.125127	0.356314	1.88936	0.90265	0.448167
GO:0030336	negative regulation of cell migration	6	818	92	21946	0.128875	0.356314	1.74971	0.889831	0.448167
GO:0034765	regulation of ion transmembrane transport	10	818	178	21946	0.12951	0.356314	1.50724	0.887695	0.448167
GO:0042472	inner ear morphogenesis	5	818	72	21946	0.13061	0.356314	1.86311	0.884025	0.448167
GO:0043623	cellular protein complex assembly	2	818	17	21946	0.130621	0.356314	3.15634	0.883986	0.448167
GO:0050730	regulation of peptidyl-tyrosine phosphorylation	2	818	17	21946	0.130621	0.356314	3.15634	0.883986	0.448167
GO:0048566	embryonic digestive tract development	2	818	17	21946	0.130621	0.356314	3.15634	0.883986	0.448167
GO:0015695	organic cation transport	2	818	17	21946	0.130621	0.356314	3.15634	0.883986	0.448167
GO:0001841	neural tube formation	2	818	17	21946	0.130621	0.356314	3.15634	0.883986	0.448167
GO:0030517	negative regulation of axon extension	2	818	17	21946	0.130621	0.356314	3.15634	0.883986	0.448167
GO:0006939	smooth muscle contraction	2	818	17	21946	0.130621	0.356314	3.15634	0.883986	0.448167
GO:0035855	megakaryocyte development	2	818	17	21946	0.130621	0.356314	3.15634	0.883986	0.448167
GO:0009165	nucleotide biosynthetic process	2	818	17	21946	0.130621	0.356314	3.15634	0.883986	0.448167
GO:0006911	phagocytosis, engulfment	2	818	17	21946	0.130621	0.356314	3.15634	0.883986	0.448167
GO:0043065	positive regulation of apoptotic process	15	818	292	21946	0.131967	0.356314	1.37819	0.879535	0.448167
GO:0048013	ephrin receptor signaling pathway	3	818	34	21946	0.132075	0.356314	2.36725	0.879179	0.448167
GO:0035115	embryonic forelimb morphogenesis	3	818	34	21946	0.132075	0.356314	2.36725	0.879179	0.448167
GO:0030879	mammary gland development	3	818	34	21946	0.132075	0.356314	2.36725	0.879179	0.448167
GO:0051898	negative regulation of protein kinase B signaling	3	818	34	21946	0.132075	0.356314	2.36725	0.879179	0.448167
GO:0060079	regulation of excitatory postsynaptic membrane potential	3	818	34	21946	0.132075	0.356314	2.36725	0.879179	0.448167
GO:0043523	regulation of neuron apoptotic process	3	818	34	21946	0.132075	0.356314	2.36725	0.879179	0.448167
GO:0006139	nucleobase-containing compound metabolic process	3	818	34	21946	0.132075	0.356314	2.36725	0.879179	0.448167
GO:0001654	eye development	3	818	34	21946	0.132075	0.356314	2.36725	0.879179	0.448167
GO:0006897	endocytosis	10	818	179	21946	0.132901	0.356314	1.49882	0.876471	0.448167
GO:0007507	heart development	11	818	202	21946	0.135186	0.356314	1.46098	0.869067	0.448167
GO:0007409	axonogenesis	6	818	94	21946	0.138637	0.356314	1.71248	0.858122	0.448167
GO:0072107	positive regulation of ureteric bud formation	1	818	4	21946	0.140972	0.356314	6.70721	0.850868	0.448167
GO:0051647	nucleus localization	1	818	4	21946	0.140972	0.356314	6.70721	0.850868	0.448167
GO:0036486	ventral trunk neural crest cell migration	1	818	4	21946	0.140972	0.356314	6.70721	0.850868	0.448167
GO:0002215	defense response to nematode	1	818	4	21946	0.140972	0.356314	6.70721	0.850868	0.448167
GO:0060574	intestinal epithelial cell maturation	1	818	4	21946	0.140972	0.356314	6.70721	0.850868	0.448167
GO:0072553	terminal button organization	1	818	4	21946	0.140972	0.356314	6.70721	0.850868	0.448167
GO:2000189	positive regulation of cholesterol homeostasis	1	818	4	21946	0.140972	0.356314	6.70721	0.850868	0.448167
GO:0097490	sympathetic neuron projection extension	1	818	4	21946	0.140972	0.356314	6.70721	0.850868	0.448167
GO:0097491	sympathetic neuron projection guidance	1	818	4	21946	0.140972	0.356314	6.70721	0.850868	0.448167
GO:0072193	ureter smooth muscle cell differentiation	1	818	4	21946	0.140972	0.356314	6.70721	0.850868	0.448167
GO:0016482	cytoplasmic transport	1	818	4	21946	0.140972	0.356314	6.70721	0.850868	0.448167
GO:0003150	muscular septum morphogenesis	1	818	4	21946	0.140972	0.356314	6.70721	0.850868	0.448167
GO:0010737	protein kinase A signaling	1	818	4	21946	0.140972	0.356314	6.70721	0.850868	0.448167
GO:0060155	platelet dense granule organization	1	818	4	21946	0.140972	0.356314	6.70721	0.850868	0.448167
GO:0031670	cellular response to nutrient	1	818	4	21946	0.140972	0.356314	6.70721	0.850868	0.448167
GO:0071288	cellular response to mercury ion	1	818	4	21946	0.140972	0.356314	6.70721	0.850868	0.448167
GO:0010748	negative regulation of plasma membrane long-chain fatty acid transport	1	818	4	21946	0.140972	0.356314	6.70721	0.850868	0.448167
GO:0061030	epithelial cell differentiation involved in mammary gland alveolus development	1	818	4	21946	0.140972	0.356314	6.70721	0.850868	0.448167
GO:0061031	endodermal digestive tract morphogenesis	1	818	4	21946	0.140972	0.356314	6.70721	0.850868	0.448167
GO:0003195	tricuspid valve formation	1	818	4	21946	0.140972	0.356314	6.70721	0.850868	0.448167
GO:0061038	uterus morphogenesis	1	818	4	21946	0.140972	0.356314	6.70721	0.850868	0.448167
GO:0032507	maintenance of protein location in cell	1	818	4	21946	0.140972	0.356314	6.70721	0.850868	0.448167
GO:0006235	dTTP biosynthetic process	1	818	4	21946	0.140972	0.356314	6.70721	0.850868	0.448167
GO:0032970	regulation of actin filament-based process	1	818	4	21946	0.140972	0.356314	6.70721	0.850868	0.448167
GO:0090330	regulation of platelet aggregation	1	818	4	21946	0.140972	0.356314	6.70721	0.850868	0.448167
GO:0010669	epithelial structure maintenance	1	818	4	21946	0.140972	0.356314	6.70721	0.850868	0.448167
GO:0042278	purine nucleoside metabolic process	1	818	4	21946	0.140972	0.356314	6.70721	0.850868	0.448167
GO:0035519	protein K29-linked ubiquitination	1	818	4	21946	0.140972	0.356314	6.70721	0.850868	0.448167
GO:0035995	detection of muscle stretch	1	818	4	21946	0.140972	0.356314	6.70721	0.850868	0.448167
GO:0032489	regulation of Cdc42 protein signal transduction	1	818	4	21946	0.140972	0.356314	6.70721	0.850868	0.448167
GO:0035990	tendon cell differentiation	1	818	4	21946	0.140972	0.356314	6.70721	0.850868	0.448167
GO:0007066	female meiosis sister chromatid cohesion	1	818	4	21946	0.140972	0.356314	6.70721	0.850868	0.448167
GO:0032474	otolith morphogenesis	1	818	4	21946	0.140972	0.356314	6.70721	0.850868	0.448167
GO:0060998	regulation of dendritic spine development	1	818	4	21946	0.140972	0.356314	6.70721	0.850868	0.448167
GO:0072513	positive regulation of secondary heart field cardioblast proliferation	1	818	4	21946	0.140972	0.356314	6.70721	0.850868	0.448167
GO:0034261	negative regulation of Ras GTPase activity	1	818	4	21946	0.140972	0.356314	6.70721	0.850868	0.448167
GO:0048858	cell projection morphogenesis	1	818	4	21946	0.140972	0.356314	6.70721	0.850868	0.448167
GO:0048861	leukemia inhibitory factor signaling pathway	1	818	4	21946	0.140972	0.356314	6.70721	0.850868	0.448167
GO:0060977	coronary vasculature morphogenesis	1	818	4	21946	0.140972	0.356314	6.70721	0.850868	0.448167
GO:0050702	interleukin-1 beta secretion	1	818	4	21946	0.140972	0.356314	6.70721	0.850868	0.448167
GO:1900212	negative regulation of mesenchymal cell apoptotic process involved in metanephros development	1	818	4	21946	0.140972	0.356314	6.70721	0.850868	0.448167
GO:0060686	negative regulation of prostatic bud formation	1	818	4	21946	0.140972	0.356314	6.70721	0.850868	0.448167
GO:0051725	protein de-ADP-ribosylation	1	818	4	21946	0.140972	0.356314	6.70721	0.850868	0.448167
GO:0016557	peroxisome membrane biogenesis	1	818	4	21946	0.140972	0.356314	6.70721	0.850868	0.448167
GO:0060675	ureteric bud morphogenesis	1	818	4	21946	0.140972	0.356314	6.70721	0.850868	0.448167
GO:0071322	cellular response to carbohydrate stimulus	1	818	4	21946	0.140972	0.356314	6.70721	0.850868	0.448167
GO:2000065	negative regulation of cortisol biosynthetic process	1	818	4	21946	0.140972	0.356314	6.70721	0.850868	0.448167
GO:0003231	cardiac ventricle development	1	818	4	21946	0.140972	0.356314	6.70721	0.850868	0.448167
GO:0030835	negative regulation of actin filament depolymerization	1	818	4	21946	0.140972	0.356314	6.70721	0.850868	0.448167
GO:0048592	eye morphogenesis	1	818	4	21946	0.140972	0.356314	6.70721	0.850868	0.448167
GO:0021938	smoothened signaling pathway involved in regulation of cerebellar granule cell precursor cell proliferation	1	818	4	21946	0.140972	0.356314	6.70721	0.850868	0.448167
GO:0006344	maintenance of chromatin silencing	1	818	4	21946	0.140972	0.356314	6.70721	0.850868	0.448167
GO:0072278	metanephric comma-shaped body morphogenesis	1	818	4	21946	0.140972	0.356314	6.70721	0.850868	0.448167
GO:0045899	positive regulation of RNA polymerase II transcriptional preinitiation complex assembly	1	818	4	21946	0.140972	0.356314	6.70721	0.850868	0.448167
GO:0016080	synaptic vesicle targeting	1	818	4	21946	0.140972	0.356314	6.70721	0.850868	0.448167
GO:0043201	response to leucine	1	818	4	21946	0.140972	0.356314	6.70721	0.850868	0.448167
GO:0032100	positive regulation of appetite	1	818	4	21946	0.140972	0.356314	6.70721	0.850868	0.448167
GO:0048512	circadian behavior	1	818	4	21946	0.140972	0.356314	6.70721	0.850868	0.448167
GO:0051716	cellular response to stimulus	1	818	4	21946	0.140972	0.356314	6.70721	0.850868	0.448167
GO:0071731	response to nitric oxide	1	818	4	21946	0.140972	0.356314	6.70721	0.850868	0.448167
GO:0060364	frontal suture morphogenesis	1	818	4	21946	0.140972	0.356314	6.70721	0.850868	0.448167
GO:0003383	apical constriction	1	818	4	21946	0.140972	0.356314	6.70721	0.850868	0.448167
GO:0090191	negative regulation of branching involved in ureteric bud morphogenesis	1	818	4	21946	0.140972	0.356314	6.70721	0.850868	0.448167
GO:0002018	renin-angiotensin regulation of aldosterone production	1	818	4	21946	0.140972	0.356314	6.70721	0.850868	0.448167
GO:0034088	maintenance of mitotic sister chromatid cohesion	1	818	4	21946	0.140972	0.356314	6.70721	0.850868	0.448167
GO:0030953	astral microtubule organization	1	818	4	21946	0.140972	0.356314	6.70721	0.850868	0.448167
GO:0010936	negative regulation of macrophage cytokine production	1	818	4	21946	0.140972	0.356314	6.70721	0.850868	0.448167
GO:0030538	embryonic genitalia morphogenesis	1	818	4	21946	0.140972	0.356314	6.70721	0.850868	0.448167
GO:0014042	positive regulation of neuron maturation	1	818	4	21946	0.140972	0.356314	6.70721	0.850868	0.448167
GO:0006482	protein demethylation	1	818	4	21946	0.140972	0.356314	6.70721	0.850868	0.448167
GO:0006499	N-terminal protein myristoylation	1	818	4	21946	0.140972	0.356314	6.70721	0.850868	0.448167
GO:0010989	negative regulation of low-density lipoprotein particle clearance	1	818	4	21946	0.140972	0.356314	6.70721	0.850868	0.448167
GO:0010988	regulation of low-density lipoprotein particle clearance	1	818	4	21946	0.140972	0.356314	6.70721	0.850868	0.448167
GO:0009972	cytidine deamination	1	818	4	21946	0.140972	0.356314	6.70721	0.850868	0.448167
GO:0042997	negative regulation of Golgi to plasma membrane protein transport	1	818	4	21946	0.140972	0.356314	6.70721	0.850868	0.448167
GO:0051464	positive regulation of cortisol secretion	1	818	4	21946	0.140972	0.356314	6.70721	0.850868	0.448167
GO:1990086	lens fiber cell apoptotic process	1	818	4	21946	0.140972	0.356314	6.70721	0.850868	0.448167
GO:0008582	regulation of synaptic growth at neuromuscular junction	1	818	4	21946	0.140972	0.356314	6.70721	0.850868	0.448167
GO:0021555	midbrain-hindbrain boundary morphogenesis	1	818	4	21946	0.140972	0.356314	6.70721	0.850868	0.448167
GO:0010897	negative regulation of triglyceride catabolic process	1	818	4	21946	0.140972	0.356314	6.70721	0.850868	0.448167
GO:0033522	histone H2A ubiquitination	1	818	4	21946	0.140972	0.356314	6.70721	0.850868	0.448167
GO:0009414	response to water deprivation	1	818	4	21946	0.140972	0.356314	6.70721	0.850868	0.448167
GO:0043372	positive regulation of CD4-positive, alpha-beta T cell differentiation	1	818	4	21946	0.140972	0.356314	6.70721	0.850868	0.448167
GO:0046886	positive regulation of hormone biosynthetic process	1	818	4	21946	0.140972	0.356314	6.70721	0.850868	0.448167
GO:0010454	negative regulation of cell fate commitment	1	818	4	21946	0.140972	0.356314	6.70721	0.850868	0.448167
GO:0019276	UDP-N-acetylgalactosamine metabolic process	1	818	4	21946	0.140972	0.356314	6.70721	0.850868	0.448167
GO:0032232	negative regulation of actin filament bundle assembly	1	818	4	21946	0.140972	0.356314	6.70721	0.850868	0.448167
GO:0021575	hindbrain morphogenesis	1	818	4	21946	0.140972	0.356314	6.70721	0.850868	0.448167
GO:0032225	regulation of synaptic transmission, dopaminergic	1	818	4	21946	0.140972	0.356314	6.70721	0.850868	0.448167
GO:0046464	acylglycerol catabolic process	1	818	4	21946	0.140972	0.356314	6.70721	0.850868	0.448167
GO:0048641	regulation of skeletal muscle tissue development	1	818	4	21946	0.140972	0.356314	6.70721	0.850868	0.448167
GO:0045132	meiotic chromosome segregation	1	818	4	21946	0.140972	0.356314	6.70721	0.850868	0.448167
GO:0015705	iodide transport	1	818	4	21946	0.140972	0.356314	6.70721	0.850868	0.448167
GO:1901897	regulation of relaxation of cardiac muscle	1	818	4	21946	0.140972	0.356314	6.70721	0.850868	0.448167
GO:0051835	positive regulation of synapse structural plasticity	1	818	4	21946	0.140972	0.356314	6.70721	0.850868	0.448167
GO:0090135	actin filament branching	1	818	4	21946	0.140972	0.356314	6.70721	0.850868	0.448167
GO:0045578	negative regulation of B cell differentiation	1	818	4	21946	0.140972	0.356314	6.70721	0.850868	0.448167
GO:0048619	embryonic hindgut morphogenesis	1	818	4	21946	0.140972	0.356314	6.70721	0.850868	0.448167
GO:1901841	regulation of high voltage-gated calcium channel activity	1	818	4	21946	0.140972	0.356314	6.70721	0.850868	0.448167
GO:1901844	regulation of cell communication by electrical coupling involved in cardiac conduction	1	818	4	21946	0.140972	0.356314	6.70721	0.850868	0.448167
GO:0060743	epithelial cell maturation involved in prostate gland development	1	818	4	21946	0.140972	0.356314	6.70721	0.850868	0.448167
GO:0033158	regulation of protein import into nucleus, translocation	1	818	4	21946	0.140972	0.356314	6.70721	0.850868	0.448167
GO:0042093	T-helper cell differentiation	1	818	4	21946	0.140972	0.356314	6.70721	0.850868	0.448167
GO:0060005	vestibular reflex	1	818	4	21946	0.140972	0.356314	6.70721	0.850868	0.448167
GO:0002125	maternal aggressive behavior	1	818	4	21946	0.140972	0.356314	6.70721	0.850868	0.448167
GO:0060018	astrocyte fate commitment	1	818	4	21946	0.140972	0.356314	6.70721	0.850868	0.448167
GO:0035088	establishment or maintenance of apical/basal cell polarity	1	818	4	21946	0.140972	0.356314	6.70721	0.850868	0.448167
GO:0055098	response to low-density lipoprotein particle	1	818	4	21946	0.140972	0.356314	6.70721	0.850868	0.448167
GO:0055099	response to high density lipoprotein particle	1	818	4	21946	0.140972	0.356314	6.70721	0.850868	0.448167
GO:0002159	desmosome assembly	1	818	4	21946	0.140972	0.356314	6.70721	0.850868	0.448167
GO:0051964	negative regulation of synapse assembly	1	818	4	21946	0.140972	0.356314	6.70721	0.850868	0.448167
GO:0031937	positive regulation of chromatin silencing	1	818	4	21946	0.140972	0.356314	6.70721	0.850868	0.448167
GO:0042659	regulation of cell fate specification	1	818	4	21946	0.140972	0.356314	6.70721	0.850868	0.448167
GO:1902285	semaphorin-plexin signaling pathway involved in neuron projection guidance	1	818	4	21946	0.140972	0.356314	6.70721	0.850868	0.448167
GO:0038127	ERBB signaling pathway	1	818	4	21946	0.140972	0.356314	6.70721	0.850868	0.448167
GO:0010626	negative regulation of Schwann cell proliferation	1	818	4	21946	0.140972	0.356314	6.70721	0.850868	0.448167
GO:0051572	negative regulation of histone H3-K4 methylation	1	818	4	21946	0.140972	0.356314	6.70721	0.850868	0.448167
GO:0072049	comma-shaped body morphogenesis	1	818	4	21946	0.140972	0.356314	6.70721	0.850868	0.448167
GO:0030204	chondroitin sulfate metabolic process	1	818	4	21946	0.140972	0.356314	6.70721	0.850868	0.448167
GO:0038165	oncostatin-M-mediated signaling pathway	1	818	4	21946	0.140972	0.356314	6.70721	0.850868	0.448167
GO:0007442	hindgut morphogenesis	1	818	4	21946	0.140972	0.356314	6.70721	0.850868	0.448167
GO:0032859	activation of Ral GTPase activity	1	818	4	21946	0.140972	0.356314	6.70721	0.850868	0.448167
GO:0044314	protein K27-linked ubiquitination	1	818	4	21946	0.140972	0.356314	6.70721	0.850868	0.448167
GO:0000711	meiotic DNA repair synthesis	1	818	4	21946	0.140972	0.356314	6.70721	0.850868	0.448167
GO:0051048	negative regulation of secretion	1	818	4	21946	0.140972	0.356314	6.70721	0.850868	0.448167
GO:0032369	negative regulation of lipid transport	1	818	4	21946	0.140972	0.356314	6.70721	0.850868	0.448167
GO:0042592	homeostatic process	1	818	4	21946	0.140972	0.356314	6.70721	0.850868	0.448167
GO:0010587	miRNA catabolic process	1	818	4	21946	0.140972	0.356314	6.70721	0.850868	0.448167
GO:0035860	glial cell-derived neurotrophic factor receptor signaling pathway	1	818	4	21946	0.140972	0.356314	6.70721	0.850868	0.448167
GO:0046959	habituation	1	818	4	21946	0.140972	0.356314	6.70721	0.850868	0.448167
GO:0032348	negative regulation of aldosterone biosynthetic process	1	818	4	21946	0.140972	0.356314	6.70721	0.850868	0.448167
GO:0051084	'de novo' posttranslational protein folding	1	818	4	21946	0.140972	0.356314	6.70721	0.850868	0.448167
GO:2000741	positive regulation of mesenchymal stem cell differentiation	1	818	4	21946	0.140972	0.356314	6.70721	0.850868	0.448167
GO:0009157	deoxyribonucleoside monophosphate biosynthetic process	1	818	4	21946	0.140972	0.356314	6.70721	0.850868	0.448167
GO:0002521	leukocyte differentiation	1	818	4	21946	0.140972	0.356314	6.70721	0.850868	0.448167
GO:0008295	spermidine biosynthetic process	1	818	4	21946	0.140972	0.356314	6.70721	0.850868	0.448167
GO:0090281	negative regulation of calcium ion import	1	818	4	21946	0.140972	0.356314	6.70721	0.850868	0.448167
GO:0033299	secretion of lysosomal enzymes	1	818	4	21946	0.140972	0.356314	6.70721	0.850868	0.448167
GO:0045213	neurotransmitter receptor metabolic process	1	818	4	21946	0.140972	0.356314	6.70721	0.850868	0.448167
GO:0090238	positive regulation of arachidonic acid secretion	1	818	4	21946	0.140972	0.356314	6.70721	0.850868	0.448167
GO:0071985	multivesicular body sorting pathway	1	818	4	21946	0.140972	0.356314	6.70721	0.850868	0.448167
GO:2000347	positive regulation of hepatocyte proliferation	1	818	4	21946	0.140972	0.356314	6.70721	0.850868	0.448167
GO:0006165	nucleoside diphosphate phosphorylation	2	818	18	21946	0.143484	0.35843	2.98098	0.843197	0.445595
GO:0031295	T cell costimulation	2	818	18	21946	0.143484	0.35843	2.98098	0.843197	0.445595
GO:0002076	osteoblast development	2	818	18	21946	0.143484	0.35843	2.98098	0.843197	0.445595
GO:0008589	regulation of smoothened signaling pathway	2	818	18	21946	0.143484	0.35843	2.98098	0.843197	0.445595
GO:0070933	histone H4 deacetylation	2	818	18	21946	0.143484	0.35843	2.98098	0.843197	0.445595
GO:0046426	negative regulation of JAK-STAT cascade	2	818	18	21946	0.143484	0.35843	2.98098	0.843197	0.445595
GO:0035329	hippo signaling	2	818	18	21946	0.143484	0.35843	2.98098	0.843197	0.445595
GO:0043536	positive regulation of blood vessel endothelial cell migration	2	818	18	21946	0.143484	0.35843	2.98098	0.843197	0.445595
GO:0010608	posttranscriptional regulation of gene expression	2	818	18	21946	0.143484	0.35843	2.98098	0.843197	0.445595
GO:0045648	positive regulation of erythrocyte differentiation	2	818	18	21946	0.143484	0.35843	2.98098	0.843197	0.445595
GO:0031032	actomyosin structure organization	2	818	18	21946	0.143484	0.35843	2.98098	0.843197	0.445595
GO:0001659	temperature homeostasis	2	818	18	21946	0.143484	0.35843	2.98098	0.843197	0.445595
GO:0007519	skeletal muscle tissue development	4	818	55	21946	0.148396	0.369981	1.95119	0.828578	0.43182
GO:0034613	cellular protein localization	4	818	55	21946	0.148396	0.369981	1.95119	0.828578	0.43182
GO:0048754	branching morphogenesis of an epithelial tube	3	818	36	21946	0.149487	0.371978	2.23574	0.825398	0.429483
GO:0055007	cardiac muscle cell differentiation	3	818	36	21946	0.149487	0.371978	2.23574	0.825398	0.429483
GO:0042310	vasoconstriction	2	818	19	21946	0.156596	0.37585	2.82409	0.805219	0.424985
GO:0042326	negative regulation of phosphorylation	2	818	19	21946	0.156596	0.37585	2.82409	0.805219	0.424985
GO:0090398	cellular senescence	2	818	19	21946	0.156596	0.37585	2.82409	0.805219	0.424985
GO:0021904	dorsal/ventral neural tube patterning	2	818	19	21946	0.156596	0.37585	2.82409	0.805219	0.424985
GO:0044130	negative regulation of growth of symbiont in host	2	818	19	21946	0.156596	0.37585	2.82409	0.805219	0.424985
GO:0009948	anterior/posterior axis specification	2	818	19	21946	0.156596	0.37585	2.82409	0.805219	0.424985
GO:0010460	positive regulation of heart rate	2	818	19	21946	0.156596	0.37585	2.82409	0.805219	0.424985
GO:0042462	eye photoreceptor cell development	2	818	19	21946	0.156596	0.37585	2.82409	0.805219	0.424985
GO:0001964	startle response	2	818	19	21946	0.156596	0.37585	2.82409	0.805219	0.424985
GO:0046847	filopodium assembly	2	818	19	21946	0.156596	0.37585	2.82409	0.805219	0.424985
GO:0016339	calcium-dependent cell-cell adhesion via plasma membrane cell adhesion molecules	2	818	19	21946	0.156596	0.37585	2.82409	0.805219	0.424985
GO:0032318	regulation of Ras GTPase activity	2	818	19	21946	0.156596	0.37585	2.82409	0.805219	0.424985
GO:0007568	aging	8	818	141	21946	0.156891	0.37585	1.5222	0.804403	0.424985
GO:0045429	positive regulation of nitric oxide biosynthetic process	3	818	37	21946	0.158454	0.37585	2.17531	0.800095	0.424985
GO:0060325	face morphogenesis	3	818	37	21946	0.158454	0.37585	2.17531	0.800095	0.424985
GO:0007059	chromosome segregation	5	818	77	21946	0.159574	0.37585	1.74213	0.797037	0.424985
GO:0007169	transmembrane receptor protein tyrosine kinase signaling pathway	6	818	99	21946	0.164471	0.37585	1.62599	0.78391	0.424985
GO:0015914	phospholipid transport	3	818	38	21946	0.167582	0.37585	2.11807	0.775772	0.424985
GO:0045859	regulation of protein kinase activity	3	818	38	21946	0.167582	0.37585	2.11807	0.775772	0.424985
GO:0030217	T cell differentiation	3	818	38	21946	0.167582	0.37585	2.11807	0.775772	0.424985
GO:0006281	DNA repair	15	818	305	21946	0.168556	0.37585	1.31945	0.773257	0.424985
GO:0042787	protein ubiquitination involved in ubiquitin-dependent protein catabolic process	4	818	58	21946	0.169831	0.37585	1.85027	0.769982	0.424985
GO:0048812	neuron projection morphogenesis	4	818	58	21946	0.169831	0.37585	1.85027	0.769982	0.424985
GO:0003007	heart morphogenesis	4	818	58	21946	0.169831	0.37585	1.85027	0.769982	0.424985
GO:0006612	protein targeting to membrane	2	818	20	21946	0.169922	0.37585	2.68289	0.769751	0.424985
GO:0030301	cholesterol transport	2	818	20	21946	0.169922	0.37585	2.68289	0.769751	0.424985
GO:0030318	melanocyte differentiation	2	818	20	21946	0.169922	0.37585	2.68289	0.769751	0.424985
GO:0031641	regulation of myelination	2	818	20	21946	0.169922	0.37585	2.68289	0.769751	0.424985
GO:0045332	phospholipid translocation	2	818	20	21946	0.169922	0.37585	2.68289	0.769751	0.424985
GO:0043409	negative regulation of MAPK cascade	2	818	20	21946	0.169922	0.37585	2.68289	0.769751	0.424985
GO:0006471	protein ADP-ribosylation	2	818	20	21946	0.169922	0.37585	2.68289	0.769751	0.424985
GO:0032733	positive regulation of interleukin-10 production	2	818	20	21946	0.169922	0.37585	2.68289	0.769751	0.424985
GO:0016601	Rac protein signal transduction	2	818	20	21946	0.169922	0.37585	2.68289	0.769751	0.424985
GO:0022604	regulation of cell morphogenesis	2	818	20	21946	0.169922	0.37585	2.68289	0.769751	0.424985
GO:0046579	positive regulation of Ras protein signal transduction	2	818	20	21946	0.169922	0.37585	2.68289	0.769751	0.424985
GO:0072584	caveolin-mediated endocytosis	1	818	5	21946	0.172996	0.37585	5.36577	0.761963	0.424985
GO:0071280	cellular response to copper ion	1	818	5	21946	0.172996	0.37585	5.36577	0.761963	0.424985
GO:0000046	autophagic vacuole fusion	1	818	5	21946	0.172996	0.37585	5.36577	0.761963	0.424985
GO:0050764	regulation of phagocytosis	1	818	5	21946	0.172996	0.37585	5.36577	0.761963	0.424985
GO:0003105	negative regulation of glomerular filtration	1	818	5	21946	0.172996	0.37585	5.36577	0.761963	0.424985
GO:0043654	recognition of apoptotic cell	1	818	5	21946	0.172996	0.37585	5.36577	0.761963	0.424985
GO:0018230	peptidyl-L-cysteine S-palmitoylation	1	818	5	21946	0.172996	0.37585	5.36577	0.761963	0.424985
GO:0071286	cellular response to magnesium ion	1	818	5	21946	0.172996	0.37585	5.36577	0.761963	0.424985
GO:0051224	negative regulation of protein transport	1	818	5	21946	0.172996	0.37585	5.36577	0.761963	0.424985
GO:0090336	positive regulation of brown fat cell differentiation	1	818	5	21946	0.172996	0.37585	5.36577	0.761963	0.424985
GO:0043584	nose development	1	818	5	21946	0.172996	0.37585	5.36577	0.761963	0.424985
GO:0060923	cardiac muscle cell fate commitment	1	818	5	21946	0.172996	0.37585	5.36577	0.761963	0.424985
GO:0048808	male genitalia morphogenesis	1	818	5	21946	0.172996	0.37585	5.36577	0.761963	0.424985
GO:0031581	hemidesmosome assembly	1	818	5	21946	0.172996	0.37585	5.36577	0.761963	0.424985
GO:0060948	cardiac vascular smooth muscle cell development	1	818	5	21946	0.172996	0.37585	5.36577	0.761963	0.424985
GO:0030241	skeletal muscle myosin thick filament assembly	1	818	5	21946	0.172996	0.37585	5.36577	0.761963	0.424985
GO:0030240	skeletal muscle thin filament assembly	1	818	5	21946	0.172996	0.37585	5.36577	0.761963	0.424985
GO:0007007	inner mitochondrial membrane organization	1	818	5	21946	0.172996	0.37585	5.36577	0.761963	0.424985
GO:0030299	intestinal cholesterol absorption	1	818	5	21946	0.172996	0.37585	5.36577	0.761963	0.424985
GO:0043570	maintenance of DNA repeat elements	1	818	5	21946	0.172996	0.37585	5.36577	0.761963	0.424985
GO:0002636	positive regulation of germinal center formation	1	818	5	21946	0.172996	0.37585	5.36577	0.761963	0.424985
GO:0060513	prostatic bud formation	1	818	5	21946	0.172996	0.37585	5.36577	0.761963	0.424985
GO:0035542	regulation of SNARE complex assembly	1	818	5	21946	0.172996	0.37585	5.36577	0.761963	0.424985
GO:0060956	endocardial cell differentiation	1	818	5	21946	0.172996	0.37585	5.36577	0.761963	0.424985
GO:0002686	negative regulation of leukocyte migration	1	818	5	21946	0.172996	0.37585	5.36577	0.761963	0.424985
GO:0060501	positive regulation of epithelial cell proliferation involved in lung morphogenesis	1	818	5	21946	0.172996	0.37585	5.36577	0.761963	0.424985
GO:0060978	angiogenesis involved in coronary vascular morphogenesis	1	818	5	21946	0.172996	0.37585	5.36577	0.761963	0.424985
GO:2000481	positive regulation of cAMP-dependent protein kinase activity	1	818	5	21946	0.172996	0.37585	5.36577	0.761963	0.424985
GO:0071377	cellular response to glucagon stimulus	1	818	5	21946	0.172996	0.37585	5.36577	0.761963	0.424985
GO:0003209	cardiac atrium morphogenesis	1	818	5	21946	0.172996	0.37585	5.36577	0.761963	0.424985
GO:0036124	histone H3-K9 trimethylation	1	818	5	21946	0.172996	0.37585	5.36577	0.761963	0.424985
GO:0002377	immunoglobulin production	1	818	5	21946	0.172996	0.37585	5.36577	0.761963	0.424985
GO:0060684	epithelial-mesenchymal cell signaling	1	818	5	21946	0.172996	0.37585	5.36577	0.761963	0.424985
GO:0045053	protein retention in Golgi apparatus	1	818	5	21946	0.172996	0.37585	5.36577	0.761963	0.424985
GO:0072207	metanephric epithelium development	1	818	5	21946	0.172996	0.37585	5.36577	0.761963	0.424985
GO:0021957	corticospinal tract morphogenesis	1	818	5	21946	0.172996	0.37585	5.36577	0.761963	0.424985
GO:0007635	chemosensory behavior	1	818	5	21946	0.172996	0.37585	5.36577	0.761963	0.424985
GO:0051387	negative regulation of neurotrophin TRK receptor signaling pathway	1	818	5	21946	0.172996	0.37585	5.36577	0.761963	0.424985
GO:0097113	alpha-amino-3-hydroxy-5-methyl-4-isoxazole propionate selective glutamate receptor clustering	1	818	5	21946	0.172996	0.37585	5.36577	0.761963	0.424985
GO:0060285	cilium-dependent cell motility	1	818	5	21946	0.172996	0.37585	5.36577	0.761963	0.424985
GO:0061156	pulmonary artery morphogenesis	1	818	5	21946	0.172996	0.37585	5.36577	0.761963	0.424985
GO:1901166	neural crest cell migration involved in autonomic nervous system development	1	818	5	21946	0.172996	0.37585	5.36577	0.761963	0.424985
GO:0072284	metanephric S-shaped body morphogenesis	1	818	5	21946	0.172996	0.37585	5.36577	0.761963	0.424985
GO:0010837	regulation of keratinocyte proliferation	1	818	5	21946	0.172996	0.37585	5.36577	0.761963	0.424985
GO:0070836	caveola assembly	1	818	5	21946	0.172996	0.37585	5.36577	0.761963	0.424985
GO:0097070	ductus arteriosus closure	1	818	5	21946	0.172996	0.37585	5.36577	0.761963	0.424985
GO:0006269	DNA replication, synthesis of RNA primer	1	818	5	21946	0.172996	0.37585	5.36577	0.761963	0.424985
GO:0097084	vascular smooth muscle cell development	1	818	5	21946	0.172996	0.37585	5.36577	0.761963	0.424985
GO:0021891	olfactory bulb interneuron development	1	818	5	21946	0.172996	0.37585	5.36577	0.761963	0.424985
GO:0001812	positive regulation of type I hypersensitivity	1	818	5	21946	0.172996	0.37585	5.36577	0.761963	0.424985
GO:0010324	membrane invagination	1	818	5	21946	0.172996	0.37585	5.36577	0.761963	0.424985
GO:0051707	response to other organism	1	818	5	21946	0.172996	0.37585	5.36577	0.761963	0.424985
GO:0060666	dichotomous subdivision of terminal units involved in salivary gland branching	1	818	5	21946	0.172996	0.37585	5.36577	0.761963	0.424985
GO:0002326	B cell lineage commitment	1	818	5	21946	0.172996	0.37585	5.36577	0.761963	0.424985
GO:0002328	pro-B cell differentiation	1	818	5	21946	0.172996	0.37585	5.36577	0.761963	0.424985
GO:0071481	cellular response to X-ray	1	818	5	21946	0.172996	0.37585	5.36577	0.761963	0.424985
GO:0035385	Roundabout signaling pathway	1	818	5	21946	0.172996	0.37585	5.36577	0.761963	0.424985
GO:0070120	ciliary neurotrophic factor-mediated signaling pathway	1	818	5	21946	0.172996	0.37585	5.36577	0.761963	0.424985
GO:0050996	positive regulation of lipid catabolic process	1	818	5	21946	0.172996	0.37585	5.36577	0.761963	0.424985
GO:1900102	negative regulation of endoplasmic reticulum unfolded protein response	1	818	5	21946	0.172996	0.37585	5.36577	0.761963	0.424985
GO:0002051	osteoblast fate commitment	1	818	5	21946	0.172996	0.37585	5.36577	0.761963	0.424985
GO:1900103	positive regulation of endoplasmic reticulum unfolded protein response	1	818	5	21946	0.172996	0.37585	5.36577	0.761963	0.424985
GO:0038033	positive regulation of endothelial cell chemotaxis by VEGF-activated vascular endothelial growth factor receptor signaling pathway	1	818	5	21946	0.172996	0.37585	5.36577	0.761963	0.424985
GO:0032725	positive regulation of granulocyte macrophage colony-stimulating factor production	1	818	5	21946	0.172996	0.37585	5.36577	0.761963	0.424985
GO:0002090	regulation of receptor internalization	1	818	5	21946	0.172996	0.37585	5.36577	0.761963	0.424985
GO:0038003	opioid receptor signaling pathway	1	818	5	21946	0.172996	0.37585	5.36577	0.761963	0.424985
GO:0019318	hexose metabolic process	1	818	5	21946	0.172996	0.37585	5.36577	0.761963	0.424985
GO:0072384	organelle transport along microtubule	1	818	5	21946	0.172996	0.37585	5.36577	0.761963	0.424985
GO:0051447	negative regulation of meiotic cell cycle	1	818	5	21946	0.172996	0.37585	5.36577	0.761963	0.424985
GO:0097211	cellular response to gonadotropin-releasing hormone	1	818	5	21946	0.172996	0.37585	5.36577	0.761963	0.424985
GO:0016266	O-glycan processing	1	818	5	21946	0.172996	0.37585	5.36577	0.761963	0.424985
GO:0016199	axon midline choice point recognition	1	818	5	21946	0.172996	0.37585	5.36577	0.761963	0.424985
GO:0006398	histone mRNA 3'-end processing	1	818	5	21946	0.172996	0.37585	5.36577	0.761963	0.424985
GO:2000821	regulation of grooming behavior	1	818	5	21946	0.172996	0.37585	5.36577	0.761963	0.424985
GO:0001991	regulation of systemic arterial blood pressure by circulatory renin-angiotensin	1	818	5	21946	0.172996	0.37585	5.36577	0.761963	0.424985
GO:0032237	activation of store-operated calcium channel activity	1	818	5	21946	0.172996	0.37585	5.36577	0.761963	0.424985
GO:0002819	regulation of adaptive immune response	1	818	5	21946	0.172996	0.37585	5.36577	0.761963	0.424985
GO:0060763	mammary duct terminal end bud growth	1	818	5	21946	0.172996	0.37585	5.36577	0.761963	0.424985
GO:0060754	positive regulation of mast cell chemotaxis	1	818	5	21946	0.172996	0.37585	5.36577	0.761963	0.424985
GO:0002860	positive regulation of natural killer cell mediated cytotoxicity directed against tumor cell target	1	818	5	21946	0.172996	0.37585	5.36577	0.761963	0.424985
GO:0070100	negative regulation of chemokine-mediated signaling pathway	1	818	5	21946	0.172996	0.37585	5.36577	0.761963	0.424985
GO:0014842	regulation of satellite cell proliferation	1	818	5	21946	0.172996	0.37585	5.36577	0.761963	0.424985
GO:0010040	response to iron(II) ion	1	818	5	21946	0.172996	0.37585	5.36577	0.761963	0.424985
GO:0035331	negative regulation of hippo signaling	1	818	5	21946	0.172996	0.37585	5.36577	0.761963	0.424985
GO:0033153	T cell receptor V(D)J recombination	1	818	5	21946	0.172996	0.37585	5.36577	0.761963	0.424985
GO:2000467	positive regulation of glycogen (starch) synthase activity	1	818	5	21946	0.172996	0.37585	5.36577	0.761963	0.424985
GO:0002115	store-operated calcium entry	1	818	5	21946	0.172996	0.37585	5.36577	0.761963	0.424985
GO:0023051	regulation of signaling	1	818	5	21946	0.172996	0.37585	5.36577	0.761963	0.424985
GO:0060029	convergent extension involved in organogenesis	1	818	5	21946	0.172996	0.37585	5.36577	0.761963	0.424985
GO:0051546	keratinocyte migration	1	818	5	21946	0.172996	0.37585	5.36577	0.761963	0.424985
GO:2000271	positive regulation of fibroblast apoptotic process	1	818	5	21946	0.172996	0.37585	5.36577	0.761963	0.424985
GO:0070236	negative regulation of activation-induced cell death of T cells	1	818	5	21946	0.172996	0.37585	5.36577	0.761963	0.424985
GO:0035093	spermatogenesis, exchange of chromosomal proteins	1	818	5	21946	0.172996	0.37585	5.36577	0.761963	0.424985
GO:0032819	positive regulation of natural killer cell proliferation	1	818	5	21946	0.172996	0.37585	5.36577	0.761963	0.424985
GO:0051574	positive regulation of histone H3-K9 methylation	1	818	5	21946	0.172996	0.37585	5.36577	0.761963	0.424985
GO:0071168	protein localization to chromatin	1	818	5	21946	0.172996	0.37585	5.36577	0.761963	0.424985
GO:0072050	S-shaped body morphogenesis	1	818	5	21946	0.172996	0.37585	5.36577	0.761963	0.424985
GO:0003081	regulation of systemic arterial blood pressure by renin-angiotensin	1	818	5	21946	0.172996	0.37585	5.36577	0.761963	0.424985
GO:0010606	positive regulation of cytoplasmic mRNA processing body assembly	1	818	5	21946	0.172996	0.37585	5.36577	0.761963	0.424985
GO:0010991	negative regulation of SMAD protein complex assembly	1	818	5	21946	0.172996	0.37585	5.36577	0.761963	0.424985
GO:0000303	response to superoxide	1	818	5	21946	0.172996	0.37585	5.36577	0.761963	0.424985
GO:0042590	antigen processing and presentation of exogenous peptide antigen via MHC class I	1	818	5	21946	0.172996	0.37585	5.36577	0.761963	0.424985
GO:0035865	cellular response to potassium ion	1	818	5	21946	0.172996	0.37585	5.36577	0.761963	0.424985
GO:0045629	negative regulation of T-helper 2 cell differentiation	1	818	5	21946	0.172996	0.37585	5.36577	0.761963	0.424985
GO:0097264	self proteolysis	1	818	5	21946	0.172996	0.37585	5.36577	0.761963	0.424985
GO:0045630	positive regulation of T-helper 2 cell differentiation	1	818	5	21946	0.172996	0.37585	5.36577	0.761963	0.424985
GO:0015837	amine transport	1	818	5	21946	0.172996	0.37585	5.36577	0.761963	0.424985
GO:0031062	positive regulation of histone methylation	1	818	5	21946	0.172996	0.37585	5.36577	0.761963	0.424985
GO:0015809	arginine transport	1	818	5	21946	0.172996	0.37585	5.36577	0.761963	0.424985
GO:2000774	positive regulation of cellular senescence	1	818	5	21946	0.172996	0.37585	5.36577	0.761963	0.424985
GO:0060415	muscle tissue morphogenesis	1	818	5	21946	0.172996	0.37585	5.36577	0.761963	0.424985
GO:0048312	intracellular distribution of mitochondria	1	818	5	21946	0.172996	0.37585	5.36577	0.761963	0.424985
GO:0015872	dopamine transport	1	818	5	21946	0.172996	0.37585	5.36577	0.761963	0.424985
GO:0035469	determination of pancreatic left/right asymmetry	1	818	5	21946	0.172996	0.37585	5.36577	0.761963	0.424985
GO:0048742	regulation of skeletal muscle fiber development	1	818	5	21946	0.172996	0.37585	5.36577	0.761963	0.424985
GO:0045893	positive regulation of transcription, DNA-templated	25	818	548	21946	0.174598	0.379009	1.22394	0.75796	0.42135
GO:0032922	circadian regulation of gene expression	4	818	59	21946	0.177206	0.384021	1.81891	0.751521	0.415645
GO:0000724	double-strand break repair via homologous recombination	4	818	59	21946	0.177206	0.384021	1.81891	0.751521	0.415645
GO:0070374	positive regulation of ERK1 and ERK2 cascade	7	818	124	21946	0.18081	0.390842	1.51453	0.742778	0.407999
GO:0030324	lung development	7	818	124	21946	0.18081	0.390842	1.51453	0.742778	0.407999
GO:0006814	sodium ion transport	7	818	124	21946	0.18081	0.390842	1.51453	0.742778	0.407999
GO:0090316	positive regulation of intracellular protein transport	2	818	21	21946	0.183427	0.39286	2.55513	0.736538	0.405762
GO:0048814	regulation of dendrite morphogenesis	2	818	21	21946	0.183427	0.39286	2.55513	0.736538	0.405762
GO:0035924	cellular response to vascular endothelial growth factor stimulus	2	818	21	21946	0.183427	0.39286	2.55513	0.736538	0.405762
GO:0032008	positive regulation of TOR signaling	2	818	21	21946	0.183427	0.39286	2.55513	0.736538	0.405762
GO:0072661	protein targeting to plasma membrane	2	818	21	21946	0.183427	0.39286	2.55513	0.736538	0.405762
GO:0045921	positive regulation of exocytosis	2	818	21	21946	0.183427	0.39286	2.55513	0.736538	0.405762
GO:0003382	epithelial cell morphogenesis	2	818	21	21946	0.183427	0.39286	2.55513	0.736538	0.405762
GO:0001502	cartilage condensation	2	818	21	21946	0.183427	0.39286	2.55513	0.736538	0.405762
GO:2000463	positive regulation of excitatory postsynaptic membrane potential	2	818	21	21946	0.183427	0.39286	2.55513	0.736538	0.405762
GO:0051968	positive regulation of synaptic transmission, glutamatergic	2	818	21	21946	0.183427	0.39286	2.55513	0.736538	0.405762
GO:0071526	semaphorin-plexin signaling pathway	2	818	21	21946	0.183427	0.39286	2.55513	0.736538	0.405762
GO:0043524	negative regulation of neuron apoptotic process	8	818	147	21946	0.183717	0.393155	1.46007	0.73585	0.405436
GO:0032869	cellular response to insulin stimulus	5	818	81	21946	0.184441	0.394375	1.6561	0.734142	0.40409
GO:0017148	negative regulation of translation	4	818	60	21946	0.184687	0.394572	1.78859	0.733564	0.403873
GO:0007067	mitotic nuclear division	13	818	263	21946	0.185077	0.395077	1.32614	0.732648	0.403319
GO:0018107	peptidyl-threonine phosphorylation	3	818	40	21946	0.186273	0.396539	2.01216	0.729851	0.401714
GO:0010468	regulation of gene expression	12	818	241	21946	0.190488	0.396539	1.33588	0.720132	0.401714
GO:1901215	negative regulation of neuron death	3	818	41	21946	0.195813	0.396539	1.96309	0.708157	0.401714
GO:0000060	protein import into nucleus, translocation	2	818	22	21946	0.197079	0.396539	2.43899	0.705359	0.401714
GO:0050772	positive regulation of axonogenesis	2	818	22	21946	0.197079	0.396539	2.43899	0.705359	0.401714
GO:0050770	regulation of axonogenesis	2	818	22	21946	0.197079	0.396539	2.43899	0.705359	0.401714
GO:0071385	cellular response to glucocorticoid stimulus	2	818	22	21946	0.197079	0.396539	2.43899	0.705359	0.401714
GO:0007140	male meiosis	2	818	22	21946	0.197079	0.396539	2.43899	0.705359	0.401714
GO:0003341	cilium movement	2	818	22	21946	0.197079	0.396539	2.43899	0.705359	0.401714
GO:0042517	positive regulation of tyrosine phosphorylation of Stat3 protein	2	818	22	21946	0.197079	0.396539	2.43899	0.705359	0.401714
GO:0048646	anatomical structure formation involved in morphogenesis	2	818	22	21946	0.197079	0.396539	2.43899	0.705359	0.401714
GO:0072001	renal system development	2	818	22	21946	0.197079	0.396539	2.43899	0.705359	0.401714
GO:0006509	membrane protein ectodomain proteolysis	2	818	22	21946	0.197079	0.396539	2.43899	0.705359	0.401714
GO:0030900	forebrain development	5	818	83	21946	0.197375	0.396539	1.6162	0.704707	0.401714
GO:0007389	pattern specification process	5	818	83	21946	0.197375	0.396539	1.6162	0.704707	0.401714
GO:0008203	cholesterol metabolic process	5	818	83	21946	0.197375	0.396539	1.6162	0.704707	0.401714
GO:0016477	cell migration	9	818	173	21946	0.198074	0.396539	1.39572	0.703172	0.401714
GO:0007283	spermatogenesis	17	818	363	21946	0.199382	0.396539	1.25645	0.700315	0.401714
GO:0006694	steroid biosynthetic process	4	818	62	21946	0.199946	0.396539	1.73089	0.699088	0.401714
GO:0031100	organ regeneration	4	818	62	21946	0.199946	0.396539	1.73089	0.699088	0.401714
GO:0045669	positive regulation of osteoblast differentiation	4	818	62	21946	0.199946	0.396539	1.73089	0.699088	0.401714
GO:0043085	positive regulation of catalytic activity	4	818	62	21946	0.199946	0.396539	1.73089	0.699088	0.401714
GO:0048511	rhythmic process	7	818	128	21946	0.201351	0.396539	1.4672	0.696047	0.401714
GO:0045471	response to ethanol	6	818	106	21946	0.203722	0.396539	1.51861	0.690962	0.401714
GO:0051645	Golgi localization	1	818	6	21946	0.203829	0.396539	4.47148	0.690735	0.401714
GO:0000075	cell cycle checkpoint	1	818	6	21946	0.203829	0.396539	4.47148	0.690735	0.401714
GO:0002281	macrophage activation involved in immune response	1	818	6	21946	0.203829	0.396539	4.47148	0.690735	0.401714
GO:0006654	phosphatidic acid biosynthetic process	1	818	6	21946	0.203829	0.396539	4.47148	0.690735	0.401714
GO:2001014	regulation of skeletal muscle cell differentiation	1	818	6	21946	0.203829	0.396539	4.47148	0.690735	0.401714
GO:2001028	positive regulation of endothelial cell chemotaxis	1	818	6	21946	0.203829	0.396539	4.47148	0.690735	0.401714
GO:0003149	membranous septum morphogenesis	1	818	6	21946	0.203829	0.396539	4.47148	0.690735	0.401714
GO:0010739	positive regulation of protein kinase A signaling	1	818	6	21946	0.203829	0.396539	4.47148	0.690735	0.401714
GO:0051683	establishment of Golgi localization	1	818	6	21946	0.203829	0.396539	4.47148	0.690735	0.401714
GO:0060179	male mating behavior	1	818	6	21946	0.203829	0.396539	4.47148	0.690735	0.401714
GO:0021797	forebrain anterior/posterior pattern specification	1	818	6	21946	0.203829	0.396539	4.47148	0.690735	0.401714
GO:0009649	entrainment of circadian clock	1	818	6	21946	0.203829	0.396539	4.47148	0.690735	0.401714
GO:0032410	negative regulation of transporter activity	1	818	6	21946	0.203829	0.396539	4.47148	0.690735	0.401714
GO:1901621	negative regulation of smoothened signaling pathway involved in dorsal/ventral neural tube patterning	1	818	6	21946	0.203829	0.396539	4.47148	0.690735	0.401714
GO:0001798	positive regulation of type IIa hypersensitivity	1	818	6	21946	0.203829	0.396539	4.47148	0.690735	0.401714
GO:2000651	positive regulation of sodium ion transmembrane transporter activity	1	818	6	21946	0.203829	0.396539	4.47148	0.690735	0.401714
GO:0090370	negative regulation of cholesterol efflux	1	818	6	21946	0.203829	0.396539	4.47148	0.690735	0.401714
GO:2000675	negative regulation of type B pancreatic cell apoptotic process	1	818	6	21946	0.203829	0.396539	4.47148	0.690735	0.401714
GO:0002360	T cell lineage commitment	1	818	6	21946	0.203829	0.396539	4.47148	0.690735	0.401714
GO:0060231	mesenchymal to epithelial transition	1	818	6	21946	0.203829	0.396539	4.47148	0.690735	0.401714
GO:0071321	cellular response to cGMP	1	818	6	21946	0.203829	0.396539	4.47148	0.690735	0.401714
GO:0015697	quaternary ammonium group transport	1	818	6	21946	0.203829	0.396539	4.47148	0.690735	0.401714
GO:0016556	mRNA modification	1	818	6	21946	0.203829	0.396539	4.47148	0.690735	0.401714
GO:0072673	lamellipodium morphogenesis	1	818	6	21946	0.203829	0.396539	4.47148	0.690735	0.401714
GO:0010815	bradykinin catabolic process	1	818	6	21946	0.203829	0.396539	4.47148	0.690735	0.401714
GO:0097104	postsynaptic membrane assembly	1	818	6	21946	0.203829	0.396539	4.47148	0.690735	0.401714
GO:0097114	N-methyl-D-aspartate receptor clustering	1	818	6	21946	0.203829	0.396539	4.47148	0.690735	0.401714
GO:0097119	postsynaptic density protein 95 clustering	1	818	6	21946	0.203829	0.396539	4.47148	0.690735	0.401714
GO:0060287	epithelial cilium movement involved in determination of left/right asymmetry	1	818	6	21946	0.203829	0.396539	4.47148	0.690735	0.401714
GO:0010830	regulation of myotube differentiation	1	818	6	21946	0.203829	0.396539	4.47148	0.690735	0.401714
GO:0034720	histone H3-K4 demethylation	1	818	6	21946	0.203829	0.396539	4.47148	0.690735	0.401714
GO:0048554	positive regulation of metalloenzyme activity	1	818	6	21946	0.203829	0.396539	4.47148	0.690735	0.401714
GO:0048505	regulation of timing of cell differentiation	1	818	6	21946	0.203829	0.396539	4.47148	0.690735	0.401714
GO:0071499	cellular response to laminar fluid shear stress	1	818	6	21946	0.203829	0.396539	4.47148	0.690735	0.401714
GO:0048263	determination of dorsal identity	1	818	6	21946	0.203829	0.396539	4.47148	0.690735	0.401714
GO:2001224	positive regulation of neuron migration	1	818	6	21946	0.203829	0.396539	4.47148	0.690735	0.401714
GO:0060372	regulation of atrial cardiac muscle cell membrane repolarization	1	818	6	21946	0.203829	0.396539	4.47148	0.690735	0.401714
GO:1901017	negative regulation of potassium ion transmembrane transporter activity	1	818	6	21946	0.203829	0.396539	4.47148	0.690735	0.401714
GO:1901018	positive regulation of potassium ion transmembrane transporter activity	1	818	6	21946	0.203829	0.396539	4.47148	0.690735	0.401714
GO:0030910	olfactory placode formation	1	818	6	21946	0.203829	0.396539	4.47148	0.690735	0.401714
GO:0072307	regulation of metanephric nephron tubule epithelial cell differentiation	1	818	6	21946	0.203829	0.396539	4.47148	0.690735	0.401714
GO:0014033	neural crest cell differentiation	1	818	6	21946	0.203829	0.396539	4.47148	0.690735	0.401714
GO:0045199	maintenance of epithelial cell apical/basal polarity	1	818	6	21946	0.203829	0.396539	4.47148	0.690735	0.401714
GO:0002093	auditory receptor cell morphogenesis	1	818	6	21946	0.203829	0.396539	4.47148	0.690735	0.401714
GO:0010917	negative regulation of mitochondrial membrane potential	1	818	6	21946	0.203829	0.396539	4.47148	0.690735	0.401714
GO:0021637	trigeminal nerve structural organization	1	818	6	21946	0.203829	0.396539	4.47148	0.690735	0.401714
GO:0033600	negative regulation of mammary gland epithelial cell proliferation	1	818	6	21946	0.203829	0.396539	4.47148	0.690735	0.401714
GO:0010894	negative regulation of steroid biosynthetic process	1	818	6	21946	0.203829	0.396539	4.47148	0.690735	0.401714
GO:0043353	enucleate erythrocyte differentiation	1	818	6	21946	0.203829	0.396539	4.47148	0.690735	0.401714
GO:0046879	hormone secretion	1	818	6	21946	0.203829	0.396539	4.47148	0.690735	0.401714
GO:0060706	cell differentiation involved in embryonic placenta development	1	818	6	21946	0.203829	0.396539	4.47148	0.690735	0.401714
GO:0042048	olfactory behavior	1	818	6	21946	0.203829	0.396539	4.47148	0.690735	0.401714
GO:0010457	centriole-centriole cohesion	1	818	6	21946	0.203829	0.396539	4.47148	0.690735	0.401714
GO:0042471	ear morphogenesis	1	818	6	21946	0.203829	0.396539	4.47148	0.690735	0.401714
GO:0046850	regulation of bone remodeling	1	818	6	21946	0.203829	0.396539	4.47148	0.690735	0.401714
GO:0002829	negative regulation of type 2 immune response	1	818	6	21946	0.203829	0.396539	4.47148	0.690735	0.401714
GO:0060762	regulation of branching involved in mammary gland duct morphogenesis	1	818	6	21946	0.203829	0.396539	4.47148	0.690735	0.401714
GO:0048639	positive regulation of developmental growth	1	818	6	21946	0.203829	0.396539	4.47148	0.690735	0.401714
GO:0050957	equilibrioception	1	818	6	21946	0.203829	0.396539	4.47148	0.690735	0.401714
GO:0060789	hair follicle placode formation	1	818	6	21946	0.203829	0.396539	4.47148	0.690735	0.401714
GO:0048664	neuron fate determination	1	818	6	21946	0.203829	0.396539	4.47148	0.690735	0.401714
GO:0033119	negative regulation of RNA splicing	1	818	6	21946	0.203829	0.396539	4.47148	0.690735	0.401714
GO:0002446	neutrophil mediated immunity	1	818	6	21946	0.203829	0.396539	4.47148	0.690735	0.401714
GO:0033152	immunoglobulin V(D)J recombination	1	818	6	21946	0.203829	0.396539	4.47148	0.690735	0.401714
GO:0050672	negative regulation of lymphocyte proliferation	1	818	6	21946	0.203829	0.396539	4.47148	0.690735	0.401714
GO:0070296	sarcoplasmic reticulum calcium ion transport	1	818	6	21946	0.203829	0.396539	4.47148	0.690735	0.401714
GO:0060449	bud elongation involved in lung branching	1	818	6	21946	0.203829	0.396539	4.47148	0.690735	0.401714
GO:0045292	mRNA cis splicing, via spliceosome	1	818	6	21946	0.203829	0.396539	4.47148	0.690735	0.401714
GO:0006518	peptide metabolic process	1	818	6	21946	0.203829	0.396539	4.47148	0.690735	0.401714
GO:0051983	regulation of chromosome segregation	1	818	6	21946	0.203829	0.396539	4.47148	0.690735	0.401714
GO:1902287	semaphorin-plexin signaling pathway involved in axon guidance	1	818	6	21946	0.203829	0.396539	4.47148	0.690735	0.401714
GO:0051135	positive regulation of NK T cell activation	1	818	6	21946	0.203829	0.396539	4.47148	0.690735	0.401714
GO:0035092	sperm chromatin condensation	1	818	6	21946	0.203829	0.396539	4.47148	0.690735	0.401714
GO:1902237	positive regulation of endoplasmic reticulum stress-induced intrinsic apoptotic signaling pathway	1	818	6	21946	0.203829	0.396539	4.47148	0.690735	0.401714
GO:0051573	negative regulation of histone H3-K9 methylation	1	818	6	21946	0.203829	0.396539	4.47148	0.690735	0.401714
GO:0030213	hyaluronan biosynthetic process	1	818	6	21946	0.203829	0.396539	4.47148	0.690735	0.401714
GO:0042634	regulation of hair cycle	1	818	6	21946	0.203829	0.396539	4.47148	0.690735	0.401714
GO:0044829	positive regulation by host of viral genome replication	1	818	6	21946	0.203829	0.396539	4.47148	0.690735	0.401714
GO:0042158	lipoprotein biosynthetic process	1	818	6	21946	0.203829	0.396539	4.47148	0.690735	0.401714
GO:0044336	canonical Wnt signaling pathway involved in negative regulation of apoptotic process	1	818	6	21946	0.203829	0.396539	4.47148	0.690735	0.401714
GO:0000729	DNA double-strand break processing	1	818	6	21946	0.203829	0.396539	4.47148	0.690735	0.401714
GO:0032367	intracellular cholesterol transport	1	818	6	21946	0.203829	0.396539	4.47148	0.690735	0.401714
GO:0051054	positive regulation of DNA metabolic process	1	818	6	21946	0.203829	0.396539	4.47148	0.690735	0.401714
GO:0021696	cerebellar cortex morphogenesis	1	818	6	21946	0.203829	0.396539	4.47148	0.690735	0.401714
GO:0014910	regulation of smooth muscle cell migration	1	818	6	21946	0.203829	0.396539	4.47148	0.690735	0.401714
GO:0071910	determination of liver left/right asymmetry	1	818	6	21946	0.203829	0.396539	4.47148	0.690735	0.401714
GO:0071907	determination of digestive tract left/right asymmetry	1	818	6	21946	0.203829	0.396539	4.47148	0.690735	0.401714
GO:0015807	L-amino acid transport	1	818	6	21946	0.203829	0.396539	4.47148	0.690735	0.401714
GO:0071557	histone H3-K27 demethylation	1	818	6	21946	0.203829	0.396539	4.47148	0.690735	0.401714
GO:0071559	response to transforming growth factor beta	1	818	6	21946	0.203829	0.396539	4.47148	0.690735	0.401714
GO:0048305	immunoglobulin secretion	1	818	6	21946	0.203829	0.396539	4.47148	0.690735	0.401714
GO:0055009	atrial cardiac muscle tissue morphogenesis	1	818	6	21946	0.203829	0.396539	4.47148	0.690735	0.401714
GO:2000324	positive regulation of glucocorticoid receptor signaling pathway	1	818	6	21946	0.203829	0.396539	4.47148	0.690735	0.401714
GO:0006936	muscle contraction	3	818	42	21946	0.20547	0.399431	1.91635	0.687251	0.398559
GO:0019827	stem cell maintenance	4	818	63	21946	0.207713	0.403486	1.70342	0.682535	0.394172
GO:0009880	embryonic pattern specification	2	818	23	21946	0.210849	0.406808	2.33294	0.676028	0.390611
GO:0012501	programmed cell death	2	818	23	21946	0.210849	0.406808	2.33294	0.676028	0.390611
GO:0010975	regulation of neuron projection development	2	818	23	21946	0.210849	0.406808	2.33294	0.676028	0.390611
GO:0032735	positive regulation of interleukin-12 production	2	818	23	21946	0.210849	0.406808	2.33294	0.676028	0.390611
GO:0032689	negative regulation of interferon-gamma production	2	818	23	21946	0.210849	0.406808	2.33294	0.676028	0.390611
GO:0001954	positive regulation of cell-matrix adhesion	2	818	23	21946	0.210849	0.406808	2.33294	0.676028	0.390611
GO:0050900	leukocyte migration	2	818	23	21946	0.210849	0.406808	2.33294	0.676028	0.390611
GO:0070932	histone H3 deacetylation	2	818	23	21946	0.210849	0.406808	2.33294	0.676028	0.390611
GO:0090190	positive regulation of branching involved in ureteric bud morphogenesis	2	818	23	21946	0.210849	0.406808	2.33294	0.676028	0.390611
GO:0043066	negative regulation of apoptotic process	23	818	514	21946	0.211547	0.407847	1.20051	0.674594	0.389503
GO:0045892	negative regulation of transcription, DNA-templated	24	818	539	21946	0.212295	0.408804	1.19461	0.673061	0.388485
GO:0006486	protein glycosylation	8	818	153	21946	0.212362	0.408804	1.40282	0.672924	0.388485
GO:0006974	cellular response to DNA damage stimulus	18	818	392	21946	0.213658	0.410991	1.23194	0.670282	0.386168
GO:0019722	calcium-mediated signaling	3	818	43	21946	0.215233	0.413093	1.87178	0.667091	0.383952
GO:0010977	negative regulation of neuron projection development	3	818	43	21946	0.215233	0.413093	1.87178	0.667091	0.383952
GO:0048706	embryonic skeletal system development	3	818	43	21946	0.215233	0.413093	1.87178	0.667091	0.383952
GO:0001570	vasculogenesis	4	818	64	21946	0.215566	0.413423	1.6768	0.66642	0.383605
GO:0030036	actin cytoskeleton organization	8	818	154	21946	0.217296	0.41643	1.39371	0.662948	0.380458
GO:0071222	cellular response to lipopolysaccharide	9	818	178	21946	0.220745	0.41701	1.35651	0.656108	0.379853
GO:0098655	cation transmembrane transport	7	818	132	21946	0.222741	0.41701	1.42274	0.652199	0.379853
GO:0051592	response to calcium ion	4	818	65	21946	0.223498	0.41701	1.65101	0.650726	0.379853
GO:0032967	positive regulation of collagen biosynthetic process	2	818	24	21946	0.22471	0.41701	2.23574	0.648378	0.379853
GO:0042832	defense response to protozoan	2	818	24	21946	0.22471	0.41701	2.23574	0.648378	0.379853
GO:0043278	response to morphine	2	818	24	21946	0.22471	0.41701	2.23574	0.648378	0.379853
GO:0046329	negative regulation of JNK cascade	2	818	24	21946	0.22471	0.41701	2.23574	0.648378	0.379853
GO:2001234	negative regulation of apoptotic signaling pathway	2	818	24	21946	0.22471	0.41701	2.23574	0.648378	0.379853
GO:0009416	response to light stimulus	2	818	24	21946	0.22471	0.41701	2.23574	0.648378	0.379853
GO:0034968	histone lysine methylation	2	818	24	21946	0.22471	0.41701	2.23574	0.648378	0.379853
GO:0010107	potassium ion import	2	818	24	21946	0.22471	0.41701	2.23574	0.648378	0.379853
GO:0000910	cytokinesis	3	818	44	21946	0.225091	0.41701	1.82924	0.647643	0.379853
GO:0021915	neural tube development	3	818	44	21946	0.225091	0.41701	1.82924	0.647643	0.379853
GO:0070936	protein K48-linked ubiquitination	3	818	44	21946	0.225091	0.41701	1.82924	0.647643	0.379853
GO:0006813	potassium ion transport	7	818	133	21946	0.22821	0.41701	1.41204	0.641665	0.379853
GO:0036010	protein localization to endosome	1	818	7	21946	0.233513	0.41701	3.83269	0.63169	0.379853
GO:0072583	clathrin-mediated endocytosis	1	818	7	21946	0.233513	0.41701	3.83269	0.63169	0.379853
GO:0000083	regulation of transcription involved in G1/S transition of mitotic cell cycle	1	818	7	21946	0.233513	0.41701	3.83269	0.63169	0.379853
GO:0051280	negative regulation of release of sequestered calcium ion into cytosol	1	818	7	21946	0.233513	0.41701	3.83269	0.63169	0.379853
GO:0085020	protein K6-linked ubiquitination	1	818	7	21946	0.233513	0.41701	3.83269	0.63169	0.379853
GO:0021860	pyramidal neuron development	1	818	7	21946	0.233513	0.41701	3.83269	0.63169	0.379853
GO:0031666	positive regulation of lipopolysaccharide-mediated signaling pathway	1	818	7	21946	0.233513	0.41701	3.83269	0.63169	0.379853
GO:0031642	negative regulation of myelination	1	818	7	21946	0.233513	0.41701	3.83269	0.63169	0.379853
GO:0021798	forebrain dorsal/ventral pattern formation	1	818	7	21946	0.233513	0.41701	3.83269	0.63169	0.379853
GO:0021785	branchiomotor neuron axon guidance	1	818	7	21946	0.233513	0.41701	3.83269	0.63169	0.379853
GO:0006144	purine nucleobase metabolic process	1	818	7	21946	0.233513	0.41701	3.83269	0.63169	0.379853
GO:0007006	mitochondrial membrane organization	1	818	7	21946	0.233513	0.41701	3.83269	0.63169	0.379853
GO:0040036	regulation of fibroblast growth factor receptor signaling pathway	1	818	7	21946	0.233513	0.41701	3.83269	0.63169	0.379853
GO:0000460	maturation of 5.8S rRNA	1	818	7	21946	0.233513	0.41701	3.83269	0.63169	0.379853
GO:0034214	protein hexamerization	1	818	7	21946	0.233513	0.41701	3.83269	0.63169	0.379853
GO:0043171	peptide catabolic process	1	818	7	21946	0.233513	0.41701	3.83269	0.63169	0.379853
GO:1902430	negative regulation of beta-amyloid formation	1	818	7	21946	0.233513	0.41701	3.83269	0.63169	0.379853
GO:0051764	actin crosslink formation	1	818	7	21946	0.233513	0.41701	3.83269	0.63169	0.379853
GO:0051302	regulation of cell division	1	818	7	21946	0.233513	0.41701	3.83269	0.63169	0.379853
GO:0021902	commitment of neuronal cell to specific neuron type in forebrain	1	818	7	21946	0.233513	0.41701	3.83269	0.63169	0.379853
GO:0072205	metanephric collecting duct development	1	818	7	21946	0.233513	0.41701	3.83269	0.63169	0.379853
GO:0090084	negative regulation of inclusion body assembly	1	818	7	21946	0.233513	0.41701	3.83269	0.63169	0.379853
GO:0021955	central nervous system neuron axonogenesis	1	818	7	21946	0.233513	0.41701	3.83269	0.63169	0.379853
GO:0006370	7-methylguanosine mRNA capping	1	818	7	21946	0.233513	0.41701	3.83269	0.63169	0.379853
GO:0043248	proteasome assembly	1	818	7	21946	0.233513	0.41701	3.83269	0.63169	0.379853
GO:0007171	activation of transmembrane receptor protein tyrosine kinase activity	1	818	7	21946	0.233513	0.41701	3.83269	0.63169	0.379853
GO:0001867	complement activation, lectin pathway	1	818	7	21946	0.233513	0.41701	3.83269	0.63169	0.379853
GO:0008064	regulation of actin polymerization or depolymerization	1	818	7	21946	0.233513	0.41701	3.83269	0.63169	0.379853
GO:0034351	negative regulation of glial cell apoptotic process	1	818	7	21946	0.233513	0.41701	3.83269	0.63169	0.379853
GO:1901522	positive regulation of transcription from RNA polymerase II promoter involved in cellular response to chemical stimulus	1	818	7	21946	0.233513	0.41701	3.83269	0.63169	0.379853
GO:0050856	regulation of T cell receptor signaling pathway	1	818	7	21946	0.233513	0.41701	3.83269	0.63169	0.379853
GO:0034393	positive regulation of smooth muscle cell apoptotic process	1	818	7	21946	0.233513	0.41701	3.83269	0.63169	0.379853
GO:0034392	negative regulation of smooth muscle cell apoptotic process	1	818	7	21946	0.233513	0.41701	3.83269	0.63169	0.379853
GO:0043266	regulation of potassium ion transport	1	818	7	21946	0.233513	0.41701	3.83269	0.63169	0.379853
GO:0050807	regulation of synapse organization	1	818	7	21946	0.233513	0.41701	3.83269	0.63169	0.379853
GO:0060613	fat pad development	1	818	7	21946	0.233513	0.41701	3.83269	0.63169	0.379853
GO:0008090	retrograde axon cargo transport	1	818	7	21946	0.233513	0.41701	3.83269	0.63169	0.379853
GO:0048247	lymphocyte chemotaxis	1	818	7	21946	0.233513	0.41701	3.83269	0.63169	0.379853
GO:1901016	regulation of potassium ion transmembrane transporter activity	1	818	7	21946	0.233513	0.41701	3.83269	0.63169	0.379853
GO:2001259	positive regulation of cation channel activity	1	818	7	21946	0.233513	0.41701	3.83269	0.63169	0.379853
GO:2001275	positive regulation of glucose import in response to insulin stimulus	1	818	7	21946	0.233513	0.41701	3.83269	0.63169	0.379853
GO:1900119	positive regulation of execution phase of apoptosis	1	818	7	21946	0.233513	0.41701	3.83269	0.63169	0.379853
GO:0006857	oligopeptide transport	1	818	7	21946	0.233513	0.41701	3.83269	0.63169	0.379853
GO:0002035	brain renin-angiotensin system	1	818	7	21946	0.233513	0.41701	3.83269	0.63169	0.379853
GO:1901800	positive regulation of proteasomal protein catabolic process	1	818	7	21946	0.233513	0.41701	3.83269	0.63169	0.379853
GO:0021520	spinal cord motor neuron cell fate specification	1	818	7	21946	0.233513	0.41701	3.83269	0.63169	0.379853
GO:0010886	positive regulation of cholesterol storage	1	818	7	21946	0.233513	0.41701	3.83269	0.63169	0.379853
GO:0070972	protein localization to endoplasmic reticulum	1	818	7	21946	0.233513	0.41701	3.83269	0.63169	0.379853
GO:0001505	regulation of neurotransmitter levels	1	818	7	21946	0.233513	0.41701	3.83269	0.63169	0.379853
GO:0010458	exit from mitosis	1	818	7	21946	0.233513	0.41701	3.83269	0.63169	0.379853
GO:0070914	UV-damage excision repair	1	818	7	21946	0.233513	0.41701	3.83269	0.63169	0.379853
GO:0033572	transferrin transport	1	818	7	21946	0.233513	0.41701	3.83269	0.63169	0.379853
GO:0002821	positive regulation of adaptive immune response	1	818	7	21946	0.233513	0.41701	3.83269	0.63169	0.379853
GO:0032287	peripheral nervous system myelin maintenance	1	818	7	21946	0.233513	0.41701	3.83269	0.63169	0.379853
GO:0015718	monocarboxylic acid transport	1	818	7	21946	0.233513	0.41701	3.83269	0.63169	0.379853
GO:0033129	positive regulation of histone phosphorylation	1	818	7	21946	0.233513	0.41701	3.83269	0.63169	0.379853
GO:0002862	negative regulation of inflammatory response to antigenic stimulus	1	818	7	21946	0.233513	0.41701	3.83269	0.63169	0.379853
GO:0035360	positive regulation of peroxisome proliferator activated receptor signaling pathway	1	818	7	21946	0.233513	0.41701	3.83269	0.63169	0.379853
GO:0002438	acute inflammatory response to antigenic stimulus	1	818	7	21946	0.233513	0.41701	3.83269	0.63169	0.379853
GO:0050912	detection of chemical stimulus involved in sensory perception of taste	1	818	7	21946	0.233513	0.41701	3.83269	0.63169	0.379853
GO:0022029	telencephalon cell migration	1	818	7	21946	0.233513	0.41701	3.83269	0.63169	0.379853
GO:0009062	fatty acid catabolic process	1	818	7	21946	0.233513	0.41701	3.83269	0.63169	0.379853
GO:0060011	Sertoli cell proliferation	1	818	7	21946	0.233513	0.41701	3.83269	0.63169	0.379853
GO:0043931	ossification involved in bone maturation	1	818	7	21946	0.233513	0.41701	3.83269	0.63169	0.379853
GO:0071599	otic vesicle development	1	818	7	21946	0.233513	0.41701	3.83269	0.63169	0.379853
GO:0051988	regulation of attachment of spindle microtubules to kinetochore	1	818	7	21946	0.233513	0.41701	3.83269	0.63169	0.379853
GO:0051155	positive regulation of striated muscle cell differentiation	1	818	7	21946	0.233513	0.41701	3.83269	0.63169	0.379853
GO:0051560	mitochondrial calcium ion homeostasis	1	818	7	21946	0.233513	0.41701	3.83269	0.63169	0.379853
GO:0043951	negative regulation of cAMP-mediated signaling	1	818	7	21946	0.233513	0.41701	3.83269	0.63169	0.379853
GO:0030214	hyaluronan catabolic process	1	818	7	21946	0.233513	0.41701	3.83269	0.63169	0.379853
GO:0006101	citrate metabolic process	1	818	7	21946	0.233513	0.41701	3.83269	0.63169	0.379853
GO:0051101	regulation of DNA binding	1	818	7	21946	0.233513	0.41701	3.83269	0.63169	0.379853
GO:0034983	peptidyl-lysine deacetylation	1	818	7	21946	0.233513	0.41701	3.83269	0.63169	0.379853
GO:0010996	response to auditory stimulus	1	818	7	21946	0.233513	0.41701	3.83269	0.63169	0.379853
GO:0048702	embryonic neurocranium morphogenesis	1	818	7	21946	0.233513	0.41701	3.83269	0.63169	0.379853
GO:0006084	acetyl-CoA metabolic process	1	818	7	21946	0.233513	0.41701	3.83269	0.63169	0.379853
GO:2000727	positive regulation of cardiac muscle cell differentiation	1	818	7	21946	0.233513	0.41701	3.83269	0.63169	0.379853
GO:0001667	ameboidal-type cell migration	1	818	7	21946	0.233513	0.41701	3.83269	0.63169	0.379853
GO:0055075	potassium ion homeostasis	1	818	7	21946	0.233513	0.41701	3.83269	0.63169	0.379853
GO:2000778	positive regulation of interleukin-6 secretion	1	818	7	21946	0.233513	0.41701	3.83269	0.63169	0.379853
GO:0055012	ventricular cardiac muscle cell differentiation	1	818	7	21946	0.233513	0.41701	3.83269	0.63169	0.379853
GO:0060831	smoothened signaling pathway involved in dorsal/ventral neural tube patterning	1	818	7	21946	0.233513	0.41701	3.83269	0.63169	0.379853
GO:0048743	positive regulation of skeletal muscle fiber development	1	818	7	21946	0.233513	0.41701	3.83269	0.63169	0.379853
GO:0050767	regulation of neurogenesis	2	818	25	21946	0.238634	0.422629	2.14631	0.622267	0.37404
GO:0050776	regulation of immune response	2	818	25	21946	0.238634	0.422629	2.14631	0.622267	0.37404
GO:0045746	negative regulation of Notch signaling pathway	2	818	25	21946	0.238634	0.422629	2.14631	0.622267	0.37404
GO:0000462	maturation of SSU-rRNA from tricistronic rRNA transcript (SSU-rRNA, 5.8S rRNA, LSU-rRNA)	2	818	25	21946	0.238634	0.422629	2.14631	0.622267	0.37404
GO:0033344	cholesterol efflux	2	818	25	21946	0.238634	0.422629	2.14631	0.622267	0.37404
GO:0006378	mRNA polyadenylation	2	818	25	21946	0.238634	0.422629	2.14631	0.622267	0.37404
GO:0031214	biomineral tissue development	2	818	25	21946	0.238634	0.422629	2.14631	0.622267	0.37404
GO:0072332	intrinsic apoptotic signaling pathway by p53 class mediator	2	818	25	21946	0.238634	0.422629	2.14631	0.622267	0.37404
GO:0051491	positive regulation of filopodium assembly	2	818	25	21946	0.238634	0.422629	2.14631	0.622267	0.37404
GO:0008637	apoptotic mitochondrial changes	2	818	25	21946	0.238634	0.422629	2.14631	0.622267	0.37404
GO:0021537	telencephalon development	2	818	25	21946	0.238634	0.422629	2.14631	0.622267	0.37404
GO:0045672	positive regulation of osteoclast differentiation	2	818	25	21946	0.238634	0.422629	2.14631	0.622267	0.37404
GO:0033138	positive regulation of peptidyl-serine phosphorylation	4	818	67	21946	0.239581	0.423721	1.60172	0.620548	0.37292
GO:0048661	positive regulation of smooth muscle cell proliferation	4	818	67	21946	0.239581	0.423721	1.60172	0.620548	0.37292
GO:0048538	thymus development	3	818	46	21946	0.245052	0.432503	1.74971	0.610742	0.36401
GO:0048286	lung alveolus development	3	818	46	21946	0.245052	0.432503	1.74971	0.610742	0.36401
GO:0009566	fertilization	3	818	46	21946	0.245052	0.432503	1.74971	0.610742	0.36401
GO:0000165	MAPK cascade	5	818	91	21946	0.251867	0.437046	1.47411	0.598828	0.359473
GO:0008406	gonad development	2	818	26	21946	0.252599	0.437046	2.06376	0.597568	0.359473
GO:0045773	positive regulation of axon extension	2	818	26	21946	0.252599	0.437046	2.06376	0.597568	0.359473
GO:0002040	sprouting angiogenesis	2	818	26	21946	0.252599	0.437046	2.06376	0.597568	0.359473
GO:0034220	ion transmembrane transport	10	818	209	21946	0.254162	0.437046	1.28368	0.59489	0.359473
GO:0043547	positive regulation of GTPase activity	13	818	282	21946	0.255181	0.437046	1.23679	0.593151	0.359473
GO:0060395	SMAD protein signal transduction	4	818	69	21946	0.255919	0.437046	1.5553	0.591897	0.359473
GO:0090090	negative regulation of canonical Wnt signaling pathway	5	818	92	21946	0.258936	0.437046	1.45809	0.586808	0.359473
GO:0006954	inflammatory response	13	818	283	21946	0.25912	0.437046	1.23242	0.586499	0.359473
GO:0032927	positive regulation of activin receptor signaling pathway	1	818	8	21946	0.262091	0.437046	3.35361	0.581547	0.359473
GO:0006623	protein targeting to vacuole	1	818	8	21946	0.262091	0.437046	3.35361	0.581547	0.359473
GO:0050774	negative regulation of dendrite morphogenesis	1	818	8	21946	0.262091	0.437046	3.35361	0.581547	0.359473
GO:0036089	cleavage furrow formation	1	818	8	21946	0.262091	0.437046	3.35361	0.581547	0.359473
GO:0019509	L-methionine biosynthetic process from methylthioadenosine	1	818	8	21946	0.262091	0.437046	3.35361	0.581547	0.359473
GO:0019511	peptidyl-proline hydroxylation	1	818	8	21946	0.262091	0.437046	3.35361	0.581547	0.359473
GO:0016458	gene silencing	1	818	8	21946	0.262091	0.437046	3.35361	0.581547	0.359473
GO:0045838	positive regulation of membrane potential	1	818	8	21946	0.262091	0.437046	3.35361	0.581547	0.359473
GO:0061037	negative regulation of cartilage development	1	818	8	21946	0.262091	0.437046	3.35361	0.581547	0.359473
GO:0003197	endocardial cushion development	1	818	8	21946	0.262091	0.437046	3.35361	0.581547	0.359473
GO:0006220	pyrimidine nucleotide metabolic process	1	818	8	21946	0.262091	0.437046	3.35361	0.581547	0.359473
GO:0042754	negative regulation of circadian rhythm	1	818	8	21946	0.262091	0.437046	3.35361	0.581547	0.359473
GO:0090331	negative regulation of platelet aggregation	1	818	8	21946	0.262091	0.437046	3.35361	0.581547	0.359473
GO:0070723	response to cholesterol	1	818	8	21946	0.262091	0.437046	3.35361	0.581547	0.359473
GO:0051168	nuclear export	1	818	8	21946	0.262091	0.437046	3.35361	0.581547	0.359473
GO:0044406	adhesion of symbiont to host	1	818	8	21946	0.262091	0.437046	3.35361	0.581547	0.359473
GO:0007064	mitotic sister chromatid cohesion	1	818	8	21946	0.262091	0.437046	3.35361	0.581547	0.359473
GO:0031123	RNA 3'-end processing	1	818	8	21946	0.262091	0.437046	3.35361	0.581547	0.359473
GO:0035562	negative regulation of chromatin binding	1	818	8	21946	0.262091	0.437046	3.35361	0.581547	0.359473
GO:0007097	nuclear migration	1	818	8	21946	0.262091	0.437046	3.35361	0.581547	0.359473
GO:0046653	tetrahydrofolate metabolic process	1	818	8	21946	0.262091	0.437046	3.35361	0.581547	0.359473
GO:0002675	positive regulation of acute inflammatory response	1	818	8	21946	0.262091	0.437046	3.35361	0.581547	0.359473
GO:2000480	negative regulation of cAMP-dependent protein kinase activity	1	818	8	21946	0.262091	0.437046	3.35361	0.581547	0.359473
GO:0060235	lens induction in camera-type eye	1	818	8	21946	0.262091	0.437046	3.35361	0.581547	0.359473
GO:0071361	cellular response to ethanol	1	818	8	21946	0.262091	0.437046	3.35361	0.581547	0.359473
GO:0050871	positive regulation of B cell activation	1	818	8	21946	0.262091	0.437046	3.35361	0.581547	0.359473
GO:0071340	skeletal muscle acetylcholine-gated channel clustering	1	818	8	21946	0.262091	0.437046	3.35361	0.581547	0.359473
GO:0006333	chromatin assembly or disassembly	1	818	8	21946	0.262091	0.437046	3.35361	0.581547	0.359473
GO:0097105	presynaptic membrane assembly	1	818	8	21946	0.262091	0.437046	3.35361	0.581547	0.359473
GO:0045955	negative regulation of calcium ion-dependent exocytosis	1	818	8	21946	0.262091	0.437046	3.35361	0.581547	0.359473
GO:0007213	G-protein coupled acetylcholine receptor signaling pathway	1	818	8	21946	0.262091	0.437046	3.35361	0.581547	0.359473
GO:0021513	spinal cord dorsal/ventral patterning	1	818	8	21946	0.262091	0.437046	3.35361	0.581547	0.359473
GO:0007175	negative regulation of epidermal growth factor-activated receptor activity	1	818	8	21946	0.262091	0.437046	3.35361	0.581547	0.359473
GO:0007183	SMAD protein complex assembly	1	818	8	21946	0.262091	0.437046	3.35361	0.581547	0.359473
GO:0001881	receptor recycling	1	818	8	21946	0.262091	0.437046	3.35361	0.581547	0.359473
GO:0045446	endothelial cell differentiation	1	818	8	21946	0.262091	0.437046	3.35361	0.581547	0.359473
GO:0060603	mammary gland duct morphogenesis	1	818	8	21946	0.262091	0.437046	3.35361	0.581547	0.359473
GO:0070886	positive regulation of calcineurin-NFAT signaling cascade	1	818	8	21946	0.262091	0.437046	3.35361	0.581547	0.359473
GO:0034380	high-density lipoprotein particle assembly	1	818	8	21946	0.262091	0.437046	3.35361	0.581547	0.359473
GO:0051403	stress-activated MAPK cascade	1	818	8	21946	0.262091	0.437046	3.35361	0.581547	0.359473
GO:0035372	protein localization to microtubule	1	818	8	21946	0.262091	0.437046	3.35361	0.581547	0.359473
GO:0000288	nuclear-transcribed mRNA catabolic process, deadenylation-dependent decay	1	818	8	21946	0.262091	0.437046	3.35361	0.581547	0.359473
GO:0030916	otic vesicle formation	1	818	8	21946	0.262091	0.437046	3.35361	0.581547	0.359473
GO:0090197	positive regulation of chemokine secretion	1	818	8	21946	0.262091	0.437046	3.35361	0.581547	0.359473
GO:0051026	chiasma assembly	1	818	8	21946	0.262091	0.437046	3.35361	0.581547	0.359473
GO:0008608	attachment of spindle microtubules to kinetochore	1	818	8	21946	0.262091	0.437046	3.35361	0.581547	0.359473
GO:0051444	negative regulation of ubiquitin-protein transferase activity	1	818	8	21946	0.262091	0.437046	3.35361	0.581547	0.359473
GO:0051451	myoblast migration	1	818	8	21946	0.262091	0.437046	3.35361	0.581547	0.359473
GO:0006465	signal peptide processing	1	818	8	21946	0.262091	0.437046	3.35361	0.581547	0.359473
GO:0009437	carnitine metabolic process	1	818	8	21946	0.262091	0.437046	3.35361	0.581547	0.359473
GO:0070988	demethylation	1	818	8	21946	0.262091	0.437046	3.35361	0.581547	0.359473
GO:0010873	positive regulation of cholesterol esterification	1	818	8	21946	0.262091	0.437046	3.35361	0.581547	0.359473
GO:0010884	positive regulation of lipid storage	1	818	8	21946	0.262091	0.437046	3.35361	0.581547	0.359473
GO:0007292	female gamete generation	1	818	8	21946	0.262091	0.437046	3.35361	0.581547	0.359473
GO:0030042	actin filament depolymerization	1	818	8	21946	0.262091	0.437046	3.35361	0.581547	0.359473
GO:0045124	regulation of bone resorption	1	818	8	21946	0.262091	0.437046	3.35361	0.581547	0.359473
GO:0070102	interleukin-6-mediated signaling pathway	1	818	8	21946	0.262091	0.437046	3.35361	0.581547	0.359473
GO:0071421	manganese ion transmembrane transport	1	818	8	21946	0.262091	0.437046	3.35361	0.581547	0.359473
GO:0033169	histone H3-K9 demethylation	1	818	8	21946	0.262091	0.437046	3.35361	0.581547	0.359473
GO:0070544	histone H3-K36 demethylation	1	818	8	21946	0.262091	0.437046	3.35361	0.581547	0.359473
GO:0050671	positive regulation of lymphocyte proliferation	1	818	8	21946	0.262091	0.437046	3.35361	0.581547	0.359473
GO:0019800	peptide cross-linking via chondroitin 4-sulfate glycosaminoglycan	1	818	8	21946	0.262091	0.437046	3.35361	0.581547	0.359473
GO:1900029	positive regulation of ruffle assembly	1	818	8	21946	0.262091	0.437046	3.35361	0.581547	0.359473
GO:0060074	synapse maturation	1	818	8	21946	0.262091	0.437046	3.35361	0.581547	0.359473
GO:0003094	glomerular filtration	1	818	8	21946	0.262091	0.437046	3.35361	0.581547	0.359473
GO:0038166	angiotensin-activated signaling pathway	1	818	8	21946	0.262091	0.437046	3.35361	0.581547	0.359473
GO:0044319	wound healing, spreading of cells	1	818	8	21946	0.262091	0.437046	3.35361	0.581547	0.359473
GO:0000731	DNA synthesis involved in DNA repair	1	818	8	21946	0.262091	0.437046	3.35361	0.581547	0.359473
GO:0045654	positive regulation of megakaryocyte differentiation	1	818	8	21946	0.262091	0.437046	3.35361	0.581547	0.359473
GO:0032786	positive regulation of DNA-templated transcription, elongation	1	818	8	21946	0.262091	0.437046	3.35361	0.581547	0.359473
GO:0010591	regulation of lamellipodium assembly	1	818	8	21946	0.262091	0.437046	3.35361	0.581547	0.359473
GO:0021695	cerebellar cortex development	1	818	8	21946	0.262091	0.437046	3.35361	0.581547	0.359473
GO:0042116	macrophage activation	1	818	8	21946	0.262091	0.437046	3.35361	0.581547	0.359473
GO:0031063	regulation of histone deacetylation	1	818	8	21946	0.262091	0.437046	3.35361	0.581547	0.359473
GO:0031054	pre-miRNA processing	1	818	8	21946	0.262091	0.437046	3.35361	0.581547	0.359473
GO:0001696	gastric acid secretion	1	818	8	21946	0.262091	0.437046	3.35361	0.581547	0.359473
GO:0006417	regulation of translation	6	818	116	21946	0.264779	0.441209	1.3877	0.577117	0.355356
GO:0006810	transport	77	818	1921	21946	0.265173	0.441209	1.07539	0.57647	0.355356
GO:0001657	ureteric bud development	3	818	48	21946	0.265275	0.441209	1.6768	0.576303	0.355356
GO:0001658	branching involved in ureteric bud morphogenesis	3	818	48	21946	0.265275	0.441209	1.6768	0.576303	0.355356
GO:0010718	positive regulation of epithelial to mesenchymal transition	2	818	27	21946	0.266582	0.441951	1.98732	0.57417	0.354626
GO:0035987	endodermal cell differentiation	2	818	27	21946	0.266582	0.441951	1.98732	0.57417	0.354626
GO:0045880	positive regulation of smoothened signaling pathway	2	818	27	21946	0.266582	0.441951	1.98732	0.57417	0.354626
GO:0007269	neurotransmitter secretion	2	818	27	21946	0.266582	0.441951	1.98732	0.57417	0.354626
GO:0019216	regulation of lipid metabolic process	2	818	27	21946	0.266582	0.441951	1.98732	0.57417	0.354626
GO:0060348	bone development	3	818	49	21946	0.275462	0.456085	1.64258	0.559938	0.340955
GO:0009953	dorsal/ventral pattern formation	3	818	49	21946	0.275462	0.456085	1.64258	0.559938	0.340955
GO:0006397	mRNA processing	14	818	313	21946	0.280157	0.457948	1.20001	0.552598	0.339184
GO:0030198	extracellular matrix organization	5	818	95	21946	0.280407	0.457948	1.41204	0.552212	0.339184
GO:2001243	negative regulation of intrinsic apoptotic signaling pathway	2	818	28	21946	0.280562	0.457948	1.91635	0.551971	0.339184
GO:0006406	mRNA export from nucleus	2	818	28	21946	0.280562	0.457948	1.91635	0.551971	0.339184
GO:0070584	mitochondrion morphogenesis	2	818	28	21946	0.280562	0.457948	1.91635	0.551971	0.339184
GO:0051965	positive regulation of synapse assembly	2	818	28	21946	0.280562	0.457948	1.91635	0.551971	0.339184
GO:0045727	positive regulation of translation	3	818	50	21946	0.285687	0.457948	1.60973	0.544109	0.339184
GO:0010212	response to ionizing radiation	3	818	50	21946	0.285687	0.457948	1.60973	0.544109	0.339184
GO:0032092	positive regulation of protein binding	3	818	50	21946	0.285687	0.457948	1.60973	0.544109	0.339184
GO:0048666	neuron development	3	818	50	21946	0.285687	0.457948	1.60973	0.544109	0.339184
GO:0035023	regulation of Rho protein signal transduction	4	818	73	21946	0.289202	0.457948	1.47007	0.538799	0.339184
GO:0032926	negative regulation of activin receptor signaling pathway	1	818	9	21946	0.289606	0.457948	2.98098	0.538193	0.339184
GO:1902533	positive regulation of intracellular signal transduction	1	818	9	21946	0.289606	0.457948	2.98098	0.538193	0.339184
GO:0045806	negative regulation of endocytosis	1	818	9	21946	0.289606	0.457948	2.98098	0.538193	0.339184
GO:0051246	regulation of protein metabolic process	1	818	9	21946	0.289606	0.457948	2.98098	0.538193	0.339184
GO:0010745	negative regulation of macrophage derived foam cell differentiation	1	818	9	21946	0.289606	0.457948	2.98098	0.538193	0.339184
GO:0061032	visceral serous pericardium development	1	818	9	21946	0.289606	0.457948	2.98098	0.538193	0.339184
GO:0007494	midgut development	1	818	9	21946	0.289606	0.457948	2.98098	0.538193	0.339184
GO:0009650	UV protection	1	818	9	21946	0.289606	0.457948	2.98098	0.538193	0.339184
GO:0032000	positive regulation of fatty acid beta-oxidation	1	818	9	21946	0.289606	0.457948	2.98098	0.538193	0.339184
GO:0043569	negative regulation of insulin-like growth factor receptor signaling pathway	1	818	9	21946	0.289606	0.457948	2.98098	0.538193	0.339184
GO:0034219	carbohydrate transmembrane transport	1	818	9	21946	0.289606	0.457948	2.98098	0.538193	0.339184
GO:0032099	negative regulation of appetite	1	818	9	21946	0.289606	0.457948	2.98098	0.538193	0.339184
GO:0046689	response to mercury ion	1	818	9	21946	0.289606	0.457948	2.98098	0.538193	0.339184
GO:0003203	endocardial cushion morphogenesis	1	818	9	21946	0.289606	0.457948	2.98098	0.538193	0.339184
GO:0060670	branching involved in labyrinthine layer morphogenesis	1	818	9	21946	0.289606	0.457948	2.98098	0.538193	0.339184
GO:0061549	sympathetic ganglion development	1	818	9	21946	0.289606	0.457948	2.98098	0.538193	0.339184
GO:0061180	mammary gland epithelium development	1	818	9	21946	0.289606	0.457948	2.98098	0.538193	0.339184
GO:0097120	receptor localization to synapse	1	818	9	21946	0.289606	0.457948	2.98098	0.538193	0.339184
GO:0009312	oligosaccharide biosynthetic process	1	818	9	21946	0.289606	0.457948	2.98098	0.538193	0.339184
GO:0007143	female meiotic division	1	818	9	21946	0.289606	0.457948	2.98098	0.538193	0.339184
GO:0007184	SMAD protein import into nucleus	1	818	9	21946	0.289606	0.457948	2.98098	0.538193	0.339184
GO:0071318	cellular response to ATP	1	818	9	21946	0.289606	0.457948	2.98098	0.538193	0.339184
GO:0035234	ectopic germ cell programmed cell death	1	818	9	21946	0.289606	0.457948	2.98098	0.538193	0.339184
GO:0008088	axon cargo transport	1	818	9	21946	0.289606	0.457948	2.98098	0.538193	0.339184
GO:0043297	apical junction assembly	1	818	9	21946	0.289606	0.457948	2.98098	0.538193	0.339184
GO:0060351	cartilage development involved in endochondral bone morphogenesis	1	818	9	21946	0.289606	0.457948	2.98098	0.538193	0.339184
GO:0005513	detection of calcium ion	1	818	9	21946	0.289606	0.457948	2.98098	0.538193	0.339184
GO:0051893	regulation of focal adhesion assembly	1	818	9	21946	0.289606	0.457948	2.98098	0.538193	0.339184
GO:0003376	sphingosine-1-phosphate signaling pathway	1	818	9	21946	0.289606	0.457948	2.98098	0.538193	0.339184
GO:0009913	epidermal cell differentiation	1	818	9	21946	0.289606	0.457948	2.98098	0.538193	0.339184
GO:0014075	response to amine	1	818	9	21946	0.289606	0.457948	2.98098	0.538193	0.339184
GO:0022900	electron transport chain	1	818	9	21946	0.289606	0.457948	2.98098	0.538193	0.339184
GO:0030516	regulation of axon extension	1	818	9	21946	0.289606	0.457948	2.98098	0.538193	0.339184
GO:0030101	natural killer cell activation	1	818	9	21946	0.289606	0.457948	2.98098	0.538193	0.339184
GO:0042989	sequestering of actin monomers	1	818	9	21946	0.289606	0.457948	2.98098	0.538193	0.339184
GO:0006497	protein lipidation	1	818	9	21946	0.289606	0.457948	2.98098	0.538193	0.339184
GO:0042511	positive regulation of tyrosine phosphorylation of Stat1 protein	1	818	9	21946	0.289606	0.457948	2.98098	0.538193	0.339184
GO:0008593	regulation of Notch signaling pathway	1	818	9	21946	0.289606	0.457948	2.98098	0.538193	0.339184
GO:0030071	regulation of mitotic metaphase/anaphase transition	1	818	9	21946	0.289606	0.457948	2.98098	0.538193	0.339184
GO:0008154	actin polymerization or depolymerization	1	818	9	21946	0.289606	0.457948	2.98098	0.538193	0.339184
GO:0030098	lymphocyte differentiation	1	818	9	21946	0.289606	0.457948	2.98098	0.538193	0.339184
GO:0048667	cell morphogenesis involved in neuron differentiation	1	818	9	21946	0.289606	0.457948	2.98098	0.538193	0.339184
GO:0033173	calcineurin-NFAT signaling cascade	1	818	9	21946	0.289606	0.457948	2.98098	0.538193	0.339184
GO:0022027	interkinetic nuclear migration	1	818	9	21946	0.289606	0.457948	2.98098	0.538193	0.339184
GO:0045116	protein neddylation	1	818	9	21946	0.289606	0.457948	2.98098	0.538193	0.339184
GO:0070286	axonemal dynein complex assembly	1	818	9	21946	0.289606	0.457948	2.98098	0.538193	0.339184
GO:0051533	positive regulation of NFAT protein import into nucleus	1	818	9	21946	0.289606	0.457948	2.98098	0.538193	0.339184
GO:0070257	positive regulation of mucus secretion	1	818	9	21946	0.289606	0.457948	2.98098	0.538193	0.339184
GO:0031960	response to corticosteroid	1	818	9	21946	0.289606	0.457948	2.98098	0.538193	0.339184
GO:0038180	nerve growth factor signaling pathway	1	818	9	21946	0.289606	0.457948	2.98098	0.538193	0.339184
GO:0060056	mammary gland involution	1	818	9	21946	0.289606	0.457948	2.98098	0.538193	0.339184
GO:0003084	positive regulation of systemic arterial blood pressure	1	818	9	21946	0.289606	0.457948	2.98098	0.538193	0.339184
GO:0000733	DNA strand renaturation	1	818	9	21946	0.289606	0.457948	2.98098	0.538193	0.339184
GO:0032319	regulation of Rho GTPase activity	1	818	9	21946	0.289606	0.457948	2.98098	0.538193	0.339184
GO:0032308	positive regulation of prostaglandin secretion	1	818	9	21946	0.289606	0.457948	2.98098	0.538193	0.339184
GO:0017158	regulation of calcium ion-dependent exocytosis	1	818	9	21946	0.289606	0.457948	2.98098	0.538193	0.339184
GO:0070613	regulation of protein processing	1	818	9	21946	0.289606	0.457948	2.98098	0.538193	0.339184
GO:0035871	protein K11-linked deubiquitination	1	818	9	21946	0.289606	0.457948	2.98098	0.538193	0.339184
GO:0033673	negative regulation of kinase activity	1	818	9	21946	0.289606	0.457948	2.98098	0.538193	0.339184
GO:0071539	protein localization to centrosome	1	818	9	21946	0.289606	0.457948	2.98098	0.538193	0.339184
GO:0003417	growth plate cartilage development	1	818	9	21946	0.289606	0.457948	2.98098	0.538193	0.339184
GO:0034116	positive regulation of heterotypic cell-cell adhesion	1	818	9	21946	0.289606	0.457948	2.98098	0.538193	0.339184
GO:0046777	protein autophosphorylation	8	818	168	21946	0.290324	0.458801	1.27756	0.537118	0.338376
GO:0051602	response to electrical stimulus	2	818	29	21946	0.29452	0.463436	1.85027	0.530885	0.334011
GO:0007093	mitotic cell cycle checkpoint	2	818	29	21946	0.29452	0.463436	1.85027	0.530885	0.334011
GO:0007080	mitotic metaphase plate congression	2	818	29	21946	0.29452	0.463436	1.85027	0.530885	0.334011
GO:0007616	long-term memory	2	818	29	21946	0.29452	0.463436	1.85027	0.530885	0.334011
GO:0070509	calcium ion import	2	818	29	21946	0.29452	0.463436	1.85027	0.530885	0.334011
GO:0045664	regulation of neuron differentiation	2	818	29	21946	0.29452	0.463436	1.85027	0.530885	0.334011
GO:0006099	tricarboxylic acid cycle	2	818	29	21946	0.29452	0.463436	1.85027	0.530885	0.334011
GO:0048146	positive regulation of fibroblast proliferation	3	818	51	21946	0.295942	0.464819	1.57817	0.528793	0.332716
GO:0008542	visual learning	3	818	51	21946	0.295942	0.464819	1.57817	0.528793	0.332716
GO:0001541	ovarian follicle development	3	818	51	21946	0.295942	0.464819	1.57817	0.528793	0.332716
GO:0006260	DNA replication	6	818	121	21946	0.296908	0.465785	1.33036	0.527379	0.331815
GO:0043123	positive regulation of I-kappaB kinase/NF-kappaB signaling	7	818	145	21946	0.29692	0.465785	1.29519	0.527361	0.331815
GO:0000902	cell morphogenesis	4	818	74	21946	0.297619	0.466598	1.45021	0.526339	0.331058
GO:0016568	chromatin modification	12	818	268	21946	0.29904	0.468538	1.20129	0.524271	0.329255
GO:0055085	transmembrane transport	20	818	470	21946	0.303161	0.472212	1.14165	0.518326	0.325863
GO:0031175	neuron projection development	6	818	122	21946	0.303426	0.472212	1.31945	0.517947	0.325863
GO:0008152	metabolic process	60	818	1502	21946	0.30495	0.472212	1.07173	0.515771	0.325863
GO:0050769	positive regulation of neurogenesis	2	818	30	21946	0.308438	0.472212	1.78859	0.510832	0.325863
GO:0051209	release of sequestered calcium ion into cytosol	2	818	30	21946	0.308438	0.472212	1.78859	0.510832	0.325863
GO:0050714	positive regulation of protein secretion	2	818	30	21946	0.308438	0.472212	1.78859	0.510832	0.325863
GO:0006730	one-carbon metabolic process	2	818	30	21946	0.308438	0.472212	1.78859	0.510832	0.325863
GO:0045931	positive regulation of mitotic cell cycle	2	818	30	21946	0.308438	0.472212	1.78859	0.510832	0.325863
GO:0006284	base-excision repair	2	818	30	21946	0.308438	0.472212	1.78859	0.510832	0.325863
GO:0009314	response to radiation	2	818	30	21946	0.308438	0.472212	1.78859	0.510832	0.325863
GO:0045840	positive regulation of mitosis	2	818	30	21946	0.308438	0.472212	1.78859	0.510832	0.325863
GO:0010506	regulation of autophagy	2	818	30	21946	0.308438	0.472212	1.78859	0.510832	0.325863
GO:0048709	oligodendrocyte differentiation	2	818	30	21946	0.308438	0.472212	1.78859	0.510832	0.325863
GO:0032321	positive regulation of Rho GTPase activity	5	818	99	21946	0.309536	0.472212	1.35499	0.509289	0.325863
GO:0008285	negative regulation of cell proliferation	15	818	346	21946	0.311261	0.472212	1.1631	0.506875	0.325863
GO:0043086	negative regulation of catalytic activity	4	818	76	21946	0.314538	0.472212	1.41204	0.502328	0.325863
GO:0060122	inner ear receptor stereocilium organization	1	818	10	21946	0.316095	0.472212	2.68289	0.500182	0.325863
GO:0060119	inner ear receptor cell development	1	818	10	21946	0.316095	0.472212	2.68289	0.500182	0.325863
GO:0050765	negative regulation of phagocytosis	1	818	10	21946	0.316095	0.472212	2.68289	0.500182	0.325863
GO:0002262	myeloid cell homeostasis	1	818	10	21946	0.316095	0.472212	2.68289	0.500182	0.325863
GO:0030728	ovulation	1	818	10	21946	0.316095	0.472212	2.68289	0.500182	0.325863
GO:0061053	somite development	1	818	10	21946	0.316095	0.472212	2.68289	0.500182	0.325863
GO:0007530	sex determination	1	818	10	21946	0.316095	0.472212	2.68289	0.500182	0.325863
GO:0003181	atrioventricular valve morphogenesis	1	818	10	21946	0.316095	0.472212	2.68289	0.500182	0.325863
GO:0045839	negative regulation of mitosis	1	818	10	21946	0.316095	0.472212	2.68289	0.500182	0.325863
GO:0061001	regulation of dendritic spine morphogenesis	1	818	10	21946	0.316095	0.472212	2.68289	0.500182	0.325863
GO:0031669	cellular response to nutrient levels	1	818	10	21946	0.316095	0.472212	2.68289	0.500182	0.325863
GO:0032516	positive regulation of phosphoprotein phosphatase activity	1	818	10	21946	0.316095	0.472212	2.68289	0.500182	0.325863
GO:0010744	positive regulation of macrophage derived foam cell differentiation	1	818	10	21946	0.316095	0.472212	2.68289	0.500182	0.325863
GO:0003198	epithelial to mesenchymal transition involved in endocardial cushion formation	1	818	10	21946	0.316095	0.472212	2.68289	0.500182	0.325863
GO:0008343	adult feeding behavior	1	818	10	21946	0.316095	0.472212	2.68289	0.500182	0.325863
GO:0031110	regulation of microtubule polymerization or depolymerization	1	818	10	21946	0.316095	0.472212	2.68289	0.500182	0.325863
GO:0010226	response to lithium ion	1	818	10	21946	0.316095	0.472212	2.68289	0.500182	0.325863
GO:0045742	positive regulation of epidermal growth factor receptor signaling pathway	1	818	10	21946	0.316095	0.472212	2.68289	0.500182	0.325863
GO:0045760	positive regulation of action potential	1	818	10	21946	0.316095	0.472212	2.68289	0.500182	0.325863
GO:0060546	negative regulation of necroptotic process	1	818	10	21946	0.316095	0.472212	2.68289	0.500182	0.325863
GO:0048843	negative regulation of axon extension involved in axon guidance	1	818	10	21946	0.316095	0.472212	2.68289	0.500182	0.325863
GO:0034259	negative regulation of Rho GTPase activity	1	818	10	21946	0.316095	0.472212	2.68289	0.500182	0.325863
GO:0000012	single strand break repair	1	818	10	21946	0.316095	0.472212	2.68289	0.500182	0.325863
GO:0007603	phototransduction, visible light	1	818	10	21946	0.316095	0.472212	2.68289	0.500182	0.325863
GO:0030851	granulocyte differentiation	1	818	10	21946	0.316095	0.472212	2.68289	0.500182	0.325863
GO:0006796	phosphate-containing compound metabolic process	1	818	10	21946	0.316095	0.472212	2.68289	0.500182	0.325863
GO:0006308	DNA catabolic process	1	818	10	21946	0.316095	0.472212	2.68289	0.500182	0.325863
GO:0030431	sleep	1	818	10	21946	0.316095	0.472212	2.68289	0.500182	0.325863
GO:2000505	regulation of energy homeostasis	1	818	10	21946	0.316095	0.472212	2.68289	0.500182	0.325863
GO:0007191	adenylate cyclase-activating dopamine receptor signaling pathway	1	818	10	21946	0.316095	0.472212	2.68289	0.500182	0.325863
GO:0048541	Peyer's patch development	1	818	10	21946	0.316095	0.472212	2.68289	0.500182	0.325863
GO:0035646	endosome to melanosome transport	1	818	10	21946	0.316095	0.472212	2.68289	0.500182	0.325863
GO:0015793	glycerol transport	1	818	10	21946	0.316095	0.472212	2.68289	0.500182	0.325863
GO:0048245	eosinophil chemotaxis	1	818	10	21946	0.316095	0.472212	2.68289	0.500182	0.325863
GO:0006817	phosphate ion transport	1	818	10	21946	0.316095	0.472212	2.68289	0.500182	0.325863
GO:0006884	cell volume homeostasis	1	818	10	21946	0.316095	0.472212	2.68289	0.500182	0.325863
GO:0060314	regulation of ryanodine-sensitive calcium-release channel activity	1	818	10	21946	0.316095	0.472212	2.68289	0.500182	0.325863
GO:0002024	diet induced thermogenesis	1	818	10	21946	0.316095	0.472212	2.68289	0.500182	0.325863
GO:0021612	facial nerve structural organization	1	818	10	21946	0.316095	0.472212	2.68289	0.500182	0.325863
GO:0032740	positive regulation of interleukin-17 production	1	818	10	21946	0.316095	0.472212	2.68289	0.500182	0.325863
GO:0070507	regulation of microtubule cytoskeleton organization	1	818	10	21946	0.316095	0.472212	2.68289	0.500182	0.325863
GO:0006388	tRNA splicing, via endonucleolytic cleavage and ligation	1	818	10	21946	0.316095	0.472212	2.68289	0.500182	0.325863
GO:0032228	regulation of synaptic transmission, GABAergic	1	818	10	21946	0.316095	0.472212	2.68289	0.500182	0.325863
GO:0002827	positive regulation of T-helper 1 type immune response	1	818	10	21946	0.316095	0.472212	2.68289	0.500182	0.325863
GO:0033120	positive regulation of RNA splicing	1	818	10	21946	0.316095	0.472212	2.68289	0.500182	0.325863
GO:0033598	mammary gland epithelial cell proliferation	1	818	10	21946	0.316095	0.472212	2.68289	0.500182	0.325863
GO:0090162	establishment of epithelial cell polarity	1	818	10	21946	0.316095	0.472212	2.68289	0.500182	0.325863
GO:0070528	protein kinase C signaling	1	818	10	21946	0.316095	0.472212	2.68289	0.500182	0.325863
GO:0071850	mitotic cell cycle arrest	1	818	10	21946	0.316095	0.472212	2.68289	0.500182	0.325863
GO:0045576	mast cell activation	1	818	10	21946	0.316095	0.472212	2.68289	0.500182	0.325863
GO:0006809	nitric oxide biosynthetic process	1	818	10	21946	0.316095	0.472212	2.68289	0.500182	0.325863
GO:0034497	protein localization to pre-autophagosomal structure	1	818	10	21946	0.316095	0.472212	2.68289	0.500182	0.325863
GO:0071875	adrenergic receptor signaling pathway	1	818	10	21946	0.316095	0.472212	2.68289	0.500182	0.325863
GO:0033151	V(D)J recombination	1	818	10	21946	0.316095	0.472212	2.68289	0.500182	0.325863
GO:2000252	negative regulation of feeding behavior	1	818	10	21946	0.316095	0.472212	2.68289	0.500182	0.325863
GO:0055091	phospholipid homeostasis	1	818	10	21946	0.316095	0.472212	2.68289	0.500182	0.325863
GO:0051156	glucose 6-phosphate metabolic process	1	818	10	21946	0.316095	0.472212	2.68289	0.500182	0.325863
GO:0060039	pericardium development	1	818	10	21946	0.316095	0.472212	2.68289	0.500182	0.325863
GO:0007435	salivary gland morphogenesis	1	818	10	21946	0.316095	0.472212	2.68289	0.500182	0.325863
GO:0060052	neurofilament cytoskeleton organization	1	818	10	21946	0.316095	0.472212	2.68289	0.500182	0.325863
GO:0048708	astrocyte differentiation	1	818	10	21946	0.316095	0.472212	2.68289	0.500182	0.325863
GO:0006090	pyruvate metabolic process	1	818	10	21946	0.316095	0.472212	2.68289	0.500182	0.325863
GO:0048730	epidermis morphogenesis	1	818	10	21946	0.316095	0.472212	2.68289	0.500182	0.325863
GO:0010172	embryonic body morphogenesis	1	818	10	21946	0.316095	0.472212	2.68289	0.500182	0.325863
GO:0071333	cellular response to glucose stimulus	3	818	53	21946	0.316508	0.472279	1.51861	0.499616	0.325802
GO:0042102	positive regulation of T cell proliferation	3	818	53	21946	0.316508	0.472279	1.51861	0.499616	0.325802
GO:0007218	neuropeptide signaling pathway	5	818	100	21946	0.316887	0.47257	1.34144	0.499096	0.325534
GO:0031122	cytoplasmic microtubule organization	2	818	31	21946	0.3223	0.478144	1.73089	0.491739	0.320441
GO:0016575	histone deacetylation	2	818	31	21946	0.3223	0.478144	1.73089	0.491739	0.320441
GO:0007631	feeding behavior	2	818	31	21946	0.3223	0.478144	1.73089	0.491739	0.320441
GO:0060612	adipose tissue development	2	818	31	21946	0.3223	0.478144	1.73089	0.491739	0.320441
GO:0030501	positive regulation of bone mineralization	2	818	31	21946	0.3223	0.478144	1.73089	0.491739	0.320441
GO:0006506	GPI anchor biosynthetic process	2	818	31	21946	0.3223	0.478144	1.73089	0.491739	0.320441
GO:0008306	associative learning	2	818	31	21946	0.3223	0.478144	1.73089	0.491739	0.320441
GO:0031016	pancreas development	2	818	31	21946	0.3223	0.478144	1.73089	0.491739	0.320441
GO:0060412	ventricular septum morphogenesis	2	818	31	21946	0.3223	0.478144	1.73089	0.491739	0.320441
GO:0009887	organ morphogenesis	5	818	101	21946	0.324259	0.480772	1.32816	0.489108	0.318061
GO:0021766	hippocampus development	3	818	54	21946	0.326802	0.483984	1.49049	0.485715	0.315169
GO:0043408	regulation of MAPK cascade	3	818	54	21946	0.326802	0.483984	1.49049	0.485715	0.315169
GO:0042110	T cell activation	2	818	32	21946	0.336091	0.492546	1.6768	0.473543	0.307553
GO:0048704	embryonic skeletal system morphogenesis	3	818	55	21946	0.337095	0.492546	1.46339	0.472248	0.307553
GO:0001934	positive regulation of protein phosphorylation	7	818	152	21946	0.338896	0.492546	1.23554	0.469933	0.307553
GO:0007417	central nervous system development	4	818	79	21946	0.340053	0.492546	1.35842	0.468454	0.307553
GO:0016446	somatic hypermutation of immunoglobulin genes	1	818	11	21946	0.341598	0.492546	2.43899	0.466484	0.307553
GO:2000177	regulation of neural precursor cell proliferation	1	818	11	21946	0.341598	0.492546	2.43899	0.466484	0.307553
GO:0032940	secretion by cell	1	818	11	21946	0.341598	0.492546	2.43899	0.466484	0.307553
GO:0061003	positive regulation of dendritic spine morphogenesis	1	818	11	21946	0.341598	0.492546	2.43899	0.466484	0.307553
GO:0051223	regulation of protein transport	1	818	11	21946	0.341598	0.492546	2.43899	0.466484	0.307553
GO:0061029	eyelid development in camera-type eye	1	818	11	21946	0.341598	0.492546	2.43899	0.466484	0.307553
GO:0031115	negative regulation of microtubule polymerization	1	818	11	21946	0.341598	0.492546	2.43899	0.466484	0.307553
GO:0030262	apoptotic nuclear changes	1	818	11	21946	0.341598	0.492546	2.43899	0.466484	0.307553
GO:0046641	positive regulation of alpha-beta T cell proliferation	1	818	11	21946	0.341598	0.492546	2.43899	0.466484	0.307553
GO:0032461	positive regulation of protein oligomerization	1	818	11	21946	0.341598	0.492546	2.43899	0.466484	0.307553
GO:0002639	positive regulation of immunoglobulin production	1	818	11	21946	0.341598	0.492546	2.43899	0.466484	0.307553
GO:0048853	forebrain morphogenesis	1	818	11	21946	0.341598	0.492546	2.43899	0.466484	0.307553
GO:0000002	mitochondrial genome maintenance	1	818	11	21946	0.341598	0.492546	2.43899	0.466484	0.307553
GO:0003215	cardiac right ventricle morphogenesis	1	818	11	21946	0.341598	0.492546	2.43899	0.466484	0.307553
GO:0033089	positive regulation of T cell differentiation in thymus	1	818	11	21946	0.341598	0.492546	2.43899	0.466484	0.307553
GO:2000036	regulation of stem cell maintenance	1	818	11	21946	0.341598	0.492546	2.43899	0.466484	0.307553
GO:0045945	positive regulation of transcription from RNA polymerase III promoter	1	818	11	21946	0.341598	0.492546	2.43899	0.466484	0.307553
GO:0010832	negative regulation of myotube differentiation	1	818	11	21946	0.341598	0.492546	2.43899	0.466484	0.307553
GO:0048193	Golgi vesicle transport	1	818	11	21946	0.341598	0.492546	2.43899	0.466484	0.307553
GO:0006264	mitochondrial DNA replication	1	818	11	21946	0.341598	0.492546	2.43899	0.466484	0.307553
GO:0010390	histone monoubiquitination	1	818	11	21946	0.341598	0.492546	2.43899	0.466484	0.307553
GO:0060391	positive regulation of SMAD protein import into nucleus	1	818	11	21946	0.341598	0.492546	2.43899	0.466484	0.307553
GO:2001222	regulation of neuron migration	1	818	11	21946	0.341598	0.492546	2.43899	0.466484	0.307553
GO:0006893	Golgi to plasma membrane transport	1	818	11	21946	0.341598	0.492546	2.43899	0.466484	0.307553
GO:0042535	positive regulation of tumor necrosis factor biosynthetic process	1	818	11	21946	0.341598	0.492546	2.43899	0.466484	0.307553
GO:0008626	granzyme-mediated apoptotic signaling pathway	1	818	11	21946	0.341598	0.492546	2.43899	0.466484	0.307553
GO:0042554	superoxide anion generation	1	818	11	21946	0.341598	0.492546	2.43899	0.466484	0.307553
GO:0030490	maturation of SSU-rRNA	1	818	11	21946	0.341598	0.492546	2.43899	0.466484	0.307553
GO:0070935	3'-UTR-mediated mRNA stabilization	1	818	11	21946	0.341598	0.492546	2.43899	0.466484	0.307553
GO:0001542	ovulation from ovarian follicle	1	818	11	21946	0.341598	0.492546	2.43899	0.466484	0.307553
GO:0050953	sensory perception of light stimulus	1	818	11	21946	0.341598	0.492546	2.43899	0.466484	0.307553
GO:0060484	lung-associated mesenchyme development	1	818	11	21946	0.341598	0.492546	2.43899	0.466484	0.307553
GO:0070233	negative regulation of T cell apoptotic process	1	818	11	21946	0.341598	0.492546	2.43899	0.466484	0.307553
GO:0048333	mesodermal cell differentiation	1	818	11	21946	0.341598	0.492546	2.43899	0.466484	0.307553
GO:0097320	membrane tubulation	1	818	11	21946	0.341598	0.492546	2.43899	0.466484	0.307553
GO:0060068	vagina development	1	818	11	21946	0.341598	0.492546	2.43899	0.466484	0.307553
GO:0006596	polyamine biosynthetic process	1	818	11	21946	0.341598	0.492546	2.43899	0.466484	0.307553
GO:0021670	lateral ventricle development	1	818	11	21946	0.341598	0.492546	2.43899	0.466484	0.307553
GO:0032784	regulation of DNA-templated transcription, elongation	1	818	11	21946	0.341598	0.492546	2.43899	0.466484	0.307553
GO:0033690	positive regulation of osteoblast proliferation	1	818	11	21946	0.341598	0.492546	2.43899	0.466484	0.307553
GO:0070201	regulation of establishment of protein localization	1	818	11	21946	0.341598	0.492546	2.43899	0.466484	0.307553
GO:0046548	retinal rod cell development	1	818	11	21946	0.341598	0.492546	2.43899	0.466484	0.307553
GO:0055015	ventricular cardiac muscle cell development	1	818	11	21946	0.341598	0.492546	2.43899	0.466484	0.307553
GO:0030317	sperm motility	3	818	56	21946	0.347378	0.499478	1.43726	0.459197	0.301484
GO:0043588	skin development	3	818	56	21946	0.347378	0.499478	1.43726	0.459197	0.301484
GO:0050885	neuromuscular process controlling balance	3	818	56	21946	0.347378	0.499478	1.43726	0.459197	0.301484
GO:0008630	intrinsic apoptotic signaling pathway in response to DNA damage	3	818	56	21946	0.347378	0.499478	1.43726	0.459197	0.301484
GO:0042552	myelination	3	818	56	21946	0.347378	0.499478	1.43726	0.459197	0.301484
GO:0008202	steroid metabolic process	4	818	80	21946	0.348577	0.500712	1.34144	0.457702	0.300412
GO:0051281	positive regulation of release of sequestered calcium ion into cytosol	2	818	33	21946	0.349797	0.500712	1.62599	0.456184	0.300412
GO:0042220	response to cocaine	2	818	33	21946	0.349797	0.500712	1.62599	0.456184	0.300412
GO:0046676	negative regulation of insulin secretion	2	818	33	21946	0.349797	0.500712	1.62599	0.456184	0.300412
GO:1902475	L-alpha-amino acid transmembrane transport	2	818	33	21946	0.349797	0.500712	1.62599	0.456184	0.300412
GO:0007157	heterophilic cell-cell adhesion via plasma membrane cell adhesion molecules	2	818	33	21946	0.349797	0.500712	1.62599	0.456184	0.300412
GO:0045494	photoreceptor cell maintenance	2	818	33	21946	0.349797	0.500712	1.62599	0.456184	0.300412
GO:0070555	response to interleukin-1	2	818	33	21946	0.349797	0.500712	1.62599	0.456184	0.300412
GO:0010629	negative regulation of gene expression	8	818	180	21946	0.356995	0.506615	1.19239	0.447338	0.295322
GO:0006644	phospholipid metabolic process	2	818	34	21946	0.363404	0.506615	1.57817	0.43961	0.295322
GO:0071346	cellular response to interferon-gamma	2	818	34	21946	0.363404	0.506615	1.57817	0.43961	0.295322
GO:0007200	phospholipase C-activating G-protein coupled receptor signaling pathway	2	818	34	21946	0.363404	0.506615	1.57817	0.43961	0.295322
GO:0002088	lens development in camera-type eye	2	818	34	21946	0.363404	0.506615	1.57817	0.43961	0.295322
GO:0071456	cellular response to hypoxia	4	818	82	21946	0.365628	0.506615	1.30872	0.43696	0.295322
GO:0030097	hemopoiesis	4	818	82	21946	0.365628	0.506615	1.30872	0.43696	0.295322
GO:0048009	insulin-like growth factor receptor signaling pathway	1	818	12	21946	0.366151	0.506615	2.23574	0.436339	0.295322
GO:2000147	positive regulation of cell motility	1	818	12	21946	0.366151	0.506615	2.23574	0.436339	0.295322
GO:0032930	positive regulation of superoxide anion generation	1	818	12	21946	0.366151	0.506615	2.23574	0.436339	0.295322
GO:0016051	carbohydrate biosynthetic process	1	818	12	21946	0.366151	0.506615	2.23574	0.436339	0.295322
GO:0042756	drinking behavior	1	818	12	21946	0.366151	0.506615	2.23574	0.436339	0.295322
GO:0043116	negative regulation of vascular permeability	1	818	12	21946	0.366151	0.506615	2.23574	0.436339	0.295322
GO:0043129	surfactant homeostasis	1	818	12	21946	0.366151	0.506615	2.23574	0.436339	0.295322
GO:0031571	mitotic G1 DNA damage checkpoint	1	818	12	21946	0.366151	0.506615	2.23574	0.436339	0.295322
GO:0045737	positive regulation of cyclin-dependent protein serine/threonine kinase activity	1	818	12	21946	0.366151	0.506615	2.23574	0.436339	0.295322
GO:0090303	positive regulation of wound healing	1	818	12	21946	0.366151	0.506615	2.23574	0.436339	0.295322
GO:0080111	DNA demethylation	1	818	12	21946	0.366151	0.506615	2.23574	0.436339	0.295322
GO:0070306	lens fiber cell differentiation	1	818	12	21946	0.366151	0.506615	2.23574	0.436339	0.295322
GO:0071625	vocalization behavior	1	818	12	21946	0.366151	0.506615	2.23574	0.436339	0.295322
GO:0006744	ubiquinone biosynthetic process	1	818	12	21946	0.366151	0.506615	2.23574	0.436339	0.295322
GO:0021953	central nervous system neuron differentiation	1	818	12	21946	0.366151	0.506615	2.23574	0.436339	0.295322
GO:0045956	positive regulation of calcium ion-dependent exocytosis	1	818	12	21946	0.366151	0.506615	2.23574	0.436339	0.295322
GO:0060272	embryonic skeletal joint morphogenesis	1	818	12	21946	0.366151	0.506615	2.23574	0.436339	0.295322
GO:0001913	T cell mediated cytotoxicity	1	818	12	21946	0.366151	0.506615	2.23574	0.436339	0.295322
GO:0001817	regulation of cytokine production	1	818	12	21946	0.366151	0.506615	2.23574	0.436339	0.295322
GO:0010763	positive regulation of fibroblast migration	1	818	12	21946	0.366151	0.506615	2.23574	0.436339	0.295322
GO:0035640	exploration behavior	1	818	12	21946	0.366151	0.506615	2.23574	0.436339	0.295322
GO:0031274	positive regulation of pseudopodium assembly	1	818	12	21946	0.366151	0.506615	2.23574	0.436339	0.295322
GO:0045019	negative regulation of nitric oxide biosynthetic process	1	818	12	21946	0.366151	0.506615	2.23574	0.436339	0.295322
GO:0008053	mitochondrial fusion	1	818	12	21946	0.366151	0.506615	2.23574	0.436339	0.295322
GO:0048246	macrophage chemotaxis	1	818	12	21946	0.366151	0.506615	2.23574	0.436339	0.295322
GO:0033197	response to vitamin E	1	818	12	21946	0.366151	0.506615	2.23574	0.436339	0.295322
GO:0060322	head development	1	818	12	21946	0.366151	0.506615	2.23574	0.436339	0.295322
GO:0060394	negative regulation of pathway-restricted SMAD protein phosphorylation	1	818	12	21946	0.366151	0.506615	2.23574	0.436339	0.295322
GO:0007342	fusion of sperm to egg plasma membrane	1	818	12	21946	0.366151	0.506615	2.23574	0.436339	0.295322
GO:0001921	positive regulation of receptor recycling	1	818	12	21946	0.366151	0.506615	2.23574	0.436339	0.295322
GO:0046889	positive regulation of lipid biosynthetic process	1	818	12	21946	0.366151	0.506615	2.23574	0.436339	0.295322
GO:0001935	endothelial cell proliferation	1	818	12	21946	0.366151	0.506615	2.23574	0.436339	0.295322
GO:0033555	multicellular organismal response to stress	1	818	12	21946	0.366151	0.506615	2.23574	0.436339	0.295322
GO:2000406	positive regulation of T cell migration	1	818	12	21946	0.366151	0.506615	2.23574	0.436339	0.295322
GO:0044237	cellular metabolic process	1	818	12	21946	0.366151	0.506615	2.23574	0.436339	0.295322
GO:0030903	notochord development	1	818	12	21946	0.366151	0.506615	2.23574	0.436339	0.295322
GO:0048608	reproductive structure development	1	818	12	21946	0.366151	0.506615	2.23574	0.436339	0.295322
GO:0050927	positive regulation of positive chemotaxis	1	818	12	21946	0.366151	0.506615	2.23574	0.436339	0.295322
GO:2000249	regulation of actin cytoskeleton reorganization	1	818	12	21946	0.366151	0.506615	2.23574	0.436339	0.295322
GO:0043922	negative regulation by host of viral transcription	1	818	12	21946	0.366151	0.506615	2.23574	0.436339	0.295322
GO:0006940	regulation of smooth muscle contraction	1	818	12	21946	0.366151	0.506615	2.23574	0.436339	0.295322
GO:0035058	nonmotile primary cilium assembly	1	818	12	21946	0.366151	0.506615	2.23574	0.436339	0.295322
GO:0060080	regulation of inhibitory postsynaptic membrane potential	1	818	12	21946	0.366151	0.506615	2.23574	0.436339	0.295322
GO:0010613	positive regulation of cardiac muscle hypertrophy	1	818	12	21946	0.366151	0.506615	2.23574	0.436339	0.295322
GO:0043968	histone H2A acetylation	1	818	12	21946	0.366151	0.506615	2.23574	0.436339	0.295322
GO:0030595	leukocyte chemotaxis	1	818	12	21946	0.366151	0.506615	2.23574	0.436339	0.295322
GO:0006091	generation of precursor metabolites and energy	1	818	12	21946	0.366151	0.506615	2.23574	0.436339	0.295322
GO:0097284	hepatocyte apoptotic process	1	818	12	21946	0.366151	0.506615	2.23574	0.436339	0.295322
GO:0051932	synaptic transmission, GABAergic	1	818	12	21946	0.366151	0.506615	2.23574	0.436339	0.295322
GO:0033235	positive regulation of protein sumoylation	1	818	12	21946	0.366151	0.506615	2.23574	0.436339	0.295322
GO:0009142	nucleoside triphosphate biosynthetic process	1	818	12	21946	0.366151	0.506615	2.23574	0.436339	0.295322
GO:0060413	atrial septum morphogenesis	1	818	12	21946	0.366151	0.506615	2.23574	0.436339	0.295322
GO:0043032	positive regulation of macrophage activation	1	818	12	21946	0.366151	0.506615	2.23574	0.436339	0.295322
GO:0055003	cardiac myofibril assembly	1	818	12	21946	0.366151	0.506615	2.23574	0.436339	0.295322
GO:0002548	monocyte chemotaxis	1	818	12	21946	0.366151	0.506615	2.23574	0.436339	0.295322
GO:0006200	ATP catabolic process	11	818	258	21946	0.367856	0.508472	1.14387	0.434322	0.293733
GO:0042733	embryonic digit morphogenesis	3	818	58	21946	0.36789	0.508472	1.3877	0.434282	0.293733
GO:0009790	embryo development	5	818	107	21946	0.368774	0.509147	1.25368	0.433239	0.293157
GO:0001649	osteoblast differentiation	5	818	107	21946	0.368774	0.509147	1.25368	0.433239	0.293157
GO:0016055	Wnt signaling pathway	9	818	208	21946	0.372129	0.513502	1.16086	0.429307	0.289458
GO:0009636	response to toxic substance	4	818	83	21946	0.374147	0.51601	1.29296	0.426958	0.287342
GO:0007268	synaptic transmission	7	818	158	21946	0.375455	0.517309	1.18862	0.425443	0.28625
GO:0045786	negative regulation of cell cycle	2	818	35	21946	0.376902	0.517309	1.53308	0.423771	0.28625
GO:0007254	JNK cascade	2	818	35	21946	0.376902	0.517309	1.53308	0.423771	0.28625
GO:0030073	insulin secretion	2	818	35	21946	0.376902	0.517309	1.53308	0.423771	0.28625
GO:0030901	midbrain development	2	818	35	21946	0.376902	0.517309	1.53308	0.423771	0.28625
GO:0016358	dendrite development	2	818	35	21946	0.376902	0.517309	1.53308	0.423771	0.28625
GO:0048701	embryonic cranial skeleton morphogenesis	2	818	35	21946	0.376902	0.517309	1.53308	0.423771	0.28625
GO:0051924	regulation of calcium ion transport	2	818	35	21946	0.376902	0.517309	1.53308	0.423771	0.28625
GO:0010595	positive regulation of endothelial cell migration	2	818	35	21946	0.376902	0.517309	1.53308	0.423771	0.28625
GO:0001701	in utero embryonic development	12	818	286	21946	0.379146	0.520111	1.12569	0.421193	0.283904
GO:0051028	mRNA transport	4	818	84	21946	0.382657	0.520373	1.27756	0.417191	0.283685
GO:0006914	autophagy	5	818	109	21946	0.383653	0.520373	1.23068	0.416062	0.283685
GO:0045860	positive regulation of protein kinase activity	3	818	60	21946	0.388285	0.520373	1.34144	0.410849	0.283685
GO:0051642	centrosome localization	1	818	13	21946	0.38979	0.520373	2.06376	0.409169	0.283685
GO:0071257	cellular response to electrical stimulus	1	818	13	21946	0.38979	0.520373	2.06376	0.409169	0.283685
GO:0060576	intestinal epithelial cell development	1	818	13	21946	0.38979	0.520373	2.06376	0.409169	0.283685
GO:0036065	fucosylation	1	818	13	21946	0.38979	0.520373	2.06376	0.409169	0.283685
GO:0043616	keratinocyte proliferation	1	818	13	21946	0.38979	0.520373	2.06376	0.409169	0.283685
GO:0021795	cerebral cortex cell migration	1	818	13	21946	0.38979	0.520373	2.06376	0.409169	0.283685
GO:0033762	response to glucagon	1	818	13	21946	0.38979	0.520373	2.06376	0.409169	0.283685
GO:0031103	axon regeneration	1	818	13	21946	0.38979	0.520373	2.06376	0.409169	0.283685
GO:2000649	regulation of sodium ion transmembrane transporter activity	1	818	13	21946	0.38979	0.520373	2.06376	0.409169	0.283685
GO:0001783	B cell apoptotic process	1	818	13	21946	0.38979	0.520373	2.06376	0.409169	0.283685
GO:0045055	regulated secretory pathway	1	818	13	21946	0.38979	0.520373	2.06376	0.409169	0.283685
GO:0042416	dopamine biosynthetic process	1	818	13	21946	0.38979	0.520373	2.06376	0.409169	0.283685
GO:0010812	negative regulation of cell-substrate adhesion	1	818	13	21946	0.38979	0.520373	2.06376	0.409169	0.283685
GO:0010867	positive regulation of triglyceride biosynthetic process	1	818	13	21946	0.38979	0.520373	2.06376	0.409169	0.283685
GO:0001825	blastocyst formation	1	818	13	21946	0.38979	0.520373	2.06376	0.409169	0.283685
GO:0043691	reverse cholesterol transport	1	818	13	21946	0.38979	0.520373	2.06376	0.409169	0.283685
GO:0010389	regulation of G2/M transition of mitotic cell cycle	1	818	13	21946	0.38979	0.520373	2.06376	0.409169	0.283685
GO:0043268	positive regulation of potassium ion transport	1	818	13	21946	0.38979	0.520373	2.06376	0.409169	0.283685
GO:0046325	negative regulation of glucose import	1	818	13	21946	0.38979	0.520373	2.06376	0.409169	0.283685
GO:0061647	histone H3-K9 modification	1	818	13	21946	0.38979	0.520373	2.06376	0.409169	0.283685
GO:0002021	response to dietary excess	1	818	13	21946	0.38979	0.520373	2.06376	0.409169	0.283685
GO:0002087	regulation of respiratory gaseous exchange by neurological system process	1	818	13	21946	0.38979	0.520373	2.06376	0.409169	0.283685
GO:0016239	positive regulation of macroautophagy	1	818	13	21946	0.38979	0.520373	2.06376	0.409169	0.283685
GO:0009992	cellular water homeostasis	1	818	13	21946	0.38979	0.520373	2.06376	0.409169	0.283685
GO:1902358	sulfate transmembrane transport	1	818	13	21946	0.38979	0.520373	2.06376	0.409169	0.283685
GO:0006476	protein deacetylation	1	818	13	21946	0.38979	0.520373	2.06376	0.409169	0.283685
GO:0042523	positive regulation of tyrosine phosphorylation of Stat5 protein	1	818	13	21946	0.38979	0.520373	2.06376	0.409169	0.283685
GO:0007252	I-kappaB phosphorylation	1	818	13	21946	0.38979	0.520373	2.06376	0.409169	0.283685
GO:0032693	negative regulation of interleukin-10 production	1	818	13	21946	0.38979	0.520373	2.06376	0.409169	0.283685
GO:0046855	inositol phosphate dephosphorylation	1	818	13	21946	0.38979	0.520373	2.06376	0.409169	0.283685
GO:0016180	snRNA processing	1	818	13	21946	0.38979	0.520373	2.06376	0.409169	0.283685
GO:0031396	regulation of protein ubiquitination	1	818	13	21946	0.38979	0.520373	2.06376	0.409169	0.283685
GO:0001510	RNA methylation	1	818	13	21946	0.38979	0.520373	2.06376	0.409169	0.283685
GO:0010469	regulation of receptor activity	1	818	13	21946	0.38979	0.520373	2.06376	0.409169	0.283685
GO:0071425	hematopoietic stem cell proliferation	1	818	13	21946	0.38979	0.520373	2.06376	0.409169	0.283685
GO:0050673	epithelial cell proliferation	1	818	13	21946	0.38979	0.520373	2.06376	0.409169	0.283685
GO:0006996	organelle organization	1	818	13	21946	0.38979	0.520373	2.06376	0.409169	0.283685
GO:0019432	triglyceride biosynthetic process	1	818	13	21946	0.38979	0.520373	2.06376	0.409169	0.283685
GO:0030206	chondroitin sulfate biosynthetic process	1	818	13	21946	0.38979	0.520373	2.06376	0.409169	0.283685
GO:0051593	response to folic acid	1	818	13	21946	0.38979	0.520373	2.06376	0.409169	0.283685
GO:0033700	phospholipid efflux	1	818	13	21946	0.38979	0.520373	2.06376	0.409169	0.283685
GO:0060828	regulation of canonical Wnt signaling pathway	1	818	13	21946	0.38979	0.520373	2.06376	0.409169	0.283685
GO:0045670	regulation of osteoclast differentiation	1	818	13	21946	0.38979	0.520373	2.06376	0.409169	0.283685
GO:0043069	negative regulation of programmed cell death	1	818	13	21946	0.38979	0.520373	2.06376	0.409169	0.283685
GO:0043087	regulation of GTPase activity	1	818	13	21946	0.38979	0.520373	2.06376	0.409169	0.283685
GO:0006910	phagocytosis, recognition	1	818	13	21946	0.38979	0.520373	2.06376	0.409169	0.283685
GO:0006635	fatty acid beta-oxidation	2	818	36	21946	0.39028	0.520373	1.49049	0.408624	0.283685
GO:0071391	cellular response to estrogen stimulus	2	818	36	21946	0.39028	0.520373	1.49049	0.408624	0.283685
GO:0048565	digestive tract development	2	818	36	21946	0.39028	0.520373	1.49049	0.408624	0.283685
GO:0008643	carbohydrate transport	2	818	36	21946	0.39028	0.520373	1.49049	0.408624	0.283685
GO:0048662	negative regulation of smooth muscle cell proliferation	2	818	36	21946	0.39028	0.520373	1.49049	0.408624	0.283685
GO:0060070	canonical Wnt signaling pathway	4	818	85	21946	0.391153	0.521266	1.26253	0.407654	0.28294
GO:0006461	protein complex assembly	3	818	61	21946	0.398424	0.530526	1.31945	0.399654	0.275293
GO:0007166	cell surface receptor signaling pathway	5	818	111	21946	0.398514	0.530526	1.20851	0.399556	0.275293
GO:0007528	neuromuscular junction development	2	818	37	21946	0.403527	0.532909	1.45021	0.394128	0.273347
GO:0006665	sphingolipid metabolic process	2	818	37	21946	0.403527	0.532909	1.45021	0.394128	0.273347
GO:0032508	DNA duplex unwinding	2	818	37	21946	0.403527	0.532909	1.45021	0.394128	0.273347
GO:0030968	endoplasmic reticulum unfolded protein response	2	818	37	21946	0.403527	0.532909	1.45021	0.394128	0.273347
GO:0031424	keratinization	2	818	37	21946	0.403527	0.532909	1.45021	0.394128	0.273347
GO:0007265	Ras protein signal transduction	2	818	37	21946	0.403527	0.532909	1.45021	0.394128	0.273347
GO:0007623	circadian rhythm	5	818	112	21946	0.405932	0.532909	1.19772	0.391546	0.273347
GO:0030326	embryonic limb morphogenesis	3	818	62	21946	0.408516	0.532909	1.29817	0.388791	0.273347
GO:0048839	inner ear development	3	818	62	21946	0.408516	0.532909	1.29817	0.388791	0.273347
GO:0018108	peptidyl-tyrosine phosphorylation	6	818	138	21946	0.409761	0.532909	1.16647	0.387469	0.273347
GO:0048488	synaptic vesicle endocytosis	1	818	14	21946	0.412548	0.532909	1.91635	0.384526	0.273347
GO:0048011	neurotrophin TRK receptor signaling pathway	1	818	14	21946	0.412548	0.532909	1.91635	0.384526	0.273347
GO:0042711	maternal behavior	1	818	14	21946	0.412548	0.532909	1.91635	0.384526	0.273347
GO:0035136	forelimb morphogenesis	1	818	14	21946	0.412548	0.532909	1.91635	0.384526	0.273347
GO:0007588	excretion	1	818	14	21946	0.412548	0.532909	1.91635	0.384526	0.273347
GO:0043586	tongue development	1	818	14	21946	0.412548	0.532909	1.91635	0.384526	0.273347
GO:0032438	melanosome organization	1	818	14	21946	0.412548	0.532909	1.91635	0.384526	0.273347
GO:0009651	response to salt stress	1	818	14	21946	0.412548	0.532909	1.91635	0.384526	0.273347
GO:0001736	establishment of planar polarity	1	818	14	21946	0.412548	0.532909	1.91635	0.384526	0.273347
GO:0072520	seminiferous tubule development	1	818	14	21946	0.412548	0.532909	1.91635	0.384526	0.273347
GO:0001779	natural killer cell differentiation	1	818	14	21946	0.412548	0.532909	1.91635	0.384526	0.273347
GO:0043149	stress fiber assembly	1	818	14	21946	0.412548	0.532909	1.91635	0.384526	0.273347
GO:0060979	vasculogenesis involved in coronary vascular morphogenesis	1	818	14	21946	0.412548	0.532909	1.91635	0.384526	0.273347
GO:0071397	cellular response to cholesterol	1	818	14	21946	0.412548	0.532909	1.91635	0.384526	0.273347
GO:0007610	behavior	1	818	14	21946	0.412548	0.532909	1.91635	0.384526	0.273347
GO:0016574	histone ubiquitination	1	818	14	21946	0.412548	0.532909	1.91635	0.384526	0.273347
GO:0060216	definitive hemopoiesis	1	818	14	21946	0.412548	0.532909	1.91635	0.384526	0.273347
GO:0030837	negative regulation of actin filament polymerization	1	818	14	21946	0.412548	0.532909	1.91635	0.384526	0.273347
GO:0006337	nucleosome disassembly	1	818	14	21946	0.412548	0.532909	1.91635	0.384526	0.273347
GO:0006790	sulfur compound metabolic process	1	818	14	21946	0.412548	0.532909	1.91635	0.384526	0.273347
GO:0007210	serotonin receptor signaling pathway	1	818	14	21946	0.412548	0.532909	1.91635	0.384526	0.273347
GO:0050482	arachidonic acid secretion	1	818	14	21946	0.412548	0.532909	1.91635	0.384526	0.273347
GO:0001823	mesonephros development	1	818	14	21946	0.412548	0.532909	1.91635	0.384526	0.273347
GO:0018279	protein N-linked glycosylation via asparagine	1	818	14	21946	0.412548	0.532909	1.91635	0.384526	0.273347
GO:0002755	MyD88-dependent toll-like receptor signaling pathway	1	818	14	21946	0.412548	0.532909	1.91635	0.384526	0.273347
GO:0061512	protein localization to cilium	1	818	14	21946	0.412548	0.532909	1.91635	0.384526	0.273347
GO:0071498	cellular response to fluid shear stress	1	818	14	21946	0.412548	0.532909	1.91635	0.384526	0.273347
GO:2000353	positive regulation of endothelial cell apoptotic process	1	818	14	21946	0.412548	0.532909	1.91635	0.384526	0.273347
GO:0048255	mRNA stabilization	1	818	14	21946	0.412548	0.532909	1.91635	0.384526	0.273347
GO:0042953	lipoprotein transport	1	818	14	21946	0.412548	0.532909	1.91635	0.384526	0.273347
GO:0048699	generation of neurons	1	818	14	21946	0.412548	0.532909	1.91635	0.384526	0.273347
GO:0060347	heart trabecula formation	1	818	14	21946	0.412548	0.532909	1.91635	0.384526	0.273347
GO:0030520	intracellular estrogen receptor signaling pathway	1	818	14	21946	0.412548	0.532909	1.91635	0.384526	0.273347
GO:0051443	positive regulation of ubiquitin-protein transferase activity	1	818	14	21946	0.412548	0.532909	1.91635	0.384526	0.273347
GO:0007340	acrosome reaction	1	818	14	21946	0.412548	0.532909	1.91635	0.384526	0.273347
GO:0042993	positive regulation of transcription factor import into nucleus	1	818	14	21946	0.412548	0.532909	1.91635	0.384526	0.273347
GO:0001953	negative regulation of cell-matrix adhesion	1	818	14	21946	0.412548	0.532909	1.91635	0.384526	0.273347
GO:0010880	regulation of release of sequestered calcium ion into cytosol by sarcoplasmic reticulum	1	818	14	21946	0.412548	0.532909	1.91635	0.384526	0.273347
GO:0001963	synaptic transmission, dopaminergic	1	818	14	21946	0.412548	0.532909	1.91635	0.384526	0.273347
GO:0048665	neuron fate specification	1	818	14	21946	0.412548	0.532909	1.91635	0.384526	0.273347
GO:0042059	negative regulation of epidermal growth factor receptor signaling pathway	1	818	14	21946	0.412548	0.532909	1.91635	0.384526	0.273347
GO:0010038	response to metal ion	1	818	14	21946	0.412548	0.532909	1.91635	0.384526	0.273347
GO:0051146	striated muscle cell differentiation	1	818	14	21946	0.412548	0.532909	1.91635	0.384526	0.273347
GO:0032886	regulation of microtubule-based process	1	818	14	21946	0.412548	0.532909	1.91635	0.384526	0.273347
GO:0043950	positive regulation of cAMP-mediated signaling	1	818	14	21946	0.412548	0.532909	1.91635	0.384526	0.273347
GO:0035909	aorta morphogenesis	1	818	14	21946	0.412548	0.532909	1.91635	0.384526	0.273347
GO:0008272	sulfate transport	1	818	14	21946	0.412548	0.532909	1.91635	0.384526	0.273347
GO:0019395	fatty acid oxidation	1	818	14	21946	0.412548	0.532909	1.91635	0.384526	0.273347
GO:0048715	negative regulation of oligodendrocyte differentiation	1	818	14	21946	0.412548	0.532909	1.91635	0.384526	0.273347
GO:0071277	cellular response to calcium ion	2	818	38	21946	0.416635	0.536838	1.41204	0.380245	0.270157
GO:0031647	regulation of protein stability	2	818	38	21946	0.416635	0.536838	1.41204	0.380245	0.270157
GO:0048167	regulation of synaptic plasticity	2	818	38	21946	0.416635	0.536838	1.41204	0.380245	0.270157
GO:0043407	negative regulation of MAP kinase activity	2	818	38	21946	0.416635	0.536838	1.41204	0.380245	0.270157
GO:0043473	pigmentation	2	818	38	21946	0.416635	0.536838	1.41204	0.380245	0.270157
GO:0046330	positive regulation of JNK cascade	3	818	63	21946	0.418556	0.539043	1.27756	0.378246	0.268376
GO:0042384	cilium assembly	5	818	114	21946	0.420731	0.541573	1.1767	0.375995	0.266343
GO:0010811	positive regulation of cell-substrate adhesion	2	818	39	21946	0.429596	0.550685	1.37584	0.36694	0.259096
GO:0048490	anterograde synaptic vesicle transport	1	818	15	21946	0.434458	0.550685	1.78859	0.362052	0.259096
GO:0002230	positive regulation of defense response to virus by host	1	818	15	21946	0.434458	0.550685	1.78859	0.362052	0.259096
GO:2000179	positive regulation of neural precursor cell proliferation	1	818	15	21946	0.434458	0.550685	1.78859	0.362052	0.259096
[truncated: 569 more rows]

## Sheet: DownGO2Gene
Supplementary Table 3. The biological functions of DMRs in whole genome using GO enrichment analysis.
GOID	GOTerm	QueryID	Symbol	Description	P-Value	FDR	Enrichment
GO:0007275	multicellular organismal development	Sema3e	Sema3e	Semaphorin-3E	3.13505e-05	0.0805081	1.6953
GO:0007275	multicellular organismal development	Mecom	Mecom	Evi1 protein	3.13505e-05	0.0805081	1.6953
GO:0007275	multicellular organismal development	Hoxc6	Hoxc6	Homeobox C6	3.13505e-05	0.0805081	1.6953
GO:0007275	multicellular organismal development	Itgav	Itgav	Integrin alpha-V	3.13505e-05	0.0805081	1.6953
GO:0007275	multicellular organismal development	Tlk2	Tlk2	Serine/threonine-protein kinase tousled-like 2	3.13505e-05	0.0805081	1.6953
GO:0007275	multicellular organismal development	Shisa2	Shisa2	Protein shisa-2 homolog	3.13505e-05	0.0805081	1.6953
GO:0007275	multicellular organismal development	Id2	Id2	DNA-binding protein inhibitor ID-2	3.13505e-05	0.0805081	1.6953
GO:0007275	multicellular organismal development	Sema3a	Sema3a	Semaphorin-3A	3.13505e-05	0.0805081	1.6953
GO:0007275	multicellular organismal development	Ina	Ina	Alpha-internexin	3.13505e-05	0.0805081	1.6953
GO:0007275	multicellular organismal development	D1Pas1	D1Pas1	DNA segment, Chr 1, Pasteur Institute 1	3.13505e-05	0.0805081	1.6953
GO:0007275	multicellular organismal development	Dact2	Dact2	Dapper homolog 2	3.13505e-05	0.0805081	1.6953
GO:0007275	multicellular organismal development	Slc7a5	Slc7a5	Putative uncharacterized protein	3.13505e-05	0.0805081	1.6953
GO:0007275	multicellular organismal development	Vegfb	Vegfb	Vascular endothelial growth factor B	3.13505e-05	0.0805081	1.6953
GO:0007275	multicellular organismal development	Atrnl1	Atrnl1	Attractin-like protein 1	3.13505e-05	0.0805081	1.6953
GO:0007275	multicellular organismal development	Slc22a16	Slc22a16	MCG123504	3.13505e-05	0.0805081	1.6953
GO:0007275	multicellular organismal development	Sirt1	Sirt1	Sirt1 protein	3.13505e-05	0.0805081	1.6953
GO:0007275	multicellular organismal development	Hey2	Hey2	Hairy/enhancer-of-split related with YRPW motif 2	3.13505e-05	0.0805081	1.6953
GO:0007275	multicellular organismal development	Tcf4	Tcf4	Transcription factor 4	3.13505e-05	0.0805081	1.6953
GO:0007275	multicellular organismal development	Xbp1	Xbp1	X-box-binding protein 1	3.13505e-05	0.0805081	1.6953
GO:0007275	multicellular organismal development	Dzip1	Dzip1	Putative uncharacterized protein	3.13505e-05	0.0805081	1.6953
GO:0007275	multicellular organismal development	Vwc2l	Vwc2l	von Willebrand factor C domain-containing protein 2-like	3.13505e-05	0.0805081	1.6953
GO:0007275	multicellular organismal development	Grem2	Grem2	Gremlin-2	3.13505e-05	0.0805081	1.6953
GO:0007275	multicellular organismal development	Ahctf1	Ahctf1	Protein ELYS	3.13505e-05	0.0805081	1.6953
GO:0007275	multicellular organismal development	C1galt1	C1galt1	Glycoprotein-N-acetylgalactosamine 3-beta-galactosyltransferase 1	3.13505e-05	0.0805081	1.6953
GO:0007275	multicellular organismal development	Twf2	Twf2	Twinfilin-2	3.13505e-05	0.0805081	1.6953
GO:0007275	multicellular organismal development	Hesx1	Hesx1	Homeobox expressed in ES cells 1	3.13505e-05	0.0805081	1.6953
GO:0007275	multicellular organismal development	Frzb	Frzb	Secreted frizzled-related protein 3	3.13505e-05	0.0805081	1.6953
GO:0007275	multicellular organismal development	Sox6	Sox6	Transcription factor SOX-6	3.13505e-05	0.0805081	1.6953
GO:0007275	multicellular organismal development	Siah2	Siah2	E3 ubiquitin-protein ligase SIAH2	3.13505e-05	0.0805081	1.6953
GO:0007275	multicellular organismal development	Zic5	Zic5	Zinc finger protein ZIC 5	3.13505e-05	0.0805081	1.6953
GO:0007275	multicellular organismal development	Akt2	Akt2	RAC-beta serine/threonine-protein kinase	3.13505e-05	0.0805081	1.6953
GO:0007275	multicellular organismal development	Noto	Noto	Homeobox protein notochord	3.13505e-05	0.0805081	1.6953
GO:0007275	multicellular organismal development	Barhl2	Barhl2	Barhl2 protein	3.13505e-05	0.0805081	1.6953
GO:0007275	multicellular organismal development	Sema4b	Sema4b	Semaphorin-4B	3.13505e-05	0.0805081	1.6953
GO:0007275	multicellular organismal development	Theg	Theg	Testicular haploid expressed gene protein	3.13505e-05	0.0805081	1.6953
GO:0007275	multicellular organismal development	Disc1	Disc1	Disrupted in schizophrenia 1 homolog	3.13505e-05	0.0805081	1.6953
GO:0007275	multicellular organismal development	Wnt2	Wnt2	Protein Wnt-2	3.13505e-05	0.0805081	1.6953
GO:0007275	multicellular organismal development	Triml1	Triml1	cDNA sequence BC050188, isoform CRA_b	3.13505e-05	0.0805081	1.6953
GO:0007275	multicellular organismal development	Spry2	Spry2	Sprouty homolog 2 (Drosophila)	3.13505e-05	0.0805081	1.6953
GO:0007275	multicellular organismal development	Mdga1	Mdga1	MAM domain-containing glycosylphosphatidylinositol anchor protein 1	3.13505e-05	0.0805081	1.6953
GO:0007275	multicellular organismal development	Setdb2	Setdb2	Histone-lysine N-methyltransferase SETDB2	3.13505e-05	0.0805081	1.6953
GO:0007275	multicellular organismal development	Mitf	Mitf	Microphthalmia-associated transcription factor B isoform	3.13505e-05	0.0805081	1.6953
GO:0007275	multicellular organismal development	Eda2r	Eda2r	Eda2r protein	3.13505e-05	0.0805081	1.6953
GO:0007275	multicellular organismal development	Six1	Six1	Putative uncharacterized protein	3.13505e-05	0.0805081	1.6953
GO:0007275	multicellular organismal development	Hey1	Hey1	Putative uncharacterized protein	3.13505e-05	0.0805081	1.6953
GO:0007275	multicellular organismal development	Ddx4	Ddx4	DEAD box polypeptide 4	3.13505e-05	0.0805081	1.6953
GO:0007275	multicellular organismal development	Fgf9	Fgf9	Fibroblast growth factor 9	3.13505e-05	0.0805081	1.6953
GO:0007275	multicellular organismal development	Meis1	Meis1	Homeobox protein Meis1	3.13505e-05	0.0805081	1.6953
GO:0007275	multicellular organismal development	Shox2	Shox2	Short stature homeobox protein 2	3.13505e-05	0.0805081	1.6953
GO:0007275	multicellular organismal development	Gcm1	Gcm1	Chorion-specific transcription factor GCMa	3.13505e-05	0.0805081	1.6953
GO:0007275	multicellular organismal development	Dab1	Dab1	Disabled homolog 1 (Drosophila), isoform CRA_a	3.13505e-05	0.0805081	1.6953
GO:0007275	multicellular organismal development	Mkx	Mkx	Mohawk homeobox	3.13505e-05	0.0805081	1.6953
GO:0007275	multicellular organismal development	Strbp	Strbp	Spermatid perinuclear RNA-binding protein	3.13505e-05	0.0805081	1.6953
GO:0007275	multicellular organismal development	Kdm1a	Kdm1a	Lysine-specific histone demethylase 1A	3.13505e-05	0.0805081	1.6953
GO:0007275	multicellular organismal development	Robo1	Robo1	Roundabout homolog 1	3.13505e-05	0.0805081	1.6953
GO:0007275	multicellular organismal development	Casz1	Casz1	Zinc finger protein castor homolog 1	3.13505e-05	0.0805081	1.6953
GO:0007275	multicellular organismal development	Olig1	Olig1	Putative uncharacterized protein	3.13505e-05	0.0805081	1.6953
GO:0007275	multicellular organismal development	Six3	Six3	Homeobox protein SIX3	3.13505e-05	0.0805081	1.6953
GO:0007275	multicellular organismal development	Chl1	Chl1	Neural cell adhesion molecule L1-like protein	3.13505e-05	0.0805081	1.6953
GO:0007275	multicellular organismal development	Plxdc2	Plxdc2	Plexin domain-containing protein 2	3.13505e-05	0.0805081	1.6953
GO:0007275	multicellular organismal development	Dkk4	Dkk4	Dickkopf-related protein 4	3.13505e-05	0.0805081	1.6953
GO:0007275	multicellular organismal development	Spesp1	Spesp1	Sperm equatorial segment protein 1	3.13505e-05	0.0805081	1.6953
GO:0007275	multicellular organismal development	Zfp35	Zfp35	Mszf20-1	3.13505e-05	0.0805081	1.6953
GO:0007399	nervous system development	Nrg1	Nrg1	Type III neuregulin 1	7.88048e-05	0.101185	2.17937
GO:0007399	nervous system development	Sema3e	Sema3e	Semaphorin-3E	7.88048e-05	0.101185	2.17937
GO:0007399	nervous system development	Gfra1	Gfra1	Glial cell line derived neurotrophic factor family receptor alpha 1	7.88048e-05	0.101185	2.17937
GO:0007399	nervous system development	Shank1	Shank1	SH3 and multiple ankyrin repeat domains protein 1	7.88048e-05	0.101185	2.17937
GO:0007399	nervous system development	Nlgn1	Nlgn1	Neuroligin-1	7.88048e-05	0.101185	2.17937
GO:0007399	nervous system development	Fos	Fos	Proto-oncogene c-Fos	7.88048e-05	0.101185	2.17937
GO:0007399	nervous system development	Sema3a	Sema3a	Semaphorin-3A	7.88048e-05	0.101185	2.17937
GO:0007399	nervous system development	Ina	Ina	Alpha-internexin	7.88048e-05	0.101185	2.17937
GO:0007399	nervous system development	Cdc42	Cdc42	Cell division control protein 42 homolog	7.88048e-05	0.101185	2.17937
GO:0007399	nervous system development	Slc7a5	Slc7a5	Putative uncharacterized protein	7.88048e-05	0.101185	2.17937
GO:0007399	nervous system development	Smarce1	Smarce1	Smarce1 variant 3	7.88048e-05	0.101185	2.17937
GO:0007399	nervous system development	Tcf4	Tcf4	Transcription factor 4	7.88048e-05	0.101185	2.17937
GO:0007399	nervous system development	Gal	Gal	Galanin peptides	7.88048e-05	0.101185	2.17937
GO:0007399	nervous system development	Zic5	Zic5	Zinc finger protein ZIC 5	7.88048e-05	0.101185	2.17937
GO:0007399	nervous system development	Kalrn	Kalrn	Kalirin	7.88048e-05	0.101185	2.17937
GO:0007399	nervous system development	Srrm4	Srrm4	Serine/arginine repetitive matrix protein 4	7.88048e-05	0.101185	2.17937
GO:0007399	nervous system development	Barhl2	Barhl2	Barhl2 protein	7.88048e-05	0.101185	2.17937
GO:0007399	nervous system development	Sema4b	Sema4b	Semaphorin-4B	7.88048e-05	0.101185	2.17937
GO:0007399	nervous system development	Disc1	Disc1	Disrupted in schizophrenia 1 homolog	7.88048e-05	0.101185	2.17937
GO:0007399	nervous system development	Lmtk2	Lmtk2	Serine/threonine-protein kinase LMTK2	7.88048e-05	0.101185	2.17937
GO:0007399	nervous system development	Epha5	Epha5	Receptor protein-tyrosine kinase	7.88048e-05	0.101185	2.17937
GO:0007399	nervous system development	Mdga1	Mdga1	MAM domain-containing glycosylphosphatidylinositol anchor protein 1	7.88048e-05	0.101185	2.17937
GO:0007399	nervous system development	Brinp3	Brinp3	BMP/retinoic acid-inducible neural-specific protein 3	7.88048e-05	0.101185	2.17937
GO:0007399	nervous system development	Prkd1	Prkd1	Serine/threonine-protein kinase D1	7.88048e-05	0.101185	2.17937
GO:0007399	nervous system development	Lhx2	Lhx2	LIM/homeobox protein Lhx2	7.88048e-05	0.101185	2.17937
GO:0007399	nervous system development	Dab1	Dab1	Disabled homolog 1 (Drosophila), isoform CRA_a	7.88048e-05	0.101185	2.17937
GO:0007399	nervous system development	Robo1	Robo1	Roundabout homolog 1	7.88048e-05	0.101185	2.17937
GO:0007399	nervous system development	Magi2	Magi2	Putative uncharacterized protein	7.88048e-05	0.101185	2.17937
GO:0007399	nervous system development	Chl1	Chl1	Neural cell adhesion molecule L1-like protein	7.88048e-05	0.101185	2.17937
GO:0061157	mRNA destabilization	Mettl14	Mettl14	N6-adenosine-methyltransferase subunit METTL14	0.000200655	0.12882	20.1216
GO:0061157	mRNA destabilization	Cnot6l	Cnot6l	CCR4-NOT transcription complex subunit 6-like	0.000200655	0.12882	20.1216
GO:0061157	mRNA destabilization	Mettl3	Mettl3	N6-adenosine-methyltransferase subunit METTL3	0.000200655	0.12882	20.1216
GO:0034391	regulation of smooth muscle cell apoptotic process	Pde1a	Pde1a	Calcium/calmodulin-dependent 3',5'-cyclic nucleotide phosphodiesterase 1A	0.000200655	0.12882	20.1216
GO:0034391	regulation of smooth muscle cell apoptotic process	Sirt1	Sirt1	Sirt1 protein	0.000200655	0.12882	20.1216
GO:0034391	regulation of smooth muscle cell apoptotic process	Agtr1a	Agtr1a	Type-1A angiotensin II receptor	0.000200655	0.12882	20.1216
GO:0030154	cell differentiation	Tenm3	Tenm3	Odz3 protein	0.000304542	0.156413	1.70932
GO:0030154	cell differentiation	Sema3e	Sema3e	Semaphorin-3E	0.000304542	0.156413	1.70932
GO:0030154	cell differentiation	Mecom	Mecom	Evi1 protein	0.000304542	0.156413	1.70932
GO:0030154	cell differentiation	Caprin1	Caprin1	Caprin1 protein	0.000304542	0.156413	1.70932
GO:0030154	cell differentiation	Itgav	Itgav	Integrin alpha-V	0.000304542	0.156413	1.70932
GO:0030154	cell differentiation	Tlk2	Tlk2	Serine/threonine-protein kinase tousled-like 2	0.000304542	0.156413	1.70932
GO:0030154	cell differentiation	Shank1	Shank1	SH3 and multiple ankyrin repeat domains protein 1	0.000304542	0.156413	1.70932
GO:0030154	cell differentiation	Rasgrp4	Rasgrp4	RAS guanyl-releasing protein 4	0.000304542	0.156413	1.70932
GO:0030154	cell differentiation	Sema3a	Sema3a	Semaphorin-3A	0.000304542	0.156413	1.70932
GO:0030154	cell differentiation	Ina	Ina	Alpha-internexin	0.000304542	0.156413	1.70932
GO:0030154	cell differentiation	D1Pas1	D1Pas1	DNA segment, Chr 1, Pasteur Institute 1	0.000304542	0.156413	1.70932
GO:0030154	cell differentiation	Cdc42	Cdc42	Cell division control protein 42 homolog	0.000304542	0.156413	1.70932
GO:0030154	cell differentiation	Slc7a5	Slc7a5	Putative uncharacterized protein	0.000304542	0.156413	1.70932
GO:0030154	cell differentiation	Vegfb	Vegfb	Vascular endothelial growth factor B	0.000304542	0.156413	1.70932
GO:0030154	cell differentiation	Slc22a16	Slc22a16	MCG123504	0.000304542	0.156413	1.70932
GO:0030154	cell differentiation	Sirt1	Sirt1	Sirt1 protein	0.000304542	0.156413	1.70932
GO:0030154	cell differentiation	Tcf4	Tcf4	Transcription factor 4	0.000304542	0.156413	1.70932
GO:0030154	cell differentiation	Xbp1	Xbp1	X-box-binding protein 1	0.000304542	0.156413	1.70932
GO:0030154	cell differentiation	Dzip1	Dzip1	Putative uncharacterized protein	0.000304542	0.156413	1.70932
GO:0030154	cell differentiation	C1galt1	C1galt1	Glycoprotein-N-acetylgalactosamine 3-beta-galactosyltransferase 1	0.000304542	0.156413	1.70932
GO:0030154	cell differentiation	Etv5	Etv5	ETS translocation variant 5	0.000304542	0.156413	1.70932
GO:0030154	cell differentiation	Frzb	Frzb	Secreted frizzled-related protein 3	0.000304542	0.156413	1.70932
GO:0030154	cell differentiation	Gli2	Gli2	GLI-Kruppel family member	0.000304542	0.156413	1.70932
GO:0030154	cell differentiation	Zic5	Zic5	Zinc finger protein ZIC 5	0.000304542	0.156413	1.70932
GO:0030154	cell differentiation	Pappa2	Pappa2	Protein Pappa2	0.000304542	0.156413	1.70932
GO:0030154	cell differentiation	Cand1	Cand1	Cullin-associated NEDD8-dissociated protein 1	0.000304542	0.156413	1.70932
GO:0030154	cell differentiation	Srrm4	Srrm4	Serine/arginine repetitive matrix protein 4	0.000304542	0.156413	1.70932
GO:0030154	cell differentiation	Sema4b	Sema4b	Semaphorin-4B	0.000304542	0.156413	1.70932
GO:0030154	cell differentiation	Theg	Theg	Testicular haploid expressed gene protein	0.000304542	0.156413	1.70932
GO:0030154	cell differentiation	Sfmbt1	Sfmbt1	Scm-like with four MBT domains protein 1	0.000304542	0.156413	1.70932
GO:0030154	cell differentiation	Thsd7a	Thsd7a	Thrombospondin type-1 domain-containing protein 7A	0.000304542	0.156413	1.70932
GO:0030154	cell differentiation	Rxfp1	Rxfp1	Relaxin receptor 1	0.000304542	0.156413	1.70932
GO:0030154	cell differentiation	Mdga1	Mdga1	MAM domain-containing glycosylphosphatidylinositol anchor protein 1	0.000304542	0.156413	1.70932
GO:0030154	cell differentiation	Mitf	Mitf	Microphthalmia-associated transcription factor B isoform	0.000304542	0.156413	1.70932
GO:0030154	cell differentiation	Eda2r	Eda2r	Eda2r protein	0.000304542	0.156413	1.70932
GO:0030154	cell differentiation	Prkd1	Prkd1	Serine/threonine-protein kinase D1	0.000304542	0.156413	1.70932
GO:0030154	cell differentiation	Ildr2	Ildr2	Immunoglobulin-like domain-containing receptor 2	0.000304542	0.156413	1.70932
GO:0030154	cell differentiation	Fgf9	Fgf9	Fibroblast growth factor 9	0.000304542	0.156413	1.70932
GO:0030154	cell differentiation	Suv39h2	Suv39h2	Histone-lysine N-methyltransferase SUV39H2	0.000304542	0.156413	1.70932
GO:0030154	cell differentiation	Dab1	Dab1	Disabled homolog 1 (Drosophila), isoform CRA_a	0.000304542	0.156413	1.70932
GO:0030154	cell differentiation	Strbp	Strbp	Spermatid perinuclear RNA-binding protein	0.000304542	0.156413	1.70932
GO:0030154	cell differentiation	Robo1	Robo1	Roundabout homolog 1	0.000304542	0.156413	1.70932
GO:0030154	cell differentiation	Csk	Csk	Tyrosine-protein kinase CSK	0.000304542	0.156413	1.70932
GO:0030154	cell differentiation	Pard3	Pard3	Par-3 (Partitioning defective 3) homolog (C. elegans)	0.000304542	0.156413	1.70932
GO:0030154	cell differentiation	Chl1	Chl1	Neural cell adhesion molecule L1-like protein	0.000304542	0.156413	1.70932
GO:0030154	cell differentiation	Zfp35	Zfp35	Mszf20-1	0.000304542	0.156413	1.70932
GO:0098656	anion transmembrane transport	Slc4a1	Slc4a1	Band 3 anion transport protein	0.000690703	0.173947	6.70721
GO:0098656	anion transmembrane transport	Abca1	Abca1	ATP-binding cassette sub-family A member 1	0.000690703	0.173947	6.70721
GO:0098656	anion transmembrane transport	Slc26a4	Slc26a4	Solute carrier family 26, member 4	0.000690703	0.173947	6.70721
GO:0098656	anion transmembrane transport	Slc4a10	Slc4a10	Sodium-driven chloride bicarbonate exchanger	0.000690703	0.173947	6.70721
GO:0098656	anion transmembrane transport	Slc4a4	Slc4a4	Slc4a4 protein	0.000690703	0.173947	6.70721
GO:0035641	locomotory exploration behavior	Lsamp	Lsamp	Limbic system-associated membrane protein	0.000746308	0.173947	8.94295
GO:0035641	locomotory exploration behavior	Tnr	Tnr	Tenascin-R	0.000746308	0.173947	8.94295
GO:0035641	locomotory exploration behavior	Slc4a10	Slc4a10	Sodium-driven chloride bicarbonate exchanger	0.000746308	0.173947	8.94295
GO:0035641	locomotory exploration behavior	Prkce	Prkce	Protein kinase C epsilon type	0.000746308	0.173947	8.94295
GO:0019933	cAMP-mediated signaling	Gal	Gal	Galanin peptides	0.000878939	0.173947	6.38782
GO:0019933	cAMP-mediated signaling	Epha5	Epha5	Receptor protein-tyrosine kinase	0.000878939	0.173947	6.38782
GO:0019933	cAMP-mediated signaling	Dgkq	Dgkq	Diacylglycerol kinase theta	0.000878939	0.173947	6.38782
GO:0019933	cAMP-mediated signaling	Rapgef4	Rapgef4	Rapgef4 protein	0.000878939	0.173947	6.38782
GO:0019933	cAMP-mediated signaling	Ndufs4	Ndufs4	NADH dehydrogenase [ubiquinone] iron-sulfur protein 4, mitochondrial	0.000878939	0.173947	6.38782
GO:0051301	cell division	Kif2b	Kif2b	Kinesin-like protein KIF2B	0.000912405	0.173947	1.95941
GO:0051301	cell division	Rad21	Rad21	RAD21 homolog (S. pombe)	0.000912405	0.173947	1.95941
GO:0051301	cell division	Pik3c3	Pik3c3	Phosphatidylinositol 3-kinase catalytic subunit type 3	0.000912405	0.173947	1.95941
GO:0051301	cell division	Ccnd3	Ccnd3	G1/S-specific cyclin-D3	0.000912405	0.173947	1.95941
GO:0051301	cell division	Cdk14	Cdk14	Cyclin-dependent kinase 14	0.000912405	0.173947	1.95941
GO:0051301	cell division	Kif20b	Kif20b	Kinesin-like protein KIF20B	0.000912405	0.173947	1.95941
GO:0051301	cell division	Sycp3	Sycp3	Synaptonemal complex protein 3	0.000912405	0.173947	1.95941
GO:0051301	cell division	Cdc42	Cdc42	Cell division control protein 42 homolog	0.000912405	0.173947	1.95941
GO:0051301	cell division	Cdc14a	Cdc14a	Dual specificity protein phosphatase CDC14A	0.000912405	0.173947	1.95941
GO:0051301	cell division	Sgol1	Sgol1	Shugoshin-like 1	0.000912405	0.173947	1.95941
GO:0051301	cell division	Pard6b	Pard6b	Partitioning defective 6 homolog beta	0.000912405	0.173947	1.95941
GO:0051301	cell division	Lmln	Lmln	Leishmanolysin-like peptidase	0.000912405	0.173947	1.95941
GO:0051301	cell division	Ahctf1	Ahctf1	Protein ELYS	0.000912405	0.173947	1.95941
GO:0051301	cell division	Kif14	Kif14	Kinesin-like protein	0.000912405	0.173947	1.95941
GO:0051301	cell division	Kif13a	Kif13a	Kinesin-like protein	0.000912405	0.173947	1.95941
GO:0051301	cell division	Cdc23	Cdc23	Cell division cycle protein 23 homolog	0.000912405	0.173947	1.95941
GO:0051301	cell division	Kif18b	Kif18b	Kinesin-like protein KIF18B	0.000912405	0.173947	1.95941
GO:0051301	cell division	Ncapd3	Ncapd3	Jacobsen syndrome region 2 protein	0.000912405	0.173947	1.95941
GO:0051301	cell division	D2Wsu81e	D2Wsu81e	Putative methyltransferase C9orf114 homolog	0.000912405	0.173947	1.95941
GO:0051301	cell division	Pard3b	Pard3b	Pard3b protein	0.000912405	0.173947	1.95941
GO:0051301	cell division	Prkce	Prkce	Protein kinase C epsilon type	0.000912405	0.173947	1.95941
GO:0051301	cell division	Setdb2	Setdb2	Histone-lysine N-methyltransferase SETDB2	0.000912405	0.173947	1.95941
GO:0051301	cell division	Anapc1	Anapc1	Anaphase-promoting complex subunit 1	0.000912405	0.173947	1.95941
GO:0051301	cell division	Sycp2	Sycp2	Synaptonemal complex protein 2	0.000912405	0.173947	1.95941
GO:0051301	cell division	Nup37	Nup37	Nucleoporin Nup37	0.000912405	0.173947	1.95941
GO:0051301	cell division	Pard3	Pard3	Par-3 (Partitioning defective 3) homolog (C. elegans)	0.000912405	0.173947	1.95941
GO:0007156	homophilic cell adhesion via plasma membrane adhesion molecules	Tenm3	Tenm3	Odz3 protein	0.000933179	0.173947	2.6266
GO:0007156	homophilic cell adhesion via plasma membrane adhesion molecules	Pcdhgb4	Pcdhgb4	Putative uncharacterized protein	0.000933179	0.173947	2.6266
GO:0007156	homophilic cell adhesion via plasma membrane adhesion molecules	Pcdh9	Pcdh9	Protein Pcdh9	0.000933179	0.173947	2.6266
GO:0007156	homophilic cell adhesion via plasma membrane adhesion molecules	Pcdha1	Pcdha1	Pcdha1 protein	0.000933179	0.173947	2.6266
GO:0007156	homophilic cell adhesion via plasma membrane adhesion molecules	Cdh12	Cdh12	Cadherin-12	0.000933179	0.173947	2.6266
GO:0007156	homophilic cell adhesion via plasma membrane adhesion molecules	Fat4	Fat4	Protocadherin Fat 4	0.000933179	0.173947	2.6266
GO:0007156	homophilic cell adhesion via plasma membrane adhesion molecules	Cdh11	Cdh11	Cadherin-11	0.000933179	0.173947	2.6266
GO:0007156	homophilic cell adhesion via plasma membrane adhesion molecules	Pcdhga4	Pcdhga4	Protocadherin gamma-A4	0.000933179	0.173947	2.6266
GO:0007156	homophilic cell adhesion via plasma membrane adhesion molecules	Cdh5	Cdh5	Cadherin-5	0.000933179	0.173947	2.6266
GO:0007156	homophilic cell adhesion via plasma membrane adhesion molecules	Cdh20	Cdh20	Cadherin-20	0.000933179	0.173947	2.6266
GO:0007156	homophilic cell adhesion via plasma membrane adhesion molecules	Robo1	Robo1	Roundabout homolog 1	0.000933179	0.173947	2.6266
GO:0007156	homophilic cell adhesion via plasma membrane adhesion molecules	Pcdh15	Pcdh15	Protocadherin-15	0.000933179	0.173947	2.6266
GO:0007156	homophilic cell adhesion via plasma membrane adhesion molecules	Pcdhga12	Pcdhga12	Pcdhga12 protein	0.000933179	0.173947	2.6266
GO:0007156	homophilic cell adhesion via plasma membrane adhesion molecules	Chl1	Chl1	Neural cell adhesion molecule L1-like protein	0.000933179	0.173947	2.6266
GO:0006642	triglyceride mobilization	Il6st	Il6st	Interleukin-6 signal transductor	0.00094831	0.173947	13.4144
GO:0006642	triglyceride mobilization	Sirt1	Sirt1	Sirt1 protein	0.00094831	0.173947	13.4144
GO:0006642	triglyceride mobilization	Lpin1	Lpin1	Phosphatidate phosphatase LPIN1	0.00094831	0.173947	13.4144
GO:0015698	inorganic anion transport	Slc4a1	Slc4a1	Band 3 anion transport protein	0.00094831	0.173947	13.4144
GO:0015698	inorganic anion transport	Slc26a4	Slc26a4	Solute carrier family 26, member 4	0.00094831	0.173947	13.4144
GO:0015698	inorganic anion transport	Slc4a4	Slc4a4	Slc4a4 protein	0.00094831	0.173947	13.4144
GO:0065004	protein-DNA complex assembly	Sox12	Sox12	Transcription factor SOX-12	0.00094831	0.173947	13.4144
GO:0065004	protein-DNA complex assembly	Hey2	Hey2	Hairy/enhancer-of-split related with YRPW motif 2	0.00094831	0.173947	13.4144
GO:0065004	protein-DNA complex assembly	Tcf4	Tcf4	Transcription factor 4	0.00094831	0.173947	13.4144
GO:0038027	apolipoprotein A-I-mediated signaling pathway	Itgav	Itgav	Integrin alpha-V	0.00094831	0.173947	13.4144
GO:0038027	apolipoprotein A-I-mediated signaling pathway	Abca1	Abca1	ATP-binding cassette sub-family A member 1	0.00094831	0.173947	13.4144
GO:0038027	apolipoprotein A-I-mediated signaling pathway	4930544G11Rik	4930544G11Rik	Testis specific expressed protein 5	0.00094831	0.173947	13.4144
GO:0032743	positive regulation of interleukin-2 production	Pde4d	Pde4d	Phosphodiesterase 4D, cAMP specific	0.00104633	0.178176	8.25503
GO:0032743	positive regulation of interleukin-2 production	Pde4b	Pde4b	Protein Pde4b	0.00104633	0.178176	8.25503
GO:0032743	positive regulation of interleukin-2 production	Map3k7	Map3k7	Mitogen-activated protein kinase kinase kinase 7	0.00104633	0.178176	8.25503
GO:0032743	positive regulation of interleukin-2 production	Tnfsf4	Tnfsf4	Tumor necrosis factor (Ligand) superfamily member 4	0.00104633	0.178176	8.25503
GO:0016445	somatic diversification of immunoglobulins	Ctnnbl1	Ctnnbl1	Putative uncharacterized protein	0.00138766	0.178176	26.8289
GO:0016445	somatic diversification of immunoglobulins	Aicda	Aicda	Single-stranded DNA cytosine deaminase	0.00138766	0.178176	26.8289
GO:0042891	antibiotic transport	Slc15a2	Slc15a2	Solute carrier family 15 member 2	0.00138766	0.178176	26.8289
GO:0042891	antibiotic transport	Slc22a5	Slc22a5	Solute carrier family 22 member 5	0.00138766	0.178176	26.8289
GO:2000820	negative regulation of transcription from RNA polymerase II promoter involved in smooth muscle cell differentiation	Hey2	Hey2	Hairy/enhancer-of-split related with YRPW motif 2	0.00138766	0.178176	26.8289
GO:2000820	negative regulation of transcription from RNA polymerase II promoter involved in smooth muscle cell differentiation	Hey1	Hey1	Putative uncharacterized protein	0.00138766	0.178176	26.8289
GO:1901898	negative regulation of relaxation of cardiac muscle	Pde4d	Pde4d	Phosphodiesterase 4D, cAMP specific	0.00138766	0.178176	26.8289
GO:1901898	negative regulation of relaxation of cardiac muscle	Pde4b	Pde4b	Protein Pde4b	0.00138766	0.178176	26.8289
GO:0036304	umbilical cord morphogenesis	Hey2	Hey2	Hairy/enhancer-of-split related with YRPW motif 2	0.00138766	0.178176	26.8289
GO:0036304	umbilical cord morphogenesis	Hey1	Hey1	Putative uncharacterized protein	0.00138766	0.178176	26.8289
GO:0045944	positive regulation of transcription from RNA polymerase II promoter	Ppp3ca	Ppp3ca	Serine/threonine-protein phosphatase 2B catalytic subunit alpha isoform	0.00155383	0.190012	1.51861
GO:0045944	positive regulation of transcription from RNA polymerase II promoter	Rad21	Rad21	RAD21 homolog (S. pombe)	0.00155383	0.190012	1.51861
GO:0045944	positive regulation of transcription from RNA polymerase II promoter	Tcf7l2	Tcf7l2	Transcription factor 7-like 2	0.00155383	0.190012	1.51861
GO:0045944	positive regulation of transcription from RNA polymerase II promoter	Sox12	Sox12	Transcription factor SOX-12	0.00155383	0.190012	1.51861
GO:0045944	positive regulation of transcription from RNA polymerase II promoter	Mecom	Mecom	Evi1 protein	0.00155383	0.190012	1.51861
GO:0045944	positive regulation of transcription from RNA polymerase II promoter	Meis3	Meis3	Homeobox protein Meis3	0.00155383	0.190012	1.51861
GO:0045944	positive regulation of transcription from RNA polymerase II promoter	Tbr1	Tbr1	T-box brain protein 1	0.00155383	0.190012	1.51861
GO:0045944	positive regulation of transcription from RNA polymerase II promoter	Prkdc	Prkdc	DNA-dependent protein kinase catalytic subunit	0.00155383	0.190012	1.51861
GO:0045944	positive regulation of transcription from RNA polymerase II promoter	Atxn1	Atxn1	Ataxin-1	0.00155383	0.190012	1.51861
GO:0045944	positive regulation of transcription from RNA polymerase II promoter	Kdm6b	Kdm6b	Putative uncharacterized protein	0.00155383	0.190012	1.51861
GO:0045944	positive regulation of transcription from RNA polymerase II promoter	Tgfb3	Tgfb3	Transforming growth factor beta-3	0.00155383	0.190012	1.51861
GO:0045944	positive regulation of transcription from RNA polymerase II promoter	Rnf10	Rnf10	RING finger protein 10	0.00155383	0.190012	1.51861
GO:0045944	positive regulation of transcription from RNA polymerase II promoter	Il33	Il33	Interleukin-33	0.00155383	0.190012	1.51861
GO:0045944	positive regulation of transcription from RNA polymerase II promoter	Nipbl	Nipbl	Nipbl protein	0.00155383	0.190012	1.51861
GO:0045944	positive regulation of transcription from RNA polymerase II promoter	Fos	Fos	Proto-oncogene c-Fos	0.00155383	0.190012	1.51861
GO:0045944	positive regulation of transcription from RNA polymerase II promoter	Lmo4	Lmo4	LIM domain transcription factor LMO4	0.00155383	0.190012	1.51861
GO:0045944	positive regulation of transcription from RNA polymerase II promoter	Esr2	Esr2	Estrogen receptor beta	0.00155383	0.190012	1.51861
GO:0045944	positive regulation of transcription from RNA polymerase II promoter	Mycn	Mycn	N-myc proto-oncogene protein	0.00155383	0.190012	1.51861
GO:0045944	positive regulation of transcription from RNA polymerase II promoter	Sirt1	Sirt1	Sirt1 protein	0.00155383	0.190012	1.51861
GO:0045944	positive regulation of transcription from RNA polymerase II promoter	Hnrnpk	Hnrnpk	Heterogeneous nuclear ribonucleoprotein K	0.00155383	0.190012	1.51861
GO:0045944	positive regulation of transcription from RNA polymerase II promoter	Hey2	Hey2	Hairy/enhancer-of-split related with YRPW motif 2	0.00155383	0.190012	1.51861
GO:0045944	positive regulation of transcription from RNA polymerase II promoter	Tcf4	Tcf4	Transcription factor 4	0.00155383	0.190012	1.51861
GO:0045944	positive regulation of transcription from RNA polymerase II promoter	Xbp1	Xbp1	X-box-binding protein 1	0.00155383	0.190012	1.51861
GO:0045944	positive regulation of transcription from RNA polymerase II promoter	Gal	Gal	Galanin peptides	0.00155383	0.190012	1.51861
GO:0045944	positive regulation of transcription from RNA polymerase II promoter	Etv5	Etv5	ETS translocation variant 5	0.00155383	0.190012	1.51861
GO:0045944	positive regulation of transcription from RNA polymerase II promoter	Rest	Rest	REST4	0.00155383	0.190012	1.51861
GO:0045944	positive regulation of transcription from RNA polymerase II promoter	Sox6	Sox6	Transcription factor SOX-6	0.00155383	0.190012	1.51861
GO:0045944	positive regulation of transcription from RNA polymerase II promoter	Gli2	Gli2	GLI-Kruppel family member	0.00155383	0.190012	1.51861
GO:0045944	positive regulation of transcription from RNA polymerase II promoter	Akt2	Akt2	RAC-beta serine/threonine-protein kinase	0.00155383	0.190012	1.51861
GO:0045944	positive regulation of transcription from RNA polymerase II promoter	Barhl2	Barhl2	Barhl2 protein	0.00155383	0.190012	1.51861
GO:0045944	positive regulation of transcription from RNA polymerase II promoter	Bhlhe23	Bhlhe23	Basic helix-loop-helix domain containing, class B4	0.00155383	0.190012	1.51861
GO:0045944	positive regulation of transcription from RNA polymerase II promoter	Bach1	Bach1	Transcription regulator protein BACH1	0.00155383	0.190012	1.51861
GO:0045944	positive regulation of transcription from RNA polymerase II promoter	Wnt2	Wnt2	Protein Wnt-2	0.00155383	0.190012	1.51861
GO:0045944	positive regulation of transcription from RNA polymerase II promoter	Ldb2	Ldb2	LIM domain-binding protein 2	0.00155383	0.190012	1.51861
GO:0045944	positive regulation of transcription from RNA polymerase II promoter	Lpin1	Lpin1	Phosphatidate phosphatase LPIN1	0.00155383	0.190012	1.51861
GO:0045944	positive regulation of transcription from RNA polymerase II promoter	Wt1	Wt1	Wilms tumor protein homolog	0.00155383	0.190012	1.51861
GO:0045944	positive regulation of transcription from RNA polymerase II promoter	Mitf	Mitf	Microphthalmia-associated transcription factor B isoform	0.00155383	0.190012	1.51861
GO:0045944	positive regulation of transcription from RNA polymerase II promoter	Zfp746	Zfp746	Zinc finger protein 746	0.00155383	0.190012	1.51861
GO:0045944	positive regulation of transcription from RNA polymerase II promoter	Six1	Six1	Putative uncharacterized protein	0.00155383	0.190012	1.51861
GO:0045944	positive regulation of transcription from RNA polymerase II promoter	Prkd1	Prkd1	Serine/threonine-protein kinase D1	0.00155383	0.190012	1.51861
GO:0045944	positive regulation of transcription from RNA polymerase II promoter	Cebpz	Cebpz	CCAAT/enhancer-binding protein zeta	0.00155383	0.190012	1.51861
GO:0045944	positive regulation of transcription from RNA polymerase II promoter	Hey1	Hey1	Putative uncharacterized protein	0.00155383	0.190012	1.51861
GO:0045944	positive regulation of transcription from RNA polymerase II promoter	Lhx2	Lhx2	LIM/homeobox protein Lhx2	0.00155383	0.190012	1.51861
GO:0045944	positive regulation of transcription from RNA polymerase II promoter	Smad1	Smad1	Mothers against decapentaplegic homolog 1	0.00155383	0.190012	1.51861
GO:0045944	positive regulation of transcription from RNA polymerase II promoter	Meis1	Meis1	Homeobox protein Meis1	0.00155383	0.190012	1.51861
GO:0045944	positive regulation of transcription from RNA polymerase II promoter	Shox2	Shox2	Short stature homeobox protein 2	0.00155383	0.190012	1.51861
GO:0045944	positive regulation of transcription from RNA polymerase II promoter	Gcm1	Gcm1	Chorion-specific transcription factor GCMa	0.00155383	0.190012	1.51861
GO:0045944	positive regulation of transcription from RNA polymerase II promoter	Glis1	Glis1	Zinc finger protein GLIS1	0.00155383	0.190012	1.51861
GO:0045944	positive regulation of transcription from RNA polymerase II promoter	Mkx	Mkx	Mohawk homeobox	0.00155383	0.190012	1.51861
GO:0045944	positive regulation of transcription from RNA polymerase II promoter	Kdm1a	Kdm1a	Lysine-specific histone demethylase 1A	0.00155383	0.190012	1.51861
GO:0045944	positive regulation of transcription from RNA polymerase II promoter	Six3	Six3	Homeobox protein SIX3	0.00155383	0.190012	1.51861
GO:0045944	positive regulation of transcription from RNA polymerase II promoter	Igf2	Igf2	Insulin-like growth factor 2	0.00155383	0.190012	1.51861
GO:0045944	positive regulation of transcription from RNA polymerase II promoter	Ablim1	Ablim1	Ablim1 protein	0.00155383	0.190012	1.51861
GO:0045944	positive regulation of transcription from RNA polymerase II promoter	Pknox1	Pknox1	Homeobox protein PKNOX1	0.00155383	0.190012	1.51861
GO:0007019	microtubule depolymerization	Kif2b	Kif2b	Kinesin-like protein KIF2B	0.00188213	0.219695	7.15436
GO:0007019	microtubule depolymerization	Kif14	Kif14	Kinesin-like protein	0.00188213	0.219695	7.15436
GO:0007019	microtubule depolymerization	Kif18b	Kif18b	Kinesin-like protein KIF18B	0.00188213	0.219695	7.15436
GO:0007019	microtubule depolymerization	Sgk1	Sgk1	Serine/threonine-protein kinase Sgk1	0.00188213	0.219695	7.15436
GO:0007018	microtubule-based movement	Kif2b	Kif2b	Kinesin-like protein KIF2B	0.00222267	0.240609	3.13584
GO:0007018	microtubule-based movement	Kif20b	Kif20b	Kinesin-like protein KIF20B	0.00222267	0.240609	3.13584
GO:0007018	microtubule-based movement	Kif14	Kif14	Kinesin-like protein	0.00222267	0.240609	3.13584
GO:0007018	microtubule-based movement	Kif13a	Kif13a	Kinesin-like protein	0.00222267	0.240609	3.13584
GO:0007018	microtubule-based movement	Kif18b	Kif18b	Kinesin-like protein KIF18B	0.00222267	0.240609	3.13584
GO:0007018	microtubule-based movement	E230025N22Rik	E230025N22Rik	Putative uncharacterized protein E230025N22	0.00222267	0.240609	3.13584
GO:0007018	microtubule-based movement	Dync1i2	Dync1i2	Cytoplasmic dynein 1 intermediate chain 2	0.00222267	0.240609	3.13584
GO:0007018	microtubule-based movement	Klc1	Klc1	Kinesin light chain 1T	0.00222267	0.240609	3.13584
GO:0007018	microtubule-based movement	Dnah7c	Dnah7c	Protein Dnah7c	0.00222267	0.240609	3.13584
GO:0021799	cerebral cortex radially oriented cell migration	Rnf7	Rnf7	RING-box protein 2	0.00243607	0.240609	6.70721
GO:0021799	cerebral cortex radially oriented cell migration	Disc1	Disc1	Disrupted in schizophrenia 1 homolog	0.00243607	0.240609	6.70721
GO:0021799	cerebral cortex radially oriented cell migration	Mdga1	Mdga1	MAM domain-containing glycosylphosphatidylinositol anchor protein 1	0.00243607	0.240609	6.70721
GO:0021799	cerebral cortex radially oriented cell migration	Dab1	Dab1	Disabled homolog 1 (Drosophila), isoform CRA_a	0.00243607	0.240609	6.70721
GO:0006198	cAMP catabolic process	Pde1a	Pde1a	Calcium/calmodulin-dependent 3',5'-cyclic nucleotide phosphodiesterase 1A	0.00243607	0.240609	6.70721
GO:0006198	cAMP catabolic process	Pde4d	Pde4d	Phosphodiesterase 4D, cAMP specific	0.00243607	0.240609	6.70721
GO:0006198	cAMP catabolic process	Pde4b	Pde4b	Protein Pde4b	0.00243607	0.240609	6.70721
GO:0006198	cAMP catabolic process	Pde11a	Pde11a	Dual 3',5'-cyclic-AMP and -GMP phosphodiesterase 11A	0.00243607	0.240609	6.70721
GO:0001678	cellular glucose homeostasis	Tcf7l2	Tcf7l2	Transcription factor 7-like 2	0.00243607	0.240609	6.70721
GO:0001678	cellular glucose homeostasis	Hk1	Hk1	Hexokinase 1	0.00243607	0.240609	6.70721
GO:0001678	cellular glucose homeostasis	Sirt1	Sirt1	Sirt1 protein	0.00243607	0.240609	6.70721
GO:0001678	cellular glucose homeostasis	Cartpt	Cartpt	Cocaine- and amphetamine-regulated transcript protein	0.00243607	0.240609	6.70721
GO:0007411	axon guidance	Tbr1	Tbr1	T-box brain protein 1	0.0026556	0.247846	2.55513
GO:0007411	axon guidance	Sema3a	Sema3a	Semaphorin-3A	0.0026556	0.247846	2.55513
GO:0007411	axon guidance	Gli2	Gli2	GLI-Kruppel family member	0.0026556	0.247846	2.55513
GO:0007411	axon guidance	Lmtk2	Lmtk2	Serine/threonine-protein kinase LMTK2	0.0026556	0.247846	2.55513
GO:0007411	axon guidance	Ptpro	Ptpro	Protein-tyrosine-phosphatase	0.0026556	0.247846	2.55513
GO:0007411	axon guidance	Epha5	Epha5	Receptor protein-tyrosine kinase	0.0026556	0.247846	2.55513
GO:0007411	axon guidance	Pla2g10	Pla2g10	Phospholipase A(2)	0.0026556	0.247846	2.55513
GO:0007411	axon guidance	Lhx2	Lhx2	LIM/homeobox protein Lhx2	0.0026556	0.247846	2.55513
GO:0007411	axon guidance	Robo1	Robo1	Roundabout homolog 1	0.0026556	0.247846	2.55513
GO:0007411	axon guidance	Ank3	Ank3	Ankyrin-3	0.0026556	0.247846	2.55513
GO:0007411	axon guidance	Ablim1	Ablim1	Ablim1 protein	0.0026556	0.247846	2.55513
GO:0007411	axon guidance	Chl1	Chl1	Neural cell adhesion molecule L1-like protein	0.0026556	0.247846	2.55513
GO:0007420	brain development	Prkdc	Prkdc	DNA-dependent protein kinase catalytic subunit	0.00270237	0.247846	2.14127
GO:0007420	brain development	Arl6	Arl6	ADP-ribosylation factor-like protein 6	0.00270237	0.247846	2.14127
GO:0007420	brain development	Nipbl	Nipbl	Nipbl protein	0.00270237	0.247846	2.14127
GO:0007420	brain development	Cadm2	Cadm2	Cell adhesion molecule 2	0.00270237	0.247846	2.14127
GO:0007420	brain development	Esr2	Esr2	Estrogen receptor beta	0.00270237	0.247846	2.14127
GO:0007420	brain development	Eml1	Eml1	Echinoderm microtubule associated protein-like protein 1	0.00270237	0.247846	2.14127
GO:0007420	brain development	Hnmt	Hnmt	Histamine N-methyltransferase	0.00270237	0.247846	2.14127
GO:0007420	brain development	Hesx1	Hesx1	Homeobox expressed in ES cells 1	0.00270237	0.247846	2.14127
GO:0007420	brain development	Frzb	Frzb	Secreted frizzled-related protein 3	0.00270237	0.247846	2.14127
GO:0007420	brain development	Mdga1	Mdga1	MAM domain-containing glycosylphosphatidylinositol anchor protein 1	0.00270237	0.247846	2.14127
GO:0007420	brain development	Igf1r	Igf1r	Tyrosine-protein kinase receptor	0.00270237	0.247846	2.14127
GO:0007420	brain development	Lhx2	Lhx2	LIM/homeobox protein Lhx2	0.00270237	0.247846	2.14127
GO:0007420	brain development	Dab1	Dab1	Disabled homolog 1 (Drosophila), isoform CRA_a	0.00270237	0.247846	2.14127
GO:0007420	brain development	Macrod2	Macrod2	O-acetyl-ADP-ribose deacetylase MACROD2	0.00270237	0.247846	2.14127
GO:0007420	brain development	Csk	Csk	Tyrosine-protein kinase CSK	0.00270237	0.247846	2.14127
GO:0007420	brain development	Six3	Six3	Homeobox protein SIX3	0.00270237	0.247846	2.14127
GO:0007420	brain development	Ndufs4	Ndufs4	NADH dehydrogenase [ubiquinone] iron-sulfur protein 4, mitochondrial	0.00270237	0.247846	2.14127
GO:0006885	regulation of pH	Slc26a4	Slc26a4	Solute carrier family 26, member 4	0.00289829	0.256649	4.96831
GO:0006885	regulation of pH	Slc4a10	Slc4a10	Sodium-driven chloride bicarbonate exchanger	0.00289829	0.256649	4.96831
GO:0006885	regulation of pH	Agtr1a	Agtr1a	Type-1A angiotensin II receptor	0.00289829	0.256649	4.96831
GO:0006885	regulation of pH	Slc4a4	Slc4a4	Slc4a4 protein	0.00289829	0.256649	4.96831
GO:0006885	regulation of pH	Atp12a	Atp12a	Potassium-transporting ATPase alpha chain 2	0.00289829	0.256649	4.96831
GO:0010976	positive regulation of neuron projection development	Tenm3	Tenm3	Odz3 protein	0.00307045	0.262831	2.79467
GO:0010976	positive regulation of neuron projection development	Sirt1	Sirt1	Sirt1 protein	0.00307045	0.262831	2.79467
GO:0010976	positive regulation of neuron projection development	Epha3	Epha3	Receptor protein-tyrosine kinase	0.00307045	0.262831	2.79467
GO:0010976	positive regulation of neuron projection development	Twf2	Twf2	Twinfilin-2	0.00307045	0.262831	2.79467
GO:0010976	positive regulation of neuron projection development	Disc1	Disc1	Disrupted in schizophrenia 1 homolog	0.00307045	0.262831	2.79467
GO:0010976	positive regulation of neuron projection development	Negr1	Negr1	Neuronal growth regulator 1	0.00307045	0.262831	2.79467
GO:0010976	positive regulation of neuron projection development	Prkd1	Prkd1	Serine/threonine-protein kinase D1	0.00307045	0.262831	2.79467
GO:0010976	positive regulation of neuron projection development	Fez1	Fez1	Fasciculation and elongation protein zeta-1	0.00307045	0.262831	2.79467
GO:0010976	positive regulation of neuron projection development	Kdm1a	Kdm1a	Lysine-specific histone demethylase 1A	0.00307045	0.262831	2.79467
GO:0010976	positive regulation of neuron projection development	Magi2	Magi2	Putative uncharacterized protein	0.00307045	0.262831	2.79467
GO:0048015	phosphatidylinositol-mediated signaling	Pik3c3	Pik3c3	Phosphatidylinositol 3-kinase catalytic subunit type 3	0.00342165	0.276641	4.79087
GO:0048015	phosphatidylinositol-mediated signaling	Pik3c2g	Pik3c2g	Phosphatidylinositol 4-phosphate 3-kinase C2 domain-containing subunit gamma	0.00342165	0.276641	4.79087
GO:0048015	phosphatidylinositol-mediated signaling	Pi4ka	Pi4ka	Protein Pi4ka	0.00342165	0.276641	4.79087
GO:0048015	phosphatidylinositol-mediated signaling	Igf1r	Igf1r	Tyrosine-protein kinase receptor	0.00342165	0.276641	4.79087
GO:0048015	phosphatidylinositol-mediated signaling	Pik3cg	Pik3cg	Phosphoinositide-3-kinase gamma polypeptide	0.00342165	0.276641	4.79087
GO:0031017	exocrine pancreas development	Xbp1	Xbp1	X-box-binding protein 1	0.00366162	0.276641	8.94295
GO:0031017	exocrine pancreas development	Igf1r	Igf1r	Tyrosine-protein kinase receptor	0.00366162	0.276641	8.94295
GO:0031017	exocrine pancreas development	Igf2	Igf2	Insulin-like growth factor 2	0.00366162	0.276641	8.94295
GO:0002063	chondrocyte development	Chst11	Chst11	Uncharacterized protein	0.0038601	0.276641	5.96197
GO:0002063	chondrocyte development	Sulf1	Sulf1	Extracellular sulfatase Sulf-1	0.0038601	0.276641	5.96197
GO:0002063	chondrocyte development	Mia3	Mia3	Melanoma inhibitory activity protein 3	0.0038601	0.276641	5.96197
GO:0002063	chondrocyte development	Shox2	Shox2	Short stature homeobox protein 2	0.0038601	0.276641	5.96197
GO:0003199	endocardial cushion to mesenchymal transition involved in heart valve formation	Hey2	Hey2	Hairy/enhancer-of-split related with YRPW motif 2	0.00405979	0.276641	17.8859
GO:0003199	endocardial cushion to mesenchymal transition involved in heart valve formation	Hey1	Hey1	Putative uncharacterized protein	0.00405979	0.276641	17.8859
GO:2001212	regulation of vasculogenesis	Hey2	Hey2	Hairy/enhancer-of-split related with YRPW motif 2	0.00405979	0.276641	17.8859
GO:2001212	regulation of vasculogenesis	Hey1	Hey1	Putative uncharacterized protein	0.00405979	0.276641	17.8859
GO:0060379	cardiac muscle cell myoblast differentiation	Nrg1	Nrg1	Type III neuregulin 1	0.00405979	0.276641	17.8859
GO:0060379	cardiac muscle cell myoblast differentiation	Rest	Rest	REST4	0.00405979	0.276641	17.8859
GO:0015858	nucleoside transport	Slc29a3	Slc29a3	Equilibrative nucleoside transporter 3	0.00405979	0.276641	17.8859
GO:0015858	nucleoside transport	Slc29a2	Slc29a2	Equilibrative nucleoside transporter 2	0.00405979	0.276641	17.8859
GO:0051897	positive regulation of protein kinase B signaling	Nrg1	Nrg1	Type III neuregulin 1	0.00471571	0.276641	2.80767
GO:0051897	positive regulation of protein kinase B signaling	Tcf7l2	Tcf7l2	Transcription factor 7-like 2	0.00471571	0.276641	2.80767
GO:0051897	positive regulation of protein kinase B signaling	Meis3	Meis3	Homeobox protein Meis3	0.00471571	0.276641	2.80767
GO:0051897	positive regulation of protein kinase B signaling	Vegfb	Vegfb	Vascular endothelial growth factor B	0.00471571	0.276641	2.80767
GO:0051897	positive regulation of protein kinase B signaling	Gcnt2	Gcnt2	Beta-1,6-N-acetylglucosaminyltransferase B	0.00471571	0.276641	2.80767
GO:0051897	positive regulation of protein kinase B signaling	Spry2	Spry2	Sprouty homolog 2 (Drosophila)	0.00471571	0.276641	2.80767
GO:0051897	positive regulation of protein kinase B signaling	Igf1r	Igf1r	Tyrosine-protein kinase receptor	0.00471571	0.276641	2.80767
GO:0051897	positive regulation of protein kinase B signaling	Pik3cg	Pik3cg	Phosphoinositide-3-kinase gamma polypeptide	0.00471571	0.276641	2.80767
GO:0051897	positive regulation of protein kinase B signaling	Igf2	Igf2	Insulin-like growth factor 2	0.00471571	0.276641	2.80767
GO:0048149	behavioral response to ethanol	Eps8	Eps8	Epidermal growth factor receptor kinase substrate 8	0.00508684	0.276641	8.04866
GO:0048149	behavioral response to ethanol	Crhbp	Crhbp	Putative uncharacterized protein	0.00508684	0.276641	8.04866
GO:0048149	behavioral response to ethanol	Oprm1	Oprm1	Mu opioid receptor mMOR-1R2	0.00508684	0.276641	8.04866
GO:0051024	positive regulation of immunoglobulin secretion	Il33	Il33	Interleukin-33	0.00508684	0.276641	8.04866
GO:0051024	positive regulation of immunoglobulin secretion	Xbp1	Xbp1	X-box-binding protein 1	0.00508684	0.276641	8.04866
GO:0051024	positive regulation of immunoglobulin secretion	Tnfsf4	Tnfsf4	Tumor necrosis factor (Ligand) superfamily member 4	0.00508684	0.276641	8.04866
GO:0032467	positive regulation of cytokinesis	Cdc42	Cdc42	Cell division control protein 42 homolog	0.00539592	0.276641	4.32723
GO:0032467	positive regulation of cytokinesis	4930544G11Rik	4930544G11Rik	Testis specific expressed protein 5	0.00539592	0.276641	4.32723
GO:0032467	positive regulation of cytokinesis	Kif14	Kif14	Kinesin-like protein	0.00539592	0.276641	4.32723
GO:0032467	positive regulation of cytokinesis	Igf1r	Igf1r	Tyrosine-protein kinase receptor	0.00539592	0.276641	4.32723
GO:0032467	positive regulation of cytokinesis	Prkce	Prkce	Protein kinase C epsilon type	0.00539592	0.276641	4.32723
GO:0048557	embryonic digestive tract morphogenesis	Tcf7l2	Tcf7l2	Transcription factor 7-like 2	0.00690978	0.276641	5.11026
GO:0048557	embryonic digestive tract morphogenesis	Nipbl	Nipbl	Nipbl protein	0.00690978	0.276641	5.11026
GO:0048557	embryonic digestive tract morphogenesis	Id2	Id2	DNA-binding protein inhibitor ID-2	0.00690978	0.276641	5.11026
GO:0048557	embryonic digestive tract morphogenesis	Shox2	Shox2	Short stature homeobox protein 2	0.00690978	0.276641	5.11026
GO:0030902	hindbrain development	Tbr1	Tbr1	T-box brain protein 1	0.00690978	0.276641	5.11026
GO:0030902	hindbrain development	Kdm2b	Kdm2b	Lysine-specific demethylase 2B	0.00690978	0.276641	5.11026
GO:0030902	hindbrain development	Gli2	Gli2	GLI-Kruppel family member	0.00690978	0.276641	5.11026
GO:0030902	hindbrain development	Smad1	Smad1	Mothers against decapentaplegic homolog 1	0.00690978	0.276641	5.11026
GO:0060045	positive regulation of cardiac muscle cell proliferation	Nrg1	Nrg1	Type III neuregulin 1	0.00690978	0.276641	5.11026
GO:0060045	positive regulation of cardiac muscle cell proliferation	Hey2	Hey2	Hairy/enhancer-of-split related with YRPW motif 2	0.00690978	0.276641	5.11026
GO:0060045	positive regulation of cardiac muscle cell proliferation	Wnt2	Wnt2	Protein Wnt-2	0.00690978	0.276641	5.11026
GO:0060045	positive regulation of cardiac muscle cell proliferation	Fgf9	Fgf9	Fibroblast growth factor 9	0.00690978	0.276641	5.11026
GO:0032259	methylation	Thumpd2	Thumpd2	Thumpd2 protein	0.00731525	0.276641	2.09835
GO:0032259	methylation	Mettl7a1	Mettl7a1	UbiE1	0.00731525	0.276641	2.09835
GO:0032259	methylation	Hnmt	Hnmt	Histamine N-methyltransferase	0.00731525	0.276641	2.09835
GO:0032259	methylation	Camkmt	Camkmt	Uncharacterized protein	0.00731525	0.276641	2.09835
GO:0032259	methylation	Tyms	Tyms	Thymidylate synthase, isoform CRA_b	0.00731525	0.276641	2.09835
GO:0032259	methylation	D2Wsu81e	D2Wsu81e	Putative methyltransferase C9orf114 homolog	0.00731525	0.276641	2.09835
GO:0032259	methylation	Mettl14	Mettl14	N6-adenosine-methyltransferase subunit METTL14	0.00731525	0.276641	2.09835
GO:0032259	methylation	Setdb2	Setdb2	Histone-lysine N-methyltransferase SETDB2	0.00731525	0.276641	2.09835
GO:0032259	methylation	Fam103a1	Fam103a1	RNMT-activating mini protein	0.00731525	0.276641	2.09835
GO:0032259	methylation	Mettl8	Mettl8	Methyltransferase-like protein 8	0.00731525	0.276641	2.09835
GO:0032259	methylation	Suv39h2	Suv39h2	Histone-lysine N-methyltransferase SUV39H2	0.00731525	0.276641	2.09835
GO:0032259	methylation	Aldh1l2	Aldh1l2	Mitochondrial 10-formyltetrahydrofolate dehydrogenase	0.00731525	0.276641	2.09835
GO:0032259	methylation	Mettl25	Mettl25	Methyltransferase-like protein 25	0.00731525	0.276641	2.09835
GO:0032259	methylation	Mettl3	Mettl3	N6-adenosine-methyltransferase subunit METTL3	0.00731525	0.276641	2.09835
GO:0007155	cell adhesion	Tenm3	Tenm3	Odz3 protein	0.00773885	0.276641	1.57817
GO:0007155	cell adhesion	Cd4	Cd4	T4 surface glycoprotein	0.00773885	0.276641	1.57817
GO:0007155	cell adhesion	Ambn	Ambn	Ameloblastin, isoform CRA_b	0.00773885	0.276641	1.57817
GO:0007155	cell adhesion	Itgav	Itgav	Integrin alpha-V	0.00773885	0.276641	1.57817
GO:0007155	cell adhesion	Lsamp	Lsamp	Limbic system-associated membrane protein	0.00773885	0.276641	1.57817
GO:0007155	cell adhesion	Tnr	Tnr	Tenascin-R	0.00773885	0.276641	1.57817
GO:0007155	cell adhesion	Nlgn1	Nlgn1	Neuroligin-1	0.00773885	0.276641	1.57817
GO:0007155	cell adhesion	Hapln4	Hapln4	Hyaluronan and proteoglycan link protein 4	0.00773885	0.276641	1.57817
GO:0007155	cell adhesion	Cadm2	Cadm2	Cell adhesion molecule 2	0.00773885	0.276641	1.57817
GO:0007155	cell adhesion	Lama3	Lama3	Putative uncharacterized protein	0.00773885	0.276641	1.57817
GO:0007155	cell adhesion	Sulf1	Sulf1	Extracellular sulfatase Sulf-1	0.00773885	0.276641	1.57817
GO:0007155	cell adhesion	Prkca	Prkca	Protein kinase C alpha type	0.00773885	0.276641	1.57817
GO:0007155	cell adhesion	Lmln	Lmln	Leishmanolysin-like peptidase	0.00773885	0.276641	1.57817
GO:0007155	cell adhesion	Pcdhgb4	Pcdhgb4	Putative uncharacterized protein	0.00773885	0.276641	1.57817
GO:0007155	cell adhesion	Negr1	Negr1	Neuronal growth regulator 1	0.00773885	0.276641	1.57817
GO:0007155	cell adhesion	Pcdh9	Pcdh9	Protein Pcdh9	0.00773885	0.276641	1.57817
GO:0007155	cell adhesion	Pcdha1	Pcdha1	Pcdha1 protein	0.00773885	0.276641	1.57817
GO:0007155	cell adhesion	Cdh12	Cdh12	Cadherin-12	0.00773885	0.276641	1.57817
GO:0007155	cell adhesion	Dst	Dst	Dystonin	0.00773885	0.276641	1.57817
GO:0007155	cell adhesion	Prkce	Prkce	Protein kinase C epsilon type	0.00773885	0.276641	1.57817
GO:0007155	cell adhesion	Amtn	Amtn	Amelotin	0.00773885	0.276641	1.57817
GO:0007155	cell adhesion	Fat4	Fat4	Protocadherin Fat 4	0.00773885	0.276641	1.57817
GO:0007155	cell adhesion	Cdh11	Cdh11	Cadherin-11	0.00773885	0.276641	1.57817
GO:0007155	cell adhesion	Pgm5	Pgm5	Pgm5 protein	0.00773885	0.276641	1.57817
GO:0007155	cell adhesion	Pcdhga4	Pcdhga4	Protocadherin gamma-A4	0.00773885	0.276641	1.57817
GO:0007155	cell adhesion	Cdh5	Cdh5	Cadherin-5	0.00773885	0.276641	1.57817
GO:0007155	cell adhesion	Cdh20	Cdh20	Cadherin-20	0.00773885	0.276641	1.57817
GO:0007155	cell adhesion	Cntnap4	Cntnap4	Contactin-associated protein-like 4	0.00773885	0.276641	1.57817
GO:0007155	cell adhesion	Pcdh15	Pcdh15	Protocadherin-15	0.00773885	0.276641	1.57817
GO:0007155	cell adhesion	Ntm	Ntm	Neurotrimin	0.00773885	0.276641	1.57817
GO:0007155	cell adhesion	Pcdhga12	Pcdhga12	Pcdhga12 protein	0.00773885	0.276641	1.57817
GO:0007155	cell adhesion	Chl1	Chl1	Neural cell adhesion molecule L1-like protein	0.00773885	0.276641	1.57817
GO:0003161	cardiac conduction system development	Nrg1	Nrg1	Type III neuregulin 1	0.00791893	0.276641	13.4144
GO:0003161	cardiac conduction system development	Cdc42	Cdc42	Cell division control protein 42 homolog	0.00791893	0.276641	13.4144
GO:0016577	histone demethylation	Kdm6b	Kdm6b	Putative uncharacterized protein	0.00791893	0.276641	13.4144
GO:0016577	histone demethylation	Kdm2b	Kdm2b	Lysine-specific demethylase 2B	0.00791893	0.276641	13.4144
GO:0006290	pyrimidine dimer repair	Ddb2	Ddb2	DNA damage-binding protein 2	0.00791893	0.276641	13.4144
GO:0006290	pyrimidine dimer repair	Ercc6	Ercc6	Ercc6 protein	0.00791893	0.276641	13.4144
GO:0072337	modified amino acid transport	Slc22a16	Slc22a16	MCG123504	0.00791893	0.276641	13.4144
GO:0072337	modified amino acid transport	Slc22a5	Slc22a5	Solute carrier family 22 member 5	0.00791893	0.276641	13.4144
GO:0036289	peptidyl-serine autophosphorylation	Prkca	Prkca	Protein kinase C alpha type	0.00791893	0.276641	13.4144
GO:0036289	peptidyl-serine autophosphorylation	Prkg2	Prkg2	cGMP-dependent protein kinase	0.00791893	0.276641	13.4144
GO:0032252	secretory granule localization	Tcf7l2	Tcf7l2	Transcription factor 7-like 2	0.00791893	0.276641	13.4144
GO:0032252	secretory granule localization	Pik3cg	Pik3cg	Phosphoinositide-3-kinase gamma polypeptide	0.00791893	0.276641	13.4144
GO:0055092	sterol homeostasis	Abcg8	Abcg8	ATP-binding cassette sub-family G member 8	0.00791893	0.276641	13.4144
GO:0055092	sterol homeostasis	Xbp1	Xbp1	X-box-binding protein 1	0.00791893	0.276641	13.4144
GO:1902603	carnitine transmembrane transport	Slc22a16	Slc22a16	MCG123504	0.00791893	0.276641	13.4144
GO:1902603	carnitine transmembrane transport	Slc22a5	Slc22a5	Solute carrier family 22 member 5	0.00791893	0.276641	13.4144
GO:0048713	regulation of oligodendrocyte differentiation	Tcf7l2	Tcf7l2	Transcription factor 7-like 2	0.00791893	0.276641	13.4144
GO:0048713	regulation of oligodendrocyte differentiation	Tnfrsf21	Tnfrsf21	Putative uncharacterized protein	0.00791893	0.276641	13.4144
GO:0060842	arterial endothelial cell differentiation	Hey2	Hey2	Hairy/enhancer-of-split related with YRPW motif 2	0.00791893	0.276641	13.4144
GO:0060842	arterial endothelial cell differentiation	Hey1	Hey1	Putative uncharacterized protein	0.00791893	0.276641	13.4144
GO:0050829	defense response to Gram-negative bacterium	Cd4	Cd4	T4 surface glycoprotein	0.00806288	0.276641	3.94542
GO:0050829	defense response to Gram-negative bacterium	Il12b	Il12b	Interleukin-12 subunit beta	0.00806288	0.276641	3.94542
GO:0050829	defense response to Gram-negative bacterium	Cd160	Cd160	CD160 antigen	0.00806288	0.276641	3.94542
GO:0050829	defense response to Gram-negative bacterium	Defb12	Defb12	Beta-defensin 12	0.00806288	0.276641	3.94542
GO:0050829	defense response to Gram-negative bacterium	Reg3b	Reg3b	Regenerating islet-derived protein 3-beta	0.00806288	0.276641	3.94542
GO:0043433	negative regulation of sequence-specific DNA binding transcription factor activity	Tcf7l2	Tcf7l2	Transcription factor 7-like 2	0.00807767	0.276641	3.02906
GO:0043433	negative regulation of sequence-specific DNA binding transcription factor activity	Id2	Id2	DNA-binding protein inhibitor ID-2	0.00807767	0.276641	3.02906
GO:0043433	negative regulation of sequence-specific DNA binding transcription factor activity	Sirt1	Sirt1	Sirt1 protein	0.00807767	0.276641	3.02906
GO:0043433	negative regulation of sequence-specific DNA binding transcription factor activity	Igf1r	Igf1r	Tyrosine-protein kinase receptor	0.00807767	0.276641	3.02906
GO:0043433	negative regulation of sequence-specific DNA binding transcription factor activity	Pla2g10	Pla2g10	Phospholipase A(2)	0.00807767	0.276641	3.02906
GO:0043433	negative regulation of sequence-specific DNA binding transcription factor activity	Tnfsf4	Tnfsf4	Tumor necrosis factor (Ligand) superfamily member 4	0.00807767	0.276641	3.02906
GO:0043433	negative regulation of sequence-specific DNA binding transcription factor activity	Kdm1a	Kdm1a	Lysine-specific histone demethylase 1A	0.00807767	0.276641	3.02906
GO:0045444	fat cell differentiation	Tcf7l2	Tcf7l2	Transcription factor 7-like 2	0.0088029	0.276641	2.98098
GO:0045444	fat cell differentiation	Arl6	Arl6	ADP-ribosylation factor-like protein 6	0.0088029	0.276641	2.98098
GO:0045444	fat cell differentiation	Nipbl	Nipbl	Nipbl protein	0.0088029	0.276641	2.98098
GO:0045444	fat cell differentiation	Lrrc8c	Lrrc8c	Volume-regulated anion channel subunit LRRC8C	0.0088029	0.276641	2.98098
GO:0045444	fat cell differentiation	Runx1t1	Runx1t1	Protein CBFA2T1	0.0088029	0.276641	2.98098
GO:0045444	fat cell differentiation	Lpin1	Lpin1	Phosphatidate phosphatase LPIN1	0.0088029	0.276641	2.98098
GO:0045444	fat cell differentiation	Mettl8	Mettl8	Methyltransferase-like protein 8	0.0088029	0.276641	2.98098
GO:0040037	negative regulation of fibroblast growth factor receptor signaling pathway	Tcf7l2	Tcf7l2	Transcription factor 7-like 2	0.0088208	0.276641	6.70721
GO:0040037	negative regulation of fibroblast growth factor receptor signaling pathway	Sulf1	Sulf1	Extracellular sulfatase Sulf-1	0.0088208	0.276641	6.70721
GO:0040037	negative regulation of fibroblast growth factor receptor signaling pathway	Spry2	Spry2	Sprouty homolog 2 (Drosophila)	0.0088208	0.276641	6.70721
GO:0003222	ventricular trabecula myocardium morphogenesis	Nrg1	Nrg1	Type III neuregulin 1	0.0088208	0.276641	6.70721
GO:0003222	ventricular trabecula myocardium morphogenesis	Hey2	Hey2	Hairy/enhancer-of-split related with YRPW motif 2	0.0088208	0.276641	6.70721
GO:0003222	ventricular trabecula myocardium morphogenesis	Hey1	Hey1	Putative uncharacterized protein	0.0088208	0.276641	6.70721
GO:0060317	cardiac epithelial to mesenchymal transition	Hey2	Hey2	Hairy/enhancer-of-split related with YRPW motif 2	0.0088208	0.276641	6.70721
GO:0060317	cardiac epithelial to mesenchymal transition	Wnt2	Wnt2	Protein Wnt-2	0.0088208	0.276641	6.70721
GO:0060317	cardiac epithelial to mesenchymal transition	Hey1	Hey1	Putative uncharacterized protein	0.0088208	0.276641	6.70721
GO:0032793	positive regulation of CREB transcription factor activity	Cacna1d	Cacna1d	Cacna1d protein	0.0088208	0.276641	6.70721
GO:0032793	positive regulation of CREB transcription factor activity	Epha5	Epha5	Receptor protein-tyrosine kinase	0.0088208	0.276641	6.70721
GO:0032793	positive regulation of CREB transcription factor activity	Prkd1	Prkd1	Serine/threonine-protein kinase D1	0.0088208	0.276641	6.70721
GO:0016310	phosphorylation	Mob1b	Mob1b	MOB1, Mps One Binder kinase activator-like 1A (Yeast), isoform CRA_c	0.00885709	0.276641	1.49049
GO:0016310	phosphorylation	Pik3c3	Pik3c3	Phosphatidylinositol 3-kinase catalytic subunit type 3	0.00885709	0.276641	1.49049
GO:0016310	phosphorylation	Prkacb	Prkacb	cAMP-dependent protein kinase catalytic subunit beta transcript variant 5	0.00885709	0.276641	1.49049
GO:0016310	phosphorylation	Prkdc	Prkdc	DNA-dependent protein kinase catalytic subunit	0.00885709	0.276641	1.49049
GO:0016310	phosphorylation	Nme6	Nme6	Nucleoside diphosphate kinase 6	0.00885709	0.276641	1.49049
GO:0016310	phosphorylation	Idnk	Idnk	Probable gluconokinase	0.00885709	0.276641	1.49049
GO:0016310	phosphorylation	Tlk2	Tlk2	Serine/threonine-protein kinase tousled-like 2	0.00885709	0.276641	1.49049
GO:0016310	phosphorylation	Cdk14	Cdk14	Cyclin-dependent kinase 14	0.00885709	0.276641	1.49049
GO:0016310	phosphorylation	Stk31	Stk31	Serine/threonine-protein kinase 31	0.00885709	0.276641	1.49049
GO:0016310	phosphorylation	Hk1	Hk1	Hexokinase 1	0.00885709	0.276641	1.49049
GO:0016310	phosphorylation	Pik3c2g	Pik3c2g	Phosphatidylinositol 4-phosphate 3-kinase C2 domain-containing subunit gamma	0.00885709	0.276641	1.49049
GO:0016310	phosphorylation	Pmvk	Pmvk	Phosphomevalonate kinase	0.00885709	0.276641	1.49049
GO:0016310	phosphorylation	Pi4ka	Pi4ka	Protein Pi4ka	0.00885709	0.276641	1.49049
GO:0016310	phosphorylation	Agk	Agk	Acylglycerol kinase, mitochondrial	0.00885709	0.276641	1.49049
GO:0016310	phosphorylation	Prkca	Prkca	Protein kinase C alpha type	0.00885709	0.276641	1.49049
GO:0016310	phosphorylation	Prkg2	Prkg2	cGMP-dependent protein kinase	0.00885709	0.276641	1.49049
GO:0016310	phosphorylation	Epha3	Epha3	Receptor protein-tyrosine kinase	0.00885709	0.276641	1.49049
GO:0016310	phosphorylation	Kalrn	Kalrn	Kalirin	0.00885709	0.276641	1.49049
GO:0016310	phosphorylation	Akt2	Akt2	RAC-beta serine/threonine-protein kinase	0.00885709	0.276641	1.49049
GO:0016310	phosphorylation	Map3k1	Map3k1	Mitogen-activated protein kinase kinase kinase 1	0.00885709	0.276641	1.49049
GO:0016310	phosphorylation	Ttn	Ttn	Titin	0.00885709	0.276641	1.49049
GO:0016310	phosphorylation	Lmtk2	Lmtk2	Serine/threonine-protein kinase LMTK2	0.00885709	0.276641	1.49049
GO:0016310	phosphorylation	Epha5	Epha5	Receptor protein-tyrosine kinase	0.00885709	0.276641	1.49049
GO:0016310	phosphorylation	Stk17b	Stk17b	Serine/threonine-protein kinase 17B	0.00885709	0.276641	1.49049
GO:0016310	phosphorylation	Igf1r	Igf1r	Tyrosine-protein kinase receptor	0.00885709	0.276641	1.49049
GO:0016310	phosphorylation	Prkce	Prkce	Protein kinase C epsilon type	0.00885709	0.276641	1.49049
GO:0016310	phosphorylation	Tk2	Tk2	Thymidine kinase 2, mitochondrial, isoform CRA_b	0.00885709	0.276641	1.49049
GO:0016310	phosphorylation	Prkd1	Prkd1	Serine/threonine-protein kinase D1	0.00885709	0.276641	1.49049
GO:0016310	phosphorylation	Slk	Slk	Slk protein	0.00885709	0.276641	1.49049
GO:0016310	phosphorylation	Map3k7	Map3k7	Mitogen-activated protein kinase kinase kinase 7	0.00885709	0.276641	1.49049
GO:0016310	phosphorylation	Sgk1	Sgk1	Serine/threonine-protein kinase Sgk1	0.00885709	0.276641	1.49049
GO:0016310	phosphorylation	Dgkq	Dgkq	Diacylglycerol kinase theta	0.00885709	0.276641	1.49049
GO:0016310	phosphorylation	Eif2ak4	Eif2ak4	Eukaryotic translation initiation factor 2-alpha kinase 4	0.00885709	0.276641	1.49049
GO:0016310	phosphorylation	Nme4	Nme4	Nucleoside diphosphate kinase	0.00885709	0.276641	1.49049
GO:0016310	phosphorylation	Pik3cg	Pik3cg	Phosphoinositide-3-kinase gamma polypeptide	0.00885709	0.276641	1.49049
GO:0016310	phosphorylation	Zak	Zak	Mitogen-activated protein kinase kinase kinase MLT	0.00885709	0.276641	1.49049
GO:0016310	phosphorylation	Csk	Csk	Tyrosine-protein kinase CSK	0.00885709	0.276641	1.49049
GO:0016310	phosphorylation	Dgkz	Dgkz	Diacylglycerol kinase zeta	0.00885709	0.276641	1.49049
GO:0016310	phosphorylation	Pacsin2	Pacsin2	Protein kinase C and casein kinase substrate in neurons 2, isoform CRA_a	0.00885709	0.276641	1.49049
GO:0007605	sensory perception of sound	Cemip	Cemip	Uncharacterized protein	0.00943363	0.276641	2.27013
GO:0007605	sensory perception of sound	Cacna1d	Cacna1d	Cacna1d protein	0.00943363	0.276641	2.27013
GO:0007605	sensory perception of sound	Nipbl	Nipbl	Nipbl protein	0.00943363	0.276641	2.27013
GO:0007605	sensory perception of sound	Clic5	Clic5	Chloride intracellular channel protein 5	0.00943363	0.276641	2.27013
GO:0007605	sensory perception of sound	Srrm4	Srrm4	Serine/arginine repetitive matrix protein 4	0.00943363	0.276641	2.27013
GO:0007605	sensory perception of sound	Slitrk6	Slitrk6	SLIT and NTRK-like family, member 6	0.00943363	0.276641	2.27013
GO:0007605	sensory perception of sound	Spry2	Spry2	Sprouty homolog 2 (Drosophila)	0.00943363	0.276641	2.27013
GO:0007605	sensory perception of sound	Gabrb2	Gabrb2	Gamma-aminobutyric acid receptor subunit beta-2	0.00943363	0.276641	2.27013
GO:0007605	sensory perception of sound	Six1	Six1	Putative uncharacterized protein	0.00943363	0.276641	2.27013
GO:0007605	sensory perception of sound	Pcdh15	Pcdh15	Protocadherin-15	0.00943363	0.276641	2.27013
GO:0007605	sensory perception of sound	Tjp1	Tjp1	Tjp1 protein	0.00943363	0.276641	2.27013
GO:1902476	chloride transmembrane transport	Slc4a1	Slc4a1	Band 3 anion transport protein	0.00982477	0.276641	2.68289
GO:1902476	chloride transmembrane transport	Slc26a4	Slc26a4	Solute carrier family 26, member 4	0.00982477	0.276641	2.68289
GO:1902476	chloride transmembrane transport	Chrm5	Chrm5	Muscarinic acetylcholine receptor M5	0.00982477	0.276641	2.68289
GO:1902476	chloride transmembrane transport	Gabrg1	Gabrg1	GABA-A receptor gamma-1 subunit	0.00982477	0.276641	2.68289
GO:1902476	chloride transmembrane transport	Clic5	Clic5	Chloride intracellular channel protein 5	0.00982477	0.276641	2.68289
GO:1902476	chloride transmembrane transport	Clcn4	Clcn4-2	Chloride channel protein	0.00982477	0.276641	2.68289
GO:1902476	chloride transmembrane transport	Gabrb2	Gabrb2	Gamma-aminobutyric acid receptor subunit beta-2	0.00982477	0.276641	2.68289
GO:1902476	chloride transmembrane transport	Clcc1	Clcc1	Chloride channel CLIC-like 1, isoform CRA_a	0.00982477	0.276641	2.68289
GO:0001525	angiogenesis	Sema3e	Sema3e	Semaphorin-3E	0.0100579	0.276641	1.91635
GO:0001525	angiogenesis	Wasf2	Wasf2	Wiskott-Aldrich syndrome protein family member 2	0.0100579	0.276641	1.91635
GO:0001525	angiogenesis	Itgav	Itgav	Integrin alpha-V	0.0100579	0.276641	1.91635
GO:0001525	angiogenesis	Vegfb	Vegfb	Vascular endothelial growth factor B	0.0100579	0.276641	1.91635
GO:0001525	angiogenesis	Sirt1	Sirt1	Sirt1 protein	0.0100579	0.276641	1.91635
GO:0001525	angiogenesis	Prkca	Prkca	Protein kinase C alpha type	0.0100579	0.276641	1.91635
GO:0001525	angiogenesis	Xbp1	Xbp1	X-box-binding protein 1	0.0100579	0.276641	1.91635
GO:0001525	angiogenesis	C1galt1	C1galt1	Glycoprotein-N-acetylgalactosamine 3-beta-galactosyltransferase 1	0.0100579	0.276641	1.91635
GO:0001525	angiogenesis	Thsd7a	Thsd7a	Thrombospondin type-1 domain-containing protein 7A	0.0100579	0.276641	1.91635
GO:0001525	angiogenesis	Prkd1	Prkd1	Serine/threonine-protein kinase D1	0.0100579	0.276641	1.91635
GO:0001525	angiogenesis	Map3k7	Map3k7	Mitogen-activated protein kinase kinase kinase 7	0.0100579	0.276641	1.91635
GO:0001525	angiogenesis	Hey1	Hey1	Putative uncharacterized protein	0.0100579	0.276641	1.91635
GO:0001525	angiogenesis	Fgf9	Fgf9	Fibroblast growth factor 9	0.0100579	0.276641	1.91635
GO:0001525	angiogenesis	Meis1	Meis1	Homeobox protein Meis1	0.0100579	0.276641	1.91635
GO:0001525	angiogenesis	Pik3cg	Pik3cg	Phosphoinositide-3-kinase gamma polypeptide	0.0100579	0.276641	1.91635
GO:0001525	angiogenesis	Pknox1	Pknox1	Homeobox protein PKNOX1	0.0100579	0.276641	1.91635
GO:0007626	locomotory behavior	Nrg1	Nrg1	Type III neuregulin 1	0.0102337	0.276641	2.48927
GO:0007626	locomotory behavior	Elavl4	Elavl4	ELAV-like protein 4	0.0102337	0.276641	2.48927
GO:0007626	locomotory behavior	Etv5	Etv5	ETS translocation variant 5	0.0102337	0.276641	2.48927
GO:0007626	locomotory behavior	Negr1	Negr1	Neuronal growth regulator 1	0.0102337	0.276641	2.48927
GO:0007626	locomotory behavior	Slc22a5	Slc22a5	Solute carrier family 22 member 5	0.0102337	0.276641	2.48927
GO:0007626	locomotory behavior	Meis1	Meis1	Homeobox protein Meis1	0.0102337	0.276641	2.48927
GO:0007626	locomotory behavior	Klhl1	Klhl1	Putative uncharacterized protein	0.0102337	0.276641	2.48927
GO:0007626	locomotory behavior	Oprm1	Oprm1	Mu opioid receptor mMOR-1R2	0.0102337	0.276641	2.48927
GO:0007626	locomotory behavior	Pcdh15	Pcdh15	Protocadherin-15	0.0102337	0.276641	2.48927
GO:0036092	phosphatidylinositol-3-phosphate biosynthetic process	Pik3c3	Pik3c3	Phosphatidylinositol 3-kinase catalytic subunit type 3	0.0111531	0.276641	6.19127
GO:0036092	phosphatidylinositol-3-phosphate biosynthetic process	Pik3c2g	Pik3c2g	Phosphatidylinositol 4-phosphate 3-kinase C2 domain-containing subunit gamma	0.0111531	0.276641	6.19127
GO:0036092	phosphatidylinositol-3-phosphate biosynthetic process	Pik3cg	Pik3cg	Phosphoinositide-3-kinase gamma polypeptide	0.0111531	0.276641	6.19127
GO:2000678	negative regulation of transcription regulatory region DNA binding	Hey2	Hey2	Hairy/enhancer-of-split related with YRPW motif 2	0.0111531	0.276641	6.19127
GO:2000678	negative regulation of transcription regulatory region DNA binding	Hey1	Hey1	Putative uncharacterized protein	0.0111531	0.276641	6.19127
GO:2000678	negative regulation of transcription regulatory region DNA binding	Lhx2	Lhx2	LIM/homeobox protein Lhx2	0.0111531	0.276641	6.19127
GO:0050435	beta-amyloid metabolic process	Ncstn	Ncstn	Nicastrin	0.0111531	0.276641	6.19127
GO:0050435	beta-amyloid metabolic process	C330021F23Rik	C330021F23Rik	Protein C330021F23Rik	0.0111531	0.276641	6.19127
GO:0050435	beta-amyloid metabolic process	Ace	Ace	Angiotensin-converting enzyme	0.0111531	0.276641	6.19127
GO:0035418	protein localization to synapse	Shank1	Shank1	SH3 and multiple ankyrin repeat domains protein 1	0.0111531	0.276641	6.19127
GO:0035418	protein localization to synapse	Nlgn1	Nlgn1	Neuroligin-1	0.0111531	0.276641	6.19127
GO:0035418	protein localization to synapse	Klc1	Klc1	Kinesin light chain 1T	0.0111531	0.276641	6.19127
GO:0021772	olfactory bulb development	Id2	Id2	DNA-binding protein inhibitor ID-2	0.011232	0.276641	4.47148
GO:0021772	olfactory bulb development	Sema3a	Sema3a	Semaphorin-3A	0.011232	0.276641	4.47148
GO:0021772	olfactory bulb development	Kif14	Kif14	Kinesin-like protein	0.011232	0.276641	4.47148
GO:0021772	olfactory bulb development	Lhx2	Lhx2	LIM/homeobox protein Lhx2	0.011232	0.276641	4.47148
GO:0035556	intracellular signal transduction	Rasal1	Rasal1	RasGAP-activating-like protein 1	0.011401	0.276641	1.65525
GO:0035556	intracellular signal transduction	Tlk2	Tlk2	Serine/threonine-protein kinase tousled-like 2	0.011401	0.276641	1.65525
GO:0035556	intracellular signal transduction	Rasgrp4	Rasgrp4	RAS guanyl-releasing protein 4	0.011401	0.276641	1.65525
GO:0035556	intracellular signal transduction	Prkca	Prkca	Protein kinase C alpha type	0.011401	0.276641	1.65525
GO:0035556	intracellular signal transduction	Twf2	Twf2	Twinfilin-2	0.011401	0.276641	1.65525
GO:0035556	intracellular signal transduction	Kalrn	Kalrn	Kalirin	0.011401	0.276641	1.65525
GO:0035556	intracellular signal transduction	Nrg2	Nrg2	Pro-neuregulin-2, membrane-bound isoform	0.011401	0.276641	1.65525
GO:0035556	intracellular signal transduction	Asb11	Asb11	Ankyrin repeat and SOCS box protein 11	0.011401	0.276641	1.65525
GO:0035556	intracellular signal transduction	Gmip	Gmip	GEM-interacting protein	0.011401	0.276641	1.65525
GO:0035556	intracellular signal transduction	Rasgrp3	Rasgrp3	RasGRP3	0.011401	0.276641	1.65525
GO:0035556	intracellular signal transduction	Plcb4	Plcb4	Phosphoinositide phospholipase C	0.011401	0.276641	1.65525
GO:0035556	intracellular signal transduction	Stk17b	Stk17b	Serine/threonine-protein kinase 17B	0.011401	0.276641	1.65525
GO:0035556	intracellular signal transduction	Prkce	Prkce	Protein kinase C epsilon type	0.011401	0.276641	1.65525
GO:0035556	intracellular signal transduction	Spata13	Spata13	Spata13 protein	0.011401	0.276641	1.65525
GO:0035556	intracellular signal transduction	Prkd1	Prkd1	Serine/threonine-protein kinase D1	0.011401	0.276641	1.65525
GO:0035556	intracellular signal transduction	Slk	Slk	Slk protein	0.011401	0.276641	1.65525
GO:0035556	intracellular signal transduction	Dgkq	Dgkq	Diacylglycerol kinase theta	0.011401	0.276641	1.65525
GO:0035556	intracellular signal transduction	Dab1	Dab1	Disabled homolog 1 (Drosophila), isoform CRA_a	0.011401	0.276641	1.65525
GO:0035556	intracellular signal transduction	Dnmbp	Dnmbp	Dynamin-binding protein	0.011401	0.276641	1.65525
GO:0035556	intracellular signal transduction	Rapgef5	Rapgef5	Putative uncharacterized protein	0.011401	0.276641	1.65525
GO:0035556	intracellular signal transduction	Zak	Zak	Mitogen-activated protein kinase kinase kinase MLT	0.011401	0.276641	1.65525
GO:0035556	intracellular signal transduction	Csk	Csk	Tyrosine-protein kinase CSK	0.011401	0.276641	1.65525
GO:0035556	intracellular signal transduction	Dgkz	Dgkz	Diacylglycerol kinase zeta	0.011401	0.276641	1.65525
GO:0035556	intracellular signal transduction	Rapgef4	Rapgef4	Rapgef4 protein	0.011401	0.276641	1.65525
GO:0035335	peptidyl-tyrosine dephosphorylation	Ubash3b	Ubash3b	Ubiquitin-associated and SH3 domain-containing protein B	0.0116146	0.276641	2.43899
GO:0035335	peptidyl-tyrosine dephosphorylation	Ssh1	Ssh1	Protein phosphatase Slingshot homolog 1	0.0116146	0.276641	2.43899
GO:0035335	peptidyl-tyrosine dephosphorylation	Cdc14a	Cdc14a	Dual specificity protein phosphatase CDC14A	0.0116146	0.276641	2.43899
GO:0035335	peptidyl-tyrosine dephosphorylation	Timm50	Timm50	Putative uncharacterized protein	0.0116146	0.276641	2.43899
GO:0035335	peptidyl-tyrosine dephosphorylation	Dusp3	Dusp3	Dual-specificity protein phosphatase 3	0.0116146	0.276641	2.43899
GO:0035335	peptidyl-tyrosine dephosphorylation	Ptpn22	Ptpn22	Protein-tyrosine-phosphatase	0.0116146	0.276641	2.43899
GO:0035335	peptidyl-tyrosine dephosphorylation	Dusp4	Dusp4	Dual specificity protein phosphatase 4	0.0116146	0.276641	2.43899
GO:0035335	peptidyl-tyrosine dephosphorylation	Ptpro	Ptpro	Protein-tyrosine-phosphatase	0.0116146	0.276641	2.43899
GO:0035335	peptidyl-tyrosine dephosphorylation	Dnajc6	Dnajc6	Putative tyrosine-protein phosphatase auxilin	0.0116146	0.276641	2.43899
GO:0001822	kidney development	Dcn	Dcn	Decorin	0.0128484	0.276641	2.27363
GO:0001822	kidney development	Sulf1	Sulf1	Extracellular sulfatase Sulf-1	0.0128484	0.276641	2.27363
GO:0001822	kidney development	C1galt1	C1galt1	Glycoprotein-N-acetylgalactosamine 3-beta-galactosyltransferase 1	0.0128484	0.276641	2.27363
GO:0001822	kidney development	Gli2	Gli2	GLI-Kruppel family member	0.0128484	0.276641	2.27363
GO:0001822	kidney development	Agtr1a	Agtr1a	Type-1A angiotensin II receptor	0.0128484	0.276641	2.27363
GO:0001822	kidney development	Wt1	Wt1	Wilms tumor protein homolog	0.0128484	0.276641	2.27363
GO:0001822	kidney development	Fat4	Fat4	Protocadherin Fat 4	0.0128484	0.276641	2.27363
GO:0001822	kidney development	Six1	Six1	Putative uncharacterized protein	0.0128484	0.276641	2.27363
GO:0001822	kidney development	Ace	Ace	Angiotensin-converting enzyme	0.0128484	0.276641	2.27363
GO:0001822	kidney development	Smad1	Smad1	Mothers against decapentaplegic homolog 1	0.0128484	0.276641	2.27363
GO:0007567	parturition	Rxfp1	Rxfp1	Relaxin receptor 1	0.0128731	0.276641	10.7315
GO:0007567	parturition	Hpgd	Hpgd	15-hydroxyprostaglandin dehydrogenase [NAD(+)]	0.0128731	0.276641	10.7315
GO:0001780	neutrophil homeostasis	Mecom	Mecom	Evi1 protein	0.0128731	0.276641	10.7315
GO:0001780	neutrophil homeostasis	Pde4b	Pde4b	Protein Pde4b	0.0128731	0.276641	10.7315
GO:0061551	trigeminal ganglion development	Sema3a	Sema3a	Semaphorin-3A	0.0128731	0.276641	10.7315
GO:0061551	trigeminal ganglion development	Six1	Six1	Putative uncharacterized protein	0.0128731	0.276641	10.7315
GO:2000369	regulation of clathrin-mediated endocytosis	Snap91	Snap91	Clathrin coat assembly protein AP180	0.0128731	0.276641	10.7315
GO:2000369	regulation of clathrin-mediated endocytosis	Dnajc6	Dnajc6	Putative tyrosine-protein phosphatase auxilin	0.0128731	0.276641	10.7315
GO:0032754	positive regulation of interleukin-5 production	Il33	Il33	Interleukin-33	0.0128731	0.276641	10.7315
GO:0032754	positive regulation of interleukin-5 production	Pde4d	Pde4d	Phosphodiesterase 4D, cAMP specific	0.0128731	0.276641	10.7315
GO:0032736	positive regulation of interleukin-13 production	Il33	Il33	Interleukin-33	0.0128731	0.276641	10.7315
GO:0032736	positive regulation of interleukin-13 production	Tnfsf4	Tnfsf4	Tumor necrosis factor (Ligand) superfamily member 4	0.0128731	0.276641	10.7315
GO:0033554	cellular response to stress	Crhbp	Crhbp	Putative uncharacterized protein	0.0128731	0.276641	10.7315
GO:0033554	cellular response to stress	Oprm1	Oprm1	Mu opioid receptor mMOR-1R2	0.0128731	0.276641	10.7315
GO:0036336	dendritic cell migration	Cdc42	Cdc42	Cell division control protein 42 homolog	0.0128731	0.276641	10.7315
GO:0036336	dendritic cell migration	Eps8	Eps8	Epidermal growth factor receptor kinase substrate 8	0.0128731	0.276641	10.7315
GO:0051971	positive regulation of transmission of nerve impulse	Tnr	Tnr	Tenascin-R	0.0128731	0.276641	10.7315
GO:0051971	positive regulation of transmission of nerve impulse	Cartpt	Cartpt	Cocaine- and amphetamine-regulated transcript protein	0.0128731	0.276641	10.7315
GO:0035912	dorsal aorta morphogenesis	Hey2	Hey2	Hairy/enhancer-of-split related with YRPW motif 2	0.0128731	0.276641	10.7315
GO:0035912	dorsal aorta morphogenesis	Hey1	Hey1	Putative uncharacterized protein	0.0128731	0.276641	10.7315
GO:0019388	galactose catabolic process	Pgm5	Pgm5	Pgm5 protein	0.0128731	0.276641	10.7315
GO:0019388	galactose catabolic process	Pgm2	Pgm1	Phosphoglucomutase-2	0.0128731	0.276641	10.7315
GO:0080009	mRNA methylation	Mettl14	Mettl14	N6-adenosine-methyltransferase subunit METTL14	0.0128731	0.276641	10.7315
GO:0080009	mRNA methylation	Mettl3	Mettl3	N6-adenosine-methyltransferase subunit METTL3	0.0128731	0.276641	10.7315
GO:0015879	carnitine transport	Slc22a16	Slc22a16	MCG123504	0.0128731	0.276641	10.7315
GO:0015879	carnitine transport	Slc22a5	Slc22a5	Solute carrier family 22 member 5	0.0128731	0.276641	10.7315
GO:0006606	protein import into nucleus	Ppp3ca	Ppp3ca	Serine/threonine-protein phosphatase 2B catalytic subunit alpha isoform	0.0128777	0.276641	3.53011
GO:0006606	protein import into nucleus	Tmco6	Tmco6	Transmembrane and coiled-coil domain-containing protein 6	0.0128777	0.276641	3.53011
GO:0006606	protein import into nucleus	Fgf9	Fgf9	Fibroblast growth factor 9	0.0128777	0.276641	3.53011
GO:0006606	protein import into nucleus	Kpna4	Kpna4	Importin subunit alpha-3	0.0128777	0.276641	3.53011
GO:0006606	protein import into nucleus	Six3	Six3	Homeobox protein SIX3	0.0128777	0.276641	3.53011
GO:0070979	protein K11-linked ubiquitination	Ube2a	Ube2a	Putative uncharacterized protein	0.0129851	0.276641	4.29262
GO:0070979	protein K11-linked ubiquitination	Ube2d2b	Ube2d2b	Ubiquitin-conjugating enzyme E2 D2B	0.0129851	0.276641	4.29262
GO:0070979	protein K11-linked ubiquitination	Cdc23	Cdc23	Cell division cycle protein 23 homolog	0.0129851	0.276641	4.29262
GO:0070979	protein K11-linked ubiquitination	Anapc1	Anapc1	Anaphase-promoting complex subunit 1	0.0129851	0.276641	4.29262
GO:0006821	chloride transport	Slc4a1	Slc4a1	Band 3 anion transport protein	0.0129918	0.276641	2.55513
GO:0006821	chloride transport	Slc26a4	Slc26a4	Solute carrier family 26, member 4	0.0129918	0.276641	2.55513
GO:0006821	chloride transport	Chrm5	Chrm5	Muscarinic acetylcholine receptor M5	0.0129918	0.276641	2.55513
GO:0006821	chloride transport	Gabrg1	Gabrg1	GABA-A receptor gamma-1 subunit	0.0129918	0.276641	2.55513
GO:0006821	chloride transport	Clic5	Clic5	Chloride intracellular channel protein 5	0.0129918	0.276641	2.55513
GO:0006821	chloride transport	Clcn4	Clcn4-2	Chloride channel protein	0.0129918	0.276641	2.55513
GO:0006821	chloride transport	Gabrb2	Gabrb2	Gamma-aminobutyric acid receptor subunit beta-2	0.0129918	0.276641	2.55513
GO:0006821	chloride transport	Clcc1	Clcc1	Chloride channel CLIC-like 1, isoform CRA_a	0.0129918	0.276641	2.55513
GO:0010667	negative regulation of cardiac muscle cell apoptotic process	Nrg1	Nrg1	Type III neuregulin 1	0.0138071	0.276641	5.74904
GO:0010667	negative regulation of cardiac muscle cell apoptotic process	Sirt1	Sirt1	Sirt1 protein	0.0138071	0.276641	5.74904
GO:0010667	negative regulation of cardiac muscle cell apoptotic process	Hey2	Hey2	Hairy/enhancer-of-split related with YRPW motif 2	0.0138071	0.276641	5.74904
GO:0045600	positive regulation of fat cell differentiation	Dkkl1	Dkkl1	Putative uncharacterized protein	0.0158882	0.276641	3.35361
GO:0045600	positive regulation of fat cell differentiation	Id2	Id2	DNA-binding protein inhibitor ID-2	0.0158882	0.276641	3.35361
GO:0045600	positive regulation of fat cell differentiation	Xbp1	Xbp1	X-box-binding protein 1	0.0158882	0.276641	3.35361
GO:0045600	positive regulation of fat cell differentiation	Lmo3	Lmo3	LIM domain only protein 3	0.0158882	0.276641	3.35361
GO:0045600	positive regulation of fat cell differentiation	Frzb	Frzb	Secreted frizzled-related protein 3	0.0158882	0.276641	3.35361
GO:0051279	regulation of release of sequestered calcium ion into cytosol	Ubash3b	Ubash3b	Ubiquitin-associated and SH3 domain-containing protein B	0.0167884	0.276641	5.36577
GO:0051279	regulation of release of sequestered calcium ion into cytosol	Prkce	Prkce	Protein kinase C epsilon type	0.0167884	0.276641	5.36577
GO:0051279	regulation of release of sequestered calcium ion into cytosol	Prkd1	Prkd1	Serine/threonine-protein kinase D1	0.0167884	0.276641	5.36577
GO:2000310	regulation of N-methyl-D-aspartate selective glutamate receptor activity	Nlgn1	Nlgn1	Neuroligin-1	0.0167884	0.276641	5.36577
GO:2000310	regulation of N-methyl-D-aspartate selective glutamate receptor activity	Crhbp	Crhbp	Putative uncharacterized protein	0.0167884	0.276641	5.36577
GO:2000310	regulation of N-methyl-D-aspartate selective glutamate receptor activity	Oprm1	Oprm1	Mu opioid receptor mMOR-1R2	0.0167884	0.276641	5.36577
GO:0016126	sterol biosynthetic process	Cyb5r3	Cyb5r3	NADH-cytochrome b5 reductase 3	0.016991	0.276641	3.97464
GO:0016126	sterol biosynthetic process	Cyb5r2	Cyb5r2	NADH-cytochrome b5 reductase 2	0.016991	0.276641	3.97464
GO:0016126	sterol biosynthetic process	Pmvk	Pmvk	Phosphomevalonate kinase	0.016991	0.276641	3.97464
GO:0016126	sterol biosynthetic process	Idi1	Idi1	Isopentenyl-diphosphate delta isomerase	0.016991	0.276641	3.97464
GO:0051017	actin filament bundle assembly	Cdc42	Cdc42	Cell division control protein 42 homolog	0.016991	0.276641	3.97464
GO:0051017	actin filament bundle assembly	Eps8	Eps8	Epidermal growth factor receptor kinase substrate 8	0.016991	0.276641	3.97464
GO:0051017	actin filament bundle assembly	Cald1	Cald1	Protein Cald1	0.016991	0.276641	3.97464
GO:0051017	actin filament bundle assembly	Lima1	Lima1	Putative uncharacterized protein	0.016991	0.276641	3.97464
GO:0009117	nucleotide metabolic process	Nme6	Nme6	Nucleoside diphosphate kinase 6	0.016991	0.276641	3.97464
GO:0009117	nucleotide metabolic process	Fhit	Fhit	Bis(5'-adenosyl)-triphosphatase	0.016991	0.276641	3.97464
GO:0009117	nucleotide metabolic process	Nme4	Nme4	Nucleoside diphosphate kinase	0.016991	0.276641	3.97464
GO:0009117	nucleotide metabolic process	Gmpr	Gmpr	GMP reductase 1	0.016991	0.276641	3.97464
GO:0007628	adult walking behavior	Abhd12	Abhd12	Monoacylglycerol lipase ABHD12	0.0175553	0.276641	3.27181
GO:0007628	adult walking behavior	Dab1	Dab1	Disabled homolog 1 (Drosophila), isoform CRA_a	0.0175553	0.276641	3.27181
GO:0007628	adult walking behavior	Klhl1	Klhl1	Putative uncharacterized protein	0.0175553	0.276641	3.27181
GO:0007628	adult walking behavior	Gbx1	Gbx1	Homeobox protein GBX-1	0.0175553	0.276641	3.27181
GO:0007628	adult walking behavior	Pcdh15	Pcdh15	Protocadherin-15	0.0175553	0.276641	3.27181
GO:0002062	chondrocyte differentiation	Prkca	Prkca	Protein kinase C alpha type	0.0175553	0.276641	3.27181
GO:0002062	chondrocyte differentiation	Gli2	Gli2	GLI-Kruppel family member	0.0175553	0.276641	3.27181
GO:0002062	chondrocyte differentiation	Trps1	Trps1	Trichorhinophalangeal syndrome I (Human), isoform CRA_b	0.0175553	0.276641	3.27181
GO:0002062	chondrocyte differentiation	Fgf9	Fgf9	Fibroblast growth factor 9	0.0175553	0.276641	3.27181
GO:0002062	chondrocyte differentiation	Shox2	Shox2	Short stature homeobox protein 2	0.0175553	0.276641	3.27181
GO:0030593	neutrophil chemotaxis	Fcgr3	Fcgr3	Low affinity immunoglobulin gamma Fc region receptor III	0.0175553	0.276641	3.27181
GO:0030593	neutrophil chemotaxis	Cklf	Cklf	Chemokine-like factor	0.0175553	0.276641	3.27181
GO:0030593	neutrophil chemotaxis	Pde4d	Pde4d	Phosphodiesterase 4D, cAMP specific	0.0175553	0.276641	3.27181
GO:0030593	neutrophil chemotaxis	Prkca	Prkca	Protein kinase C alpha type	0.0175553	0.276641	3.27181
GO:0030593	neutrophil chemotaxis	Pde4b	Pde4b	Protein Pde4b	0.0175553	0.276641	3.27181
GO:0051056	regulation of small GTPase mediated signal transduction	Rasgrp4	Rasgrp4	RAS guanyl-releasing protein 4	0.0175638	0.276641	2.87452
GO:0051056	regulation of small GTPase mediated signal transduction	Iqsec3	Iqsec3	IQ motif and SEC7 domain-containing protein 3	0.0175638	0.276641	2.87452
GO:0051056	regulation of small GTPase mediated signal transduction	Rasgrp3	Rasgrp3	RasGRP3	0.0175638	0.276641	2.87452
GO:0051056	regulation of small GTPase mediated signal transduction	Rapgef5	Rapgef5	Putative uncharacterized protein	0.0175638	0.276641	2.87452
GO:0051056	regulation of small GTPase mediated signal transduction	Sipa1l1	Sipa1l1	Sipa1l1 protein	0.0175638	0.276641	2.87452
GO:0051056	regulation of small GTPase mediated signal transduction	Rapgef4	Rapgef4	Rapgef4 protein	0.0175638	0.276641	2.87452
GO:0010717	regulation of epithelial to mesenchymal transition	Pofut2	Pofut2	Protein O-fucosyltransferase 2, isoform CRA_b	0.0188355	0.276641	8.94295
GO:0010717	regulation of epithelial to mesenchymal transition	Epha3	Epha3	Receptor protein-tyrosine kinase	0.0188355	0.276641	8.94295
GO:0060976	coronary vasculature development	Vegfb	Vegfb	Vascular endothelial growth factor B	0.0188355	0.276641	8.94295
GO:0060976	coronary vasculature development	Wt1	Wt1	Wilms tumor protein homolog	0.0188355	0.276641	8.94295
GO:0090031	positive regulation of steroid hormone biosynthetic process	Igf1r	Igf1r	Tyrosine-protein kinase receptor	0.0188355	0.276641	8.94295
GO:0090031	positive regulation of steroid hormone biosynthetic process	Igf2	Igf2	Insulin-like growth factor 2	0.0188355	0.276641	8.94295
GO:0060385	axonogenesis involved in innervation	Sema3a	Sema3a	Semaphorin-3A	0.0188355	0.276641	8.94295
GO:0060385	axonogenesis involved in innervation	Col25a1	Col25a1	Col25a1 protein	0.0188355	0.276641	8.94295
GO:0006004	fucose metabolic process	B3glct	B3glct	Beta-1,3-glucosyltransferase	0.0188355	0.276641	8.94295
GO:0006004	fucose metabolic process	Pofut2	Pofut2	Protein O-fucosyltransferase 2, isoform CRA_b	0.0188355	0.276641	8.94295
GO:0007256	activation of JNKK activity	Ercc6	Ercc6	Ercc6 protein	0.0188355	0.276641	8.94295
GO:0007256	activation of JNKK activity	Map3k1	Map3k1	Mitogen-activated protein kinase kinase kinase 1	0.0188355	0.276641	8.94295
GO:0002830	positive regulation of type 2 immune response	Il33	Il33	Interleukin-33	0.0188355	0.276641	8.94295
GO:0002830	positive regulation of type 2 immune response	Tnfsf4	Tnfsf4	Tumor necrosis factor (Ligand) superfamily member 4	0.0188355	0.276641	8.94295
GO:0046834	lipid phosphorylation	Agk	Agk	Acylglycerol kinase, mitochondrial	0.0188355	0.276641	8.94295
GO:0046834	lipid phosphorylation	Dgkz	Dgkz	Diacylglycerol kinase zeta	0.0188355	0.276641	8.94295
GO:0035356	cellular triglyceride homeostasis	Sirt1	Sirt1	Sirt1 protein	0.0188355	0.276641	8.94295
GO:0035356	cellular triglyceride homeostasis	Xbp1	Xbp1	X-box-binding protein 1	0.0188355	0.276641	8.94295
GO:0001661	conditioned taste aversion	Tbr1	Tbr1	T-box brain protein 1	0.0188355	0.276641	8.94295
GO:0001661	conditioned taste aversion	Fos	Fos	Proto-oncogene c-Fos	0.0188355	0.276641	8.94295
GO:0043030	regulation of macrophage activation	Pla2g10	Pla2g10	Phospholipase A(2)	0.0188355	0.276641	8.94295
GO:0043030	regulation of macrophage activation	Slc7a2	Slc7a2	Cationic amino acid transporter 2A	0.0188355	0.276641	8.94295
GO:0007179	transforming growth factor beta receptor signaling pathway	Tgfb3	Tgfb3	Transforming growth factor beta-3	0.0188857	0.276641	2.57263
GO:0007179	transforming growth factor beta receptor signaling pathway	Fos	Fos	Proto-oncogene c-Fos	0.0188857	0.276641	2.57263
GO:0007179	transforming growth factor beta receptor signaling pathway	Gcnt2	Gcnt2	Beta-1,6-N-acetylglucosaminyltransferase B	0.0188857	0.276641	2.57263
GO:0007179	transforming growth factor beta receptor signaling pathway	Map3k1	Map3k1	Mitogen-activated protein kinase kinase kinase 1	0.0188857	0.276641	2.57263
GO:0007179	transforming growth factor beta receptor signaling pathway	Map3k7	Map3k7	Mitogen-activated protein kinase kinase kinase 7	0.0188857	0.276641	2.57263
GO:0007179	transforming growth factor beta receptor signaling pathway	Smad1	Smad1	Mothers against decapentaplegic homolog 1	0.0188857	0.276641	2.57263
GO:0007179	transforming growth factor beta receptor signaling pathway	Hpgd	Hpgd	15-hydroxyprostaglandin dehydrogenase [NAD(+)]	0.0188857	0.276641	2.57263
GO:0007049	cell cycle	Kif2b	Kif2b	Kinesin-like protein KIF2B	0.0192847	0.276641	1.46339
GO:0007049	cell cycle	Rad21	Rad21	RAD21 homolog (S. pombe)	0.0192847	0.276641	1.46339
GO:0007049	cell cycle	Pik3c3	Pik3c3	Phosphatidylinositol 3-kinase catalytic subunit type 3	0.0192847	0.276641	1.46339
GO:0007049	cell cycle	Dbf4	Dbf4	DBF4 homolog (S. cerevisiae)	0.0192847	0.276641	1.46339
GO:0007049	cell cycle	Mtus1	Mtus1	Microtubule-associated tumor suppressor 1 homolog	0.0192847	0.276641	1.46339
GO:0007049	cell cycle	Ccnd3	Ccnd3	G1/S-specific cyclin-D3	0.0192847	0.276641	1.46339
GO:0007049	cell cycle	Tlk2	Tlk2	Serine/threonine-protein kinase tousled-like 2	0.0192847	0.276641	1.46339
GO:0007049	cell cycle	Cdk14	Cdk14	Cyclin-dependent kinase 14	0.0192847	0.276641	1.46339
GO:0007049	cell cycle	Nipbl	Nipbl	Nipbl protein	0.0192847	0.276641	1.46339
GO:0007049	cell cycle	Kif20b	Kif20b	Kinesin-like protein KIF20B	0.0192847	0.276641	1.46339
GO:0007049	cell cycle	Sycp3	Sycp3	Synaptonemal complex protein 3	0.0192847	0.276641	1.46339
GO:0007049	cell cycle	Cdc42	Cdc42	Cell division control protein 42 homolog	0.0192847	0.276641	1.46339
GO:0007049	cell cycle	Cdc14a	Cdc14a	Dual specificity protein phosphatase CDC14A	0.0192847	0.276641	1.46339
GO:0007049	cell cycle	Sgol1	Sgol1	Shugoshin-like 1	0.0192847	0.276641	1.46339
GO:0007049	cell cycle	Pard6b	Pard6b	Partitioning defective 6 homolog beta	0.0192847	0.276641	1.46339
GO:0007049	cell cycle	Lmln	Lmln	Leishmanolysin-like peptidase	0.0192847	0.276641	1.46339
GO:0007049	cell cycle	Ahctf1	Ahctf1	Protein ELYS	0.0192847	0.276641	1.46339
GO:0007049	cell cycle	Siah2	Siah2	E3 ubiquitin-protein ligase SIAH2	0.0192847	0.276641	1.46339
GO:0007049	cell cycle	Kif13a	Kif13a	Kinesin-like protein	0.0192847	0.276641	1.46339
GO:0007049	cell cycle	Cdc23	Cdc23	Cell division cycle protein 23 homolog	0.0192847	0.276641	1.46339
GO:0007049	cell cycle	Kif18b	Kif18b	Kinesin-like protein KIF18B	0.0192847	0.276641	1.46339
GO:0007049	cell cycle	Ncapd3	Ncapd3	Jacobsen syndrome region 2 protein	0.0192847	0.276641	1.46339
GO:0007049	cell cycle	D2Wsu81e	D2Wsu81e	Putative methyltransferase C9orf114 homolog	0.0192847	0.276641	1.46339
GO:0007049	cell cycle	Pard3b	Pard3b	Pard3b protein	0.0192847	0.276641	1.46339
GO:0007049	cell cycle	Prkce	Prkce	Protein kinase C epsilon type	0.0192847	0.276641	1.46339
GO:0007049	cell cycle	Setdb2	Setdb2	Histone-lysine N-methyltransferase SETDB2	0.0192847	0.276641	1.46339
GO:0007049	cell cycle	Anapc1	Anapc1	Anaphase-promoting complex subunit 1	0.0192847	0.276641	1.46339
GO:0007049	cell cycle	Brinp3	Brinp3	BMP/retinoic acid-inducible neural-specific protein 3	0.0192847	0.276641	1.46339
GO:0007049	cell cycle	Sycp2	Sycp2	Synaptonemal complex protein 2	0.0192847	0.276641	1.46339
GO:0007049	cell cycle	Nup37	Nup37	Nucleoporin Nup37	0.0192847	0.276641	1.46339
GO:0007049	cell cycle	Suv39h2	Suv39h2	Histone-lysine N-methyltransferase SUV39H2	0.0192847	0.276641	1.46339
GO:0007049	cell cycle	Zak	Zak	Mitogen-activated protein kinase kinase kinase MLT	0.0192847	0.276641	1.46339
GO:0007049	cell cycle	Pard3	Pard3	Par-3 (Partitioning defective 3) homolog (C. elegans)	0.0192847	0.276641	1.46339
GO:0021762	substantia nigra development	Mbp	Mbp	Myelin basic protein	0.019334	0.276641	3.19391
GO:0021762	substantia nigra development	Ina	Ina	Alpha-internexin	0.019334	0.276641	3.19391
GO:0021762	substantia nigra development	Cdc42	Cdc42	Cell division control protein 42 homolog	0.019334	0.276641	3.19391
GO:0021762	substantia nigra development	4930544G11Rik	4930544G11Rik	Testis specific expressed protein 5	0.019334	0.276641	3.19391
GO:0021762	substantia nigra development	Fgf9	Fgf9	Fibroblast growth factor 9	0.019334	0.276641	3.19391
GO:0032981	mitochondrial respiratory chain complex I assembly	Nubpl	Nubpl	Iron-sulfur protein NUBPL	0.0201004	0.276641	5.03041
GO:0032981	mitochondrial respiratory chain complex I assembly	Ndufaf6	Ndufaf6	NADH dehydrogenase (ubiquinone) complex I, assembly factor 6	0.0201004	0.276641	5.03041
GO:0032981	mitochondrial respiratory chain complex I assembly	Ndufs4	Ndufs4	NADH dehydrogenase [ubiquinone] iron-sulfur protein 4, mitochondrial	0.0201004	0.276641	5.03041
GO:0021846	cell proliferation in forebrain	Kif14	Kif14	Kinesin-like protein	0.0201004	0.276641	5.03041
GO:0021846	cell proliferation in forebrain	Disc1	Disc1	Disrupted in schizophrenia 1 homolog	0.0201004	0.276641	5.03041
GO:0021846	cell proliferation in forebrain	Six3	Six3	Homeobox protein SIX3	0.0201004	0.276641	5.03041
GO:1901379	regulation of potassium ion transmembrane transport	Cacna1d	Cacna1d	Cacna1d protein	0.0201004	0.276641	5.03041
GO:1901379	regulation of potassium ion transmembrane transport	Dpp10	Dpp10	Inactive dipeptidyl peptidase 10	0.0201004	0.276641	5.03041
GO:1901379	regulation of potassium ion transmembrane transport	Kcnip4	Kcnip4	Kv channel-interacting protein 4	0.0201004	0.276641	5.03041
GO:0060047	heart contraction	Cdc42	Cdc42	Cell division control protein 42 homolog	0.0201004	0.276641	5.03041
GO:0060047	heart contraction	Sgcz	Sgcz	Zeta-sarcoglycan	0.0201004	0.276641	5.03041
GO:0060047	heart contraction	Ace	Ace	Angiotensin-converting enzyme	0.0201004	0.276641	5.03041
GO:0006915	apoptotic process	Rad21	Rad21	RAD21 homolog (S. pombe)	0.0207736	0.276641	1.47464
GO:0006915	apoptotic process	Fbxo10	Fbxo10	F-box only protein 10	0.0207736	0.276641	1.47464
GO:0006915	apoptotic process	Mecom	Mecom	Evi1 protein	0.0207736	0.276641	1.47464
GO:0006915	apoptotic process	Ghitm	Ghitm	Growth hormone-inducible transmembrane protein	0.0207736	0.276641	1.47464
GO:0006915	apoptotic process	Opa1	Opa1	Dynamin-like 120 kDa protein, mitochondrial	0.0207736	0.276641	1.47464
GO:0006915	apoptotic process	Sema3a	Sema3a	Semaphorin-3A	0.0207736	0.276641	1.47464
GO:0006915	apoptotic process	Sulf1	Sulf1	Extracellular sulfatase Sulf-1	0.0207736	0.276641	1.47464
GO:0006915	apoptotic process	Sirt1	Sirt1	Sirt1 protein	0.0207736	0.276641	1.47464
GO:0006915	apoptotic process	Prkca	Prkca	Protein kinase C alpha type	0.0207736	0.276641	1.47464
GO:0006915	apoptotic process	Fhit	Fhit	Bis(5'-adenosyl)-triphosphatase	0.0207736	0.276641	1.47464
GO:0006915	apoptotic process	Ctnnbl1	Ctnnbl1	Putative uncharacterized protein	0.0207736	0.276641	1.47464
GO:0006915	apoptotic process	Xbp1	Xbp1	X-box-binding protein 1	0.0207736	0.276641	1.47464
GO:0006915	apoptotic process	Siah2	Siah2	E3 ubiquitin-protein ligase SIAH2	0.0207736	0.276641	1.47464
GO:0006915	apoptotic process	Akt2	Akt2	RAC-beta serine/threonine-protein kinase	0.0207736	0.276641	1.47464
GO:0006915	apoptotic process	Tnfrsf21	Tnfrsf21	Putative uncharacterized protein	0.0207736	0.276641	1.47464
GO:0006915	apoptotic process	Dram1	Dram1	DNA damage-regulated autophagy modulator protein 1	0.0207736	0.276641	1.47464
GO:0006915	apoptotic process	Aqp2	Aqp2	Aquaporin-2	0.0207736	0.276641	1.47464
GO:0006915	apoptotic process	Stk17b	Stk17b	Serine/threonine-protein kinase 17B	0.0207736	0.276641	1.47464
GO:0006915	apoptotic process	Wt1	Wt1	Wilms tumor protein homolog	0.0207736	0.276641	1.47464
GO:0006915	apoptotic process	Six1	Six1	Putative uncharacterized protein	0.0207736	0.276641	1.47464
GO:0006915	apoptotic process	Prkd1	Prkd1	Serine/threonine-protein kinase D1	0.0207736	0.276641	1.47464
GO:0006915	apoptotic process	Slk	Slk	Slk protein	0.0207736	0.276641	1.47464
GO:0006915	apoptotic process	Map3k7	Map3k7	Mitogen-activated protein kinase kinase kinase 7	0.0207736	0.276641	1.47464
GO:0006915	apoptotic process	Sgk1	Sgk1	Serine/threonine-protein kinase Sgk1	0.0207736	0.276641	1.47464
GO:0006915	apoptotic process	Tns4	Tns4	Tensin-4	0.0207736	0.276641	1.47464
GO:0006915	apoptotic process	Sh3glb1	Sh3glb1	Endophilin B1 testis variant	0.0207736	0.276641	1.47464
GO:0006915	apoptotic process	Dlc1	Dlc1	A730069N07Rik/deleted in liver cancer 1 fusion protein	0.0207736	0.276641	1.47464
GO:0006915	apoptotic process	Gzmb	Gzmb	Granzyme B(G,H)	0.0207736	0.276641	1.47464
GO:0006915	apoptotic process	Dock1	Dock1	Dedicator of cytokinesis protein 1	0.0207736	0.276641	1.47464
GO:0006915	apoptotic process	Arel1	Arel1	Apoptosis-resistant E3 ubiquitin protein ligase 1	0.0207736	0.276641	1.47464
GO:0006915	apoptotic process	Dnase1l3	Dnase1l3	Deoxyribonuclease gamma	0.0207736	0.276641	1.47464
GO:0022008	neurogenesis	Coq7	Coq7	Ubiquinone biosynthesis protein COQ7 homolog	0.021227	0.276641	3.11963
GO:0022008	neurogenesis	Cep120	Cep120	Centrosomal protein of 120 kDa	0.021227	0.276641	3.11963
GO:0022008	neurogenesis	Fat4	Fat4	Protocadherin Fat 4	0.021227	0.276641	3.11963
GO:0022008	neurogenesis	Six1	Six1	Putative uncharacterized protein	0.021227	0.276641	3.11963
GO:0022008	neurogenesis	Lhx2	Lhx2	LIM/homeobox protein Lhx2	0.021227	0.276641	3.11963
GO:0042060	wound healing	Nrg1	Nrg1	Type III neuregulin 1	0.0214667	0.276641	2.33294
GO:0042060	wound healing	Tgfb3	Tgfb3	Transforming growth factor beta-3	0.0214667	0.276641	2.33294
GO:0042060	wound healing	Dcn	Dcn	Decorin	0.0214667	0.276641	2.33294
GO:0042060	wound healing	Map3k1	Map3k1	Mitogen-activated protein kinase kinase kinase 1	0.0214667	0.276641	2.33294
GO:0042060	wound healing	Smad1	Smad1	Mothers against decapentaplegic homolog 1	0.0214667	0.276641	2.33294
GO:0042060	wound healing	Mia3	Mia3	Melanoma inhibitory activity protein 3	0.0214667	0.276641	2.33294
GO:0042060	wound healing	Oprm1	Oprm1	Mu opioid receptor mMOR-1R2	0.0214667	0.276641	2.33294
GO:0042060	wound healing	Igf2	Igf2	Insulin-like growth factor 2	0.0214667	0.276641	2.33294
GO:0007009	plasma membrane organization	Crb1	Crb1	Crb1 protein	0.023745	0.276641	4.7345
GO:0007009	plasma membrane organization	Fat4	Fat4	Protocadherin Fat 4	0.023745	0.276641	4.7345
GO:0007009	plasma membrane organization	Ank3	Ank3	Ankyrin-3	0.023745	0.276641	4.7345
GO:0032435	negative regulation of proteasomal ubiquitin-dependent protein catabolic process	Tlk2	Tlk2	Serine/threonine-protein kinase tousled-like 2	0.023745	0.276641	4.7345
GO:0032435	negative regulation of proteasomal ubiquitin-dependent protein catabolic process	Fhit	Fhit	Bis(5'-adenosyl)-triphosphatase	0.023745	0.276641	4.7345
GO:0032435	negative regulation of proteasomal ubiquitin-dependent protein catabolic process	Bag5	Bag5	BAG family molecular chaperone regulator 5	0.023745	0.276641	4.7345
GO:0051453	regulation of intracellular pH	Slc4a1	Slc4a1	Band 3 anion transport protein	0.023745	0.276641	4.7345
GO:0051453	regulation of intracellular pH	Slc4a10	Slc4a10	Sodium-driven chloride bicarbonate exchanger	0.023745	0.276641	4.7345
GO:0051453	regulation of intracellular pH	Slc4a4	Slc4a4	Slc4a4 protein	0.023745	0.276641	4.7345
GO:0015701	bicarbonate transport	Slc4a1	Slc4a1	Band 3 anion transport protein	0.023745	0.276641	4.7345
GO:0015701	bicarbonate transport	Slc4a10	Slc4a10	Sodium-driven chloride bicarbonate exchanger	0.023745	0.276641	4.7345
GO:0015701	bicarbonate transport	Slc4a4	Slc4a4	Slc4a4 protein	0.023745	0.276641	4.7345
GO:2000311	regulation of alpha-amino-3-hydroxy-5-methyl-4-isoxazole propionate selective glutamate receptor activity	Shank1	Shank1	SH3 and multiple ankyrin repeat domains protein 1	0.023745	0.276641	4.7345
GO:2000311	regulation of alpha-amino-3-hydroxy-5-methyl-4-isoxazole propionate selective glutamate receptor activity	Nlgn1	Nlgn1	Neuroligin-1	0.023745	0.276641	4.7345
GO:2000311	regulation of alpha-amino-3-hydroxy-5-methyl-4-isoxazole propionate selective glutamate receptor activity	Gsg1l	Gsg1l	Germ cell-specific gene 1-like protein	0.023745	0.276641	4.7345
GO:0018105	peptidyl-serine phosphorylation	Prkdc	Prkdc	DNA-dependent protein kinase catalytic subunit	0.0240834	0.276641	2.28331
GO:0018105	peptidyl-serine phosphorylation	Tlk2	Tlk2	Serine/threonine-protein kinase tousled-like 2	0.0240834	0.276641	2.28331
GO:0018105	peptidyl-serine phosphorylation	Hk1	Hk1	Hexokinase 1	0.0240834	0.276641	2.28331
GO:0018105	peptidyl-serine phosphorylation	Prkca	Prkca	Protein kinase C alpha type	0.0240834	0.276641	2.28331
GO:0018105	peptidyl-serine phosphorylation	Lmtk2	Lmtk2	Serine/threonine-protein kinase LMTK2	0.0240834	0.276641	2.28331
GO:0018105	peptidyl-serine phosphorylation	Prkce	Prkce	Protein kinase C epsilon type	0.0240834	0.276641	2.28331
GO:0018105	peptidyl-serine phosphorylation	Prkd1	Prkd1	Serine/threonine-protein kinase D1	0.0240834	0.276641	2.28331
GO:0018105	peptidyl-serine phosphorylation	Sgk1	Sgk1	Serine/threonine-protein kinase Sgk1	0.0240834	0.276641	2.28331
GO:0021983	pituitary gland development	Tcf7l2	Tcf7l2	Transcription factor 7-like 2	0.0243107	0.276641	3.57718
GO:0021983	pituitary gland development	Gli2	Gli2	GLI-Kruppel family member	0.0243107	0.276641	3.57718
GO:0021983	pituitary gland development	Kdm1a	Kdm1a	Lysine-specific histone demethylase 1A	0.0243107	0.276641	3.57718
GO:0021983	pituitary gland development	Six3	Six3	Homeobox protein SIX3	0.0243107	0.276641	3.57718
GO:0048663	neuron fate commitment	Nrg1	Nrg1	Type III neuregulin 1	0.0243107	0.276641	3.57718
GO:0048663	neuron fate commitment	Id2	Id2	DNA-binding protein inhibitor ID-2	0.0243107	0.276641	3.57718
GO:0048663	neuron fate commitment	Gbx1	Gbx1	Homeobox protein GBX-1	0.0243107	0.276641	3.57718
GO:0048663	neuron fate commitment	Olig1	Olig1	Putative uncharacterized protein	0.0243107	0.276641	3.57718
GO:0006364	rRNA processing	Nol6	Nol6	Putative uncharacterized protein	0.0254531	0.276641	2.13681
GO:0006364	rRNA processing	Rpl26	Rpl26	60S ribosomal protein L26	0.0254531	0.276641	2.13681
GO:0006364	rRNA processing	Cirh1a	Cirh1a	Putative uncharacterized protein	0.0254531	0.276641	2.13681
GO:0006364	rRNA processing	Sirt1	Sirt1	Sirt1 protein	0.0254531	0.276641	2.13681
GO:0006364	rRNA processing	Mphosph10	Mphosph10	Mphosph10 protein	0.0254531	0.276641	2.13681
GO:0006364	rRNA processing	Fcf1	Fcf1	rRNA-processing protein FCF1 homolog	0.0254531	0.276641	2.13681
GO:0006364	rRNA processing	Rrp9	Rrp9	U3 small nucleolar RNA-interacting protein 2	0.0254531	0.276641	2.13681
GO:0006364	rRNA processing	Mphosph6	Mphosph6	M-phase phosphoprotein 6	0.0254531	0.276641	2.13681
GO:0006364	rRNA processing	Utp18	Utp18	Putative uncharacterized protein	0.0254531	0.276641	2.13681
GO:0072112	glomerular visceral epithelial cell differentiation	Ptpro	Ptpro	Protein-tyrosine-phosphatase	0.0257242	0.276641	7.66539
GO:0072112	glomerular visceral epithelial cell differentiation	Wt1	Wt1	Wilms tumor protein homolog	0.0257242	0.276641	7.66539
GO:0060539	diaphragm development	Mnx1	Mnx1	Homeobox gene HB9	0.0257242	0.276641	7.66539
GO:0060539	diaphragm development	Wt1	Wt1	Wilms tumor protein homolog	0.0257242	0.276641	7.66539
GO:2000020	positive regulation of male gonad development	Sema3a	Sema3a	Semaphorin-3A	0.0257242	0.276641	7.66539
GO:2000020	positive regulation of male gonad development	Wt1	Wt1	Wilms tumor protein homolog	0.0257242	0.276641	7.66539
GO:0021942	radial glia guided migration of Purkinje cell	Rnf7	Rnf7	RING-box protein 2	0.0257242	0.276641	7.66539
GO:0021942	radial glia guided migration of Purkinje cell	Dab1	Dab1	Disabled homolog 1 (Drosophila), isoform CRA_a	0.0257242	0.276641	7.66539
GO:0021517	ventral spinal cord development	Gli2	Gli2	GLI-Kruppel family member	0.0257242	0.276641	7.66539
GO:0021517	ventral spinal cord development	Dab1	Dab1	Disabled homolog 1 (Drosophila), isoform CRA_a	0.0257242	0.276641	7.66539
GO:0021978	telencephalon regionalization	Lhx2	Lhx2	LIM/homeobox protein Lhx2	0.0257242	0.276641	7.66539
GO:0021978	telencephalon regionalization	Six3	Six3	Homeobox protein SIX3	0.0257242	0.276641	7.66539
GO:0002726	positive regulation of T cell cytokine production	Map3k7	Map3k7	Mitogen-activated protein kinase kinase kinase 7	0.0257242	0.276641	7.66539
GO:0002726	positive regulation of T cell cytokine production	Tnfsf4	Tnfsf4	Tumor necrosis factor (Ligand) superfamily member 4	0.0257242	0.276641	7.66539
GO:0046069	cGMP catabolic process	Pde1a	Pde1a	Calcium/calmodulin-dependent 3',5'-cyclic nucleotide phosphodiesterase 1A	0.0257242	0.276641	7.66539
GO:0046069	cGMP catabolic process	Pde11a	Pde11a	Dual 3',5'-cyclic-AMP and -GMP phosphodiesterase 11A	0.0257242	0.276641	7.66539
GO:0014031	mesenchymal cell development	Hey2	Hey2	Hairy/enhancer-of-split related with YRPW motif 2	0.0257242	0.276641	7.66539
GO:0014031	mesenchymal cell development	Hey1	Hey1	Putative uncharacterized protein	0.0257242	0.276641	7.66539
GO:0010960	magnesium ion homeostasis	Cnnm2	Cnnm2	Cyclin-like protein 2	0.0257242	0.276641	7.66539
GO:0010960	magnesium ion homeostasis	Ank3	Ank3	Ankyrin-3	0.0257242	0.276641	7.66539
GO:0001955	blood vessel maturation	Reck	Reck	Reck protein	0.0257242	0.276641	7.66539
GO:0001955	blood vessel maturation	Cdh5	Cdh5	Cadherin-5	0.0257242	0.276641	7.66539
GO:0003300	cardiac muscle hypertrophy	Hey2	Hey2	Hairy/enhancer-of-split related with YRPW motif 2	0.0257242	0.276641	7.66539
GO:0003300	cardiac muscle hypertrophy	Ttn	Ttn	Titin	0.0257242	0.276641	7.66539
GO:0072075	metanephric mesenchyme development	Wt1	Wt1	Wilms tumor protein homolog	0.0257242	0.276641	7.66539
GO:0072075	metanephric mesenchyme development	Six1	Six1	Putative uncharacterized protein	0.0257242	0.276641	7.66539
GO:0009629	response to gravity	Fos	Fos	Proto-oncogene c-Fos	0.0257242	0.276641	7.66539
GO:0009629	response to gravity	Nox3	Nox3	NADPH oxidase 3	0.0257242	0.276641	7.66539
GO:0043497	regulation of protein heterodimerization activity	Nrg1	Nrg1	Type III neuregulin 1	0.0257242	0.276641	7.66539
GO:0043497	regulation of protein heterodimerization activity	Cdc42	Cdc42	Cell division control protein 42 homolog	0.0257242	0.276641	7.66539
GO:0032570	response to progesterone	Mbp	Mbp	Myelin basic protein	0.0271129	0.276641	3.46179
GO:0032570	response to progesterone	Tgfb3	Tgfb3	Transforming growth factor beta-3	0.0271129	0.276641	3.46179
GO:0032570	response to progesterone	Fos	Fos	Proto-oncogene c-Fos	0.0271129	0.276641	3.46179
GO:0032570	response to progesterone	Tyms	Tyms	Thymidylate synthase, isoform CRA_b	0.0271129	0.276641	3.46179
GO:0007162	negative regulation of cell adhesion	Tnr	Tnr	Tenascin-R	0.0271129	0.276641	3.46179
GO:0007162	negative regulation of cell adhesion	Dact2	Dact2	Dapper homolog 2	0.0271129	0.276641	3.46179
GO:0007162	negative regulation of cell adhesion	Mia3	Mia3	Melanoma inhibitory activity protein 3	0.0271129	0.276641	3.46179
GO:0007162	negative regulation of cell adhesion	Dab1	Dab1	Disabled homolog 1 (Drosophila), isoform CRA_a	0.0271129	0.276641	3.46179
GO:0006820	anion transport	Slc4a1	Slc4a1	Band 3 anion transport protein	0.0271129	0.276641	3.46179
GO:0006820	anion transport	Slc26a4	Slc26a4	Solute carrier family 26, member 4	0.0271129	0.276641	3.46179
GO:0006820	anion transport	Slc4a10	Slc4a10	Sodium-driven chloride bicarbonate exchanger	0.0271129	0.276641	3.46179
GO:0006820	anion transport	Slc4a4	Slc4a4	Slc4a4 protein	0.0271129	0.276641	3.46179
GO:0045184	establishment of protein localization	Cript	Cript	Cysteine-rich PDZ-binding protein	0.0271129	0.276641	3.46179
GO:0045184	establishment of protein localization	Nlgn1	Nlgn1	Neuroligin-1	0.0271129	0.276641	3.46179
GO:0045184	establishment of protein localization	Kif14	Kif14	Kinesin-like protein	0.0271129	0.276641	3.46179
GO:0045184	establishment of protein localization	Ank3	Ank3	Ankyrin-3	0.0271129	0.276641	3.46179
GO:0046854	phosphatidylinositol phosphorylation	Pik3c3	Pik3c3	Phosphatidylinositol 3-kinase catalytic subunit type 3	0.0271129	0.276641	3.46179
GO:0046854	phosphatidylinositol phosphorylation	Pik3c2g	Pik3c2g	Phosphatidylinositol 4-phosphate 3-kinase C2 domain-containing subunit gamma	0.0271129	0.276641	3.46179
GO:0046854	phosphatidylinositol phosphorylation	Pi4ka	Pi4ka	Protein Pi4ka	0.0271129	0.276641	3.46179
GO:0046854	phosphatidylinositol phosphorylation	Pik3cg	Pik3cg	Phosphoinositide-3-kinase gamma polypeptide	0.0271129	0.276641	3.46179
GO:0042325	regulation of phosphorylation	Rptor	Rptor	Regulatory-associated protein of mTOR	0.027722	0.276641	4.47148
GO:0042325	regulation of phosphorylation	Akap11	Akap11	Protein Akap11	0.027722	0.276641	4.47148
GO:0042325	regulation of phosphorylation	Phactr1	Phactr1	Phosphatase and actin regulator 1	0.027722	0.276641	4.47148
GO:0061024	membrane organization	Mbp	Mbp	Myelin basic protein	0.027722	0.276641	4.47148
GO:0061024	membrane organization	Sgcz	Sgcz	Zeta-sarcoglycan	0.027722	0.276641	4.47148
GO:0061024	membrane organization	Crb1	Crb1	Crb1 protein	0.027722	0.276641	4.47148
GO:0090314	positive regulation of protein targeting to membrane	Cemip	Cemip	Uncharacterized protein	0.027722	0.276641	4.47148
GO:0090314	positive regulation of protein targeting to membrane	Akt2	Akt2	RAC-beta serine/threonine-protein kinase	0.027722	0.276641	4.47148
GO:0090314	positive regulation of protein targeting to membrane	Ank3	Ank3	Ankyrin-3	0.027722	0.276641	4.47148
GO:0060384	innervation	Sulf1	Sulf1	Extracellular sulfatase Sulf-1	0.027722	0.276641	4.47148
GO:0060384	innervation	Slitrk6	Slitrk6	SLIT and NTRK-like family, member 6	0.027722	0.276641	4.47148
GO:0060384	innervation	Gabrb2	Gabrb2	Gamma-aminobutyric acid receptor subunit beta-2	0.027722	0.276641	4.47148
GO:0045666	positive regulation of neuron differentiation	4930544G11Rik	4930544G11Rik	Testis specific expressed protein 5	0.0284155	0.276641	2.21269
GO:0045666	positive regulation of neuron differentiation	Tcf4	Tcf4	Transcription factor 4	0.0284155	0.276641	2.21269
GO:0045666	positive regulation of neuron differentiation	Vwc2l	Vwc2l	von Willebrand factor C domain-containing protein 2-like	0.0284155	0.276641	2.21269
GO:0045666	positive regulation of neuron differentiation	Etv5	Etv5	ETS translocation variant 5	0.0284155	0.276641	2.21269
GO:0045666	positive regulation of neuron differentiation	Gli2	Gli2	GLI-Kruppel family member	0.0284155	0.276641	2.21269
GO:0045666	positive regulation of neuron differentiation	Brinp3	Brinp3	BMP/retinoic acid-inducible neural-specific protein 3	0.0284155	0.276641	2.21269
GO:0045666	positive regulation of neuron differentiation	Fez1	Fez1	Fasciculation and elongation protein zeta-1	0.0284155	0.276641	2.21269
GO:0045666	positive regulation of neuron differentiation	Dab1	Dab1	Disabled homolog 1 (Drosophila), isoform CRA_a	0.0284155	0.276641	2.21269
GO:0035264	multicellular organism growth	Tcf7l2	Tcf7l2	Transcription factor 7-like 2	0.0299717	0.276641	2.19011
GO:0035264	multicellular organism growth	Ercc6	Ercc6	Ercc6 protein	0.0299717	0.276641	2.19011
GO:0035264	multicellular organism growth	Cdc42	Cdc42	Cell division control protein 42 homolog	0.0299717	0.276641	2.19011
GO:0035264	multicellular organism growth	Pde4d	Pde4d	Phosphodiesterase 4D, cAMP specific	0.0299717	0.276641	2.19011
GO:0035264	multicellular organism growth	Slc4a10	Slc4a10	Sodium-driven chloride bicarbonate exchanger	0.0299717	0.276641	2.19011
GO:0035264	multicellular organism growth	Ercc5	Ercc5	Excision repair cross-complementing rodent repair deficiency, complementation group 5	0.0299717	0.276641	2.19011
GO:0035264	multicellular organism growth	Slitrk6	Slitrk6	SLIT and NTRK-like family, member 6	0.0299717	0.276641	2.19011
GO:0035264	multicellular organism growth	Pcdh15	Pcdh15	Protocadherin-15	0.0299717	0.276641	2.19011
GO:0050808	synapse organization	Sema3e	Sema3e	Semaphorin-3E	0.0301001	0.276641	3.35361
GO:0050808	synapse organization	Tnr	Tnr	Tenascin-R	0.0301001	0.276641	3.35361
GO:0050808	synapse organization	Nlgn1	Nlgn1	Neuroligin-1	0.0301001	0.276641	3.35361
GO:0050808	synapse organization	Ank3	Ank3	Ankyrin-3	0.0301001	0.276641	3.35361
GO:0030032	lamellipodium assembly	Wasf2	Wasf2	Wiskott-Aldrich syndrome protein family member 2	0.0301001	0.276641	3.35361
GO:0030032	lamellipodium assembly	Ptpro	Ptpro	Protein-tyrosine-phosphatase	0.0301001	0.276641	3.35361
GO:0030032	lamellipodium assembly	Spata13	Spata13	Spata13 protein	0.0301001	0.276641	3.35361
GO:0030032	lamellipodium assembly	Ablim1	Ablim1	Ablim1 protein	0.0301001	0.276641	3.35361
GO:0061178	regulation of insulin secretion involved in cellular response to glucose stimulus	Tcf7l2	Tcf7l2	Transcription factor 7-like 2	0.0320298	0.276641	4.23613
GO:0061178	regulation of insulin secretion involved in cellular response to glucose stimulus	Epha5	Epha5	Receptor protein-tyrosine kinase	0.0320298	0.276641	4.23613
GO:0061178	regulation of insulin secretion involved in cellular response to glucose stimulus	Prkce	Prkce	Protein kinase C epsilon type	0.0320298	0.276641	4.23613
GO:0005978	glycogen biosynthetic process	Akt2	Akt2	RAC-beta serine/threonine-protein kinase	0.0320298	0.276641	4.23613
GO:0005978	glycogen biosynthetic process	Pgm5	Pgm5	Pgm5 protein	0.0320298	0.276641	4.23613
GO:0005978	glycogen biosynthetic process	Pgm2	Pgm1	Phosphoglucomutase-2	0.0320298	0.276641	4.23613
GO:0048278	vesicle docking	Cep83	Cep83	Putative uncharacterized protein	0.0320298	0.276641	4.23613
GO:0048278	vesicle docking	Syt1	Syt1	Synaptotagmin-1	0.0320298	0.276641	4.23613
GO:0048278	vesicle docking	Stx17	Stx17	Syntaxin-17	0.0320298	0.276641	4.23613
GO:0090102	cochlea development	Hey2	Hey2	Hairy/enhancer-of-split related with YRPW motif 2	0.0320298	0.276641	4.23613
GO:0090102	cochlea development	Slitrk6	Slitrk6	SLIT and NTRK-like family, member 6	0.0320298	0.276641	4.23613
GO:0090102	cochlea development	Gabrb2	Gabrb2	Gamma-aminobutyric acid receptor subunit beta-2	0.0320298	0.276641	4.23613
GO:0050919	negative chemotaxis	Itgav	Itgav	Integrin alpha-V	0.0320298	0.276641	4.23613
GO:0050919	negative chemotaxis	Sema3a	Sema3a	Semaphorin-3A	0.0320298	0.276641	4.23613
GO:0050919	negative chemotaxis	4930544G11Rik	4930544G11Rik	Testis specific expressed protein 5	0.0320298	0.276641	4.23613
GO:0016049	cell growth	Itgav	Itgav	Integrin alpha-V	0.032484	0.276641	2.79467
GO:0016049	cell growth	Tgfb3	Tgfb3	Transforming growth factor beta-3	0.032484	0.276641	2.79467
GO:0016049	cell growth	Rasgrp4	Rasgrp4	RAS guanyl-releasing protein 4	0.032484	0.276641	2.79467
GO:0016049	cell growth	Xbp1	Xbp1	X-box-binding protein 1	0.032484	0.276641	2.79467
GO:0016049	cell growth	Rptor	Rptor	Regulatory-associated protein of mTOR	0.032484	0.276641	2.79467
GO:0006367	transcription initiation from RNA polymerase II promoter	Gtf2e2	Gtf2e2	General transcription factor IIE subunit 2	0.0332738	0.276641	3.25198
GO:0006367	transcription initiation from RNA polymerase II promoter	Gtf2a1l	Gtf2a1l	TFIIA-alpha and beta-like factor	0.0332738	0.276641	3.25198
GO:0006367	transcription initiation from RNA polymerase II promoter	Tcf4	Tcf4	Transcription factor 4	0.0332738	0.276641	3.25198
GO:0006367	transcription initiation from RNA polymerase II promoter	Gtf2a1	Gtf2a1	Gtf2a1 protein	0.0332738	0.276641	3.25198
GO:0030705	cytoskeleton-dependent intracellular transport	Kif14	Kif14	Kinesin-like protein	0.0334622	0.276641	6.70721
GO:0030705	cytoskeleton-dependent intracellular transport	Myo10	Myo10	Unconventional myosin-X	0.0334622	0.276641	6.70721
GO:0003184	pulmonary valve morphogenesis	Hey2	Hey2	Hairy/enhancer-of-split related with YRPW motif 2	0.0334622	0.276641	6.70721
GO:0003184	pulmonary valve morphogenesis	Hey1	Hey1	Putative uncharacterized protein	0.0334622	0.276641	6.70721
GO:1901642	nucleoside transmembrane transport	Slc29a3	Slc29a3	Equilibrative nucleoside transporter 3	0.0334622	0.276641	6.70721
GO:1901642	nucleoside transmembrane transport	Slc29a2	Slc29a2	Equilibrative nucleoside transporter 2	0.0334622	0.276641	6.70721
GO:0045348	positive regulation of MHC class II biosynthetic process	Sirt1	Sirt1	Sirt1 protein	0.0334622	0.276641	6.70721
GO:0045348	positive regulation of MHC class II biosynthetic process	Xbp1	Xbp1	X-box-binding protein 1	0.0334622	0.276641	6.70721
GO:0003208	cardiac ventricle morphogenesis	Hey2	Hey2	Hairy/enhancer-of-split related with YRPW motif 2	0.0334622	0.276641	6.70721
GO:0003208	cardiac ventricle morphogenesis	Hey1	Hey1	Putative uncharacterized protein	0.0334622	0.276641	6.70721
GO:2000009	negative regulation of protein localization to cell surface	Actn2	Actn2	Alpha-actinin-2	0.0334622	0.276641	6.70721
GO:2000009	negative regulation of protein localization to cell surface	Leprot	Leprot	Leptin receptor gene-related protein	0.0334622	0.276641	6.70721
GO:0051292	nuclear pore complex assembly	Nup107	Nup107	Nuclear pore complex protein Nup107	0.0334622	0.276641	6.70721
GO:0051292	nuclear pore complex assembly	Ahctf1	Ahctf1	Protein ELYS	0.0334622	0.276641	6.70721
GO:0007158	neuron cell-cell adhesion	Tnr	Tnr	Tenascin-R	0.0334622	0.276641	6.70721
GO:0007158	neuron cell-cell adhesion	Nlgn1	Nlgn1	Neuroligin-1	0.0334622	0.276641	6.70721
GO:0050863	regulation of T cell activation	Cd4	Cd4	T4 surface glycoprotein	0.0334622	0.276641	6.70721
GO:0050863	regulation of T cell activation	Csk	Csk	Tyrosine-protein kinase CSK	0.0334622	0.276641	6.70721
GO:0002070	epithelial cell maturation	Xbp1	Xbp1	X-box-binding protein 1	0.0334622	0.276641	6.70721
GO:0002070	epithelial cell maturation	Six3	Six3	Homeobox protein SIX3	0.0334622	0.276641	6.70721
GO:0090557	establishment of endothelial intestinal barrier	Tjp2	Tjp2	Tight junction protein ZO-2	0.0334622	0.276641	6.70721
GO:0090557	establishment of endothelial intestinal barrier	Tjp1	Tjp1	Tjp1 protein	0.0334622	0.276641	6.70721
GO:0031340	positive regulation of vesicle fusion	Syt1	Syt1	Synaptotagmin-1	0.0334622	0.276641	6.70721
GO:0031340	positive regulation of vesicle fusion	Akt2	Akt2	RAC-beta serine/threonine-protein kinase	0.0334622	0.276641	6.70721
GO:0048660	regulation of smooth muscle cell proliferation	Tcf7l2	Tcf7l2	Transcription factor 7-like 2	0.0334622	0.276641	6.70721
GO:0048660	regulation of smooth muscle cell proliferation	Pde1a	Pde1a	Calcium/calmodulin-dependent 3',5'-cyclic nucleotide phosphodiesterase 1A	0.0334622	0.276641	6.70721
GO:0071420	cellular response to histamine	Hrh1	Hrh1	Histamine H1 receptor	0.0334622	0.276641	6.70721
GO:0071420	cellular response to histamine	Gabrb2	Gabrb2	Gamma-aminobutyric acid receptor subunit beta-2	0.0334622	0.276641	6.70721
GO:0006972	hyperosmotic response	Hnmt	Hnmt	Histamine N-methyltransferase	0.0334622	0.276641	6.70721
GO:0006972	hyperosmotic response	Aqp2	Aqp2	Aquaporin-2	0.0334622	0.276641	6.70721
GO:0061314	Notch signaling involved in heart development	Hey2	Hey2	Hairy/enhancer-of-split related with YRPW motif 2	0.0334622	0.276641	6.70721
GO:0061314	Notch signaling involved in heart development	Hey1	Hey1	Putative uncharacterized protein	0.0334622	0.276641	6.70721
GO:0032816	positive regulation of natural killer cell activation	Il12b	Il12b	Interleukin-12 subunit beta	0.0334622	0.276641	6.70721
GO:0032816	positive regulation of natural killer cell activation	Hps1	Hps1	Hermansky-Pudlak syndrome 1 protein homolog	0.0334622	0.276641	6.70721
GO:0051567	histone H3-K9 methylation	Setdb2	Setdb2	Histone-lysine N-methyltransferase SETDB2	0.0334622	0.276641	6.70721
GO:0051567	histone H3-K9 methylation	Suv39h2	Suv39h2	Histone-lysine N-methyltransferase SUV39H2	0.0334622	0.276641	6.70721
GO:0072015	glomerular visceral epithelial cell development	Wt1	Wt1	Wilms tumor protein homolog	0.0334622	0.276641	6.70721
GO:0072015	glomerular visceral epithelial cell development	Magi2	Magi2	Putative uncharacterized protein	0.0334622	0.276641	6.70721
GO:0060411	cardiac septum morphogenesis	Hey2	Hey2	Hairy/enhancer-of-split related with YRPW motif 2	0.0334622	0.276641	6.70721
GO:0060411	cardiac septum morphogenesis	Hey1	Hey1	Putative uncharacterized protein	0.0334622	0.276641	6.70721
GO:0048739	cardiac muscle fiber development	Myo18b	Myo18b	Myo18b protein	0.0334622	0.276641	6.70721
GO:0048739	cardiac muscle fiber development	Ttn	Ttn	Titin	0.0334622	0.276641	6.70721
GO:0045165	cell fate commitment	Sox12	Sox12	Transcription factor SOX-12	0.0338403	0.276641	2.47651
GO:0045165	cell fate commitment	Hey2	Hey2	Hairy/enhancer-of-split related with YRPW motif 2	0.0338403	0.276641	2.47651
GO:0045165	cell fate commitment	Sox6	Sox6	Transcription factor SOX-6	0.0338403	0.276641	2.47651
GO:0045165	cell fate commitment	Barhl2	Barhl2	Barhl2 protein	0.0338403	0.276641	2.47651
GO:0045165	cell fate commitment	Spry2	Spry2	Sprouty homolog 2 (Drosophila)	0.0338403	0.276641	2.47651
GO:0045165	cell fate commitment	Mitf	Mitf	Microphthalmia-associated transcription factor B isoform	0.0338403	0.276641	2.47651
GO:0009267	cellular response to starvation	Tcf7l2	Tcf7l2	Transcription factor 7-like 2	0.0351066	0.276641	2.73764
GO:0009267	cellular response to starvation	Sirt1	Sirt1	Sirt1 protein	0.0351066	0.276641	2.73764
GO:0009267	cellular response to starvation	Cartpt	Cartpt	Cocaine- and amphetamine-regulated transcript protein	0.0351066	0.276641	2.73764
GO:0009267	cellular response to starvation	Fbxo22	Fbxo22	F-box only protein 22, isoform CRA_a	0.0351066	0.276641	2.73764
GO:0009267	cellular response to starvation	Eif2ak4	Eif2ak4	Eukaryotic translation initiation factor 2-alpha kinase 4	0.0351066	0.276641	2.73764
GO:0045665	negative regulation of neuron differentiation	Zfp536	Zfp536	Zinc finger protein 536	0.0360978	0.276641	2.43899
GO:0045665	negative regulation of neuron differentiation	Id2	Id2	DNA-binding protein inhibitor ID-2	0.0360978	0.276641	2.43899
GO:0045665	negative regulation of neuron differentiation	Rest	Rest	REST4	0.0360978	0.276641	2.43899
GO:0045665	negative regulation of neuron differentiation	Hey1	Hey1	Putative uncharacterized protein	0.0360978	0.276641	2.43899
GO:0045665	negative regulation of neuron differentiation	Meis1	Meis1	Homeobox protein Meis1	0.0360978	0.276641	2.43899
GO:0045665	negative regulation of neuron differentiation	Six3	Six3	Homeobox protein SIX3	0.0360978	0.276641	2.43899
GO:0048589	developmental growth	Chst11	Chst11	Uncharacterized protein	0.0366353	0.276641	3.15634
GO:0048589	developmental growth	Nipbl	Nipbl	Nipbl protein	0.0366353	0.276641	3.15634
GO:0048589	developmental growth	Gli2	Gli2	GLI-Kruppel family member	0.0366353	0.276641	3.15634
GO:0048589	developmental growth	Tyms	Tyms	Thymidylate synthase, isoform CRA_b	0.0366353	0.276641	3.15634
GO:0032320	positive regulation of Ras GTPase activity	Rasal1	Rasal1	RasGAP-activating-like protein 1	0.0366353	0.276641	3.15634
GO:0032320	positive regulation of Ras GTPase activity	Rasgrp4	Rasgrp4	RAS guanyl-releasing protein 4	0.0366353	0.276641	3.15634
GO:0032320	positive regulation of Ras GTPase activity	Rasgrp3	Rasgrp3	RasGRP3	0.0366353	0.276641	3.15634
GO:0032320	positive regulation of Ras GTPase activity	Rapgef4	Rapgef4	Rapgef4 protein	0.0366353	0.276641	3.15634
GO:0007163	establishment or maintenance of cell polarity	Snap91	Snap91	Clathrin coat assembly protein AP180	0.0366654	0.276641	4.02433
GO:0007163	establishment or maintenance of cell polarity	Cdc42	Cdc42	Cell division control protein 42 homolog	0.0366654	0.276641	4.02433
GO:0007163	establishment or maintenance of cell polarity	Pard3	Pard3	Par-3 (Partitioning defective 3) homolog (C. elegans)	0.0366654	0.276641	4.02433
GO:0097402	neuroblast migration	Six3	Six3	Homeobox protein SIX3	0.0372733	0.276641	26.8289
GO:0051654	establishment of mitochondrion localization	Fez1	Fez1	Fasciculation and elongation protein zeta-1	0.0372733	0.276641	26.8289
GO:0098746	fast, calcium ion-dependent exocytosis of neurotransmitter	Syt1	Syt1	Synaptotagmin-1	0.0372733	0.276641	26.8289
GO:0060143	positive regulation of syncytium formation by plasma membrane fusion	Gcm1	Gcm1	Chorion-specific transcription factor GCMa	0.0372733	0.276641	26.8289
GO:1903429	regulation of cell maturation	Kif14	Kif14	Kinesin-like protein	0.0372733	0.276641	26.8289
GO:1903427	negative regulation of reactive oxygen species biosynthetic process	Sirt1	Sirt1	Sirt1 protein	0.0372733	0.276641	26.8289
GO:0002699	positive regulation of immune effector process	Tnfsf4	Tnfsf4	Tumor necrosis factor (Ligand) superfamily member 4	0.0372733	0.276641	26.8289
GO:0071691	cardiac muscle thin filament assembly	Nebl	Nebl	LIM zinc-binding domain-containing Nebulette	0.0372733	0.276641	26.8289
GO:0044089	positive regulation of cellular component biogenesis	Ldb2	Ldb2	LIM domain-binding protein 2	0.0372733	0.276641	26.8289
GO:0070367	negative regulation of hepatocyte differentiation	Frzb	Frzb	Secreted frizzled-related protein 3	0.0372733	0.276641	26.8289
GO:2000170	positive regulation of peptidyl-cysteine S-nitrosylation	Ace	Ace	Angiotensin-converting enzyme	0.0372733	0.276641	26.8289
GO:1902519	response to docetaxel trihydrate	Kif14	Kif14	Kinesin-like protein	0.0372733	0.276641	26.8289
GO:2001031	positive regulation of cellular glucuronidation	Prkce	Prkce	Protein kinase C epsilon type	0.0372733	0.276641	26.8289
GO:0036031	recruitment of mRNA capping enzyme to RNA polymerase II holoenzyme complex	Fam103a1	Fam103a1	RNMT-activating mini protein	0.0372733	0.276641	26.8289
GO:0000080	mitotic G1 phase	Sycp2	Sycp2	Synaptonemal complex protein 2	0.0372733	0.276641	26.8289
GO:0036022	limb joint morphogenesis	Sulf1	Sulf1	Extracellular sulfatase Sulf-1	0.0372733	0.276641	26.8289
GO:1903489	positive regulation of lactation	Xbp1	Xbp1	X-box-binding protein 1	0.0372733	0.276641	26.8289
GO:0006679	glucosylceramide biosynthetic process	Ugcg	Ugcg	Ceramide glucosyltransferase	0.0372733	0.276641	26.8289
GO:1902165	regulation of intrinsic apoptotic signaling pathway in response to DNA damage by p53 class mediator	Hnrnpk	Hnrnpk	Heterogeneous nuclear ribonucleoprotein K	0.0372733	0.276641	26.8289
GO:0003186	tricuspid valve morphogenesis	Hey2	Hey2	Hairy/enhancer-of-split related with YRPW motif 2	0.0372733	0.276641	26.8289
GO:0052106	quorum sensing involved in interaction with host	Slc22a5	Slc22a5	Solute carrier family 22 member 5	0.0372733	0.276641	26.8289
GO:2001076	positive regulation of metanephric ureteric bud development	Wt1	Wt1	Wilms tumor protein homolog	0.0372733	0.276641	26.8289
GO:0021813	cell-cell adhesion involved in neuronal-glial interactions involved in cerebral cortex radial glia guided migration	Dab1	Dab1	Disabled homolog 1 (Drosophila), isoform CRA_a	0.0372733	0.276641	26.8289
GO:0006660	phosphatidylserine catabolic process	Abhd12	Abhd12	Monoacylglycerol lipase ABHD12	0.0372733	0.276641	26.8289
GO:0036060	slit diaphragm assembly	Ptpro	Ptpro	Protein-tyrosine-phosphatase	0.0372733	0.276641	26.8289
GO:0048050	post-embryonic eye morphogenesis	Bhlhe23	Bhlhe23	Basic helix-loop-helix domain containing, class B4	0.0372733	0.276641	26.8289
GO:0031651	negative regulation of heat generation	Arrdc3	Arrdc3	Arrestin domain-containing protein 3	0.0372733	0.276641	26.8289
GO:0032980	keratinocyte activation	Krt2	Krt2	Krt2 protein	0.0372733	0.276641	26.8289
GO:0006231	dTMP biosynthetic process	Tyms	Tyms	Thymidylate synthase, isoform CRA_b	0.0372733	0.276641	26.8289
GO:0010725	regulation of primitive erythrocyte differentiation	Kdm1a	Kdm1a	Lysine-specific histone demethylase 1A	0.0372733	0.276641	26.8289
GO:0010650	positive regulation of cell communication by electrical coupling	Ank3	Ank3	Ankyrin-3	0.0372733	0.276641	26.8289
GO:0070715	sodium-dependent organic cation transport	Slc22a5	Slc22a5	Solute carrier family 22 member 5	0.0372733	0.276641	26.8289
GO:0031591	wybutosine biosynthetic process	Tyw5	Tyw5	tRNA wybutosine-synthesizing protein 5	0.0372733	0.276641	26.8289
GO:0043114	regulation of vascular permeability	Hrh1	Hrh1	Histamine H1 receptor	0.0372733	0.276641	26.8289
GO:0032430	positive regulation of phospholipase A2 activity	Agtr1a	Agtr1a	Type-1A angiotensin II receptor	0.0372733	0.276641	26.8289
GO:0006147	guanine catabolic process	Gda	Gda	Guanine deaminase	0.0372733	0.276641	26.8289
GO:0090327	negative regulation of locomotion involved in locomotory behavior	Arrdc3	Arrdc3	Arrestin domain-containing protein 3	0.0372733	0.276641	26.8289
GO:1902073	positive regulation of hypoxia-inducible factor-1alpha signaling pathway	Rwdd3	Rwdd3	Rwdd3 protein	0.0372733	0.276641	26.8289
GO:0032011	ARF protein signal transduction	Psd3	Psd3	PH and SEC7 domain-containing protein 3	0.0372733	0.276641	26.8289
GO:0015918	sterol transport	Abcg8	Abcg8	ATP-binding cassette sub-family G member 8	0.0372733	0.276641	26.8289
GO:2000614	positive regulation of thyroid-stimulating hormone secretion	Sirt1	Sirt1	Sirt1 protein	0.0372733	0.276641	26.8289
GO:0019088	immortalization of host cell by virus	Tyms	Tyms	Thymidylate synthase, isoform CRA_b	0.0372733	0.276641	26.8289
GO:2000655	negative regulation of cellular response to testosterone stimulus	Sirt1	Sirt1	Sirt1 protein	0.0372733	0.276641	26.8289
GO:2000666	negative regulation of interleukin-13 secretion	Tnfrsf21	Tnfrsf21	Putative uncharacterized protein	0.0372733	0.276641	26.8289
GO:2000663	negative regulation of interleukin-5 secretion	Tnfrsf21	Tnfrsf21	Putative uncharacterized protein	0.0372733	0.276641	26.8289
GO:0015964	diadenosine triphosphate catabolic process	Fhit	Fhit	Bis(5'-adenosyl)-triphosphatase	0.0372733	0.276641	26.8289
GO:0050433	regulation of catecholamine secretion	Sdhd	Sdhd	Succinate dehydrogenase [ubiquinone] cytochrome b small subunit, mitochondrial	0.0372733	0.276641	26.8289
GO:1903305	regulation of regulated secretory pathway	Syt1	Syt1	Synaptotagmin-1	0.0372733	0.276641	26.8289
GO:0051309	female meiosis chromosome separation	Sycp3	Sycp3	Synaptonemal complex protein 3	0.0372733	0.276641	26.8289
GO:1900281	positive regulation of CD4-positive, alpha-beta T cell costimulation	Tnfsf4	Tnfsf4	Tumor necrosis factor (Ligand) superfamily member 4	0.0372733	0.276641	26.8289
GO:0002347	response to tumor cell	Hnmt	Hnmt	Histamine N-methyltransferase	0.0372733	0.276641	26.8289
GO:0045058	T cell selection	Cd4	Cd4	T4 surface glycoprotein	0.0372733	0.276641	26.8289
GO:1902891	negative regulation of root hair elongation	Gal	Gal	Galanin peptides	0.0372733	0.276641	26.8289
GO:1902897	regulation of postsynaptic density protein 95 clustering	Cript	Cript	Cysteine-rich PDZ-binding protein	0.0372733	0.276641	26.8289
GO:0050894	determination of affect	Shank1	Shank1	SH3 and multiple ankyrin repeat domains protein 1	0.0372733	0.276641	26.8289
GO:0060691	epithelial cell maturation involved in salivary gland development	Xbp1	Xbp1	X-box-binding protein 1	0.0372733	0.276641	26.8289
GO:0051389	inactivation of MAPKK activity	Igf1r	Igf1r	Tyrosine-protein kinase receptor	0.0372733	0.276641	26.8289
GO:0097111	endoplasmic reticulum-Golgi intermediate compartment organization	Stx17	Stx17	Syntaxin-17	0.0372733	0.276641	26.8289
GO:0097115	neurexin clustering	Nlgn1	Nlgn1	Neuroligin-1	0.0372733	0.276641	26.8289
GO:0021993	initiation of neural tube closure	Kdm2b	Kdm2b	Lysine-specific demethylase 2B	0.0372733	0.276641	26.8289
GO:0006343	establishment of chromatin silencing	Sirt1	Sirt1	Sirt1 protein	0.0372733	0.276641	26.8289
GO:1902023	L-arginine transport	Slc7a2	Slc7a2	Cationic amino acid transporter 2A	0.0372733	0.276641	26.8289
GO:0070838	divalent metal ion transport	Cacna1d	Cacna1d	Cacna1d protein	0.0372733	0.276641	26.8289
GO:0032532	regulation of microvillus length	Twf2	Twf2	Twinfilin-2	0.0372733	0.276641	26.8289
GO:0016068	type I hypersensitivity	Snap91	Snap91	Clathrin coat assembly protein AP180	0.0372733	0.276641	26.8289
GO:0060648	mammary gland bud morphogenesis	Sostdc1	Sostdc1	Sclerostin domain-containing protein 1	0.0372733	0.276641	26.8289
GO:1901987	regulation of cell cycle phase transition	Six3	Six3	Homeobox protein SIX3	0.0372733	0.276641	26.8289
GO:0048521	negative regulation of behavior	Esr2	Esr2	Estrogen receptor beta	0.0372733	0.276641	26.8289
GO:2000536	negative regulation of entry of bacterium into host cell	Itgav	Itgav	Integrin alpha-V	0.0372733	0.276641	26.8289
GO:0010359	regulation of anion channel activity	Hk1	Hk1	Hexokinase 1	0.0372733	0.276641	26.8289
GO:0060658	nipple morphogenesis	Rxfp1	Rxfp1	Relaxin receptor 1	0.0372733	0.276641	26.8289
GO:0050865	regulation of cell activation	Lmo4	Lmo4	LIM domain transcription factor LMO4	0.0372733	0.276641	26.8289
GO:0035644	phosphoanandamide dephosphorylation	Ptpn22	Ptpn22	Protein-tyrosine-phosphatase	0.0372733	0.276641	26.8289
GO:2000568	positive regulation of memory T cell activation	Tnfsf4	Tnfsf4	Tumor necrosis factor (Ligand) superfamily member 4	0.0372733	0.276641	26.8289
GO:0000117	regulation of transcription involved in G2/M transition of mitotic cell cycle	Bach1	Bach1	Transcription regulator protein BACH1	0.0372733	0.276641	26.8289
GO:0033037	polysaccharide localization	Chst11	Chst11	Uncharacterized protein	0.0372733	0.276641	26.8289
GO:2000572	positive regulation of interleukin-4-dependent isotype switching to IgE isotypes	Tnfsf4	Tnfsf4	Tumor necrosis factor (Ligand) superfamily member 4	0.0372733	0.276641	26.8289
GO:0042938	dipeptide transport	Slc15a2	Slc15a2	Solute carrier family 15 member 2	0.0372733	0.276641	26.8289
GO:0097640	L-ornithine import across plasma membrane	Slc7a2	Slc7a2	Cationic amino acid transporter 2A	0.0372733	0.276641	26.8289
GO:0070169	positive regulation of biomineral tissue development	Amtn	Amtn	Amelotin	0.0372733	0.276641	26.8289
GO:0046078	dUMP metabolic process	Tyms	Tyms	Thymidylate synthase, isoform CRA_b	0.0372733	0.276641	26.8289
GO:2001229	negative regulation of response to gamma radiation	Prkdc	Prkdc	DNA-dependent protein kinase catalytic subunit	0.0372733	0.276641	26.8289
GO:0010092	specification of organ identity	Tbr1	Tbr1	T-box brain protein 1	0.0372733	0.276641	26.8289
GO:0070175	positive regulation of enamel mineralization	Amtn	Amtn	Amelotin	0.0372733	0.276641	26.8289
GO:0097638	L-arginine import across plasma membrane	Slc7a2	Slc7a2	Cationic amino acid transporter 2A	0.0372733	0.276641	26.8289
GO:0097639	L-lysine import across plasma membrane	Slc7a2	Slc7a2	Cationic amino acid transporter 2A	0.0372733	0.276641	26.8289
GO:0072302	negative regulation of metanephric glomerular mesangial cell proliferation	Wt1	Wt1	Wilms tumor protein homolog	0.0372733	0.276641	26.8289
GO:2001246	negative regulation of phosphatidylcholine biosynthetic process	Lpcat1	Lpcat1	Lysophosphatidylcholine acyltransferase 1	0.0372733	0.276641	26.8289
GO:1900100	positive regulation of plasma cell differentiation	Xbp1	Xbp1	X-box-binding protein 1	0.0372733	0.276641	26.8289
GO:0048692	negative regulation of axon extension involved in regeneration	Tnr	Tnr	Tenascin-R	0.0372733	0.276641	26.8289
GO:0009946	proximal/distal axis specification	Six3	Six3	Homeobox protein SIX3	0.0372733	0.276641	26.8289
GO:0098586	cellular response to virus	Gli2	Gli2	GLI-Kruppel family member	0.0372733	0.276641	26.8289
GO:0006422	aspartyl-tRNA aminoacylation	Dars	Dars	Putative uncharacterized protein	0.0372733	0.276641	26.8289
GO:0051459	regulation of corticotropin secretion	Crhbp	Crhbp	Putative uncharacterized protein	0.0372733	0.276641	26.8289
GO:0051460	negative regulation of corticotropin secretion	Crhbp	Crhbp	Putative uncharacterized protein	0.0372733	0.276641	26.8289
GO:0007321	sperm displacement	Ppp3r2	Ppp3r2	Protein phosphatase 3, regulatory subunit B, alpha isoform (Calcineurin B, type II)	0.0372733	0.276641	26.8289
GO:0016267	O-glycan processing, core 1	C1galt1	C1galt1	Glycoprotein-N-acetylgalactosamine 3-beta-galactosyltransferase 1	0.0372733	0.276641	26.8289
GO:0035712	T-helper 2 cell activation	Tnfsf4	Tnfsf4	Tumor necrosis factor (Ligand) superfamily member 4	0.0372733	0.276641	26.8289
GO:0035713	response to nitrogen dioxide	Tnfsf4	Tnfsf4	Tumor necrosis factor (Ligand) superfamily member 4	0.0372733	0.276641	26.8289
GO:0035714	cellular response to nitrogen dioxide	Tnfsf4	Tnfsf4	Tumor necrosis factor (Ligand) superfamily member 4	0.0372733	0.276641	26.8289
GO:0035709	memory T cell activation	Tnfsf4	Tnfsf4	Tumor necrosis factor (Ligand) superfamily member 4	0.0372733	0.276641	26.8289
GO:0071838	cell proliferation in bone marrow	Ace	Ace	Angiotensin-converting enzyme	0.0372733	0.276641	26.8289
GO:0031393	negative regulation of prostaglandin biosynthetic process	Sirt1	Sirt1	Sirt1 protein	0.0372733	0.276641	26.8289
GO:0086052	membrane repolarization during SA node cell action potential	Cacna1d	Cacna1d	Cacna1d protein	0.0372733	0.276641	26.8289
GO:0035783	CD4-positive, alpha-beta T cell costimulation	Tnfsf4	Tnfsf4	Tumor necrosis factor (Ligand) superfamily member 4	0.0372733	0.276641	26.8289
GO:0060300	regulation of cytokine activity	Grem2	Grem2	Gremlin-2	0.0372733	0.276641	26.8289
GO:0060304	regulation of phosphatidylinositol dephosphorylation	Chrm5	Chrm5	Muscarinic acetylcholine receptor M5	0.0372733	0.276641	26.8289
GO:0061621	canonical glycolysis	Hk1	Hk1	Hexokinase 1	0.0372733	0.276641	26.8289
GO:2000425	regulation of apoptotic cell clearance	Itgav	Itgav	Integrin alpha-V	0.0372733	0.276641	26.8289
GO:0014844	myoblast proliferation involved in skeletal muscle regeneration	Mir682	Mir682	microRNA 682	0.0372733	0.276641	26.8289
GO:0044252	negative regulation of multicellular organismal metabolic process	Arrdc3	Arrdc3	Arrestin domain-containing protein 3	0.0372733	0.276641	26.8289
GO:0090128	regulation of synapse maturation	Disc1	Disc1	Disrupted in schizophrenia 1 homolog	0.0372733	0.276641	26.8289
GO:0060731	positive regulation of intestinal epithelial structure maintenance	Slc22a5	Slc22a5	Solute carrier family 22 member 5	0.0372733	0.276641	26.8289
GO:1900011	negative regulation of corticotropin-releasing hormone receptor activity	Crhbp	Crhbp	Putative uncharacterized protein	0.0372733	0.276641	26.8289
GO:0060007	linear vestibuloocular reflex	Slitrk6	Slitrk6	SLIT and NTRK-like family, member 6	0.0372733	0.276641	26.8289
GO:0034178	toll-like receptor 13 signaling pathway	Tlr13	Tlr13	Toll-like receptor 13	0.0372733	0.276641	26.8289
GO:0061358	negative regulation of Wnt protein secretion	Oprm1	Oprm1	Mu opioid receptor mMOR-1R2	0.0372733	0.276641	26.8289
GO:0006948	induction by virus of host cell-cell fusion	Cd4	Cd4	T4 surface glycoprotein	0.0372733	0.276641	26.8289
GO:0051977	lysophospholipid transport	Pla2g10	Pla2g10	Phospholipase A(2)	0.0372733	0.276641	26.8289
GO:0072431	signal transduction involved in mitotic G1 DNA damage checkpoint	Prkdc	Prkdc	DNA-dependent protein kinase catalytic subunit	0.0372733	0.276641	26.8289
GO:0046177	D-gluconate catabolic process	Idnk	Idnk	Probable gluconokinase	0.0372733	0.276641	26.8289
GO:1903141	negative regulation of establishment of endothelial barrier	S1pr3	S1pr3	Sphingosine 1-phosphate receptor 3	0.0372733	0.276641	26.8289
GO:0072087	renal vesicle development	Hey1	Hey1	Putative uncharacterized protein	0.0372733	0.276641	26.8289
GO:0060096	serotonin secretion, neurotransmission	Xbp1	Xbp1	X-box-binding protein 1	0.0372733	0.276641	26.8289
GO:0032812	positive regulation of epinephrine secretion	Cartpt	Cartpt	Cocaine- and amphetamine-regulated transcript protein	0.0372733	0.276641	26.8289
GO:0032817	regulation of natural killer cell proliferation	Ptpn22	Ptpn22	Protein-tyrosine-phosphatase	0.0372733	0.276641	26.8289
GO:0097338	response to clozapine	Prkacb	Prkacb	cAMP-dependent protein kinase catalytic subunit beta transcript variant 5	0.0372733	0.276641	26.8289
GO:1903597	negative regulation of gap junction assembly	Ace	Ace	Angiotensin-converting enzyme	0.0372733	0.276641	26.8289
GO:1903118	urate homeostasis	Oit3	Oit3	Putative uncharacterized protein	0.0372733	0.276641	26.8289
GO:0032857	activation of ARF GTPase activity	Iqsec3	Iqsec3	IQ motif and SEC7 domain-containing protein 3	0.0372733	0.276641	26.8289
GO:0051097	negative regulation of helicase activity	Sirt1	Sirt1	Sirt1 protein	0.0372733	0.276641	26.8289
GO:0038098	sequestering of BMP from receptor via BMP binding	Grem2	Grem2	Gremlin-2	0.0372733	0.276641	26.8289
GO:0007356	thorax and anterior abdomen determination	Wt1	Wt1	Wilms tumor protein homolog	0.0372733	0.276641	26.8289
GO:1900827	positive regulation of membrane depolarization during cardiac muscle cell action potential	Ank3	Ank3	Ankyrin-3	0.0372733	0.276641	26.8289
GO:2000706	negative regulation of dense core granule biogenesis	Rest	Rest	REST4	0.0372733	0.276641	26.8289
GO:2000707	positive regulation of dense core granule biogenesis	Prkca	Prkca	Protein kinase C alpha type	0.0372733	0.276641	26.8289
GO:0045607	regulation of auditory receptor cell differentiation	Hey2	Hey2	Hairy/enhancer-of-split related with YRPW motif 2	0.0372733	0.276641	26.8289
GO:1903047	mitotic cell cycle process	Kif14	Kif14	Kinesin-like protein	0.0372733	0.276641	26.8289
GO:1903045	neural crest cell migration involved in sympathetic nervous system development	Sema3a	Sema3a	Semaphorin-3A	0.0372733	0.276641	26.8289
GO:0002932	tendon sheath development	Mkx	Mkx	Mohawk homeobox	0.0372733	0.276641	26.8289
GO:0021685	cerebellar granular layer structural organization	Kif14	Kif14	Kinesin-like protein	0.0372733	0.276641	26.8289
GO:0021693	cerebellar Purkinje cell layer structural organization	Kif14	Kif14	Kinesin-like protein	0.0372733	0.276641	26.8289
GO:2000740	negative regulation of mesenchymal stem cell differentiation	Rest	Rest	REST4	0.0372733	0.276641	26.8289
GO:0060400	negative regulation of growth hormone receptor signaling pathway	Leprot	Leprot	Leptin receptor gene-related protein	0.0372733	0.276641	26.8289
GO:0048789	cytoskeletal matrix organization at active zone	Nlgn1	Nlgn1	Neuroligin-1	0.0372733	0.276641	26.8289
GO:2000302	positive regulation of synaptic vesicle exocytosis	Nlgn1	Nlgn1	Neuroligin-1	0.0372733	0.276641	26.8289
GO:2000798	negative regulation of amniotic stem cell differentiation	Rest	Rest	REST4	0.0372733	0.276641	26.8289
GO:0015868	purine ribonucleotide transport	Gjb1	Gjb1	Gap junction beta-1 protein	0.0372733	0.276641	26.8289
GO:0009187	cyclic nucleotide metabolic process	Cngb3	Cngb3	Cyclic nucleotide-gated cation channel beta-3	0.0372733	0.276641	26.8289
GO:0043056	forward locomotion	Ttn	Ttn	Titin	0.0372733	0.276641	26.8289
GO:0045234	protein palmitoleylation	Cd4	Cd4	T4 surface glycoprotein	0.0372733	0.276641	26.8289
GO:0001568	blood vessel development	Tcf7l2	Tcf7l2	Transcription factor 7-like 2	0.0384497	0.28455	2.40258
GO:0001568	blood vessel development	Itgav	Itgav	Integrin alpha-V	0.0384497	0.28455	2.40258
GO:0001568	blood vessel development	Hey2	Hey2	Hairy/enhancer-of-split related with YRPW motif 2	0.0384497	0.28455	2.40258
GO:0001568	blood vessel development	Agtr1a	Agtr1a	Type-1A angiotensin II receptor	0.0384497	0.28455	2.40258
GO:0001568	blood vessel development	Hey1	Hey1	Putative uncharacterized protein	0.0384497	0.28455	2.40258
GO:0001568	blood vessel development	Tnfsf4	Tnfsf4	Tumor necrosis factor (Ligand) superfamily member 4	0.0384497	0.28455	2.40258
GO:0050890	cognition	Gtf2a1l	Gtf2a1l	TFIIA-alpha and beta-like factor	0.0401851	0.287456	3.06615
GO:0050890	cognition	Nipbl	Nipbl	Nipbl protein	0.0401851	0.287456	3.06615
GO:0050890	cognition	Tusc3	Tusc3	Putative uncharacterized protein	0.0401851	0.287456	3.06615
GO:0050890	cognition	Chl1	Chl1	Neural cell adhesion molecule L1-like protein	0.0401851	0.287456	3.06615
GO:0007188	adenylate cyclase-modulating G-protein coupled receptor signaling pathway	Prkacb	Prkacb	cAMP-dependent protein kinase catalytic subunit beta transcript variant 5	0.0401851	0.287456	3.06615
GO:0007188	adenylate cyclase-modulating G-protein coupled receptor signaling pathway	Cacna1d	Cacna1d	Cacna1d protein	0.0401851	0.287456	3.06615
GO:0007188	adenylate cyclase-modulating G-protein coupled receptor signaling pathway	Glp2r	Glp2r	Glucagon-like peptide 2 receptor	0.0401851	0.287456	3.06615
GO:0007188	adenylate cyclase-modulating G-protein coupled receptor signaling pathway	Rxfp1	Rxfp1	Relaxin receptor 1	0.0401851	0.287456	3.06615
GO:0016337	single organismal cell-cell adhesion	Lsamp	Lsamp	Limbic system-associated membrane protein	0.040546	0.287456	2.06376
GO:0016337	single organismal cell-cell adhesion	Cdc42	Cdc42	Cell division control protein 42 homolog	0.040546	0.287456	2.06376
GO:0016337	single organismal cell-cell adhesion	Lama3	Lama3	Putative uncharacterized protein	0.040546	0.287456	2.06376
GO:0016337	single organismal cell-cell adhesion	Negr1	Negr1	Neuronal growth regulator 1	0.040546	0.287456	2.06376
GO:0016337	single organismal cell-cell adhesion	Fndc3a	Fndc3a	Fibronectin type-III domain-containing protein 3A	0.040546	0.287456	2.06376
GO:0016337	single organismal cell-cell adhesion	Cdh5	Cdh5	Cadherin-5	0.040546	0.287456	2.06376
GO:0016337	single organismal cell-cell adhesion	Ntm	Ntm	Neurotrimin	0.040546	0.287456	2.06376
GO:0016337	single organismal cell-cell adhesion	Pard3	Pard3	Par-3 (Partitioning defective 3) homolog (C. elegans)	0.040546	0.287456	2.06376
GO:0001843	neural tube closure	Prkacb	Prkacb	cAMP-dependent protein kinase catalytic subunit beta transcript variant 5	0.0414114	0.287456	2.18374
GO:0001843	neural tube closure	Opa1	Opa1	Dynamin-like 120 kDa protein, mitochondrial	0.0414114	0.287456	2.18374
GO:0001843	neural tube closure	Lmo4	Lmo4	LIM domain transcription factor LMO4	0.0414114	0.287456	2.18374
GO:0001843	neural tube closure	Kif20b	Kif20b	Kinesin-like protein KIF20B	0.0414114	0.287456	2.18374
GO:0001843	neural tube closure	Zic5	Zic5	Zinc finger protein ZIC 5	0.0414114	0.287456	2.18374
GO:0001843	neural tube closure	Lhx2	Lhx2	LIM/homeobox protein Lhx2	0.0414114	0.287456	2.18374
GO:0001843	neural tube closure	Dlc1	Dlc1	A730069N07Rik/deleted in liver cancer 1 fusion protein	0.0414114	0.287456	2.18374
GO:0000188	inactivation of MAPK activity	Prkca	Prkca	Protein kinase C alpha type	0.0416247	0.287456	3.83269
GO:0000188	inactivation of MAPK activity	Dusp3	Dusp3	Dual-specificity protein phosphatase 3	0.0416247	0.287456	3.83269
GO:0000188	inactivation of MAPK activity	Dusp4	Dusp4	Dual specificity protein phosphatase 4	0.0416247	0.287456	3.83269
GO:0060716	labyrinthine layer blood vessel development	Hey2	Hey2	Hairy/enhancer-of-split related with YRPW motif 2	0.0416247	0.287456	3.83269
GO:0060716	labyrinthine layer blood vessel development	Wnt2	Wnt2	Protein Wnt-2	0.0416247	0.287456	3.83269
GO:0060716	labyrinthine layer blood vessel development	Hey1	Hey1	Putative uncharacterized protein	0.0416247	0.287456	3.83269
GO:2000273	positive regulation of receptor activity	Actn2	Actn2	Alpha-actinin-2	0.0416247	0.287456	3.83269
GO:2000273	positive regulation of receptor activity	Prkce	Prkce	Protein kinase C epsilon type	0.0416247	0.287456	3.83269
GO:2000273	positive regulation of receptor activity	Igf2	Igf2	Insulin-like growth factor 2	0.0416247	0.287456	3.83269
GO:0035902	response to immobilization stress	Fos	Fos	Proto-oncogene c-Fos	0.0416247	0.287456	3.83269
GO:0035902	response to immobilization stress	Gal	Gal	Galanin peptides	0.0416247	0.287456	3.83269
GO:0035902	response to immobilization stress	Hnmt	Hnmt	Histamine N-methyltransferase	0.0416247	0.287456	3.83269
GO:0042104	positive regulation of activated T cell proliferation	Il12b	Il12b	Interleukin-12 subunit beta	0.0416247	0.287456	3.83269
GO:0042104	positive regulation of activated T cell proliferation	Tnfsf4	Tnfsf4	Tumor necrosis factor (Ligand) superfamily member 4	0.0416247	0.287456	3.83269
GO:0042104	positive regulation of activated T cell proliferation	Igf2	Igf2	Insulin-like growth factor 2	0.0416247	0.287456	3.83269
GO:1902166	negative regulation of intrinsic apoptotic signaling pathway in response to DNA damage by p53 class mediator	Sirt1	Sirt1	Sirt1 protein	0.0419766	0.287456	5.96197
GO:1902166	negative regulation of intrinsic apoptotic signaling pathway in response to DNA damage by p53 class mediator	Kdm1a	Kdm1a	Lysine-specific histone demethylase 1A	0.0419766	0.287456	5.96197
GO:0006163	purine nucleotide metabolic process	Fhit	Fhit	Bis(5'-adenosyl)-triphosphatase	0.0419766	0.287456	5.96197
GO:0006163	purine nucleotide metabolic process	Nme4	Nme4	Nucleoside diphosphate kinase	0.0419766	0.287456	5.96197
GO:0034616	response to laminar fluid shear stress	Tgfb3	Tgfb3	Transforming growth factor beta-3	0.0419766	0.287456	5.96197
GO:0034616	response to laminar fluid shear stress	Abca1	Abca1	ATP-binding cassette sub-family A member 1	0.0419766	0.287456	5.96197
GO:0010224	response to UV-B	Il12b	Il12b	Interleukin-12 subunit beta	0.0419766	0.287456	5.96197
GO:0010224	response to UV-B	Ercc6	Ercc6	Ercc6 protein	0.0419766	0.287456	5.96197
GO:0060997	dendritic spine morphogenesis	Shank1	Shank1	SH3 and multiple ankyrin repeat domains protein 1	0.0419766	0.287456	5.96197
GO:0060997	dendritic spine morphogenesis	Epha5	Epha5	Receptor protein-tyrosine kinase	0.0419766	0.287456	5.96197
GO:0060541	respiratory system development	Mnx1	Mnx1	Homeobox gene HB9	0.0419766	0.287456	5.96197
GO:0060541	respiratory system development	Spry2	Spry2	Sprouty homolog 2 (Drosophila)	0.0419766	0.287456	5.96197
GO:0070493	thrombin receptor signaling pathway	Dgkq	Dgkq	Diacylglycerol kinase theta	0.0419766	0.287456	5.96197
GO:0070493	thrombin receptor signaling pathway	Hpgd	Hpgd	15-hydroxyprostaglandin dehydrogenase [NAD(+)]	0.0419766	0.287456	5.96197
GO:0034332	adherens junction organization	Cdc42	Cdc42	Cell division control protein 42 homolog	0.0419766	0.287456	5.96197
GO:0034332	adherens junction organization	Csk	Csk	Tyrosine-protein kinase CSK	0.0419766	0.287456	5.96197
GO:0050805	negative regulation of synaptic transmission	Tnr	Tnr	Tenascin-R	0.0419766	0.287456	5.96197
GO:0050805	negative regulation of synaptic transmission	Rapgef4	Rapgef4	Rapgef4 protein	0.0419766	0.287456	5.96197
GO:0051489	regulation of filopodium assembly	Cdc42	Cdc42	Cell division control protein 42 homolog	0.0419766	0.287456	5.96197
GO:0051489	regulation of filopodium assembly	Myo10	Myo10	Unconventional myosin-X	0.0419766	0.287456	5.96197
GO:0014883	transition between fast and slow fiber	Ppp3ca	Ppp3ca	Serine/threonine-protein phosphatase 2B catalytic subunit alpha isoform	0.0419766	0.287456	5.96197
GO:0014883	transition between fast and slow fiber	Gtf2ird2	Gtf2ird2	General transcription factor II-I repeat domain-containing protein 2	0.0419766	0.287456	5.96197
GO:2000270	negative regulation of fibroblast apoptotic process	Sirt1	Sirt1	Sirt1 protein	0.0419766	0.287456	5.96197
GO:2000270	negative regulation of fibroblast apoptotic process	Pik3cg	Pik3cg	Phosphoinositide-3-kinase gamma polypeptide	0.0419766	0.287456	5.96197
GO:0060013	righting reflex	Shank1	Shank1	SH3 and multiple ankyrin repeat domains protein 1	0.0419766	0.287456	5.96197
GO:0060013	righting reflex	Pcdh15	Pcdh15	Protocadherin-15	0.0419766	0.287456	5.96197
GO:0032836	glomerular basement membrane development	Sulf1	Sulf1	Extracellular sulfatase Sulf-1	0.0419766	0.287456	5.96197
GO:0032836	glomerular basement membrane development	Wt1	Wt1	Wilms tumor protein homolog	0.0419766	0.287456	5.96197
GO:0032835	glomerulus development	Ptpro	Ptpro	Protein-tyrosine-phosphatase	0.0419766	0.287456	5.96197
GO:0032835	glomerulus development	Wt1	Wt1	Wilms tumor protein homolog	0.0419766	0.287456	5.96197
GO:0055001	muscle cell development	Sgcz	Sgcz	Zeta-sarcoglycan	0.0419766	0.287456	5.96197
GO:0055001	muscle cell development	Kdm1a	Kdm1a	Lysine-specific histone demethylase 1A	0.0419766	0.287456	5.96197
GO:0015833	peptide transport	Slc15a2	Slc15a2	Solute carrier family 15 member 2	0.0419766	0.287456	5.96197
GO:0015833	peptide transport	Abcb9	Abcb9	ATP-binding cassette sub-family B member 9	0.0419766	0.287456	5.96197
GO:2000773	negative regulation of cellular senescence	Prkdc	Prkdc	DNA-dependent protein kinase catalytic subunit	0.0419766	0.287456	5.96197
GO:2000773	negative regulation of cellular senescence	Sirt1	Sirt1	Sirt1 protein	0.0419766	0.287456	5.96197
GO:0060840	artery development	Hey2	Hey2	Hairy/enhancer-of-split related with YRPW motif 2	0.0419766	0.287456	5.96197
GO:0060840	artery development	Hey1	Hey1	Putative uncharacterized protein	0.0419766	0.287456	5.96197
GO:0016311	dephosphorylation	Ppp3ca	Ppp3ca	Serine/threonine-protein phosphatase 2B catalytic subunit alpha isoform	0.0425992	0.290943	1.70968
GO:0016311	dephosphorylation	Alpl	Alpl	Alkaline phosphatase, tissue-nonspecific isozyme	0.0425992	0.290943	1.70968
GO:0016311	dephosphorylation	Ssh1	Ssh1	Protein phosphatase Slingshot homolog 1	0.0425992	0.290943	1.70968
GO:0016311	dephosphorylation	Cdc14a	Cdc14a	Dual specificity protein phosphatase CDC14A	0.0425992	0.290943	1.70968
GO:0016311	dephosphorylation	Timm50	Timm50	Putative uncharacterized protein	0.0425992	0.290943	1.70968
GO:0016311	dephosphorylation	Synj2	Synj2	Synaptojanin-2	0.0425992	0.290943	1.70968
GO:0016311	dephosphorylation	Dusp3	Dusp3	Dual-specificity protein phosphatase 3	0.0425992	0.290943	1.70968
GO:0016311	dephosphorylation	Ptpn22	Ptpn22	Protein-tyrosine-phosphatase	0.0425992	0.290943	1.70968
GO:0016311	dephosphorylation	Dusp4	Dusp4	Dual specificity protein phosphatase 4	0.0425992	0.290943	1.70968
GO:0016311	dephosphorylation	Ptpro	Ptpro	Protein-tyrosine-phosphatase	0.0425992	0.290943	1.70968
GO:0016311	dephosphorylation	Lpin1	Lpin1	Phosphatidate phosphatase LPIN1	0.0425992	0.290943	1.70968
GO:0016311	dephosphorylation	Ppp3r2	Ppp3r2	Protein phosphatase 3, regulatory subunit B, alpha isoform (Calcineurin B, type II)	0.0425992	0.290943	1.70968
GO:0016311	dephosphorylation	Dnajc6	Dnajc6	Putative tyrosine-protein phosphatase auxilin	0.0425992	0.290943	1.70968
GO:0032956	regulation of actin cytoskeleton organization	Epha3	Epha3	Receptor protein-tyrosine kinase	0.0439235	0.298401	2.98098
GO:0032956	regulation of actin cytoskeleton organization	Twf2	Twf2	Twinfilin-2	0.0439235	0.298401	2.98098
GO:0032956	regulation of actin cytoskeleton organization	Epha5	Epha5	Receptor protein-tyrosine kinase	0.0439235	0.298401	2.98098
GO:0032956	regulation of actin cytoskeleton organization	Dlc1	Dlc1	A730069N07Rik/deleted in liver cancer 1 fusion protein	0.0439235	0.298401	2.98098
GO:0005977	glycogen metabolic process	Tcf7l2	Tcf7l2	Transcription factor 7-like 2	0.0439235	0.298401	2.98098
GO:0005977	glycogen metabolic process	Il6st	Il6st	Interleukin-6 signal transductor	0.0439235	0.298401	2.98098
GO:0005977	glycogen metabolic process	Akt2	Akt2	RAC-beta serine/threonine-protein kinase	0.0439235	0.298401	2.98098
GO:0005977	glycogen metabolic process	Ppp3r2	Ppp3r2	Protein phosphatase 3, regulatory subunit B, alpha isoform (Calcineurin B, type II)	0.0439235	0.298401	2.98098
GO:0048010	vascular endothelial growth factor receptor signaling pathway	Sulf1	Sulf1	Extracellular sulfatase Sulf-1	0.0469023	0.31002	3.65848
GO:0048010	vascular endothelial growth factor receptor signaling pathway	Xbp1	Xbp1	X-box-binding protein 1	0.0469023	0.31002	3.65848
GO:0048010	vascular endothelial growth factor receptor signaling pathway	Prkd1	Prkd1	Serine/threonine-protein kinase D1	0.0469023	0.31002	3.65848
GO:0014065	phosphatidylinositol 3-kinase signaling	Xbp1	Xbp1	X-box-binding protein 1	0.0469023	0.31002	3.65848
GO:0014065	phosphatidylinositol 3-kinase signaling	Nyap1	Nyap1	Neuronal tyrosine-phosphorylated phosphoinositide-3-kinase adapter 1	0.0469023	0.31002	3.65848
GO:0014065	phosphatidylinositol 3-kinase signaling	Pik3cg	Pik3cg	Phosphoinositide-3-kinase gamma polypeptide	0.0469023	0.31002	3.65848
GO:0002053	positive regulation of mesenchymal cell proliferation	Mycn	Mycn	N-myc proto-oncogene protein	0.0478502	0.31002	2.90042
GO:0002053	positive regulation of mesenchymal cell proliferation	Wnt2	Wnt2	Protein Wnt-2	0.0478502	0.31002	2.90042
GO:0002053	positive regulation of mesenchymal cell proliferation	Fgf9	Fgf9	Fibroblast growth factor 9	0.0478502	0.31002	2.90042
GO:0002053	positive regulation of mesenchymal cell proliferation	Shox2	Shox2	Short stature homeobox protein 2	0.0478502	0.31002	2.90042
GO:0006357	regulation of transcription from RNA polymerase II promoter	Rad21	Rad21	RAD21 homolog (S. pombe)	0.0494408	0.31002	1.44851
GO:0006357	regulation of transcription from RNA polymerase II promoter	Tcf7l2	Tcf7l2	Transcription factor 7-like 2	0.0494408	0.31002	1.44851
GO:0006357	regulation of transcription from RNA polymerase II promoter	Rbpjl	Rbpjl	Recombining binding protein suppressor of hairless-like protein	0.0494408	0.31002	1.44851
GO:0006357	regulation of transcription from RNA polymerase II promoter	Fos	Fos	Proto-oncogene c-Fos	0.0494408	0.31002	1.44851
GO:0006357	regulation of transcription from RNA polymerase II promoter	Hey2	Hey2	Hairy/enhancer-of-split related with YRPW motif 2	0.0494408	0.31002	1.44851
GO:0006357	regulation of transcription from RNA polymerase II promoter	Xbp1	Xbp1	X-box-binding protein 1	0.0494408	0.31002	1.44851
GO:0006357	regulation of transcription from RNA polymerase II promoter	Zkscan2	Zkscan2	Protein Zkscan2	0.0494408	0.31002	1.44851
GO:0006357	regulation of transcription from RNA polymerase II promoter	Etv5	Etv5	ETS translocation variant 5	0.0494408	0.31002	1.44851
GO:0006357	regulation of transcription from RNA polymerase II promoter	Rest	Rest	REST4	0.0494408	0.31002	1.44851
GO:0006357	regulation of transcription from RNA polymerase II promoter	Frzb	Frzb	Secreted frizzled-related protein 3	0.0494408	0.31002	1.44851
GO:0006357	regulation of transcription from RNA polymerase II promoter	Barhl2	Barhl2	Barhl2 protein	0.0494408	0.31002	1.44851
GO:0006357	regulation of transcription from RNA polymerase II promoter	Sox30	Sox30	Transcription factor SOX-30	0.0494408	0.31002	1.44851
GO:0006357	regulation of transcription from RNA polymerase II promoter	Foxq1	Foxq1	Forkhead box protein Q1	0.0494408	0.31002	1.44851
GO:0006357	regulation of transcription from RNA polymerase II promoter	Ldb2	Ldb2	LIM domain-binding protein 2	0.0494408	0.31002	1.44851
GO:0006357	regulation of transcription from RNA polymerase II promoter	Lpin1	Lpin1	Phosphatidate phosphatase LPIN1	0.0494408	0.31002	1.44851
GO:0006357	regulation of transcription from RNA polymerase II promoter	Wt1	Wt1	Wilms tumor protein homolog	0.0494408	0.31002	1.44851
GO:0006357	regulation of transcription from RNA polymerase II promoter	Dgkq	Dgkq	Diacylglycerol kinase theta	0.0494408	0.31002	1.44851
GO:0006357	regulation of transcription from RNA polymerase II promoter	Lhx2	Lhx2	LIM/homeobox protein Lhx2	0.0494408	0.31002	1.44851
GO:0006357	regulation of transcription from RNA polymerase II promoter	Smad1	Smad1	Mothers against decapentaplegic homolog 1	0.0494408	0.31002	1.44851
GO:0006357	regulation of transcription from RNA polymerase II promoter	Meis1	Meis1	Homeobox protein Meis1	0.0494408	0.31002	1.44851
GO:0006357	regulation of transcription from RNA polymerase II promoter	Glis1	Glis1	Zinc finger protein GLIS1	0.0494408	0.31002	1.44851
GO:0006357	regulation of transcription from RNA polymerase II promoter	Kdm1a	Kdm1a	Lysine-specific histone demethylase 1A	0.0494408	0.31002	1.44851
GO:0006357	regulation of transcription from RNA polymerase II promoter	Pknox1	Pknox1	Homeobox protein PKNOX1	0.0494408	0.31002	1.44851
GO:0010656	negative regulation of muscle cell apoptotic process	Igf1r	Igf1r	Tyrosine-protein kinase receptor	0.0511991	0.31002	5.36577
GO:0010656	negative regulation of muscle cell apoptotic process	Smad1	Smad1	Mothers against decapentaplegic homolog 1	0.0511991	0.31002	5.36577
GO:0045722	positive regulation of gluconeogenesis	Tcf7l2	Tcf7l2	Transcription factor 7-like 2	0.0511991	0.31002	5.36577
GO:0045722	positive regulation of gluconeogenesis	Sirt1	Sirt1	Sirt1 protein	0.0511991	0.31002	5.36577
GO:0010225	response to UV-C	Dcun1d3	Dcun1d3	DCN1-like protein 3	0.0511991	0.31002	5.36577
GO:0010225	response to UV-C	Ercc5	Ercc5	Excision repair cross-complementing rodent repair deficiency, complementation group 5	0.0511991	0.31002	5.36577
GO:0016559	peroxisome fission	Pex11a	Pex11a	Putative uncharacterized protein	0.0511991	0.31002	5.36577
GO:0016559	peroxisome fission	Acox1	Acox1	Peroxisomal acyl-coenzyme A oxidase 1	0.0511991	0.31002	5.36577
GO:0006283	transcription-coupled nucleotide-excision repair	Ercc6	Ercc6	Ercc6 protein	0.0511991	0.31002	5.36577
GO:0006283	transcription-coupled nucleotide-excision repair	Ercc5	Ercc5	Excision repair cross-complementing rodent repair deficiency, complementation group 5	0.0511991	0.31002	5.36577
GO:0003334	keratinocyte development	Cdc42	Cdc42	Cell division control protein 42 homolog	0.0511991	0.31002	5.36577
GO:0003334	keratinocyte development	Exph5	Exph5	Exophilin-5	0.0511991	0.31002	5.36577
GO:0090136	epithelial cell-cell adhesion	Plekha7	Plekha7	Pleckstrin homology domain-containing family A member 7	0.0511991	0.31002	5.36577
GO:0090136	epithelial cell-cell adhesion	Cdc42	Cdc42	Cell division control protein 42 homolog	0.0511991	0.31002	5.36577
GO:0071872	cellular response to epinephrine stimulus	Pde4d	Pde4d	Phosphodiesterase 4D, cAMP specific	0.0511991	0.31002	5.36577
GO:0071872	cellular response to epinephrine stimulus	Pde4b	Pde4b	Protein Pde4b	0.0511991	0.31002	5.36577
GO:0045651	positive regulation of macrophage differentiation	Id2	Id2	DNA-binding protein inhibitor ID-2	0.0511991	0.31002	5.36577
GO:0045651	positive regulation of macrophage differentiation	Prkca	Prkca	Protein kinase C alpha type	0.0511991	0.31002	5.36577
GO:0048703	embryonic viscerocranium morphogenesis	Chst11	Chst11	Uncharacterized protein	0.0511991	0.31002	5.36577
GO:0048703	embryonic viscerocranium morphogenesis	Nipbl	Nipbl	Nipbl protein	0.0511991	0.31002	5.36577
GO:0031065	positive regulation of histone deacetylation	Nipbl	Nipbl	Nipbl protein	0.0511991	0.31002	5.36577
GO:0031065	positive regulation of histone deacetylation	Lpin1	Lpin1	Phosphatidate phosphatase LPIN1	0.0511991	0.31002	5.36577
GO:0043010	camera-type eye development	Map3k1	Map3k1	Mitogen-activated protein kinase kinase kinase 1	0.0516548	0.31002	2.23574
GO:0043010	camera-type eye development	Slitrk6	Slitrk6	SLIT and NTRK-like family, member 6	0.0516548	0.31002	2.23574
GO:0043010	camera-type eye development	Wt1	Wt1	Wilms tumor protein homolog	0.0516548	0.31002	2.23574
GO:0043010	camera-type eye development	Mitf	Mitf	Microphthalmia-associated transcription factor B isoform	0.0516548	0.31002	2.23574
GO:0043010	camera-type eye development	Six3	Six3	Homeobox protein SIX3	0.0516548	0.31002	2.23574
GO:0043010	camera-type eye development	Pknox1	Pknox1	Homeobox protein PKNOX1	0.0516548	0.31002	2.23574
GO:0048041	focal adhesion assembly	Itgav	Itgav	Integrin alpha-V	0.0524918	0.31002	3.49942
GO:0048041	focal adhesion assembly	Actn2	Actn2	Alpha-actinin-2	0.0524918	0.31002	3.49942
GO:0048041	focal adhesion assembly	Dlc1	Dlc1	A730069N07Rik/deleted in liver cancer 1 fusion protein	0.0524918	0.31002	3.49942
GO:0010765	positive regulation of sodium ion transport	Akt2	Akt2	RAC-beta serine/threonine-protein kinase	0.0524918	0.31002	3.49942
GO:0010765	positive regulation of sodium ion transport	Sgk1	Sgk1	Serine/threonine-protein kinase Sgk1	0.0524918	0.31002	3.49942
GO:0010765	positive regulation of sodium ion transport	Ank3	Ank3	Ankyrin-3	0.0524918	0.31002	3.49942
GO:0090103	cochlea morphogenesis	Frzb	Frzb	Secreted frizzled-related protein 3	0.0524918	0.31002	3.49942
GO:0090103	cochlea morphogenesis	Gli2	Gli2	GLI-Kruppel family member	0.0524918	0.31002	3.49942
GO:0090103	cochlea morphogenesis	Six1	Six1	Putative uncharacterized protein	0.0524918	0.31002	3.49942
GO:0042098	T cell proliferation	Ncstn	Ncstn	Nicastrin	0.0524918	0.31002	3.49942
GO:0042098	T cell proliferation	Ccnd3	Ccnd3	G1/S-specific cyclin-D3	0.0524918	0.31002	3.49942
GO:0042098	T cell proliferation	Tnfsf4	Tnfsf4	Tumor necrosis factor (Ligand) superfamily member 4	0.0524918	0.31002	3.49942
GO:0019835	cytolysis	Mmd2	Mmd2	Monocyte to macrophage differentiation-associated 2, isoform CRA_b	0.0524918	0.31002	3.49942
GO:0019835	cytolysis	Mmd	Mmd	Putative uncharacterized protein	0.0524918	0.31002	3.49942
GO:0019835	cytolysis	Gzmb	Gzmb	Granzyme B(G,H)	0.0524918	0.31002	3.49942
GO:0006366	transcription from RNA polymerase II promoter	Rad21	Rad21	RAD21 homolog (S. pombe)	0.0540442	0.31002	1.3722
GO:0006366	transcription from RNA polymerase II promoter	Sox12	Sox12	Transcription factor SOX-12	0.0540442	0.31002	1.3722
GO:0006366	transcription from RNA polymerase II promoter	Rbpjl	Rbpjl	Recombining binding protein suppressor of hairless-like protein	0.0540442	0.31002	1.3722
GO:0006366	transcription from RNA polymerase II promoter	Gtf2a1l	Gtf2a1l	TFIIA-alpha and beta-like factor	0.0540442	0.31002	1.3722
GO:0006366	transcription from RNA polymerase II promoter	Meis3	Meis3	Homeobox protein Meis3	0.0540442	0.31002	1.3722
GO:0006366	transcription from RNA polymerase II promoter	Fos	Fos	Proto-oncogene c-Fos	0.0540442	0.31002	1.3722
GO:0006366	transcription from RNA polymerase II promoter	Lmo4	Lmo4	LIM domain transcription factor LMO4	0.0540442	0.31002	1.3722
GO:0006366	transcription from RNA polymerase II promoter	Esr2	Esr2	Estrogen receptor beta	0.0540442	0.31002	1.3722
GO:0006366	transcription from RNA polymerase II promoter	Hnrnpk	Hnrnpk	Heterogeneous nuclear ribonucleoprotein K	0.0540442	0.31002	1.3722
GO:0006366	transcription from RNA polymerase II promoter	Hey2	Hey2	Hairy/enhancer-of-split related with YRPW motif 2	0.0540442	0.31002	1.3722
GO:0006366	transcription from RNA polymerase II promoter	Xbp1	Xbp1	X-box-binding protein 1	0.0540442	0.31002	1.3722
GO:0006366	transcription from RNA polymerase II promoter	Zkscan2	Zkscan2	Protein Zkscan2	0.0540442	0.31002	1.3722
GO:0006366	transcription from RNA polymerase II promoter	Etv5	Etv5	ETS translocation variant 5	0.0540442	0.31002	1.3722
GO:0006366	transcription from RNA polymerase II promoter	Rest	Rest	REST4	0.0540442	0.31002	1.3722
GO:0006366	transcription from RNA polymerase II promoter	Gtf2a1	Gtf2a1	Gtf2a1 protein	0.0540442	0.31002	1.3722
GO:0006366	transcription from RNA polymerase II promoter	Barhl2	Barhl2	Barhl2 protein	0.0540442	0.31002	1.3722
GO:0006366	transcription from RNA polymerase II promoter	Sox30	Sox30	Transcription factor SOX-30	0.0540442	0.31002	1.3722
GO:0006366	transcription from RNA polymerase II promoter	Foxq1	Foxq1	Forkhead box protein Q1	0.0540442	0.31002	1.3722
GO:0006366	transcription from RNA polymerase II promoter	Bach1	Bach1	Transcription regulator protein BACH1	0.0540442	0.31002	1.3722
GO:0006366	transcription from RNA polymerase II promoter	Wt1	Wt1	Wilms tumor protein homolog	0.0540442	0.31002	1.3722
GO:0006366	transcription from RNA polymerase II promoter	Mitf	Mitf	Microphthalmia-associated transcription factor B isoform	0.0540442	0.31002	1.3722
GO:0006366	transcription from RNA polymerase II promoter	Cebpz	Cebpz	CCAAT/enhancer-binding protein zeta	0.0540442	0.31002	1.3722
GO:0006366	transcription from RNA polymerase II promoter	Hey1	Hey1	Putative uncharacterized protein	0.0540442	0.31002	1.3722
GO:0006366	transcription from RNA polymerase II promoter	Lhx2	Lhx2	LIM/homeobox protein Lhx2	0.0540442	0.31002	1.3722
GO:0006366	transcription from RNA polymerase II promoter	Meis1	Meis1	Homeobox protein Meis1	0.0540442	0.31002	1.3722
GO:0006366	transcription from RNA polymerase II promoter	Glis1	Glis1	Zinc finger protein GLIS1	0.0540442	0.31002	1.3722
GO:0006366	transcription from RNA polymerase II promoter	Mkx	Mkx	Mohawk homeobox	0.0540442	0.31002	1.3722
GO:0006366	transcription from RNA polymerase II promoter	Six3	Six3	Homeobox protein SIX3	0.0540442	0.31002	1.3722
GO:0006366	transcription from RNA polymerase II promoter	Pknox1	Pknox1	Homeobox protein PKNOX1	0.0540442	0.31002	1.3722
GO:0043410	positive regulation of MAPK cascade	Wwc1	Wwc1	Protein KIBRA	0.0560102	0.31002	2.04133
GO:0043410	positive regulation of MAPK cascade	Itgav	Itgav	Integrin alpha-V	0.0560102	0.31002	2.04133
GO:0043410	positive regulation of MAPK cascade	Cdc42	Cdc42	Cell division control protein 42 homolog	0.0560102	0.31002	2.04133
GO:0043410	positive regulation of MAPK cascade	Igf1r	Igf1r	Tyrosine-protein kinase receptor	0.0560102	0.31002	2.04133
GO:0043410	positive regulation of MAPK cascade	Prkce	Prkce	Protein kinase C epsilon type	0.0560102	0.31002	2.04133
GO:0043410	positive regulation of MAPK cascade	Fgf9	Fgf9	Fibroblast growth factor 9	0.0560102	0.31002	2.04133
GO:0043410	positive regulation of MAPK cascade	Igf2	Igf2	Insulin-like growth factor 2	0.0560102	0.31002	2.04133
GO:0021987	cerebral cortex development	Kif14	Kif14	Kinesin-like protein	0.0570676	0.31002	2.39543
GO:0021987	cerebral cortex development	Cep120	Cep120	Centrosomal protein of 120 kDa	0.0570676	0.31002	2.39543
GO:0021987	cerebral cortex development	Fat4	Fat4	Protocadherin Fat 4	0.0570676	0.31002	2.39543
GO:0021987	cerebral cortex development	Lhx2	Lhx2	LIM/homeobox protein Lhx2	0.0570676	0.31002	2.39543
GO:0021987	cerebral cortex development	Dab1	Dab1	Disabled homolog 1 (Drosophila), isoform CRA_a	0.0570676	0.31002	2.39543
GO:0042632	cholesterol homeostasis	Abcg8	Abcg8	ATP-binding cassette sub-family G member 8	0.0570676	0.31002	2.39543
GO:0042632	cholesterol homeostasis	Abca1	Abca1	ATP-binding cassette sub-family A member 1	0.0570676	0.31002	2.39543
GO:0042632	cholesterol homeostasis	Sirt1	Sirt1	Sirt1 protein	0.0570676	0.31002	2.39543
GO:0042632	cholesterol homeostasis	Xbp1	Xbp1	X-box-binding protein 1	0.0570676	0.31002	2.39543
GO:0042632	cholesterol homeostasis	Pla2g10	Pla2g10	Phospholipase A(2)	0.0570676	0.31002	2.39543
GO:0050804	regulation of synaptic transmission	Ppp3ca	Ppp3ca	Serine/threonine-protein phosphatase 2B catalytic subunit alpha isoform	0.058386	0.31002	3.35361
GO:0050804	regulation of synaptic transmission	Tnr	Tnr	Tenascin-R	0.058386	0.31002	3.35361
GO:0050804	regulation of synaptic transmission	Nlgn1	Nlgn1	Neuroligin-1	0.058386	0.31002	3.35361
GO:0014003	oligodendrocyte development	Tcf7l2	Tcf7l2	Transcription factor 7-like 2	0.058386	0.31002	3.35361
GO:0014003	oligodendrocyte development	Id2	Id2	DNA-binding protein inhibitor ID-2	0.058386	0.31002	3.35361
GO:0014003	oligodendrocyte development	Eif2b2	Eif2b2	Translation initiation factor eIF-2B subunit beta	0.058386	0.31002	3.35361
GO:0046580	negative regulation of Ras protein signal transduction	Rasal1	Rasal1	RasGAP-activating-like protein 1	0.058386	0.31002	3.35361
GO:0046580	negative regulation of Ras protein signal transduction	Spry2	Spry2	Sprouty homolog 2 (Drosophila)	0.058386	0.31002	3.35361
GO:0046580	negative regulation of Ras protein signal transduction	Dgkz	Dgkz	Diacylglycerol kinase zeta	0.058386	0.31002	3.35361
GO:0043044	ATP-dependent chromatin remodeling	Smarce1	Smarce1	Smarce1 variant 3	0.058386	0.31002	3.35361
GO:0043044	ATP-dependent chromatin remodeling	Smarcad1	Smarcad1	SWI/SNF-related matrix-associated actin-dependent regulator of chromatin subfamily A containing DEAD/H box 1	0.058386	0.31002	3.35361
GO:0043044	ATP-dependent chromatin remodeling	Mbd2	Mbd2	Methyl-CpG-binding domain protein 2	0.058386	0.31002	3.35361
GO:1902176	negative regulation of oxidative stress-induced intrinsic apoptotic signaling pathway	Sirt1	Sirt1	Sirt1 protein	0.0610651	0.31002	4.87797
GO:1902176	negative regulation of oxidative stress-induced intrinsic apoptotic signaling pathway	Bag5	Bag5	BAG family molecular chaperone regulator 5	0.0610651	0.31002	4.87797
GO:0045822	negative regulation of heart contraction	Pde4d	Pde4d	Phosphodiesterase 4D, cAMP specific	0.0610651	0.31002	4.87797
GO:0045822	negative regulation of heart contraction	Prkca	Prkca	Protein kinase C alpha type	0.0610651	0.31002	4.87797
GO:0006241	CTP biosynthetic process	Nme6	Nme6	Nucleoside diphosphate kinase 6	0.0610651	0.31002	4.87797
GO:0006241	CTP biosynthetic process	Nme4	Nme4	Nucleoside diphosphate kinase	0.0610651	0.31002	4.87797
GO:0006228	UTP biosynthetic process	Nme6	Nme6	Nucleoside diphosphate kinase 6	0.0610651	0.31002	4.87797
GO:0006228	UTP biosynthetic process	Nme4	Nme4	Nucleoside diphosphate kinase	0.0610651	0.31002	4.87797
GO:0046628	positive regulation of insulin receptor signaling pathway	Sirt1	Sirt1	Sirt1 protein	0.0610651	0.31002	4.87797
GO:0046628	positive regulation of insulin receptor signaling pathway	Igf2	Igf2	Insulin-like growth factor 2	0.0610651	0.31002	4.87797
GO:0006183	GTP biosynthetic process	Nme6	Nme6	Nucleoside diphosphate kinase 6	0.0610651	0.31002	4.87797
GO:0006183	GTP biosynthetic process	Nme4	Nme4	Nucleoside diphosphate kinase	0.0610651	0.31002	4.87797
GO:0050708	regulation of protein secretion	Pik3c3	Pik3c3	Phosphatidylinositol 3-kinase catalytic subunit type 3	0.0610651	0.31002	4.87797
GO:0050708	regulation of protein secretion	Dnajc1	Dnajc1	DnaJ homolog subfamily C member 1	0.0610651	0.31002	4.87797
GO:0010801	negative regulation of peptidyl-threonine phosphorylation	Spry2	Spry2	Sprouty homolog 2 (Drosophila)	0.0610651	0.31002	4.87797
GO:0010801	negative regulation of peptidyl-threonine phosphorylation	Pard3	Pard3	Par-3 (Partitioning defective 3) homolog (C. elegans)	0.0610651	0.31002	4.87797
GO:0045995	regulation of embryonic development	Nipbl	Nipbl	Nipbl protein	0.0610651	0.31002	4.87797
GO:0045995	regulation of embryonic development	Lama3	Lama3	Putative uncharacterized protein	0.0610651	0.31002	4.87797
GO:0060740	prostate gland epithelium morphogenesis	Esr2	Esr2	Estrogen receptor beta	0.0610651	0.31002	4.87797
GO:0060740	prostate gland epithelium morphogenesis	Igf1r	Igf1r	Tyrosine-protein kinase receptor	0.0610651	0.31002	4.87797
GO:1900006	positive regulation of dendrite development	Opa1	Opa1	Dynamin-like 120 kDa protein, mitochondrial	0.0610651	0.31002	4.87797
GO:1900006	positive regulation of dendrite development	Elavl4	Elavl4	ELAV-like protein 4	0.0610651	0.31002	4.87797
GO:0032330	regulation of chondrocyte differentiation	Trps1	Trps1	Trichorhinophalangeal syndrome I (Human), isoform CRA_b	0.0610651	0.31002	4.87797
GO:0032330	regulation of chondrocyte differentiation	Shox2	Shox2	Short stature homeobox protein 2	0.0610651	0.31002	4.87797
GO:0048711	positive regulation of astrocyte differentiation	Il6st	Il6st	Interleukin-6 signal transductor	0.0610651	0.31002	4.87797
GO:0048711	positive regulation of astrocyte differentiation	Id2	Id2	DNA-binding protein inhibitor ID-2	0.0610651	0.31002	4.87797
GO:0006470	protein dephosphorylation	Ppp3ca	Ppp3ca	Serine/threonine-protein phosphatase 2B catalytic subunit alpha isoform	0.06345	0.31002	1.80194
GO:0006470	protein dephosphorylation	Ssh1	Ssh1	Protein phosphatase Slingshot homolog 1	0.06345	0.31002	1.80194
GO:0006470	protein dephosphorylation	Cdc14a	Cdc14a	Dual specificity protein phosphatase CDC14A	0.06345	0.31002	1.80194
GO:0006470	protein dephosphorylation	Timm50	Timm50	Putative uncharacterized protein	0.06345	0.31002	1.80194
GO:0006470	protein dephosphorylation	Dusp3	Dusp3	Dual-specificity protein phosphatase 3	0.06345	0.31002	1.80194
GO:0006470	protein dephosphorylation	Ptpn22	Ptpn22	Protein-tyrosine-phosphatase	0.06345	0.31002	1.80194
GO:0006470	protein dephosphorylation	Styxl1	Styxl1	Protein Styxl1	0.06345	0.31002	1.80194
GO:0006470	protein dephosphorylation	Dusp4	Dusp4	Dual specificity protein phosphatase 4	0.06345	0.31002	1.80194
GO:0006470	protein dephosphorylation	Ptpro	Ptpro	Protein-tyrosine-phosphatase	0.06345	0.31002	1.80194
GO:0032880	regulation of protein localization	Slc26a4	Slc26a4	Solute carrier family 26, member 4	0.0645123	0.31002	2.31283
GO:0032880	regulation of protein localization	Cep120	Cep120	Centrosomal protein of 120 kDa	0.0645123	0.31002	2.31283
GO:0032880	regulation of protein localization	Six1	Six1	Putative uncharacterized protein	0.0645123	0.31002	2.31283
GO:0032880	regulation of protein localization	Sgk1	Sgk1	Serine/threonine-protein kinase Sgk1	0.0645123	0.31002	2.31283
GO:0032880	regulation of protein localization	Ddx4	Ddx4	DEAD box polypeptide 4	0.0645123	0.31002	2.31283
GO:0001816	cytokine production	Cd4	Cd4	T4 surface glycoprotein	0.0645771	0.31002	3.21946
GO:0001816	cytokine production	S1pr3	S1pr3	Sphingosine 1-phosphate receptor 3	0.0645771	0.31002	3.21946
GO:0001816	cytokine production	Tnfsf4	Tnfsf4	Tumor necrosis factor (Ligand) superfamily member 4	0.0645771	0.31002	3.21946
GO:2000378	negative regulation of reactive oxygen species metabolic process	Esr2	Esr2	Estrogen receptor beta	0.0645771	0.31002	3.21946
GO:2000378	negative regulation of reactive oxygen species metabolic process	Mycn	Mycn	N-myc proto-oncogene protein	0.0645771	0.31002	3.21946
GO:2000378	negative regulation of reactive oxygen species metabolic process	Map3k7	Map3k7	Mitogen-activated protein kinase kinase kinase 7	0.0645771	0.31002	3.21946
GO:0043001	Golgi to plasma membrane protein transport	Golga7	Golga7	Golgin subfamily A member 7	0.0645771	0.31002	3.21946
GO:0043001	Golgi to plasma membrane protein transport	Kif13a	Kif13a	Kinesin-like protein	0.0645771	0.31002	3.21946
GO:0043001	Golgi to plasma membrane protein transport	Ank3	Ank3	Ankyrin-3	0.0645771	0.31002	3.21946
GO:0001764	neuron migration	Mnx1	Mnx1	Homeobox gene HB9	0.0657982	0.31002	1.86635
GO:0001764	neuron migration	Sema3a	Sema3a	Semaphorin-3A	0.0657982	0.31002	1.86635
GO:0001764	neuron migration	Esr2	Esr2	Estrogen receptor beta	0.0657982	0.31002	1.86635
GO:0001764	neuron migration	Barhl2	Barhl2	Barhl2 protein	0.0657982	0.31002	1.86635
GO:0001764	neuron migration	Disc1	Disc1	Disrupted in schizophrenia 1 homolog	0.0657982	0.31002	1.86635
GO:0001764	neuron migration	Mdga1	Mdga1	MAM domain-containing glycosylphosphatidylinositol anchor protein 1	0.0657982	0.31002	1.86635
GO:0001764	neuron migration	Dab1	Dab1	Disabled homolog 1 (Drosophila), isoform CRA_a	0.0657982	0.31002	1.86635
GO:0001764	neuron migration	Chl1	Chl1	Neural cell adhesion molecule L1-like protein	0.0657982	0.31002	1.86635
GO:0030182	neuron differentiation	Mnx1	Mnx1	Homeobox gene HB9	0.0657982	0.31002	1.86635
GO:0030182	neuron differentiation	Gfra1	Gfra1	Glial cell line derived neurotrophic factor family receptor alpha 1	0.0657982	0.31002	1.86635
GO:0030182	neuron differentiation	Tbr1	Tbr1	T-box brain protein 1	0.0657982	0.31002	1.86635
GO:0030182	neuron differentiation	Barhl2	Barhl2	Barhl2 protein	0.0657982	0.31002	1.86635
GO:0030182	neuron differentiation	Wnt2	Wnt2	Protein Wnt-2	0.0657982	0.31002	1.86635
GO:0030182	neuron differentiation	Rtn1	Rtn1	Reticulon-1	0.0657982	0.31002	1.86635
GO:0030182	neuron differentiation	Psd3	Psd3	PH and SEC7 domain-containing protein 3	0.0657982	0.31002	1.86635
GO:0030182	neuron differentiation	Lhx2	Lhx2	LIM/homeobox protein Lhx2	0.0657982	0.31002	1.86635
GO:2001237	negative regulation of extrinsic apoptotic signaling pathway	Tcf7l2	Tcf7l2	Transcription factor 7-like 2	0.0702733	0.31002	2.55513
GO:2001237	negative regulation of extrinsic apoptotic signaling pathway	Itgav	Itgav	Integrin alpha-V	0.0702733	0.31002	2.55513
GO:2001237	negative regulation of extrinsic apoptotic signaling pathway	Siah2	Siah2	E3 ubiquitin-protein ligase SIAH2	0.0702733	0.31002	2.55513
GO:2001237	negative regulation of extrinsic apoptotic signaling pathway	Tnfsf4	Tnfsf4	Tumor necrosis factor (Ligand) superfamily member 4	0.0702733	0.31002	2.55513
GO:0007010	cytoskeleton organization	Larp4	Larp4	La-related protein 4	0.0703418	0.31002	1.9361
GO:0007010	cytoskeleton organization	Arhgap10	Arhgap10	Rho GTPase-activating protein 10	0.0703418	0.31002	1.9361
GO:0007010	cytoskeleton organization	Dst	Dst	Dystonin	0.0703418	0.31002	1.9361
GO:0007010	cytoskeleton organization	Dlc1	Dlc1	A730069N07Rik/deleted in liver cancer 1 fusion protein	0.0703418	0.31002	1.9361
GO:0007010	cytoskeleton organization	Zak	Zak	Mitogen-activated protein kinase kinase kinase MLT	0.0703418	0.31002	1.9361
GO:0007010	cytoskeleton organization	Ablim1	Ablim1	Ablim1 protein	0.0703418	0.31002	1.9361
GO:0007010	cytoskeleton organization	Pacsin2	Pacsin2	Protein kinase C and casein kinase substrate in neurons 2, isoform CRA_a	0.0703418	0.31002	1.9361
GO:0000226	microtubule cytoskeleton organization	Gas2l3	Gas2l3	Putative uncharacterized protein	0.0707471	0.31002	2.06376
GO:0000226	microtubule cytoskeleton organization	Eml1	Eml1	Echinoderm microtubule associated protein-like protein 1	0.0707471	0.31002	2.06376
GO:0000226	microtubule cytoskeleton organization	Cep120	Cep120	Centrosomal protein of 120 kDa	0.0707471	0.31002	2.06376
GO:0000226	microtubule cytoskeleton organization	Disc1	Disc1	Disrupted in schizophrenia 1 homolog	0.0707471	0.31002	2.06376
GO:0000226	microtubule cytoskeleton organization	Camsap2	Camsap2	Calmodulin-regulated spectrin-associated protein 2	0.0707471	0.31002	2.06376
GO:0000226	microtubule cytoskeleton organization	Pard3	Pard3	Par-3 (Partitioning defective 3) homolog (C. elegans)	0.0707471	0.31002	2.06376
GO:0061098	positive regulation of protein tyrosine kinase activity	Nrg1	Nrg1	Type III neuregulin 1	0.0710563	0.31002	3.09564
GO:0061098	positive regulation of protein tyrosine kinase activity	Ercc6	Ercc6	Ercc6 protein	0.0710563	0.31002	3.09564
GO:0061098	positive regulation of protein tyrosine kinase activity	Ace	Ace	Angiotensin-converting enzyme	0.0710563	0.31002	3.09564
GO:0018022	peptidyl-lysine methylation	Camkmt	Camkmt	Uncharacterized protein	0.0710563	0.31002	3.09564
GO:0018022	peptidyl-lysine methylation	Setdb2	Setdb2	Histone-lysine N-methyltransferase SETDB2	0.0710563	0.31002	3.09564
GO:0018022	peptidyl-lysine methylation	Suv39h2	Suv39h2	Histone-lysine N-methyltransferase SUV39H2	0.0710563	0.31002	3.09564
GO:0006928	cellular component movement	Wasf2	Wasf2	Wiskott-Aldrich syndrome protein family member 2	0.0710563	0.31002	3.09564
GO:0006928	cellular component movement	Strbp	Strbp	Spermatid perinuclear RNA-binding protein	0.0710563	0.31002	3.09564
GO:0006928	cellular component movement	Akap11	Akap11	Protein Akap11	0.0710563	0.31002	3.09564
GO:0050771	negative regulation of axonogenesis	Mbp	Mbp	Myelin basic protein	0.0715139	0.31002	4.47148
GO:0050771	negative regulation of axonogenesis	Dab1	Dab1	Disabled homolog 1 (Drosophila), isoform CRA_a	0.0715139	0.31002	4.47148
GO:2000178	negative regulation of neural precursor cell proliferation	Id2	Id2	DNA-binding protein inhibitor ID-2	0.0715139	0.31002	4.47148
GO:2000178	negative regulation of neural precursor cell proliferation	Kdm2b	Kdm2b	Lysine-specific demethylase 2B	0.0715139	0.31002	4.47148
[truncated: 4,497 more rows]

## Sheet: DownGene2GO
QueryID	QuerySymbol	Description	GOID	GOTerm	P-Value	Enrichment
[truncated: 6,051 more rows]

## Sheet: UpGO_Result
GOID	GOTerm	DifGene	AllDifGene	GeneInGO	AllGene	P-Value	FDR	Enrichment	(-log10P)
[truncated: 2,220 more rows]

[truncated: 2 more sheets: UpGO2Gene, UpGene2GO]
