# Supplementary material for: Autism-like behaviors and abnormality of glucose metabolism in offspring derived from aging males with epigenetically modified sperm
Source: Aging (Albany NY). 2020 Oct 13;12(19):19766–84. doi: 10.18632/aging.104061 (PMC7732289; doi:10.18632/aging.104061)
Supplement: Supplementary Table 4 [file aging-12-104061-s005..xlsx]

## Sheet: DownPathway_Result
PathwayID	PathwayTerm	DifGene	AllDifGene	GeneInPathway	AllGene	P-Value	FDR	Enrichment	(-log10P)
PATH:04520	Adherens junction	9	288	71	7565	0.00138713	0.137941	3.32967	2.85788	0.860306
PATH:04530	Tight junction	13	288	135	7565	0.00182761	0.137941	2.52945	2.73812	0.860306
PATH:05032	Morphine addiction	10	288	92	7565	0.00249349	0.137941	2.85515	2.60319	0.860306
PATH:04010	MAPK signaling pathway	20	288	271	7565	0.00339727	0.137941	1.93855	2.46887	0.860306
PATH:04070	Phosphatidylinositol signaling system	9	288	81	7565	0.00348967	0.137941	2.9186	2.45722	0.860306
PATH:04015	Rap1 signaling pathway	17	288	216	7565	0.0035219	0.137941	2.06734	2.45322	0.860306
PATH:05202	Transcriptional misregulation in cancer	14	288	179	7565	0.00821185	0.275684	2.05443	2.08556	0.559589
PATH:04660	T cell receptor signaling pathway	10	288	111	7565	0.00947948	0.27846	2.36643	2.02322	0.555237
PATH:04360	Axon guidance	11	288	134	7565	0.0129914	0.302887	2.15628	1.88634	0.518719
PATH:05203	Viral carcinogenesis	16	288	228	7565	0.0132559	0.302887	1.84332	1.87759	0.518719
PATH:04390	Hippo signaling pathway	12	288	154	7565	0.0142745	0.302887	2.04681	1.84544	0.518719
PATH:05031	Amphetamine addiction	7	288	69	7565	0.0154666	0.302887	2.6648	1.81061	0.518719
PATH:04310	Wnt signaling pathway	12	288	158	7565	0.017184	0.310633	1.99499	1.76488	0.507752
PATH:05205	Proteoglycans in cancer	15	288	226	7565	0.0254151	0.338159	1.74341	1.59491	0.470879
PATH:05200	Pathways in cancer	20	288	329	7565	0.0256076	0.338159	1.5968	1.59163	0.470879
PATH:04973	Carbohydrate digestion and absorption	5	288	45	7565	0.0271962	0.338159	2.9186	1.56549	0.470879
PATH:00562	Inositol phosphate metabolism	6	288	61	7565	0.0277891	0.338159	2.58367	1.55613	0.470879
PATH:04725	Cholinergic synapse	9	288	113	7565	0.0279559	0.338159	2.09209	1.55353	0.470879
PATH:04370	VEGF signaling pathway	7	288	78	7565	0.0284294	0.338159	2.35733	1.54623	0.470879
PATH:02010	ABC transporters	5	288	46	7565	0.0295968	0.338159	2.85515	1.52875	0.470879
PATH:05100	Bacterial invasion of epithelial cells	7	288	79	7565	0.0302185	0.338159	2.32749	1.51973	0.470879
PATH:04915	Estrogen signaling pathway	8	288	98	7565	0.0327268	0.344097	2.14427	1.4851	0.46332
PATH:00670	One carbon pool by folate	3	288	19	7565	0.0336775	0.344097	4.14748	1.47266	0.46332
PATH:05146	Amoebiasis	9	288	119	7565	0.037271	0.364946	1.98661	1.42863	0.437772
PATH:05210	Colorectal cancer	6	288	66	7565	0.0389141	0.365793	2.38794	1.40989	0.436765
PATH:04666	Fc gamma R-mediated phagocytosis	7	288	88	7565	0.0497844	0.430057	2.08945	1.30291	0.366474
PATH:04014	Ras signaling pathway	14	288	228	7565	0.0524839	0.430057	1.61291	1.27997	0.366474
PATH:04380	Osteoclast differentiation	9	288	127	7565	0.0527148	0.430057	1.86147	1.27807	0.366474
PATH:04510	Focal adhesion	13	288	208	7565	0.053775	0.430057	1.64171	1.26942	0.366474
PATH:04724	Glutamatergic synapse	9	288	128	7565	0.0549008	0.430057	1.84692	1.26042	0.366474
PATH:04270	Vascular smooth muscle contraction	9	288	129	7565	0.0571451	0.433197	1.83261	1.24302	0.363315
PATH:04114	Oocyte meiosis	8	288	112	7565	0.0631886	0.464041	1.87624	1.19936	0.333443
PATH:04662	B cell receptor signaling pathway	6	288	77	7565	0.0722752	0.514687	2.04681	1.14101	0.288457
PATH:04921	Oxytocin signaling pathway	10	288	158	7565	0.0787806	0.520173	1.66249	1.10358	0.283852
PATH:04713	Circadian entrainment	7	288	98	7565	0.0792663	0.520173	1.87624	1.10091	0.283852
PATH:05132	Salmonella infection	6	288	79	7565	0.0796861	0.520173	1.99499	1.09862	0.283852
PATH:04670	Leukocyte transendothelial migration	8	288	120	7565	0.0866224	0.550169	1.75116	1.06237	0.259504
PATH:04912	GnRH signaling pathway	7	288	101	7565	0.0897393	0.554967	1.82051	1.04702	0.255733
PATH:05142	Chagas disease (American trypanosomiasis)	7	288	103	7565	0.0971352	0.561417	1.78516	1.01262	0.250714
PATH:04723	Retrograde endocannabinoid signaling	7	288	103	7565	0.0971352	0.561417	1.78516	1.01262	0.250714
PATH:05140	Leishmaniasis	5	288	65	7565	0.100639	0.561417	2.02057	0.997233	0.250714
PATH:04150	mTOR signaling pathway	5	288	65	7565	0.100639	0.561417	2.02057	0.997233	0.250714
PATH:04110	Cell cycle	8	288	126	7565	0.107128	0.561417	1.66777	0.970099	0.250714
PATH:00520	Amino sugar and nucleotide sugar metabolism	4	288	48	7565	0.108746	0.561417	2.18895	0.963587	0.250714
PATH:04914	Progesterone-mediated oocyte maturation	6	288	86	7565	0.108824	0.561417	1.83261	0.963274	0.250714
PATH:04012	ErbB signaling pathway	6	288	87	7565	0.113382	0.561417	1.81154	0.945455	0.250714
PATH:04022	cGMP-PKG signaling pathway	10	288	170	7565	0.113573	0.561417	1.54514	0.944724	0.250714
PATH:00052	Galactose metabolism	3	288	32	7565	0.120714	0.561417	2.46257	0.918242	0.250714
PATH:04930	Type II diabetes mellitus	4	288	50	7565	0.121555	0.561417	2.10139	0.915227	0.250714
PATH:04720	Long-term potentiation	5	288	69	7565	0.121607	0.561417	1.90343	0.91504	0.250714
PATH:05212	Pancreatic cancer	5	288	70	7565	0.127146	0.561417	1.87624	0.895697	0.250714
PATH:00561	Glycerolipid metabolism	4	288	51	7565	0.128192	0.561417	2.06019	0.892139	0.250714
PATH:05218	Melanoma	5	288	71	7565	0.132799	0.561417	1.84981	0.876806	0.250714
PATH:04728	Dopaminergic synapse	8	288	133	7565	0.134135	0.561417	1.57999	0.872457	0.250714
PATH:04144	Endocytosis	12	288	221	7565	0.136617	0.561417	1.42628	0.864496	0.250714
PATH:00230	Purine metabolism	10	288	177	7565	0.137316	0.561417	1.48403	0.86228	0.250714
PATH:05143	African trypanosomiasis	3	288	34	7565	0.137997	0.561417	2.31771	0.86013	0.250714
PATH:05211	Renal cell carcinoma	5	288	72	7565	0.138563	0.561417	1.82412	0.858354	0.250714
PATH:05220	Chronic myeloid leukemia	5	288	73	7565	0.144435	0.575292	1.79913	0.840328	0.240112
PATH:04730	Long-term depression	5	288	74	7565	0.150413	0.589118	1.77482	0.822714	0.229797
PATH:05223	Non-small cell lung cancer	4	288	56	7565	0.163497	0.620787	1.87624	0.786491	0.207057
PATH:04120	Ubiquitin mediated proteolysis	8	288	140	7565	0.164273	0.620787	1.50099	0.784435	0.207057
PATH:05221	Acute myeloid leukemia	4	288	57	7565	0.170945	0.620787	1.84332	0.767143	0.207057
PATH:04020	Calcium signaling pathway	10	288	186	7565	0.171365	0.620787	1.41222	0.766079	0.207057
PATH:04614	Renin-angiotensin system	2	288	20	7565	0.175551	0.620787	2.62674	0.755596	0.207057
PATH:00524	Butirosin and neomycin biosynthesis	1	288	5	7565	0.176441	0.620787	5.25347	0.753399	0.207057
PATH:05166	HTLV-I infection	14	288	280	7565	0.180319	0.620787	1.31337	0.743958	0.207057
PATH:04916	Melanogenesis	6	288	100	7565	0.180779	0.620787	1.57604	0.742853	0.207057
PATH:04080	Neuroactive ligand-receptor interaction	14	288	282	7565	0.187052	0.620787	1.30405	0.728037	0.207057
PATH:04726	Serotonergic synapse	8	288	145	7565	0.187557	0.620787	1.44923	0.726867	0.207057
PATH:05161	Hepatitis B	8	288	145	7565	0.187557	0.620787	1.44923	0.726867	0.207057
PATH:03008	Ribosome biogenesis in eukaryotes	5	288	82	7565	0.201683	0.633383	1.60167	0.69533	0.198334
PATH:00900	Terpenoid backbone biosynthesis	2	288	22	7565	0.203445	0.633383	2.38794	0.691554	0.198334
PATH:04664	Fc epsilon RI signaling pathway	5	288	83	7565	0.208475	0.633383	1.58237	0.680946	0.198334
PATH:04975	Fat digestion and absorption	3	288	42	7565	0.213976	0.633383	1.87624	0.669634	0.198334
PATH:05410	Hypertrophic cardiomyopathy (HCM)	5	288	84	7565	0.215341	0.633383	1.56353	0.666874	0.198334
PATH:04810	Regulation of actin cytoskeleton	11	288	220	7565	0.216904	0.633383	1.31337	0.663732	0.198334
PATH:04261	Adrenergic signaling in cardiomyocytes	8	288	151	7565	0.217226	0.633383	1.39165	0.663088	0.198334
PATH:05145	Toxoplasmosis	7	288	131	7565	0.231668	0.633383	1.4036	0.635133	0.198334
PATH:04962	Vasopressin-regulated water reabsorption	3	288	44	7565	0.234218	0.633383	1.79096	0.63038	0.198334
PATH:04960	Aldosterone-regulated sodium reabsorption	3	288	44	7565	0.234218	0.633383	1.79096	0.63038	0.198334
PATH:03420	Nucleotide excision repair	3	288	44	7565	0.234218	0.633383	1.79096	0.63038	0.198334
PATH:05214	Glioma	4	288	65	7565	0.234251	0.633383	1.61645	0.630318	0.198334
PATH:04911	Insulin secretion	5	288	87	7565	0.236347	0.633383	1.50962	0.62645	0.198334
PATH:04210	Apoptosis	5	288	87	7565	0.236347	0.633383	1.50962	0.62645	0.198334
PATH:04066	HIF-1 signaling pathway	6	288	110	7565	0.241202	0.633383	1.43277	0.617619	0.198334
PATH:00564	Glycerophospholipid metabolism	5	288	88	7565	0.243474	0.633383	1.49246	0.613548	0.198334
PATH:04540	Gap junction	5	288	88	7565	0.243474	0.633383	1.49246	0.613548	0.198334
PATH:00592	alpha-Linolenic acid metabolism	2	288	25	7565	0.246049	0.633383	2.10139	0.608979	0.198334
PATH:04727	GABAergic synapse	5	288	89	7565	0.250658	0.633383	1.47569	0.600919	0.198334
PATH:05222	Small cell lung cancer	5	288	89	7565	0.250658	0.633383	1.47569	0.600919	0.198334
PATH:05414	Dilated cardiomyopathy	5	288	89	7565	0.250658	0.633383	1.47569	0.600919	0.198334
PATH:04350	TGF-beta signaling pathway	5	288	89	7565	0.250658	0.633383	1.47569	0.600919	0.198334
PATH:03022	Basal transcription factors	3	288	46	7565	0.254782	0.636955	1.71309	0.593831	0.195891
PATH:04622	RIG-I-like receptor signaling pathway	4	288	68	7565	0.259324	0.641487	1.54514	0.586157	0.192812
PATH:04918	Thyroid hormone synthesis	4	288	71	7565	0.284892	0.69302	1.47985	0.545319	0.159254
PATH:04330	Notch signaling pathway	3	288	49	7565	0.286055	0.69302	1.60821	0.54355	0.159254
PATH:04919	Thyroid hormone signaling pathway	6	288	118	7565	0.293277	0.693174	1.33563	0.532722	0.159158
PATH:04976	Bile secretion	4	288	72	7565	0.2935	0.693174	1.4593	0.532392	0.159158
PATH:00232	Caffeine metabolism	1	288	9	7565	0.294968	0.693174	2.9186	0.530226	0.159158
PATH:04917	Prolactin signaling pathway	4	288	74	7565	0.310812	0.710852	1.41986	0.507503	0.148221
PATH:05412	Arrhythmogenic right ventricular cardiomyopathy (ARVC)	4	288	74	7565	0.310812	0.710852	1.41986	0.507503	0.148221
PATH:04650	Natural killer cell mediated cytotoxicity	6	288	121	7565	0.313386	0.710852	1.30251	0.50392	0.148221
PATH:05216	Thyroid cancer	2	288	30	7565	0.317405	0.710852	1.75116	0.498387	0.148221
PATH:05213	Endometrial cancer	3	288	52	7565	0.317615	0.710852	1.51542	0.498099	0.148221
PATH:00130	Ubiquinone and other terpenoid-quinone biosynthesis	1	288	10	7565	0.32184	0.713513	2.62674	0.49236	0.146598
PATH:00500	Starch and sucrose metabolism	3	288	53	7565	0.328157	0.71364	1.48683	0.483918	0.146521
PATH:05322	Systemic lupus erythematosus	7	288	148	7565	0.333381	0.71364	1.24238	0.477059	0.146521
PATH:04970	Salivary secretion	4	288	77	7565	0.336945	0.71364	1.36454	0.472441	0.146521
PATH:04340	Hedgehog signaling pathway	3	288	54	7565	0.338698	0.71364	1.4593	0.470188	0.146521
PATH:04620	Toll-like receptor signaling pathway	5	288	101	7565	0.340049	0.71364	1.30036	0.468458	0.146521
PATH:00020	Citrate cycle (TCA cycle)	2	288	32	7565	0.345598	0.71364	1.64171	0.461428	0.146521
PATH:04750	Inflammatory mediator regulation of TRP channels	6	288	126	7565	0.347355	0.71364	1.25083	0.459227	0.146521
PATH:04961	Endocrine and other factor-regulated calcium reabsorption	3	288	55	7565	0.349228	0.71364	1.43277	0.456891	0.146521
PATH:05217	Basal cell carcinoma	3	288	55	7565	0.349228	0.71364	1.43277	0.456891	0.146521
PATH:05152	Tuberculosis	8	288	178	7565	0.36687	0.739637	1.18056	0.435488	0.130981
PATH:04932	Non-alcoholic fatty liver disease (NAFLD)	7	288	154	7565	0.370916	0.739637	1.19397	0.430724	0.130981
PATH:05010	Alzheimer's disease	8	288	179	7565	0.372701	0.739637	1.17396	0.428639	0.130981
PATH:04146	Peroxisome	4	288	82	7565	0.38063	0.739637	1.28133	0.419496	0.130981
PATH:04611	Platelet activation	6	288	131	7565	0.381639	0.739637	1.20309	0.418347	0.130981
PATH:04630	Jak-STAT signaling pathway	7	288	156	7565	0.383501	0.739637	1.17866	0.416234	0.130981
PATH:04972	Pancreatic secretion	5	288	107	7565	0.385823	0.739637	1.22745	0.413612	0.130981
PATH:05340	Primary immunodeficiency	2	288	35	7565	0.387129	0.739637	1.50099	0.412144	0.130981
PATH:00790	Folate biosynthesis	1	288	13	7565	0.396486	0.742149	2.02057	0.401772	0.129509
PATH:03450	Non-homologous end-joining	1	288	13	7565	0.396486	0.742149	2.02057	0.401772	0.129509
PATH:05323	Rheumatoid arthritis	4	288	84	7565	0.398048	0.742149	1.25083	0.400065	0.129509
PATH:04668	TNF signaling pathway	5	288	109	7565	0.401076	0.742149	1.20492	0.396773	0.129509
PATH:04722	Neurotrophin signaling pathway	6	288	135	7565	0.409111	0.745279	1.16744	0.388159	0.127681
PATH:04068	FoxO signaling pathway	6	288	135	7565	0.409111	0.745279	1.16744	0.388159	0.127681
PATH:05162	Measles	6	288	137	7565	0.422815	0.76432	1.1504	0.373849	0.116725
PATH:00565	Ether lipid metabolism	2	288	38	7565	0.427469	0.766834	1.38249	0.369095	0.115299
PATH:05215	Prostate cancer	4	288	89	7565	0.441171	0.780345	1.18056	0.355393	0.107713
PATH:00604	Glycosphingolipid biosynthesis - ganglio series	1	288	15	7565	0.441642	0.780345	1.75116	0.35493	0.107713
PATH:00983	Drug metabolism - other enzymes	3	288	65	7565	0.452507	0.783758	1.21234	0.344375	0.105818
PATH:05206	MicroRNAs in cancer	11	288	270	7565	0.453026	0.783758	1.07015	0.343877	0.105818
PATH:05033	Nicotine addiction	2	288	40	7565	0.453579	0.783758	1.31337	0.343347	0.105818
PATH:04910	Insulin signaling pathway	6	288	143	7565	0.46362	0.791078	1.10213	0.333838	0.101781
PATH:05204	Chemical carcinogenesis	4	288	92	7565	0.466618	0.791078	1.14206	0.331038	0.101781
PATH:05164	Influenza A	7	288	170	7565	0.47128	0.791078	1.0816	0.326721	0.101781
PATH:03013	RNA transport	7	288	170	7565	0.47128	0.791078	1.0816	0.326721	0.101781
PATH:00920	Sulfur metabolism	1	288	17	7565	0.48343	0.805717	1.54514	0.315666	0.0938175
PATH:04145	Phagosome	7	288	173	7565	0.489779	0.807596	1.06284	0.31	0.0928058
PATH:03015	mRNA surveillance pathway	4	288	95	7565	0.491643	0.807596	1.10599	0.30835	0.0928058
PATH:04062	Chemokine signaling pathway	8	288	200	7565	0.494867	0.807596	1.05069	0.305511	0.0928058
PATH:01210	2-Oxocarboxylic acid metabolism	1	288	19	7565	0.522101	0.846163	1.38249	0.282246	0.0725457
PATH:04672	Intestinal immune network for IgA production	2	288	46	7565	0.527601	0.846912	1.14206	0.277694	0.0721615
PATH:04514	Cell adhesion molecules (CAMs)	6	288	153	7565	0.529771	0.846912	1.03009	0.275912	0.0721615
PATH:04971	Gastric acid secretion	3	288	74	7565	0.539325	0.850613	1.06489	0.26815	0.0702679
PATH:05133	Pertussis	3	288	74	7565	0.539325	0.850613	1.06489	0.26815	0.0702679
PATH:00071	Fatty acid degradation	2	288	48	7565	0.55073	0.86281	1.09447	0.259062	0.0640849
PATH:00514	Other types of O-glycan biosynthesis	2	288	49	7565	0.561992	0.871417	1.07214	0.25027	0.0597742
PATH:00310	Lysine degradation	2	288	50	7565	0.573052	0.871417	1.05069	0.241806	0.0597742
PATH:00510	N-Glycan biosynthesis	2	288	50	7565	0.573052	0.871417	1.05069	0.241806	0.0597742
PATH:04964	Proximal tubule bicarbonate reclamation	1	288	22	7565	0.574764	0.871417	1.19397	0.24051	0.0597742
PATH:00532	Glycosaminoglycan biosynthesis - chondroitin sulfate / dermatan sulfate	1	288	22	7565	0.574764	0.871417	1.19397	0.24051	0.0597742
PATH:00240	Pyrimidine metabolism	4	288	106	7565	0.578707	0.871771	0.991221	0.237541	0.0595978
PATH:05150	Staphylococcus aureus infection	2	288	51	7565	0.583908	0.874003	1.03009	0.233655	0.0584871
PATH:05330	Allograft rejection	2	288	52	7565	0.59456	0.878752	1.01028	0.225804	0.0561335
PATH:00591	Linoleic acid metabolism	2	288	52	7565	0.59456	0.878752	1.01028	0.225804	0.0561335
PATH:03018	RNA degradation	3	288	81	7565	0.601125	0.882902	0.972865	0.221035	0.0540873
PATH:00601	Glycosphingolipid biosynthesis - lacto and neolacto series	1	288	24	7565	0.606618	0.885437	1.09447	0.217085	0.0528425
PATH:00563	Glycosylphosphatidylinositol(GPI)-anchor biosynthesis	1	288	25	7565	0.621642	0.892578	1.05069	0.20646	0.0493537
PATH:01040	Biosynthesis of unsaturated fatty acids	1	288	25	7565	0.621642	0.892578	1.05069	0.20646	0.0493537
PATH:04141	Protein processing in endoplasmic reticulum	6	288	169	7565	0.627756	0.892578	0.932569	0.202209	0.0493537
PATH:00190	Oxidative phosphorylation	5	288	141	7565	0.627876	0.892578	0.931467	0.202126	0.0493537
PATH:05014	Amyotrophic lateral sclerosis (ALS)	2	288	56	7565	0.635124	0.892578	0.93812	0.197142	0.0493537
PATH:04950	Maturity onset diabetes of the young	1	288	26	7565	0.636094	0.892578	1.01028	0.196479	0.0493537
PATH:04966	Collecting duct acid secretion	1	288	27	7565	0.649996	0.892578	0.972865	0.18709	0.0493537
PATH:03060	Protein export	1	288	27	7565	0.649996	0.892578	0.972865	0.18709	0.0493537
PATH:04913	Ovarian steroidogenesis	2	288	58	7565	0.654187	0.892578	0.905771	0.184298	0.0493537
PATH:00340	Histidine metabolism	1	288	28	7565	0.663368	0.892578	0.93812	0.178246	0.0493537
PATH:00512	Mucin type O-Glycan biosynthesis	1	288	28	7565	0.663368	0.892578	0.93812	0.178246	0.0493537
PATH:04940	Type I diabetes mellitus	2	288	59	7565	0.663418	0.892578	0.890419	0.178213	0.0493537
PATH:05321	Inflammatory bowel disease (IBD)	2	288	59	7565	0.663418	0.892578	0.890419	0.178213	0.0493537
PATH:04512	ECM-receptor interaction	3	288	90	7565	0.672199	0.892578	0.875579	0.172502	0.0493537
PATH:00030	Pentose phosphate pathway	1	288	29	7565	0.676231	0.892578	0.905771	0.169905	0.0493537
PATH:04621	NOD-like receptor signaling pathway	2	288	61	7565	0.681286	0.892578	0.861225	0.166671	0.0493537
PATH:04060	Cytokine-cytokine receptor interaction	9	288	264	7565	0.681337	0.892578	0.895478	0.166638	0.0493537
PATH:04151	PI3K-Akt signaling pathway	12	288	350	7565	0.688585	0.892578	0.900595	0.162043	0.0493537
PATH:00450	Selenocompound metabolism	1	288	30	7565	0.688605	0.892578	0.875579	0.16203	0.0493537
PATH:00630	Glyoxylate and dicarboxylate metabolism	1	288	30	7565	0.688605	0.892578	0.875579	0.16203	0.0493537
PATH:00010	Glycolysis / Gluconeogenesis	2	288	63	7565	0.698373	0.892578	0.833884	0.155913	0.0493537
PATH:04742	Taste transduction	2	288	63	7565	0.698373	0.892578	0.833884	0.155913	0.0493537
PATH:05169	Epstein-Barr virus infection	7	288	211	7565	0.69887	0.892578	0.871429	0.155604	0.0493537
PATH:03010	Ribosome	5	288	154	7565	0.703885	0.894124	0.852836	0.152499	0.0486024
PATH:00980	Metabolism of xenobiotics by cytochrome P450	3	288	96	7565	0.714174	0.902316	0.820855	0.146196	0.0446413
PATH:00982	Drug metabolism - cytochrome P450	3	288	98	7565	0.727212	0.913876	0.804103	0.138339	0.0391126
PATH:00040	Pentose and glucuronate interconversions	1	288	34	7565	0.733561	0.915085	0.772569	0.134564	0.0385387
PATH:04115	p53 signaling pathway	2	288	68	7565	0.73779	0.915085	0.772569	0.132067	0.0385387
PATH:05020	Prion diseases	1	288	35	7565	0.74375	0.915085	0.750496	0.128573	0.0385387
PATH:04130	SNARE interactions in vesicular transport	1	288	35	7565	0.74375	0.915085	0.750496	0.128573	0.0385387
PATH:03410	Base excision repair	1	288	37	7565	0.762978	0.933853	0.709929	0.117488	0.0297215
PATH:03040	Spliceosome	4	288	138	7565	0.776902	0.945968	0.761373	0.109634	0.0241234
PATH:04140	Regulation of autophagy	1	288	40	7565	0.789157	0.948088	0.656684	0.102837	0.0231514
PATH:00051	Fructose and mannose metabolism	1	288	40	7565	0.789157	0.948088	0.656684	0.102837	0.0231514
PATH:01200	Carbon metabolism	3	288	109	7565	0.790746	0.948088	0.722955	0.101963	0.0231514
PATH:05219	Bladder cancer	1	288	42	7565	0.804988	0.951961	0.625413	0.0942105	0.0213809
PATH:04260	Cardiac muscle contraction	2	288	79	7565	0.809269	0.951961	0.664996	0.0919071	0.0213809
PATH:00270	Cysteine and methionine metabolism	1	288	43	7565	0.812454	0.951961	0.610869	0.0902014	0.0213809
PATH:00860	Porphyrin and chlorophyll metabolism	1	288	43	7565	0.812454	0.951961	0.610869	0.0902014	0.0213809
PATH:00620	Pyruvate metabolism	1	288	44	7565	0.819634	0.951961	0.596985	0.0863798	0.0213809
PATH:01100	Metabolic pathways	41	288	1213	7565	0.823246	0.951961	0.88785	0.0844702	0.0213809
PATH:00600	Sphingolipid metabolism	1	288	45	7565	0.826541	0.951961	0.583719	0.0827355	0.0213809
PATH:03050	Proteasome	1	288	46	7565	0.833184	0.951961	0.57103	0.079259	0.0213809
PATH:04978	Mineral absorption	1	288	47	7565	0.839574	0.951961	0.55888	0.0759411	0.0213809
PATH:05012	Parkinson's disease	4	288	153	7565	0.84052	0.951961	0.686728	0.0754518	0.0213809
PATH:04640	Hematopoietic cell lineage	2	288	86	7565	0.845217	0.951961	0.610869	0.073032	0.0213809
PATH:05030	Cocaine addiction	1	288	49	7565	0.85163	0.951961	0.536069	0.0697489	0.0213809
PATH:05144	Malaria	1	288	50	7565	0.857316	0.951961	0.525347	0.0668593	0.0213809
PATH:01212	Fatty acid metabolism	1	288	50	7565	0.857316	0.951961	0.525347	0.0668593	0.0213809
PATH:04974	Protein digestion and absorption	2	288	89	7565	0.858655	0.951961	0.590278	0.0661814	0.0213809
PATH:05016	Huntington's disease	5	288	191	7565	0.85879	0.951961	0.687627	0.0661129	0.0213809
PATH:05332	Graft-versus-host disease	1	288	54	7565	0.877967	0.96098	0.486433	0.056522	0.0172854
PATH:05034	Alcoholism	5	288	199	7565	0.881498	0.96098	0.659984	0.0547788	0.0172854
PATH:05168	Herpes simplex infection	5	288	200	7565	0.884106	0.96098	0.656684	0.0534958	0.0172854
PATH:00480	Glutathione metabolism	1	288	56	7565	0.887146	0.96098	0.46906	0.0520048	0.0172854
PATH:05134	Legionellosis	1	288	57	7565	0.891475	0.96098	0.460831	0.049891	0.0172854
PATH:05160	Hepatitis C	3	288	137	7565	0.89904	0.96098	0.575198	0.0462208	0.0172854
PATH:04064	NF-kappa B signaling pathway	2	288	100	7565	0.8993	0.96098	0.525347	0.0460954	0.0172854
PATH:00330	Arginine and proline metabolism	1	288	59	7565	0.899641	0.96098	0.44521	0.0459306	0.0172854
PATH:04721	Synaptic vesicle cycle	1	288	63	7565	0.914183	0.966848	0.416942	0.038967	0.0146417
PATH:04623	Cytosolic DNA-sensing pathway	1	288	63	7565	0.914183	0.966848	0.416942	0.038967	0.0146417
PATH:00970	Aminoacyl-tRNA biosynthesis	1	288	64	7565	0.917477	0.966848	0.410428	0.0374047	0.0146417
PATH:05320	Autoimmune thyroid disease	1	288	67	7565	0.926624	0.972127	0.39205	0.0330967	0.0122768
PATH:04920	Adipocytokine signaling pathway	1	288	71	7565	0.937266	0.978922	0.369963	0.0281371	0.00925175
PATH:04610	Complement and coagulation cascades	1	288	76	7565	0.948432	0.982706	0.345623	0.0229939	0.00757631
PATH:01230	Biosynthesis of amino acids	1	288	77	7565	0.950415	0.982706	0.341135	0.0220868	0.00757631
PATH:04612	Antigen processing and presentation	1	288	79	7565	0.954156	0.982706	0.332498	0.0203806	0.00757631
PATH:03320	PPAR signaling pathway	1	288	81	7565	0.957616	0.982706	0.324288	0.0188087	0.00757631
PATH:00140	Steroid hormone biosynthesis	1	288	85	7565	0.963774	0.982779	0.309028	0.0160248	0.00754412
PATH:05416	Viral myocarditis	1	288	89	7565	0.96904	0.982779	0.295139	0.0136582	0.00754412
PATH:00830	Retinol metabolism	1	288	90	7565	0.970233	0.982779	0.29186	0.013124	0.00754412
PATH:00590	Arachidonic acid metabolism	1	288	98	7565	0.978265	0.986662	0.268034	0.00954355	0.00583161
PATH:04142	Lysosome	1	288	123	7565	0.991883	0.996122	0.213556	0.00353964	0.00168764
PATH:04740	Olfactory transduction	14	288	1068	7565	1	1	0.344329	2.62927e-08	2.62927e-08

## Sheet: DownPathway2Gene
Supplementary Table 4. The enriched pathways of DMRs in whole genome using KEGG pathway analysis.
PathwayID	PathwayTerm	QueryID	Symbol	Description	P-Value	FDR	Enrichment
PATH:04520	Adherens junction	Tcf7l2	Tcf7l2	Transcription factor 7-like 2	0.00138713	0.137941	3.32967
PATH:04520	Adherens junction	Wasf2	Wasf2	Wiskott-Aldrich syndrome protein family member 2	0.00138713	0.137941	3.32967
PATH:04520	Adherens junction	Actn2	Actn2	Alpha-actinin-2	0.00138713	0.137941	3.32967
PATH:04520	Adherens junction	Cdc42	Cdc42	Cell division control protein 42 homolog	0.00138713	0.137941	3.32967
PATH:04520	Adherens junction	4930544G11Rik	4930544G11Rik	Testis specific expressed protein 5	0.00138713	0.137941	3.32967
PATH:04520	Adherens junction	Igf1r	Igf1r	Tyrosine-protein kinase receptor	0.00138713	0.137941	3.32967
PATH:04520	Adherens junction	Map3k7	Map3k7	Mitogen-activated protein kinase kinase kinase 7	0.00138713	0.137941	3.32967
PATH:04520	Adherens junction	Pard3	Pard3	Par-3 (Partitioning defective 3) homolog (C. elegans)	0.00138713	0.137941	3.32967
PATH:04520	Adherens junction	Tjp1	Tjp1	Tjp1 protein	0.00138713	0.137941	3.32967
PATH:04530	Tight junction	Actn2	Actn2	Alpha-actinin-2	0.00182761	0.137941	2.52945
PATH:04530	Tight junction	Cdc42	Cdc42	Cell division control protein 42 homolog	0.00182761	0.137941	2.52945
PATH:04530	Tight junction	4930544G11Rik	4930544G11Rik	Testis specific expressed protein 5	0.00182761	0.137941	2.52945
PATH:04530	Tight junction	Prkca	Prkca	Protein kinase C alpha type	0.00182761	0.137941	2.52945
PATH:04530	Tight junction	Pard6b	Pard6b	Partitioning defective 6 homolog beta	0.00182761	0.137941	2.52945
PATH:04530	Tight junction	Akt2	Akt2	RAC-beta serine/threonine-protein kinase	0.00182761	0.137941	2.52945
PATH:04530	Tight junction	Tjp2	Tjp2	Tight junction protein ZO-2	0.00182761	0.137941	2.52945
PATH:04530	Tight junction	Prkce	Prkce	Protein kinase C epsilon type	0.00182761	0.137941	2.52945
PATH:04530	Tight junction	Zak	Zak	Mitogen-activated protein kinase kinase kinase MLT	0.00182761	0.137941	2.52945
PATH:04530	Tight junction	Vapa	Vapa	Vesicle-associated membrane protein-associated protein A	0.00182761	0.137941	2.52945
PATH:04530	Tight junction	Pard3	Pard3	Par-3 (Partitioning defective 3) homolog (C. elegans)	0.00182761	0.137941	2.52945
PATH:04530	Tight junction	Magi2	Magi2	Putative uncharacterized protein	0.00182761	0.137941	2.52945
PATH:04530	Tight junction	Tjp1	Tjp1	Tjp1 protein	0.00182761	0.137941	2.52945
PATH:05032	Morphine addiction	Prkacb	Prkacb	cAMP-dependent protein kinase catalytic subunit beta transcript variant 5	0.00249349	0.137941	2.85515
PATH:05032	Morphine addiction	Kcnj3	Kcnj3	G protein-activated inward rectifier potassium channel 1	0.00249349	0.137941	2.85515
PATH:05032	Morphine addiction	Pde1a	Pde1a	Calcium/calmodulin-dependent 3',5'-cyclic nucleotide phosphodiesterase 1A	0.00249349	0.137941	2.85515
PATH:05032	Morphine addiction	Pde4d	Pde4d	Phosphodiesterase 4D, cAMP specific	0.00249349	0.137941	2.85515
PATH:05032	Morphine addiction	Prkca	Prkca	Protein kinase C alpha type	0.00249349	0.137941	2.85515
PATH:05032	Morphine addiction	Gabrg1	Gabrg1	GABA-A receptor gamma-1 subunit	0.00249349	0.137941	2.85515
PATH:05032	Morphine addiction	Pde4b	Pde4b	Protein Pde4b	0.00249349	0.137941	2.85515
PATH:05032	Morphine addiction	Gabrb2	Gabrb2	Gamma-aminobutyric acid receptor subunit beta-2	0.00249349	0.137941	2.85515
PATH:05032	Morphine addiction	Pde11a	Pde11a	Dual 3',5'-cyclic-AMP and -GMP phosphodiesterase 11A	0.00249349	0.137941	2.85515
PATH:05032	Morphine addiction	Oprm1	Oprm1	Mu opioid receptor mMOR-1R2	0.00249349	0.137941	2.85515
PATH:04010	MAPK signaling pathway	Ppp3ca	Ppp3ca	Serine/threonine-protein phosphatase 2B catalytic subunit alpha isoform	0.00339727	0.137941	1.93855
PATH:04010	MAPK signaling pathway	Mecom	Mecom	Evi1 protein	0.00339727	0.137941	1.93855
PATH:04010	MAPK signaling pathway	Prkacb	Prkacb	cAMP-dependent protein kinase catalytic subunit beta transcript variant 5	0.00339727	0.137941	1.93855
PATH:04010	MAPK signaling pathway	Cacna1d	Cacna1d	Cacna1d protein	0.00339727	0.137941	1.93855
PATH:04010	MAPK signaling pathway	Tgfb3	Tgfb3	Transforming growth factor beta-3	0.00339727	0.137941	1.93855
PATH:04010	MAPK signaling pathway	Fos	Fos	Proto-oncogene c-Fos	0.00339727	0.137941	1.93855
PATH:04010	MAPK signaling pathway	Rasgrp4	Rasgrp4	RAS guanyl-releasing protein 4	0.00339727	0.137941	1.93855
PATH:04010	MAPK signaling pathway	Cdc42	Cdc42	Cell division control protein 42 homolog	0.00339727	0.137941	1.93855
PATH:04010	MAPK signaling pathway	Prkca	Prkca	Protein kinase C alpha type	0.00339727	0.137941	1.93855
PATH:04010	MAPK signaling pathway	Il1r2	Il1r2	Interleukin-1 receptor type 2	0.00339727	0.137941	1.93855
PATH:04010	MAPK signaling pathway	Dusp3	Dusp3	Dual-specificity protein phosphatase 3	0.00339727	0.137941	1.93855
PATH:04010	MAPK signaling pathway	Akt2	Akt2	RAC-beta serine/threonine-protein kinase	0.00339727	0.137941	1.93855
PATH:04010	MAPK signaling pathway	Map3k1	Map3k1	Mitogen-activated protein kinase kinase kinase 1	0.00339727	0.137941	1.93855
PATH:04010	MAPK signaling pathway	Dusp4	Dusp4	Dual specificity protein phosphatase 4	0.00339727	0.137941	1.93855
PATH:04010	MAPK signaling pathway	Rasgrp3	Rasgrp3	RasGRP3	0.00339727	0.137941	1.93855
PATH:04010	MAPK signaling pathway	Ppp3r2	Ppp3r2	Protein phosphatase 3, regulatory subunit B, alpha isoform (Calcineurin B, type II)	0.00339727	0.137941	1.93855
PATH:04010	MAPK signaling pathway	Map3k7	Map3k7	Mitogen-activated protein kinase kinase kinase 7	0.00339727	0.137941	1.93855
PATH:04010	MAPK signaling pathway	Pla2g10	Pla2g10	Phospholipase A(2)	0.00339727	0.137941	1.93855
PATH:04010	MAPK signaling pathway	Fgf9	Fgf9	Fibroblast growth factor 9	0.00339727	0.137941	1.93855
PATH:04010	MAPK signaling pathway	Zak	Zak	Mitogen-activated protein kinase kinase kinase MLT	0.00339727	0.137941	1.93855
PATH:04070	Phosphatidylinositol signaling system	Pik3c3	Pik3c3	Phosphatidylinositol 3-kinase catalytic subunit type 3	0.00348967	0.137941	2.9186
PATH:04070	Phosphatidylinositol signaling system	Pik3c2g	Pik3c2g	Phosphatidylinositol 4-phosphate 3-kinase C2 domain-containing subunit gamma	0.00348967	0.137941	2.9186
PATH:04070	Phosphatidylinositol signaling system	Pi4ka	Pi4ka	Protein Pi4ka	0.00348967	0.137941	2.9186
PATH:04070	Phosphatidylinositol signaling system	Prkca	Prkca	Protein kinase C alpha type	0.00348967	0.137941	2.9186
PATH:04070	Phosphatidylinositol signaling system	Synj2	Synj2	Synaptojanin-2	0.00348967	0.137941	2.9186
PATH:04070	Phosphatidylinositol signaling system	Plcb4	Plcb4	Phosphoinositide phospholipase C	0.00348967	0.137941	2.9186
PATH:04070	Phosphatidylinositol signaling system	Dgkq	Dgkq	Diacylglycerol kinase theta	0.00348967	0.137941	2.9186
PATH:04070	Phosphatidylinositol signaling system	Pik3cg	Pik3cg	Phosphoinositide-3-kinase gamma polypeptide	0.00348967	0.137941	2.9186
PATH:04070	Phosphatidylinositol signaling system	Dgkz	Dgkz	Diacylglycerol kinase zeta	0.00348967	0.137941	2.9186
PATH:04015	Rap1 signaling pathway	Cdc42	Cdc42	Cell division control protein 42 homolog	0.0035219	0.137941	2.06734
PATH:04015	Rap1 signaling pathway	4930544G11Rik	4930544G11Rik	Testis specific expressed protein 5	0.0035219	0.137941	2.06734
PATH:04015	Rap1 signaling pathway	Vegfb	Vegfb	Vascular endothelial growth factor B	0.0035219	0.137941	2.06734
PATH:04015	Rap1 signaling pathway	Prkca	Prkca	Protein kinase C alpha type	0.0035219	0.137941	2.06734
PATH:04015	Rap1 signaling pathway	Pard6b	Pard6b	Partitioning defective 6 homolog beta	0.0035219	0.137941	2.06734
PATH:04015	Rap1 signaling pathway	Akt2	Akt2	RAC-beta serine/threonine-protein kinase	0.0035219	0.137941	2.06734
PATH:04015	Rap1 signaling pathway	Rasgrp3	Rasgrp3	RasGRP3	0.0035219	0.137941	2.06734
PATH:04015	Rap1 signaling pathway	Plcb4	Plcb4	Phosphoinositide phospholipase C	0.0035219	0.137941	2.06734
PATH:04015	Rap1 signaling pathway	Igf1r	Igf1r	Tyrosine-protein kinase receptor	0.0035219	0.137941	2.06734
PATH:04015	Rap1 signaling pathway	Prkd1	Prkd1	Serine/threonine-protein kinase D1	0.0035219	0.137941	2.06734
PATH:04015	Rap1 signaling pathway	Fgf9	Fgf9	Fibroblast growth factor 9	0.0035219	0.137941	2.06734
PATH:04015	Rap1 signaling pathway	Pik3cg	Pik3cg	Phosphoinositide-3-kinase gamma polypeptide	0.0035219	0.137941	2.06734
PATH:04015	Rap1 signaling pathway	Rapgef5	Rapgef5	Putative uncharacterized protein	0.0035219	0.137941	2.06734
PATH:04015	Rap1 signaling pathway	Sipa1l1	Sipa1l1	Sipa1l1 protein	0.0035219	0.137941	2.06734
PATH:04015	Rap1 signaling pathway	Pard3	Pard3	Par-3 (Partitioning defective 3) homolog (C. elegans)	0.0035219	0.137941	2.06734
PATH:04015	Rap1 signaling pathway	Rapgef4	Rapgef4	Rapgef4 protein	0.0035219	0.137941	2.06734
PATH:04015	Rap1 signaling pathway	Magi2	Magi2	Putative uncharacterized protein	0.0035219	0.137941	2.06734
PATH:05202	Transcriptional misregulation in cancer	Aff1	Aff1	Aff1 protein	0.00821185	0.275684	2.05443
PATH:05202	Transcriptional misregulation in cancer	Cdk14	Cdk14	Cyclin-dependent kinase 14	0.00821185	0.275684	2.05443
PATH:05202	Transcriptional misregulation in cancer	Id2	Id2	DNA-binding protein inhibitor ID-2	0.00821185	0.275684	2.05443
PATH:05202	Transcriptional misregulation in cancer	Mycn	Mycn	N-myc proto-oncogene protein	0.00821185	0.275684	2.05443
PATH:05202	Transcriptional misregulation in cancer	Runx1t1	Runx1t1	Protein CBFA2T1	0.00821185	0.275684	2.05443
PATH:05202	Transcriptional misregulation in cancer	Il1r2	Il1r2	Interleukin-1 receptor type 2	0.00821185	0.275684	2.05443
PATH:05202	Transcriptional misregulation in cancer	Etv5	Etv5	ETS translocation variant 5	0.00821185	0.275684	2.05443
PATH:05202	Transcriptional misregulation in cancer	Wt1	Wt1	Wilms tumor protein homolog	0.00821185	0.275684	2.05443
PATH:05202	Transcriptional misregulation in cancer	Igf1r	Igf1r	Tyrosine-protein kinase receptor	0.00821185	0.275684	2.05443
PATH:05202	Transcriptional misregulation in cancer	Six1	Six1	Putative uncharacterized protein	0.00821185	0.275684	2.05443
PATH:05202	Transcriptional misregulation in cancer	Smad1	Smad1	Mothers against decapentaplegic homolog 1	0.00821185	0.275684	2.05443
PATH:05202	Transcriptional misregulation in cancer	Meis1	Meis1	Homeobox protein Meis1	0.00821185	0.275684	2.05443
PATH:05202	Transcriptional misregulation in cancer	Gzmb	Gzmb	Granzyme B(G,H)	0.00821185	0.275684	2.05443
PATH:05202	Transcriptional misregulation in cancer	Hpgd	Hpgd	15-hydroxyprostaglandin dehydrogenase [NAD(+)]	0.00821185	0.275684	2.05443
PATH:04660	T cell receptor signaling pathway	Ppp3ca	Ppp3ca	Serine/threonine-protein phosphatase 2B catalytic subunit alpha isoform	0.00947948	0.27846	2.36643
PATH:04660	T cell receptor signaling pathway	Cd4	Cd4	T4 surface glycoprotein	0.00947948	0.27846	2.36643
PATH:04660	T cell receptor signaling pathway	Fos	Fos	Proto-oncogene c-Fos	0.00947948	0.27846	2.36643
PATH:04660	T cell receptor signaling pathway	Cdc42	Cdc42	Cell division control protein 42 homolog	0.00947948	0.27846	2.36643
PATH:04660	T cell receptor signaling pathway	4930544G11Rik	4930544G11Rik	Testis specific expressed protein 5	0.00947948	0.27846	2.36643
PATH:04660	T cell receptor signaling pathway	Akt2	Akt2	RAC-beta serine/threonine-protein kinase	0.00947948	0.27846	2.36643
PATH:04660	T cell receptor signaling pathway	Cblc	Cblc	Casitas B-lineage lymphoma c, isoform CRA_b	0.00947948	0.27846	2.36643
PATH:04660	T cell receptor signaling pathway	Ppp3r2	Ppp3r2	Protein phosphatase 3, regulatory subunit B, alpha isoform (Calcineurin B, type II)	0.00947948	0.27846	2.36643
PATH:04660	T cell receptor signaling pathway	Map3k7	Map3k7	Mitogen-activated protein kinase kinase kinase 7	0.00947948	0.27846	2.36643
PATH:04660	T cell receptor signaling pathway	Pik3cg	Pik3cg	Phosphoinositide-3-kinase gamma polypeptide	0.00947948	0.27846	2.36643
PATH:04360	Axon guidance	Ppp3ca	Ppp3ca	Serine/threonine-protein phosphatase 2B catalytic subunit alpha isoform	0.0129914	0.302887	2.15628
PATH:04360	Axon guidance	Sema3e	Sema3e	Semaphorin-3E	0.0129914	0.302887	2.15628
PATH:04360	Axon guidance	Sema3a	Sema3a	Semaphorin-3A	0.0129914	0.302887	2.15628
PATH:04360	Axon guidance	Cdc42	Cdc42	Cell division control protein 42 homolog	0.0129914	0.302887	2.15628
PATH:04360	Axon guidance	4930544G11Rik	4930544G11Rik	Testis specific expressed protein 5	0.0129914	0.302887	2.15628
PATH:04360	Axon guidance	Epha3	Epha3	Receptor protein-tyrosine kinase	0.0129914	0.302887	2.15628
PATH:04360	Axon guidance	Sema4b	Sema4b	Semaphorin-4B	0.0129914	0.302887	2.15628
PATH:04360	Axon guidance	Epha5	Epha5	Receptor protein-tyrosine kinase	0.0129914	0.302887	2.15628
PATH:04360	Axon guidance	Ppp3r2	Ppp3r2	Protein phosphatase 3, regulatory subunit B, alpha isoform (Calcineurin B, type II)	0.0129914	0.302887	2.15628
PATH:04360	Axon guidance	Robo1	Robo1	Roundabout homolog 1	0.0129914	0.302887	2.15628
PATH:04360	Axon guidance	Ablim1	Ablim1	Ablim1 protein	0.0129914	0.302887	2.15628
PATH:05203	Viral carcinogenesis	Hist4h4	Hist4h4	histone cluster 4, H4	0.0132559	0.302887	1.84332
PATH:05203	Viral carcinogenesis	Rbpjl	Rbpjl	Recombining binding protein suppressor of hairless-like protein	0.0132559	0.302887	1.84332
PATH:05203	Viral carcinogenesis	Prkacb	Prkacb	cAMP-dependent protein kinase catalytic subunit beta transcript variant 5	0.0132559	0.302887	1.84332
PATH:05203	Viral carcinogenesis	Gtf2e2	Gtf2e2	General transcription factor IIE subunit 2	0.0132559	0.302887	1.84332
PATH:05203	Viral carcinogenesis	Gtf2a1l	Gtf2a1l	TFIIA-alpha and beta-like factor	0.0132559	0.302887	1.84332
PATH:05203	Viral carcinogenesis	Ccnd3	Ccnd3	G1/S-specific cyclin-D3	0.0132559	0.302887	1.84332
PATH:05203	Viral carcinogenesis	Actn2	Actn2	Alpha-actinin-2	0.0132559	0.302887	1.84332
PATH:05203	Viral carcinogenesis	Il6st	Il6st	Interleukin-6 signal transductor	0.0132559	0.302887	1.84332
PATH:05203	Viral carcinogenesis	D1Pas1	D1Pas1	DNA segment, Chr 1, Pasteur Institute 1	0.0132559	0.302887	1.84332
PATH:05203	Viral carcinogenesis	Cdc42	Cdc42	Cell division control protein 42 homolog	0.0132559	0.302887	1.84332
PATH:05203	Viral carcinogenesis	4930544G11Rik	4930544G11Rik	Testis specific expressed protein 5	0.0132559	0.302887	1.84332
PATH:05203	Viral carcinogenesis	Hnrnpk	Hnrnpk	Heterogeneous nuclear ribonucleoprotein K	0.0132559	0.302887	1.84332
PATH:05203	Viral carcinogenesis	H2bfm	H2bfm	Protein H2bfm	0.0132559	0.302887	1.84332
PATH:05203	Viral carcinogenesis	Gtf2a1	Gtf2a1	Gtf2a1 protein	0.0132559	0.302887	1.84332
PATH:05203	Viral carcinogenesis	Ubr4	Ubr4	E3 ubiquitin-protein ligase UBR4	0.0132559	0.302887	1.84332
PATH:05203	Viral carcinogenesis	Pik3cg	Pik3cg	Phosphoinositide-3-kinase gamma polypeptide	0.0132559	0.302887	1.84332
PATH:04390	Hippo signaling pathway	Mob1b	Mob1b	MOB1, Mps One Binder kinase activator-like 1A (Yeast), isoform CRA_c	0.0142745	0.302887	2.04681
PATH:04390	Hippo signaling pathway	Tcf7l2	Tcf7l2	Transcription factor 7-like 2	0.0142745	0.302887	2.04681
PATH:04390	Hippo signaling pathway	Wwc1	Wwc1	Protein KIBRA	0.0142745	0.302887	2.04681
PATH:04390	Hippo signaling pathway	Tgfb3	Tgfb3	Transforming growth factor beta-3	0.0142745	0.302887	2.04681
PATH:04390	Hippo signaling pathway	Ccnd3	Ccnd3	G1/S-specific cyclin-D3	0.0142745	0.302887	2.04681
PATH:04390	Hippo signaling pathway	Id2	Id2	DNA-binding protein inhibitor ID-2	0.0142745	0.302887	2.04681
PATH:04390	Hippo signaling pathway	Pard6b	Pard6b	Partitioning defective 6 homolog beta	0.0142745	0.302887	2.04681
PATH:04390	Hippo signaling pathway	Gli2	Gli2	GLI-Kruppel family member	0.0142745	0.302887	2.04681
PATH:04390	Hippo signaling pathway	Wnt2	Wnt2	Protein Wnt-2	0.0142745	0.302887	2.04681
PATH:04390	Hippo signaling pathway	Crb1	Crb1	Crb1 protein	0.0142745	0.302887	2.04681
PATH:04390	Hippo signaling pathway	Smad1	Smad1	Mothers against decapentaplegic homolog 1	0.0142745	0.302887	2.04681
PATH:04390	Hippo signaling pathway	Pard3	Pard3	Par-3 (Partitioning defective 3) homolog (C. elegans)	0.0142745	0.302887	2.04681
PATH:05031	Amphetamine addiction	Ppp3ca	Ppp3ca	Serine/threonine-protein phosphatase 2B catalytic subunit alpha isoform	0.0154666	0.302887	2.6648
PATH:05031	Amphetamine addiction	Prkacb	Prkacb	cAMP-dependent protein kinase catalytic subunit beta transcript variant 5	0.0154666	0.302887	2.6648
PATH:05031	Amphetamine addiction	Cacna1d	Cacna1d	Cacna1d protein	0.0154666	0.302887	2.6648
PATH:05031	Amphetamine addiction	Fos	Fos	Proto-oncogene c-Fos	0.0154666	0.302887	2.6648
PATH:05031	Amphetamine addiction	Sirt1	Sirt1	Sirt1 protein	0.0154666	0.302887	2.6648
PATH:05031	Amphetamine addiction	Prkca	Prkca	Protein kinase C alpha type	0.0154666	0.302887	2.6648
PATH:05031	Amphetamine addiction	Ppp3r2	Ppp3r2	Protein phosphatase 3, regulatory subunit B, alpha isoform (Calcineurin B, type II)	0.0154666	0.302887	2.6648
PATH:04310	Wnt signaling pathway	Ppp3ca	Ppp3ca	Serine/threonine-protein phosphatase 2B catalytic subunit alpha isoform	0.017184	0.310633	1.99499
PATH:04310	Wnt signaling pathway	Tcf7l2	Tcf7l2	Transcription factor 7-like 2	0.017184	0.310633	1.99499
PATH:04310	Wnt signaling pathway	Prkacb	Prkacb	cAMP-dependent protein kinase catalytic subunit beta transcript variant 5	0.017184	0.310633	1.99499
PATH:04310	Wnt signaling pathway	Gm5415	Gm5415	Protein Gm5415	0.017184	0.310633	1.99499
PATH:04310	Wnt signaling pathway	Ccnd3	Ccnd3	G1/S-specific cyclin-D3	0.017184	0.310633	1.99499
PATH:04310	Wnt signaling pathway	4930544G11Rik	4930544G11Rik	Testis specific expressed protein 5	0.017184	0.310633	1.99499
PATH:04310	Wnt signaling pathway	Prkca	Prkca	Protein kinase C alpha type	0.017184	0.310633	1.99499
PATH:04310	Wnt signaling pathway	Wnt2	Wnt2	Protein Wnt-2	0.017184	0.310633	1.99499
PATH:04310	Wnt signaling pathway	Plcb4	Plcb4	Phosphoinositide phospholipase C	0.017184	0.310633	1.99499
PATH:04310	Wnt signaling pathway	Ppp3r2	Ppp3r2	Protein phosphatase 3, regulatory subunit B, alpha isoform (Calcineurin B, type II)	0.017184	0.310633	1.99499
PATH:04310	Wnt signaling pathway	Map3k7	Map3k7	Mitogen-activated protein kinase kinase kinase 7	0.017184	0.310633	1.99499
PATH:04310	Wnt signaling pathway	Dkk4	Dkk4	Dickkopf-related protein 4	0.017184	0.310633	1.99499
PATH:05205	Proteoglycans in cancer	Prkacb	Prkacb	cAMP-dependent protein kinase catalytic subunit beta transcript variant 5	0.0254151	0.338159	1.74341
PATH:05205	Proteoglycans in cancer	Il12b	Il12b	Interleukin-12 subunit beta	0.0254151	0.338159	1.74341
PATH:05205	Proteoglycans in cancer	Itgav	Itgav	Integrin alpha-V	0.0254151	0.338159	1.74341
PATH:05205	Proteoglycans in cancer	Cdc42	Cdc42	Cell division control protein 42 homolog	0.0254151	0.338159	1.74341
PATH:05205	Proteoglycans in cancer	Dcn	Dcn	Decorin	0.0254151	0.338159	1.74341
PATH:05205	Proteoglycans in cancer	4930544G11Rik	4930544G11Rik	Testis specific expressed protein 5	0.0254151	0.338159	1.74341
PATH:05205	Proteoglycans in cancer	Prkca	Prkca	Protein kinase C alpha type	0.0254151	0.338159	1.74341
PATH:05205	Proteoglycans in cancer	Akt2	Akt2	RAC-beta serine/threonine-protein kinase	0.0254151	0.338159	1.74341
PATH:05205	Proteoglycans in cancer	Cblc	Cblc	Casitas B-lineage lymphoma c, isoform CRA_b	0.0254151	0.338159	1.74341
PATH:05205	Proteoglycans in cancer	Wnt2	Wnt2	Protein Wnt-2	0.0254151	0.338159	1.74341
PATH:05205	Proteoglycans in cancer	Igf1r	Igf1r	Tyrosine-protein kinase receptor	0.0254151	0.338159	1.74341
PATH:05205	Proteoglycans in cancer	Fgf9	Fgf9	Fibroblast growth factor 9	0.0254151	0.338159	1.74341
PATH:05205	Proteoglycans in cancer	Pik3cg	Pik3cg	Phosphoinositide-3-kinase gamma polypeptide	0.0254151	0.338159	1.74341
PATH:05205	Proteoglycans in cancer	Ank3	Ank3	Ankyrin-3	0.0254151	0.338159	1.74341
PATH:05205	Proteoglycans in cancer	Igf2	Igf2	Insulin-like growth factor 2	0.0254151	0.338159	1.74341
PATH:05200	Pathways in cancer	Tcf7l2	Tcf7l2	Transcription factor 7-like 2	0.0256076	0.338159	1.5968
PATH:05200	Pathways in cancer	Mecom	Mecom	Evi1 protein	0.0256076	0.338159	1.5968
PATH:05200	Pathways in cancer	Itgav	Itgav	Integrin alpha-V	0.0256076	0.338159	1.5968
PATH:05200	Pathways in cancer	Tgfb3	Tgfb3	Transforming growth factor beta-3	0.0256076	0.338159	1.5968
PATH:05200	Pathways in cancer	Fos	Fos	Proto-oncogene c-Fos	0.0256076	0.338159	1.5968
PATH:05200	Pathways in cancer	Cdc42	Cdc42	Cell division control protein 42 homolog	0.0256076	0.338159	1.5968
PATH:05200	Pathways in cancer	Lama3	Lama3	Putative uncharacterized protein	0.0256076	0.338159	1.5968
PATH:05200	Pathways in cancer	4930544G11Rik	4930544G11Rik	Testis specific expressed protein 5	0.0256076	0.338159	1.5968
PATH:05200	Pathways in cancer	Vegfb	Vegfb	Vascular endothelial growth factor B	0.0256076	0.338159	1.5968
PATH:05200	Pathways in cancer	Runx1t1	Runx1t1	Protein CBFA2T1	0.0256076	0.338159	1.5968
PATH:05200	Pathways in cancer	Prkca	Prkca	Protein kinase C alpha type	0.0256076	0.338159	1.5968
PATH:05200	Pathways in cancer	Ccdc6	Ccdc6	Coiled-coil domain-containing protein 6	0.0256076	0.338159	1.5968
PATH:05200	Pathways in cancer	Gli2	Gli2	GLI-Kruppel family member	0.0256076	0.338159	1.5968
PATH:05200	Pathways in cancer	Akt2	Akt2	RAC-beta serine/threonine-protein kinase	0.0256076	0.338159	1.5968
PATH:05200	Pathways in cancer	Cblc	Cblc	Casitas B-lineage lymphoma c, isoform CRA_b	0.0256076	0.338159	1.5968
PATH:05200	Pathways in cancer	Wnt2	Wnt2	Protein Wnt-2	0.0256076	0.338159	1.5968
PATH:05200	Pathways in cancer	Igf1r	Igf1r	Tyrosine-protein kinase receptor	0.0256076	0.338159	1.5968
PATH:05200	Pathways in cancer	Mitf	Mitf	Microphthalmia-associated transcription factor B isoform	0.0256076	0.338159	1.5968
PATH:05200	Pathways in cancer	Fgf9	Fgf9	Fibroblast growth factor 9	0.0256076	0.338159	1.5968
PATH:05200	Pathways in cancer	Pik3cg	Pik3cg	Phosphoinositide-3-kinase gamma polypeptide	0.0256076	0.338159	1.5968
PATH:04973	Carbohydrate digestion and absorption	Cacna1d	Cacna1d	Cacna1d protein	0.0271962	0.338159	2.9186
PATH:04973	Carbohydrate digestion and absorption	Hk1	Hk1	Hexokinase 1	0.0271962	0.338159	2.9186
PATH:04973	Carbohydrate digestion and absorption	Akt2	Akt2	RAC-beta serine/threonine-protein kinase	0.0271962	0.338159	2.9186
PATH:04973	Carbohydrate digestion and absorption	Pik3cg	Pik3cg	Phosphoinositide-3-kinase gamma polypeptide	0.0271962	0.338159	2.9186
PATH:04973	Carbohydrate digestion and absorption	Sis	Sis	Sucrase-isomaltase	0.0271962	0.338159	2.9186
PATH:00562	Inositol phosphate metabolism	Pik3c3	Pik3c3	Phosphatidylinositol 3-kinase catalytic subunit type 3	0.0277891	0.338159	2.58367
PATH:00562	Inositol phosphate metabolism	Pik3c2g	Pik3c2g	Phosphatidylinositol 4-phosphate 3-kinase C2 domain-containing subunit gamma	0.0277891	0.338159	2.58367
PATH:00562	Inositol phosphate metabolism	Pi4ka	Pi4ka	Protein Pi4ka	0.0277891	0.338159	2.58367
PATH:00562	Inositol phosphate metabolism	Synj2	Synj2	Synaptojanin-2	0.0277891	0.338159	2.58367
PATH:00562	Inositol phosphate metabolism	Plcb4	Plcb4	Phosphoinositide phospholipase C	0.0277891	0.338159	2.58367
PATH:00562	Inositol phosphate metabolism	Pik3cg	Pik3cg	Phosphoinositide-3-kinase gamma polypeptide	0.0277891	0.338159	2.58367
PATH:04725	Cholinergic synapse	Prkacb	Prkacb	cAMP-dependent protein kinase catalytic subunit beta transcript variant 5	0.0279559	0.338159	2.09209
PATH:04725	Cholinergic synapse	Kcnj3	Kcnj3	G protein-activated inward rectifier potassium channel 1	0.0279559	0.338159	2.09209
PATH:04725	Cholinergic synapse	Cacna1d	Cacna1d	Cacna1d protein	0.0279559	0.338159	2.09209
PATH:04725	Cholinergic synapse	Fos	Fos	Proto-oncogene c-Fos	0.0279559	0.338159	2.09209
PATH:04725	Cholinergic synapse	Prkca	Prkca	Protein kinase C alpha type	0.0279559	0.338159	2.09209
PATH:04725	Cholinergic synapse	Chrm5	Chrm5	Muscarinic acetylcholine receptor M5	0.0279559	0.338159	2.09209
PATH:04725	Cholinergic synapse	Akt2	Akt2	RAC-beta serine/threonine-protein kinase	0.0279559	0.338159	2.09209
PATH:04725	Cholinergic synapse	Plcb4	Plcb4	Phosphoinositide phospholipase C	0.0279559	0.338159	2.09209
PATH:04725	Cholinergic synapse	Pik3cg	Pik3cg	Phosphoinositide-3-kinase gamma polypeptide	0.0279559	0.338159	2.09209
PATH:04370	VEGF signaling pathway	Ppp3ca	Ppp3ca	Serine/threonine-protein phosphatase 2B catalytic subunit alpha isoform	0.0284294	0.338159	2.35733
PATH:04370	VEGF signaling pathway	Cdc42	Cdc42	Cell division control protein 42 homolog	0.0284294	0.338159	2.35733
PATH:04370	VEGF signaling pathway	Prkca	Prkca	Protein kinase C alpha type	0.0284294	0.338159	2.35733
PATH:04370	VEGF signaling pathway	Akt2	Akt2	RAC-beta serine/threonine-protein kinase	0.0284294	0.338159	2.35733
PATH:04370	VEGF signaling pathway	Ppp3r2	Ppp3r2	Protein phosphatase 3, regulatory subunit B, alpha isoform (Calcineurin B, type II)	0.0284294	0.338159	2.35733
PATH:04370	VEGF signaling pathway	Pla2g10	Pla2g10	Phospholipase A(2)	0.0284294	0.338159	2.35733
PATH:04370	VEGF signaling pathway	Pik3cg	Pik3cg	Phosphoinositide-3-kinase gamma polypeptide	0.0284294	0.338159	2.35733
PATH:02010	ABC transporters	Abcg8	Abcg8	ATP-binding cassette sub-family G member 8	0.0295968	0.338159	2.85515
PATH:02010	ABC transporters	Abca1	Abca1	ATP-binding cassette sub-family A member 1	0.0295968	0.338159	2.85515
PATH:02010	ABC transporters	Abcb9	Abcb9	ATP-binding cassette sub-family B member 9	0.0295968	0.338159	2.85515
PATH:02010	ABC transporters	Abcg3	Abcg3	ATP-binding cassette sub-family G member 3	0.0295968	0.338159	2.85515
PATH:02010	ABC transporters	Abcc9	Abcc9	Hemi ATP-binding cassette protein SUR2A-55	0.0295968	0.338159	2.85515
PATH:05100	Bacterial invasion of epithelial cells	Wasf2	Wasf2	Wiskott-Aldrich syndrome protein family member 2	0.0302185	0.338159	2.32749
PATH:05100	Bacterial invasion of epithelial cells	Cdc42	Cdc42	Cell division control protein 42 homolog	0.0302185	0.338159	2.32749
PATH:05100	Bacterial invasion of epithelial cells	4930544G11Rik	4930544G11Rik	Testis specific expressed protein 5	0.0302185	0.338159	2.32749
PATH:05100	Bacterial invasion of epithelial cells	Arhgap10	Arhgap10	Rho GTPase-activating protein 10	0.0302185	0.338159	2.32749
PATH:05100	Bacterial invasion of epithelial cells	Cblc	Cblc	Casitas B-lineage lymphoma c, isoform CRA_b	0.0302185	0.338159	2.32749
PATH:05100	Bacterial invasion of epithelial cells	Pik3cg	Pik3cg	Phosphoinositide-3-kinase gamma polypeptide	0.0302185	0.338159	2.32749
PATH:05100	Bacterial invasion of epithelial cells	Dock1	Dock1	Dedicator of cytokinesis protein 1	0.0302185	0.338159	2.32749
PATH:04915	Estrogen signaling pathway	Prkacb	Prkacb	cAMP-dependent protein kinase catalytic subunit beta transcript variant 5	0.0327268	0.344097	2.14427
PATH:04915	Estrogen signaling pathway	Kcnj3	Kcnj3	G protein-activated inward rectifier potassium channel 1	0.0327268	0.344097	2.14427
PATH:04915	Estrogen signaling pathway	Fos	Fos	Proto-oncogene c-Fos	0.0327268	0.344097	2.14427
PATH:04915	Estrogen signaling pathway	Esr2	Esr2	Estrogen receptor beta	0.0327268	0.344097	2.14427
PATH:04915	Estrogen signaling pathway	Akt2	Akt2	RAC-beta serine/threonine-protein kinase	0.0327268	0.344097	2.14427
PATH:04915	Estrogen signaling pathway	Plcb4	Plcb4	Phosphoinositide phospholipase C	0.0327268	0.344097	2.14427
PATH:04915	Estrogen signaling pathway	Pik3cg	Pik3cg	Phosphoinositide-3-kinase gamma polypeptide	0.0327268	0.344097	2.14427
PATH:04915	Estrogen signaling pathway	Oprm1	Oprm1	Mu opioid receptor mMOR-1R2	0.0327268	0.344097	2.14427
PATH:00670	One carbon pool by folate	Mthfsl	Gm2382	5-formyltetrahydrofolate cyclo-ligase	0.0336775	0.344097	4.14748
PATH:00670	One carbon pool by folate	Tyms	Tyms	Thymidylate synthase, isoform CRA_b	0.0336775	0.344097	4.14748
PATH:00670	One carbon pool by folate	Aldh1l2	Aldh1l2	Mitochondrial 10-formyltetrahydrofolate dehydrogenase	0.0336775	0.344097	4.14748
PATH:05146	Amoebiasis	Prkacb	Prkacb	cAMP-dependent protein kinase catalytic subunit beta transcript variant 5	0.037271	0.364946	1.98661
PATH:05146	Amoebiasis	Il12b	Il12b	Interleukin-12 subunit beta	0.037271	0.364946	1.98661
PATH:05146	Amoebiasis	Tgfb3	Tgfb3	Transforming growth factor beta-3	0.037271	0.364946	1.98661
PATH:05146	Amoebiasis	Actn2	Actn2	Alpha-actinin-2	0.037271	0.364946	1.98661
PATH:05146	Amoebiasis	Lama3	Lama3	Putative uncharacterized protein	0.037271	0.364946	1.98661
PATH:05146	Amoebiasis	Prkca	Prkca	Protein kinase C alpha type	0.037271	0.364946	1.98661
PATH:05146	Amoebiasis	Il1r2	Il1r2	Interleukin-1 receptor type 2	0.037271	0.364946	1.98661
PATH:05146	Amoebiasis	Plcb4	Plcb4	Phosphoinositide phospholipase C	0.037271	0.364946	1.98661
PATH:05146	Amoebiasis	Pik3cg	Pik3cg	Phosphoinositide-3-kinase gamma polypeptide	0.037271	0.364946	1.98661
PATH:05210	Colorectal cancer	Tcf7l2	Tcf7l2	Transcription factor 7-like 2	0.0389141	0.365793	2.38794
PATH:05210	Colorectal cancer	Tgfb3	Tgfb3	Transforming growth factor beta-3	0.0389141	0.365793	2.38794
PATH:05210	Colorectal cancer	Fos	Fos	Proto-oncogene c-Fos	0.0389141	0.365793	2.38794
PATH:05210	Colorectal cancer	4930544G11Rik	4930544G11Rik	Testis specific expressed protein 5	0.0389141	0.365793	2.38794
PATH:05210	Colorectal cancer	Akt2	Akt2	RAC-beta serine/threonine-protein kinase	0.0389141	0.365793	2.38794
PATH:05210	Colorectal cancer	Pik3cg	Pik3cg	Phosphoinositide-3-kinase gamma polypeptide	0.0389141	0.365793	2.38794
PATH:04666	Fc gamma R-mediated phagocytosis	Wasf2	Wasf2	Wiskott-Aldrich syndrome protein family member 2	0.0497844	0.430057	2.08945
PATH:04666	Fc gamma R-mediated phagocytosis	Cdc42	Cdc42	Cell division control protein 42 homolog	0.0497844	0.430057	2.08945
PATH:04666	Fc gamma R-mediated phagocytosis	Prkca	Prkca	Protein kinase C alpha type	0.0497844	0.430057	2.08945
PATH:04666	Fc gamma R-mediated phagocytosis	Akt2	Akt2	RAC-beta serine/threonine-protein kinase	0.0497844	0.430057	2.08945
PATH:04666	Fc gamma R-mediated phagocytosis	Myo10	Myo10	Unconventional myosin-X	0.0497844	0.430057	2.08945
PATH:04666	Fc gamma R-mediated phagocytosis	Prkce	Prkce	Protein kinase C epsilon type	0.0497844	0.430057	2.08945
PATH:04666	Fc gamma R-mediated phagocytosis	Pik3cg	Pik3cg	Phosphoinositide-3-kinase gamma polypeptide	0.0497844	0.430057	2.08945
PATH:04014	Ras signaling pathway	Prkacb	Prkacb	cAMP-dependent protein kinase catalytic subunit beta transcript variant 5	0.0524839	0.430057	1.61291
PATH:04014	Ras signaling pathway	Rasal1	Rasal1	RasGAP-activating-like protein 1	0.0524839	0.430057	1.61291
PATH:04014	Ras signaling pathway	Rasgrp4	Rasgrp4	RAS guanyl-releasing protein 4	0.0524839	0.430057	1.61291
PATH:04014	Ras signaling pathway	Cdc42	Cdc42	Cell division control protein 42 homolog	0.0524839	0.430057	1.61291
PATH:04014	Ras signaling pathway	4930544G11Rik	4930544G11Rik	Testis specific expressed protein 5	0.0524839	0.430057	1.61291
PATH:04014	Ras signaling pathway	Vegfb	Vegfb	Vascular endothelial growth factor B	0.0524839	0.430057	1.61291
PATH:04014	Ras signaling pathway	Prkca	Prkca	Protein kinase C alpha type	0.0524839	0.430057	1.61291
PATH:04014	Ras signaling pathway	Akt2	Akt2	RAC-beta serine/threonine-protein kinase	0.0524839	0.430057	1.61291
PATH:04014	Ras signaling pathway	Rasgrp3	Rasgrp3	RasGRP3	0.0524839	0.430057	1.61291
PATH:04014	Ras signaling pathway	Igf1r	Igf1r	Tyrosine-protein kinase receptor	0.0524839	0.430057	1.61291
PATH:04014	Ras signaling pathway	Pla2g10	Pla2g10	Phospholipase A(2)	0.0524839	0.430057	1.61291
PATH:04014	Ras signaling pathway	Fgf9	Fgf9	Fibroblast growth factor 9	0.0524839	0.430057	1.61291
PATH:04014	Ras signaling pathway	Pik3cg	Pik3cg	Phosphoinositide-3-kinase gamma polypeptide	0.0524839	0.430057	1.61291
PATH:04014	Ras signaling pathway	Rapgef5	Rapgef5	Putative uncharacterized protein	0.0524839	0.430057	1.61291
PATH:04380	Osteoclast differentiation	Ppp3ca	Ppp3ca	Serine/threonine-protein phosphatase 2B catalytic subunit alpha isoform	0.0527148	0.430057	1.86147
PATH:04380	Osteoclast differentiation	Fcgr3	Fcgr3	Low affinity immunoglobulin gamma Fc region receptor III	0.0527148	0.430057	1.86147
PATH:04380	Osteoclast differentiation	Fos	Fos	Proto-oncogene c-Fos	0.0527148	0.430057	1.86147
PATH:04380	Osteoclast differentiation	Akt2	Akt2	RAC-beta serine/threonine-protein kinase	0.0527148	0.430057	1.86147
PATH:04380	Osteoclast differentiation	Ppp3r2	Ppp3r2	Protein phosphatase 3, regulatory subunit B, alpha isoform (Calcineurin B, type II)	0.0527148	0.430057	1.86147
PATH:04380	Osteoclast differentiation	Nox3	Nox3	NADPH oxidase 3	0.0527148	0.430057	1.86147
PATH:04380	Osteoclast differentiation	Mitf	Mitf	Microphthalmia-associated transcription factor B isoform	0.0527148	0.430057	1.86147
PATH:04380	Osteoclast differentiation	Map3k7	Map3k7	Mitogen-activated protein kinase kinase kinase 7	0.0527148	0.430057	1.86147
PATH:04380	Osteoclast differentiation	Pik3cg	Pik3cg	Phosphoinositide-3-kinase gamma polypeptide	0.0527148	0.430057	1.86147
PATH:04510	Focal adhesion	Itgav	Itgav	Integrin alpha-V	0.053775	0.430057	1.64171
PATH:04510	Focal adhesion	Tnr	Tnr	Tenascin-R	0.053775	0.430057	1.64171
PATH:04510	Focal adhesion	Ccnd3	Ccnd3	G1/S-specific cyclin-D3	0.053775	0.430057	1.64171
PATH:04510	Focal adhesion	Actn2	Actn2	Alpha-actinin-2	0.053775	0.430057	1.64171
PATH:04510	Focal adhesion	Cdc42	Cdc42	Cell division control protein 42 homolog	0.053775	0.430057	1.64171
PATH:04510	Focal adhesion	Lama3	Lama3	Putative uncharacterized protein	0.053775	0.430057	1.64171
PATH:04510	Focal adhesion	4930544G11Rik	4930544G11Rik	Testis specific expressed protein 5	0.053775	0.430057	1.64171
PATH:04510	Focal adhesion	Vegfb	Vegfb	Vascular endothelial growth factor B	0.053775	0.430057	1.64171
PATH:04510	Focal adhesion	Prkca	Prkca	Protein kinase C alpha type	0.053775	0.430057	1.64171
PATH:04510	Focal adhesion	Akt2	Akt2	RAC-beta serine/threonine-protein kinase	0.053775	0.430057	1.64171
PATH:04510	Focal adhesion	Igf1r	Igf1r	Tyrosine-protein kinase receptor	0.053775	0.430057	1.64171
PATH:04510	Focal adhesion	Pik3cg	Pik3cg	Phosphoinositide-3-kinase gamma polypeptide	0.053775	0.430057	1.64171
PATH:04510	Focal adhesion	Dock1	Dock1	Dedicator of cytokinesis protein 1	0.053775	0.430057	1.64171
PATH:04724	Glutamatergic synapse	Ppp3ca	Ppp3ca	Serine/threonine-protein phosphatase 2B catalytic subunit alpha isoform	0.0549008	0.430057	1.84692
PATH:04724	Glutamatergic synapse	Prkacb	Prkacb	cAMP-dependent protein kinase catalytic subunit beta transcript variant 5	0.0549008	0.430057	1.84692
PATH:04724	Glutamatergic synapse	Kcnj3	Kcnj3	G protein-activated inward rectifier potassium channel 1	0.0549008	0.430057	1.84692
PATH:04724	Glutamatergic synapse	Cacna1d	Cacna1d	Cacna1d protein	0.0549008	0.430057	1.84692
PATH:04724	Glutamatergic synapse	Shank1	Shank1	SH3 and multiple ankyrin repeat domains protein 1	0.0549008	0.430057	1.84692
PATH:04724	Glutamatergic synapse	Prkca	Prkca	Protein kinase C alpha type	0.0549008	0.430057	1.84692
PATH:04724	Glutamatergic synapse	Plcb4	Plcb4	Phosphoinositide phospholipase C	0.0549008	0.430057	1.84692
PATH:04724	Glutamatergic synapse	Ppp3r2	Ppp3r2	Protein phosphatase 3, regulatory subunit B, alpha isoform (Calcineurin B, type II)	0.0549008	0.430057	1.84692
PATH:04724	Glutamatergic synapse	Pla2g10	Pla2g10	Phospholipase A(2)	0.0549008	0.430057	1.84692
PATH:04270	Vascular smooth muscle contraction	Prkacb	Prkacb	cAMP-dependent protein kinase catalytic subunit beta transcript variant 5	0.0571451	0.433197	1.83261
PATH:04270	Vascular smooth muscle contraction	Cacna1d	Cacna1d	Cacna1d protein	0.0571451	0.433197	1.83261
PATH:04270	Vascular smooth muscle contraction	4930544G11Rik	4930544G11Rik	Testis specific expressed protein 5	0.0571451	0.433197	1.83261
PATH:04270	Vascular smooth muscle contraction	Prkca	Prkca	Protein kinase C alpha type	0.0571451	0.433197	1.83261
PATH:04270	Vascular smooth muscle contraction	Agtr1a	Agtr1a	Type-1A angiotensin II receptor	0.0571451	0.433197	1.83261
PATH:04270	Vascular smooth muscle contraction	Plcb4	Plcb4	Phosphoinositide phospholipase C	0.0571451	0.433197	1.83261
PATH:04270	Vascular smooth muscle contraction	Prkce	Prkce	Protein kinase C epsilon type	0.0571451	0.433197	1.83261
PATH:04270	Vascular smooth muscle contraction	Cald1	Cald1	Protein Cald1	0.0571451	0.433197	1.83261
PATH:04270	Vascular smooth muscle contraction	Pla2g10	Pla2g10	Phospholipase A(2)	0.0571451	0.433197	1.83261
PATH:04114	Oocyte meiosis	Ppp3ca	Ppp3ca	Serine/threonine-protein phosphatase 2B catalytic subunit alpha isoform	0.0631886	0.464041	1.87624
PATH:04114	Oocyte meiosis	Prkacb	Prkacb	cAMP-dependent protein kinase catalytic subunit beta transcript variant 5	0.0631886	0.464041	1.87624
PATH:04114	Oocyte meiosis	Sgol1	Sgol1	Shugoshin-like 1	0.0631886	0.464041	1.87624
PATH:04114	Oocyte meiosis	Cdc23	Cdc23	Cell division cycle protein 23 homolog	0.0631886	0.464041	1.87624
PATH:04114	Oocyte meiosis	Ppp3r2	Ppp3r2	Protein phosphatase 3, regulatory subunit B, alpha isoform (Calcineurin B, type II)	0.0631886	0.464041	1.87624
PATH:04114	Oocyte meiosis	Igf1r	Igf1r	Tyrosine-protein kinase receptor	0.0631886	0.464041	1.87624
PATH:04114	Oocyte meiosis	Anapc1	Anapc1	Anaphase-promoting complex subunit 1	0.0631886	0.464041	1.87624
PATH:04114	Oocyte meiosis	Slk	Slk	Slk protein	0.0631886	0.464041	1.87624
PATH:04662	B cell receptor signaling pathway	Ppp3ca	Ppp3ca	Serine/threonine-protein phosphatase 2B catalytic subunit alpha isoform	0.0722752	0.514687	2.04681
PATH:04662	B cell receptor signaling pathway	Fos	Fos	Proto-oncogene c-Fos	0.0722752	0.514687	2.04681
PATH:04662	B cell receptor signaling pathway	Akt2	Akt2	RAC-beta serine/threonine-protein kinase	0.0722752	0.514687	2.04681
PATH:04662	B cell receptor signaling pathway	Rasgrp3	Rasgrp3	RasGRP3	0.0722752	0.514687	2.04681
PATH:04662	B cell receptor signaling pathway	Ppp3r2	Ppp3r2	Protein phosphatase 3, regulatory subunit B, alpha isoform (Calcineurin B, type II)	0.0722752	0.514687	2.04681
PATH:04662	B cell receptor signaling pathway	Pik3cg	Pik3cg	Phosphoinositide-3-kinase gamma polypeptide	0.0722752	0.514687	2.04681
PATH:04921	Oxytocin signaling pathway	Ppp3ca	Ppp3ca	Serine/threonine-protein phosphatase 2B catalytic subunit alpha isoform	0.0787806	0.520173	1.66249
PATH:04921	Oxytocin signaling pathway	Prkacb	Prkacb	cAMP-dependent protein kinase catalytic subunit beta transcript variant 5	0.0787806	0.520173	1.66249
PATH:04921	Oxytocin signaling pathway	Kcnj3	Kcnj3	G protein-activated inward rectifier potassium channel 1	0.0787806	0.520173	1.66249
PATH:04921	Oxytocin signaling pathway	Cacna1d	Cacna1d	Cacna1d protein	0.0787806	0.520173	1.66249
PATH:04921	Oxytocin signaling pathway	Fos	Fos	Proto-oncogene c-Fos	0.0787806	0.520173	1.66249
PATH:04921	Oxytocin signaling pathway	4930544G11Rik	4930544G11Rik	Testis specific expressed protein 5	0.0787806	0.520173	1.66249
PATH:04921	Oxytocin signaling pathway	Prkca	Prkca	Protein kinase C alpha type	0.0787806	0.520173	1.66249
PATH:04921	Oxytocin signaling pathway	Plcb4	Plcb4	Phosphoinositide phospholipase C	0.0787806	0.520173	1.66249
PATH:04921	Oxytocin signaling pathway	Ppp3r2	Ppp3r2	Protein phosphatase 3, regulatory subunit B, alpha isoform (Calcineurin B, type II)	0.0787806	0.520173	1.66249
PATH:04921	Oxytocin signaling pathway	Pik3cg	Pik3cg	Phosphoinositide-3-kinase gamma polypeptide	0.0787806	0.520173	1.66249
PATH:04713	Circadian entrainment	Prkacb	Prkacb	cAMP-dependent protein kinase catalytic subunit beta transcript variant 5	0.0792663	0.520173	1.87624
PATH:04713	Circadian entrainment	Kcnj3	Kcnj3	G protein-activated inward rectifier potassium channel 1	0.0792663	0.520173	1.87624
PATH:04713	Circadian entrainment	Cacna1d	Cacna1d	Cacna1d protein	0.0792663	0.520173	1.87624
PATH:04713	Circadian entrainment	Fos	Fos	Proto-oncogene c-Fos	0.0792663	0.520173	1.87624
PATH:04713	Circadian entrainment	Prkca	Prkca	Protein kinase C alpha type	0.0792663	0.520173	1.87624
PATH:04713	Circadian entrainment	Prkg2	Prkg2	cGMP-dependent protein kinase	0.0792663	0.520173	1.87624
PATH:04713	Circadian entrainment	Plcb4	Plcb4	Phosphoinositide phospholipase C	0.0792663	0.520173	1.87624
PATH:05132	Salmonella infection	Wasf2	Wasf2	Wiskott-Aldrich syndrome protein family member 2	0.0796861	0.520173	1.99499
PATH:05132	Salmonella infection	Fos	Fos	Proto-oncogene c-Fos	0.0796861	0.520173	1.99499
PATH:05132	Salmonella infection	Cdc42	Cdc42	Cell division control protein 42 homolog	0.0796861	0.520173	1.99499
PATH:05132	Salmonella infection	Dync1i2	Dync1i2	Cytoplasmic dynein 1 intermediate chain 2	0.0796861	0.520173	1.99499
PATH:05132	Salmonella infection	Klc1	Klc1	Kinesin light chain 1T	0.0796861	0.520173	1.99499
PATH:05132	Salmonella infection	Tjp1	Tjp1	Tjp1 protein	0.0796861	0.520173	1.99499
PATH:04670	Leukocyte transendothelial migration	Actn2	Actn2	Alpha-actinin-2	0.0866224	0.550169	1.75116
PATH:04670	Leukocyte transendothelial migration	Cdc42	Cdc42	Cell division control protein 42 homolog	0.0866224	0.550169	1.75116
PATH:04670	Leukocyte transendothelial migration	4930544G11Rik	4930544G11Rik	Testis specific expressed protein 5	0.0866224	0.550169	1.75116
PATH:04670	Leukocyte transendothelial migration	Prkca	Prkca	Protein kinase C alpha type	0.0866224	0.550169	1.75116
PATH:04670	Leukocyte transendothelial migration	Nox3	Nox3	NADPH oxidase 3	0.0866224	0.550169	1.75116
PATH:04670	Leukocyte transendothelial migration	Pik3cg	Pik3cg	Phosphoinositide-3-kinase gamma polypeptide	0.0866224	0.550169	1.75116
PATH:04670	Leukocyte transendothelial migration	Cdh5	Cdh5	Cadherin-5	0.0866224	0.550169	1.75116
PATH:04670	Leukocyte transendothelial migration	Rapgef4	Rapgef4	Rapgef4 protein	0.0866224	0.550169	1.75116
PATH:04912	GnRH signaling pathway	Prkacb	Prkacb	cAMP-dependent protein kinase catalytic subunit beta transcript variant 5	0.0897393	0.554967	1.82051
PATH:04912	GnRH signaling pathway	Cacna1d	Cacna1d	Cacna1d protein	0.0897393	0.554967	1.82051
PATH:04912	GnRH signaling pathway	Cdc42	Cdc42	Cell division control protein 42 homolog	0.0897393	0.554967	1.82051
PATH:04912	GnRH signaling pathway	Prkca	Prkca	Protein kinase C alpha type	0.0897393	0.554967	1.82051
PATH:04912	GnRH signaling pathway	Map3k1	Map3k1	Mitogen-activated protein kinase kinase kinase 1	0.0897393	0.554967	1.82051
PATH:04912	GnRH signaling pathway	Plcb4	Plcb4	Phosphoinositide phospholipase C	0.0897393	0.554967	1.82051
PATH:04912	GnRH signaling pathway	Pla2g10	Pla2g10	Phospholipase A(2)	0.0897393	0.554967	1.82051
PATH:05142	Chagas disease (American trypanosomiasis)	Il12b	Il12b	Interleukin-12 subunit beta	0.0971352	0.561417	1.78516
PATH:05142	Chagas disease (American trypanosomiasis)	Tgfb3	Tgfb3	Transforming growth factor beta-3	0.0971352	0.561417	1.78516
PATH:05142	Chagas disease (American trypanosomiasis)	Fos	Fos	Proto-oncogene c-Fos	0.0971352	0.561417	1.78516
PATH:05142	Chagas disease (American trypanosomiasis)	Akt2	Akt2	RAC-beta serine/threonine-protein kinase	0.0971352	0.561417	1.78516
PATH:05142	Chagas disease (American trypanosomiasis)	Plcb4	Plcb4	Phosphoinositide phospholipase C	0.0971352	0.561417	1.78516
PATH:05142	Chagas disease (American trypanosomiasis)	Ace	Ace	Angiotensin-converting enzyme	0.0971352	0.561417	1.78516
PATH:05142	Chagas disease (American trypanosomiasis)	Pik3cg	Pik3cg	Phosphoinositide-3-kinase gamma polypeptide	0.0971352	0.561417	1.78516
PATH:04723	Retrograde endocannabinoid signaling	Prkacb	Prkacb	cAMP-dependent protein kinase catalytic subunit beta transcript variant 5	0.0971352	0.561417	1.78516
PATH:04723	Retrograde endocannabinoid signaling	Kcnj3	Kcnj3	G protein-activated inward rectifier potassium channel 1	0.0971352	0.561417	1.78516
PATH:04723	Retrograde endocannabinoid signaling	Cacna1d	Cacna1d	Cacna1d protein	0.0971352	0.561417	1.78516
PATH:04723	Retrograde endocannabinoid signaling	Prkca	Prkca	Protein kinase C alpha type	0.0971352	0.561417	1.78516
PATH:04723	Retrograde endocannabinoid signaling	Gabrg1	Gabrg1	GABA-A receptor gamma-1 subunit	0.0971352	0.561417	1.78516
PATH:04723	Retrograde endocannabinoid signaling	Plcb4	Plcb4	Phosphoinositide phospholipase C	0.0971352	0.561417	1.78516
PATH:04723	Retrograde endocannabinoid signaling	Gabrb2	Gabrb2	Gamma-aminobutyric acid receptor subunit beta-2	0.0971352	0.561417	1.78516
PATH:05140	Leishmaniasis	Fcgr3	Fcgr3	Low affinity immunoglobulin gamma Fc region receptor III	0.100639	0.561417	2.02057
PATH:05140	Leishmaniasis	Il12b	Il12b	Interleukin-12 subunit beta	0.100639	0.561417	2.02057
PATH:05140	Leishmaniasis	Tgfb3	Tgfb3	Transforming growth factor beta-3	0.100639	0.561417	2.02057
PATH:05140	Leishmaniasis	Fos	Fos	Proto-oncogene c-Fos	0.100639	0.561417	2.02057
PATH:05140	Leishmaniasis	Map3k7	Map3k7	Mitogen-activated protein kinase kinase kinase 7	0.100639	0.561417	2.02057
PATH:04150	mTOR signaling pathway	Vegfb	Vegfb	Vascular endothelial growth factor B	0.100639	0.561417	2.02057
PATH:04150	mTOR signaling pathway	Prkca	Prkca	Protein kinase C alpha type	0.100639	0.561417	2.02057
PATH:04150	mTOR signaling pathway	Akt2	Akt2	RAC-beta serine/threonine-protein kinase	0.100639	0.561417	2.02057
PATH:04150	mTOR signaling pathway	Pik3cg	Pik3cg	Phosphoinositide-3-kinase gamma polypeptide	0.100639	0.561417	2.02057
PATH:04150	mTOR signaling pathway	Rptor	Rptor	Regulatory-associated protein of mTOR	0.100639	0.561417	2.02057
PATH:04110	Cell cycle	Rad21	Rad21	RAD21 homolog (S. pombe)	0.107128	0.561417	1.66777
PATH:04110	Cell cycle	Dbf4	Dbf4	DBF4 homolog (S. cerevisiae)	0.107128	0.561417	1.66777
PATH:04110	Cell cycle	Prkdc	Prkdc	DNA-dependent protein kinase catalytic subunit	0.107128	0.561417	1.66777
PATH:04110	Cell cycle	Tgfb3	Tgfb3	Transforming growth factor beta-3	0.107128	0.561417	1.66777
PATH:04110	Cell cycle	Ccnd3	Ccnd3	G1/S-specific cyclin-D3	0.107128	0.561417	1.66777
PATH:04110	Cell cycle	Cdc14a	Cdc14a	Dual specificity protein phosphatase CDC14A	0.107128	0.561417	1.66777
PATH:04110	Cell cycle	Cdc23	Cdc23	Cell division cycle protein 23 homolog	0.107128	0.561417	1.66777
PATH:04110	Cell cycle	Anapc1	Anapc1	Anaphase-promoting complex subunit 1	0.107128	0.561417	1.66777
PATH:00520	Amino sugar and nucleotide sugar metabolism	Cyb5r3	Cyb5r3	NADH-cytochrome b5 reductase 3	0.108746	0.561417	2.18895
PATH:00520	Amino sugar and nucleotide sugar metabolism	Cyb5r2	Cyb5r2	NADH-cytochrome b5 reductase 2	0.108746	0.561417	2.18895
PATH:00520	Amino sugar and nucleotide sugar metabolism	Hk1	Hk1	Hexokinase 1	0.108746	0.561417	2.18895
PATH:00520	Amino sugar and nucleotide sugar metabolism	Pgm2	Pgm1	Phosphoglucomutase-2	0.108746	0.561417	2.18895
PATH:04914	Progesterone-mediated oocyte maturation	Prkacb	Prkacb	cAMP-dependent protein kinase catalytic subunit beta transcript variant 5	0.108824	0.561417	1.83261
PATH:04914	Progesterone-mediated oocyte maturation	Akt2	Akt2	RAC-beta serine/threonine-protein kinase	0.108824	0.561417	1.83261
PATH:04914	Progesterone-mediated oocyte maturation	Cdc23	Cdc23	Cell division cycle protein 23 homolog	0.108824	0.561417	1.83261
PATH:04914	Progesterone-mediated oocyte maturation	Igf1r	Igf1r	Tyrosine-protein kinase receptor	0.108824	0.561417	1.83261
PATH:04914	Progesterone-mediated oocyte maturation	Anapc1	Anapc1	Anaphase-promoting complex subunit 1	0.108824	0.561417	1.83261
PATH:04914	Progesterone-mediated oocyte maturation	Pik3cg	Pik3cg	Phosphoinositide-3-kinase gamma polypeptide	0.108824	0.561417	1.83261
PATH:04012	ErbB signaling pathway	Nrg1	Nrg1	Type III neuregulin 1	0.113382	0.561417	1.81154
PATH:04012	ErbB signaling pathway	Prkca	Prkca	Protein kinase C alpha type	0.113382	0.561417	1.81154
PATH:04012	ErbB signaling pathway	Akt2	Akt2	RAC-beta serine/threonine-protein kinase	0.113382	0.561417	1.81154
PATH:04012	ErbB signaling pathway	Nrg2	Nrg2	Pro-neuregulin-2, membrane-bound isoform	0.113382	0.561417	1.81154
PATH:04012	ErbB signaling pathway	Cblc	Cblc	Casitas B-lineage lymphoma c, isoform CRA_b	0.113382	0.561417	1.81154
PATH:04012	ErbB signaling pathway	Pik3cg	Pik3cg	Phosphoinositide-3-kinase gamma polypeptide	0.113382	0.561417	1.81154
PATH:04022	cGMP-PKG signaling pathway	Ppp3ca	Ppp3ca	Serine/threonine-protein phosphatase 2B catalytic subunit alpha isoform	0.113573	0.561417	1.54514
PATH:04022	cGMP-PKG signaling pathway	Cacna1d	Cacna1d	Cacna1d protein	0.113573	0.561417	1.54514
PATH:04022	cGMP-PKG signaling pathway	4930544G11Rik	4930544G11Rik	Testis specific expressed protein 5	0.113573	0.561417	1.54514
PATH:04022	cGMP-PKG signaling pathway	Prkg2	Prkg2	cGMP-dependent protein kinase	0.113573	0.561417	1.54514
PATH:04022	cGMP-PKG signaling pathway	Akt2	Akt2	RAC-beta serine/threonine-protein kinase	0.113573	0.561417	1.54514
PATH:04022	cGMP-PKG signaling pathway	Agtr1a	Agtr1a	Type-1A angiotensin II receptor	0.113573	0.561417	1.54514
PATH:04022	cGMP-PKG signaling pathway	Plcb4	Plcb4	Phosphoinositide phospholipase C	0.113573	0.561417	1.54514
PATH:04022	cGMP-PKG signaling pathway	Ppp3r2	Ppp3r2	Protein phosphatase 3, regulatory subunit B, alpha isoform (Calcineurin B, type II)	0.113573	0.561417	1.54514
PATH:04022	cGMP-PKG signaling pathway	Prkce	Prkce	Protein kinase C epsilon type	0.113573	0.561417	1.54514
PATH:04022	cGMP-PKG signaling pathway	Pik3cg	Pik3cg	Phosphoinositide-3-kinase gamma polypeptide	0.113573	0.561417	1.54514
PATH:00052	Galactose metabolism	Hk1	Hk1	Hexokinase 1	0.120714	0.561417	2.46257
PATH:00052	Galactose metabolism	Sis	Sis	Sucrase-isomaltase	0.120714	0.561417	2.46257
PATH:00052	Galactose metabolism	Pgm2	Pgm1	Phosphoglucomutase-2	0.120714	0.561417	2.46257
PATH:04930	Type II diabetes mellitus	Cacna1d	Cacna1d	Cacna1d protein	0.121555	0.561417	2.10139
PATH:04930	Type II diabetes mellitus	Hk1	Hk1	Hexokinase 1	0.121555	0.561417	2.10139
PATH:04930	Type II diabetes mellitus	Prkce	Prkce	Protein kinase C epsilon type	0.121555	0.561417	2.10139
PATH:04930	Type II diabetes mellitus	Pik3cg	Pik3cg	Phosphoinositide-3-kinase gamma polypeptide	0.121555	0.561417	2.10139
PATH:04720	Long-term potentiation	Ppp3ca	Ppp3ca	Serine/threonine-protein phosphatase 2B catalytic subunit alpha isoform	0.121607	0.561417	1.90343
PATH:04720	Long-term potentiation	Prkacb	Prkacb	cAMP-dependent protein kinase catalytic subunit beta transcript variant 5	0.121607	0.561417	1.90343
PATH:04720	Long-term potentiation	Prkca	Prkca	Protein kinase C alpha type	0.121607	0.561417	1.90343
PATH:04720	Long-term potentiation	Plcb4	Plcb4	Phosphoinositide phospholipase C	0.121607	0.561417	1.90343
PATH:04720	Long-term potentiation	Ppp3r2	Ppp3r2	Protein phosphatase 3, regulatory subunit B, alpha isoform (Calcineurin B, type II)	0.121607	0.561417	1.90343
PATH:05212	Pancreatic cancer	Tgfb3	Tgfb3	Transforming growth factor beta-3	0.127146	0.561417	1.87624
PATH:05212	Pancreatic cancer	Cdc42	Cdc42	Cell division control protein 42 homolog	0.127146	0.561417	1.87624
PATH:05212	Pancreatic cancer	Vegfb	Vegfb	Vascular endothelial growth factor B	0.127146	0.561417	1.87624
PATH:05212	Pancreatic cancer	Akt2	Akt2	RAC-beta serine/threonine-protein kinase	0.127146	0.561417	1.87624
PATH:05212	Pancreatic cancer	Pik3cg	Pik3cg	Phosphoinositide-3-kinase gamma polypeptide	0.127146	0.561417	1.87624
PATH:00561	Glycerolipid metabolism	Agk	Agk	Acylglycerol kinase, mitochondrial	0.128192	0.561417	2.06019
PATH:00561	Glycerolipid metabolism	Lpin1	Lpin1	Phosphatidate phosphatase LPIN1	0.128192	0.561417	2.06019
PATH:00561	Glycerolipid metabolism	Dgkq	Dgkq	Diacylglycerol kinase theta	0.128192	0.561417	2.06019
PATH:00561	Glycerolipid metabolism	Dgkz	Dgkz	Diacylglycerol kinase zeta	0.128192	0.561417	2.06019
PATH:05218	Melanoma	Akt2	Akt2	RAC-beta serine/threonine-protein kinase	0.132799	0.561417	1.84981
PATH:05218	Melanoma	Igf1r	Igf1r	Tyrosine-protein kinase receptor	0.132799	0.561417	1.84981
PATH:05218	Melanoma	Mitf	Mitf	Microphthalmia-associated transcription factor B isoform	0.132799	0.561417	1.84981
PATH:05218	Melanoma	Fgf9	Fgf9	Fibroblast growth factor 9	0.132799	0.561417	1.84981
PATH:05218	Melanoma	Pik3cg	Pik3cg	Phosphoinositide-3-kinase gamma polypeptide	0.132799	0.561417	1.84981
PATH:04728	Dopaminergic synapse	Ppp3ca	Ppp3ca	Serine/threonine-protein phosphatase 2B catalytic subunit alpha isoform	0.134135	0.561417	1.57999
PATH:04728	Dopaminergic synapse	Prkacb	Prkacb	cAMP-dependent protein kinase catalytic subunit beta transcript variant 5	0.134135	0.561417	1.57999
PATH:04728	Dopaminergic synapse	Kcnj3	Kcnj3	G protein-activated inward rectifier potassium channel 1	0.134135	0.561417	1.57999
PATH:04728	Dopaminergic synapse	Cacna1d	Cacna1d	Cacna1d protein	0.134135	0.561417	1.57999
PATH:04728	Dopaminergic synapse	Fos	Fos	Proto-oncogene c-Fos	0.134135	0.561417	1.57999
PATH:04728	Dopaminergic synapse	Prkca	Prkca	Protein kinase C alpha type	0.134135	0.561417	1.57999
PATH:04728	Dopaminergic synapse	Akt2	Akt2	RAC-beta serine/threonine-protein kinase	0.134135	0.561417	1.57999
PATH:04728	Dopaminergic synapse	Plcb4	Plcb4	Phosphoinositide phospholipase C	0.134135	0.561417	1.57999
PATH:04144	Endocytosis	Tgfb3	Tgfb3	Transforming growth factor beta-3	0.136617	0.561417	1.42628
PATH:04144	Endocytosis	Cdc42	Cdc42	Cell division control protein 42 homolog	0.136617	0.561417	1.42628
PATH:04144	Endocytosis	4930544G11Rik	4930544G11Rik	Testis specific expressed protein 5	0.136617	0.561417	1.42628
PATH:04144	Endocytosis	Pard6b	Pard6b	Partitioning defective 6 homolog beta	0.136617	0.561417	1.42628
PATH:04144	Endocytosis	Iqsec3	Iqsec3	IQ motif and SEC7 domain-containing protein 3	0.136617	0.561417	1.42628
PATH:04144	Endocytosis	Cblc	Cblc	Casitas B-lineage lymphoma c, isoform CRA_b	0.136617	0.561417	1.42628
PATH:04144	Endocytosis	Igf1r	Igf1r	Tyrosine-protein kinase receptor	0.136617	0.561417	1.42628
PATH:04144	Endocytosis	Psd3	Psd3	PH and SEC7 domain-containing protein 3	0.136617	0.561417	1.42628
PATH:04144	Endocytosis	Dnajc6	Dnajc6	Putative tyrosine-protein phosphatase auxilin	0.136617	0.561417	1.42628
PATH:04144	Endocytosis	Sh3glb1	Sh3glb1	Endophilin B1 testis variant	0.136617	0.561417	1.42628
PATH:04144	Endocytosis	Sh3gl2	Sh3gl2	Endophilin-A1	0.136617	0.561417	1.42628
PATH:04144	Endocytosis	Pard3	Pard3	Par-3 (Partitioning defective 3) homolog (C. elegans)	0.136617	0.561417	1.42628
PATH:00230	Purine metabolism	Nme6	Nme6	Nucleoside diphosphate kinase 6	0.137316	0.561417	1.48403
PATH:00230	Purine metabolism	Pde1a	Pde1a	Calcium/calmodulin-dependent 3',5'-cyclic nucleotide phosphodiesterase 1A	0.137316	0.561417	1.48403
PATH:00230	Purine metabolism	Pde4d	Pde4d	Phosphodiesterase 4D, cAMP specific	0.137316	0.561417	1.48403
PATH:00230	Purine metabolism	Fhit	Fhit	Bis(5'-adenosyl)-triphosphatase	0.137316	0.561417	1.48403
PATH:00230	Purine metabolism	Pde4b	Pde4b	Protein Pde4b	0.137316	0.561417	1.48403
PATH:00230	Purine metabolism	Nme4	Nme4	Nucleoside diphosphate kinase	0.137316	0.561417	1.48403
PATH:00230	Purine metabolism	Gmpr	Gmpr	GMP reductase 1	0.137316	0.561417	1.48403
PATH:00230	Purine metabolism	Pde11a	Pde11a	Dual 3',5'-cyclic-AMP and -GMP phosphodiesterase 11A	0.137316	0.561417	1.48403
PATH:00230	Purine metabolism	Pgm2	Pgm1	Phosphoglucomutase-2	0.137316	0.561417	1.48403
PATH:00230	Purine metabolism	Gda	Gda	Guanine deaminase	0.137316	0.561417	1.48403
PATH:05143	African trypanosomiasis	Il12b	Il12b	Interleukin-12 subunit beta	0.137997	0.561417	2.31771
PATH:05143	African trypanosomiasis	Prkca	Prkca	Protein kinase C alpha type	0.137997	0.561417	2.31771
PATH:05143	African trypanosomiasis	Plcb4	Plcb4	Phosphoinositide phospholipase C	0.137997	0.561417	2.31771
PATH:05211	Renal cell carcinoma	Tgfb3	Tgfb3	Transforming growth factor beta-3	0.138563	0.561417	1.82412
PATH:05211	Renal cell carcinoma	Cdc42	Cdc42	Cell division control protein 42 homolog	0.138563	0.561417	1.82412
PATH:05211	Renal cell carcinoma	Vegfb	Vegfb	Vascular endothelial growth factor B	0.138563	0.561417	1.82412
PATH:05211	Renal cell carcinoma	Akt2	Akt2	RAC-beta serine/threonine-protein kinase	0.138563	0.561417	1.82412
PATH:05211	Renal cell carcinoma	Pik3cg	Pik3cg	Phosphoinositide-3-kinase gamma polypeptide	0.138563	0.561417	1.82412
PATH:05220	Chronic myeloid leukemia	Mecom	Mecom	Evi1 protein	0.144435	0.575292	1.79913
PATH:05220	Chronic myeloid leukemia	Tgfb3	Tgfb3	Transforming growth factor beta-3	0.144435	0.575292	1.79913
PATH:05220	Chronic myeloid leukemia	Akt2	Akt2	RAC-beta serine/threonine-protein kinase	0.144435	0.575292	1.79913
PATH:05220	Chronic myeloid leukemia	Cblc	Cblc	Casitas B-lineage lymphoma c, isoform CRA_b	0.144435	0.575292	1.79913
PATH:05220	Chronic myeloid leukemia	Pik3cg	Pik3cg	Phosphoinositide-3-kinase gamma polypeptide	0.144435	0.575292	1.79913
PATH:04730	Long-term depression	Prkca	Prkca	Protein kinase C alpha type	0.150413	0.589118	1.77482
PATH:04730	Long-term depression	Prkg2	Prkg2	cGMP-dependent protein kinase	0.150413	0.589118	1.77482
PATH:04730	Long-term depression	Plcb4	Plcb4	Phosphoinositide phospholipase C	0.150413	0.589118	1.77482
PATH:04730	Long-term depression	Igf1r	Igf1r	Tyrosine-protein kinase receptor	0.150413	0.589118	1.77482
PATH:04730	Long-term depression	Pla2g10	Pla2g10	Phospholipase A(2)	0.150413	0.589118	1.77482
PATH:05223	Non-small cell lung cancer	Prkca	Prkca	Protein kinase C alpha type	0.163497	0.620787	1.87624
PATH:05223	Non-small cell lung cancer	Fhit	Fhit	Bis(5'-adenosyl)-triphosphatase	0.163497	0.620787	1.87624
PATH:05223	Non-small cell lung cancer	Akt2	Akt2	RAC-beta serine/threonine-protein kinase	0.163497	0.620787	1.87624
PATH:05223	Non-small cell lung cancer	Pik3cg	Pik3cg	Phosphoinositide-3-kinase gamma polypeptide	0.163497	0.620787	1.87624
PATH:04120	Ubiquitin mediated proteolysis	Ddb2	Ddb2	DNA damage-binding protein 2	0.164273	0.620787	1.50099
PATH:04120	Ubiquitin mediated proteolysis	Ube2a	Ube2a	Putative uncharacterized protein	0.164273	0.620787	1.50099
PATH:04120	Ubiquitin mediated proteolysis	Rnf7	Rnf7	RING-box protein 2	0.164273	0.620787	1.50099
PATH:04120	Ubiquitin mediated proteolysis	Ube2q2	Ube2q2	Ubiquitin-conjugating enzyme E2 Q2	0.164273	0.620787	1.50099
PATH:04120	Ubiquitin mediated proteolysis	Cdc23	Cdc23	Cell division cycle protein 23 homolog	0.164273	0.620787	1.50099
PATH:04120	Ubiquitin mediated proteolysis	Map3k1	Map3k1	Mitogen-activated protein kinase kinase kinase 1	0.164273	0.620787	1.50099
PATH:04120	Ubiquitin mediated proteolysis	Cblc	Cblc	Casitas B-lineage lymphoma c, isoform CRA_b	0.164273	0.620787	1.50099
PATH:04120	Ubiquitin mediated proteolysis	Anapc1	Anapc1	Anaphase-promoting complex subunit 1	0.164273	0.620787	1.50099
PATH:05221	Acute myeloid leukemia	Tcf7l2	Tcf7l2	Transcription factor 7-like 2	0.170945	0.620787	1.84332
PATH:05221	Acute myeloid leukemia	Runx1t1	Runx1t1	Protein CBFA2T1	0.170945	0.620787	1.84332
PATH:05221	Acute myeloid leukemia	Akt2	Akt2	RAC-beta serine/threonine-protein kinase	0.170945	0.620787	1.84332
PATH:05221	Acute myeloid leukemia	Pik3cg	Pik3cg	Phosphoinositide-3-kinase gamma polypeptide	0.170945	0.620787	1.84332
PATH:04020	Calcium signaling pathway	Ppp3ca	Ppp3ca	Serine/threonine-protein phosphatase 2B catalytic subunit alpha isoform	0.171365	0.620787	1.41222
PATH:04020	Calcium signaling pathway	Prkacb	Prkacb	cAMP-dependent protein kinase catalytic subunit beta transcript variant 5	0.171365	0.620787	1.41222
PATH:04020	Calcium signaling pathway	Cacna1d	Cacna1d	Cacna1d protein	0.171365	0.620787	1.41222
PATH:04020	Calcium signaling pathway	Pde1a	Pde1a	Calcium/calmodulin-dependent 3',5'-cyclic nucleotide phosphodiesterase 1A	0.171365	0.620787	1.41222
PATH:04020	Calcium signaling pathway	Prkca	Prkca	Protein kinase C alpha type	0.171365	0.620787	1.41222
PATH:04020	Calcium signaling pathway	Chrm5	Chrm5	Muscarinic acetylcholine receptor M5	0.171365	0.620787	1.41222
PATH:04020	Calcium signaling pathway	Agtr1a	Agtr1a	Type-1A angiotensin II receptor	0.171365	0.620787	1.41222
PATH:04020	Calcium signaling pathway	Hrh1	Hrh1	Histamine H1 receptor	0.171365	0.620787	1.41222
PATH:04020	Calcium signaling pathway	Plcb4	Plcb4	Phosphoinositide phospholipase C	0.171365	0.620787	1.41222
PATH:04020	Calcium signaling pathway	Ppp3r2	Ppp3r2	Protein phosphatase 3, regulatory subunit B, alpha isoform (Calcineurin B, type II)	0.171365	0.620787	1.41222
PATH:04614	Renin-angiotensin system	Agtr1a	Agtr1a	Type-1A angiotensin II receptor	0.175551	0.620787	2.62674
PATH:04614	Renin-angiotensin system	Ace	Ace	Angiotensin-converting enzyme	0.175551	0.620787	2.62674
PATH:00524	Butirosin and neomycin biosynthesis	Hk1	Hk1	Hexokinase 1	0.176441	0.620787	5.25347
PATH:05166	HTLV-I infection	Ppp3ca	Ppp3ca	Serine/threonine-protein phosphatase 2B catalytic subunit alpha isoform	0.180319	0.620787	1.31337
PATH:05166	HTLV-I infection	Prkacb	Prkacb	cAMP-dependent protein kinase catalytic subunit beta transcript variant 5	0.180319	0.620787	1.31337
PATH:05166	HTLV-I infection	Tgfb3	Tgfb3	Transforming growth factor beta-3	0.180319	0.620787	1.31337
PATH:05166	HTLV-I infection	Ccnd3	Ccnd3	G1/S-specific cyclin-D3	0.180319	0.620787	1.31337
PATH:05166	HTLV-I infection	Fos	Fos	Proto-oncogene c-Fos	0.180319	0.620787	1.31337
PATH:05166	HTLV-I infection	Xbp1	Xbp1	X-box-binding protein 1	0.180319	0.620787	1.31337
PATH:05166	HTLV-I infection	Il1r2	Il1r2	Interleukin-1 receptor type 2	0.180319	0.620787	1.31337
PATH:05166	HTLV-I infection	Akt2	Akt2	RAC-beta serine/threonine-protein kinase	0.180319	0.620787	1.31337
PATH:05166	HTLV-I infection	Cdc23	Cdc23	Cell division cycle protein 23 homolog	0.180319	0.620787	1.31337
PATH:05166	HTLV-I infection	Map3k1	Map3k1	Mitogen-activated protein kinase kinase kinase 1	0.180319	0.620787	1.31337
PATH:05166	HTLV-I infection	Wnt2	Wnt2	Protein Wnt-2	0.180319	0.620787	1.31337
PATH:05166	HTLV-I infection	Ppp3r2	Ppp3r2	Protein phosphatase 3, regulatory subunit B, alpha isoform (Calcineurin B, type II)	0.180319	0.620787	1.31337
PATH:05166	HTLV-I infection	Anapc1	Anapc1	Anaphase-promoting complex subunit 1	0.180319	0.620787	1.31337
PATH:05166	HTLV-I infection	Pik3cg	Pik3cg	Phosphoinositide-3-kinase gamma polypeptide	0.180319	0.620787	1.31337
PATH:04916	Melanogenesis	Tcf7l2	Tcf7l2	Transcription factor 7-like 2	0.180779	0.620787	1.57604
PATH:04916	Melanogenesis	Prkacb	Prkacb	cAMP-dependent protein kinase catalytic subunit beta transcript variant 5	0.180779	0.620787	1.57604
PATH:04916	Melanogenesis	Prkca	Prkca	Protein kinase C alpha type	0.180779	0.620787	1.57604
PATH:04916	Melanogenesis	Wnt2	Wnt2	Protein Wnt-2	0.180779	0.620787	1.57604
PATH:04916	Melanogenesis	Plcb4	Plcb4	Phosphoinositide phospholipase C	0.180779	0.620787	1.57604
PATH:04916	Melanogenesis	Mitf	Mitf	Microphthalmia-associated transcription factor B isoform	0.180779	0.620787	1.57604
PATH:04080	Neuroactive ligand-receptor interaction	P2ry14	P2ry14	Purinergic receptor P2Y, G-protein coupled, 14, isoform CRA_a	0.187052	0.620787	1.30405
PATH:04080	Neuroactive ligand-receptor interaction	Npffr2	Npffr2	Neuropeptide FF receptor 2	0.187052	0.620787	1.30405
PATH:04080	Neuroactive ligand-receptor interaction	Chrm5	Chrm5	Muscarinic acetylcholine receptor M5	0.187052	0.620787	1.30405
PATH:04080	Neuroactive ligand-receptor interaction	Gabrg1	Gabrg1	GABA-A receptor gamma-1 subunit	0.187052	0.620787	1.30405
PATH:04080	Neuroactive ligand-receptor interaction	Glp2r	Glp2r	Glucagon-like peptide 2 receptor	0.187052	0.620787	1.30405
PATH:04080	Neuroactive ligand-receptor interaction	Gpr156	Gpr156	Probable G-protein coupled receptor 156	0.187052	0.620787	1.30405
PATH:04080	Neuroactive ligand-receptor interaction	Agtr1a	Agtr1a	Type-1A angiotensin II receptor	0.187052	0.620787	1.30405
PATH:04080	Neuroactive ligand-receptor interaction	Hrh1	Hrh1	Histamine H1 receptor	0.187052	0.620787	1.30405
PATH:04080	Neuroactive ligand-receptor interaction	Rxfp1	Rxfp1	Relaxin receptor 1	0.187052	0.620787	1.30405
PATH:04080	Neuroactive ligand-receptor interaction	Gabrb2	Gabrb2	Gamma-aminobutyric acid receptor subunit beta-2	0.187052	0.620787	1.30405
PATH:04080	Neuroactive ligand-receptor interaction	S1pr3	S1pr3	Sphingosine 1-phosphate receptor 3	0.187052	0.620787	1.30405
PATH:04080	Neuroactive ligand-receptor interaction	Oprm1	Oprm1	Mu opioid receptor mMOR-1R2	0.187052	0.620787	1.30405
PATH:04080	Neuroactive ligand-receptor interaction	Htr1f	Htr1f	5-hydroxytryptamine receptor 1F	0.187052	0.620787	1.30405
PATH:04080	Neuroactive ligand-receptor interaction	Pard3	Pard3	Par-3 (Partitioning defective 3) homolog (C. elegans)	0.187052	0.620787	1.30405
PATH:04726	Serotonergic synapse	Prkacb	Prkacb	cAMP-dependent protein kinase catalytic subunit beta transcript variant 5	0.187557	0.620787	1.44923
PATH:04726	Serotonergic synapse	Kcnj3	Kcnj3	G protein-activated inward rectifier potassium channel 1	0.187557	0.620787	1.44923
PATH:04726	Serotonergic synapse	Cacna1d	Cacna1d	Cacna1d protein	0.187557	0.620787	1.44923
PATH:04726	Serotonergic synapse	Prkca	Prkca	Protein kinase C alpha type	0.187557	0.620787	1.44923
PATH:04726	Serotonergic synapse	Plcb4	Plcb4	Phosphoinositide phospholipase C	0.187557	0.620787	1.44923
PATH:04726	Serotonergic synapse	Gabrb2	Gabrb2	Gamma-aminobutyric acid receptor subunit beta-2	0.187557	0.620787	1.44923
PATH:04726	Serotonergic synapse	Pla2g10	Pla2g10	Phospholipase A(2)	0.187557	0.620787	1.44923
PATH:04726	Serotonergic synapse	Htr1f	Htr1f	5-hydroxytryptamine receptor 1F	0.187557	0.620787	1.44923
PATH:05161	Hepatitis B	Ddb2	Ddb2	DNA damage-binding protein 2	0.187557	0.620787	1.44923
PATH:05161	Hepatitis B	Tgfb3	Tgfb3	Transforming growth factor beta-3	0.187557	0.620787	1.44923
PATH:05161	Hepatitis B	Fos	Fos	Proto-oncogene c-Fos	0.187557	0.620787	1.44923
PATH:05161	Hepatitis B	D1Pas1	D1Pas1	DNA segment, Chr 1, Pasteur Institute 1	0.187557	0.620787	1.44923
PATH:05161	Hepatitis B	Prkca	Prkca	Protein kinase C alpha type	0.187557	0.620787	1.44923
PATH:05161	Hepatitis B	Akt2	Akt2	RAC-beta serine/threonine-protein kinase	0.187557	0.620787	1.44923
PATH:05161	Hepatitis B	Map3k1	Map3k1	Mitogen-activated protein kinase kinase kinase 1	0.187557	0.620787	1.44923
PATH:05161	Hepatitis B	Pik3cg	Pik3cg	Phosphoinositide-3-kinase gamma polypeptide	0.187557	0.620787	1.44923
PATH:03008	Ribosome biogenesis in eukaryotes	Nol6	Nol6	Putative uncharacterized protein	0.201683	0.633383	1.60167
PATH:03008	Ribosome biogenesis in eukaryotes	Cirh1a	Cirh1a	Putative uncharacterized protein	0.201683	0.633383	1.60167
PATH:03008	Ribosome biogenesis in eukaryotes	Mphosph10	Mphosph10	Mphosph10 protein	0.201683	0.633383	1.60167
PATH:03008	Ribosome biogenesis in eukaryotes	Fcf1	Fcf1	rRNA-processing protein FCF1 homolog	0.201683	0.633383	1.60167
PATH:03008	Ribosome biogenesis in eukaryotes	Utp18	Utp18	Putative uncharacterized protein	0.201683	0.633383	1.60167
PATH:00900	Terpenoid backbone biosynthesis	Pmvk	Pmvk	Phosphomevalonate kinase	0.203445	0.633383	2.38794
PATH:00900	Terpenoid backbone biosynthesis	Idi1	Idi1	Isopentenyl-diphosphate delta isomerase	0.203445	0.633383	2.38794
PATH:04664	Fc epsilon RI signaling pathway	Prkca	Prkca	Protein kinase C alpha type	0.208475	0.633383	1.58237
PATH:04664	Fc epsilon RI signaling pathway	Akt2	Akt2	RAC-beta serine/threonine-protein kinase	0.208475	0.633383	1.58237
PATH:04664	Fc epsilon RI signaling pathway	Prkce	Prkce	Protein kinase C epsilon type	0.208475	0.633383	1.58237
PATH:04664	Fc epsilon RI signaling pathway	Pla2g10	Pla2g10	Phospholipase A(2)	0.208475	0.633383	1.58237
PATH:04664	Fc epsilon RI signaling pathway	Pik3cg	Pik3cg	Phosphoinositide-3-kinase gamma polypeptide	0.208475	0.633383	1.58237
PATH:04975	Fat digestion and absorption	Abcg8	Abcg8	ATP-binding cassette sub-family G member 8	0.213976	0.633383	1.87624
PATH:04975	Fat digestion and absorption	Abca1	Abca1	ATP-binding cassette sub-family A member 1	0.213976	0.633383	1.87624
PATH:04975	Fat digestion and absorption	Pla2g10	Pla2g10	Phospholipase A(2)	0.213976	0.633383	1.87624
PATH:05410	Hypertrophic cardiomyopathy (HCM)	Cacna1d	Cacna1d	Cacna1d protein	0.215341	0.633383	1.56353
PATH:05410	Hypertrophic cardiomyopathy (HCM)	Itgav	Itgav	Integrin alpha-V	0.215341	0.633383	1.56353
PATH:05410	Hypertrophic cardiomyopathy (HCM)	Tgfb3	Tgfb3	Transforming growth factor beta-3	0.215341	0.633383	1.56353
PATH:05410	Hypertrophic cardiomyopathy (HCM)	Ttn	Ttn	Titin	0.215341	0.633383	1.56353
PATH:05410	Hypertrophic cardiomyopathy (HCM)	Ace	Ace	Angiotensin-converting enzyme	0.215341	0.633383	1.56353
PATH:04810	Regulation of actin cytoskeleton	Ssh1	Ssh1	Protein phosphatase Slingshot homolog 1	0.216904	0.633383	1.31337
PATH:04810	Regulation of actin cytoskeleton	Wasf2	Wasf2	Wiskott-Aldrich syndrome protein family member 2	0.216904	0.633383	1.31337
PATH:04810	Regulation of actin cytoskeleton	Itgav	Itgav	Integrin alpha-V	0.216904	0.633383	1.31337
PATH:04810	Regulation of actin cytoskeleton	Actn2	Actn2	Alpha-actinin-2	0.216904	0.633383	1.31337
PATH:04810	Regulation of actin cytoskeleton	Cdc42	Cdc42	Cell division control protein 42 homolog	0.216904	0.633383	1.31337
PATH:04810	Regulation of actin cytoskeleton	4930544G11Rik	4930544G11Rik	Testis specific expressed protein 5	0.216904	0.633383	1.31337
PATH:04810	Regulation of actin cytoskeleton	Chrm5	Chrm5	Muscarinic acetylcholine receptor M5	0.216904	0.633383	1.31337
PATH:04810	Regulation of actin cytoskeleton	Fgf9	Fgf9	Fibroblast growth factor 9	0.216904	0.633383	1.31337
PATH:04810	Regulation of actin cytoskeleton	Pik3cg	Pik3cg	Phosphoinositide-3-kinase gamma polypeptide	0.216904	0.633383	1.31337
PATH:04810	Regulation of actin cytoskeleton	Dock1	Dock1	Dedicator of cytokinesis protein 1	0.216904	0.633383	1.31337
PATH:04810	Regulation of actin cytoskeleton	Csk	Csk	Tyrosine-protein kinase CSK	0.216904	0.633383	1.31337
PATH:04261	Adrenergic signaling in cardiomyocytes	Prkacb	Prkacb	cAMP-dependent protein kinase catalytic subunit beta transcript variant 5	0.217226	0.633383	1.39165
PATH:04261	Adrenergic signaling in cardiomyocytes	Cacna1d	Cacna1d	Cacna1d protein	0.217226	0.633383	1.39165
PATH:04261	Adrenergic signaling in cardiomyocytes	Prkca	Prkca	Protein kinase C alpha type	0.217226	0.633383	1.39165
PATH:04261	Adrenergic signaling in cardiomyocytes	Akt2	Akt2	RAC-beta serine/threonine-protein kinase	0.217226	0.633383	1.39165
PATH:04261	Adrenergic signaling in cardiomyocytes	Agtr1a	Agtr1a	Type-1A angiotensin II receptor	0.217226	0.633383	1.39165
PATH:04261	Adrenergic signaling in cardiomyocytes	Plcb4	Plcb4	Phosphoinositide phospholipase C	0.217226	0.633383	1.39165
PATH:04261	Adrenergic signaling in cardiomyocytes	Pik3cg	Pik3cg	Phosphoinositide-3-kinase gamma polypeptide	0.217226	0.633383	1.39165
PATH:04261	Adrenergic signaling in cardiomyocytes	Rapgef4	Rapgef4	Rapgef4 protein	0.217226	0.633383	1.39165
PATH:05145	Toxoplasmosis	Il12b	Il12b	Interleukin-12 subunit beta	0.231668	0.633383	1.4036
PATH:05145	Toxoplasmosis	Tgfb3	Tgfb3	Transforming growth factor beta-3	0.231668	0.633383	1.4036
PATH:05145	Toxoplasmosis	Lama3	Lama3	Putative uncharacterized protein	0.231668	0.633383	1.4036
PATH:05145	Toxoplasmosis	Akt2	Akt2	RAC-beta serine/threonine-protein kinase	0.231668	0.633383	1.4036
PATH:05145	Toxoplasmosis	Map3k7	Map3k7	Mitogen-activated protein kinase kinase kinase 7	0.231668	0.633383	1.4036
PATH:05145	Toxoplasmosis	Pla2g10	Pla2g10	Phospholipase A(2)	0.231668	0.633383	1.4036
PATH:05145	Toxoplasmosis	Pik3cg	Pik3cg	Phosphoinositide-3-kinase gamma polypeptide	0.231668	0.633383	1.4036
PATH:04962	Vasopressin-regulated water reabsorption	Prkacb	Prkacb	cAMP-dependent protein kinase catalytic subunit beta transcript variant 5	0.234218	0.633383	1.79096
PATH:04962	Vasopressin-regulated water reabsorption	Dync1i2	Dync1i2	Cytoplasmic dynein 1 intermediate chain 2	0.234218	0.633383	1.79096
PATH:04962	Vasopressin-regulated water reabsorption	Aqp2	Aqp2	Aquaporin-2	0.234218	0.633383	1.79096
PATH:04960	Aldosterone-regulated sodium reabsorption	Prkca	Prkca	Protein kinase C alpha type	0.234218	0.633383	1.79096
PATH:04960	Aldosterone-regulated sodium reabsorption	Sgk1	Sgk1	Serine/threonine-protein kinase Sgk1	0.234218	0.633383	1.79096
PATH:04960	Aldosterone-regulated sodium reabsorption	Pik3cg	Pik3cg	Phosphoinositide-3-kinase gamma polypeptide	0.234218	0.633383	1.79096
PATH:03420	Nucleotide excision repair	Ddb2	Ddb2	DNA damage-binding protein 2	0.234218	0.633383	1.79096
PATH:03420	Nucleotide excision repair	Ercc6	Ercc6	Ercc6 protein	0.234218	0.633383	1.79096
PATH:03420	Nucleotide excision repair	Ercc5	Ercc5	Excision repair cross-complementing rodent repair deficiency, complementation group 5	0.234218	0.633383	1.79096
PATH:05214	Glioma	Prkca	Prkca	Protein kinase C alpha type	0.234251	0.633383	1.61645
PATH:05214	Glioma	Akt2	Akt2	RAC-beta serine/threonine-protein kinase	0.234251	0.633383	1.61645
PATH:05214	Glioma	Igf1r	Igf1r	Tyrosine-protein kinase receptor	0.234251	0.633383	1.61645
PATH:05214	Glioma	Pik3cg	Pik3cg	Phosphoinositide-3-kinase gamma polypeptide	0.234251	0.633383	1.61645
PATH:04911	Insulin secretion	Prkacb	Prkacb	cAMP-dependent protein kinase catalytic subunit beta transcript variant 5	0.236347	0.633383	1.50962
PATH:04911	Insulin secretion	Cacna1d	Cacna1d	Cacna1d protein	0.236347	0.633383	1.50962
PATH:04911	Insulin secretion	Prkca	Prkca	Protein kinase C alpha type	0.236347	0.633383	1.50962
PATH:04911	Insulin secretion	Plcb4	Plcb4	Phosphoinositide phospholipase C	0.236347	0.633383	1.50962
PATH:04911	Insulin secretion	Rapgef4	Rapgef4	Rapgef4 protein	0.236347	0.633383	1.50962
PATH:04210	Apoptosis	Ppp3ca	Ppp3ca	Serine/threonine-protein phosphatase 2B catalytic subunit alpha isoform	0.236347	0.633383	1.50962
PATH:04210	Apoptosis	Prkacb	Prkacb	cAMP-dependent protein kinase catalytic subunit beta transcript variant 5	0.236347	0.633383	1.50962
PATH:04210	Apoptosis	Akt2	Akt2	RAC-beta serine/threonine-protein kinase	0.236347	0.633383	1.50962
PATH:04210	Apoptosis	Ppp3r2	Ppp3r2	Protein phosphatase 3, regulatory subunit B, alpha isoform (Calcineurin B, type II)	0.236347	0.633383	1.50962
PATH:04210	Apoptosis	Pik3cg	Pik3cg	Phosphoinositide-3-kinase gamma polypeptide	0.236347	0.633383	1.50962
PATH:04066	HIF-1 signaling pathway	Hk1	Hk1	Hexokinase 1	0.241202	0.633383	1.43277
PATH:04066	HIF-1 signaling pathway	Prkca	Prkca	Protein kinase C alpha type	0.241202	0.633383	1.43277
PATH:04066	HIF-1 signaling pathway	Akt2	Akt2	RAC-beta serine/threonine-protein kinase	0.241202	0.633383	1.43277
PATH:04066	HIF-1 signaling pathway	Nox3	Nox3	NADPH oxidase 3	0.241202	0.633383	1.43277
PATH:04066	HIF-1 signaling pathway	Igf1r	Igf1r	Tyrosine-protein kinase receptor	0.241202	0.633383	1.43277
PATH:04066	HIF-1 signaling pathway	Pik3cg	Pik3cg	Phosphoinositide-3-kinase gamma polypeptide	0.241202	0.633383	1.43277
PATH:00564	Glycerophospholipid metabolism	Lpcat1	Lpcat1	Lysophosphatidylcholine acyltransferase 1	0.243474	0.633383	1.49246
PATH:00564	Glycerophospholipid metabolism	Lpin1	Lpin1	Phosphatidate phosphatase LPIN1	0.243474	0.633383	1.49246
PATH:00564	Glycerophospholipid metabolism	Pla2g10	Pla2g10	Phospholipase A(2)	0.243474	0.633383	1.49246
PATH:00564	Glycerophospholipid metabolism	Dgkq	Dgkq	Diacylglycerol kinase theta	0.243474	0.633383	1.49246
PATH:00564	Glycerophospholipid metabolism	Dgkz	Dgkz	Diacylglycerol kinase zeta	0.243474	0.633383	1.49246
PATH:04540	Gap junction	Prkacb	Prkacb	cAMP-dependent protein kinase catalytic subunit beta transcript variant 5	0.243474	0.633383	1.49246
PATH:04540	Gap junction	Prkca	Prkca	Protein kinase C alpha type	0.243474	0.633383	1.49246
PATH:04540	Gap junction	Prkg2	Prkg2	cGMP-dependent protein kinase	0.243474	0.633383	1.49246
PATH:04540	Gap junction	Plcb4	Plcb4	Phosphoinositide phospholipase C	0.243474	0.633383	1.49246
PATH:04540	Gap junction	Tjp1	Tjp1	Tjp1 protein	0.243474	0.633383	1.49246
PATH:00592	alpha-Linolenic acid metabolism	Acox1	Acox1	Peroxisomal acyl-coenzyme A oxidase 1	0.246049	0.633383	2.10139
PATH:00592	alpha-Linolenic acid metabolism	Pla2g10	Pla2g10	Phospholipase A(2)	0.246049	0.633383	2.10139
PATH:04727	GABAergic synapse	Prkacb	Prkacb	cAMP-dependent protein kinase catalytic subunit beta transcript variant 5	0.250658	0.633383	1.47569
PATH:04727	GABAergic synapse	Cacna1d	Cacna1d	Cacna1d protein	0.250658	0.633383	1.47569
PATH:04727	GABAergic synapse	Prkca	Prkca	Protein kinase C alpha type	0.250658	0.633383	1.47569
PATH:04727	GABAergic synapse	Gabrg1	Gabrg1	GABA-A receptor gamma-1 subunit	0.250658	0.633383	1.47569
PATH:04727	GABAergic synapse	Gabrb2	Gabrb2	Gamma-aminobutyric acid receptor subunit beta-2	0.250658	0.633383	1.47569
PATH:05222	Small cell lung cancer	Itgav	Itgav	Integrin alpha-V	0.250658	0.633383	1.47569
PATH:05222	Small cell lung cancer	Lama3	Lama3	Putative uncharacterized protein	0.250658	0.633383	1.47569
PATH:05222	Small cell lung cancer	Fhit	Fhit	Bis(5'-adenosyl)-triphosphatase	0.250658	0.633383	1.47569
PATH:05222	Small cell lung cancer	Akt2	Akt2	RAC-beta serine/threonine-protein kinase	0.250658	0.633383	1.47569
PATH:05222	Small cell lung cancer	Pik3cg	Pik3cg	Phosphoinositide-3-kinase gamma polypeptide	0.250658	0.633383	1.47569
PATH:05414	Dilated cardiomyopathy	Prkacb	Prkacb	cAMP-dependent protein kinase catalytic subunit beta transcript variant 5	0.250658	0.633383	1.47569
PATH:05414	Dilated cardiomyopathy	Cacna1d	Cacna1d	Cacna1d protein	0.250658	0.633383	1.47569
PATH:05414	Dilated cardiomyopathy	Itgav	Itgav	Integrin alpha-V	0.250658	0.633383	1.47569
PATH:05414	Dilated cardiomyopathy	Tgfb3	Tgfb3	Transforming growth factor beta-3	0.250658	0.633383	1.47569
PATH:05414	Dilated cardiomyopathy	Ttn	Ttn	Titin	0.250658	0.633383	1.47569
PATH:04350	TGF-beta signaling pathway	Tgfb3	Tgfb3	Transforming growth factor beta-3	0.250658	0.633383	1.47569
PATH:04350	TGF-beta signaling pathway	Id2	Id2	DNA-binding protein inhibitor ID-2	0.250658	0.633383	1.47569
PATH:04350	TGF-beta signaling pathway	Dcn	Dcn	Decorin	0.250658	0.633383	1.47569
PATH:04350	TGF-beta signaling pathway	4930544G11Rik	4930544G11Rik	Testis specific expressed protein 5	0.250658	0.633383	1.47569
PATH:04350	TGF-beta signaling pathway	Smad1	Smad1	Mothers against decapentaplegic homolog 1	0.250658	0.633383	1.47569
PATH:03022	Basal transcription factors	Gtf2e2	Gtf2e2	General transcription factor IIE subunit 2	0.254782	0.636955	1.71309
PATH:03022	Basal transcription factors	Gtf2a1l	Gtf2a1l	TFIIA-alpha and beta-like factor	0.254782	0.636955	1.71309
PATH:03022	Basal transcription factors	Gtf2a1	Gtf2a1	Gtf2a1 protein	0.254782	0.636955	1.71309
PATH:04622	RIG-I-like receptor signaling pathway	Il12b	Il12b	Interleukin-12 subunit beta	0.259324	0.641487	1.54514
PATH:04622	RIG-I-like receptor signaling pathway	D1Pas1	D1Pas1	DNA segment, Chr 1, Pasteur Institute 1	0.259324	0.641487	1.54514
PATH:04622	RIG-I-like receptor signaling pathway	Map3k1	Map3k1	Mitogen-activated protein kinase kinase kinase 1	0.259324	0.641487	1.54514
PATH:04622	RIG-I-like receptor signaling pathway	Map3k7	Map3k7	Mitogen-activated protein kinase kinase kinase 7	0.259324	0.641487	1.54514
PATH:04918	Thyroid hormone synthesis	Prkacb	Prkacb	cAMP-dependent protein kinase catalytic subunit beta transcript variant 5	0.284892	0.69302	1.47985
PATH:04918	Thyroid hormone synthesis	Prkca	Prkca	Protein kinase C alpha type	0.284892	0.69302	1.47985
PATH:04918	Thyroid hormone synthesis	Slc26a4	Slc26a4	Solute carrier family 26, member 4	0.284892	0.69302	1.47985
PATH:04918	Thyroid hormone synthesis	Plcb4	Plcb4	Phosphoinositide phospholipase C	0.284892	0.69302	1.47985
PATH:04330	Notch signaling pathway	Rbpjl	Rbpjl	Recombining binding protein suppressor of hairless-like protein	0.286055	0.69302	1.60821
PATH:04330	Notch signaling pathway	Ncstn	Ncstn	Nicastrin	0.286055	0.69302	1.60821
PATH:04330	Notch signaling pathway	Dtx3l	Dtx3l	Dtx3l protein	0.286055	0.69302	1.60821
PATH:04919	Thyroid hormone signaling pathway	Prkacb	Prkacb	cAMP-dependent protein kinase catalytic subunit beta transcript variant 5	0.293277	0.693174	1.33563
PATH:04919	Thyroid hormone signaling pathway	Itgav	Itgav	Integrin alpha-V	0.293277	0.693174	1.33563
PATH:04919	Thyroid hormone signaling pathway	Prkca	Prkca	Protein kinase C alpha type	0.293277	0.693174	1.33563
PATH:04919	Thyroid hormone signaling pathway	Akt2	Akt2	RAC-beta serine/threonine-protein kinase	0.293277	0.693174	1.33563
PATH:04919	Thyroid hormone signaling pathway	Plcb4	Plcb4	Phosphoinositide phospholipase C	0.293277	0.693174	1.33563
PATH:04919	Thyroid hormone signaling pathway	Pik3cg	Pik3cg	Phosphoinositide-3-kinase gamma polypeptide	0.293277	0.693174	1.33563
PATH:04976	Bile secretion	Prkacb	Prkacb	cAMP-dependent protein kinase catalytic subunit beta transcript variant 5	0.2935	0.693174	1.4593
PATH:04976	Bile secretion	Abcg8	Abcg8	ATP-binding cassette sub-family G member 8	0.2935	0.693174	1.4593
PATH:04976	Bile secretion	Sult2a3	Sult2a3	Sulfotransferase	0.2935	0.693174	1.4593
PATH:04976	Bile secretion	Slc4a4	Slc4a4	Slc4a4 protein	0.2935	0.693174	1.4593
PATH:00232	Caffeine metabolism	Nat2	Nat2	Arylamine N-acetyltransferase 2	0.294968	0.693174	2.9186
PATH:04917	Prolactin signaling pathway	Fos	Fos	Proto-oncogene c-Fos	0.310812	0.710852	1.41986
PATH:04917	Prolactin signaling pathway	Esr2	Esr2	Estrogen receptor beta	0.310812	0.710852	1.41986
PATH:04917	Prolactin signaling pathway	Akt2	Akt2	RAC-beta serine/threonine-protein kinase	0.310812	0.710852	1.41986
PATH:04917	Prolactin signaling pathway	Pik3cg	Pik3cg	Phosphoinositide-3-kinase gamma polypeptide	0.310812	0.710852	1.41986
PATH:05412	Arrhythmogenic right ventricular cardiomyopathy (ARVC)	Tcf7l2	Tcf7l2	Transcription factor 7-like 2	0.310812	0.710852	1.41986
PATH:05412	Arrhythmogenic right ventricular cardiomyopathy (ARVC)	Cacna1d	Cacna1d	Cacna1d protein	0.310812	0.710852	1.41986
PATH:05412	Arrhythmogenic right ventricular cardiomyopathy (ARVC)	Itgav	Itgav	Integrin alpha-V	0.310812	0.710852	1.41986
PATH:05412	Arrhythmogenic right ventricular cardiomyopathy (ARVC)	Actn2	Actn2	Alpha-actinin-2	0.310812	0.710852	1.41986
PATH:04650	Natural killer cell mediated cytotoxicity	Ppp3ca	Ppp3ca	Serine/threonine-protein phosphatase 2B catalytic subunit alpha isoform	0.313386	0.710852	1.30251
PATH:04650	Natural killer cell mediated cytotoxicity	Fcgr3	Fcgr3	Low affinity immunoglobulin gamma Fc region receptor III	0.313386	0.710852	1.30251
PATH:04650	Natural killer cell mediated cytotoxicity	Prkca	Prkca	Protein kinase C alpha type	0.313386	0.710852	1.30251
PATH:04650	Natural killer cell mediated cytotoxicity	Ppp3r2	Ppp3r2	Protein phosphatase 3, regulatory subunit B, alpha isoform (Calcineurin B, type II)	0.313386	0.710852	1.30251
PATH:04650	Natural killer cell mediated cytotoxicity	Pik3cg	Pik3cg	Phosphoinositide-3-kinase gamma polypeptide	0.313386	0.710852	1.30251
PATH:04650	Natural killer cell mediated cytotoxicity	Gzmb	Gzmb	Granzyme B(G,H)	0.313386	0.710852	1.30251
PATH:05216	Thyroid cancer	Tcf7l2	Tcf7l2	Transcription factor 7-like 2	0.317405	0.710852	1.75116
PATH:05216	Thyroid cancer	Ccdc6	Ccdc6	Coiled-coil domain-containing protein 6	0.317405	0.710852	1.75116
PATH:05213	Endometrial cancer	Tcf7l2	Tcf7l2	Transcription factor 7-like 2	0.317615	0.710852	1.51542
PATH:05213	Endometrial cancer	Akt2	Akt2	RAC-beta serine/threonine-protein kinase	0.317615	0.710852	1.51542
PATH:05213	Endometrial cancer	Pik3cg	Pik3cg	Phosphoinositide-3-kinase gamma polypeptide	0.317615	0.710852	1.51542
PATH:00130	Ubiquinone and other terpenoid-quinone biosynthesis	Coq7	Coq7	Ubiquinone biosynthesis protein COQ7 homolog	0.32184	0.713513	2.62674
PATH:00500	Starch and sucrose metabolism	Hk1	Hk1	Hexokinase 1	0.328157	0.71364	1.48683
PATH:00500	Starch and sucrose metabolism	Sis	Sis	Sucrase-isomaltase	0.328157	0.71364	1.48683
PATH:00500	Starch and sucrose metabolism	Pgm2	Pgm1	Phosphoglucomutase-2	0.328157	0.71364	1.48683
PATH:05322	Systemic lupus erythematosus	Hist4h4	Hist4h4	histone cluster 4, H4	0.333381	0.71364	1.24238
PATH:05322	Systemic lupus erythematosus	Gm14920	Gm14920	Histone H2A	0.333381	0.71364	1.24238
PATH:05322	Systemic lupus erythematosus	Fcgr3	Fcgr3	Low affinity immunoglobulin gamma Fc region receptor III	0.333381	0.71364	1.24238
PATH:05322	Systemic lupus erythematosus	Actn2	Actn2	Alpha-actinin-2	0.333381	0.71364	1.24238
PATH:05322	Systemic lupus erythematosus	H2bfm	H2bfm	Protein H2bfm	0.333381	0.71364	1.24238
PATH:05322	Systemic lupus erythematosus	Hist2h2ab	Hist2h2ab	Histone H2A type 2-B	0.333381	0.71364	1.24238
PATH:05322	Systemic lupus erythematosus	Hist1h2ab	Hist1h2ab	histone cluster 1, H2ab	0.333381	0.71364	1.24238
PATH:04970	Salivary secretion	Prkacb	Prkacb	cAMP-dependent protein kinase catalytic subunit beta transcript variant 5	0.336945	0.71364	1.36454
PATH:04970	Salivary secretion	Prkca	Prkca	Protein kinase C alpha type	0.336945	0.71364	1.36454
PATH:04970	Salivary secretion	Prkg2	Prkg2	cGMP-dependent protein kinase	0.336945	0.71364	1.36454
PATH:04970	Salivary secretion	Plcb4	Plcb4	Phosphoinositide phospholipase C	0.336945	0.71364	1.36454
PATH:04340	Hedgehog signaling pathway	Prkacb	Prkacb	cAMP-dependent protein kinase catalytic subunit beta transcript variant 5	0.338698	0.71364	1.4593
PATH:04340	Hedgehog signaling pathway	Gli2	Gli2	GLI-Kruppel family member	0.338698	0.71364	1.4593
PATH:04340	Hedgehog signaling pathway	Wnt2	Wnt2	Protein Wnt-2	0.338698	0.71364	1.4593
PATH:04620	Toll-like receptor signaling pathway	Il12b	Il12b	Interleukin-12 subunit beta	0.340049	0.71364	1.30036
PATH:04620	Toll-like receptor signaling pathway	Fos	Fos	Proto-oncogene c-Fos	0.340049	0.71364	1.30036
PATH:04620	Toll-like receptor signaling pathway	Akt2	Akt2	RAC-beta serine/threonine-protein kinase	0.340049	0.71364	1.30036
PATH:04620	Toll-like receptor signaling pathway	Map3k7	Map3k7	Mitogen-activated protein kinase kinase kinase 7	0.340049	0.71364	1.30036
PATH:04620	Toll-like receptor signaling pathway	Pik3cg	Pik3cg	Phosphoinositide-3-kinase gamma polypeptide	0.340049	0.71364	1.30036
PATH:00020	Citrate cycle (TCA cycle)	Sdhd	Sdhd	Succinate dehydrogenase [ubiquinone] cytochrome b small subunit, mitochondrial	0.345598	0.71364	1.64171
PATH:00020	Citrate cycle (TCA cycle)	Aco1	Aco1	Cytoplasmic aconitate hydratase	0.345598	0.71364	1.64171
PATH:04750	Inflammatory mediator regulation of TRP channels	Prkacb	Prkacb	cAMP-dependent protein kinase catalytic subunit beta transcript variant 5	0.347355	0.71364	1.25083
PATH:04750	Inflammatory mediator regulation of TRP channels	Prkca	Prkca	Protein kinase C alpha type	0.347355	0.71364	1.25083
PATH:04750	Inflammatory mediator regulation of TRP channels	Hrh1	Hrh1	Histamine H1 receptor	0.347355	0.71364	1.25083
PATH:04750	Inflammatory mediator regulation of TRP channels	Plcb4	Plcb4	Phosphoinositide phospholipase C	0.347355	0.71364	1.25083
PATH:04750	Inflammatory mediator regulation of TRP channels	Prkce	Prkce	Protein kinase C epsilon type	0.347355	0.71364	1.25083
PATH:04750	Inflammatory mediator regulation of TRP channels	Pik3cg	Pik3cg	Phosphoinositide-3-kinase gamma polypeptide	0.347355	0.71364	1.25083
PATH:04961	Endocrine and other factor-regulated calcium reabsorption	Prkacb	Prkacb	cAMP-dependent protein kinase catalytic subunit beta transcript variant 5	0.349228	0.71364	1.43277
PATH:04961	Endocrine and other factor-regulated calcium reabsorption	Prkca	Prkca	Protein kinase C alpha type	0.349228	0.71364	1.43277
PATH:04961	Endocrine and other factor-regulated calcium reabsorption	Plcb4	Plcb4	Phosphoinositide phospholipase C	0.349228	0.71364	1.43277
PATH:05217	Basal cell carcinoma	Tcf7l2	Tcf7l2	Transcription factor 7-like 2	0.349228	0.71364	1.43277
PATH:05217	Basal cell carcinoma	Gli2	Gli2	GLI-Kruppel family member	0.349228	0.71364	1.43277
PATH:05217	Basal cell carcinoma	Wnt2	Wnt2	Protein Wnt-2	0.349228	0.71364	1.43277
PATH:05152	Tuberculosis	Ppp3ca	Ppp3ca	Serine/threonine-protein phosphatase 2B catalytic subunit alpha isoform	0.36687	0.739637	1.18056
PATH:05152	Tuberculosis	Pik3c3	Pik3c3	Phosphatidylinositol 3-kinase catalytic subunit type 3	0.36687	0.739637	1.18056
PATH:05152	Tuberculosis	Fcgr3	Fcgr3	Low affinity immunoglobulin gamma Fc region receptor III	0.36687	0.739637	1.18056
PATH:05152	Tuberculosis	Il12b	Il12b	Interleukin-12 subunit beta	0.36687	0.739637	1.18056
PATH:05152	Tuberculosis	Tgfb3	Tgfb3	Transforming growth factor beta-3	0.36687	0.739637	1.18056
PATH:05152	Tuberculosis	4930544G11Rik	4930544G11Rik	Testis specific expressed protein 5	0.36687	0.739637	1.18056
PATH:05152	Tuberculosis	Akt2	Akt2	RAC-beta serine/threonine-protein kinase	0.36687	0.739637	1.18056
PATH:05152	Tuberculosis	Ppp3r2	Ppp3r2	Protein phosphatase 3, regulatory subunit B, alpha isoform (Calcineurin B, type II)	0.36687	0.739637	1.18056
PATH:04932	Non-alcoholic fatty liver disease (NAFLD)	Cox7c	Cox7c	Cytochrome c oxidase subunit 7C, mitochondrial	0.370916	0.739637	1.19397
PATH:04932	Non-alcoholic fatty liver disease (NAFLD)	Cdc42	Cdc42	Cell division control protein 42 homolog	0.370916	0.739637	1.19397
PATH:04932	Non-alcoholic fatty liver disease (NAFLD)	Xbp1	Xbp1	X-box-binding protein 1	0.370916	0.739637	1.19397
PATH:04932	Non-alcoholic fatty liver disease (NAFLD)	Akt2	Akt2	RAC-beta serine/threonine-protein kinase	0.370916	0.739637	1.19397
PATH:04932	Non-alcoholic fatty liver disease (NAFLD)	Sdhd	Sdhd	Succinate dehydrogenase [ubiquinone] cytochrome b small subunit, mitochondrial	0.370916	0.739637	1.19397
PATH:04932	Non-alcoholic fatty liver disease (NAFLD)	Pik3cg	Pik3cg	Phosphoinositide-3-kinase gamma polypeptide	0.370916	0.739637	1.19397
PATH:04932	Non-alcoholic fatty liver disease (NAFLD)	Ndufs4	Ndufs4	NADH dehydrogenase [ubiquinone] iron-sulfur protein 4, mitochondrial	0.370916	0.739637	1.19397
PATH:05010	Alzheimer's disease	Ppp3ca	Ppp3ca	Serine/threonine-protein phosphatase 2B catalytic subunit alpha isoform	0.372701	0.739637	1.17396
PATH:05010	Alzheimer's disease	Cox7c	Cox7c	Cytochrome c oxidase subunit 7C, mitochondrial	0.372701	0.739637	1.17396
PATH:05010	Alzheimer's disease	Cacna1d	Cacna1d	Cacna1d protein	0.372701	0.739637	1.17396
PATH:05010	Alzheimer's disease	Ncstn	Ncstn	Nicastrin	0.372701	0.739637	1.17396
PATH:05010	Alzheimer's disease	Sdhd	Sdhd	Succinate dehydrogenase [ubiquinone] cytochrome b small subunit, mitochondrial	0.372701	0.739637	1.17396
PATH:05010	Alzheimer's disease	Plcb4	Plcb4	Phosphoinositide phospholipase C	0.372701	0.739637	1.17396
PATH:05010	Alzheimer's disease	Ppp3r2	Ppp3r2	Protein phosphatase 3, regulatory subunit B, alpha isoform (Calcineurin B, type II)	0.372701	0.739637	1.17396
PATH:05010	Alzheimer's disease	Ndufs4	Ndufs4	NADH dehydrogenase [ubiquinone] iron-sulfur protein 4, mitochondrial	0.372701	0.739637	1.17396
PATH:04146	Peroxisome	Pex11a	Pex11a	Putative uncharacterized protein	0.38063	0.739637	1.28133
PATH:04146	Peroxisome	Gstk1	Gstk1	Glutathione S-transferase kappa 1	0.38063	0.739637	1.28133
PATH:04146	Peroxisome	Pmvk	Pmvk	Phosphomevalonate kinase	0.38063	0.739637	1.28133
PATH:04146	Peroxisome	Acox1	Acox1	Peroxisomal acyl-coenzyme A oxidase 1	0.38063	0.739637	1.28133
PATH:04611	Platelet activation	Prkacb	Prkacb	cAMP-dependent protein kinase catalytic subunit beta transcript variant 5	0.381639	0.739637	1.20309
PATH:04611	Platelet activation	4930544G11Rik	4930544G11Rik	Testis specific expressed protein 5	0.381639	0.739637	1.20309
PATH:04611	Platelet activation	Prkg2	Prkg2	cGMP-dependent protein kinase	0.381639	0.739637	1.20309
PATH:04611	Platelet activation	Akt2	Akt2	RAC-beta serine/threonine-protein kinase	0.381639	0.739637	1.20309
PATH:04611	Platelet activation	Plcb4	Plcb4	Phosphoinositide phospholipase C	0.381639	0.739637	1.20309
PATH:04611	Platelet activation	Pik3cg	Pik3cg	Phosphoinositide-3-kinase gamma polypeptide	0.381639	0.739637	1.20309
PATH:04630	Jak-STAT signaling pathway	Il12b	Il12b	Interleukin-12 subunit beta	0.383501	0.739637	1.17866
PATH:04630	Jak-STAT signaling pathway	Ccnd3	Ccnd3	G1/S-specific cyclin-D3	0.383501	0.739637	1.17866
PATH:04630	Jak-STAT signaling pathway	Il6st	Il6st	Interleukin-6 signal transductor	0.383501	0.739637	1.17866
PATH:04630	Jak-STAT signaling pathway	Akt2	Akt2	RAC-beta serine/threonine-protein kinase	0.383501	0.739637	1.17866
PATH:04630	Jak-STAT signaling pathway	Cblc	Cblc	Casitas B-lineage lymphoma c, isoform CRA_b	0.383501	0.739637	1.17866
PATH:04630	Jak-STAT signaling pathway	Spry2	Spry2	Sprouty homolog 2 (Drosophila)	0.383501	0.739637	1.17866
PATH:04630	Jak-STAT signaling pathway	Pik3cg	Pik3cg	Phosphoinositide-3-kinase gamma polypeptide	0.383501	0.739637	1.17866
PATH:04972	Pancreatic secretion	4930544G11Rik	4930544G11Rik	Testis specific expressed protein 5	0.385823	0.739637	1.22745
PATH:04972	Pancreatic secretion	Prkca	Prkca	Protein kinase C alpha type	0.385823	0.739637	1.22745
PATH:04972	Pancreatic secretion	Plcb4	Plcb4	Phosphoinositide phospholipase C	0.385823	0.739637	1.22745
PATH:04972	Pancreatic secretion	Pla2g10	Pla2g10	Phospholipase A(2)	0.385823	0.739637	1.22745
PATH:04972	Pancreatic secretion	Slc4a4	Slc4a4	Slc4a4 protein	0.385823	0.739637	1.22745
PATH:05340	Primary immunodeficiency	Cd4	Cd4	T4 surface glycoprotein	0.387129	0.739637	1.50099
PATH:05340	Primary immunodeficiency	Aicda	Aicda	Single-stranded DNA cytosine deaminase	0.387129	0.739637	1.50099
PATH:00790	Folate biosynthesis	Alpl	Alpl	Alkaline phosphatase, tissue-nonspecific isozyme	0.396486	0.742149	2.02057
PATH:03450	Non-homologous end-joining	Prkdc	Prkdc	DNA-dependent protein kinase catalytic subunit	0.396486	0.742149	2.02057
PATH:05323	Rheumatoid arthritis	Tgfb3	Tgfb3	Transforming growth factor beta-3	0.398048	0.742149	1.25083
PATH:05323	Rheumatoid arthritis	Fos	Fos	Proto-oncogene c-Fos	0.398048	0.742149	1.25083
PATH:05323	Rheumatoid arthritis	Vegfb	Vegfb	Vascular endothelial growth factor B	0.398048	0.742149	1.25083
PATH:05323	Rheumatoid arthritis	Tnfsf13b	Tnfsf13b	Tumor necrosis factor (Ligand) superfamily, member 13b, isoform CRA_a	0.398048	0.742149	1.25083
PATH:04668	TNF signaling pathway	Fos	Fos	Proto-oncogene c-Fos	0.401076	0.742149	1.20492
PATH:04668	TNF signaling pathway	Akt2	Akt2	RAC-beta serine/threonine-protein kinase	0.401076	0.742149	1.20492
PATH:04668	TNF signaling pathway	Map3k7	Map3k7	Mitogen-activated protein kinase kinase kinase 7	0.401076	0.742149	1.20492
PATH:04668	TNF signaling pathway	Pik3cg	Pik3cg	Phosphoinositide-3-kinase gamma polypeptide	0.401076	0.742149	1.20492
PATH:04668	TNF signaling pathway	Magi2	Magi2	Putative uncharacterized protein	0.401076	0.742149	1.20492
PATH:04722	Neurotrophin signaling pathway	Cdc42	Cdc42	Cell division control protein 42 homolog	0.409111	0.745279	1.16744
PATH:04722	Neurotrophin signaling pathway	4930544G11Rik	4930544G11Rik	Testis specific expressed protein 5	0.409111	0.745279	1.16744
PATH:04722	Neurotrophin signaling pathway	Akt2	Akt2	RAC-beta serine/threonine-protein kinase	0.409111	0.745279	1.16744
PATH:04722	Neurotrophin signaling pathway	Map3k1	Map3k1	Mitogen-activated protein kinase kinase kinase 1	0.409111	0.745279	1.16744
PATH:04722	Neurotrophin signaling pathway	Pik3cg	Pik3cg	Phosphoinositide-3-kinase gamma polypeptide	0.409111	0.745279	1.16744
PATH:04722	Neurotrophin signaling pathway	Csk	Csk	Tyrosine-protein kinase CSK	0.409111	0.745279	1.16744
PATH:04068	FoxO signaling pathway	Tgfb3	Tgfb3	Transforming growth factor beta-3	0.409111	0.745279	1.16744
PATH:04068	FoxO signaling pathway	Sirt1	Sirt1	Sirt1 protein	0.409111	0.745279	1.16744
PATH:04068	FoxO signaling pathway	Akt2	Akt2	RAC-beta serine/threonine-protein kinase	0.409111	0.745279	1.16744
PATH:04068	FoxO signaling pathway	Igf1r	Igf1r	Tyrosine-protein kinase receptor	0.409111	0.745279	1.16744
PATH:04068	FoxO signaling pathway	Sgk1	Sgk1	Serine/threonine-protein kinase Sgk1	0.409111	0.745279	1.16744
PATH:04068	FoxO signaling pathway	Pik3cg	Pik3cg	Phosphoinositide-3-kinase gamma polypeptide	0.409111	0.745279	1.16744
PATH:05162	Measles	Il12b	Il12b	Interleukin-12 subunit beta	0.422815	0.76432	1.1504
PATH:05162	Measles	Ccnd3	Ccnd3	G1/S-specific cyclin-D3	0.422815	0.76432	1.1504
PATH:05162	Measles	Akt2	Akt2	RAC-beta serine/threonine-protein kinase	0.422815	0.76432	1.1504
PATH:05162	Measles	Map3k7	Map3k7	Mitogen-activated protein kinase kinase kinase 7	0.422815	0.76432	1.1504
PATH:05162	Measles	Eif2ak4	Eif2ak4	Eukaryotic translation initiation factor 2-alpha kinase 4	0.422815	0.76432	1.1504
PATH:05162	Measles	Pik3cg	Pik3cg	Phosphoinositide-3-kinase gamma polypeptide	0.422815	0.76432	1.1504
PATH:00565	Ether lipid metabolism	Lpcat1	Lpcat1	Lysophosphatidylcholine acyltransferase 1	0.427469	0.766834	1.38249
PATH:00565	Ether lipid metabolism	Pla2g10	Pla2g10	Phospholipase A(2)	0.427469	0.766834	1.38249
PATH:05215	Prostate cancer	Tcf7l2	Tcf7l2	Transcription factor 7-like 2	0.441171	0.780345	1.18056
PATH:05215	Prostate cancer	Akt2	Akt2	RAC-beta serine/threonine-protein kinase	0.441171	0.780345	1.18056
PATH:05215	Prostate cancer	Igf1r	Igf1r	Tyrosine-protein kinase receptor	0.441171	0.780345	1.18056
PATH:05215	Prostate cancer	Pik3cg	Pik3cg	Phosphoinositide-3-kinase gamma polypeptide	0.441171	0.780345	1.18056
PATH:00604	Glycosphingolipid biosynthesis - ganglio series	St6galnac5	St6galnac5	Alpha-N-acetylgalactosaminide alpha-2,6-sialyltransferase 5	0.441642	0.780345	1.75116
PATH:00983	Drug metabolism - other enzymes	Cyp3a41a	Cyp3a41a	Cytochrome P450 3A41	0.452507	0.783758	1.21234
PATH:00983	Drug metabolism - other enzymes	Nat2	Nat2	Arylamine N-acetyltransferase 2	0.452507	0.783758	1.21234
PATH:00983	Drug metabolism - other enzymes	Tk2	Tk2	Thymidine kinase 2, mitochondrial, isoform CRA_b	0.452507	0.783758	1.21234
PATH:05206	MicroRNAs in cancer	Tnr	Tnr	Tenascin-R	0.453026	0.783758	1.07015
PATH:05206	MicroRNAs in cancer	4930544G11Rik	4930544G11Rik	Testis specific expressed protein 5	0.453026	0.783758	1.07015
PATH:05206	MicroRNAs in cancer	Sirt1	Sirt1	Sirt1 protein	0.453026	0.783758	1.07015
PATH:05206	MicroRNAs in cancer	Prkca	Prkca	Protein kinase C alpha type	0.453026	0.783758	1.07015
PATH:05206	MicroRNAs in cancer	Hnrnpk	Hnrnpk	Heterogeneous nuclear ribonucleoprotein K	0.453026	0.783758	1.07015
PATH:05206	MicroRNAs in cancer	Spry2	Spry2	Sprouty homolog 2 (Drosophila)	0.453026	0.783758	1.07015
PATH:05206	MicroRNAs in cancer	Prkce	Prkce	Protein kinase C epsilon type	0.453026	0.783758	1.07015
PATH:05206	MicroRNAs in cancer	Mir423	Mir423	microRNA 423	0.453026	0.783758	1.07015
PATH:05206	MicroRNAs in cancer	Mir28a	Mir28a	microRNA 28a	0.453026	0.783758	1.07015
PATH:05206	MicroRNAs in cancer	Reck	Reck	Reck protein	0.453026	0.783758	1.07015
PATH:05206	MicroRNAs in cancer	Rptor	Rptor	Regulatory-associated protein of mTOR	0.453026	0.783758	1.07015
PATH:05033	Nicotine addiction	Gabrg1	Gabrg1	GABA-A receptor gamma-1 subunit	0.453579	0.783758	1.31337
PATH:05033	Nicotine addiction	Gabrb2	Gabrb2	Gamma-aminobutyric acid receptor subunit beta-2	0.453579	0.783758	1.31337
PATH:04910	Insulin signaling pathway	Prkacb	Prkacb	cAMP-dependent protein kinase catalytic subunit beta transcript variant 5	0.46362	0.791078	1.10213
PATH:04910	Insulin signaling pathway	Hk1	Hk1	Hexokinase 1	0.46362	0.791078	1.10213
PATH:04910	Insulin signaling pathway	Akt2	Akt2	RAC-beta serine/threonine-protein kinase	0.46362	0.791078	1.10213
PATH:04910	Insulin signaling pathway	Cblc	Cblc	Casitas B-lineage lymphoma c, isoform CRA_b	0.46362	0.791078	1.10213
PATH:04910	Insulin signaling pathway	Pik3cg	Pik3cg	Phosphoinositide-3-kinase gamma polypeptide	0.46362	0.791078	1.10213
PATH:04910	Insulin signaling pathway	Rptor	Rptor	Regulatory-associated protein of mTOR	0.46362	0.791078	1.10213
PATH:05204	Chemical carcinogenesis	Gstk1	Gstk1	Glutathione S-transferase kappa 1	0.466618	0.791078	1.14206
PATH:05204	Chemical carcinogenesis	Cyp3a41a	Cyp3a41a	Cytochrome P450 3A41	0.466618	0.791078	1.14206
PATH:05204	Chemical carcinogenesis	Sult2a3	Sult2a3	Sulfotransferase	0.466618	0.791078	1.14206
PATH:05204	Chemical carcinogenesis	Nat2	Nat2	Arylamine N-acetyltransferase 2	0.466618	0.791078	1.14206
PATH:05164	Influenza A	Il12b	Il12b	Interleukin-12 subunit beta	0.47128	0.791078	1.0816
PATH:05164	Influenza A	Il33	Il33	Interleukin-33	0.47128	0.791078	1.0816
PATH:05164	Influenza A	Prkca	Prkca	Protein kinase C alpha type	0.47128	0.791078	1.0816
PATH:05164	Influenza A	Akt2	Akt2	RAC-beta serine/threonine-protein kinase	0.47128	0.791078	1.0816
PATH:05164	Influenza A	Eif2ak4	Eif2ak4	Eukaryotic translation initiation factor 2-alpha kinase 4	0.47128	0.791078	1.0816
PATH:05164	Influenza A	Pik3cg	Pik3cg	Phosphoinositide-3-kinase gamma polypeptide	0.47128	0.791078	1.0816
PATH:05164	Influenza A	Ivns1abp	Ivns1abp	Influenza virus NS1A-binding protein homolog	0.47128	0.791078	1.0816
PATH:03013	RNA transport	Gm5415	Gm5415	Protein Gm5415	0.47128	0.791078	1.0816
PATH:03013	RNA transport	Nup107	Nup107	Nuclear pore complex protein Nup107	0.47128	0.791078	1.0816
PATH:03013	RNA transport	Eif4g2	Eif4g2	Eukaryotic translation initiation factor 4, gamma 2, isoform CRA_e	0.47128	0.791078	1.0816
PATH:03013	RNA transport	Upf2	Upf2	UPF2 regulator of nonsense transcripts homolog (Yeast)	0.47128	0.791078	1.0816
PATH:03013	RNA transport	Eif2b2	Eif2b2	Translation initiation factor eIF-2B subunit beta	0.47128	0.791078	1.0816
PATH:03013	RNA transport	Nup37	Nup37	Nucleoporin Nup37	0.47128	0.791078	1.0816
PATH:03013	RNA transport	Nup160	Nup160	Nuclear pore complex protein Nup160	0.47128	0.791078	1.0816
PATH:00920	Sulfur metabolism	Chst11	Chst11	Uncharacterized protein	0.48343	0.805717	1.54514
PATH:04145	Phagosome	Pik3c3	Pik3c3	Phosphatidylinositol 3-kinase catalytic subunit type 3	0.489779	0.807596	1.06284
PATH:04145	Phagosome	Fcgr3	Fcgr3	Low affinity immunoglobulin gamma Fc region receptor III	0.489779	0.807596	1.06284
PATH:04145	Phagosome	Itgav	Itgav	Integrin alpha-V	0.489779	0.807596	1.06284
PATH:04145	Phagosome	Mbl2	Mbl2	Mannose-binding protein C	0.489779	0.807596	1.06284
PATH:04145	Phagosome	Dync1i2	Dync1i2	Cytoplasmic dynein 1 intermediate chain 2	0.489779	0.807596	1.06284
PATH:04145	Phagosome	Nox3	Nox3	NADPH oxidase 3	0.489779	0.807596	1.06284
PATH:04145	Phagosome	Msr1	Msr1	Macrophage scavenger receptor types I and II	0.489779	0.807596	1.06284
PATH:03015	mRNA surveillance pathway	Fip1l1	Fip1l1	Pre-mRNA 3'-end-processing factor FIP1	0.491643	0.807596	1.10599
PATH:03015	mRNA surveillance pathway	Pcf11	Pcf11	PCF11	0.491643	0.807596	1.10599
PATH:03015	mRNA surveillance pathway	Upf2	Upf2	UPF2 regulator of nonsense transcripts homolog (Yeast)	0.491643	0.807596	1.10599
PATH:03015	mRNA surveillance pathway	Cstf2t	Cstf2t	Cleavage stimulation factor subunit 2 tau variant	0.491643	0.807596	1.10599
PATH:04062	Chemokine signaling pathway	Prkacb	Prkacb	cAMP-dependent protein kinase catalytic subunit beta transcript variant 5	0.494867	0.807596	1.05069
PATH:04062	Chemokine signaling pathway	Cdc42	Cdc42	Cell division control protein 42 homolog	0.494867	0.807596	1.05069
PATH:04062	Chemokine signaling pathway	4930544G11Rik	4930544G11Rik	Testis specific expressed protein 5	0.494867	0.807596	1.05069
PATH:04062	Chemokine signaling pathway	Akt2	Akt2	RAC-beta serine/threonine-protein kinase	0.494867	0.807596	1.05069
PATH:04062	Chemokine signaling pathway	Plcb4	Plcb4	Phosphoinositide phospholipase C	0.494867	0.807596	1.05069
PATH:04062	Chemokine signaling pathway	Pik3cg	Pik3cg	Phosphoinositide-3-kinase gamma polypeptide	0.494867	0.807596	1.05069
PATH:04062	Chemokine signaling pathway	Csk	Csk	Tyrosine-protein kinase CSK	0.494867	0.807596	1.05069
PATH:04062	Chemokine signaling pathway	Pard3	Pard3	Par-3 (Partitioning defective 3) homolog (C. elegans)	0.494867	0.807596	1.05069
PATH:01210	2-Oxocarboxylic acid metabolism	Aco1	Aco1	Cytoplasmic aconitate hydratase	0.522101	0.846163	1.38249
PATH:04672	Intestinal immune network for IgA production	Aicda	Aicda	Single-stranded DNA cytosine deaminase	0.527601	0.846912	1.14206
PATH:04672	Intestinal immune network for IgA production	Tnfsf13b	Tnfsf13b	Tumor necrosis factor (Ligand) superfamily, member 13b, isoform CRA_a	0.527601	0.846912	1.14206
PATH:04514	Cell adhesion molecules (CAMs)	Cd4	Cd4	T4 surface glycoprotein	0.529771	0.846912	1.03009
PATH:04514	Cell adhesion molecules (CAMs)	Itgav	Itgav	Integrin alpha-V	0.529771	0.846912	1.03009
PATH:04514	Cell adhesion molecules (CAMs)	Nlgn1	Nlgn1	Neuroligin-1	0.529771	0.846912	1.03009
PATH:04514	Cell adhesion molecules (CAMs)	Mpzl1	Mpzl1	Myelin protein zero-like protein 1	0.529771	0.846912	1.03009
PATH:04514	Cell adhesion molecules (CAMs)	Negr1	Negr1	Neuronal growth regulator 1	0.529771	0.846912	1.03009
PATH:04514	Cell adhesion molecules (CAMs)	Cdh5	Cdh5	Cadherin-5	0.529771	0.846912	1.03009
PATH:04971	Gastric acid secretion	Prkacb	Prkacb	cAMP-dependent protein kinase catalytic subunit beta transcript variant 5	0.539325	0.850613	1.06489
PATH:04971	Gastric acid secretion	Prkca	Prkca	Protein kinase C alpha type	0.539325	0.850613	1.06489
PATH:04971	Gastric acid secretion	Plcb4	Plcb4	Phosphoinositide phospholipase C	0.539325	0.850613	1.06489
PATH:05133	Pertussis	Il12b	Il12b	Interleukin-12 subunit beta	0.539325	0.850613	1.06489
PATH:05133	Pertussis	Fos	Fos	Proto-oncogene c-Fos	0.539325	0.850613	1.06489
PATH:05133	Pertussis	4930544G11Rik	4930544G11Rik	Testis specific expressed protein 5	0.539325	0.850613	1.06489
PATH:00071	Fatty acid degradation	Acox1	Acox1	Peroxisomal acyl-coenzyme A oxidase 1	0.55073	0.86281	1.09447
PATH:00071	Fatty acid degradation	Eci1	Eci1	Enoyl-CoA delta isomerase 1, mitochondrial	0.55073	0.86281	1.09447
PATH:00514	Other types of O-glycan biosynthesis	B3glct	B3glct	Beta-1,3-glucosyltransferase	0.561992	0.871417	1.07214
PATH:00514	Other types of O-glycan biosynthesis	Pofut2	Pofut2	Protein O-fucosyltransferase 2, isoform CRA_b	0.561992	0.871417	1.07214
PATH:00310	Lysine degradation	Setdb2	Setdb2	Histone-lysine N-methyltransferase SETDB2	0.573052	0.871417	1.05069
PATH:00310	Lysine degradation	Suv39h2	Suv39h2	Histone-lysine N-methyltransferase SUV39H2	0.573052	0.871417	1.05069
PATH:00510	N-Glycan biosynthesis	Mgat4a	Mgat4a	Alpha-1,3-mannosyl-glycoprotein 4-beta-N-acetylglucosaminyltransferase A	0.573052	0.871417	1.05069
PATH:00510	N-Glycan biosynthesis	Tusc3	Tusc3	Putative uncharacterized protein	0.573052	0.871417	1.05069
PATH:04964	Proximal tubule bicarbonate reclamation	Slc4a4	Slc4a4	Slc4a4 protein	0.574764	0.871417	1.19397
PATH:00532	Glycosaminoglycan biosynthesis - chondroitin sulfate / dermatan sulfate	Chst11	Chst11	Uncharacterized protein	0.574764	0.871417	1.19397
PATH:00240	Pyrimidine metabolism	Nme6	Nme6	Nucleoside diphosphate kinase 6	0.578707	0.871771	0.991221
PATH:00240	Pyrimidine metabolism	Tyms	Tyms	Thymidylate synthase, isoform CRA_b	0.578707	0.871771	0.991221
PATH:00240	Pyrimidine metabolism	Tk2	Tk2	Thymidine kinase 2, mitochondrial, isoform CRA_b	0.578707	0.871771	0.991221
PATH:00240	Pyrimidine metabolism	Nme4	Nme4	Nucleoside diphosphate kinase	0.578707	0.871771	0.991221
PATH:05150	Staphylococcus aureus infection	Fcgr3	Fcgr3	Low affinity immunoglobulin gamma Fc region receptor III	0.583908	0.874003	1.03009
PATH:05150	Staphylococcus aureus infection	Mbl2	Mbl2	Mannose-binding protein C	0.583908	0.874003	1.03009
PATH:05330	Allograft rejection	Il12b	Il12b	Interleukin-12 subunit beta	0.59456	0.878752	1.01028
PATH:05330	Allograft rejection	Gzmb	Gzmb	Granzyme B(G,H)	0.59456	0.878752	1.01028
PATH:00591	Linoleic acid metabolism	Cyp3a41a	Cyp3a41a	Cytochrome P450 3A41	0.59456	0.878752	1.01028
PATH:00591	Linoleic acid metabolism	Pla2g10	Pla2g10	Phospholipase A(2)	0.59456	0.878752	1.01028
PATH:03018	RNA degradation	Btg3	Btg3	B cell translocation gene 3	0.601125	0.882902	0.972865
PATH:03018	RNA degradation	Cnot6l	Cnot6l	CCR4-NOT transcription complex subunit 6-like	0.601125	0.882902	0.972865
PATH:03018	RNA degradation	Mphosph6	Mphosph6	M-phase phosphoprotein 6	0.601125	0.882902	0.972865
PATH:00601	Glycosphingolipid biosynthesis - lacto and neolacto series	Gcnt2	Gcnt2	Beta-1,6-N-acetylglucosaminyltransferase B	0.606618	0.885437	1.09447
PATH:00563	Glycosylphosphatidylinositol(GPI)-anchor biosynthesis	Pigyl	Pigyl	Phosphatidylinositol N-acetylglucosaminyltransferase subunit Y	0.621642	0.892578	1.05069
PATH:01040	Biosynthesis of unsaturated fatty acids	Acox1	Acox1	Peroxisomal acyl-coenzyme A oxidase 1	0.621642	0.892578	1.05069
PATH:04141	Protein processing in endoplasmic reticulum	Xbp1	Xbp1	X-box-binding protein 1	0.627756	0.892578	0.932569
PATH:04141	Protein processing in endoplasmic reticulum	Ssr2	Ssr2	Signal sequence receptor, beta, isoform CRA_b	0.627756	0.892578	0.932569
PATH:04141	Protein processing in endoplasmic reticulum	Dnajc1	Dnajc1	DnaJ homolog subfamily C member 1	0.627756	0.892578	0.932569
PATH:04141	Protein processing in endoplasmic reticulum	Nploc4	Nploc4	Nuclear protein localization protein 4 homolog	0.627756	0.892578	0.932569
PATH:04141	Protein processing in endoplasmic reticulum	Eif2ak4	Eif2ak4	Eukaryotic translation initiation factor 2-alpha kinase 4	0.627756	0.892578	0.932569
PATH:04141	Protein processing in endoplasmic reticulum	Tusc3	Tusc3	Putative uncharacterized protein	0.627756	0.892578	0.932569
PATH:00190	Oxidative phosphorylation	Cox7c	Cox7c	Cytochrome c oxidase subunit 7C, mitochondrial	0.627876	0.892578	0.931467
PATH:00190	Oxidative phosphorylation	Sdhd	Sdhd	Succinate dehydrogenase [ubiquinone] cytochrome b small subunit, mitochondrial	0.627876	0.892578	0.931467
PATH:00190	Oxidative phosphorylation	Ppa1	Ppa1	Putative uncharacterized protein	0.627876	0.892578	0.931467
PATH:00190	Oxidative phosphorylation	Ndufs4	Ndufs4	NADH dehydrogenase [ubiquinone] iron-sulfur protein 4, mitochondrial	0.627876	0.892578	0.931467
PATH:00190	Oxidative phosphorylation	Atp12a	Atp12a	Potassium-transporting ATPase alpha chain 2	0.627876	0.892578	0.931467
PATH:05014	Amyotrophic lateral sclerosis (ALS)	Ppp3ca	Ppp3ca	Serine/threonine-protein phosphatase 2B catalytic subunit alpha isoform	0.635124	0.892578	0.93812
PATH:05014	Amyotrophic lateral sclerosis (ALS)	Ppp3r2	Ppp3r2	Protein phosphatase 3, regulatory subunit B, alpha isoform (Calcineurin B, type II)	0.635124	0.892578	0.93812
PATH:04950	Maturity onset diabetes of the young	Mnx1	Mnx1	Homeobox gene HB9	0.636094	0.892578	1.01028
PATH:04966	Collecting duct acid secretion	Slc4a1	Slc4a1	Band 3 anion transport protein	0.649996	0.892578	0.972865
PATH:03060	Protein export	Sec11c	Sec11c	Signal peptidase complex catalytic subunit SEC11C	0.649996	0.892578	0.972865
PATH:04913	Ovarian steroidogenesis	Prkacb	Prkacb	cAMP-dependent protein kinase catalytic subunit beta transcript variant 5	0.654187	0.892578	0.905771
PATH:04913	Ovarian steroidogenesis	Igf1r	Igf1r	Tyrosine-protein kinase receptor	0.654187	0.892578	0.905771
PATH:00340	Histidine metabolism	Hnmt	Hnmt	Histamine N-methyltransferase	0.663368	0.892578	0.93812
PATH:00512	Mucin type O-Glycan biosynthesis	C1galt1	C1galt1	Glycoprotein-N-acetylgalactosamine 3-beta-galactosyltransferase 1	0.663368	0.892578	0.93812
PATH:04940	Type I diabetes mellitus	Il12b	Il12b	Interleukin-12 subunit beta	0.663418	0.892578	0.890419
PATH:04940	Type I diabetes mellitus	Gzmb	Gzmb	Granzyme B(G,H)	0.663418	0.892578	0.890419
PATH:05321	Inflammatory bowel disease (IBD)	Il12b	Il12b	Interleukin-12 subunit beta	0.663418	0.892578	0.890419
PATH:05321	Inflammatory bowel disease (IBD)	Tgfb3	Tgfb3	Transforming growth factor beta-3	0.663418	0.892578	0.890419
PATH:04512	ECM-receptor interaction	Itgav	Itgav	Integrin alpha-V	0.672199	0.892578	0.875579
PATH:04512	ECM-receptor interaction	Tnr	Tnr	Tenascin-R	0.672199	0.892578	0.875579
PATH:04512	ECM-receptor interaction	Lama3	Lama3	Putative uncharacterized protein	0.672199	0.892578	0.875579
PATH:00030	Pentose phosphate pathway	Pgm2	Pgm1	Phosphoglucomutase-2	0.676231	0.892578	0.905771
PATH:04621	NOD-like receptor signaling pathway	Card6	Card6	Protein Card6	0.681286	0.892578	0.861225
PATH:04621	NOD-like receptor signaling pathway	Map3k7	Map3k7	Mitogen-activated protein kinase kinase kinase 7	0.681286	0.892578	0.861225
PATH:04060	Cytokine-cytokine receptor interaction	Il12b	Il12b	Interleukin-12 subunit beta	0.681337	0.892578	0.895478
PATH:04060	Cytokine-cytokine receptor interaction	Tgfb3	Tgfb3	Transforming growth factor beta-3	0.681337	0.892578	0.895478
PATH:04060	Cytokine-cytokine receptor interaction	Il6st	Il6st	Interleukin-6 signal transductor	0.681337	0.892578	0.895478
PATH:04060	Cytokine-cytokine receptor interaction	Vegfb	Vegfb	Vascular endothelial growth factor B	0.681337	0.892578	0.895478
PATH:04060	Cytokine-cytokine receptor interaction	Il1r2	Il1r2	Interleukin-1 receptor type 2	0.681337	0.892578	0.895478
PATH:04060	Cytokine-cytokine receptor interaction	Tnfrsf21	Tnfrsf21	Putative uncharacterized protein	0.681337	0.892578	0.895478
PATH:04060	Cytokine-cytokine receptor interaction	Eda2r	Eda2r	Eda2r protein	0.681337	0.892578	0.895478
PATH:04060	Cytokine-cytokine receptor interaction	Tnfsf13b	Tnfsf13b	Tumor necrosis factor (Ligand) superfamily, member 13b, isoform CRA_a	0.681337	0.892578	0.895478
PATH:04060	Cytokine-cytokine receptor interaction	Tnfsf4	Tnfsf4	Tumor necrosis factor (Ligand) superfamily member 4	0.681337	0.892578	0.895478
PATH:04151	PI3K-Akt signaling pathway	Itgav	Itgav	Integrin alpha-V	0.688585	0.892578	0.900595
PATH:04151	PI3K-Akt signaling pathway	Tnr	Tnr	Tenascin-R	0.688585	0.892578	0.900595
PATH:04151	PI3K-Akt signaling pathway	Ccnd3	Ccnd3	G1/S-specific cyclin-D3	0.688585	0.892578	0.900595
PATH:04151	PI3K-Akt signaling pathway	Lama3	Lama3	Putative uncharacterized protein	0.688585	0.892578	0.900595
PATH:04151	PI3K-Akt signaling pathway	Vegfb	Vegfb	Vascular endothelial growth factor B	0.688585	0.892578	0.900595
PATH:04151	PI3K-Akt signaling pathway	Prkca	Prkca	Protein kinase C alpha type	0.688585	0.892578	0.900595
PATH:04151	PI3K-Akt signaling pathway	Akt2	Akt2	RAC-beta serine/threonine-protein kinase	0.688585	0.892578	0.900595
PATH:04151	PI3K-Akt signaling pathway	Igf1r	Igf1r	Tyrosine-protein kinase receptor	0.688585	0.892578	0.900595
PATH:04151	PI3K-Akt signaling pathway	Sgk1	Sgk1	Serine/threonine-protein kinase Sgk1	0.688585	0.892578	0.900595
PATH:04151	PI3K-Akt signaling pathway	Fgf9	Fgf9	Fibroblast growth factor 9	0.688585	0.892578	0.900595
PATH:04151	PI3K-Akt signaling pathway	Pik3cg	Pik3cg	Phosphoinositide-3-kinase gamma polypeptide	0.688585	0.892578	0.900595
PATH:04151	PI3K-Akt signaling pathway	Rptor	Rptor	Regulatory-associated protein of mTOR	0.688585	0.892578	0.900595
PATH:00450	Selenocompound metabolism	Ahcyl2	Ahcyl2	Ahcyl2 protein	0.688605	0.892578	0.875579
PATH:00630	Glyoxylate and dicarboxylate metabolism	Aco1	Aco1	Cytoplasmic aconitate hydratase	0.688605	0.892578	0.875579
PATH:00010	Glycolysis / Gluconeogenesis	Hk1	Hk1	Hexokinase 1	0.698373	0.892578	0.833884
PATH:00010	Glycolysis / Gluconeogenesis	Pgm2	Pgm1	Phosphoglucomutase-2	0.698373	0.892578	0.833884
PATH:04742	Taste transduction	Prkacb	Prkacb	cAMP-dependent protein kinase catalytic subunit beta transcript variant 5	0.698373	0.892578	0.833884
PATH:04742	Taste transduction	Pde1a	Pde1a	Calcium/calmodulin-dependent 3',5'-cyclic nucleotide phosphodiesterase 1A	0.698373	0.892578	0.833884
PATH:05169	Epstein-Barr virus infection	Rbpjl	Rbpjl	Recombining binding protein suppressor of hairless-like protein	0.69887	0.892578	0.871429
PATH:05169	Epstein-Barr virus infection	Prkacb	Prkacb	cAMP-dependent protein kinase catalytic subunit beta transcript variant 5	0.69887	0.892578	0.871429
PATH:05169	Epstein-Barr virus infection	Gtf2e2	Gtf2e2	General transcription factor IIE subunit 2	0.69887	0.892578	0.871429
PATH:05169	Epstein-Barr virus infection	Akt2	Akt2	RAC-beta serine/threonine-protein kinase	0.69887	0.892578	0.871429
PATH:05169	Epstein-Barr virus infection	Map3k7	Map3k7	Mitogen-activated protein kinase kinase kinase 7	0.69887	0.892578	0.871429
PATH:05169	Epstein-Barr virus infection	Eif2ak4	Eif2ak4	Eukaryotic translation initiation factor 2-alpha kinase 4	0.69887	0.892578	0.871429
PATH:05169	Epstein-Barr virus infection	Pik3cg	Pik3cg	Phosphoinositide-3-kinase gamma polypeptide	0.69887	0.892578	0.871429
PATH:03010	Ribosome	Rpl26	Rpl26	60S ribosomal protein L26	0.703885	0.894124	0.852836
PATH:03010	Ribosome	Gm15501	Gm15501	ribosomal protein S8 pseudogene	0.703885	0.894124	0.852836
PATH:03010	Ribosome	Mrpl35	Mrpl35	39S ribosomal protein L35, mitochondrial	0.703885	0.894124	0.852836
PATH:03010	Ribosome	Rpl41	Rpl41	60S ribosomal protein L41	0.703885	0.894124	0.852836
PATH:03010	Ribosome	Gm9843	Gm9843	predicted gene 9843	0.703885	0.894124	0.852836
PATH:00980	Metabolism of xenobiotics by cytochrome P450	Gstk1	Gstk1	Glutathione S-transferase kappa 1	0.714174	0.902316	0.820855
PATH:00980	Metabolism of xenobiotics by cytochrome P450	Cyp3a41a	Cyp3a41a	Cytochrome P450 3A41	0.714174	0.902316	0.820855
PATH:00980	Metabolism of xenobiotics by cytochrome P450	Sult2a3	Sult2a3	Sulfotransferase	0.714174	0.902316	0.820855
PATH:00982	Drug metabolism - cytochrome P450	Fmo9	Fmo9	Dimethylaniline monooxygenase [N-oxide-forming]	0.727212	0.913876	0.804103
PATH:00982	Drug metabolism - cytochrome P450	Gstk1	Gstk1	Glutathione S-transferase kappa 1	0.727212	0.913876	0.804103
PATH:00982	Drug metabolism - cytochrome P450	Cyp3a41a	Cyp3a41a	Cytochrome P450 3A41	0.727212	0.913876	0.804103
PATH:00040	Pentose and glucuronate interconversions	Cryl1	Cryl1	Crystallin, lamda 1, isoform CRA_a	0.733561	0.915085	0.772569
PATH:04115	p53 signaling pathway	Ddb2	Ddb2	DNA damage-binding protein 2	0.73779	0.915085	0.772569
PATH:04115	p53 signaling pathway	Ccnd3	Ccnd3	G1/S-specific cyclin-D3	0.73779	0.915085	0.772569
PATH:05020	Prion diseases	Prkacb	Prkacb	cAMP-dependent protein kinase catalytic subunit beta transcript variant 5	0.74375	0.915085	0.750496
PATH:04130	SNARE interactions in vesicular transport	Stx17	Stx17	Syntaxin-17	0.74375	0.915085	0.750496
PATH:03410	Base excision repair	Parp2	Parp2	Poly [ADP-ribose] polymerase 2	0.762978	0.933853	0.709929
PATH:03040	Spliceosome	Gm17748	Gm17748	predicted gene, 17748	0.776902	0.945968	0.761373
PATH:03040	Spliceosome	Hnrnpk	Hnrnpk	Heterogeneous nuclear ribonucleoprotein K	0.776902	0.945968	0.761373
PATH:03040	Spliceosome	Ctnnbl1	Ctnnbl1	Putative uncharacterized protein	0.776902	0.945968	0.761373
PATH:03040	Spliceosome	Rbm22	Rbm22	Pre-mRNA-splicing factor RBM22	0.776902	0.945968	0.761373
PATH:04140	Regulation of autophagy	Pik3c3	Pik3c3	Phosphatidylinositol 3-kinase catalytic subunit type 3	0.789157	0.948088	0.656684
PATH:00051	Fructose and mannose metabolism	Hk1	Hk1	Hexokinase 1	0.789157	0.948088	0.656684
PATH:01200	Carbon metabolism	Hk1	Hk1	Hexokinase 1	0.790746	0.948088	0.722955
PATH:01200	Carbon metabolism	Sdhd	Sdhd	Succinate dehydrogenase [ubiquinone] cytochrome b small subunit, mitochondrial	0.790746	0.948088	0.722955
PATH:01200	Carbon metabolism	Aco1	Aco1	Cytoplasmic aconitate hydratase	0.790746	0.948088	0.722955
PATH:05219	Bladder cancer	Vegfb	Vegfb	Vascular endothelial growth factor B	0.804988	0.951961	0.625413
PATH:04260	Cardiac muscle contraction	Cox7c	Cox7c	Cytochrome c oxidase subunit 7C, mitochondrial	0.809269	0.951961	0.664996
PATH:04260	Cardiac muscle contraction	Cacna1d	Cacna1d	Cacna1d protein	0.809269	0.951961	0.664996
PATH:00270	Cysteine and methionine metabolism	Ahcyl2	Ahcyl2	Ahcyl2 protein	0.812454	0.951961	0.610869
PATH:00860	Porphyrin and chlorophyll metabolism	Hmox2	Hmox2	Heme oxygenase 2	0.812454	0.951961	0.610869
PATH:00620	Pyruvate metabolism	Acot12	Acot12	Acyl-CoA thioesterase 12	0.819634	0.951961	0.596985
PATH:01100	Metabolic pathways	Alpl	Alpl	Alkaline phosphatase, tissue-nonspecific isozyme	0.823246	0.951961	0.88785
PATH:01100	Metabolic pathways	Pik3c3	Pik3c3	Phosphatidylinositol 3-kinase catalytic subunit type 3	0.823246	0.951961	0.88785
PATH:01100	Metabolic pathways	Cox7c	Cox7c	Cytochrome c oxidase subunit 7C, mitochondrial	0.823246	0.951961	0.88785
PATH:01100	Metabolic pathways	Cryl1	Cryl1	Crystallin, lamda 1, isoform CRA_a	0.823246	0.951961	0.88785
PATH:01100	Metabolic pathways	Pigyl	Pigyl	Phosphatidylinositol N-acetylglucosaminyltransferase subunit Y	0.823246	0.951961	0.88785
PATH:01100	Metabolic pathways	Nme6	Nme6	Nucleoside diphosphate kinase 6	0.823246	0.951961	0.88785
PATH:01100	Metabolic pathways	Coq7	Coq7	Ubiquinone biosynthesis protein COQ7 homolog	0.823246	0.951961	0.88785
PATH:01100	Metabolic pathways	Hk1	Hk1	Hexokinase 1	0.823246	0.951961	0.88785
PATH:01100	Metabolic pathways	Pik3c2g	Pik3c2g	Phosphatidylinositol 4-phosphate 3-kinase C2 domain-containing subunit gamma	0.823246	0.951961	0.88785
PATH:01100	Metabolic pathways	Ugcg	Ugcg	Ceramide glucosyltransferase	0.823246	0.951961	0.88785
PATH:01100	Metabolic pathways	Pmvk	Pmvk	Phosphomevalonate kinase	0.823246	0.951961	0.88785
PATH:01100	Metabolic pathways	Pi4ka	Pi4ka	Protein Pi4ka	0.823246	0.951961	0.88785
PATH:01100	Metabolic pathways	Lpcat1	Lpcat1	Lysophosphatidylcholine acyltransferase 1	0.823246	0.951961	0.88785
PATH:01100	Metabolic pathways	Mthfsl	Gm2382	5-formyltetrahydrofolate cyclo-ligase	0.823246	0.951961	0.88785
PATH:01100	Metabolic pathways	Agk	Agk	Acylglycerol kinase, mitochondrial	0.823246	0.951961	0.88785
PATH:01100	Metabolic pathways	Synj2	Synj2	Synaptojanin-2	0.823246	0.951961	0.88785
PATH:01100	Metabolic pathways	Cyp3a41a	Cyp3a41a	Cytochrome P450 3A41	0.823246	0.951961	0.88785
PATH:01100	Metabolic pathways	Mgat4a	Mgat4a	Alpha-1,3-mannosyl-glycoprotein 4-beta-N-acetylglucosaminyltransferase A	0.823246	0.951961	0.88785
PATH:01100	Metabolic pathways	Acox1	Acox1	Peroxisomal acyl-coenzyme A oxidase 1	0.823246	0.951961	0.88785
PATH:01100	Metabolic pathways	C1galt1	C1galt1	Glycoprotein-N-acetylgalactosamine 3-beta-galactosyltransferase 1	0.823246	0.951961	0.88785
PATH:01100	Metabolic pathways	Tyms	Tyms	Thymidylate synthase, isoform CRA_b	0.823246	0.951961	0.88785
PATH:01100	Metabolic pathways	Gcnt2	Gcnt2	Beta-1,6-N-acetylglucosaminyltransferase B	0.823246	0.951961	0.88785
PATH:01100	Metabolic pathways	Sdhd	Sdhd	Succinate dehydrogenase [ubiquinone] cytochrome b small subunit, mitochondrial	0.823246	0.951961	0.88785
PATH:01100	Metabolic pathways	Nat2	Nat2	Arylamine N-acetyltransferase 2	0.823246	0.951961	0.88785
PATH:01100	Metabolic pathways	Plcb4	Plcb4	Phosphoinositide phospholipase C	0.823246	0.951961	0.88785
PATH:01100	Metabolic pathways	Lpin1	Lpin1	Phosphatidate phosphatase LPIN1	0.823246	0.951961	0.88785
PATH:01100	Metabolic pathways	Tk2	Tk2	Thymidine kinase 2, mitochondrial, isoform CRA_b	0.823246	0.951961	0.88785
PATH:01100	Metabolic pathways	Ahcyl2	Ahcyl2	Ahcyl2 protein	0.823246	0.951961	0.88785
PATH:01100	Metabolic pathways	St6galnac5	St6galnac5	Alpha-N-acetylgalactosaminide alpha-2,6-sialyltransferase 5	0.823246	0.951961	0.88785
PATH:01100	Metabolic pathways	Pla2g10	Pla2g10	Phospholipase A(2)	0.823246	0.951961	0.88785
PATH:01100	Metabolic pathways	P4ha3	P4ha3	Prolyl 4-hydroxylase subunit alpha-3	0.823246	0.951961	0.88785
PATH:01100	Metabolic pathways	Dgkq	Dgkq	Diacylglycerol kinase theta	0.823246	0.951961	0.88785
PATH:01100	Metabolic pathways	Nme4	Nme4	Nucleoside diphosphate kinase	0.823246	0.951961	0.88785
PATH:01100	Metabolic pathways	Idi1	Idi1	Isopentenyl-diphosphate delta isomerase	0.823246	0.951961	0.88785
PATH:01100	Metabolic pathways	Tusc3	Tusc3	Putative uncharacterized protein	0.823246	0.951961	0.88785
PATH:01100	Metabolic pathways	Sis	Sis	Sucrase-isomaltase	0.823246	0.951961	0.88785
PATH:01100	Metabolic pathways	Dgkz	Dgkz	Diacylglycerol kinase zeta	0.823246	0.951961	0.88785
PATH:01100	Metabolic pathways	Pgm2	Pgm1	Phosphoglucomutase-2	0.823246	0.951961	0.88785
PATH:01100	Metabolic pathways	Gda	Gda	Guanine deaminase	0.823246	0.951961	0.88785
PATH:01100	Metabolic pathways	Ndufs4	Ndufs4	NADH dehydrogenase [ubiquinone] iron-sulfur protein 4, mitochondrial	0.823246	0.951961	0.88785
PATH:01100	Metabolic pathways	Aco1	Aco1	Cytoplasmic aconitate hydratase	0.823246	0.951961	0.88785
PATH:00600	Sphingolipid metabolism	Ugcg	Ugcg	Ceramide glucosyltransferase	0.826541	0.951961	0.583719
PATH:03050	Proteasome	Psma6	Psma6	Proteasome subunit alpha type-6	0.833184	0.951961	0.57103
PATH:04978	Mineral absorption	Hmox2	Hmox2	Heme oxygenase 2	0.839574	0.951961	0.55888
PATH:05012	Parkinson's disease	Prkacb	Prkacb	cAMP-dependent protein kinase catalytic subunit beta transcript variant 5	0.84052	0.951961	0.686728
PATH:05012	Parkinson's disease	Cox7c	Cox7c	Cytochrome c oxidase subunit 7C, mitochondrial	0.84052	0.951961	0.686728
PATH:05012	Parkinson's disease	Sdhd	Sdhd	Succinate dehydrogenase [ubiquinone] cytochrome b small subunit, mitochondrial	0.84052	0.951961	0.686728
PATH:05012	Parkinson's disease	Ndufs4	Ndufs4	NADH dehydrogenase [ubiquinone] iron-sulfur protein 4, mitochondrial	0.84052	0.951961	0.686728
PATH:04640	Hematopoietic cell lineage	Cd4	Cd4	T4 surface glycoprotein	0.845217	0.951961	0.610869
PATH:04640	Hematopoietic cell lineage	Il1r2	Il1r2	Interleukin-1 receptor type 2	0.845217	0.951961	0.610869
PATH:05030	Cocaine addiction	Prkacb	Prkacb	cAMP-dependent protein kinase catalytic subunit beta transcript variant 5	0.85163	0.951961	0.536069
PATH:05144	Malaria	Tgfb3	Tgfb3	Transforming growth factor beta-3	0.857316	0.951961	0.525347
PATH:01212	Fatty acid metabolism	Acox1	Acox1	Peroxisomal acyl-coenzyme A oxidase 1	0.857316	0.951961	0.525347
PATH:04974	Protein digestion and absorption	Mep1a	Mep1a	Meprin A subunit alpha	0.858655	0.951961	0.590278
PATH:04974	Protein digestion and absorption	Col9a1	Col9a1	Procollagen, type IX, alpha 1	0.858655	0.951961	0.590278
PATH:05016	Huntington's disease	Cox7c	Cox7c	Cytochrome c oxidase subunit 7C, mitochondrial	0.85879	0.951961	0.687627
PATH:05016	Huntington's disease	Rest	Rest	REST4	0.85879	0.951961	0.687627
PATH:05016	Huntington's disease	Sdhd	Sdhd	Succinate dehydrogenase [ubiquinone] cytochrome b small subunit, mitochondrial	0.85879	0.951961	0.687627
PATH:05016	Huntington's disease	Plcb4	Plcb4	Phosphoinositide phospholipase C	0.85879	0.951961	0.687627
PATH:05016	Huntington's disease	Ndufs4	Ndufs4	NADH dehydrogenase [ubiquinone] iron-sulfur protein 4, mitochondrial	0.85879	0.951961	0.687627
PATH:05332	Graft-versus-host disease	Gzmb	Gzmb	Granzyme B(G,H)	0.877967	0.96098	0.486433
PATH:05034	Alcoholism	Hist4h4	Hist4h4	histone cluster 4, H4	0.881498	0.96098	0.659984
PATH:05034	Alcoholism	Gm14920	Gm14920	Histone H2A	0.881498	0.96098	0.659984
PATH:05034	Alcoholism	H2bfm	H2bfm	Protein H2bfm	0.881498	0.96098	0.659984
PATH:05034	Alcoholism	Hist2h2ab	Hist2h2ab	Histone H2A type 2-B	0.881498	0.96098	0.659984
PATH:05034	Alcoholism	Hist1h2ab	Hist1h2ab	histone cluster 1, H2ab	0.881498	0.96098	0.659984
PATH:05168	Herpes simplex infection	Il12b	Il12b	Interleukin-12 subunit beta	0.884106	0.96098	0.656684
PATH:05168	Herpes simplex infection	Fos	Fos	Proto-oncogene c-Fos	0.884106	0.96098	0.656684
PATH:05168	Herpes simplex infection	Hnrnpk	Hnrnpk	Heterogeneous nuclear ribonucleoprotein K	0.884106	0.96098	0.656684
PATH:05168	Herpes simplex infection	Map3k7	Map3k7	Mitogen-activated protein kinase kinase kinase 7	0.884106	0.96098	0.656684
PATH:05168	Herpes simplex infection	Eif2ak4	Eif2ak4	Eukaryotic translation initiation factor 2-alpha kinase 4	0.884106	0.96098	0.656684
PATH:00480	Glutathione metabolism	Gstk1	Gstk1	Glutathione S-transferase kappa 1	0.887146	0.96098	0.46906
PATH:05134	Legionellosis	Il12b	Il12b	Interleukin-12 subunit beta	0.891475	0.96098	0.460831
PATH:05160	Hepatitis C	Akt2	Akt2	RAC-beta serine/threonine-protein kinase	0.89904	0.96098	0.575198
PATH:05160	Hepatitis C	Eif2ak4	Eif2ak4	Eukaryotic translation initiation factor 2-alpha kinase 4	0.89904	0.96098	0.575198
PATH:05160	Hepatitis C	Pik3cg	Pik3cg	Phosphoinositide-3-kinase gamma polypeptide	0.89904	0.96098	0.575198
PATH:04064	NF-kappa B signaling pathway	Tnfsf13b	Tnfsf13b	Tumor necrosis factor (Ligand) superfamily, member 13b, isoform CRA_a	0.8993	0.96098	0.525347
PATH:04064	NF-kappa B signaling pathway	Map3k7	Map3k7	Mitogen-activated protein kinase kinase kinase 7	0.8993	0.96098	0.525347
PATH:00330	Arginine and proline metabolism	P4ha3	P4ha3	Prolyl 4-hydroxylase subunit alpha-3	0.899641	0.96098	0.44521
PATH:04721	Synaptic vesicle cycle	Syt1	Syt1	Synaptotagmin-1	0.914183	0.966848	0.416942
PATH:04623	Cytosolic DNA-sensing pathway	Il33	Il33	Interleukin-33	0.914183	0.966848	0.416942
PATH:00970	Aminoacyl-tRNA biosynthesis	Dars	Dars	Putative uncharacterized protein	0.917477	0.966848	0.410428
PATH:05320	Autoimmune thyroid disease	Gzmb	Gzmb	Granzyme B(G,H)	0.926624	0.972127	0.39205
PATH:04920	Adipocytokine signaling pathway	Akt2	Akt2	RAC-beta serine/threonine-protein kinase	0.937266	0.978922	0.369963
PATH:04610	Complement and coagulation cascades	Mbl2	Mbl2	Mannose-binding protein C	0.948432	0.982706	0.345623
PATH:01230	Biosynthesis of amino acids	Aco1	Aco1	Cytoplasmic aconitate hydratase	0.950415	0.982706	0.341135
PATH:04612	Antigen processing and presentation	Cd4	Cd4	T4 surface glycoprotein	0.954156	0.982706	0.332498
PATH:03320	PPAR signaling pathway	Acox1	Acox1	Peroxisomal acyl-coenzyme A oxidase 1	0.957616	0.982706	0.324288
PATH:00140	Steroid hormone biosynthesis	Cyp3a41a	Cyp3a41a	Cytochrome P450 3A41	0.963774	0.982779	0.309028
PATH:05416	Viral myocarditis	Eif4g2	Eif4g2	Eukaryotic translation initiation factor 4, gamma 2, isoform CRA_e	0.96904	0.982779	0.295139
PATH:00830	Retinol metabolism	Cyp3a41a	Cyp3a41a	Cytochrome P450 3A41	0.970233	0.982779	0.29186
PATH:00590	Arachidonic acid metabolism	Pla2g10	Pla2g10	Phospholipase A(2)	0.978265	0.986662	0.268034
PATH:04142	Lysosome	Abcb9	Abcb9	ATP-binding cassette sub-family B member 9	0.991883	0.996122	0.213556
PATH:04740	Olfactory transduction	Prkacb	Prkacb	cAMP-dependent protein kinase catalytic subunit beta transcript variant 5	1	1	0.344329
PATH:04740	Olfactory transduction	Olfr1357	Olfr1357	Olfactory receptor 1357	1	1	0.344329
PATH:04740	Olfactory transduction	Olfr223	Olfr223	Olfactory receptor	1	1	0.344329
PATH:04740	Olfactory transduction	Olfr589	Olfr589	Olfactory receptor MOR32-3	1	1	0.344329
PATH:04740	Olfactory transduction	Olfr606	Olfr606	Olfactory receptor	1	1	0.344329
PATH:04740	Olfactory transduction	Olfr1124	Olfr1124	Olfactory receptor Olfr1124	1	1	0.344329
PATH:04740	Olfactory transduction	Olfr599	Olfr599	Olfactory receptor	1	1	0.344329
PATH:04740	Olfactory transduction	Olfr474	Olfr474	Olfactory receptor 474	1	1	0.344329
PATH:04740	Olfactory transduction	Prkg2	Prkg2	cGMP-dependent protein kinase	1	1	0.344329
PATH:04740	Olfactory transduction	Olfr307	Olfr307	Olfactory receptor	1	1	0.344329
PATH:04740	Olfactory transduction	Olfr50	Olfr50	Olfactory receptor 50	1	1	0.344329
PATH:04740	Olfactory transduction	Olfr1323	Olfr1323	Olfactory receptor	1	1	0.344329
PATH:04740	Olfactory transduction	Olfr736	Olfr736	Olfactory receptor	1	1	0.344329
PATH:04740	Olfactory transduction	Olfr601	Olfr601	Protein Olfr601	1	1	0.344329

## Sheet: DownGene2Pathway
QueryID	QuerySymbol	Description	PathwayID	PathwayTerm	P-Value	Enrichment
Ppp3ca	Ppp3ca	Serine/threonine-protein phosphatase 2B catalytic subunit alpha isoform	PATH:04728	Dopaminergic synapse	0.134135	1.57999
Ppp3ca	Ppp3ca	Serine/threonine-protein phosphatase 2B catalytic subunit alpha isoform	PATH:04921	Oxytocin signaling pathway	0.0787806	1.66249
Ppp3ca	Ppp3ca	Serine/threonine-protein phosphatase 2B catalytic subunit alpha isoform	PATH:04724	Glutamatergic synapse	0.0549008	1.84692
Ppp3ca	Ppp3ca	Serine/threonine-protein phosphatase 2B catalytic subunit alpha isoform	PATH:04114	Oocyte meiosis	0.0631886	1.87624
Ppp3ca	Ppp3ca	Serine/threonine-protein phosphatase 2B catalytic subunit alpha isoform	PATH:04720	Long-term potentiation	0.121607	1.90343
Ppp3ca	Ppp3ca	Serine/threonine-protein phosphatase 2B catalytic subunit alpha isoform	PATH:04660	T cell receptor signaling pathway	0.00947948	2.36643
Ppp3ca	Ppp3ca	Serine/threonine-protein phosphatase 2B catalytic subunit alpha isoform	PATH:04022	cGMP-PKG signaling pathway	0.113573	1.54514
Ppp3ca	Ppp3ca	Serine/threonine-protein phosphatase 2B catalytic subunit alpha isoform	PATH:05166	HTLV-I infection	0.180319	1.31337
Ppp3ca	Ppp3ca	Serine/threonine-protein phosphatase 2B catalytic subunit alpha isoform	PATH:04650	Natural killer cell mediated cytotoxicity	0.313386	1.30251
Ppp3ca	Ppp3ca	Serine/threonine-protein phosphatase 2B catalytic subunit alpha isoform	PATH:04210	Apoptosis	0.236347	1.50962
Ppp3ca	Ppp3ca	Serine/threonine-protein phosphatase 2B catalytic subunit alpha isoform	PATH:04662	B cell receptor signaling pathway	0.0722752	2.04681
Ppp3ca	Ppp3ca	Serine/threonine-protein phosphatase 2B catalytic subunit alpha isoform	PATH:04310	Wnt signaling pathway	0.017184	1.99499
Ppp3ca	Ppp3ca	Serine/threonine-protein phosphatase 2B catalytic subunit alpha isoform	PATH:05014	Amyotrophic lateral sclerosis (ALS)	0.635124	0.93812
Ppp3ca	Ppp3ca	Serine/threonine-protein phosphatase 2B catalytic subunit alpha isoform	PATH:05152	Tuberculosis	0.36687	1.18056
Ppp3ca	Ppp3ca	Serine/threonine-protein phosphatase 2B catalytic subunit alpha isoform	PATH:05031	Amphetamine addiction	0.0154666	2.6648
Ppp3ca	Ppp3ca	Serine/threonine-protein phosphatase 2B catalytic subunit alpha isoform	PATH:04370	VEGF signaling pathway	0.0284294	2.35733
Ppp3ca	Ppp3ca	Serine/threonine-protein phosphatase 2B catalytic subunit alpha isoform	PATH:04360	Axon guidance	0.0129914	2.15628
Ppp3ca	Ppp3ca	Serine/threonine-protein phosphatase 2B catalytic subunit alpha isoform	PATH:04020	Calcium signaling pathway	0.171365	1.41222
Ppp3ca	Ppp3ca	Serine/threonine-protein phosphatase 2B catalytic subunit alpha isoform	PATH:05010	Alzheimer's disease	0.372701	1.17396
Ppp3ca	Ppp3ca	Serine/threonine-protein phosphatase 2B catalytic subunit alpha isoform	PATH:04010	MAPK signaling pathway	0.00339727	1.93855
Ppp3ca	Ppp3ca	Serine/threonine-protein phosphatase 2B catalytic subunit alpha isoform	PATH:04380	Osteoclast differentiation	0.0527148	1.86147
Rad21	Rad21	RAD21 homolog (S. pombe)	PATH:04110	Cell cycle	0.107128	1.66777
P2ry14	P2ry14	Purinergic receptor P2Y, G-protein coupled, 14, isoform CRA_a	PATH:04080	Neuroactive ligand-receptor interaction	0.187052	1.30405
Sec11c	Sec11c	Signal peptidase complex catalytic subunit SEC11C	PATH:03060	Protein export	0.649996	0.972865
Fip1l1	Fip1l1	Pre-mRNA 3'-end-processing factor FIP1	PATH:03015	mRNA surveillance pathway	0.491643	1.10599
Mob1b	Mob1b	MOB1, Mps One Binder kinase activator-like 1A (Yeast), isoform CRA_c	PATH:04390	Hippo signaling pathway	0.0142745	2.04681
Nrg1	Nrg1	Type III neuregulin 1	PATH:04012	ErbB signaling pathway	0.113382	1.81154
Tcf7l2	Tcf7l2	Transcription factor 7-like 2	PATH:05200	Pathways in cancer	0.0256076	1.5968
Tcf7l2	Tcf7l2	Transcription factor 7-like 2	PATH:05221	Acute myeloid leukemia	0.170945	1.84332
Tcf7l2	Tcf7l2	Transcription factor 7-like 2	PATH:05210	Colorectal cancer	0.0389141	2.38794
Tcf7l2	Tcf7l2	Transcription factor 7-like 2	PATH:05213	Endometrial cancer	0.317615	1.51542
Tcf7l2	Tcf7l2	Transcription factor 7-like 2	PATH:04310	Wnt signaling pathway	0.017184	1.99499
Tcf7l2	Tcf7l2	Transcription factor 7-like 2	PATH:04520	Adherens junction	0.00138713	3.32967
Tcf7l2	Tcf7l2	Transcription factor 7-like 2	PATH:04916	Melanogenesis	0.180779	1.57604
Tcf7l2	Tcf7l2	Transcription factor 7-like 2	PATH:04390	Hippo signaling pathway	0.0142745	2.04681
Tcf7l2	Tcf7l2	Transcription factor 7-like 2	PATH:05215	Prostate cancer	0.441171	1.18056
Tcf7l2	Tcf7l2	Transcription factor 7-like 2	PATH:05412	Arrhythmogenic right ventricular cardiomyopathy (ARVC)	0.310812	1.41986
Tcf7l2	Tcf7l2	Transcription factor 7-like 2	PATH:05217	Basal cell carcinoma	0.349228	1.43277
Tcf7l2	Tcf7l2	Transcription factor 7-like 2	PATH:05216	Thyroid cancer	0.317405	1.75116
Parp2	Parp2	Poly [ADP-ribose] polymerase 2	PATH:03410	Base excision repair	0.762978	0.709929
Hist4h4	Hist4h4	histone cluster 4, H4	PATH:05034	Alcoholism	0.881498	0.659984
Hist4h4	Hist4h4	histone cluster 4, H4	PATH:05322	Systemic lupus erythematosus	0.333381	1.24238
Hist4h4	Hist4h4	histone cluster 4, H4	PATH:05203	Viral carcinogenesis	0.0132559	1.84332
Cd4	Cd4	T4 surface glycoprotein	PATH:04660	T cell receptor signaling pathway	0.00947948	2.36643
Cd4	Cd4	T4 surface glycoprotein	PATH:04640	Hematopoietic cell lineage	0.845217	0.610869
Cd4	Cd4	T4 surface glycoprotein	PATH:05340	Primary immunodeficiency	0.387129	1.50099
Cd4	Cd4	T4 surface glycoprotein	PATH:04514	Cell adhesion molecules (CAMs)	0.529771	1.03009
Cd4	Cd4	T4 surface glycoprotein	PATH:04612	Antigen processing and presentation	0.954156	0.332498
Ddb2	Ddb2	DNA damage-binding protein 2	PATH:03420	Nucleotide excision repair	0.234218	1.79096
Ddb2	Ddb2	DNA damage-binding protein 2	PATH:04120	Ubiquitin mediated proteolysis	0.164273	1.50099
Ddb2	Ddb2	DNA damage-binding protein 2	PATH:05161	Hepatitis B	0.187557	1.44923
Ddb2	Ddb2	DNA damage-binding protein 2	PATH:04115	p53 signaling pathway	0.73779	0.772569
Nol6	Nol6	Putative uncharacterized protein	PATH:03008	Ribosome biogenesis in eukaryotes	0.201683	1.60167
Cyb5r3	Cyb5r3	NADH-cytochrome b5 reductase 3	PATH:00520	Amino sugar and nucleotide sugar metabolism	0.108746	2.18895
Rbpjl	Rbpjl	Recombining binding protein suppressor of hairless-like protein	PATH:04330	Notch signaling pathway	0.286055	1.60821
Rbpjl	Rbpjl	Recombining binding protein suppressor of hairless-like protein	PATH:05169	Epstein-Barr virus infection	0.69887	0.871429
Rbpjl	Rbpjl	Recombining binding protein suppressor of hairless-like protein	PATH:05203	Viral carcinogenesis	0.0132559	1.84332
Gm14920	Gm14920	Histone H2A	PATH:05034	Alcoholism	0.881498	0.659984
Gm14920	Gm14920	Histone H2A	PATH:05322	Systemic lupus erythematosus	0.333381	1.24238
Sema3e	Sema3e	Semaphorin-3E	PATH:04360	Axon guidance	0.0129914	2.15628
Mnx1	Mnx1	Homeobox gene HB9	PATH:04950	Maturity onset diabetes of the young	0.636094	1.01028
Mecom	Mecom	Evi1 protein	PATH:05200	Pathways in cancer	0.0256076	1.5968
Mecom	Mecom	Evi1 protein	PATH:05220	Chronic myeloid leukemia	0.144435	1.79913
Mecom	Mecom	Evi1 protein	PATH:04010	MAPK signaling pathway	0.00339727	1.93855
Alpl	Alpl	Alkaline phosphatase, tissue-nonspecific isozyme	PATH:00790	Folate biosynthesis	0.396486	2.02057
Alpl	Alpl	Alkaline phosphatase, tissue-nonspecific isozyme	PATH:01100	Metabolic pathways	0.823246	0.88785
Pik3c3	Pik3c3	Phosphatidylinositol 3-kinase catalytic subunit type 3	PATH:04145	Phagosome	0.489779	1.06284
Pik3c3	Pik3c3	Phosphatidylinositol 3-kinase catalytic subunit type 3	PATH:05152	Tuberculosis	0.36687	1.18056
Pik3c3	Pik3c3	Phosphatidylinositol 3-kinase catalytic subunit type 3	PATH:04140	Regulation of autophagy	0.789157	0.656684
Pik3c3	Pik3c3	Phosphatidylinositol 3-kinase catalytic subunit type 3	PATH:04070	Phosphatidylinositol signaling system	0.00348967	2.9186
Pik3c3	Pik3c3	Phosphatidylinositol 3-kinase catalytic subunit type 3	PATH:00562	Inositol phosphate metabolism	0.0277891	2.58367
Pik3c3	Pik3c3	Phosphatidylinositol 3-kinase catalytic subunit type 3	PATH:01100	Metabolic pathways	0.823246	0.88785
Prkacb	Prkacb	cAMP-dependent protein kinase catalytic subunit beta transcript variant 5	PATH:04727	GABAergic synapse	0.250658	1.47569
Prkacb	Prkacb	cAMP-dependent protein kinase catalytic subunit beta transcript variant 5	PATH:04728	Dopaminergic synapse	0.134135	1.57999
Prkacb	Prkacb	cAMP-dependent protein kinase catalytic subunit beta transcript variant 5	PATH:04921	Oxytocin signaling pathway	0.0787806	1.66249
Prkacb	Prkacb	cAMP-dependent protein kinase catalytic subunit beta transcript variant 5	PATH:04723	Retrograde endocannabinoid signaling	0.0971352	1.78516
Prkacb	Prkacb	cAMP-dependent protein kinase catalytic subunit beta transcript variant 5	PATH:04724	Glutamatergic synapse	0.0549008	1.84692
Prkacb	Prkacb	cAMP-dependent protein kinase catalytic subunit beta transcript variant 5	PATH:04725	Cholinergic synapse	0.0279559	2.09209
Prkacb	Prkacb	cAMP-dependent protein kinase catalytic subunit beta transcript variant 5	PATH:04726	Serotonergic synapse	0.187557	1.44923
Prkacb	Prkacb	cAMP-dependent protein kinase catalytic subunit beta transcript variant 5	PATH:04961	Endocrine and other factor-regulated calcium reabsorption	0.349228	1.43277
Prkacb	Prkacb	cAMP-dependent protein kinase catalytic subunit beta transcript variant 5	PATH:04962	Vasopressin-regulated water reabsorption	0.234218	1.79096
Prkacb	Prkacb	cAMP-dependent protein kinase catalytic subunit beta transcript variant 5	PATH:04720	Long-term potentiation	0.121607	1.90343
Prkacb	Prkacb	cAMP-dependent protein kinase catalytic subunit beta transcript variant 5	PATH:05414	Dilated cardiomyopathy	0.250658	1.47569
Prkacb	Prkacb	cAMP-dependent protein kinase catalytic subunit beta transcript variant 5	PATH:05012	Parkinson's disease	0.84052	0.686728
Prkacb	Prkacb	cAMP-dependent protein kinase catalytic subunit beta transcript variant 5	PATH:04918	Thyroid hormone synthesis	0.284892	1.47985
Prkacb	Prkacb	cAMP-dependent protein kinase catalytic subunit beta transcript variant 5	PATH:04919	Thyroid hormone signaling pathway	0.293277	1.33563
Prkacb	Prkacb	cAMP-dependent protein kinase catalytic subunit beta transcript variant 5	PATH:04914	Progesterone-mediated oocyte maturation	0.108824	1.83261
Prkacb	Prkacb	cAMP-dependent protein kinase catalytic subunit beta transcript variant 5	PATH:04915	Estrogen signaling pathway	0.0327268	2.14427
Prkacb	Prkacb	cAMP-dependent protein kinase catalytic subunit beta transcript variant 5	PATH:04916	Melanogenesis	0.180779	1.57604
Prkacb	Prkacb	cAMP-dependent protein kinase catalytic subunit beta transcript variant 5	PATH:04910	Insulin signaling pathway	0.46362	1.10213
Prkacb	Prkacb	cAMP-dependent protein kinase catalytic subunit beta transcript variant 5	PATH:04911	Insulin secretion	0.236347	1.50962
Prkacb	Prkacb	cAMP-dependent protein kinase catalytic subunit beta transcript variant 5	PATH:04713	Circadian entrainment	0.0792663	1.87624
Prkacb	Prkacb	cAMP-dependent protein kinase catalytic subunit beta transcript variant 5	PATH:04912	GnRH signaling pathway	0.0897393	1.82051
Prkacb	Prkacb	cAMP-dependent protein kinase catalytic subunit beta transcript variant 5	PATH:04913	Ovarian steroidogenesis	0.654187	0.905771
Prkacb	Prkacb	cAMP-dependent protein kinase catalytic subunit beta transcript variant 5	PATH:04114	Oocyte meiosis	0.0631886	1.87624
Prkacb	Prkacb	cAMP-dependent protein kinase catalytic subunit beta transcript variant 5	PATH:05203	Viral carcinogenesis	0.0132559	1.84332
Prkacb	Prkacb	cAMP-dependent protein kinase catalytic subunit beta transcript variant 5	PATH:05205	Proteoglycans in cancer	0.0254151	1.74341
Prkacb	Prkacb	cAMP-dependent protein kinase catalytic subunit beta transcript variant 5	PATH:05166	HTLV-I infection	0.180319	1.31337
Prkacb	Prkacb	cAMP-dependent protein kinase catalytic subunit beta transcript variant 5	PATH:05169	Epstein-Barr virus infection	0.69887	0.871429
Prkacb	Prkacb	cAMP-dependent protein kinase catalytic subunit beta transcript variant 5	PATH:04750	Inflammatory mediator regulation of TRP channels	0.347355	1.25083
Prkacb	Prkacb	cAMP-dependent protein kinase catalytic subunit beta transcript variant 5	PATH:04310	Wnt signaling pathway	0.017184	1.99499
Prkacb	Prkacb	cAMP-dependent protein kinase catalytic subunit beta transcript variant 5	PATH:04270	Vascular smooth muscle contraction	0.0571451	1.83261
Prkacb	Prkacb	cAMP-dependent protein kinase catalytic subunit beta transcript variant 5	PATH:04742	Taste transduction	0.698373	0.833884
Prkacb	Prkacb	cAMP-dependent protein kinase catalytic subunit beta transcript variant 5	PATH:04540	Gap junction	0.243474	1.49246
Prkacb	Prkacb	cAMP-dependent protein kinase catalytic subunit beta transcript variant 5	PATH:04740	Olfactory transduction	1	0.344329
Prkacb	Prkacb	cAMP-dependent protein kinase catalytic subunit beta transcript variant 5	PATH:05031	Amphetamine addiction	0.0154666	2.6648
Prkacb	Prkacb	cAMP-dependent protein kinase catalytic subunit beta transcript variant 5	PATH:04062	Chemokine signaling pathway	0.494867	1.05069
Prkacb	Prkacb	cAMP-dependent protein kinase catalytic subunit beta transcript variant 5	PATH:05030	Cocaine addiction	0.85163	0.536069
Prkacb	Prkacb	cAMP-dependent protein kinase catalytic subunit beta transcript variant 5	PATH:04261	Adrenergic signaling in cardiomyocytes	0.217226	1.39165
Prkacb	Prkacb	cAMP-dependent protein kinase catalytic subunit beta transcript variant 5	PATH:04020	Calcium signaling pathway	0.171365	1.41222
Prkacb	Prkacb	cAMP-dependent protein kinase catalytic subunit beta transcript variant 5	PATH:05032	Morphine addiction	0.00249349	2.85515
Prkacb	Prkacb	cAMP-dependent protein kinase catalytic subunit beta transcript variant 5	PATH:04340	Hedgehog signaling pathway	0.338698	1.4593
Prkacb	Prkacb	cAMP-dependent protein kinase catalytic subunit beta transcript variant 5	PATH:04976	Bile secretion	0.2935	1.4593
Prkacb	Prkacb	cAMP-dependent protein kinase catalytic subunit beta transcript variant 5	PATH:04611	Platelet activation	0.381639	1.20309
Prkacb	Prkacb	cAMP-dependent protein kinase catalytic subunit beta transcript variant 5	PATH:04210	Apoptosis	0.236347	1.50962
Prkacb	Prkacb	cAMP-dependent protein kinase catalytic subunit beta transcript variant 5	PATH:04970	Salivary secretion	0.336945	1.36454
Prkacb	Prkacb	cAMP-dependent protein kinase catalytic subunit beta transcript variant 5	PATH:05146	Amoebiasis	0.037271	1.98661
Prkacb	Prkacb	cAMP-dependent protein kinase catalytic subunit beta transcript variant 5	PATH:04971	Gastric acid secretion	0.539325	1.06489
Prkacb	Prkacb	cAMP-dependent protein kinase catalytic subunit beta transcript variant 5	PATH:04014	Ras signaling pathway	0.0524839	1.61291
Prkacb	Prkacb	cAMP-dependent protein kinase catalytic subunit beta transcript variant 5	PATH:05020	Prion diseases	0.74375	0.750496
Prkacb	Prkacb	cAMP-dependent protein kinase catalytic subunit beta transcript variant 5	PATH:04010	MAPK signaling pathway	0.00339727	1.93855
Cox7c	Cox7c	Cytochrome c oxidase subunit 7C, mitochondrial	PATH:05012	Parkinson's disease	0.84052	0.686728
Cox7c	Cox7c	Cytochrome c oxidase subunit 7C, mitochondrial	PATH:00190	Oxidative phosphorylation	0.627876	0.931467
Cox7c	Cox7c	Cytochrome c oxidase subunit 7C, mitochondrial	PATH:04260	Cardiac muscle contraction	0.809269	0.664996
Cox7c	Cox7c	Cytochrome c oxidase subunit 7C, mitochondrial	PATH:05010	Alzheimer's disease	0.372701	1.17396
Cox7c	Cox7c	Cytochrome c oxidase subunit 7C, mitochondrial	PATH:04932	Non-alcoholic fatty liver disease (NAFLD)	0.370916	1.19397
Cox7c	Cox7c	Cytochrome c oxidase subunit 7C, mitochondrial	PATH:01100	Metabolic pathways	0.823246	0.88785
Cox7c	Cox7c	Cytochrome c oxidase subunit 7C, mitochondrial	PATH:05016	Huntington's disease	0.85879	0.687627
Kcnj3	Kcnj3	G protein-activated inward rectifier potassium channel 1	PATH:04915	Estrogen signaling pathway	0.0327268	2.14427
Kcnj3	Kcnj3	G protein-activated inward rectifier potassium channel 1	PATH:04728	Dopaminergic synapse	0.134135	1.57999
Kcnj3	Kcnj3	G protein-activated inward rectifier potassium channel 1	PATH:05032	Morphine addiction	0.00249349	2.85515
Kcnj3	Kcnj3	G protein-activated inward rectifier potassium channel 1	PATH:04921	Oxytocin signaling pathway	0.0787806	1.66249
Kcnj3	Kcnj3	G protein-activated inward rectifier potassium channel 1	PATH:04723	Retrograde endocannabinoid signaling	0.0971352	1.78516
Kcnj3	Kcnj3	G protein-activated inward rectifier potassium channel 1	PATH:04724	Glutamatergic synapse	0.0549008	1.84692
Kcnj3	Kcnj3	G protein-activated inward rectifier potassium channel 1	PATH:04713	Circadian entrainment	0.0792663	1.87624
Kcnj3	Kcnj3	G protein-activated inward rectifier potassium channel 1	PATH:04725	Cholinergic synapse	0.0279559	2.09209
Kcnj3	Kcnj3	G protein-activated inward rectifier potassium channel 1	PATH:04726	Serotonergic synapse	0.187557	1.44923
Olfr1357	Olfr1357	Olfactory receptor 1357	PATH:04740	Olfactory transduction	1	0.344329
Npffr2	Npffr2	Neuropeptide FF receptor 2	PATH:04080	Neuroactive ligand-receptor interaction	0.187052	1.30405
Gm5415	Gm5415	Protein Gm5415	PATH:04310	Wnt signaling pathway	0.017184	1.99499
Gm5415	Gm5415	Protein Gm5415	PATH:03013	RNA transport	0.47128	1.0816
Nup107	Nup107	Nuclear pore complex protein Nup107	PATH:03013	RNA transport	0.47128	1.0816
Gtf2e2	Gtf2e2	General transcription factor IIE subunit 2	PATH:03022	Basal transcription factors	0.254782	1.71309
Gtf2e2	Gtf2e2	General transcription factor IIE subunit 2	PATH:05169	Epstein-Barr virus infection	0.69887	0.871429
Gtf2e2	Gtf2e2	General transcription factor IIE subunit 2	PATH:05203	Viral carcinogenesis	0.0132559	1.84332
Gtf2a1l	Gtf2a1l	TFIIA-alpha and beta-like factor	PATH:03022	Basal transcription factors	0.254782	1.71309
Gtf2a1l	Gtf2a1l	TFIIA-alpha and beta-like factor	PATH:05203	Viral carcinogenesis	0.0132559	1.84332
Cryl1	Cryl1	Crystallin, lamda 1, isoform CRA_a	PATH:00040	Pentose and glucuronate interconversions	0.733561	0.772569
Cryl1	Cryl1	Crystallin, lamda 1, isoform CRA_a	PATH:01100	Metabolic pathways	0.823246	0.88785
Rasal1	Rasal1	RasGAP-activating-like protein 1	PATH:04014	Ras signaling pathway	0.0524839	1.61291
Fcgr3	Fcgr3	Low affinity immunoglobulin gamma Fc region receptor III	PATH:04650	Natural killer cell mediated cytotoxicity	0.313386	1.30251
Fcgr3	Fcgr3	Low affinity immunoglobulin gamma Fc region receptor III	PATH:04145	Phagosome	0.489779	1.06284
Fcgr3	Fcgr3	Low affinity immunoglobulin gamma Fc region receptor III	PATH:05322	Systemic lupus erythematosus	0.333381	1.24238
Fcgr3	Fcgr3	Low affinity immunoglobulin gamma Fc region receptor III	PATH:05152	Tuberculosis	0.36687	1.18056
Fcgr3	Fcgr3	Low affinity immunoglobulin gamma Fc region receptor III	PATH:05140	Leishmaniasis	0.100639	2.02057
Fcgr3	Fcgr3	Low affinity immunoglobulin gamma Fc region receptor III	PATH:05150	Staphylococcus aureus infection	0.583908	1.03009
Fcgr3	Fcgr3	Low affinity immunoglobulin gamma Fc region receptor III	PATH:04380	Osteoclast differentiation	0.0527148	1.86147
Cacna1d	Cacna1d	Cacna1d protein	PATH:04727	GABAergic synapse	0.250658	1.47569
Cacna1d	Cacna1d	Cacna1d protein	PATH:04728	Dopaminergic synapse	0.134135	1.57999
Cacna1d	Cacna1d	Cacna1d protein	PATH:04921	Oxytocin signaling pathway	0.0787806	1.66249
Cacna1d	Cacna1d	Cacna1d protein	PATH:04723	Retrograde endocannabinoid signaling	0.0971352	1.78516
Cacna1d	Cacna1d	Cacna1d protein	PATH:04911	Insulin secretion	0.236347	1.50962
Cacna1d	Cacna1d	Cacna1d protein	PATH:04724	Glutamatergic synapse	0.0549008	1.84692
Cacna1d	Cacna1d	Cacna1d protein	PATH:04713	Circadian entrainment	0.0792663	1.87624
Cacna1d	Cacna1d	Cacna1d protein	PATH:04912	GnRH signaling pathway	0.0897393	1.82051
Cacna1d	Cacna1d	Cacna1d protein	PATH:04725	Cholinergic synapse	0.0279559	2.09209
Cacna1d	Cacna1d	Cacna1d protein	PATH:04726	Serotonergic synapse	0.187557	1.44923
Cacna1d	Cacna1d	Cacna1d protein	PATH:05412	Arrhythmogenic right ventricular cardiomyopathy (ARVC)	0.310812	1.41986
Cacna1d	Cacna1d	Cacna1d protein	PATH:04973	Carbohydrate digestion and absorption	0.0271962	2.9186
Cacna1d	Cacna1d	Cacna1d protein	PATH:04930	Type II diabetes mellitus	0.121555	2.10139
Cacna1d	Cacna1d	Cacna1d protein	PATH:05414	Dilated cardiomyopathy	0.250658	1.47569
Cacna1d	Cacna1d	Cacna1d protein	PATH:04022	cGMP-PKG signaling pathway	0.113573	1.54514
Cacna1d	Cacna1d	Cacna1d protein	PATH:05410	Hypertrophic cardiomyopathy (HCM)	0.215341	1.56353
Cacna1d	Cacna1d	Cacna1d protein	PATH:05031	Amphetamine addiction	0.0154666	2.6648
Cacna1d	Cacna1d	Cacna1d protein	PATH:04260	Cardiac muscle contraction	0.809269	0.664996
Cacna1d	Cacna1d	Cacna1d protein	PATH:04261	Adrenergic signaling in cardiomyocytes	0.217226	1.39165
Cacna1d	Cacna1d	Cacna1d protein	PATH:04020	Calcium signaling pathway	0.171365	1.41222
Cacna1d	Cacna1d	Cacna1d protein	PATH:05010	Alzheimer's disease	0.372701	1.17396
Cacna1d	Cacna1d	Cacna1d protein	PATH:04010	MAPK signaling pathway	0.00339727	1.93855
Cacna1d	Cacna1d	Cacna1d protein	PATH:04270	Vascular smooth muscle contraction	0.0571451	1.83261
Olfr223	Olfr223	Olfactory receptor	PATH:04740	Olfactory transduction	1	0.344329
Dbf4	Dbf4	DBF4 homolog (S. cerevisiae)	PATH:04110	Cell cycle	0.107128	1.66777
Il12b	Il12b	Interleukin-12 subunit beta	PATH:04620	Toll-like receptor signaling pathway	0.340049	1.30036
Il12b	Il12b	Interleukin-12 subunit beta	PATH:04940	Type I diabetes mellitus	0.663418	0.890419
Il12b	Il12b	Interleukin-12 subunit beta	PATH:04622	RIG-I-like receptor signaling pathway	0.259324	1.54514
Il12b	Il12b	Interleukin-12 subunit beta	PATH:05205	Proteoglycans in cancer	0.0254151	1.74341
Il12b	Il12b	Interleukin-12 subunit beta	PATH:05321	Inflammatory bowel disease (IBD)	0.663418	0.890419
Il12b	Il12b	Interleukin-12 subunit beta	PATH:05145	Toxoplasmosis	0.231668	1.4036
Il12b	Il12b	Interleukin-12 subunit beta	PATH:05134	Legionellosis	0.891475	0.460831
Il12b	Il12b	Interleukin-12 subunit beta	PATH:05133	Pertussis	0.539325	1.06489
Il12b	Il12b	Interleukin-12 subunit beta	PATH:05168	Herpes simplex infection	0.884106	0.656684
Il12b	Il12b	Interleukin-12 subunit beta	PATH:05146	Amoebiasis	0.037271	1.98661
Il12b	Il12b	Interleukin-12 subunit beta	PATH:04630	Jak-STAT signaling pathway	0.383501	1.17866
Il12b	Il12b	Interleukin-12 subunit beta	PATH:05152	Tuberculosis	0.36687	1.18056
Il12b	Il12b	Interleukin-12 subunit beta	PATH:05162	Measles	0.422815	1.1504
Il12b	Il12b	Interleukin-12 subunit beta	PATH:05140	Leishmaniasis	0.100639	2.02057
Il12b	Il12b	Interleukin-12 subunit beta	PATH:05330	Allograft rejection	0.59456	1.01028
Il12b	Il12b	Interleukin-12 subunit beta	PATH:05143	African trypanosomiasis	0.137997	2.31771
Il12b	Il12b	Interleukin-12 subunit beta	PATH:05164	Influenza A	0.47128	1.0816
Il12b	Il12b	Interleukin-12 subunit beta	PATH:05142	Chagas disease (American trypanosomiasis)	0.0971352	1.78516
Il12b	Il12b	Interleukin-12 subunit beta	PATH:04060	Cytokine-cytokine receptor interaction	0.681337	0.895478
Chst11	Chst11	Uncharacterized protein	PATH:00920	Sulfur metabolism	0.48343	1.54514
Chst11	Chst11	Uncharacterized protein	PATH:00532	Glycosaminoglycan biosynthesis - chondroitin sulfate / dermatan sulfate	0.574764	1.19397
Prkdc	Prkdc	DNA-dependent protein kinase catalytic subunit	PATH:04110	Cell cycle	0.107128	1.66777
Prkdc	Prkdc	DNA-dependent protein kinase catalytic subunit	PATH:03450	Non-homologous end-joining	0.396486	2.02057
Ssh1	Ssh1	Protein phosphatase Slingshot homolog 1	PATH:04810	Regulation of actin cytoskeleton	0.216904	1.31337
Wwc1	Wwc1	Protein KIBRA	PATH:04390	Hippo signaling pathway	0.0142745	2.04681
Ube2a	Ube2a	Putative uncharacterized protein	PATH:04120	Ubiquitin mediated proteolysis	0.164273	1.50099
Wasf2	Wasf2	Wiskott-Aldrich syndrome protein family member 2	PATH:05100	Bacterial invasion of epithelial cells	0.0302185	2.32749
Wasf2	Wasf2	Wiskott-Aldrich syndrome protein family member 2	PATH:04520	Adherens junction	0.00138713	3.32967
Wasf2	Wasf2	Wiskott-Aldrich syndrome protein family member 2	PATH:05132	Salmonella infection	0.0796861	1.99499
Wasf2	Wasf2	Wiskott-Aldrich syndrome protein family member 2	PATH:04666	Fc gamma R-mediated phagocytosis	0.0497844	2.08945
Wasf2	Wasf2	Wiskott-Aldrich syndrome protein family member 2	PATH:04810	Regulation of actin cytoskeleton	0.216904	1.31337
B3glct	B3glct	Beta-1,3-glucosyltransferase	PATH:00514	Other types of O-glycan biosynthesis	0.561992	1.07214
Itgav	Itgav	Integrin alpha-V	PATH:04919	Thyroid hormone signaling pathway	0.293277	1.33563
Itgav	Itgav	Integrin alpha-V	PATH:04514	Cell adhesion molecules (CAMs)	0.529771	1.03009
Itgav	Itgav	Integrin alpha-V	PATH:04510	Focal adhesion	0.053775	1.64171
Itgav	Itgav	Integrin alpha-V	PATH:05412	Arrhythmogenic right ventricular cardiomyopathy (ARVC)	0.310812	1.41986
Itgav	Itgav	Integrin alpha-V	PATH:04512	ECM-receptor interaction	0.672199	0.875579
Itgav	Itgav	Integrin alpha-V	PATH:05414	Dilated cardiomyopathy	0.250658	1.47569
Itgav	Itgav	Integrin alpha-V	PATH:05205	Proteoglycans in cancer	0.0254151	1.74341
Itgav	Itgav	Integrin alpha-V	PATH:04810	Regulation of actin cytoskeleton	0.216904	1.31337
Itgav	Itgav	Integrin alpha-V	PATH:05222	Small cell lung cancer	0.250658	1.47569
Itgav	Itgav	Integrin alpha-V	PATH:05200	Pathways in cancer	0.0256076	1.5968
Itgav	Itgav	Integrin alpha-V	PATH:04145	Phagosome	0.489779	1.06284
Itgav	Itgav	Integrin alpha-V	PATH:05410	Hypertrophic cardiomyopathy (HCM)	0.215341	1.56353
Itgav	Itgav	Integrin alpha-V	PATH:04151	PI3K-Akt signaling pathway	0.688585	0.900595
Pigyl	Pigyl	Phosphatidylinositol N-acetylglucosaminyltransferase subunit Y	PATH:00563	Glycosylphosphatidylinositol(GPI)-anchor biosynthesis	0.621642	1.05069
Pigyl	Pigyl	Phosphatidylinositol N-acetylglucosaminyltransferase subunit Y	PATH:01100	Metabolic pathways	0.823246	0.88785
Tgfb3	Tgfb3	Transforming growth factor beta-3	PATH:05414	Dilated cardiomyopathy	0.250658	1.47569
Tgfb3	Tgfb3	Transforming growth factor beta-3	PATH:05321	Inflammatory bowel disease (IBD)	0.663418	0.890419
Tgfb3	Tgfb3	Transforming growth factor beta-3	PATH:05211	Renal cell carcinoma	0.138563	1.82412
Tgfb3	Tgfb3	Transforming growth factor beta-3	PATH:05200	Pathways in cancer	0.0256076	1.5968
Tgfb3	Tgfb3	Transforming growth factor beta-3	PATH:05145	Toxoplasmosis	0.231668	1.4036
Tgfb3	Tgfb3	Transforming growth factor beta-3	PATH:04110	Cell cycle	0.107128	1.66777
Tgfb3	Tgfb3	Transforming growth factor beta-3	PATH:05210	Colorectal cancer	0.0389141	2.38794
Tgfb3	Tgfb3	Transforming growth factor beta-3	PATH:05166	HTLV-I infection	0.180319	1.31337
Tgfb3	Tgfb3	Transforming growth factor beta-3	PATH:05144	Malaria	0.857316	0.525347
Tgfb3	Tgfb3	Transforming growth factor beta-3	PATH:04144	Endocytosis	0.136617	1.42628
Tgfb3	Tgfb3	Transforming growth factor beta-3	PATH:05323	Rheumatoid arthritis	0.398048	1.25083
Tgfb3	Tgfb3	Transforming growth factor beta-3	PATH:04068	FoxO signaling pathway	0.409111	1.16744
Tgfb3	Tgfb3	Transforming growth factor beta-3	PATH:05410	Hypertrophic cardiomyopathy (HCM)	0.215341	1.56353
Tgfb3	Tgfb3	Transforming growth factor beta-3	PATH:05212	Pancreatic cancer	0.127146	1.87624
Tgfb3	Tgfb3	Transforming growth factor beta-3	PATH:05146	Amoebiasis	0.037271	1.98661
Tgfb3	Tgfb3	Transforming growth factor beta-3	PATH:05152	Tuberculosis	0.36687	1.18056
Tgfb3	Tgfb3	Transforming growth factor beta-3	PATH:05140	Leishmaniasis	0.100639	2.02057
Tgfb3	Tgfb3	Transforming growth factor beta-3	PATH:05220	Chronic myeloid leukemia	0.144435	1.79913
Tgfb3	Tgfb3	Transforming growth factor beta-3	PATH:04350	TGF-beta signaling pathway	0.250658	1.47569
Tgfb3	Tgfb3	Transforming growth factor beta-3	PATH:05142	Chagas disease (American trypanosomiasis)	0.0971352	1.78516
Tgfb3	Tgfb3	Transforming growth factor beta-3	PATH:04010	MAPK signaling pathway	0.00339727	1.93855
Tgfb3	Tgfb3	Transforming growth factor beta-3	PATH:05161	Hepatitis B	0.187557	1.44923
Tgfb3	Tgfb3	Transforming growth factor beta-3	PATH:04390	Hippo signaling pathway	0.0142745	2.04681
Tgfb3	Tgfb3	Transforming growth factor beta-3	PATH:04060	Cytokine-cytokine receptor interaction	0.681337	0.895478
Nme6	Nme6	Nucleoside diphosphate kinase 6	PATH:00240	Pyrimidine metabolism	0.578707	0.991221
Nme6	Nme6	Nucleoside diphosphate kinase 6	PATH:00230	Purine metabolism	0.137316	1.48403
Nme6	Nme6	Nucleoside diphosphate kinase 6	PATH:01100	Metabolic pathways	0.823246	0.88785
Ncstn	Ncstn	Nicastrin	PATH:04330	Notch signaling pathway	0.286055	1.60821
Ncstn	Ncstn	Nicastrin	PATH:05010	Alzheimer's disease	0.372701	1.17396
Ercc6	Ercc6	Ercc6 protein	PATH:03420	Nucleotide excision repair	0.234218	1.79096
Mep1a	Mep1a	Meprin A subunit alpha	PATH:04974	Protein digestion and absorption	0.858655	0.590278
Aff1	Aff1	Aff1 protein	PATH:05202	Transcriptional misregulation in cancer	0.00821185	2.05443
Slc4a1	Slc4a1	Band 3 anion transport protein	PATH:04966	Collecting duct acid secretion	0.649996	0.972865
Olfr589	Olfr589	Olfactory receptor MOR32-3	PATH:04740	Olfactory transduction	1	0.344329
Tnr	Tnr	Tenascin-R	PATH:04151	PI3K-Akt signaling pathway	0.688585	0.900595
Tnr	Tnr	Tenascin-R	PATH:04510	Focal adhesion	0.053775	1.64171
Tnr	Tnr	Tenascin-R	PATH:05206	MicroRNAs in cancer	0.453026	1.07015
Tnr	Tnr	Tenascin-R	PATH:04512	ECM-receptor interaction	0.672199	0.875579
Abcg8	Abcg8	ATP-binding cassette sub-family G member 8	PATH:02010	ABC transporters	0.0295968	2.85515
Abcg8	Abcg8	ATP-binding cassette sub-family G member 8	PATH:04976	Bile secretion	0.2935	1.4593
Abcg8	Abcg8	ATP-binding cassette sub-family G member 8	PATH:04975	Fat digestion and absorption	0.213976	1.87624
Ccnd3	Ccnd3	G1/S-specific cyclin-D3	PATH:04110	Cell cycle	0.107128	1.66777
Ccnd3	Ccnd3	G1/S-specific cyclin-D3	PATH:05166	HTLV-I infection	0.180319	1.31337
Ccnd3	Ccnd3	G1/S-specific cyclin-D3	PATH:04310	Wnt signaling pathway	0.017184	1.99499
Ccnd3	Ccnd3	G1/S-specific cyclin-D3	PATH:04630	Jak-STAT signaling pathway	0.383501	1.17866
Ccnd3	Ccnd3	G1/S-specific cyclin-D3	PATH:05162	Measles	0.422815	1.1504
Ccnd3	Ccnd3	G1/S-specific cyclin-D3	PATH:04151	PI3K-Akt signaling pathway	0.688585	0.900595
Ccnd3	Ccnd3	G1/S-specific cyclin-D3	PATH:04390	Hippo signaling pathway	0.0142745	2.04681
Ccnd3	Ccnd3	G1/S-specific cyclin-D3	PATH:04510	Focal adhesion	0.053775	1.64171
Ccnd3	Ccnd3	G1/S-specific cyclin-D3	PATH:05203	Viral carcinogenesis	0.0132559	1.84332
Ccnd3	Ccnd3	G1/S-specific cyclin-D3	PATH:04115	p53 signaling pathway	0.73779	0.772569
Shank1	Shank1	SH3 and multiple ankyrin repeat domains protein 1	PATH:04724	Glutamatergic synapse	0.0549008	1.84692
Coq7	Coq7	Ubiquinone biosynthesis protein COQ7 homolog	PATH:00130	Ubiquinone and other terpenoid-quinone biosynthesis	0.32184	2.62674
Coq7	Coq7	Ubiquinone biosynthesis protein COQ7 homolog	PATH:01100	Metabolic pathways	0.823246	0.88785
Cyb5r2	Cyb5r2	NADH-cytochrome b5 reductase 2	PATH:00520	Amino sugar and nucleotide sugar metabolism	0.108746	2.18895
Cdk14	Cdk14	Cyclin-dependent kinase 14	PATH:05202	Transcriptional misregulation in cancer	0.00821185	2.05443
Pofut2	Pofut2	Protein O-fucosyltransferase 2, isoform CRA_b	PATH:00514	Other types of O-glycan biosynthesis	0.561992	1.07214
Nlgn1	Nlgn1	Neuroligin-1	PATH:04514	Cell adhesion molecules (CAMs)	0.529771	1.03009
Actn2	Actn2	Alpha-actinin-2	PATH:04530	Tight junction	0.00182761	2.52945
Actn2	Actn2	Alpha-actinin-2	PATH:05322	Systemic lupus erythematosus	0.333381	1.24238
Actn2	Actn2	Alpha-actinin-2	PATH:05146	Amoebiasis	0.037271	1.98661
Actn2	Actn2	Alpha-actinin-2	PATH:04520	Adherens junction	0.00138713	3.32967
Actn2	Actn2	Alpha-actinin-2	PATH:04670	Leukocyte transendothelial migration	0.0866224	1.75116
Actn2	Actn2	Alpha-actinin-2	PATH:04510	Focal adhesion	0.053775	1.64171
Actn2	Actn2	Alpha-actinin-2	PATH:05412	Arrhythmogenic right ventricular cardiomyopathy (ARVC)	0.310812	1.41986
Actn2	Actn2	Alpha-actinin-2	PATH:05203	Viral carcinogenesis	0.0132559	1.84332
Actn2	Actn2	Alpha-actinin-2	PATH:04810	Regulation of actin cytoskeleton	0.216904	1.31337
Il33	Il33	Interleukin-33	PATH:05164	Influenza A	0.47128	1.0816
Il33	Il33	Interleukin-33	PATH:04623	Cytosolic DNA-sensing pathway	0.914183	0.416942
Fmo9	Fmo9	Dimethylaniline monooxygenase [N-oxide-forming]	PATH:00982	Drug metabolism - cytochrome P450	0.727212	0.804103
Eif4g2	Eif4g2	Eukaryotic translation initiation factor 4, gamma 2, isoform CRA_e	PATH:03013	RNA transport	0.47128	1.0816
Eif4g2	Eif4g2	Eukaryotic translation initiation factor 4, gamma 2, isoform CRA_e	PATH:05416	Viral myocarditis	0.96904	0.295139
Pde1a	Pde1a	Calcium/calmodulin-dependent 3',5'-cyclic nucleotide phosphodiesterase 1A	PATH:00230	Purine metabolism	0.137316	1.48403
Pde1a	Pde1a	Calcium/calmodulin-dependent 3',5'-cyclic nucleotide phosphodiesterase 1A	PATH:04020	Calcium signaling pathway	0.171365	1.41222
Pde1a	Pde1a	Calcium/calmodulin-dependent 3',5'-cyclic nucleotide phosphodiesterase 1A	PATH:05032	Morphine addiction	0.00249349	2.85515
Pde1a	Pde1a	Calcium/calmodulin-dependent 3',5'-cyclic nucleotide phosphodiesterase 1A	PATH:04742	Taste transduction	0.698373	0.833884
Pex11a	Pex11a	Putative uncharacterized protein	PATH:04146	Peroxisome	0.38063	1.28133
Gm17748	Gm17748	predicted gene, 17748	PATH:03040	Spliceosome	0.776902	0.761373
Hk1	Hk1	Hexokinase 1	PATH:04066	HIF-1 signaling pathway	0.241202	1.43277
Hk1	Hk1	Hexokinase 1	PATH:00010	Glycolysis / Gluconeogenesis	0.698373	0.833884
Hk1	Hk1	Hexokinase 1	PATH:00051	Fructose and mannose metabolism	0.789157	0.656684
Hk1	Hk1	Hexokinase 1	PATH:00052	Galactose metabolism	0.120714	2.46257
Hk1	Hk1	Hexokinase 1	PATH:04910	Insulin signaling pathway	0.46362	1.10213
Hk1	Hk1	Hexokinase 1	PATH:00520	Amino sugar and nucleotide sugar metabolism	0.108746	2.18895
Hk1	Hk1	Hexokinase 1	PATH:01200	Carbon metabolism	0.790746	0.722955
Hk1	Hk1	Hexokinase 1	PATH:01100	Metabolic pathways	0.823246	0.88785
Hk1	Hk1	Hexokinase 1	PATH:00524	Butirosin and neomycin biosynthesis	0.176441	5.25347
Hk1	Hk1	Hexokinase 1	PATH:04973	Carbohydrate digestion and absorption	0.0271962	2.9186
Hk1	Hk1	Hexokinase 1	PATH:04930	Type II diabetes mellitus	0.121555	2.10139
Hk1	Hk1	Hexokinase 1	PATH:00500	Starch and sucrose metabolism	0.328157	1.48683
Fos	Fos	Proto-oncogene c-Fos	PATH:04915	Estrogen signaling pathway	0.0327268	2.14427
Fos	Fos	Proto-oncogene c-Fos	PATH:04728	Dopaminergic synapse	0.134135	1.57999
Fos	Fos	Proto-oncogene c-Fos	PATH:04917	Prolactin signaling pathway	0.310812	1.41986
Fos	Fos	Proto-oncogene c-Fos	PATH:04921	Oxytocin signaling pathway	0.0787806	1.66249
Fos	Fos	Proto-oncogene c-Fos	PATH:04668	TNF signaling pathway	0.401076	1.20492
Fos	Fos	Proto-oncogene c-Fos	PATH:04713	Circadian entrainment	0.0792663	1.87624
Fos	Fos	Proto-oncogene c-Fos	PATH:04725	Cholinergic synapse	0.0279559	2.09209
Fos	Fos	Proto-oncogene c-Fos	PATH:04620	Toll-like receptor signaling pathway	0.340049	1.30036
Fos	Fos	Proto-oncogene c-Fos	PATH:05200	Pathways in cancer	0.0256076	1.5968
Fos	Fos	Proto-oncogene c-Fos	PATH:04660	T cell receptor signaling pathway	0.00947948	2.36643
Fos	Fos	Proto-oncogene c-Fos	PATH:05210	Colorectal cancer	0.0389141	2.38794
Fos	Fos	Proto-oncogene c-Fos	PATH:05166	HTLV-I infection	0.180319	1.31337
Fos	Fos	Proto-oncogene c-Fos	PATH:05133	Pertussis	0.539325	1.06489
Fos	Fos	Proto-oncogene c-Fos	PATH:05323	Rheumatoid arthritis	0.398048	1.25083
Fos	Fos	Proto-oncogene c-Fos	PATH:04662	B cell receptor signaling pathway	0.0722752	2.04681
Fos	Fos	Proto-oncogene c-Fos	PATH:05168	Herpes simplex infection	0.884106	0.656684
Fos	Fos	Proto-oncogene c-Fos	PATH:05031	Amphetamine addiction	0.0154666	2.6648
Fos	Fos	Proto-oncogene c-Fos	PATH:05140	Leishmaniasis	0.100639	2.02057
Fos	Fos	Proto-oncogene c-Fos	PATH:05132	Salmonella infection	0.0796861	1.99499
Fos	Fos	Proto-oncogene c-Fos	PATH:05142	Chagas disease (American trypanosomiasis)	0.0971352	1.78516
Fos	Fos	Proto-oncogene c-Fos	PATH:04010	MAPK signaling pathway	0.00339727	1.93855
Fos	Fos	Proto-oncogene c-Fos	PATH:05161	Hepatitis B	0.187557	1.44923
Fos	Fos	Proto-oncogene c-Fos	PATH:04380	Osteoclast differentiation	0.0527148	1.86147
Abca1	Abca1	ATP-binding cassette sub-family A member 1	PATH:02010	ABC transporters	0.0295968	2.85515
Abca1	Abca1	ATP-binding cassette sub-family A member 1	PATH:04975	Fat digestion and absorption	0.213976	1.87624
Olfr606	Olfr606	Olfactory receptor	PATH:04740	Olfactory transduction	1	0.344329
Il6st	Il6st	Interleukin-6 signal transductor	PATH:04630	Jak-STAT signaling pathway	0.383501	1.17866
Il6st	Il6st	Interleukin-6 signal transductor	PATH:04060	Cytokine-cytokine receptor interaction	0.681337	0.895478
Il6st	Il6st	Interleukin-6 signal transductor	PATH:05203	Viral carcinogenesis	0.0132559	1.84332
Pik3c2g	Pik3c2g	Phosphatidylinositol 4-phosphate 3-kinase C2 domain-containing subunit gamma	PATH:04070	Phosphatidylinositol signaling system	0.00348967	2.9186
Pik3c2g	Pik3c2g	Phosphatidylinositol 4-phosphate 3-kinase C2 domain-containing subunit gamma	PATH:00562	Inositol phosphate metabolism	0.0277891	2.58367
Pik3c2g	Pik3c2g	Phosphatidylinositol 4-phosphate 3-kinase C2 domain-containing subunit gamma	PATH:01100	Metabolic pathways	0.823246	0.88785
Id2	Id2	DNA-binding protein inhibitor ID-2	PATH:05202	Transcriptional misregulation in cancer	0.00821185	2.05443
Id2	Id2	DNA-binding protein inhibitor ID-2	PATH:04350	TGF-beta signaling pathway	0.250658	1.47569
Id2	Id2	DNA-binding protein inhibitor ID-2	PATH:04390	Hippo signaling pathway	0.0142745	2.04681
Mbl2	Mbl2	Mannose-binding protein C	PATH:04145	Phagosome	0.489779	1.06284
Mbl2	Mbl2	Mannose-binding protein C	PATH:05150	Staphylococcus aureus infection	0.583908	1.03009
Mbl2	Mbl2	Mannose-binding protein C	PATH:04610	Complement and coagulation cascades	0.948432	0.345623
Ugcg	Ugcg	Ceramide glucosyltransferase	PATH:01100	Metabolic pathways	0.823246	0.88785
Ugcg	Ugcg	Ceramide glucosyltransferase	PATH:00600	Sphingolipid metabolism	0.826541	0.583719
Card6	Card6	Protein Card6	PATH:04621	NOD-like receptor signaling pathway	0.681286	0.861225
Syt1	Syt1	Synaptotagmin-1	PATH:04721	Synaptic vesicle cycle	0.914183	0.416942
Rasgrp4	Rasgrp4	RAS guanyl-releasing protein 4	PATH:04014	Ras signaling pathway	0.0524839	1.61291
Rasgrp4	Rasgrp4	RAS guanyl-releasing protein 4	PATH:04010	MAPK signaling pathway	0.00339727	1.93855
Gstk1	Gstk1	Glutathione S-transferase kappa 1	PATH:04146	Peroxisome	0.38063	1.28133
Gstk1	Gstk1	Glutathione S-transferase kappa 1	PATH:00480	Glutathione metabolism	0.887146	0.46906
Gstk1	Gstk1	Glutathione S-transferase kappa 1	PATH:00982	Drug metabolism - cytochrome P450	0.727212	0.804103
Gstk1	Gstk1	Glutathione S-transferase kappa 1	PATH:00980	Metabolism of xenobiotics by cytochrome P450	0.714174	0.820855
Gstk1	Gstk1	Glutathione S-transferase kappa 1	PATH:05204	Chemical carcinogenesis	0.466618	1.14206
Pmvk	Pmvk	Phosphomevalonate kinase	PATH:00900	Terpenoid backbone biosynthesis	0.203445	2.38794
Pmvk	Pmvk	Phosphomevalonate kinase	PATH:04146	Peroxisome	0.38063	1.28133
Pmvk	Pmvk	Phosphomevalonate kinase	PATH:01100	Metabolic pathways	0.823246	0.88785
Sema3a	Sema3a	Semaphorin-3A	PATH:04360	Axon guidance	0.0129914	2.15628
D1Pas1	D1Pas1	DNA segment, Chr 1, Pasteur Institute 1	PATH:05161	Hepatitis B	0.187557	1.44923
D1Pas1	D1Pas1	DNA segment, Chr 1, Pasteur Institute 1	PATH:05203	Viral carcinogenesis	0.0132559	1.84332
D1Pas1	D1Pas1	DNA segment, Chr 1, Pasteur Institute 1	PATH:04622	RIG-I-like receptor signaling pathway	0.259324	1.54514
Cdc42	Cdc42	Cell division control protein 42 homolog	PATH:04932	Non-alcoholic fatty liver disease (NAFLD)	0.370916	1.19397
Cdc42	Cdc42	Cell division control protein 42 homolog	PATH:04912	GnRH signaling pathway	0.0897393	1.82051
Cdc42	Cdc42	Cell division control protein 42 homolog	PATH:04510	Focal adhesion	0.053775	1.64171
Cdc42	Cdc42	Cell division control protein 42 homolog	PATH:04015	Rap1 signaling pathway	0.0035219	2.06734
Cdc42	Cdc42	Cell division control protein 42 homolog	PATH:05203	Viral carcinogenesis	0.0132559	1.84332
Cdc42	Cdc42	Cell division control protein 42 homolog	PATH:04666	Fc gamma R-mediated phagocytosis	0.0497844	2.08945
Cdc42	Cdc42	Cell division control protein 42 homolog	PATH:05205	Proteoglycans in cancer	0.0254151	1.74341
Cdc42	Cdc42	Cell division control protein 42 homolog	PATH:04810	Regulation of actin cytoskeleton	0.216904	1.31337
Cdc42	Cdc42	Cell division control protein 42 homolog	PATH:04722	Neurotrophin signaling pathway	0.409111	1.16744
Cdc42	Cdc42	Cell division control protein 42 homolog	PATH:05211	Renal cell carcinoma	0.138563	1.82412
Cdc42	Cdc42	Cell division control protein 42 homolog	PATH:05200	Pathways in cancer	0.0256076	1.5968
Cdc42	Cdc42	Cell division control protein 42 homolog	PATH:04660	T cell receptor signaling pathway	0.00947948	2.36643
Cdc42	Cdc42	Cell division control protein 42 homolog	PATH:05100	Bacterial invasion of epithelial cells	0.0302185	2.32749
Cdc42	Cdc42	Cell division control protein 42 homolog	PATH:04144	Endocytosis	0.136617	1.42628
Cdc42	Cdc42	Cell division control protein 42 homolog	PATH:04530	Tight junction	0.00182761	2.52945
Cdc42	Cdc42	Cell division control protein 42 homolog	PATH:05212	Pancreatic cancer	0.127146	1.87624
Cdc42	Cdc42	Cell division control protein 42 homolog	PATH:04520	Adherens junction	0.00138713	3.32967
Cdc42	Cdc42	Cell division control protein 42 homolog	PATH:04014	Ras signaling pathway	0.0524839	1.61291
Cdc42	Cdc42	Cell division control protein 42 homolog	PATH:04370	VEGF signaling pathway	0.0284294	2.35733
Cdc42	Cdc42	Cell division control protein 42 homolog	PATH:04062	Chemokine signaling pathway	0.494867	1.05069
Cdc42	Cdc42	Cell division control protein 42 homolog	PATH:04360	Axon guidance	0.0129914	2.15628
Cdc42	Cdc42	Cell division control protein 42 homolog	PATH:05132	Salmonella infection	0.0796861	1.99499
Cdc42	Cdc42	Cell division control protein 42 homolog	PATH:04670	Leukocyte transendothelial migration	0.0866224	1.75116
Cdc42	Cdc42	Cell division control protein 42 homolog	PATH:04010	MAPK signaling pathway	0.00339727	1.93855
Pi4ka	Pi4ka	Protein Pi4ka	PATH:04070	Phosphatidylinositol signaling system	0.00348967	2.9186
Pi4ka	Pi4ka	Protein Pi4ka	PATH:00562	Inositol phosphate metabolism	0.0277891	2.58367
Pi4ka	Pi4ka	Protein Pi4ka	PATH:01100	Metabolic pathways	0.823246	0.88785
Dcn	Dcn	Decorin	PATH:04350	TGF-beta signaling pathway	0.250658	1.47569
Dcn	Dcn	Decorin	PATH:05205	Proteoglycans in cancer	0.0254151	1.74341
Lama3	Lama3	Putative uncharacterized protein	PATH:05222	Small cell lung cancer	0.250658	1.47569
Lama3	Lama3	Putative uncharacterized protein	PATH:05200	Pathways in cancer	0.0256076	1.5968
Lama3	Lama3	Putative uncharacterized protein	PATH:05145	Toxoplasmosis	0.231668	1.4036
Lama3	Lama3	Putative uncharacterized protein	PATH:05146	Amoebiasis	0.037271	1.98661
Lama3	Lama3	Putative uncharacterized protein	PATH:04151	PI3K-Akt signaling pathway	0.688585	0.900595
Lama3	Lama3	Putative uncharacterized protein	PATH:04510	Focal adhesion	0.053775	1.64171
Lama3	Lama3	Putative uncharacterized protein	PATH:04512	ECM-receptor interaction	0.672199	0.875579
Cdc14a	Cdc14a	Dual specificity protein phosphatase CDC14A	PATH:04110	Cell cycle	0.107128	1.66777
Rnf7	Rnf7	RING-box protein 2	PATH:04120	Ubiquitin mediated proteolysis	0.164273	1.50099
4930544G11Rik	4930544G11Rik	Testis specific expressed protein 5	PATH:04921	Oxytocin signaling pathway	0.0787806	1.66249
4930544G11Rik	4930544G11Rik	Testis specific expressed protein 5	PATH:04722	Neurotrophin signaling pathway	0.409111	1.16744
4930544G11Rik	4930544G11Rik	Testis specific expressed protein 5	PATH:04660	T cell receptor signaling pathway	0.00947948	2.36643
4930544G11Rik	4930544G11Rik	Testis specific expressed protein 5	PATH:04022	cGMP-PKG signaling pathway	0.113573	1.54514
4930544G11Rik	4930544G11Rik	Testis specific expressed protein 5	PATH:05210	Colorectal cancer	0.0389141	2.38794
4930544G11Rik	4930544G11Rik	Testis specific expressed protein 5	PATH:05133	Pertussis	0.539325	1.06489
4930544G11Rik	4930544G11Rik	Testis specific expressed protein 5	PATH:04144	Endocytosis	0.136617	1.42628
4930544G11Rik	4930544G11Rik	Testis specific expressed protein 5	PATH:04520	Adherens junction	0.00138713	3.32967
4930544G11Rik	4930544G11Rik	Testis specific expressed protein 5	PATH:05152	Tuberculosis	0.36687	1.18056
4930544G11Rik	4930544G11Rik	Testis specific expressed protein 5	PATH:04062	Chemokine signaling pathway	0.494867	1.05069
4930544G11Rik	4930544G11Rik	Testis specific expressed protein 5	PATH:04360	Axon guidance	0.0129914	2.15628
4930544G11Rik	4930544G11Rik	Testis specific expressed protein 5	PATH:04972	Pancreatic secretion	0.385823	1.22745
4930544G11Rik	4930544G11Rik	Testis specific expressed protein 5	PATH:04510	Focal adhesion	0.053775	1.64171
4930544G11Rik	4930544G11Rik	Testis specific expressed protein 5	PATH:04015	Rap1 signaling pathway	0.0035219	2.06734
4930544G11Rik	4930544G11Rik	Testis specific expressed protein 5	PATH:05203	Viral carcinogenesis	0.0132559	1.84332
4930544G11Rik	4930544G11Rik	Testis specific expressed protein 5	PATH:05206	MicroRNAs in cancer	0.453026	1.07015
4930544G11Rik	4930544G11Rik	Testis specific expressed protein 5	PATH:04611	Platelet activation	0.381639	1.20309
4930544G11Rik	4930544G11Rik	Testis specific expressed protein 5	PATH:05205	Proteoglycans in cancer	0.0254151	1.74341
4930544G11Rik	4930544G11Rik	Testis specific expressed protein 5	PATH:04810	Regulation of actin cytoskeleton	0.216904	1.31337
4930544G11Rik	4930544G11Rik	Testis specific expressed protein 5	PATH:05200	Pathways in cancer	0.0256076	1.5968
4930544G11Rik	4930544G11Rik	Testis specific expressed protein 5	PATH:05100	Bacterial invasion of epithelial cells	0.0302185	2.32749
4930544G11Rik	4930544G11Rik	Testis specific expressed protein 5	PATH:04530	Tight junction	0.00182761	2.52945
4930544G11Rik	4930544G11Rik	Testis specific expressed protein 5	PATH:04310	Wnt signaling pathway	0.017184	1.99499
4930544G11Rik	4930544G11Rik	Testis specific expressed protein 5	PATH:04014	Ras signaling pathway	0.0524839	1.61291
4930544G11Rik	4930544G11Rik	Testis specific expressed protein 5	PATH:04350	TGF-beta signaling pathway	0.250658	1.47569
4930544G11Rik	4930544G11Rik	Testis specific expressed protein 5	PATH:04670	Leukocyte transendothelial migration	0.0866224	1.75116
4930544G11Rik	4930544G11Rik	Testis specific expressed protein 5	PATH:04270	Vascular smooth muscle contraction	0.0571451	1.83261
Vegfb	Vegfb	Vascular endothelial growth factor B	PATH:05211	Renal cell carcinoma	0.138563	1.82412
Vegfb	Vegfb	Vascular endothelial growth factor B	PATH:05200	Pathways in cancer	0.0256076	1.5968
Vegfb	Vegfb	Vascular endothelial growth factor B	PATH:05323	Rheumatoid arthritis	0.398048	1.25083
Vegfb	Vegfb	Vascular endothelial growth factor B	PATH:05212	Pancreatic cancer	0.127146	1.87624
Vegfb	Vegfb	Vascular endothelial growth factor B	PATH:04014	Ras signaling pathway	0.0524839	1.61291
Vegfb	Vegfb	Vascular endothelial growth factor B	PATH:04150	mTOR signaling pathway	0.100639	2.02057
Vegfb	Vegfb	Vascular endothelial growth factor B	PATH:04151	PI3K-Akt signaling pathway	0.688585	0.900595
Vegfb	Vegfb	Vascular endothelial growth factor B	PATH:05219	Bladder cancer	0.804988	0.625413
Vegfb	Vegfb	Vascular endothelial growth factor B	PATH:04060	Cytokine-cytokine receptor interaction	0.681337	0.895478
Vegfb	Vegfb	Vascular endothelial growth factor B	PATH:04510	Focal adhesion	0.053775	1.64171
Vegfb	Vegfb	Vascular endothelial growth factor B	PATH:04015	Rap1 signaling pathway	0.0035219	2.06734
Esr2	Esr2	Estrogen receptor beta	PATH:04915	Estrogen signaling pathway	0.0327268	2.14427
Esr2	Esr2	Estrogen receptor beta	PATH:04917	Prolactin signaling pathway	0.310812	1.41986
Mycn	Mycn	N-myc proto-oncogene protein	PATH:05202	Transcriptional misregulation in cancer	0.00821185	2.05443
Rpl26	Rpl26	60S ribosomal protein L26	PATH:03010	Ribosome	0.703885	0.852836
Lpcat1	Lpcat1	Lysophosphatidylcholine acyltransferase 1	PATH:00564	Glycerophospholipid metabolism	0.243474	1.49246
Lpcat1	Lpcat1	Lysophosphatidylcholine acyltransferase 1	PATH:01100	Metabolic pathways	0.823246	0.88785
Lpcat1	Lpcat1	Lysophosphatidylcholine acyltransferase 1	PATH:00565	Ether lipid metabolism	0.427469	1.38249
Mthfsl	Gm2382	5-formyltetrahydrofolate cyclo-ligase	PATH:00670	One carbon pool by folate	0.0336775	4.14748
Mthfsl	Gm2382	5-formyltetrahydrofolate cyclo-ligase	PATH:01100	Metabolic pathways	0.823246	0.88785
Pde4d	Pde4d	Phosphodiesterase 4D, cAMP specific	PATH:00230	Purine metabolism	0.137316	1.48403
Pde4d	Pde4d	Phosphodiesterase 4D, cAMP specific	PATH:05032	Morphine addiction	0.00249349	2.85515
Cirh1a	Cirh1a	Putative uncharacterized protein	PATH:03008	Ribosome biogenesis in eukaryotes	0.201683	1.60167
Sgol1	Sgol1	Shugoshin-like 1	PATH:04114	Oocyte meiosis	0.0631886	1.87624
Runx1t1	Runx1t1	Protein CBFA2T1	PATH:05200	Pathways in cancer	0.0256076	1.5968
Runx1t1	Runx1t1	Protein CBFA2T1	PATH:05221	Acute myeloid leukemia	0.170945	1.84332
Runx1t1	Runx1t1	Protein CBFA2T1	PATH:05202	Transcriptional misregulation in cancer	0.00821185	2.05443
Pcf11	Pcf11	PCF11	PATH:03015	mRNA surveillance pathway	0.491643	1.10599
Sirt1	Sirt1	Sirt1 protein	PATH:04068	FoxO signaling pathway	0.409111	1.16744
Sirt1	Sirt1	Sirt1 protein	PATH:05031	Amphetamine addiction	0.0154666	2.6648
Sirt1	Sirt1	Sirt1 protein	PATH:05206	MicroRNAs in cancer	0.453026	1.07015
Agk	Agk	Acylglycerol kinase, mitochondrial	PATH:01100	Metabolic pathways	0.823246	0.88785
Agk	Agk	Acylglycerol kinase, mitochondrial	PATH:00561	Glycerolipid metabolism	0.128192	2.06019
Olfr1124	Olfr1124	Olfactory receptor Olfr1124	PATH:04740	Olfactory transduction	1	0.344329
Olfr599	Olfr599	Olfactory receptor	PATH:04740	Olfactory transduction	1	0.344329
Olfr474	Olfr474	Olfactory receptor 474	PATH:04740	Olfactory transduction	1	0.344329
Prkca	Prkca	Protein kinase C alpha type	PATH:04727	GABAergic synapse	0.250658	1.47569
Prkca	Prkca	Protein kinase C alpha type	PATH:04728	Dopaminergic synapse	0.134135	1.57999
Prkca	Prkca	Protein kinase C alpha type	PATH:04921	Oxytocin signaling pathway	0.0787806	1.66249
Prkca	Prkca	Protein kinase C alpha type	PATH:04723	Retrograde endocannabinoid signaling	0.0971352	1.78516
Prkca	Prkca	Protein kinase C alpha type	PATH:04724	Glutamatergic synapse	0.0549008	1.84692
Prkca	Prkca	Protein kinase C alpha type	PATH:04725	Cholinergic synapse	0.0279559	2.09209
Prkca	Prkca	Protein kinase C alpha type	PATH:04726	Serotonergic synapse	0.187557	1.44923
Prkca	Prkca	Protein kinase C alpha type	PATH:04961	Endocrine and other factor-regulated calcium reabsorption	0.349228	1.43277
Prkca	Prkca	Protein kinase C alpha type	PATH:05214	Glioma	0.234251	1.61645
Prkca	Prkca	Protein kinase C alpha type	PATH:04720	Long-term potentiation	0.121607	1.90343
Prkca	Prkca	Protein kinase C alpha type	PATH:04960	Aldosterone-regulated sodium reabsorption	0.234218	1.79096
Prkca	Prkca	Protein kinase C alpha type	PATH:04918	Thyroid hormone synthesis	0.284892	1.47985
Prkca	Prkca	Protein kinase C alpha type	PATH:04919	Thyroid hormone signaling pathway	0.293277	1.33563
Prkca	Prkca	Protein kinase C alpha type	PATH:04916	Melanogenesis	0.180779	1.57604
Prkca	Prkca	Protein kinase C alpha type	PATH:04911	Insulin secretion	0.236347	1.50962
Prkca	Prkca	Protein kinase C alpha type	PATH:04713	Circadian entrainment	0.0792663	1.87624
Prkca	Prkca	Protein kinase C alpha type	PATH:04912	GnRH signaling pathway	0.0897393	1.82051
Prkca	Prkca	Protein kinase C alpha type	PATH:04510	Focal adhesion	0.053775	1.64171
Prkca	Prkca	Protein kinase C alpha type	PATH:05206	MicroRNAs in cancer	0.453026	1.07015
Prkca	Prkca	Protein kinase C alpha type	PATH:05205	Proteoglycans in cancer	0.0254151	1.74341
Prkca	Prkca	Protein kinase C alpha type	PATH:05200	Pathways in cancer	0.0256076	1.5968
Prkca	Prkca	Protein kinase C alpha type	PATH:04750	Inflammatory mediator regulation of TRP channels	0.347355	1.25083
Prkca	Prkca	Protein kinase C alpha type	PATH:04310	Wnt signaling pathway	0.017184	1.99499
Prkca	Prkca	Protein kinase C alpha type	PATH:04150	mTOR signaling pathway	0.100639	2.02057
Prkca	Prkca	Protein kinase C alpha type	PATH:04151	PI3K-Akt signaling pathway	0.688585	0.900595
Prkca	Prkca	Protein kinase C alpha type	PATH:05164	Influenza A	0.47128	1.0816
Prkca	Prkca	Protein kinase C alpha type	PATH:04670	Leukocyte transendothelial migration	0.0866224	1.75116
Prkca	Prkca	Protein kinase C alpha type	PATH:04070	Phosphatidylinositol signaling system	0.00348967	2.9186
Prkca	Prkca	Protein kinase C alpha type	PATH:05161	Hepatitis B	0.187557	1.44923
Prkca	Prkca	Protein kinase C alpha type	PATH:04270	Vascular smooth muscle contraction	0.0571451	1.83261
Prkca	Prkca	Protein kinase C alpha type	PATH:04664	Fc epsilon RI signaling pathway	0.208475	1.58237
Prkca	Prkca	Protein kinase C alpha type	PATH:04666	Fc gamma R-mediated phagocytosis	0.0497844	2.08945
Prkca	Prkca	Protein kinase C alpha type	PATH:04066	HIF-1 signaling pathway	0.241202	1.43277
Prkca	Prkca	Protein kinase C alpha type	PATH:04540	Gap junction	0.243474	1.49246
Prkca	Prkca	Protein kinase C alpha type	PATH:05031	Amphetamine addiction	0.0154666	2.6648
Prkca	Prkca	Protein kinase C alpha type	PATH:04261	Adrenergic signaling in cardiomyocytes	0.217226	1.39165
Prkca	Prkca	Protein kinase C alpha type	PATH:04020	Calcium signaling pathway	0.171365	1.41222
Prkca	Prkca	Protein kinase C alpha type	PATH:05032	Morphine addiction	0.00249349	2.85515
Prkca	Prkca	Protein kinase C alpha type	PATH:04972	Pancreatic secretion	0.385823	1.22745
Prkca	Prkca	Protein kinase C alpha type	PATH:04730	Long-term depression	0.150413	1.77482
Prkca	Prkca	Protein kinase C alpha type	PATH:04015	Rap1 signaling pathway	0.0035219	2.06734
Prkca	Prkca	Protein kinase C alpha type	PATH:04650	Natural killer cell mediated cytotoxicity	0.313386	1.30251
Prkca	Prkca	Protein kinase C alpha type	PATH:04012	ErbB signaling pathway	0.113382	1.81154
Prkca	Prkca	Protein kinase C alpha type	PATH:04970	Salivary secretion	0.336945	1.36454
Prkca	Prkca	Protein kinase C alpha type	PATH:04530	Tight junction	0.00182761	2.52945
Prkca	Prkca	Protein kinase C alpha type	PATH:05223	Non-small cell lung cancer	0.163497	1.87624
Prkca	Prkca	Protein kinase C alpha type	PATH:05146	Amoebiasis	0.037271	1.98661
Prkca	Prkca	Protein kinase C alpha type	PATH:04971	Gastric acid secretion	0.539325	1.06489
Prkca	Prkca	Protein kinase C alpha type	PATH:04014	Ras signaling pathway	0.0524839	1.61291
Prkca	Prkca	Protein kinase C alpha type	PATH:04370	VEGF signaling pathway	0.0284294	2.35733
Prkca	Prkca	Protein kinase C alpha type	PATH:05143	African trypanosomiasis	0.137997	2.31771
Prkca	Prkca	Protein kinase C alpha type	PATH:04010	MAPK signaling pathway	0.00339727	1.93855
Gm15501	Gm15501	ribosomal protein S8 pseudogene	PATH:03010	Ribosome	0.703885	0.852836
Psma6	Psma6	Proteasome subunit alpha type-6	PATH:03050	Proteasome	0.833184	0.57103
Prkg2	Prkg2	cGMP-dependent protein kinase	PATH:04022	cGMP-PKG signaling pathway	0.113573	1.54514
Prkg2	Prkg2	cGMP-dependent protein kinase	PATH:04540	Gap junction	0.243474	1.49246
Prkg2	Prkg2	cGMP-dependent protein kinase	PATH:04970	Salivary secretion	0.336945	1.36454
Prkg2	Prkg2	cGMP-dependent protein kinase	PATH:04740	Olfactory transduction	1	0.344329
Prkg2	Prkg2	cGMP-dependent protein kinase	PATH:04713	Circadian entrainment	0.0792663	1.87624
Prkg2	Prkg2	cGMP-dependent protein kinase	PATH:04730	Long-term depression	0.150413	1.77482
Prkg2	Prkg2	cGMP-dependent protein kinase	PATH:04611	Platelet activation	0.381639	1.20309
Synj2	Synj2	Synaptojanin-2	PATH:04070	Phosphatidylinositol signaling system	0.00348967	2.9186
Synj2	Synj2	Synaptojanin-2	PATH:00562	Inositol phosphate metabolism	0.0277891	2.58367
Synj2	Synj2	Synaptojanin-2	PATH:01100	Metabolic pathways	0.823246	0.88785
Hnrnpk	Hnrnpk	Heterogeneous nuclear ribonucleoprotein K	PATH:05168	Herpes simplex infection	0.884106	0.656684
Hnrnpk	Hnrnpk	Heterogeneous nuclear ribonucleoprotein K	PATH:03040	Spliceosome	0.776902	0.761373
Hnrnpk	Hnrnpk	Heterogeneous nuclear ribonucleoprotein K	PATH:05203	Viral carcinogenesis	0.0132559	1.84332
Hnrnpk	Hnrnpk	Heterogeneous nuclear ribonucleoprotein K	PATH:05206	MicroRNAs in cancer	0.453026	1.07015
Slc26a4	Slc26a4	Solute carrier family 26, member 4	PATH:04918	Thyroid hormone synthesis	0.284892	1.47985
Cyp3a41a	Cyp3a41a	Cytochrome P450 3A41	PATH:00591	Linoleic acid metabolism	0.59456	1.01028
Cyp3a41a	Cyp3a41a	Cytochrome P450 3A41	PATH:00140	Steroid hormone biosynthesis	0.963774	0.309028
Cyp3a41a	Cyp3a41a	Cytochrome P450 3A41	PATH:00982	Drug metabolism - cytochrome P450	0.727212	0.804103
Cyp3a41a	Cyp3a41a	Cytochrome P450 3A41	PATH:00980	Metabolism of xenobiotics by cytochrome P450	0.714174	0.820855
Cyp3a41a	Cyp3a41a	Cytochrome P450 3A41	PATH:01100	Metabolic pathways	0.823246	0.88785
Cyp3a41a	Cyp3a41a	Cytochrome P450 3A41	PATH:05204	Chemical carcinogenesis	0.466618	1.14206
Cyp3a41a	Cyp3a41a	Cytochrome P450 3A41	PATH:00830	Retinol metabolism	0.970233	0.29186
Cyp3a41a	Cyp3a41a	Cytochrome P450 3A41	PATH:00983	Drug metabolism - other enzymes	0.452507	1.21234
Chrm5	Chrm5	Muscarinic acetylcholine receptor M5	PATH:04020	Calcium signaling pathway	0.171365	1.41222
Chrm5	Chrm5	Muscarinic acetylcholine receptor M5	PATH:04080	Neuroactive ligand-receptor interaction	0.187052	1.30405
Chrm5	Chrm5	Muscarinic acetylcholine receptor M5	PATH:04725	Cholinergic synapse	0.0279559	2.09209
Chrm5	Chrm5	Muscarinic acetylcholine receptor M5	PATH:04810	Regulation of actin cytoskeleton	0.216904	1.31337
Fhit	Fhit	Bis(5'-adenosyl)-triphosphatase	PATH:05222	Small cell lung cancer	0.250658	1.47569
Fhit	Fhit	Bis(5'-adenosyl)-triphosphatase	PATH:05223	Non-small cell lung cancer	0.163497	1.87624
Fhit	Fhit	Bis(5'-adenosyl)-triphosphatase	PATH:00230	Purine metabolism	0.137316	1.48403
Pard6b	Pard6b	Partitioning defective 6 homolog beta	PATH:04144	Endocytosis	0.136617	1.42628
Pard6b	Pard6b	Partitioning defective 6 homolog beta	PATH:04530	Tight junction	0.00182761	2.52945
Pard6b	Pard6b	Partitioning defective 6 homolog beta	PATH:04390	Hippo signaling pathway	0.0142745	2.04681
Pard6b	Pard6b	Partitioning defective 6 homolog beta	PATH:04015	Rap1 signaling pathway	0.0035219	2.06734
Ctnnbl1	Ctnnbl1	Putative uncharacterized protein	PATH:03040	Spliceosome	0.776902	0.761373
Xbp1	Xbp1	X-box-binding protein 1	PATH:05166	HTLV-I infection	0.180319	1.31337
Xbp1	Xbp1	X-box-binding protein 1	PATH:04141	Protein processing in endoplasmic reticulum	0.627756	0.932569
Xbp1	Xbp1	X-box-binding protein 1	PATH:04932	Non-alcoholic fatty liver disease (NAFLD)	0.370916	1.19397
Gabrg1	Gabrg1	GABA-A receptor gamma-1 subunit	PATH:04727	GABAergic synapse	0.250658	1.47569
Gabrg1	Gabrg1	GABA-A receptor gamma-1 subunit	PATH:05033	Nicotine addiction	0.453579	1.31337
Gabrg1	Gabrg1	GABA-A receptor gamma-1 subunit	PATH:05032	Morphine addiction	0.00249349	2.85515
Gabrg1	Gabrg1	GABA-A receptor gamma-1 subunit	PATH:04723	Retrograde endocannabinoid signaling	0.0971352	1.78516
Gabrg1	Gabrg1	GABA-A receptor gamma-1 subunit	PATH:04080	Neuroactive ligand-receptor interaction	0.187052	1.30405
Olfr307	Olfr307	Olfactory receptor	PATH:04740	Olfactory transduction	1	0.344329
Iqsec3	Iqsec3	IQ motif and SEC7 domain-containing protein 3	PATH:04144	Endocytosis	0.136617	1.42628
Ercc5	Ercc5	Excision repair cross-complementing rodent repair deficiency, complementation group 5	PATH:03420	Nucleotide excision repair	0.234218	1.79096
Sult2a3	Sult2a3	Sulfotransferase	PATH:04976	Bile secretion	0.2935	1.4593
Sult2a3	Sult2a3	Sulfotransferase	PATH:00980	Metabolism of xenobiotics by cytochrome P450	0.714174	0.820855
Sult2a3	Sult2a3	Sulfotransferase	PATH:05204	Chemical carcinogenesis	0.466618	1.14206
Epha3	Epha3	Receptor protein-tyrosine kinase	PATH:04360	Axon guidance	0.0129914	2.15628
Il1r2	Il1r2	Interleukin-1 receptor type 2	PATH:05166	HTLV-I infection	0.180319	1.31337
Il1r2	Il1r2	Interleukin-1 receptor type 2	PATH:05202	Transcriptional misregulation in cancer	0.00821185	2.05443
Il1r2	Il1r2	Interleukin-1 receptor type 2	PATH:04640	Hematopoietic cell lineage	0.845217	0.610869
Il1r2	Il1r2	Interleukin-1 receptor type 2	PATH:05146	Amoebiasis	0.037271	1.98661
Il1r2	Il1r2	Interleukin-1 receptor type 2	PATH:04010	MAPK signaling pathway	0.00339727	1.93855
Il1r2	Il1r2	Interleukin-1 receptor type 2	PATH:04060	Cytokine-cytokine receptor interaction	0.681337	0.895478
Mgat4a	Mgat4a	Alpha-1,3-mannosyl-glycoprotein 4-beta-N-acetylglucosaminyltransferase A	PATH:01100	Metabolic pathways	0.823246	0.88785
Mgat4a	Mgat4a	Alpha-1,3-mannosyl-glycoprotein 4-beta-N-acetylglucosaminyltransferase A	PATH:00510	N-Glycan biosynthesis	0.573052	1.05069
Mphosph10	Mphosph10	Mphosph10 protein	PATH:03008	Ribosome biogenesis in eukaryotes	0.201683	1.60167
Acox1	Acox1	Peroxisomal acyl-coenzyme A oxidase 1	PATH:01040	Biosynthesis of unsaturated fatty acids	0.621642	1.05069
Acox1	Acox1	Peroxisomal acyl-coenzyme A oxidase 1	PATH:00071	Fatty acid degradation	0.55073	1.09447
Acox1	Acox1	Peroxisomal acyl-coenzyme A oxidase 1	PATH:03320	PPAR signaling pathway	0.957616	0.324288
Acox1	Acox1	Peroxisomal acyl-coenzyme A oxidase 1	PATH:04146	Peroxisome	0.38063	1.28133
Acox1	Acox1	Peroxisomal acyl-coenzyme A oxidase 1	PATH:00592	alpha-Linolenic acid metabolism	0.246049	2.10139
Acox1	Acox1	Peroxisomal acyl-coenzyme A oxidase 1	PATH:01212	Fatty acid metabolism	0.857316	0.525347
Acox1	Acox1	Peroxisomal acyl-coenzyme A oxidase 1	PATH:01100	Metabolic pathways	0.823246	0.88785
Ube2q2	Ube2q2	Ubiquitin-conjugating enzyme E2 Q2	PATH:04120	Ubiquitin mediated proteolysis	0.164273	1.50099
Ccdc6	Ccdc6	Coiled-coil domain-containing protein 6	PATH:05200	Pathways in cancer	0.0256076	1.5968
Ccdc6	Ccdc6	Coiled-coil domain-containing protein 6	PATH:05216	Thyroid cancer	0.317405	1.75116
Hnmt	Hnmt	Histamine N-methyltransferase	PATH:00340	Histidine metabolism	0.663368	0.93812
C1galt1	C1galt1	Glycoprotein-N-acetylgalactosamine 3-beta-galactosyltransferase 1	PATH:01100	Metabolic pathways	0.823246	0.88785
C1galt1	C1galt1	Glycoprotein-N-acetylgalactosamine 3-beta-galactosyltransferase 1	PATH:00512	Mucin type O-Glycan biosynthesis	0.663368	0.93812
Etv5	Etv5	ETS translocation variant 5	PATH:05202	Transcriptional misregulation in cancer	0.00821185	2.05443
H2bfm	H2bfm	Protein H2bfm	PATH:05034	Alcoholism	0.881498	0.659984
H2bfm	H2bfm	Protein H2bfm	PATH:05322	Systemic lupus erythematosus	0.333381	1.24238
H2bfm	H2bfm	Protein H2bfm	PATH:05203	Viral carcinogenesis	0.0132559	1.84332
Rest	Rest	REST4	PATH:05016	Huntington's disease	0.85879	0.687627
Dusp3	Dusp3	Dual-specificity protein phosphatase 3	PATH:04010	MAPK signaling pathway	0.00339727	1.93855
Hmox2	Hmox2	Heme oxygenase 2	PATH:00860	Porphyrin and chlorophyll metabolism	0.812454	0.610869
Hmox2	Hmox2	Heme oxygenase 2	PATH:04978	Mineral absorption	0.839574	0.55888
Gli2	Gli2	GLI-Kruppel family member	PATH:05200	Pathways in cancer	0.0256076	1.5968
Gli2	Gli2	GLI-Kruppel family member	PATH:04340	Hedgehog signaling pathway	0.338698	1.4593
Gli2	Gli2	GLI-Kruppel family member	PATH:04390	Hippo signaling pathway	0.0142745	2.04681
Gli2	Gli2	GLI-Kruppel family member	PATH:05217	Basal cell carcinoma	0.349228	1.43277
Pde4b	Pde4b	Protein Pde4b	PATH:00230	Purine metabolism	0.137316	1.48403
Pde4b	Pde4b	Protein Pde4b	PATH:05032	Morphine addiction	0.00249349	2.85515
Dars	Dars	Putative uncharacterized protein	PATH:00970	Aminoacyl-tRNA biosynthesis	0.917477	0.410428
Aicda	Aicda	Single-stranded DNA cytosine deaminase	PATH:04672	Intestinal immune network for IgA production	0.527601	1.14206
Aicda	Aicda	Single-stranded DNA cytosine deaminase	PATH:05340	Primary immunodeficiency	0.387129	1.50099
Mpzl1	Mpzl1	Myelin protein zero-like protein 1	PATH:04514	Cell adhesion molecules (CAMs)	0.529771	1.03009
Gtf2a1	Gtf2a1	Gtf2a1 protein	PATH:03022	Basal transcription factors	0.254782	1.71309
Gtf2a1	Gtf2a1	Gtf2a1 protein	PATH:05203	Viral carcinogenesis	0.0132559	1.84332
Akt2	Akt2	RAC-beta serine/threonine-protein kinase	PATH:04728	Dopaminergic synapse	0.134135	1.57999
Akt2	Akt2	RAC-beta serine/threonine-protein kinase	PATH:05218	Melanoma	0.132799	1.84981
Akt2	Akt2	RAC-beta serine/threonine-protein kinase	PATH:04725	Cholinergic synapse	0.0279559	2.09209
Akt2	Akt2	RAC-beta serine/threonine-protein kinase	PATH:05215	Prostate cancer	0.441171	1.18056
Akt2	Akt2	RAC-beta serine/threonine-protein kinase	PATH:05214	Glioma	0.234251	1.61645
Akt2	Akt2	RAC-beta serine/threonine-protein kinase	PATH:04920	Adipocytokine signaling pathway	0.937266	0.369963
Akt2	Akt2	RAC-beta serine/threonine-protein kinase	PATH:04722	Neurotrophin signaling pathway	0.409111	1.16744
Akt2	Akt2	RAC-beta serine/threonine-protein kinase	PATH:05211	Renal cell carcinoma	0.138563	1.82412
Akt2	Akt2	RAC-beta serine/threonine-protein kinase	PATH:05210	Colorectal cancer	0.0389141	2.38794
Akt2	Akt2	RAC-beta serine/threonine-protein kinase	PATH:05213	Endometrial cancer	0.317615	1.51542
Akt2	Akt2	RAC-beta serine/threonine-protein kinase	PATH:05212	Pancreatic cancer	0.127146	1.87624
Akt2	Akt2	RAC-beta serine/threonine-protein kinase	PATH:04919	Thyroid hormone signaling pathway	0.293277	1.33563
Akt2	Akt2	RAC-beta serine/threonine-protein kinase	PATH:04914	Progesterone-mediated oocyte maturation	0.108824	1.83261
Akt2	Akt2	RAC-beta serine/threonine-protein kinase	PATH:04915	Estrogen signaling pathway	0.0327268	2.14427
Akt2	Akt2	RAC-beta serine/threonine-protein kinase	PATH:04917	Prolactin signaling pathway	0.310812	1.41986
Akt2	Akt2	RAC-beta serine/threonine-protein kinase	PATH:04910	Insulin signaling pathway	0.46362	1.10213
Akt2	Akt2	RAC-beta serine/threonine-protein kinase	PATH:04510	Focal adhesion	0.053775	1.64171
Akt2	Akt2	RAC-beta serine/threonine-protein kinase	PATH:05205	Proteoglycans in cancer	0.0254151	1.74341
Akt2	Akt2	RAC-beta serine/threonine-protein kinase	PATH:05200	Pathways in cancer	0.0256076	1.5968
Akt2	Akt2	RAC-beta serine/threonine-protein kinase	PATH:05166	HTLV-I infection	0.180319	1.31337
Akt2	Akt2	RAC-beta serine/threonine-protein kinase	PATH:05169	Epstein-Barr virus infection	0.69887	0.871429
Akt2	Akt2	RAC-beta serine/threonine-protein kinase	PATH:04630	Jak-STAT signaling pathway	0.383501	1.17866
Akt2	Akt2	RAC-beta serine/threonine-protein kinase	PATH:04150	mTOR signaling pathway	0.100639	2.02057
Akt2	Akt2	RAC-beta serine/threonine-protein kinase	PATH:05162	Measles	0.422815	1.1504
Akt2	Akt2	RAC-beta serine/threonine-protein kinase	PATH:04151	PI3K-Akt signaling pathway	0.688585	0.900595
Akt2	Akt2	RAC-beta serine/threonine-protein kinase	PATH:05164	Influenza A	0.47128	1.0816
Akt2	Akt2	RAC-beta serine/threonine-protein kinase	PATH:05161	Hepatitis B	0.187557	1.44923
Akt2	Akt2	RAC-beta serine/threonine-protein kinase	PATH:05160	Hepatitis C	0.89904	0.575198
Akt2	Akt2	RAC-beta serine/threonine-protein kinase	PATH:04668	TNF signaling pathway	0.401076	1.20492
Akt2	Akt2	RAC-beta serine/threonine-protein kinase	PATH:04664	Fc epsilon RI signaling pathway	0.208475	1.58237
Akt2	Akt2	RAC-beta serine/threonine-protein kinase	PATH:04620	Toll-like receptor signaling pathway	0.340049	1.30036
Akt2	Akt2	RAC-beta serine/threonine-protein kinase	PATH:04666	Fc gamma R-mediated phagocytosis	0.0497844	2.08945
Akt2	Akt2	RAC-beta serine/threonine-protein kinase	PATH:04660	T cell receptor signaling pathway	0.00947948	2.36643
Akt2	Akt2	RAC-beta serine/threonine-protein kinase	PATH:04066	HIF-1 signaling pathway	0.241202	1.43277
Akt2	Akt2	RAC-beta serine/threonine-protein kinase	PATH:04022	cGMP-PKG signaling pathway	0.113573	1.54514
Akt2	Akt2	RAC-beta serine/threonine-protein kinase	PATH:04662	B cell receptor signaling pathway	0.0722752	2.04681
Akt2	Akt2	RAC-beta serine/threonine-protein kinase	PATH:04068	FoxO signaling pathway	0.409111	1.16744
Akt2	Akt2	RAC-beta serine/threonine-protein kinase	PATH:05152	Tuberculosis	0.36687	1.18056
Akt2	Akt2	RAC-beta serine/threonine-protein kinase	PATH:04062	Chemokine signaling pathway	0.494867	1.05069
Akt2	Akt2	RAC-beta serine/threonine-protein kinase	PATH:04261	Adrenergic signaling in cardiomyocytes	0.217226	1.39165
Akt2	Akt2	RAC-beta serine/threonine-protein kinase	PATH:04380	Osteoclast differentiation	0.0527148	1.86147
Akt2	Akt2	RAC-beta serine/threonine-protein kinase	PATH:04932	Non-alcoholic fatty liver disease (NAFLD)	0.370916	1.19397
Akt2	Akt2	RAC-beta serine/threonine-protein kinase	PATH:04015	Rap1 signaling pathway	0.0035219	2.06734
Akt2	Akt2	RAC-beta serine/threonine-protein kinase	PATH:04973	Carbohydrate digestion and absorption	0.0271962	2.9186
Akt2	Akt2	RAC-beta serine/threonine-protein kinase	PATH:04611	Platelet activation	0.381639	1.20309
Akt2	Akt2	RAC-beta serine/threonine-protein kinase	PATH:05222	Small cell lung cancer	0.250658	1.47569
Akt2	Akt2	RAC-beta serine/threonine-protein kinase	PATH:05145	Toxoplasmosis	0.231668	1.4036
Akt2	Akt2	RAC-beta serine/threonine-protein kinase	PATH:05221	Acute myeloid leukemia	0.170945	1.84332
Akt2	Akt2	RAC-beta serine/threonine-protein kinase	PATH:04210	Apoptosis	0.236347	1.50962
Akt2	Akt2	RAC-beta serine/threonine-protein kinase	PATH:04012	ErbB signaling pathway	0.113382	1.81154
Akt2	Akt2	RAC-beta serine/threonine-protein kinase	PATH:04530	Tight junction	0.00182761	2.52945
Akt2	Akt2	RAC-beta serine/threonine-protein kinase	PATH:05223	Non-small cell lung cancer	0.163497	1.87624
Akt2	Akt2	RAC-beta serine/threonine-protein kinase	PATH:04014	Ras signaling pathway	0.0524839	1.61291
Akt2	Akt2	RAC-beta serine/threonine-protein kinase	PATH:04370	VEGF signaling pathway	0.0284294	2.35733
Akt2	Akt2	RAC-beta serine/threonine-protein kinase	PATH:05220	Chronic myeloid leukemia	0.144435	1.79913
Akt2	Akt2	RAC-beta serine/threonine-protein kinase	PATH:05142	Chagas disease (American trypanosomiasis)	0.0971352	1.78516
Akt2	Akt2	RAC-beta serine/threonine-protein kinase	PATH:04010	MAPK signaling pathway	0.00339727	1.93855
Mrpl35	Mrpl35	39S ribosomal protein L35, mitochondrial	PATH:03010	Ribosome	0.703885	0.852836
Nrg2	Nrg2	Pro-neuregulin-2, membrane-bound isoform	PATH:04012	ErbB signaling pathway	0.113382	1.81154
Fcf1	Fcf1	rRNA-processing protein FCF1 homolog	PATH:03008	Ribosome biogenesis in eukaryotes	0.201683	1.60167
Btg3	Btg3	B cell translocation gene 3	PATH:03018	RNA degradation	0.601125	0.972865
Tnfrsf21	Tnfrsf21	Putative uncharacterized protein	PATH:04060	Cytokine-cytokine receptor interaction	0.681337	0.895478
Ssr2	Ssr2	Signal sequence receptor, beta, isoform CRA_b	PATH:04141	Protein processing in endoplasmic reticulum	0.627756	0.932569
Sema4b	Sema4b	Semaphorin-4B	PATH:04360	Axon guidance	0.0129914	2.15628
Upf2	Upf2	UPF2 regulator of nonsense transcripts homolog (Yeast)	PATH:03013	RNA transport	0.47128	1.0816
Upf2	Upf2	UPF2 regulator of nonsense transcripts homolog (Yeast)	PATH:03015	mRNA surveillance pathway	0.491643	1.10599
Tyms	Tyms	Thymidylate synthase, isoform CRA_b	PATH:00670	One carbon pool by folate	0.0336775	4.14748
Tyms	Tyms	Thymidylate synthase, isoform CRA_b	PATH:00240	Pyrimidine metabolism	0.578707	0.991221
Tyms	Tyms	Thymidylate synthase, isoform CRA_b	PATH:01100	Metabolic pathways	0.823246	0.88785
Gcnt2	Gcnt2	Beta-1,6-N-acetylglucosaminyltransferase B	PATH:01100	Metabolic pathways	0.823246	0.88785
Gcnt2	Gcnt2	Beta-1,6-N-acetylglucosaminyltransferase B	PATH:00601	Glycosphingolipid biosynthesis - lacto and neolacto series	0.606618	1.09447
Cdc23	Cdc23	Cell division cycle protein 23 homolog	PATH:04110	Cell cycle	0.107128	1.66777
Cdc23	Cdc23	Cell division cycle protein 23 homolog	PATH:05166	HTLV-I infection	0.180319	1.31337
Cdc23	Cdc23	Cell division cycle protein 23 homolog	PATH:04914	Progesterone-mediated oocyte maturation	0.108824	1.83261
Cdc23	Cdc23	Cell division cycle protein 23 homolog	PATH:04120	Ubiquitin mediated proteolysis	0.164273	1.50099
Cdc23	Cdc23	Cell division cycle protein 23 homolog	PATH:04114	Oocyte meiosis	0.0631886	1.87624
Dnajc1	Dnajc1	DnaJ homolog subfamily C member 1	PATH:04141	Protein processing in endoplasmic reticulum	0.627756	0.932569
Glp2r	Glp2r	Glucagon-like peptide 2 receptor	PATH:04080	Neuroactive ligand-receptor interaction	0.187052	1.30405
Cstf2t	Cstf2t	Cleavage stimulation factor subunit 2 tau variant	PATH:03015	mRNA surveillance pathway	0.491643	1.10599
Olfr50	Olfr50	Olfactory receptor 50	PATH:04740	Olfactory transduction	1	0.344329
Map3k1	Map3k1	Mitogen-activated protein kinase kinase kinase 1	PATH:05166	HTLV-I infection	0.180319	1.31337
Map3k1	Map3k1	Mitogen-activated protein kinase kinase kinase 1	PATH:04120	Ubiquitin mediated proteolysis	0.164273	1.50099
Map3k1	Map3k1	Mitogen-activated protein kinase kinase kinase 1	PATH:04010	MAPK signaling pathway	0.00339727	1.93855
Map3k1	Map3k1	Mitogen-activated protein kinase kinase kinase 1	PATH:05161	Hepatitis B	0.187557	1.44923
Map3k1	Map3k1	Mitogen-activated protein kinase kinase kinase 1	PATH:04912	GnRH signaling pathway	0.0897393	1.82051
Map3k1	Map3k1	Mitogen-activated protein kinase kinase kinase 1	PATH:04622	RIG-I-like receptor signaling pathway	0.259324	1.54514
Map3k1	Map3k1	Mitogen-activated protein kinase kinase kinase 1	PATH:04722	Neurotrophin signaling pathway	0.409111	1.16744
Gpr156	Gpr156	Probable G-protein coupled receptor 156	PATH:04080	Neuroactive ligand-receptor interaction	0.187052	1.30405
Olfr1323	Olfr1323	Olfactory receptor	PATH:04740	Olfactory transduction	1	0.344329
Abcb9	Abcb9	ATP-binding cassette sub-family B member 9	PATH:02010	ABC transporters	0.0295968	2.85515
Abcb9	Abcb9	ATP-binding cassette sub-family B member 9	PATH:04142	Lysosome	0.991883	0.213556
Arhgap10	Arhgap10	Rho GTPase-activating protein 10	PATH:05100	Bacterial invasion of epithelial cells	0.0302185	2.32749
Rpl41	Rpl41	60S ribosomal protein L41	PATH:03010	Ribosome	0.703885	0.852836
Dusp4	Dusp4	Dual specificity protein phosphatase 4	PATH:04010	MAPK signaling pathway	0.00339727	1.93855
Ttn	Ttn	Titin	PATH:05410	Hypertrophic cardiomyopathy (HCM)	0.215341	1.56353
Ttn	Ttn	Titin	PATH:05414	Dilated cardiomyopathy	0.250658	1.47569
Negr1	Negr1	Neuronal growth regulator 1	PATH:04514	Cell adhesion molecules (CAMs)	0.529771	1.03009
Dtx3l	Dtx3l	Dtx3l protein	PATH:04330	Notch signaling pathway	0.286055	1.60821
Cblc	Cblc	Casitas B-lineage lymphoma c, isoform CRA_b	PATH:05200	Pathways in cancer	0.0256076	1.5968
Cblc	Cblc	Casitas B-lineage lymphoma c, isoform CRA_b	PATH:04660	T cell receptor signaling pathway	0.00947948	2.36643
Cblc	Cblc	Casitas B-lineage lymphoma c, isoform CRA_b	PATH:05100	Bacterial invasion of epithelial cells	0.0302185	2.32749
Cblc	Cblc	Casitas B-lineage lymphoma c, isoform CRA_b	PATH:04144	Endocytosis	0.136617	1.42628
Cblc	Cblc	Casitas B-lineage lymphoma c, isoform CRA_b	PATH:04012	ErbB signaling pathway	0.113382	1.81154
Cblc	Cblc	Casitas B-lineage lymphoma c, isoform CRA_b	PATH:04630	Jak-STAT signaling pathway	0.383501	1.17866
Cblc	Cblc	Casitas B-lineage lymphoma c, isoform CRA_b	PATH:05220	Chronic myeloid leukemia	0.144435	1.79913
Cblc	Cblc	Casitas B-lineage lymphoma c, isoform CRA_b	PATH:04120	Ubiquitin mediated proteolysis	0.164273	1.50099
Cblc	Cblc	Casitas B-lineage lymphoma c, isoform CRA_b	PATH:04910	Insulin signaling pathway	0.46362	1.10213
Cblc	Cblc	Casitas B-lineage lymphoma c, isoform CRA_b	PATH:05205	Proteoglycans in cancer	0.0254151	1.74341
Sdhd	Sdhd	Succinate dehydrogenase [ubiquinone] cytochrome b small subunit, mitochondrial	PATH:05012	Parkinson's disease	0.84052	0.686728
Sdhd	Sdhd	Succinate dehydrogenase [ubiquinone] cytochrome b small subunit, mitochondrial	PATH:00190	Oxidative phosphorylation	0.627876	0.931467
Sdhd	Sdhd	Succinate dehydrogenase [ubiquinone] cytochrome b small subunit, mitochondrial	PATH:00020	Citrate cycle (TCA cycle)	0.345598	1.64171
Sdhd	Sdhd	Succinate dehydrogenase [ubiquinone] cytochrome b small subunit, mitochondrial	PATH:05010	Alzheimer's disease	0.372701	1.17396
Sdhd	Sdhd	Succinate dehydrogenase [ubiquinone] cytochrome b small subunit, mitochondrial	PATH:04932	Non-alcoholic fatty liver disease (NAFLD)	0.370916	1.19397
Sdhd	Sdhd	Succinate dehydrogenase [ubiquinone] cytochrome b small subunit, mitochondrial	PATH:01200	Carbon metabolism	0.790746	0.722955
Sdhd	Sdhd	Succinate dehydrogenase [ubiquinone] cytochrome b small subunit, mitochondrial	PATH:01100	Metabolic pathways	0.823246	0.88785
Sdhd	Sdhd	Succinate dehydrogenase [ubiquinone] cytochrome b small subunit, mitochondrial	PATH:05016	Huntington's disease	0.85879	0.687627
Stx17	Stx17	Syntaxin-17	PATH:04130	SNARE interactions in vesicular transport	0.74375	0.750496
Hist2h2ab	Hist2h2ab	Histone H2A type 2-B	PATH:05034	Alcoholism	0.881498	0.659984
Hist2h2ab	Hist2h2ab	Histone H2A type 2-B	PATH:05322	Systemic lupus erythematosus	0.333381	1.24238
Dync1i2	Dync1i2	Cytoplasmic dynein 1 intermediate chain 2	PATH:04145	Phagosome	0.489779	1.06284
Dync1i2	Dync1i2	Cytoplasmic dynein 1 intermediate chain 2	PATH:05132	Salmonella infection	0.0796861	1.99499
Dync1i2	Dync1i2	Cytoplasmic dynein 1 intermediate chain 2	PATH:04962	Vasopressin-regulated water reabsorption	0.234218	1.79096
Ubr4	Ubr4	E3 ubiquitin-protein ligase UBR4	PATH:05203	Viral carcinogenesis	0.0132559	1.84332
Tjp2	Tjp2	Tight junction protein ZO-2	PATH:04530	Tight junction	0.00182761	2.52945
Aqp2	Aqp2	Aquaporin-2	PATH:04962	Vasopressin-regulated water reabsorption	0.234218	1.79096
Wnt2	Wnt2	Protein Wnt-2	PATH:05200	Pathways in cancer	0.0256076	1.5968
Wnt2	Wnt2	Protein Wnt-2	PATH:05166	HTLV-I infection	0.180319	1.31337
Wnt2	Wnt2	Protein Wnt-2	PATH:04310	Wnt signaling pathway	0.017184	1.99499
Wnt2	Wnt2	Protein Wnt-2	PATH:04916	Melanogenesis	0.180779	1.57604
Wnt2	Wnt2	Protein Wnt-2	PATH:04340	Hedgehog signaling pathway	0.338698	1.4593
Wnt2	Wnt2	Protein Wnt-2	PATH:04390	Hippo signaling pathway	0.0142745	2.04681
Wnt2	Wnt2	Protein Wnt-2	PATH:05217	Basal cell carcinoma	0.349228	1.43277
Wnt2	Wnt2	Protein Wnt-2	PATH:05205	Proteoglycans in cancer	0.0254151	1.74341
Nat2	Nat2	Arylamine N-acetyltransferase 2	PATH:01100	Metabolic pathways	0.823246	0.88785
Nat2	Nat2	Arylamine N-acetyltransferase 2	PATH:00232	Caffeine metabolism	0.294968	2.9186
Nat2	Nat2	Arylamine N-acetyltransferase 2	PATH:05204	Chemical carcinogenesis	0.466618	1.14206
Nat2	Nat2	Arylamine N-acetyltransferase 2	PATH:00983	Drug metabolism - other enzymes	0.452507	1.21234
Agtr1a	Agtr1a	Type-1A angiotensin II receptor	PATH:04022	cGMP-PKG signaling pathway	0.113573	1.54514
Agtr1a	Agtr1a	Type-1A angiotensin II receptor	PATH:04261	Adrenergic signaling in cardiomyocytes	0.217226	1.39165
Agtr1a	Agtr1a	Type-1A angiotensin II receptor	PATH:04020	Calcium signaling pathway	0.171365	1.41222
Agtr1a	Agtr1a	Type-1A angiotensin II receptor	PATH:04080	Neuroactive ligand-receptor interaction	0.187052	1.30405
Agtr1a	Agtr1a	Type-1A angiotensin II receptor	PATH:04614	Renin-angiotensin system	0.175551	2.62674
Agtr1a	Agtr1a	Type-1A angiotensin II receptor	PATH:04270	Vascular smooth muscle contraction	0.0571451	1.83261
Hrh1	Hrh1	Histamine H1 receptor	PATH:04750	Inflammatory mediator regulation of TRP channels	0.347355	1.25083
Hrh1	Hrh1	Histamine H1 receptor	PATH:04020	Calcium signaling pathway	0.171365	1.41222
Hrh1	Hrh1	Histamine H1 receptor	PATH:04080	Neuroactive ligand-receptor interaction	0.187052	1.30405
Rxfp1	Rxfp1	Relaxin receptor 1	PATH:04080	Neuroactive ligand-receptor interaction	0.187052	1.30405
Rasgrp3	Rasgrp3	RasGRP3	PATH:04662	B cell receptor signaling pathway	0.0722752	2.04681
Rasgrp3	Rasgrp3	RasGRP3	PATH:04014	Ras signaling pathway	0.0524839	1.61291
Rasgrp3	Rasgrp3	RasGRP3	PATH:04010	MAPK signaling pathway	0.00339727	1.93855
Rasgrp3	Rasgrp3	RasGRP3	PATH:04015	Rap1 signaling pathway	0.0035219	2.06734
Epha5	Epha5	Receptor protein-tyrosine kinase	PATH:04360	Axon guidance	0.0129914	2.15628
Spry2	Spry2	Sprouty homolog 2 (Drosophila)	PATH:04630	Jak-STAT signaling pathway	0.383501	1.17866
Spry2	Spry2	Sprouty homolog 2 (Drosophila)	PATH:05206	MicroRNAs in cancer	0.453026	1.07015
Crb1	Crb1	Crb1 protein	PATH:04390	Hippo signaling pathway	0.0142745	2.04681
Plcb4	Plcb4	Phosphoinositide phospholipase C	PATH:04728	Dopaminergic synapse	0.134135	1.57999
Plcb4	Plcb4	Phosphoinositide phospholipase C	PATH:04921	Oxytocin signaling pathway	0.0787806	1.66249
Plcb4	Plcb4	Phosphoinositide phospholipase C	PATH:04723	Retrograde endocannabinoid signaling	0.0971352	1.78516
Plcb4	Plcb4	Phosphoinositide phospholipase C	PATH:04724	Glutamatergic synapse	0.0549008	1.84692
Plcb4	Plcb4	Phosphoinositide phospholipase C	PATH:04725	Cholinergic synapse	0.0279559	2.09209
Plcb4	Plcb4	Phosphoinositide phospholipase C	PATH:00562	Inositol phosphate metabolism	0.0277891	2.58367
Plcb4	Plcb4	Phosphoinositide phospholipase C	PATH:04726	Serotonergic synapse	0.187557	1.44923
Plcb4	Plcb4	Phosphoinositide phospholipase C	PATH:04961	Endocrine and other factor-regulated calcium reabsorption	0.349228	1.43277
Plcb4	Plcb4	Phosphoinositide phospholipase C	PATH:05016	Huntington's disease	0.85879	0.687627
Plcb4	Plcb4	Phosphoinositide phospholipase C	PATH:04720	Long-term potentiation	0.121607	1.90343
Plcb4	Plcb4	Phosphoinositide phospholipase C	PATH:04022	cGMP-PKG signaling pathway	0.113573	1.54514
Plcb4	Plcb4	Phosphoinositide phospholipase C	PATH:04540	Gap junction	0.243474	1.49246
Plcb4	Plcb4	Phosphoinositide phospholipase C	PATH:04062	Chemokine signaling pathway	0.494867	1.05069
Plcb4	Plcb4	Phosphoinositide phospholipase C	PATH:04261	Adrenergic signaling in cardiomyocytes	0.217226	1.39165
Plcb4	Plcb4	Phosphoinositide phospholipase C	PATH:04020	Calcium signaling pathway	0.171365	1.41222
Plcb4	Plcb4	Phosphoinositide phospholipase C	PATH:05010	Alzheimer's disease	0.372701	1.17396
Plcb4	Plcb4	Phosphoinositide phospholipase C	PATH:04918	Thyroid hormone synthesis	0.284892	1.47985
Plcb4	Plcb4	Phosphoinositide phospholipase C	PATH:04919	Thyroid hormone signaling pathway	0.293277	1.33563
Plcb4	Plcb4	Phosphoinositide phospholipase C	PATH:04915	Estrogen signaling pathway	0.0327268	2.14427
Plcb4	Plcb4	Phosphoinositide phospholipase C	PATH:04916	Melanogenesis	0.180779	1.57604
Plcb4	Plcb4	Phosphoinositide phospholipase C	PATH:04911	Insulin secretion	0.236347	1.50962
Plcb4	Plcb4	Phosphoinositide phospholipase C	PATH:04713	Circadian entrainment	0.0792663	1.87624
Plcb4	Plcb4	Phosphoinositide phospholipase C	PATH:04912	GnRH signaling pathway	0.0897393	1.82051
Plcb4	Plcb4	Phosphoinositide phospholipase C	PATH:01100	Metabolic pathways	0.823246	0.88785
Plcb4	Plcb4	Phosphoinositide phospholipase C	PATH:04972	Pancreatic secretion	0.385823	1.22745
Plcb4	Plcb4	Phosphoinositide phospholipase C	PATH:04730	Long-term depression	0.150413	1.77482
Plcb4	Plcb4	Phosphoinositide phospholipase C	PATH:04015	Rap1 signaling pathway	0.0035219	2.06734
Plcb4	Plcb4	Phosphoinositide phospholipase C	PATH:04611	Platelet activation	0.381639	1.20309
Plcb4	Plcb4	Phosphoinositide phospholipase C	PATH:04970	Salivary secretion	0.336945	1.36454
Plcb4	Plcb4	Phosphoinositide phospholipase C	PATH:04750	Inflammatory mediator regulation of TRP channels	0.347355	1.25083
Plcb4	Plcb4	Phosphoinositide phospholipase C	PATH:04310	Wnt signaling pathway	0.017184	1.99499
Plcb4	Plcb4	Phosphoinositide phospholipase C	PATH:05146	Amoebiasis	0.037271	1.98661
Plcb4	Plcb4	Phosphoinositide phospholipase C	PATH:04971	Gastric acid secretion	0.539325	1.06489
Plcb4	Plcb4	Phosphoinositide phospholipase C	PATH:05143	African trypanosomiasis	0.137997	2.31771
Plcb4	Plcb4	Phosphoinositide phospholipase C	PATH:05142	Chagas disease (American trypanosomiasis)	0.0971352	1.78516
Plcb4	Plcb4	Phosphoinositide phospholipase C	PATH:04070	Phosphatidylinositol signaling system	0.00348967	2.9186
Plcb4	Plcb4	Phosphoinositide phospholipase C	PATH:04270	Vascular smooth muscle contraction	0.0571451	1.83261
Lpin1	Lpin1	Phosphatidate phosphatase LPIN1	PATH:00564	Glycerophospholipid metabolism	0.243474	1.49246
Lpin1	Lpin1	Phosphatidate phosphatase LPIN1	PATH:01100	Metabolic pathways	0.823246	0.88785
Lpin1	Lpin1	Phosphatidate phosphatase LPIN1	PATH:00561	Glycerolipid metabolism	0.128192	2.06019
Ppp3r2	Ppp3r2	Protein phosphatase 3, regulatory subunit B, alpha isoform (Calcineurin B, type II)	PATH:04921	Oxytocin signaling pathway	0.0787806	1.66249
Ppp3r2	Ppp3r2	Protein phosphatase 3, regulatory subunit B, alpha isoform (Calcineurin B, type II)	PATH:04724	Glutamatergic synapse	0.0549008	1.84692
Ppp3r2	Ppp3r2	Protein phosphatase 3, regulatory subunit B, alpha isoform (Calcineurin B, type II)	PATH:04114	Oocyte meiosis	0.0631886	1.87624
Ppp3r2	Ppp3r2	Protein phosphatase 3, regulatory subunit B, alpha isoform (Calcineurin B, type II)	PATH:04720	Long-term potentiation	0.121607	1.90343
Ppp3r2	Ppp3r2	Protein phosphatase 3, regulatory subunit B, alpha isoform (Calcineurin B, type II)	PATH:04660	T cell receptor signaling pathway	0.00947948	2.36643
Ppp3r2	Ppp3r2	Protein phosphatase 3, regulatory subunit B, alpha isoform (Calcineurin B, type II)	PATH:04022	cGMP-PKG signaling pathway	0.113573	1.54514
Ppp3r2	Ppp3r2	Protein phosphatase 3, regulatory subunit B, alpha isoform (Calcineurin B, type II)	PATH:05166	HTLV-I infection	0.180319	1.31337
Ppp3r2	Ppp3r2	Protein phosphatase 3, regulatory subunit B, alpha isoform (Calcineurin B, type II)	PATH:04650	Natural killer cell mediated cytotoxicity	0.313386	1.30251
Ppp3r2	Ppp3r2	Protein phosphatase 3, regulatory subunit B, alpha isoform (Calcineurin B, type II)	PATH:04210	Apoptosis	0.236347	1.50962
Ppp3r2	Ppp3r2	Protein phosphatase 3, regulatory subunit B, alpha isoform (Calcineurin B, type II)	PATH:04662	B cell receptor signaling pathway	0.0722752	2.04681
Ppp3r2	Ppp3r2	Protein phosphatase 3, regulatory subunit B, alpha isoform (Calcineurin B, type II)	PATH:04310	Wnt signaling pathway	0.017184	1.99499
Ppp3r2	Ppp3r2	Protein phosphatase 3, regulatory subunit B, alpha isoform (Calcineurin B, type II)	PATH:05014	Amyotrophic lateral sclerosis (ALS)	0.635124	0.93812
Ppp3r2	Ppp3r2	Protein phosphatase 3, regulatory subunit B, alpha isoform (Calcineurin B, type II)	PATH:05152	Tuberculosis	0.36687	1.18056
Ppp3r2	Ppp3r2	Protein phosphatase 3, regulatory subunit B, alpha isoform (Calcineurin B, type II)	PATH:05031	Amphetamine addiction	0.0154666	2.6648
Ppp3r2	Ppp3r2	Protein phosphatase 3, regulatory subunit B, alpha isoform (Calcineurin B, type II)	PATH:04370	VEGF signaling pathway	0.0284294	2.35733
Ppp3r2	Ppp3r2	Protein phosphatase 3, regulatory subunit B, alpha isoform (Calcineurin B, type II)	PATH:04360	Axon guidance	0.0129914	2.15628
Ppp3r2	Ppp3r2	Protein phosphatase 3, regulatory subunit B, alpha isoform (Calcineurin B, type II)	PATH:04020	Calcium signaling pathway	0.171365	1.41222
Ppp3r2	Ppp3r2	Protein phosphatase 3, regulatory subunit B, alpha isoform (Calcineurin B, type II)	PATH:05010	Alzheimer's disease	0.372701	1.17396
Ppp3r2	Ppp3r2	Protein phosphatase 3, regulatory subunit B, alpha isoform (Calcineurin B, type II)	PATH:04010	MAPK signaling pathway	0.00339727	1.93855
Ppp3r2	Ppp3r2	Protein phosphatase 3, regulatory subunit B, alpha isoform (Calcineurin B, type II)	PATH:04380	Osteoclast differentiation	0.0527148	1.86147
Nox3	Nox3	NADPH oxidase 3	PATH:04066	HIF-1 signaling pathway	0.241202	1.43277
Nox3	Nox3	NADPH oxidase 3	PATH:04145	Phagosome	0.489779	1.06284
Nox3	Nox3	NADPH oxidase 3	PATH:04670	Leukocyte transendothelial migration	0.0866224	1.75116
Nox3	Nox3	NADPH oxidase 3	PATH:04380	Osteoclast differentiation	0.0527148	1.86147
Wt1	Wt1	Wilms tumor protein homolog	PATH:05202	Transcriptional misregulation in cancer	0.00821185	2.05443
Myo10	Myo10	Unconventional myosin-X	PATH:04666	Fc gamma R-mediated phagocytosis	0.0497844	2.08945
Igf1r	Igf1r	Tyrosine-protein kinase receptor	PATH:04914	Progesterone-mediated oocyte maturation	0.108824	1.83261
Igf1r	Igf1r	Tyrosine-protein kinase receptor	PATH:05218	Melanoma	0.132799	1.84981
Igf1r	Igf1r	Tyrosine-protein kinase receptor	PATH:04913	Ovarian steroidogenesis	0.654187	0.905771
Igf1r	Igf1r	Tyrosine-protein kinase receptor	PATH:05215	Prostate cancer	0.441171	1.18056
Igf1r	Igf1r	Tyrosine-protein kinase receptor	PATH:04730	Long-term depression	0.150413	1.77482
Igf1r	Igf1r	Tyrosine-protein kinase receptor	PATH:04510	Focal adhesion	0.053775	1.64171
Igf1r	Igf1r	Tyrosine-protein kinase receptor	PATH:04114	Oocyte meiosis	0.0631886	1.87624
Igf1r	Igf1r	Tyrosine-protein kinase receptor	PATH:04015	Rap1 signaling pathway	0.0035219	2.06734
Igf1r	Igf1r	Tyrosine-protein kinase receptor	PATH:05214	Glioma	0.234251	1.61645
Igf1r	Igf1r	Tyrosine-protein kinase receptor	PATH:05205	Proteoglycans in cancer	0.0254151	1.74341
Igf1r	Igf1r	Tyrosine-protein kinase receptor	PATH:05200	Pathways in cancer	0.0256076	1.5968
Igf1r	Igf1r	Tyrosine-protein kinase receptor	PATH:04066	HIF-1 signaling pathway	0.241202	1.43277
Igf1r	Igf1r	Tyrosine-protein kinase receptor	PATH:04144	Endocytosis	0.136617	1.42628
Igf1r	Igf1r	Tyrosine-protein kinase receptor	PATH:05202	Transcriptional misregulation in cancer	0.00821185	2.05443
Igf1r	Igf1r	Tyrosine-protein kinase receptor	PATH:04068	FoxO signaling pathway	0.409111	1.16744
Igf1r	Igf1r	Tyrosine-protein kinase receptor	PATH:04520	Adherens junction	0.00138713	3.32967
Igf1r	Igf1r	Tyrosine-protein kinase receptor	PATH:04014	Ras signaling pathway	0.0524839	1.61291
Igf1r	Igf1r	Tyrosine-protein kinase receptor	PATH:04151	PI3K-Akt signaling pathway	0.688585	0.900595
Prkce	Prkce	Protein kinase C epsilon type	PATH:04022	cGMP-PKG signaling pathway	0.113573	1.54514
Prkce	Prkce	Protein kinase C epsilon type	PATH:04750	Inflammatory mediator regulation of TRP channels	0.347355	1.25083
Prkce	Prkce	Protein kinase C epsilon type	PATH:04530	Tight junction	0.00182761	2.52945
Prkce	Prkce	Protein kinase C epsilon type	PATH:04270	Vascular smooth muscle contraction	0.0571451	1.83261
Prkce	Prkce	Protein kinase C epsilon type	PATH:04664	Fc epsilon RI signaling pathway	0.208475	1.58237
Prkce	Prkce	Protein kinase C epsilon type	PATH:05206	MicroRNAs in cancer	0.453026	1.07015
Prkce	Prkce	Protein kinase C epsilon type	PATH:04930	Type II diabetes mellitus	0.121555	2.10139
Prkce	Prkce	Protein kinase C epsilon type	PATH:04666	Fc gamma R-mediated phagocytosis	0.0497844	2.08945
Setdb2	Setdb2	Histone-lysine N-methyltransferase SETDB2	PATH:00310	Lysine degradation	0.573052	1.05069
Eif2b2	Eif2b2	Translation initiation factor eIF-2B subunit beta	PATH:03013	RNA transport	0.47128	1.0816
Cnot6l	Cnot6l	CCR4-NOT transcription complex subunit 6-like	PATH:03018	RNA degradation	0.601125	0.972865
Cald1	Cald1	Protein Cald1	PATH:04270	Vascular smooth muscle contraction	0.0571451	1.83261
Anapc1	Anapc1	Anaphase-promoting complex subunit 1	PATH:04110	Cell cycle	0.107128	1.66777
Anapc1	Anapc1	Anaphase-promoting complex subunit 1	PATH:05166	HTLV-I infection	0.180319	1.31337
Anapc1	Anapc1	Anaphase-promoting complex subunit 1	PATH:04914	Progesterone-mediated oocyte maturation	0.108824	1.83261
Anapc1	Anapc1	Anaphase-promoting complex subunit 1	PATH:04120	Ubiquitin mediated proteolysis	0.164273	1.50099
Anapc1	Anapc1	Anaphase-promoting complex subunit 1	PATH:04114	Oocyte meiosis	0.0631886	1.87624
Mitf	Mitf	Microphthalmia-associated transcription factor B isoform	PATH:05200	Pathways in cancer	0.0256076	1.5968
Mitf	Mitf	Microphthalmia-associated transcription factor B isoform	PATH:04916	Melanogenesis	0.180779	1.57604
Mitf	Mitf	Microphthalmia-associated transcription factor B isoform	PATH:05218	Melanoma	0.132799	1.84981
Mitf	Mitf	Microphthalmia-associated transcription factor B isoform	PATH:04380	Osteoclast differentiation	0.0527148	1.86147
Ppa1	Ppa1	Putative uncharacterized protein	PATH:00190	Oxidative phosphorylation	0.627876	0.931467
Acot12	Acot12	Acyl-CoA thioesterase 12	PATH:00620	Pyruvate metabolism	0.819634	0.596985
Olfr736	Olfr736	Olfactory receptor	PATH:04740	Olfactory transduction	1	0.344329
Psd3	Psd3	PH and SEC7 domain-containing protein 3	PATH:04144	Endocytosis	0.136617	1.42628
Eda2r	Eda2r	Eda2r protein	PATH:04060	Cytokine-cytokine receptor interaction	0.681337	0.895478
Tk2	Tk2	Thymidine kinase 2, mitochondrial, isoform CRA_b	PATH:00240	Pyrimidine metabolism	0.578707	0.991221
Tk2	Tk2	Thymidine kinase 2, mitochondrial, isoform CRA_b	PATH:01100	Metabolic pathways	0.823246	0.88785
Tk2	Tk2	Thymidine kinase 2, mitochondrial, isoform CRA_b	PATH:00983	Drug metabolism - other enzymes	0.452507	1.21234
Gabrb2	Gabrb2	Gamma-aminobutyric acid receptor subunit beta-2	PATH:04727	GABAergic synapse	0.250658	1.47569
Gabrb2	Gabrb2	Gamma-aminobutyric acid receptor subunit beta-2	PATH:05033	Nicotine addiction	0.453579	1.31337
Gabrb2	Gabrb2	Gamma-aminobutyric acid receptor subunit beta-2	PATH:05032	Morphine addiction	0.00249349	2.85515
Gabrb2	Gabrb2	Gamma-aminobutyric acid receptor subunit beta-2	PATH:04723	Retrograde endocannabinoid signaling	0.0971352	1.78516
Gabrb2	Gabrb2	Gamma-aminobutyric acid receptor subunit beta-2	PATH:04080	Neuroactive ligand-receptor interaction	0.187052	1.30405
Gabrb2	Gabrb2	Gamma-aminobutyric acid receptor subunit beta-2	PATH:04726	Serotonergic synapse	0.187557	1.44923
Ahcyl2	Ahcyl2	Ahcyl2 protein	PATH:00270	Cysteine and methionine metabolism	0.812454	0.610869
Ahcyl2	Ahcyl2	Ahcyl2 protein	PATH:00450	Selenocompound metabolism	0.688605	0.875579
Ahcyl2	Ahcyl2	Ahcyl2 protein	PATH:01100	Metabolic pathways	0.823246	0.88785
Tnfsf13b	Tnfsf13b	Tumor necrosis factor (Ligand) superfamily, member 13b, isoform CRA_a	PATH:04672	Intestinal immune network for IgA production	0.527601	1.14206
Tnfsf13b	Tnfsf13b	Tumor necrosis factor (Ligand) superfamily, member 13b, isoform CRA_a	PATH:05323	Rheumatoid arthritis	0.398048	1.25083
Tnfsf13b	Tnfsf13b	Tumor necrosis factor (Ligand) superfamily, member 13b, isoform CRA_a	PATH:04064	NF-kappa B signaling pathway	0.8993	0.525347
Tnfsf13b	Tnfsf13b	Tumor necrosis factor (Ligand) superfamily, member 13b, isoform CRA_a	PATH:04060	Cytokine-cytokine receptor interaction	0.681337	0.895478
Eci1	Eci1	Enoyl-CoA delta isomerase 1, mitochondrial	PATH:00071	Fatty acid degradation	0.55073	1.09447
Mir423	Mir423	microRNA 423	PATH:05206	MicroRNAs in cancer	0.453026	1.07015
Six1	Six1	Putative uncharacterized protein	PATH:05202	Transcriptional misregulation in cancer	0.00821185	2.05443
Prkd1	Prkd1	Serine/threonine-protein kinase D1	PATH:04015	Rap1 signaling pathway	0.0035219	2.06734
Nploc4	Nploc4	Nuclear protein localization protein 4 homolog	PATH:04141	Protein processing in endoplasmic reticulum	0.627756	0.932569
Mir28a	Mir28a	microRNA 28a	PATH:05206	MicroRNAs in cancer	0.453026	1.07015
St6galnac5	St6galnac5	Alpha-N-acetylgalactosaminide alpha-2,6-sialyltransferase 5	PATH:00604	Glycosphingolipid biosynthesis - ganglio series	0.441642	1.75116
St6galnac5	St6galnac5	Alpha-N-acetylgalactosaminide alpha-2,6-sialyltransferase 5	PATH:01100	Metabolic pathways	0.823246	0.88785
S1pr3	S1pr3	Sphingosine 1-phosphate receptor 3	PATH:04080	Neuroactive ligand-receptor interaction	0.187052	1.30405
Slk	Slk	Slk protein	PATH:04114	Oocyte meiosis	0.0631886	1.87624
Map3k7	Map3k7	Mitogen-activated protein kinase kinase kinase 7	PATH:04668	TNF signaling pathway	0.401076	1.20492
Map3k7	Map3k7	Mitogen-activated protein kinase kinase kinase 7	PATH:04620	Toll-like receptor signaling pathway	0.340049	1.30036
Map3k7	Map3k7	Mitogen-activated protein kinase kinase kinase 7	PATH:04621	NOD-like receptor signaling pathway	0.681286	0.861225
Map3k7	Map3k7	Mitogen-activated protein kinase kinase kinase 7	PATH:04622	RIG-I-like receptor signaling pathway	0.259324	1.54514
Map3k7	Map3k7	Mitogen-activated protein kinase kinase kinase 7	PATH:05145	Toxoplasmosis	0.231668	1.4036
Map3k7	Map3k7	Mitogen-activated protein kinase kinase kinase 7	PATH:04660	T cell receptor signaling pathway	0.00947948	2.36643
Map3k7	Map3k7	Mitogen-activated protein kinase kinase kinase 7	PATH:05169	Epstein-Barr virus infection	0.69887	0.871429
Map3k7	Map3k7	Mitogen-activated protein kinase kinase kinase 7	PATH:04310	Wnt signaling pathway	0.017184	1.99499
Map3k7	Map3k7	Mitogen-activated protein kinase kinase kinase 7	PATH:05168	Herpes simplex infection	0.884106	0.656684
Map3k7	Map3k7	Mitogen-activated protein kinase kinase kinase 7	PATH:04520	Adherens junction	0.00138713	3.32967
Map3k7	Map3k7	Mitogen-activated protein kinase kinase kinase 7	PATH:05162	Measles	0.422815	1.1504
Map3k7	Map3k7	Mitogen-activated protein kinase kinase kinase 7	PATH:05140	Leishmaniasis	0.100639	2.02057
Map3k7	Map3k7	Mitogen-activated protein kinase kinase kinase 7	PATH:04064	NF-kappa B signaling pathway	0.8993	0.525347
Map3k7	Map3k7	Mitogen-activated protein kinase kinase kinase 7	PATH:04010	MAPK signaling pathway	0.00339727	1.93855
Map3k7	Map3k7	Mitogen-activated protein kinase kinase kinase 7	PATH:04380	Osteoclast differentiation	0.0527148	1.86147
Reck	Reck	Reck protein	PATH:05206	MicroRNAs in cancer	0.453026	1.07015
Pla2g10	Pla2g10	Phospholipase A(2)	PATH:00564	Glycerophospholipid metabolism	0.243474	1.49246
Pla2g10	Pla2g10	Phospholipase A(2)	PATH:04724	Glutamatergic synapse	0.0549008	1.84692
Pla2g10	Pla2g10	Phospholipase A(2)	PATH:04912	GnRH signaling pathway	0.0897393	1.82051
Pla2g10	Pla2g10	Phospholipase A(2)	PATH:04726	Serotonergic synapse	0.187557	1.44923
Pla2g10	Pla2g10	Phospholipase A(2)	PATH:01100	Metabolic pathways	0.823246	0.88785
Pla2g10	Pla2g10	Phospholipase A(2)	PATH:04972	Pancreatic secretion	0.385823	1.22745
Pla2g10	Pla2g10	Phospholipase A(2)	PATH:04730	Long-term depression	0.150413	1.77482
Pla2g10	Pla2g10	Phospholipase A(2)	PATH:04664	Fc epsilon RI signaling pathway	0.208475	1.58237
Pla2g10	Pla2g10	Phospholipase A(2)	PATH:04975	Fat digestion and absorption	0.213976	1.87624
Pla2g10	Pla2g10	Phospholipase A(2)	PATH:00565	Ether lipid metabolism	0.427469	1.38249
Pla2g10	Pla2g10	Phospholipase A(2)	PATH:05145	Toxoplasmosis	0.231668	1.4036
Pla2g10	Pla2g10	Phospholipase A(2)	PATH:04014	Ras signaling pathway	0.0524839	1.61291
Pla2g10	Pla2g10	Phospholipase A(2)	PATH:04370	VEGF signaling pathway	0.0284294	2.35733
Pla2g10	Pla2g10	Phospholipase A(2)	PATH:00592	alpha-Linolenic acid metabolism	0.246049	2.10139
Pla2g10	Pla2g10	Phospholipase A(2)	PATH:00591	Linoleic acid metabolism	0.59456	1.01028
Pla2g10	Pla2g10	Phospholipase A(2)	PATH:04010	MAPK signaling pathway	0.00339727	1.93855
Pla2g10	Pla2g10	Phospholipase A(2)	PATH:00590	Arachidonic acid metabolism	0.978265	0.268034
Pla2g10	Pla2g10	Phospholipase A(2)	PATH:04270	Vascular smooth muscle contraction	0.0571451	1.83261
Sgk1	Sgk1	Serine/threonine-protein kinase Sgk1	PATH:04068	FoxO signaling pathway	0.409111	1.16744
Sgk1	Sgk1	Serine/threonine-protein kinase Sgk1	PATH:04960	Aldosterone-regulated sodium reabsorption	0.234218	1.79096
Sgk1	Sgk1	Serine/threonine-protein kinase Sgk1	PATH:04151	PI3K-Akt signaling pathway	0.688585	0.900595
Nup37	Nup37	Nucleoporin Nup37	PATH:03013	RNA transport	0.47128	1.0816
P4ha3	P4ha3	Prolyl 4-hydroxylase subunit alpha-3	PATH:00330	Arginine and proline metabolism	0.899641	0.44521
P4ha3	P4ha3	Prolyl 4-hydroxylase subunit alpha-3	PATH:01100	Metabolic pathways	0.823246	0.88785
Dnajc6	Dnajc6	Putative tyrosine-protein phosphatase auxilin	PATH:04144	Endocytosis	0.136617	1.42628
Col9a1	Col9a1	Procollagen, type IX, alpha 1	PATH:04974	Protein digestion and absorption	0.858655	0.590278
Ace	Ace	Angiotensin-converting enzyme	PATH:05410	Hypertrophic cardiomyopathy (HCM)	0.215341	1.56353
Ace	Ace	Angiotensin-converting enzyme	PATH:05142	Chagas disease (American trypanosomiasis)	0.0971352	1.78516
Ace	Ace	Angiotensin-converting enzyme	PATH:04614	Renin-angiotensin system	0.175551	2.62674
Fgf9	Fgf9	Fibroblast growth factor 9	PATH:05200	Pathways in cancer	0.0256076	1.5968
Fgf9	Fgf9	Fibroblast growth factor 9	PATH:04014	Ras signaling pathway	0.0524839	1.61291
Fgf9	Fgf9	Fibroblast growth factor 9	PATH:04151	PI3K-Akt signaling pathway	0.688585	0.900595
Fgf9	Fgf9	Fibroblast growth factor 9	PATH:04010	MAPK signaling pathway	0.00339727	1.93855
Fgf9	Fgf9	Fibroblast growth factor 9	PATH:05218	Melanoma	0.132799	1.84981
Fgf9	Fgf9	Fibroblast growth factor 9	PATH:04015	Rap1 signaling pathway	0.0035219	2.06734
Fgf9	Fgf9	Fibroblast growth factor 9	PATH:05205	Proteoglycans in cancer	0.0254151	1.74341
Fgf9	Fgf9	Fibroblast growth factor 9	PATH:04810	Regulation of actin cytoskeleton	0.216904	1.31337
Mphosph6	Mphosph6	M-phase phosphoprotein 6	PATH:03018	RNA degradation	0.601125	0.972865
Dgkq	Dgkq	Diacylglycerol kinase theta	PATH:00564	Glycerophospholipid metabolism	0.243474	1.49246
Dgkq	Dgkq	Diacylglycerol kinase theta	PATH:04070	Phosphatidylinositol signaling system	0.00348967	2.9186
Dgkq	Dgkq	Diacylglycerol kinase theta	PATH:01100	Metabolic pathways	0.823246	0.88785
Dgkq	Dgkq	Diacylglycerol kinase theta	PATH:00561	Glycerolipid metabolism	0.128192	2.06019
Smad1	Smad1	Mothers against decapentaplegic homolog 1	PATH:05202	Transcriptional misregulation in cancer	0.00821185	2.05443
Smad1	Smad1	Mothers against decapentaplegic homolog 1	PATH:04350	TGF-beta signaling pathway	0.250658	1.47569
Smad1	Smad1	Mothers against decapentaplegic homolog 1	PATH:04390	Hippo signaling pathway	0.0142745	2.04681
Eif2ak4	Eif2ak4	Eukaryotic translation initiation factor 2-alpha kinase 4	PATH:05169	Epstein-Barr virus infection	0.69887	0.871429
Eif2ak4	Eif2ak4	Eukaryotic translation initiation factor 2-alpha kinase 4	PATH:05168	Herpes simplex infection	0.884106	0.656684
Eif2ak4	Eif2ak4	Eukaryotic translation initiation factor 2-alpha kinase 4	PATH:05162	Measles	0.422815	1.1504
Eif2ak4	Eif2ak4	Eukaryotic translation initiation factor 2-alpha kinase 4	PATH:04141	Protein processing in endoplasmic reticulum	0.627756	0.932569
Eif2ak4	Eif2ak4	Eukaryotic translation initiation factor 2-alpha kinase 4	PATH:05164	Influenza A	0.47128	1.0816
Eif2ak4	Eif2ak4	Eukaryotic translation initiation factor 2-alpha kinase 4	PATH:05160	Hepatitis C	0.89904	0.575198
Meis1	Meis1	Homeobox protein Meis1	PATH:05202	Transcriptional misregulation in cancer	0.00821185	2.05443
Sh3glb1	Sh3glb1	Endophilin B1 testis variant	PATH:04144	Endocytosis	0.136617	1.42628
Suv39h2	Suv39h2	Histone-lysine N-methyltransferase SUV39H2	PATH:00310	Lysine degradation	0.573052	1.05069
Utp18	Utp18	Putative uncharacterized protein	PATH:03008	Ribosome biogenesis in eukaryotes	0.201683	1.60167
Abcg3	Abcg3	ATP-binding cassette sub-family G member 3	PATH:02010	ABC transporters	0.0295968	2.85515
Aldh1l2	Aldh1l2	Mitochondrial 10-formyltetrahydrofolate dehydrogenase	PATH:00670	One carbon pool by folate	0.0336775	4.14748
Nme4	Nme4	Nucleoside diphosphate kinase	PATH:00240	Pyrimidine metabolism	0.578707	0.991221
Nme4	Nme4	Nucleoside diphosphate kinase	PATH:00230	Purine metabolism	0.137316	1.48403
Nme4	Nme4	Nucleoside diphosphate kinase	PATH:01100	Metabolic pathways	0.823246	0.88785
Msr1	Msr1	Macrophage scavenger receptor types I and II	PATH:04145	Phagosome	0.489779	1.06284
Gmpr	Gmpr	GMP reductase 1	PATH:00230	Purine metabolism	0.137316	1.48403
Idi1	Idi1	Isopentenyl-diphosphate delta isomerase	PATH:00900	Terpenoid backbone biosynthesis	0.203445	2.38794
Idi1	Idi1	Isopentenyl-diphosphate delta isomerase	PATH:01100	Metabolic pathways	0.823246	0.88785
Pde11a	Pde11a	Dual 3',5'-cyclic-AMP and -GMP phosphodiesterase 11A	PATH:00230	Purine metabolism	0.137316	1.48403
Pde11a	Pde11a	Dual 3',5'-cyclic-AMP and -GMP phosphodiesterase 11A	PATH:05032	Morphine addiction	0.00249349	2.85515
Tnfsf4	Tnfsf4	Tumor necrosis factor (Ligand) superfamily member 4	PATH:04060	Cytokine-cytokine receptor interaction	0.681337	0.895478
Pik3cg	Pik3cg	Phosphoinositide-3-kinase gamma polypeptide	PATH:04921	Oxytocin signaling pathway	0.0787806	1.66249
Pik3cg	Pik3cg	Phosphoinositide-3-kinase gamma polypeptide	PATH:05218	Melanoma	0.132799	1.84981
Pik3cg	Pik3cg	Phosphoinositide-3-kinase gamma polypeptide	PATH:04725	Cholinergic synapse	0.0279559	2.09209
Pik3cg	Pik3cg	Phosphoinositide-3-kinase gamma polypeptide	PATH:00562	Inositol phosphate metabolism	0.0277891	2.58367
Pik3cg	Pik3cg	Phosphoinositide-3-kinase gamma polypeptide	PATH:05215	Prostate cancer	0.441171	1.18056
Pik3cg	Pik3cg	Phosphoinositide-3-kinase gamma polypeptide	PATH:05214	Glioma	0.234251	1.61645
Pik3cg	Pik3cg	Phosphoinositide-3-kinase gamma polypeptide	PATH:04722	Neurotrophin signaling pathway	0.409111	1.16744
Pik3cg	Pik3cg	Phosphoinositide-3-kinase gamma polypeptide	PATH:05211	Renal cell carcinoma	0.138563	1.82412
Pik3cg	Pik3cg	Phosphoinositide-3-kinase gamma polypeptide	PATH:05210	Colorectal cancer	0.0389141	2.38794
Pik3cg	Pik3cg	Phosphoinositide-3-kinase gamma polypeptide	PATH:05213	Endometrial cancer	0.317615	1.51542
Pik3cg	Pik3cg	Phosphoinositide-3-kinase gamma polypeptide	PATH:05212	Pancreatic cancer	0.127146	1.87624
Pik3cg	Pik3cg	Phosphoinositide-3-kinase gamma polypeptide	PATH:04960	Aldosterone-regulated sodium reabsorption	0.234218	1.79096
Pik3cg	Pik3cg	Phosphoinositide-3-kinase gamma polypeptide	PATH:04919	Thyroid hormone signaling pathway	0.293277	1.33563
Pik3cg	Pik3cg	Phosphoinositide-3-kinase gamma polypeptide	PATH:04914	Progesterone-mediated oocyte maturation	0.108824	1.83261
Pik3cg	Pik3cg	Phosphoinositide-3-kinase gamma polypeptide	PATH:04915	Estrogen signaling pathway	0.0327268	2.14427
Pik3cg	Pik3cg	Phosphoinositide-3-kinase gamma polypeptide	PATH:04917	Prolactin signaling pathway	0.310812	1.41986
Pik3cg	Pik3cg	Phosphoinositide-3-kinase gamma polypeptide	PATH:04910	Insulin signaling pathway	0.46362	1.10213
Pik3cg	Pik3cg	Phosphoinositide-3-kinase gamma polypeptide	PATH:04510	Focal adhesion	0.053775	1.64171
Pik3cg	Pik3cg	Phosphoinositide-3-kinase gamma polypeptide	PATH:05203	Viral carcinogenesis	0.0132559	1.84332
Pik3cg	Pik3cg	Phosphoinositide-3-kinase gamma polypeptide	PATH:05205	Proteoglycans in cancer	0.0254151	1.74341
Pik3cg	Pik3cg	Phosphoinositide-3-kinase gamma polypeptide	PATH:05200	Pathways in cancer	0.0256076	1.5968
Pik3cg	Pik3cg	Phosphoinositide-3-kinase gamma polypeptide	PATH:05166	HTLV-I infection	0.180319	1.31337
Pik3cg	Pik3cg	Phosphoinositide-3-kinase gamma polypeptide	PATH:05169	Epstein-Barr virus infection	0.69887	0.871429
Pik3cg	Pik3cg	Phosphoinositide-3-kinase gamma polypeptide	PATH:04750	Inflammatory mediator regulation of TRP channels	0.347355	1.25083
Pik3cg	Pik3cg	Phosphoinositide-3-kinase gamma polypeptide	PATH:04630	Jak-STAT signaling pathway	0.383501	1.17866
Pik3cg	Pik3cg	Phosphoinositide-3-kinase gamma polypeptide	PATH:04150	mTOR signaling pathway	0.100639	2.02057
Pik3cg	Pik3cg	Phosphoinositide-3-kinase gamma polypeptide	PATH:05162	Measles	0.422815	1.1504
Pik3cg	Pik3cg	Phosphoinositide-3-kinase gamma polypeptide	PATH:04151	PI3K-Akt signaling pathway	0.688585	0.900595
Pik3cg	Pik3cg	Phosphoinositide-3-kinase gamma polypeptide	PATH:05164	Influenza A	0.47128	1.0816
Pik3cg	Pik3cg	Phosphoinositide-3-kinase gamma polypeptide	PATH:04670	Leukocyte transendothelial migration	0.0866224	1.75116
Pik3cg	Pik3cg	Phosphoinositide-3-kinase gamma polypeptide	PATH:04070	Phosphatidylinositol signaling system	0.00348967	2.9186
Pik3cg	Pik3cg	Phosphoinositide-3-kinase gamma polypeptide	PATH:05161	Hepatitis B	0.187557	1.44923
Pik3cg	Pik3cg	Phosphoinositide-3-kinase gamma polypeptide	PATH:05160	Hepatitis C	0.89904	0.575198
Pik3cg	Pik3cg	Phosphoinositide-3-kinase gamma polypeptide	PATH:04668	TNF signaling pathway	0.401076	1.20492
Pik3cg	Pik3cg	Phosphoinositide-3-kinase gamma polypeptide	PATH:04664	Fc epsilon RI signaling pathway	0.208475	1.58237
Pik3cg	Pik3cg	Phosphoinositide-3-kinase gamma polypeptide	PATH:04620	Toll-like receptor signaling pathway	0.340049	1.30036
Pik3cg	Pik3cg	Phosphoinositide-3-kinase gamma polypeptide	PATH:04666	Fc gamma R-mediated phagocytosis	0.0497844	2.08945
Pik3cg	Pik3cg	Phosphoinositide-3-kinase gamma polypeptide	PATH:04660	T cell receptor signaling pathway	0.00947948	2.36643
Pik3cg	Pik3cg	Phosphoinositide-3-kinase gamma polypeptide	PATH:04066	HIF-1 signaling pathway	0.241202	1.43277
Pik3cg	Pik3cg	Phosphoinositide-3-kinase gamma polypeptide	PATH:04022	cGMP-PKG signaling pathway	0.113573	1.54514
Pik3cg	Pik3cg	Phosphoinositide-3-kinase gamma polypeptide	PATH:04662	B cell receptor signaling pathway	0.0722752	2.04681
Pik3cg	Pik3cg	Phosphoinositide-3-kinase gamma polypeptide	PATH:04068	FoxO signaling pathway	0.409111	1.16744
Pik3cg	Pik3cg	Phosphoinositide-3-kinase gamma polypeptide	PATH:04062	Chemokine signaling pathway	0.494867	1.05069
Pik3cg	Pik3cg	Phosphoinositide-3-kinase gamma polypeptide	PATH:04261	Adrenergic signaling in cardiomyocytes	0.217226	1.39165
Pik3cg	Pik3cg	Phosphoinositide-3-kinase gamma polypeptide	PATH:04380	Osteoclast differentiation	0.0527148	1.86147
Pik3cg	Pik3cg	Phosphoinositide-3-kinase gamma polypeptide	PATH:04932	Non-alcoholic fatty liver disease (NAFLD)	0.370916	1.19397
Pik3cg	Pik3cg	Phosphoinositide-3-kinase gamma polypeptide	PATH:04015	Rap1 signaling pathway	0.0035219	2.06734
Pik3cg	Pik3cg	Phosphoinositide-3-kinase gamma polypeptide	PATH:04973	Carbohydrate digestion and absorption	0.0271962	2.9186
Pik3cg	Pik3cg	Phosphoinositide-3-kinase gamma polypeptide	PATH:04930	Type II diabetes mellitus	0.121555	2.10139
Pik3cg	Pik3cg	Phosphoinositide-3-kinase gamma polypeptide	PATH:04611	Platelet activation	0.381639	1.20309
Pik3cg	Pik3cg	Phosphoinositide-3-kinase gamma polypeptide	PATH:04810	Regulation of actin cytoskeleton	0.216904	1.31337
Pik3cg	Pik3cg	Phosphoinositide-3-kinase gamma polypeptide	PATH:05222	Small cell lung cancer	0.250658	1.47569
Pik3cg	Pik3cg	Phosphoinositide-3-kinase gamma polypeptide	PATH:05145	Toxoplasmosis	0.231668	1.4036
Pik3cg	Pik3cg	Phosphoinositide-3-kinase gamma polypeptide	PATH:05221	Acute myeloid leukemia	0.170945	1.84332
Pik3cg	Pik3cg	Phosphoinositide-3-kinase gamma polypeptide	PATH:05100	Bacterial invasion of epithelial cells	0.0302185	2.32749
Pik3cg	Pik3cg	Phosphoinositide-3-kinase gamma polypeptide	PATH:04650	Natural killer cell mediated cytotoxicity	0.313386	1.30251
Pik3cg	Pik3cg	Phosphoinositide-3-kinase gamma polypeptide	PATH:04210	Apoptosis	0.236347	1.50962
Pik3cg	Pik3cg	Phosphoinositide-3-kinase gamma polypeptide	PATH:04012	ErbB signaling pathway	0.113382	1.81154
Pik3cg	Pik3cg	Phosphoinositide-3-kinase gamma polypeptide	PATH:05223	Non-small cell lung cancer	0.163497	1.87624
Pik3cg	Pik3cg	Phosphoinositide-3-kinase gamma polypeptide	PATH:05146	Amoebiasis	0.037271	1.98661
Pik3cg	Pik3cg	Phosphoinositide-3-kinase gamma polypeptide	PATH:04014	Ras signaling pathway	0.0524839	1.61291
Pik3cg	Pik3cg	Phosphoinositide-3-kinase gamma polypeptide	PATH:04370	VEGF signaling pathway	0.0284294	2.35733
Pik3cg	Pik3cg	Phosphoinositide-3-kinase gamma polypeptide	PATH:05220	Chronic myeloid leukemia	0.144435	1.79913
Pik3cg	Pik3cg	Phosphoinositide-3-kinase gamma polypeptide	PATH:05142	Chagas disease (American trypanosomiasis)	0.0971352	1.78516
Sh3gl2	Sh3gl2	Endophilin-A1	PATH:04144	Endocytosis	0.136617	1.42628
Cdh5	Cdh5	Cadherin-5	PATH:04670	Leukocyte transendothelial migration	0.0866224	1.75116
Cdh5	Cdh5	Cadherin-5	PATH:04514	Cell adhesion molecules (CAMs)	0.529771	1.03009
Gzmb	Gzmb	Granzyme B(G,H)	PATH:05332	Graft-versus-host disease	0.877967	0.486433
Gzmb	Gzmb	Granzyme B(G,H)	PATH:05320	Autoimmune thyroid disease	0.926624	0.39205
Gzmb	Gzmb	Granzyme B(G,H)	PATH:04650	Natural killer cell mediated cytotoxicity	0.313386	1.30251
Gzmb	Gzmb	Granzyme B(G,H)	PATH:05202	Transcriptional misregulation in cancer	0.00821185	2.05443
Gzmb	Gzmb	Granzyme B(G,H)	PATH:05330	Allograft rejection	0.59456	1.01028
Gzmb	Gzmb	Granzyme B(G,H)	PATH:04940	Type I diabetes mellitus	0.663418	0.890419
Gm9843	Gm9843	predicted gene 9843	PATH:03010	Ribosome	0.703885	0.852836
Klc1	Klc1	Kinesin light chain 1T	PATH:05132	Salmonella infection	0.0796861	1.99499
Rapgef5	Rapgef5	Putative uncharacterized protein	PATH:04014	Ras signaling pathway	0.0524839	1.61291
Rapgef5	Rapgef5	Putative uncharacterized protein	PATH:04015	Rap1 signaling pathway	0.0035219	2.06734
Zak	Zak	Mitogen-activated protein kinase kinase kinase MLT	PATH:04530	Tight junction	0.00182761	2.52945
Zak	Zak	Mitogen-activated protein kinase kinase kinase MLT	PATH:04010	MAPK signaling pathway	0.00339727	1.93855
Dock1	Dock1	Dedicator of cytokinesis protein 1	PATH:05100	Bacterial invasion of epithelial cells	0.0302185	2.32749
Dock1	Dock1	Dedicator of cytokinesis protein 1	PATH:04510	Focal adhesion	0.053775	1.64171
Dock1	Dock1	Dedicator of cytokinesis protein 1	PATH:04810	Regulation of actin cytoskeleton	0.216904	1.31337
Rptor	Rptor	Regulatory-associated protein of mTOR	PATH:04150	mTOR signaling pathway	0.100639	2.02057
Rptor	Rptor	Regulatory-associated protein of mTOR	PATH:04151	PI3K-Akt signaling pathway	0.688585	0.900595
Rptor	Rptor	Regulatory-associated protein of mTOR	PATH:04910	Insulin signaling pathway	0.46362	1.10213
Rptor	Rptor	Regulatory-associated protein of mTOR	PATH:05206	MicroRNAs in cancer	0.453026	1.07015
Tusc3	Tusc3	Putative uncharacterized protein	PATH:04141	Protein processing in endoplasmic reticulum	0.627756	0.932569
Tusc3	Tusc3	Putative uncharacterized protein	PATH:01100	Metabolic pathways	0.823246	0.88785
Tusc3	Tusc3	Putative uncharacterized protein	PATH:00510	N-Glycan biosynthesis	0.573052	1.05069
Robo1	Robo1	Roundabout homolog 1	PATH:04360	Axon guidance	0.0129914	2.15628
Hpgd	Hpgd	15-hydroxyprostaglandin dehydrogenase [NAD(+)]	PATH:05202	Transcriptional misregulation in cancer	0.00821185	2.05443
Sis	Sis	Sucrase-isomaltase	PATH:00052	Galactose metabolism	0.120714	2.46257
Sis	Sis	Sucrase-isomaltase	PATH:01100	Metabolic pathways	0.823246	0.88785
Sis	Sis	Sucrase-isomaltase	PATH:04973	Carbohydrate digestion and absorption	0.0271962	2.9186
Sis	Sis	Sucrase-isomaltase	PATH:00500	Starch and sucrose metabolism	0.328157	1.48683
Oprm1	Oprm1	Mu opioid receptor mMOR-1R2	PATH:04915	Estrogen signaling pathway	0.0327268	2.14427
Oprm1	Oprm1	Mu opioid receptor mMOR-1R2	PATH:05032	Morphine addiction	0.00249349	2.85515
Oprm1	Oprm1	Mu opioid receptor mMOR-1R2	PATH:04080	Neuroactive ligand-receptor interaction	0.187052	1.30405
Csk	Csk	Tyrosine-protein kinase CSK	PATH:04062	Chemokine signaling pathway	0.494867	1.05069
Csk	Csk	Tyrosine-protein kinase CSK	PATH:04810	Regulation of actin cytoskeleton	0.216904	1.31337
Csk	Csk	Tyrosine-protein kinase CSK	PATH:04722	Neurotrophin signaling pathway	0.409111	1.16744
Ank3	Ank3	Ankyrin-3	PATH:05205	Proteoglycans in cancer	0.0254151	1.74341
Htr1f	Htr1f	5-hydroxytryptamine receptor 1F	PATH:04080	Neuroactive ligand-receptor interaction	0.187052	1.30405
Htr1f	Htr1f	5-hydroxytryptamine receptor 1F	PATH:04726	Serotonergic synapse	0.187557	1.44923
Dgkz	Dgkz	Diacylglycerol kinase zeta	PATH:00564	Glycerophospholipid metabolism	0.243474	1.49246
Dgkz	Dgkz	Diacylglycerol kinase zeta	PATH:04070	Phosphatidylinositol signaling system	0.00348967	2.9186
Dgkz	Dgkz	Diacylglycerol kinase zeta	PATH:01100	Metabolic pathways	0.823246	0.88785
Dgkz	Dgkz	Diacylglycerol kinase zeta	PATH:00561	Glycerolipid metabolism	0.128192	2.06019
Vapa	Vapa	Vesicle-associated membrane protein-associated protein A	PATH:04530	Tight junction	0.00182761	2.52945
Igf2	Igf2	Insulin-like growth factor 2	PATH:05205	Proteoglycans in cancer	0.0254151	1.74341
Ablim1	Ablim1	Ablim1 protein	PATH:04360	Axon guidance	0.0129914	2.15628
Olfr601	Olfr601	Protein Olfr601	PATH:04740	Olfactory transduction	1	0.344329
Pgm2	Pgm1	Phosphoglucomutase-2	PATH:00230	Purine metabolism	0.137316	1.48403
Pgm2	Pgm1	Phosphoglucomutase-2	PATH:00010	Glycolysis / Gluconeogenesis	0.698373	0.833884
Pgm2	Pgm1	Phosphoglucomutase-2	PATH:00052	Galactose metabolism	0.120714	2.46257
Pgm2	Pgm1	Phosphoglucomutase-2	PATH:00030	Pentose phosphate pathway	0.676231	0.905771
Pgm2	Pgm1	Phosphoglucomutase-2	PATH:00520	Amino sugar and nucleotide sugar metabolism	0.108746	2.18895
Pgm2	Pgm1	Phosphoglucomutase-2	PATH:01100	Metabolic pathways	0.823246	0.88785
Pgm2	Pgm1	Phosphoglucomutase-2	PATH:00500	Starch and sucrose metabolism	0.328157	1.48683
Sipa1l1	Sipa1l1	Sipa1l1 protein	PATH:04015	Rap1 signaling pathway	0.0035219	2.06734
Pard3	Pard3	Par-3 (Partitioning defective 3) homolog (C. elegans)	PATH:04144	Endocytosis	0.136617	1.42628
Pard3	Pard3	Par-3 (Partitioning defective 3) homolog (C. elegans)	PATH:04530	Tight junction	0.00182761	2.52945
Pard3	Pard3	Par-3 (Partitioning defective 3) homolog (C. elegans)	PATH:04520	Adherens junction	0.00138713	3.32967
Pard3	Pard3	Par-3 (Partitioning defective 3) homolog (C. elegans)	PATH:04062	Chemokine signaling pathway	0.494867	1.05069
Pard3	Pard3	Par-3 (Partitioning defective 3) homolog (C. elegans)	PATH:04080	Neuroactive ligand-receptor interaction	0.187052	1.30405
Pard3	Pard3	Par-3 (Partitioning defective 3) homolog (C. elegans)	PATH:04390	Hippo signaling pathway	0.0142745	2.04681
Pard3	Pard3	Par-3 (Partitioning defective 3) homolog (C. elegans)	PATH:04015	Rap1 signaling pathway	0.0035219	2.06734
Rapgef4	Rapgef4	Rapgef4 protein	PATH:04261	Adrenergic signaling in cardiomyocytes	0.217226	1.39165
Rapgef4	Rapgef4	Rapgef4 protein	PATH:04670	Leukocyte transendothelial migration	0.0866224	1.75116
Rapgef4	Rapgef4	Rapgef4 protein	PATH:04911	Insulin secretion	0.236347	1.50962
Rapgef4	Rapgef4	Rapgef4 protein	PATH:04015	Rap1 signaling pathway	0.0035219	2.06734
Magi2	Magi2	Putative uncharacterized protein	PATH:04530	Tight junction	0.00182761	2.52945
Magi2	Magi2	Putative uncharacterized protein	PATH:04668	TNF signaling pathway	0.401076	1.20492
Magi2	Magi2	Putative uncharacterized protein	PATH:04015	Rap1 signaling pathway	0.0035219	2.06734
Gda	Gda	Guanine deaminase	PATH:00230	Purine metabolism	0.137316	1.48403
Gda	Gda	Guanine deaminase	PATH:01100	Metabolic pathways	0.823246	0.88785
Tjp1	Tjp1	Tjp1 protein	PATH:04540	Gap junction	0.243474	1.49246
Tjp1	Tjp1	Tjp1 protein	PATH:04530	Tight junction	0.00182761	2.52945
Tjp1	Tjp1	Tjp1 protein	PATH:04520	Adherens junction	0.00138713	3.32967
Tjp1	Tjp1	Tjp1 protein	PATH:05132	Salmonella infection	0.0796861	1.99499
Ndufs4	Ndufs4	NADH dehydrogenase [ubiquinone] iron-sulfur protein 4, mitochondrial	PATH:05012	Parkinson's disease	0.84052	0.686728
Ndufs4	Ndufs4	NADH dehydrogenase [ubiquinone] iron-sulfur protein 4, mitochondrial	PATH:00190	Oxidative phosphorylation	0.627876	0.931467
Ndufs4	Ndufs4	NADH dehydrogenase [ubiquinone] iron-sulfur protein 4, mitochondrial	PATH:05010	Alzheimer's disease	0.372701	1.17396
Ndufs4	Ndufs4	NADH dehydrogenase [ubiquinone] iron-sulfur protein 4, mitochondrial	PATH:04932	Non-alcoholic fatty liver disease (NAFLD)	0.370916	1.19397
Ndufs4	Ndufs4	NADH dehydrogenase [ubiquinone] iron-sulfur protein 4, mitochondrial	PATH:01100	Metabolic pathways	0.823246	0.88785
Ndufs4	Ndufs4	NADH dehydrogenase [ubiquinone] iron-sulfur protein 4, mitochondrial	PATH:05016	Huntington's disease	0.85879	0.687627
Rbm22	Rbm22	Pre-mRNA-splicing factor RBM22	PATH:03040	Spliceosome	0.776902	0.761373
Abcc9	Abcc9	Hemi ATP-binding cassette protein SUR2A-55	PATH:02010	ABC transporters	0.0295968	2.85515
Slc4a4	Slc4a4	Slc4a4 protein	PATH:04976	Bile secretion	0.2935	1.4593
Slc4a4	Slc4a4	Slc4a4 protein	PATH:04972	Pancreatic secretion	0.385823	1.22745
Slc4a4	Slc4a4	Slc4a4 protein	PATH:04964	Proximal tubule bicarbonate reclamation	0.574764	1.19397
Atp12a	Atp12a	Potassium-transporting ATPase alpha chain 2	PATH:00190	Oxidative phosphorylation	0.627876	0.931467
Ivns1abp	Ivns1abp	Influenza virus NS1A-binding protein homolog	PATH:05164	Influenza A	0.47128	1.0816
Dkk4	Dkk4	Dickkopf-related protein 4	PATH:04310	Wnt signaling pathway	0.017184	1.99499
Nup160	Nup160	Nuclear pore complex protein Nup160	PATH:03013	RNA transport	0.47128	1.0816
Hist1h2ab	Hist1h2ab	histone cluster 1, H2ab	PATH:05034	Alcoholism	0.881498	0.659984
Hist1h2ab	Hist1h2ab	histone cluster 1, H2ab	PATH:05322	Systemic lupus erythematosus	0.333381	1.24238
Aco1	Aco1	Cytoplasmic aconitate hydratase	PATH:00020	Citrate cycle (TCA cycle)	0.345598	1.64171
Aco1	Aco1	Cytoplasmic aconitate hydratase	PATH:01230	Biosynthesis of amino acids	0.950415	0.341135
Aco1	Aco1	Cytoplasmic aconitate hydratase	PATH:00630	Glyoxylate and dicarboxylate metabolism	0.688605	0.875579
Aco1	Aco1	Cytoplasmic aconitate hydratase	PATH:01200	Carbon metabolism	0.790746	0.722955
Aco1	Aco1	Cytoplasmic aconitate hydratase	PATH:01210	2-Oxocarboxylic acid metabolism	0.522101	1.38249
Aco1	Aco1	Cytoplasmic aconitate hydratase	PATH:01100	Metabolic pathways	0.823246	0.88785

## Sheet: UpPathway_Result
PathwayID	PathwayTerm	DifGene	AllDifGene	GeneInPathway	AllGene	P-Value	FDR	Enrichment	(-log10P)
PATH:04916	Melanogenesis	10	215	100	7565	0.000517397	0.105493	3.5186	3.28618	0.976776
PATH:04151	PI3K-Akt signaling pathway	21	215	350	7565	0.000925379	0.105493	2.11116	3.03368	0.976776
PATH:04668	TNF signaling pathway	9	215	109	7565	0.00372649	0.283213	2.90527	2.4287	0.547887
PATH:05200	Pathways in cancer	18	215	329	7565	0.00570714	0.320419	1.92507	2.24358	0.494282
PATH:04150	mTOR signaling pathway	6	215	65	7565	0.0100568	0.320419	3.24794	1.99754	0.494282
PATH:04914	Progesterone-mediated oocyte maturation	7	215	86	7565	0.0109271	0.320419	2.86398	1.9615	0.494282
PATH:04390	Hippo signaling pathway	10	215	154	7565	0.0121903	0.320419	2.28481	1.91399	0.494282
PATH:04014	Ras signaling pathway	13	215	228	7565	0.0129494	0.320419	2.00622	1.88775	0.494282
PATH:04068	FoxO signaling pathway	9	215	135	7565	0.0145401	0.320419	2.34574	1.83743	0.494282
PATH:04920	Adipocytokine signaling pathway	6	215	71	7565	0.0151648	0.320419	2.97347	1.81916	0.494282
PATH:05032	Morphine addiction	7	215	92	7565	0.0154588	0.320419	2.6772	1.81082	0.494282
PATH:04015	Rap1 signaling pathway	12	215	216	7565	0.0200058	0.345116	1.95478	1.69884	0.462035
PATH:04910	Insulin signaling pathway	9	215	143	7565	0.0204422	0.345116	2.21451	1.68947	0.462035
PATH:04713	Circadian entrainment	7	215	98	7565	0.0211913	0.345116	2.51329	1.67384	0.462035
PATH:04723	Retrograde endocannabinoid signaling	7	215	103	7565	0.0269833	0.397696	2.39128	1.56891	0.400449
PATH:04261	Adrenergic signaling in cardiomyocytes	9	215	151	7565	0.0279085	0.397696	2.09718	1.55426	0.400449
PATH:04611	Platelet activation	8	215	131	7565	0.0327921	0.402437	2.14877	1.48423	0.395302
PATH:04510	Focal adhesion	11	215	208	7565	0.0346726	0.402437	1.8608	1.46001	0.395302
PATH:04921	Oxytocin signaling pathway	9	215	158	7565	0.0358662	0.402437	2.00427	1.44532	0.395302
PATH:04360	Axon guidance	8	215	134	7565	0.0367866	0.402437	2.10066	1.43431	0.395302
PATH:04660	T cell receptor signaling pathway	7	215	111	7565	0.0383463	0.402437	2.21894	1.41628	0.395302
PATH:04727	GABAergic synapse	6	215	89	7565	0.0405967	0.402437	2.37209	1.39151	0.395302
PATH:05215	Prostate cancer	6	215	89	7565	0.0405967	0.402437	2.37209	1.39151	0.395302
PATH:05212	Pancreatic cancer	5	215	70	7565	0.0482976	0.426151	2.51329	1.31607	0.370437
PATH:04919	Thyroid hormone signaling pathway	7	215	118	7565	0.0505534	0.426151	2.08731	1.29625	0.370437
PATH:05218	Melanoma	5	215	71	7565	0.0508076	0.426151	2.47789	1.29407	0.370437
PATH:04520	Adherens junction	5	215	71	7565	0.0508076	0.426151	2.47789	1.29407	0.370437
PATH:00410	beta-Alanine metabolism	3	215	31	7565	0.0567811	0.426151	3.4051	1.2458	0.370437
PATH:05205	Proteoglycans in cancer	11	215	226	7565	0.0570435	0.426151	1.7126	1.24379	0.370437
PATH:04730	Long-term depression	5	215	74	7565	0.0587898	0.426151	2.37744	1.2307	0.370437
PATH:05213	Endometrial cancer	4	215	52	7565	0.0595478	0.426151	2.70662	1.22513	0.370437
PATH:04915	Estrogen signaling pathway	6	215	98	7565	0.059843	0.426151	2.15425	1.22299	0.370437
PATH:04340	Hedgehog signaling pathway	4	215	54	7565	0.0666332	0.426151	2.60637	1.17631	0.370437
PATH:04110	Cell cycle	7	215	126	7565	0.0672231	0.426151	1.95478	1.17248	0.370437
PATH:04620	Toll-like receptor signaling pathway	6	215	101	7565	0.067287	0.426151	2.09026	1.17207	0.370437
PATH:04912	GnRH signaling pathway	6	215	101	7565	0.067287	0.426151	2.09026	1.17207	0.370437
PATH:05217	Basal cell carcinoma	4	215	55	7565	0.0703332	0.431113	2.55899	1.15284	0.365409
PATH:04724	Glutamatergic synapse	7	215	128	7565	0.0718522	0.431113	1.92424	1.14356	0.365409
PATH:05221	Acute myeloid leukemia	4	215	57	7565	0.0780425	0.449298	2.4692	1.10767	0.347465
PATH:04310	Wnt signaling pathway	8	215	158	7565	0.080668	0.449298	1.78157	1.0933	0.347465
PATH:03008	Ribosome biogenesis in eukaryotes	5	215	82	7565	0.0833688	0.449298	2.14549	1.079	0.347465
PATH:04972	Pancreatic secretion	6	215	107	7565	0.0837225	0.449298	1.97305	1.07716	0.347465
PATH:04010	MAPK signaling pathway	12	215	271	7565	0.0847361	0.449298	1.55805	1.07193	0.347465
PATH:05016	Huntington's disease	9	215	191	7565	0.093902	0.458336	1.65798	1.02733	0.338816
PATH:00562	Inositol phosphate metabolism	4	215	61	7565	0.0946634	0.458336	2.30728	1.02382	0.338816
PATH:05160	Hepatitis C	7	215	137	7565	0.0949723	0.458336	1.79783	1.0224	0.338816
PATH:04114	Oocyte meiosis	6	215	112	7565	0.0989738	0.458336	1.88497	1.00448	0.338816
PATH:04012	ErbB signaling pathway	5	215	87	7565	0.1011	0.458336	2.02219	0.99525	0.338816
PATH:04725	Cholinergic synapse	6	215	113	7565	0.10219	0.458336	1.86829	0.99059	0.338816
PATH:04666	Fc gamma R-mediated phagocytosis	5	215	88	7565	0.104856	0.458336	1.99921	0.979405	0.338816
PATH:04540	Gap junction	5	215	88	7565	0.104856	0.458336	1.99921	0.979405	0.338816
PATH:05414	Dilated cardiomyopathy	5	215	89	7565	0.108681	0.458336	1.97674	0.963845	0.338816
PATH:04350	TGF-beta signaling pathway	5	215	89	7565	0.108681	0.458336	1.97674	0.963845	0.338816
PATH:00350	Tyrosine metabolism	3	215	41	7565	0.109983	0.458336	2.57459	0.958676	0.338816
PATH:04022	cGMP-PKG signaling pathway	8	215	170	7565	0.110899	0.458336	1.65581	0.955072	0.338816
PATH:04512	ECM-receptor interaction	5	215	90	7565	0.112574	0.458336	1.95478	0.948563	0.338816
PATH:04320	Dorso-ventral axis formation	2	215	22	7565	0.128228	0.505835	3.19873	0.892017	0.295991
PATH:04960	Aldosterone-regulated sodium reabsorption	3	215	44	7565	0.128677	0.505835	2.39905	0.890498	0.295991
PATH:00601	Glycosphingolipid biosynthesis - lacto and neolacto series	2	215	24	7565	0.147785	0.542794	2.93217	0.83037	0.265365
PATH:05211	Renal cell carcinoma	4	215	72	7565	0.147881	0.542794	1.95478	0.830089	0.265365
PATH:04380	Osteoclast differentiation	6	215	127	7565	0.152711	0.542794	1.66233	0.816128	0.265365
PATH:05220	Chronic myeloid leukemia	4	215	73	7565	0.153204	0.542794	1.928	0.81473	0.265365
PATH:04064	NF-kappa B signaling pathway	5	215	100	7565	0.154996	0.542794	1.7593	0.809679	0.265365
PATH:00520	Amino sugar and nucleotide sugar metabolism	3	215	48	7565	0.155189	0.542794	2.19913	0.809138	0.265365
PATH:00563	Glycosylphosphatidylinositol(GPI)-anchor biosynthesis	2	215	25	7565	0.157779	0.542794	2.81488	0.801952	0.265365
PATH:05412	Arrhythmogenic right ventricular cardiomyopathy (ARVC)	4	215	74	7565	0.158599	0.542794	1.90195	0.799699	0.265365
PATH:04020	Calcium signaling pathway	8	215	186	7565	0.159505	0.542794	1.51338	0.797225	0.265365
PATH:05145	Toxoplasmosis	6	215	131	7565	0.168887	0.554777	1.61157	0.772403	0.255881
PATH:04930	Type II diabetes mellitus	3	215	50	7565	0.169037	0.554777	2.11116	0.772019	0.255881
PATH:05166	HTLV-I infection	11	215	280	7565	0.173148	0.554777	1.38231	0.761583	0.255881
PATH:04970	Salivary secretion	4	215	77	7565	0.175193	0.554777	1.82785	0.756484	0.255881
PATH:04662	B cell receptor signaling pathway	4	215	77	7565	0.175193	0.554777	1.82785	0.756484	0.255881
PATH:03060	Protein export	2	215	27	7565	0.178118	0.556314	2.60637	0.749292	0.25468
PATH:00400	Phenylalanine, tyrosine and tryptophan biosynthesis	1	215	7	7565	0.182828	0.559719	5.02658	0.737958	0.25203
PATH:04722	Neurotrophin signaling pathway	6	215	135	7565	0.18575	0.559719	1.56382	0.731071	0.25203
PATH:05100	Bacterial invasion of epithelial cells	4	215	79	7565	0.186573	0.559719	1.78157	0.729151	0.25203
PATH:00500	Starch and sucrose metabolism	3	215	53	7565	0.190438	0.563894	1.99166	0.720246	0.248802
PATH:00030	Pentose phosphate pathway	2	215	29	7565	0.198831	0.56995	2.42662	0.701516	0.244163
PATH:05203	Viral carcinogenesis	9	215	228	7565	0.200578	0.56995	1.38892	0.697716	0.244163
PATH:04066	HIF-1 signaling pathway	5	215	110	7565	0.202978	0.56995	1.59937	0.69255	0.244163
PATH:04120	Ubiquitin mediated proteolysis	6	215	140	7565	0.207712	0.56995	1.50797	0.682539	0.244163
PATH:05216	Thyroid cancer	2	215	30	7565	0.209294	0.56995	2.34574	0.679243	0.244163
PATH:04664	Fc epsilon RI signaling pathway	4	215	83	7565	0.210014	0.56995	1.69571	0.677753	0.244163
PATH:00480	Glutathione metabolism	3	215	56	7565	0.212481	0.56995	1.88497	0.672679	0.244163
PATH:05223	Non-small cell lung cancer	3	215	56	7565	0.212481	0.56995	1.88497	0.672679	0.244163
PATH:05410	Hypertrophic cardiomyopathy (HCM)	4	215	84	7565	0.216002	0.572656	1.67553	0.665543	0.242106
PATH:00052	Galactose metabolism	2	215	32	7565	0.230374	0.595441	2.19913	0.637567	0.225161
PATH:04911	Insulin secretion	4	215	87	7565	0.234237	0.595441	1.61775	0.630344	0.225161
PATH:04210	Apoptosis	4	215	87	7565	0.234237	0.595441	1.61775	0.630344	0.225161
PATH:00330	Arginine and proline metabolism	3	215	59	7565	0.235042	0.595441	1.78912	0.628854	0.225161
PATH:04974	Protein digestion and absorption	4	215	89	7565	0.246597	0.60786	1.5814	0.608013	0.216196
PATH:05222	Small cell lung cancer	4	215	89	7565	0.246597	0.60786	1.5814	0.608013	0.216196
PATH:04621	NOD-like receptor signaling pathway	3	215	61	7565	0.250312	0.60786	1.73046	0.601518	0.216196
PATH:00130	Ubiquinone and other terpenoid-quinone biosynthesis	1	215	10	7565	0.250609	0.60786	3.5186	0.601003	0.216196
PATH:05214	Glioma	3	215	65	7565	0.28125	0.675	1.62397	0.550907	0.170696
PATH:04622	RIG-I-like receptor signaling pathway	3	215	68	7565	0.304678	0.718733	1.55233	0.516158	0.143433
PATH:04720	Long-term potentiation	3	215	69	7565	0.312511	0.718733	1.52983	0.505135	0.143433
PATH:00290	Valine, leucine and isoleucine biosynthesis	1	215	13	7565	0.312792	0.718733	2.70662	0.504744	0.143433
PATH:03450	Non-homologous end-joining	1	215	13	7565	0.312792	0.718733	2.70662	0.504744	0.143433
PATH:05033	Nicotine addiction	2	215	40	7565	0.315234	0.718733	1.7593	0.501368	0.143433
PATH:05142	Chagas disease (American trypanosomiasis)	4	215	103	7565	0.336071	0.733243	1.36645	0.473569	0.134752
PATH:05219	Bladder cancer	2	215	42	7565	0.336243	0.733243	1.67553	0.473347	0.134752
PATH:05034	Alcoholism	7	215	199	7565	0.336952	0.733243	1.2377	0.472432	0.134752
PATH:04530	Tight junction	5	215	135	7565	0.338482	0.733243	1.30319	0.470464	0.134752
PATH:04062	Chemokine signaling pathway	7	215	200	7565	0.341595	0.733243	1.23151	0.466489	0.134752
PATH:00270	Cysteine and methionine metabolism	2	215	43	7565	0.346678	0.733243	1.63656	0.460074	0.134752
PATH:00604	Glycosphingolipid biosynthesis - ganglio series	1	215	15	7565	0.351366	0.733243	2.34574	0.45424	0.134752
PATH:00603	Glycosphingolipid biosynthesis - globo series	1	215	15	7565	0.351366	0.733243	2.34574	0.45424	0.134752
PATH:05133	Pertussis	3	215	74	7565	0.351693	0.733243	1.42646	0.453837	0.134752
PATH:04962	Vasopressin-regulated water reabsorption	2	215	44	7565	0.357059	0.733243	1.59937	0.44726	0.134752
PATH:04973	Carbohydrate digestion and absorption	2	215	45	7565	0.36738	0.733243	1.56382	0.434884	0.134752
PATH:00380	Tryptophan metabolism	2	215	45	7565	0.36738	0.733243	1.56382	0.434884	0.134752
PATH:00600	Sphingolipid metabolism	2	215	45	7565	0.36738	0.733243	1.56382	0.434884	0.134752
PATH:00120	Primary bile acid biosynthesis	1	215	16	7565	0.369837	0.733243	2.19913	0.431989	0.134752
PATH:00770	Pantothenate and CoA biosynthesis	1	215	16	7565	0.369837	0.733243	2.19913	0.431989	0.134752
PATH:04370	VEGF signaling pathway	3	215	78	7565	0.382874	0.752545	1.35331	0.416944	0.123467
PATH:04260	Cardiac muscle contraction	3	215	79	7565	0.390623	0.761213	1.33618	0.408243	0.118494
PATH:05161	Hepatitis B	5	215	145	7565	0.395281	0.763763	1.21331	0.403094	0.117042
PATH:04070	Phosphatidylinositol signaling system	3	215	81	7565	0.406046	0.771488	1.30319	0.391425	0.112671
PATH:03018	RNA degradation	3	215	81	7565	0.406046	0.771488	1.30319	0.391425	0.112671
PATH:04080	Neuroactive ligand-receptor interaction	9	215	282	7565	0.409448	0.771523	1.12296	0.387801	0.112651
PATH:01212	Fatty acid metabolism	2	215	50	7565	0.417933	0.774122	1.40744	0.378893	0.111191
PATH:00510	N-Glycan biosynthesis	2	215	50	7565	0.417933	0.774122	1.40744	0.378893	0.111191
PATH:00561	Glycerolipid metabolism	2	215	51	7565	0.427804	0.774122	1.37984	0.368755	0.111191
PATH:00280	Valine, leucine and isoleucine degradation	2	215	51	7565	0.427804	0.774122	1.37984	0.368755	0.111191
PATH:03460	Fanconi anemia pathway	2	215	51	7565	0.427804	0.774122	1.37984	0.368755	0.111191
PATH:04810	Regulation of actin cytoskeleton	7	215	220	7565	0.435285	0.781457	1.11956	0.361226	0.107095
PATH:04144	Endocytosis	7	215	221	7565	0.43996	0.783679	1.11449	0.356587	0.105862
PATH:04670	Leukocyte transendothelial migration	4	215	120	7565	0.445887	0.78808	1.17287	0.350775	0.10343
PATH:00360	Phenylalanine metabolism	1	215	21	7565	0.454627	0.797347	1.67553	0.342344	0.0983528
PATH:04961	Endocrine and other factor-regulated calcium reabsorption	2	215	55	7565	0.46638	0.806006	1.27949	0.33126	0.0936616
PATH:00900	Terpenoid backbone biosynthesis	1	215	22	7565	0.47017	0.806006	1.59937	0.327745	0.0936616
PATH:03430	Mismatch repair	1	215	22	7565	0.47017	0.806006	1.59937	0.327745	0.0936616
PATH:05014	Amyotrophic lateral sclerosis (ALS)	2	215	56	7565	0.475784	0.807469	1.25664	0.322591	0.0928742
PATH:04060	Cytokine-cytokine receptor interaction	8	215	264	7565	0.478107	0.807469	1.06624	0.320475	0.0928742
PATH:04750	Inflammatory mediator regulation of TRP channels	4	215	126	7565	0.483521	0.810608	1.11702	0.315585	0.0911889
PATH:00062	Fatty acid elongation	1	215	24	7565	0.499946	0.825943	1.46609	0.301077	0.0830498
PATH:00592	alpha-Linolenic acid metabolism	1	215	25	7565	0.514203	0.825943	1.40744	0.288866	0.0830498
PATH:01040	Biosynthesis of unsaturated fatty acids	1	215	25	7565	0.514203	0.825943	1.40744	0.288866	0.0830498
PATH:04728	Dopaminergic synapse	4	215	133	7565	0.526098	0.825943	1.05823	0.278933	0.0830498
PATH:04950	Maturity onset diabetes of the young	1	215	26	7565	0.528055	0.825943	1.35331	0.277321	0.0830498
PATH:00534	Glycosaminoglycan biosynthesis - heparan sulfate / heparin	1	215	26	7565	0.528055	0.825943	1.35331	0.277321	0.0830498
PATH:03013	RNA transport	5	215	170	7565	0.533304	0.825943	1.03488	0.273025	0.0830498
PATH:00010	Glycolysis / Gluconeogenesis	2	215	63	7565	0.538698	0.825943	1.11702	0.268654	0.0830498
PATH:04721	Synaptic vesicle cycle	2	215	63	7565	0.538698	0.825943	1.11702	0.268654	0.0830498
PATH:04742	Taste transduction	2	215	63	7565	0.538698	0.825943	1.11702	0.268654	0.0830498
PATH:04966	Collecting duct acid secretion	1	215	27	7565	0.541514	0.825943	1.30319	0.26639	0.0830498
PATH:03440	Homologous recombination	1	215	27	7565	0.541514	0.825943	1.30319	0.26639	0.0830498
PATH:04744	Phototransduction	1	215	28	7565	0.554591	0.825943	1.25664	0.256027	0.0830498
PATH:00340	Histidine metabolism	1	215	28	7565	0.554591	0.825943	1.25664	0.256027	0.0830498
PATH:00512	Mucin type O-Glycan biosynthesis	1	215	28	7565	0.554591	0.825943	1.25664	0.256027	0.0830498
PATH:03040	Spliceosome	4	215	138	7565	0.555459	0.825943	1.01989	0.255348	0.0830498
PATH:00983	Drug metabolism - other enzymes	2	215	65	7565	0.555699	0.825943	1.08265	0.255161	0.0830498
PATH:05169	Epstein-Barr virus infection	6	215	211	7565	0.558339	0.825943	1.00055	0.253102	0.0830498
PATH:05210	Colorectal cancer	2	215	66	7565	0.564031	0.825943	1.06624	0.248697	0.0830498
PATH:01100	Metabolic pathways	34	215	1213	7565	0.565119	0.825943	0.986254	0.24786	0.0830498
PATH:00230	Purine metabolism	5	215	177	7565	0.569521	0.825989	0.993956	0.244491	0.0830256
PATH:05202	Transcriptional misregulation in cancer	5	215	179	7565	0.579603	0.825989	0.98285	0.236869	0.0830256
PATH:00450	Selenocompound metabolism	1	215	30	7565	0.579642	0.825989	1.17287	0.23684	0.0830256
PATH:00630	Glyoxylate and dicarboxylate metabolism	1	215	30	7565	0.579642	0.825989	1.17287	0.23684	0.0830256
PATH:04710	Circadian rhythm	1	215	31	7565	0.591636	0.829602	1.13503	0.227946	0.0811304
PATH:04726	Serotonergic synapse	4	215	145	7565	0.59489	0.829602	0.97065	0.225564	0.0811304
PATH:00640	Propanoate metabolism	1	215	32	7565	0.603289	0.829602	1.09956	0.219474	0.0811304
PATH:00760	Nicotinate and nicotinamide metabolism	1	215	32	7565	0.603289	0.829602	1.09956	0.219474	0.0811304
PATH:01200	Carbon metabolism	3	215	109	7565	0.603501	0.829602	0.968423	0.219322	0.0811304
PATH:04918	Thyroid hormone synthesis	2	215	71	7565	0.604008	0.829602	0.991156	0.218957	0.0811304
PATH:04971	Gastric acid secretion	2	215	74	7565	0.626639	0.850439	0.950974	0.202982	0.0703567
PATH:04917	Prolactin signaling pathway	2	215	74	7565	0.626639	0.850439	0.950974	0.202982	0.0703567
PATH:05020	Prion diseases	1	215	35	7565	0.636301	0.856584	1.00532	0.196337	0.0672302
PATH:04932	Non-alcoholic fatty liver disease (NAFLD)	4	215	154	7565	0.642438	0.856584	0.913923	0.192169	0.0672302
PATH:03010	Ribosome	4	215	154	7565	0.642438	0.856584	0.913923	0.192169	0.0672302
PATH:05206	MicroRNAs in cancer	7	215	270	7565	0.652332	0.858576	0.912231	0.185531	0.0662214
PATH:04630	Jak-STAT signaling pathway	4	215	156	7565	0.652497	0.858576	0.902206	0.185421	0.0662214
PATH:00250	Alanine, aspartate and glutamate metabolism	1	215	37	7565	0.656775	0.858576	0.950974	0.182583	0.0662214
PATH:05132	Salmonella infection	2	215	79	7565	0.662117	0.858576	0.890786	0.179066	0.0662214
PATH:05146	Amoebiasis	3	215	119	7565	0.662762	0.858576	0.887043	0.178642	0.0662214
PATH:00565	Ether lipid metabolism	1	215	38	7565	0.666577	0.858576	0.925949	0.176149	0.0662214
PATH:04650	Natural killer cell mediated cytotoxicity	3	215	121	7565	0.673817	0.858576	0.872381	0.171458	0.0662214
PATH:03320	PPAR signaling pathway	2	215	81	7565	0.675534	0.858576	0.868791	0.170353	0.0662214
PATH:04146	Peroxisome	2	215	82	7565	0.682079	0.858576	0.858196	0.166165	0.0662214
PATH:00260	Glycine, serine and threonine metabolism	1	215	40	7565	0.685354	0.858576	0.879651	0.164085	0.0662214
PATH:00051	Fructose and mannose metabolism	1	215	40	7565	0.685354	0.858576	0.879651	0.164085	0.0662214
PATH:00140	Steroid hormone biosynthesis	2	215	85	7565	0.701072	0.871206	0.827907	0.154237	0.0598792
PATH:04975	Fat digestion and absorption	1	215	42	7565	0.703078	0.871206	0.837763	0.152996	0.0598792
PATH:04640	Hematopoietic cell lineage	2	215	86	7565	0.707191	0.871566	0.81828	0.150463	0.0596999
PATH:04270	Vascular smooth muscle contraction	3	215	129	7565	0.715375	0.872122	0.81828	0.145466	0.0594229
PATH:05164	Influenza A	4	215	170	7565	0.717572	0.872122	0.827907	0.144135	0.0594229
PATH:00564	Glycerophospholipid metabolism	2	215	88	7565	0.719118	0.872122	0.799683	0.1432	0.0594229
PATH:05416	Viral myocarditis	2	215	89	7565	0.724927	0.873525	0.790698	0.139706	0.0587247
PATH:03050	Proteasome	1	215	46	7565	0.7356	0.873525	0.764914	0.133358	0.0587247
PATH:02010	ABC transporters	1	215	46	7565	0.7356	0.873525	0.764914	0.133358	0.0587247
PATH:04672	Intestinal immune network for IgA production	1	215	46	7565	0.7356	0.873525	0.764914	0.133358	0.0587247
PATH:04978	Mineral absorption	1	215	47	7565	0.74316	0.876921	0.748639	0.128918	0.0570398
PATH:00071	Fatty acid degradation	1	215	48	7565	0.750505	0.876921	0.733043	0.124646	0.0570398
PATH:05030	Cocaine addiction	1	215	49	7565	0.757641	0.876921	0.718083	0.120536	0.0570398
PATH:00514	Other types of O-glycan biosynthesis	1	215	49	7565	0.757641	0.876921	0.718083	0.120536	0.0570398
PATH:03015	mRNA surveillance pathway	2	215	95	7565	0.75769	0.876921	0.740759	0.120508	0.0570398
PATH:05144	Malaria	1	215	50	7565	0.764574	0.880419	0.703721	0.11658	0.0553107
PATH:00190	Oxidative phosphorylation	3	215	141	7565	0.769907	0.882104	0.748639	0.113562	0.0544801
PATH:00591	Linoleic acid metabolism	1	215	52	7565	0.777853	0.886753	0.676655	0.109102	0.0521975
PATH:04913	Ovarian steroidogenesis	1	215	58	7565	0.81338	0.919553	0.606656	0.0897063	0.0364231
PATH:04514	Cell adhesion molecules (CAMs)	3	215	153	7565	0.815647	0.919553	0.689922	0.0884975	0.0364231
PATH:04940	Type I diabetes mellitus	1	215	59	7565	0.818725	0.919553	0.596374	0.0868619	0.0364231
PATH:04623	Cytosolic DNA-sensing pathway	1	215	63	7565	0.838623	0.937285	0.558509	0.0764332	0.0281285
PATH:00970	Aminoacyl-tRNA biosynthesis	1	215	64	7565	0.843248	0.937856	0.549782	0.0740447	0.0278637
PATH:05140	Leishmaniasis	1	215	65	7565	0.847741	0.938276	0.541324	0.0717369	0.0276692
PATH:04115	p53 signaling pathway	1	215	68	7565	0.860465	0.947588	0.517442	0.0652668	0.0233802
PATH:05031	Amphetamine addiction	1	215	69	7565	0.864467	0.947588	0.509943	0.0632518	0.0233802
PATH:04142	Lysosome	2	215	123	7565	0.869573	0.948625	0.572131	0.0606941	0.0229055
PATH:04976	Bile secretion	1	215	72	7565	0.875799	0.950867	0.488695	0.0575956	0.02188
PATH:05152	Tuberculosis	3	215	178	7565	0.886673	0.951025	0.593023	0.0522366	0.0218083
PATH:05010	Alzheimer's disease	3	215	179	7565	0.888927	0.951025	0.58971	0.0511341	0.0218083
PATH:04610	Complement and coagulation cascades	1	215	76	7565	0.889455	0.951025	0.462974	0.0508762	0.0218083
PATH:01230	Biosynthesis of amino acids	1	215	77	7565	0.892628	0.951025	0.456962	0.0493293	0.0218083
PATH:04612	Antigen processing and presentation	1	215	79	7565	0.898706	0.953046	0.445393	0.0463823	0.020886
PATH:05162	Measles	2	215	137	7565	0.905632	0.955944	0.513665	0.0430484	0.0195674
PATH:05323	Rheumatoid arthritis	1	215	84	7565	0.912444	0.958696	0.418882	0.039794	0.0183189
PATH:05168	Herpes simplex infection	3	215	200	7565	0.927868	0.962929	0.527791	0.0325136	0.0164057
PATH:05204	Chemical carcinogenesis	1	215	92	7565	0.930669	0.962929	0.382457	0.0312046	0.0164057
PATH:05012	Parkinson's disease	2	215	153	7565	0.935397	0.962929	0.459948	0.0290042	0.0164057
PATH:00980	Metabolism of xenobiotics by cytochrome P450	1	215	96	7565	0.938312	0.962929	0.366521	0.0276529	0.0164057
PATH:00590	Arachidonic acid metabolism	1	215	98	7565	0.941812	0.962929	0.359041	0.0260357	0.0164057
PATH:00982	Drug metabolism - cytochrome P450	1	215	98	7565	0.941812	0.962929	0.359041	0.0260357	0.0164057
PATH:00240	Pyrimidine metabolism	1	215	106	7565	0.953945	0.97098	0.331944	0.0204767	0.0127898
PATH:05322	Systemic lupus erythematosus	1	215	148	7565	0.986563	0.997944	0.237744	0.00587504	0.000893684
PATH:04141	Protein processing in endoplasmic reticulum	1	215	169	7565	0.992762	0.997944	0.208201	0.00315506	0.000893684
PATH:04145	Phagosome	1	215	173	7565	0.993567	0.997944	0.203388	0.00280267	0.000893684
PATH:04740	Olfactory transduction	11	215	1068	7565	0.999995	0.999995	0.362403	2.00219e-06	2.00219e-06

## Sheet: UpPathway2Gene
PathwayID	PathwayTerm	QueryID	Symbol	Description	P-Value	FDR	Enrichment
PATH:04916	Melanogenesis	Edn1	Edn1	Endothelin-1	0.000517397	0.105493	3.5186
PATH:04916	Melanogenesis	Wnt5a	Wnt5a	Protein Wnt-5a	0.000517397	0.105493	3.5186
PATH:04916	Melanogenesis	Wnt3	Wnt3	Protein Wnt	0.000517397	0.105493	3.5186
PATH:04916	Melanogenesis	Dct	Dct	L-dopachrome tautomerase	0.000517397	0.105493	3.5186
PATH:04916	Melanogenesis	Kit	Kit	KIT oncogene	0.000517397	0.105493	3.5186
PATH:04916	Melanogenesis	a	a	Agouti-signaling protein	0.000517397	0.105493	3.5186
PATH:04916	Melanogenesis	Adcy9	Adcy9	Adenylate cyclase type 9	0.000517397	0.105493	3.5186
PATH:04916	Melanogenesis	Creb1	Creb1	Cyclic AMP-responsive element-binding protein 1	0.000517397	0.105493	3.5186
PATH:04916	Melanogenesis	Mapk3	Mapk3	Mitogen-activated protein kinase 3	0.000517397	0.105493	3.5186
PATH:04916	Melanogenesis	Wnt11	Wnt11	Protein Wnt-11	0.000517397	0.105493	3.5186
PATH:04151	PI3K-Akt signaling pathway	Fgf20	Fgf20	Fibroblast growth factor 20	0.000925379	0.105493	2.11116
PATH:04151	PI3K-Akt signaling pathway	Tnr	Tnr	Tenascin-R	0.000925379	0.105493	2.11116
PATH:04151	PI3K-Akt signaling pathway	Gng8	Gng8	Guanine nucleotide-binding protein G(I)/G(S)/G(O) subunit gamma-8	0.000925379	0.105493	2.11116
PATH:04151	PI3K-Akt signaling pathway	Rheb	Rheb	RHEB-like protein	0.000925379	0.105493	2.11116
PATH:04151	PI3K-Akt signaling pathway	Gnb4	Gnb4	Guanine nucleotide-binding protein subunit beta-4	0.000925379	0.105493	2.11116
PATH:04151	PI3K-Akt signaling pathway	Col3a1	Col3a1	Collagen alpha-1(III) chain	0.000925379	0.105493	2.11116
PATH:04151	PI3K-Akt signaling pathway	Met	Met	Met protein	0.000925379	0.105493	2.11116
PATH:04151	PI3K-Akt signaling pathway	Pik3cd	Pik3cd	Phosphatidylinositol 4,5-bisphosphate 3-kinase catalytic subunit delta isoform	0.000925379	0.105493	2.11116
PATH:04151	PI3K-Akt signaling pathway	Ppp2r1b	Ppp2r1b	Serine/threonine-protein phosphatase 2A 65 kDa regulatory subunit A beta isoform	0.000925379	0.105493	2.11116
PATH:04151	PI3K-Akt signaling pathway	Vwf	Vwf	Vwf protein	0.000925379	0.105493	2.11116
PATH:04151	PI3K-Akt signaling pathway	Kit	Kit	KIT oncogene	0.000925379	0.105493	2.11116
PATH:04151	PI3K-Akt signaling pathway	Ngf	Ngf	Beta-nerve growth factor	0.000925379	0.105493	2.11116
PATH:04151	PI3K-Akt signaling pathway	Rbl2	Rbl2	Putative uncharacterized protein	0.000925379	0.105493	2.11116
PATH:04151	PI3K-Akt signaling pathway	Itga8	Itga8	Integrin alpha-8	0.000925379	0.105493	2.11116
PATH:04151	PI3K-Akt signaling pathway	Creb1	Creb1	Cyclic AMP-responsive element-binding protein 1	0.000925379	0.105493	2.11116
PATH:04151	PI3K-Akt signaling pathway	Syk	Syk	Tyrosine-protein kinase SYK	0.000925379	0.105493	2.11116
PATH:04151	PI3K-Akt signaling pathway	Mapk3	Mapk3	Mitogen-activated protein kinase 3	0.000925379	0.105493	2.11116
PATH:04151	PI3K-Akt signaling pathway	G6pc2	G6pc2	Glucose-6-phosphatase 2	0.000925379	0.105493	2.11116
PATH:04151	PI3K-Akt signaling pathway	Rptor	Rptor	Regulatory-associated protein of mTOR	0.000925379	0.105493	2.11116
PATH:04151	PI3K-Akt signaling pathway	Egfr	Egfr	Truncated epidermal growth factor receptor	0.000925379	0.105493	2.11116
PATH:04151	PI3K-Akt signaling pathway	Ikbkb	Ikbkb	Inhibitor of nuclear factor kappa-B kinase subunit beta	0.000925379	0.105493	2.11116
PATH:04668	TNF signaling pathway	Edn1	Edn1	Endothelin-1	0.00372649	0.283213	2.90527
PATH:04668	TNF signaling pathway	Traf3	Traf3	TNF receptor-associated factor 3	0.00372649	0.283213	2.90527
PATH:04668	TNF signaling pathway	Pik3cd	Pik3cd	Phosphatidylinositol 4,5-bisphosphate 3-kinase catalytic subunit delta isoform	0.00372649	0.283213	2.90527
PATH:04668	TNF signaling pathway	Mmp14	Mmp14	Matrix metalloproteinase-14	0.00372649	0.283213	2.90527
PATH:04668	TNF signaling pathway	Map3k8	Map3k8	Mitogen-activated protein kinase kinase kinase 8	0.00372649	0.283213	2.90527
PATH:04668	TNF signaling pathway	Creb1	Creb1	Cyclic AMP-responsive element-binding protein 1	0.00372649	0.283213	2.90527
PATH:04668	TNF signaling pathway	Mapk3	Mapk3	Mitogen-activated protein kinase 3	0.00372649	0.283213	2.90527
PATH:04668	TNF signaling pathway	Birc2	Birc2	Baculoviral IAP repeat-containing protein 2	0.00372649	0.283213	2.90527
PATH:04668	TNF signaling pathway	Ikbkb	Ikbkb	Inhibitor of nuclear factor kappa-B kinase subunit beta	0.00372649	0.283213	2.90527
PATH:05200	Pathways in cancer	Tfg	Tfg	Protein Tfg	0.00570714	0.320419	1.92507
PATH:05200	Pathways in cancer	Fgf20	Fgf20	Fibroblast growth factor 20	0.00570714	0.320419	1.92507
PATH:05200	Pathways in cancer	Mecom	Mecom	Evi1 protein	0.00570714	0.320419	1.92507
PATH:05200	Pathways in cancer	Wnt5a	Wnt5a	Protein Wnt-5a	0.00570714	0.320419	1.92507
PATH:05200	Pathways in cancer	Traf3	Traf3	TNF receptor-associated factor 3	0.00570714	0.320419	1.92507
PATH:05200	Pathways in cancer	Wnt3	Wnt3	Protein Wnt	0.00570714	0.320419	1.92507
PATH:05200	Pathways in cancer	Brca2	Brca2	Breast cancer type 2 susceptibility protein homolog	0.00570714	0.320419	1.92507
PATH:05200	Pathways in cancer	Met	Met	Met protein	0.00570714	0.320419	1.92507
PATH:05200	Pathways in cancer	Pik3cd	Pik3cd	Phosphatidylinositol 4,5-bisphosphate 3-kinase catalytic subunit delta isoform	0.00570714	0.320419	1.92507
PATH:05200	Pathways in cancer	Vhl	Vhl	Von Hippel-Lindau disease tumor suppressor	0.00570714	0.320419	1.92507
PATH:05200	Pathways in cancer	Kit	Kit	KIT oncogene	0.00570714	0.320419	1.92507
PATH:05200	Pathways in cancer	Ctnna3	Ctnna3	Alpha-T-catenin isoform X	0.00570714	0.320419	1.92507
PATH:05200	Pathways in cancer	Bmp2	Bmp2	Bone morphogenetic protein 2	0.00570714	0.320419	1.92507
PATH:05200	Pathways in cancer	Mapk3	Mapk3	Mitogen-activated protein kinase 3	0.00570714	0.320419	1.92507
PATH:05200	Pathways in cancer	Wnt11	Wnt11	Protein Wnt-11	0.00570714	0.320419	1.92507
PATH:05200	Pathways in cancer	Egfr	Egfr	Truncated epidermal growth factor receptor	0.00570714	0.320419	1.92507
PATH:05200	Pathways in cancer	Birc2	Birc2	Baculoviral IAP repeat-containing protein 2	0.00570714	0.320419	1.92507
PATH:05200	Pathways in cancer	Ikbkb	Ikbkb	Inhibitor of nuclear factor kappa-B kinase subunit beta	0.00570714	0.320419	1.92507
PATH:04150	mTOR signaling pathway	Rps6ka2	Rps6ka2	Putative uncharacterized protein	0.0100568	0.320419	3.24794
PATH:04150	mTOR signaling pathway	Rheb	Rheb	RHEB-like protein	0.0100568	0.320419	3.24794
PATH:04150	mTOR signaling pathway	Pik3cd	Pik3cd	Phosphatidylinositol 4,5-bisphosphate 3-kinase catalytic subunit delta isoform	0.0100568	0.320419	3.24794
PATH:04150	mTOR signaling pathway	Mapk3	Mapk3	Mitogen-activated protein kinase 3	0.0100568	0.320419	3.24794
PATH:04150	mTOR signaling pathway	Rptor	Rptor	Regulatory-associated protein of mTOR	0.0100568	0.320419	3.24794
PATH:04150	mTOR signaling pathway	Ikbkb	Ikbkb	Inhibitor of nuclear factor kappa-B kinase subunit beta	0.0100568	0.320419	3.24794
PATH:04914	Progesterone-mediated oocyte maturation	Rps6ka2	Rps6ka2	Putative uncharacterized protein	0.0109271	0.320419	2.86398
PATH:04914	Progesterone-mediated oocyte maturation	Pik3cd	Pik3cd	Phosphatidylinositol 4,5-bisphosphate 3-kinase catalytic subunit delta isoform	0.0109271	0.320419	2.86398
PATH:04914	Progesterone-mediated oocyte maturation	Adcy9	Adcy9	Adenylate cyclase type 9	0.0109271	0.320419	2.86398
PATH:04914	Progesterone-mediated oocyte maturation	Anapc1	Anapc1	Anaphase-promoting complex subunit 1	0.0109271	0.320419	2.86398
PATH:04914	Progesterone-mediated oocyte maturation	Pde3b	Pde3b	cGMP-inhibited 3',5'-cyclic phosphodiesterase B	0.0109271	0.320419	2.86398
PATH:04914	Progesterone-mediated oocyte maturation	Mapk3	Mapk3	Mitogen-activated protein kinase 3	0.0109271	0.320419	2.86398
PATH:04914	Progesterone-mediated oocyte maturation	Pgr	Pgr	Progesterone receptor	0.0109271	0.320419	2.86398
PATH:04390	Hippo signaling pathway	Wnt5a	Wnt5a	Protein Wnt-5a	0.0121903	0.320419	2.28481
PATH:04390	Hippo signaling pathway	Wwc1	Wwc1	Protein KIBRA	0.0121903	0.320419	2.28481
PATH:04390	Hippo signaling pathway	Wnt3	Wnt3	Protein Wnt	0.0121903	0.320419	2.28481
PATH:04390	Hippo signaling pathway	Ppp2r1b	Ppp2r1b	Serine/threonine-protein phosphatase 2A 65 kDa regulatory subunit A beta isoform	0.0121903	0.320419	2.28481
PATH:04390	Hippo signaling pathway	Crb1	Crb1	Crb1 protein	0.0121903	0.320419	2.28481
PATH:04390	Hippo signaling pathway	Ctnna3	Ctnna3	Alpha-T-catenin isoform X	0.0121903	0.320419	2.28481
PATH:04390	Hippo signaling pathway	Bmp2	Bmp2	Bone morphogenetic protein 2	0.0121903	0.320419	2.28481
PATH:04390	Hippo signaling pathway	Wnt11	Wnt11	Protein Wnt-11	0.0121903	0.320419	2.28481
PATH:04390	Hippo signaling pathway	Tead1	Tead1	Transcriptional enhancer factor TEF-1	0.0121903	0.320419	2.28481
PATH:04390	Hippo signaling pathway	Birc2	Birc2	Baculoviral IAP repeat-containing protein 2	0.0121903	0.320419	2.28481
PATH:04014	Ras signaling pathway	Fgf20	Fgf20	Fibroblast growth factor 20	0.0129494	0.320419	2.00622
PATH:04014	Ras signaling pathway	Abl2	Abl2	Abelson tyrosine-protein kinase 2	0.0129494	0.320419	2.00622
PATH:04014	Ras signaling pathway	Gng8	Gng8	Guanine nucleotide-binding protein G(I)/G(S)/G(O) subunit gamma-8	0.0129494	0.320419	2.00622
PATH:04014	Ras signaling pathway	Pla2g6	Pla2g6	85/88 kDa calcium-independent phospholipase A2	0.0129494	0.320419	2.00622
PATH:04014	Ras signaling pathway	Gnb4	Gnb4	Guanine nucleotide-binding protein subunit beta-4	0.0129494	0.320419	2.00622
PATH:04014	Ras signaling pathway	Met	Met	Met protein	0.0129494	0.320419	2.00622
PATH:04014	Ras signaling pathway	Pik3cd	Pik3cd	Phosphatidylinositol 4,5-bisphosphate 3-kinase catalytic subunit delta isoform	0.0129494	0.320419	2.00622
PATH:04014	Ras signaling pathway	Kit	Kit	KIT oncogene	0.0129494	0.320419	2.00622
PATH:04014	Ras signaling pathway	Ngf	Ngf	Beta-nerve growth factor	0.0129494	0.320419	2.00622
PATH:04014	Ras signaling pathway	Plce1	Plce1	Phosphoinositide phospholipase C	0.0129494	0.320419	2.00622
PATH:04014	Ras signaling pathway	Mapk3	Mapk3	Mitogen-activated protein kinase 3	0.0129494	0.320419	2.00622
PATH:04014	Ras signaling pathway	Egfr	Egfr	Truncated epidermal growth factor receptor	0.0129494	0.320419	2.00622
PATH:04014	Ras signaling pathway	Ikbkb	Ikbkb	Inhibitor of nuclear factor kappa-B kinase subunit beta	0.0129494	0.320419	2.00622
PATH:04068	FoxO signaling pathway	Bcl6	Bcl6	B-cell lymphoma 6 protein homolog	0.0145401	0.320419	2.34574
PATH:04068	FoxO signaling pathway	Pik3cd	Pik3cd	Phosphatidylinositol 4,5-bisphosphate 3-kinase catalytic subunit delta isoform	0.0145401	0.320419	2.34574
PATH:04068	FoxO signaling pathway	Rbl2	Rbl2	Putative uncharacterized protein	0.0145401	0.320419	2.34574
PATH:04068	FoxO signaling pathway	Cat	Cat	Catalase, isoform CRA_a	0.0145401	0.320419	2.34574
PATH:04068	FoxO signaling pathway	Mapk3	Mapk3	Mitogen-activated protein kinase 3	0.0145401	0.320419	2.34574
PATH:04068	FoxO signaling pathway	Grm1	Grm1	Metabotropic glutamate receptor 1	0.0145401	0.320419	2.34574
PATH:04068	FoxO signaling pathway	G6pc2	G6pc2	Glucose-6-phosphatase 2	0.0145401	0.320419	2.34574
PATH:04068	FoxO signaling pathway	Egfr	Egfr	Truncated epidermal growth factor receptor	0.0145401	0.320419	2.34574
PATH:04068	FoxO signaling pathway	Ikbkb	Ikbkb	Inhibitor of nuclear factor kappa-B kinase subunit beta	0.0145401	0.320419	2.34574
PATH:04920	Adipocytokine signaling pathway	Acsl1	Acsl1	Long-chain-fatty-acid--CoA ligase 1	0.0151648	0.320419	2.97347
PATH:04920	Adipocytokine signaling pathway	Lep	Lep	Leptin	0.0151648	0.320419	2.97347
PATH:04920	Adipocytokine signaling pathway	Npy	Npy	Pro-neuropeptide Y	0.0151648	0.320419	2.97347
PATH:04920	Adipocytokine signaling pathway	Ppargc1a	Ppargc1a	Peroxisome proliferator-activated receptor gamma coactivator 1-alpha	0.0151648	0.320419	2.97347
PATH:04920	Adipocytokine signaling pathway	G6pc2	G6pc2	Glucose-6-phosphatase 2	0.0151648	0.320419	2.97347
PATH:04920	Adipocytokine signaling pathway	Ikbkb	Ikbkb	Inhibitor of nuclear factor kappa-B kinase subunit beta	0.0151648	0.320419	2.97347
PATH:05032	Morphine addiction	Gng8	Gng8	Guanine nucleotide-binding protein G(I)/G(S)/G(O) subunit gamma-8	0.0154588	0.320419	2.6772
PATH:05032	Morphine addiction	Pde7b	Pde7b	cAMP-specific 3',5'-cyclic phosphodiesterase 7B	0.0154588	0.320419	2.6772
PATH:05032	Morphine addiction	Gnb4	Gnb4	Guanine nucleotide-binding protein subunit beta-4	0.0154588	0.320419	2.6772
PATH:05032	Morphine addiction	Gabrg2	Gabrg2	Gamma-aminobutyric acid receptor subunit gamma-2	0.0154588	0.320419	2.6772
PATH:05032	Morphine addiction	Adcy9	Adcy9	Adenylate cyclase type 9	0.0154588	0.320419	2.6772
PATH:05032	Morphine addiction	Gabra2	Gabra2	Gamma-aminobutyric acid receptor subunit alpha-2	0.0154588	0.320419	2.6772
PATH:05032	Morphine addiction	Pde3b	Pde3b	cGMP-inhibited 3',5'-cyclic phosphodiesterase B	0.0154588	0.320419	2.6772
PATH:04015	Rap1 signaling pathway	Fgf20	Fgf20	Fibroblast growth factor 20	0.0200058	0.345116	1.95478
PATH:04015	Rap1 signaling pathway	Arap2	Arap2	Arf-GAP with Rho-GAP domain, ANK repeat and PH domain-containing protein 2	0.0200058	0.345116	1.95478
PATH:04015	Rap1 signaling pathway	Met	Met	Met protein	0.0200058	0.345116	1.95478
PATH:04015	Rap1 signaling pathway	Pik3cd	Pik3cd	Phosphatidylinositol 4,5-bisphosphate 3-kinase catalytic subunit delta isoform	0.0200058	0.345116	1.95478
PATH:04015	Rap1 signaling pathway	Kit	Kit	KIT oncogene	0.0200058	0.345116	1.95478
PATH:04015	Rap1 signaling pathway	Ngf	Ngf	Beta-nerve growth factor	0.0200058	0.345116	1.95478
PATH:04015	Rap1 signaling pathway	Adcy9	Adcy9	Adenylate cyclase type 9	0.0200058	0.345116	1.95478
PATH:04015	Rap1 signaling pathway	Plce1	Plce1	Phosphoinositide phospholipase C	0.0200058	0.345116	1.95478
PATH:04015	Rap1 signaling pathway	Mapk3	Mapk3	Mitogen-activated protein kinase 3	0.0200058	0.345116	1.95478
PATH:04015	Rap1 signaling pathway	Egfr	Egfr	Truncated epidermal growth factor receptor	0.0200058	0.345116	1.95478
PATH:04015	Rap1 signaling pathway	Rapgef4	Rapgef4	Rapgef4 protein	0.0200058	0.345116	1.95478
PATH:04015	Rap1 signaling pathway	Tln2	Tln2	Tln2 protein	0.0200058	0.345116	1.95478
PATH:04910	Insulin signaling pathway	Rheb	Rheb	RHEB-like protein	0.0204422	0.345116	2.21451
PATH:04910	Insulin signaling pathway	Pik3cd	Pik3cd	Phosphatidylinositol 4,5-bisphosphate 3-kinase catalytic subunit delta isoform	0.0204422	0.345116	2.21451
PATH:04910	Insulin signaling pathway	Ppargc1a	Ppargc1a	Peroxisome proliferator-activated receptor gamma coactivator 1-alpha	0.0204422	0.345116	2.21451
PATH:04910	Insulin signaling pathway	Pde3b	Pde3b	cGMP-inhibited 3',5'-cyclic phosphodiesterase B	0.0204422	0.345116	2.21451
PATH:04910	Insulin signaling pathway	Mapk3	Mapk3	Mitogen-activated protein kinase 3	0.0204422	0.345116	2.21451
PATH:04910	Insulin signaling pathway	Pygl	Pygl	Alpha-1,4 glucan phosphorylase	0.0204422	0.345116	2.21451
PATH:04910	Insulin signaling pathway	G6pc2	G6pc2	Glucose-6-phosphatase 2	0.0204422	0.345116	2.21451
PATH:04910	Insulin signaling pathway	Rptor	Rptor	Regulatory-associated protein of mTOR	0.0204422	0.345116	2.21451
PATH:04910	Insulin signaling pathway	Ikbkb	Ikbkb	Inhibitor of nuclear factor kappa-B kinase subunit beta	0.0204422	0.345116	2.21451
PATH:04713	Circadian entrainment	Ryr2	Ryr2	Ryanodine receptor 2	0.0211913	0.345116	2.51329
PATH:04713	Circadian entrainment	Gng8	Gng8	Guanine nucleotide-binding protein G(I)/G(S)/G(O) subunit gamma-8	0.0211913	0.345116	2.51329
PATH:04713	Circadian entrainment	Prkg2	Prkg2	cGMP-dependent protein kinase	0.0211913	0.345116	2.51329
PATH:04713	Circadian entrainment	Gnb4	Gnb4	Guanine nucleotide-binding protein subunit beta-4	0.0211913	0.345116	2.51329
PATH:04713	Circadian entrainment	Adcy9	Adcy9	Adenylate cyclase type 9	0.0211913	0.345116	2.51329
PATH:04713	Circadian entrainment	Creb1	Creb1	Cyclic AMP-responsive element-binding protein 1	0.0211913	0.345116	2.51329
PATH:04713	Circadian entrainment	Mapk3	Mapk3	Mitogen-activated protein kinase 3	0.0211913	0.345116	2.51329
PATH:04723	Retrograde endocannabinoid signaling	Gng8	Gng8	Guanine nucleotide-binding protein G(I)/G(S)/G(O) subunit gamma-8	0.0269833	0.397696	2.39128
PATH:04723	Retrograde endocannabinoid signaling	Gnb4	Gnb4	Guanine nucleotide-binding protein subunit beta-4	0.0269833	0.397696	2.39128
PATH:04723	Retrograde endocannabinoid signaling	Gabrg2	Gabrg2	Gamma-aminobutyric acid receptor subunit gamma-2	0.0269833	0.397696	2.39128
PATH:04723	Retrograde endocannabinoid signaling	Adcy9	Adcy9	Adenylate cyclase type 9	0.0269833	0.397696	2.39128
PATH:04723	Retrograde endocannabinoid signaling	Gabra2	Gabra2	Gamma-aminobutyric acid receptor subunit alpha-2	0.0269833	0.397696	2.39128
PATH:04723	Retrograde endocannabinoid signaling	Mapk3	Mapk3	Mitogen-activated protein kinase 3	0.0269833	0.397696	2.39128
PATH:04723	Retrograde endocannabinoid signaling	Grm1	Grm1	Metabotropic glutamate receptor 1	0.0269833	0.397696	2.39128
PATH:04261	Adrenergic signaling in cardiomyocytes	Cacnb4	Cacnb4	Calcium channel, voltage-dependent, beta 4 subunit	0.0279085	0.397696	2.09718
PATH:04261	Adrenergic signaling in cardiomyocytes	Ryr2	Ryr2	Ryanodine receptor 2	0.0279085	0.397696	2.09718
PATH:04261	Adrenergic signaling in cardiomyocytes	Atp2b1	Atp2b1	Plasma membrane calcium-transporting ATPase 1	0.0279085	0.397696	2.09718
PATH:04261	Adrenergic signaling in cardiomyocytes	Pik3cd	Pik3cd	Phosphatidylinositol 4,5-bisphosphate 3-kinase catalytic subunit delta isoform	0.0279085	0.397696	2.09718
PATH:04261	Adrenergic signaling in cardiomyocytes	Ppp2r1b	Ppp2r1b	Serine/threonine-protein phosphatase 2A 65 kDa regulatory subunit A beta isoform	0.0279085	0.397696	2.09718
PATH:04261	Adrenergic signaling in cardiomyocytes	Adcy9	Adcy9	Adenylate cyclase type 9	0.0279085	0.397696	2.09718
PATH:04261	Adrenergic signaling in cardiomyocytes	Creb1	Creb1	Cyclic AMP-responsive element-binding protein 1	0.0279085	0.397696	2.09718
PATH:04261	Adrenergic signaling in cardiomyocytes	Mapk3	Mapk3	Mitogen-activated protein kinase 3	0.0279085	0.397696	2.09718
PATH:04261	Adrenergic signaling in cardiomyocytes	Rapgef4	Rapgef4	Rapgef4 protein	0.0279085	0.397696	2.09718
PATH:04611	Platelet activation	Prkg2	Prkg2	cGMP-dependent protein kinase	0.0327921	0.402437	2.14877
PATH:04611	Platelet activation	Col3a1	Col3a1	Collagen alpha-1(III) chain	0.0327921	0.402437	2.14877
PATH:04611	Platelet activation	Pik3cd	Pik3cd	Phosphatidylinositol 4,5-bisphosphate 3-kinase catalytic subunit delta isoform	0.0327921	0.402437	2.14877
PATH:04611	Platelet activation	Vwf	Vwf	Vwf protein	0.0327921	0.402437	2.14877
PATH:04611	Platelet activation	Adcy9	Adcy9	Adenylate cyclase type 9	0.0327921	0.402437	2.14877
PATH:04611	Platelet activation	Syk	Syk	Tyrosine-protein kinase SYK	0.0327921	0.402437	2.14877
PATH:04611	Platelet activation	Mapk3	Mapk3	Mitogen-activated protein kinase 3	0.0327921	0.402437	2.14877
PATH:04611	Platelet activation	Tln2	Tln2	Tln2 protein	0.0327921	0.402437	2.14877
PATH:04510	Focal adhesion	Tnr	Tnr	Tenascin-R	0.0346726	0.402437	1.8608
PATH:04510	Focal adhesion	Flnc	Flnc	Filamin-C	0.0346726	0.402437	1.8608
PATH:04510	Focal adhesion	Col3a1	Col3a1	Collagen alpha-1(III) chain	0.0346726	0.402437	1.8608
PATH:04510	Focal adhesion	Met	Met	Met protein	0.0346726	0.402437	1.8608
PATH:04510	Focal adhesion	Pik3cd	Pik3cd	Phosphatidylinositol 4,5-bisphosphate 3-kinase catalytic subunit delta isoform	0.0346726	0.402437	1.8608
PATH:04510	Focal adhesion	Vwf	Vwf	Vwf protein	0.0346726	0.402437	1.8608
PATH:04510	Focal adhesion	Itga8	Itga8	Integrin alpha-8	0.0346726	0.402437	1.8608
PATH:04510	Focal adhesion	Mapk3	Mapk3	Mitogen-activated protein kinase 3	0.0346726	0.402437	1.8608
PATH:04510	Focal adhesion	Egfr	Egfr	Truncated epidermal growth factor receptor	0.0346726	0.402437	1.8608
PATH:04510	Focal adhesion	Birc2	Birc2	Baculoviral IAP repeat-containing protein 2	0.0346726	0.402437	1.8608
PATH:04510	Focal adhesion	Tln2	Tln2	Tln2 protein	0.0346726	0.402437	1.8608
PATH:04921	Oxytocin signaling pathway	Eef2k	Eef2k	Eukaryotic elongation factor 2 kinase	0.0358662	0.402437	2.00427
PATH:04921	Oxytocin signaling pathway	Cacnb4	Cacnb4	Calcium channel, voltage-dependent, beta 4 subunit	0.0358662	0.402437	2.00427
PATH:04921	Oxytocin signaling pathway	Ryr2	Ryr2	Ryanodine receptor 2	0.0358662	0.402437	2.00427
PATH:04921	Oxytocin signaling pathway	Pik3cd	Pik3cd	Phosphatidylinositol 4,5-bisphosphate 3-kinase catalytic subunit delta isoform	0.0358662	0.402437	2.00427
PATH:04921	Oxytocin signaling pathway	Cd38	Cd38	ADP-ribosyl cyclase/cyclic ADP-ribose hydrolase 1	0.0358662	0.402437	2.00427
PATH:04921	Oxytocin signaling pathway	Adcy9	Adcy9	Adenylate cyclase type 9	0.0358662	0.402437	2.00427
PATH:04921	Oxytocin signaling pathway	Camk1d	Camk1d	Calcium/calmodulin-dependent protein kinase ID	0.0358662	0.402437	2.00427
PATH:04921	Oxytocin signaling pathway	Mapk3	Mapk3	Mitogen-activated protein kinase 3	0.0358662	0.402437	2.00427
PATH:04921	Oxytocin signaling pathway	Egfr	Egfr	Truncated epidermal growth factor receptor	0.0358662	0.402437	2.00427
PATH:04360	Axon guidance	Nck2	Nck2	Cytoplasmic protein NCK2	0.0367866	0.402437	2.10066
PATH:04360	Axon guidance	Epha7	Epha7	Receptor protein-tyrosine kinase	0.0367866	0.402437	2.10066
PATH:04360	Axon guidance	Cfl2	Cfl2	Cofilin-2	0.0367866	0.402437	2.10066
PATH:04360	Axon guidance	Ephb2	Ephb2	Receptor protein-tyrosine kinase	0.0367866	0.402437	2.10066
PATH:04360	Axon guidance	Met	Met	Met protein	0.0367866	0.402437	2.10066
PATH:04360	Axon guidance	Epha5	Epha5	Receptor protein-tyrosine kinase	0.0367866	0.402437	2.10066
PATH:04360	Axon guidance	Mapk3	Mapk3	Mitogen-activated protein kinase 3	0.0367866	0.402437	2.10066
PATH:04360	Axon guidance	Cxcr4	Cxcr4	Chemokine receptor 4	0.0367866	0.402437	2.10066
PATH:04660	T cell receptor signaling pathway	Nck2	Nck2	Cytoplasmic protein NCK2	0.0383463	0.402437	2.21894
PATH:04660	T cell receptor signaling pathway	Pdcd1	Pdcd1	Programmed cell death protein 1	0.0383463	0.402437	2.21894
PATH:04660	T cell receptor signaling pathway	Pik3cd	Pik3cd	Phosphatidylinositol 4,5-bisphosphate 3-kinase catalytic subunit delta isoform	0.0383463	0.402437	2.21894
PATH:04660	T cell receptor signaling pathway	Map3k8	Map3k8	Mitogen-activated protein kinase kinase kinase 8	0.0383463	0.402437	2.21894
PATH:04660	T cell receptor signaling pathway	Mapk3	Mapk3	Mitogen-activated protein kinase 3	0.0383463	0.402437	2.21894
PATH:04660	T cell receptor signaling pathway	Tec	Tec	Tyrosine-protein kinase Tec	0.0383463	0.402437	2.21894
PATH:04660	T cell receptor signaling pathway	Ikbkb	Ikbkb	Inhibitor of nuclear factor kappa-B kinase subunit beta	0.0383463	0.402437	2.21894
PATH:04727	GABAergic synapse	Hap1	Hap1	Huntingtin-associated protein 1	0.0405967	0.402437	2.37209
PATH:04727	GABAergic synapse	Gng8	Gng8	Guanine nucleotide-binding protein G(I)/G(S)/G(O) subunit gamma-8	0.0405967	0.402437	2.37209
PATH:04727	GABAergic synapse	Gnb4	Gnb4	Guanine nucleotide-binding protein subunit beta-4	0.0405967	0.402437	2.37209
PATH:04727	GABAergic synapse	Gabrg2	Gabrg2	Gamma-aminobutyric acid receptor subunit gamma-2	0.0405967	0.402437	2.37209
PATH:04727	GABAergic synapse	Adcy9	Adcy9	Adenylate cyclase type 9	0.0405967	0.402437	2.37209
PATH:04727	GABAergic synapse	Gabra2	Gabra2	Gamma-aminobutyric acid receptor subunit alpha-2	0.0405967	0.402437	2.37209
PATH:05215	Prostate cancer	Pik3cd	Pik3cd	Phosphatidylinositol 4,5-bisphosphate 3-kinase catalytic subunit delta isoform	0.0405967	0.402437	2.37209
PATH:05215	Prostate cancer	Srd5a2	Srd5a2	3-oxo-5-alpha-steroid 4-dehydrogenase 2	0.0405967	0.402437	2.37209
PATH:05215	Prostate cancer	Creb1	Creb1	Cyclic AMP-responsive element-binding protein 1	0.0405967	0.402437	2.37209
PATH:05215	Prostate cancer	Mapk3	Mapk3	Mitogen-activated protein kinase 3	0.0405967	0.402437	2.37209
PATH:05215	Prostate cancer	Egfr	Egfr	Truncated epidermal growth factor receptor	0.0405967	0.402437	2.37209
PATH:05215	Prostate cancer	Ikbkb	Ikbkb	Inhibitor of nuclear factor kappa-B kinase subunit beta	0.0405967	0.402437	2.37209
PATH:05212	Pancreatic cancer	Brca2	Brca2	Breast cancer type 2 susceptibility protein homolog	0.0482976	0.426151	2.51329
PATH:05212	Pancreatic cancer	Pik3cd	Pik3cd	Phosphatidylinositol 4,5-bisphosphate 3-kinase catalytic subunit delta isoform	0.0482976	0.426151	2.51329
PATH:05212	Pancreatic cancer	Mapk3	Mapk3	Mitogen-activated protein kinase 3	0.0482976	0.426151	2.51329
PATH:05212	Pancreatic cancer	Egfr	Egfr	Truncated epidermal growth factor receptor	0.0482976	0.426151	2.51329
PATH:05212	Pancreatic cancer	Ikbkb	Ikbkb	Inhibitor of nuclear factor kappa-B kinase subunit beta	0.0482976	0.426151	2.51329
PATH:04919	Thyroid hormone signaling pathway	Rheb	Rheb	RHEB-like protein	0.0505534	0.426151	2.08731
PATH:04919	Thyroid hormone signaling pathway	Pik3cd	Pik3cd	Phosphatidylinositol 4,5-bisphosphate 3-kinase catalytic subunit delta isoform	0.0505534	0.426151	2.08731
PATH:04919	Thyroid hormone signaling pathway	Slco1c1	Slco1c1	Solute carrier organic anion transporter family member 1C1	0.0505534	0.426151	2.08731
PATH:04919	Thyroid hormone signaling pathway	Gata4	Gata4	Transcription factor GATA-4	0.0505534	0.426151	2.08731
PATH:04919	Thyroid hormone signaling pathway	Plce1	Plce1	Phosphoinositide phospholipase C	0.0505534	0.426151	2.08731
PATH:04919	Thyroid hormone signaling pathway	Mapk3	Mapk3	Mitogen-activated protein kinase 3	0.0505534	0.426151	2.08731
PATH:04919	Thyroid hormone signaling pathway	Dio2	Dio2	Type II iodothyronine deiodinase	0.0505534	0.426151	2.08731
PATH:05218	Melanoma	Fgf20	Fgf20	Fibroblast growth factor 20	0.0508076	0.426151	2.47789
PATH:05218	Melanoma	Met	Met	Met protein	0.0508076	0.426151	2.47789
PATH:05218	Melanoma	Pik3cd	Pik3cd	Phosphatidylinositol 4,5-bisphosphate 3-kinase catalytic subunit delta isoform	0.0508076	0.426151	2.47789
PATH:05218	Melanoma	Mapk3	Mapk3	Mitogen-activated protein kinase 3	0.0508076	0.426151	2.47789
PATH:05218	Melanoma	Egfr	Egfr	Truncated epidermal growth factor receptor	0.0508076	0.426151	2.47789
PATH:04520	Adherens junction	Ptprb	Ptprb	Receptor-type tyrosine-protein phosphatase beta	0.0508076	0.426151	2.47789
PATH:04520	Adherens junction	Met	Met	Met protein	0.0508076	0.426151	2.47789
PATH:04520	Adherens junction	Ctnna3	Ctnna3	Alpha-T-catenin isoform X	0.0508076	0.426151	2.47789
PATH:04520	Adherens junction	Mapk3	Mapk3	Mitogen-activated protein kinase 3	0.0508076	0.426151	2.47789
PATH:04520	Adherens junction	Egfr	Egfr	Truncated epidermal growth factor receptor	0.0508076	0.426151	2.47789
PATH:00410	beta-Alanine metabolism	Dpyd	Dpyd	Putative uncharacterized protein	0.0567811	0.426151	3.4051
PATH:00410	beta-Alanine metabolism	Aldh6a1	Aldh6a1	Aldh6a1 protein	0.0567811	0.426151	3.4051
PATH:00410	beta-Alanine metabolism	Srm	Srm	Putative uncharacterized protein	0.0567811	0.426151	3.4051
PATH:05205	Proteoglycans in cancer	Fgf20	Fgf20	Fibroblast growth factor 20	0.0570435	0.426151	1.7126
PATH:05205	Proteoglycans in cancer	Wnt5a	Wnt5a	Protein Wnt-5a	0.0570435	0.426151	1.7126
PATH:05205	Proteoglycans in cancer	Wnt3	Wnt3	Protein Wnt	0.0570435	0.426151	1.7126
PATH:05205	Proteoglycans in cancer	Flnc	Flnc	Filamin-C	0.0570435	0.426151	1.7126
PATH:05205	Proteoglycans in cancer	Met	Met	Met protein	0.0570435	0.426151	1.7126
PATH:05205	Proteoglycans in cancer	Pik3cd	Pik3cd	Phosphatidylinositol 4,5-bisphosphate 3-kinase catalytic subunit delta isoform	0.0570435	0.426151	1.7126
PATH:05205	Proteoglycans in cancer	Plce1	Plce1	Phosphoinositide phospholipase C	0.0570435	0.426151	1.7126
PATH:05205	Proteoglycans in cancer	Mapk3	Mapk3	Mitogen-activated protein kinase 3	0.0570435	0.426151	1.7126
PATH:05205	Proteoglycans in cancer	Wnt11	Wnt11	Protein Wnt-11	0.0570435	0.426151	1.7126
PATH:05205	Proteoglycans in cancer	Egfr	Egfr	Truncated epidermal growth factor receptor	0.0570435	0.426151	1.7126
PATH:05205	Proteoglycans in cancer	Ank3	Ank3	Ankyrin-3	0.0570435	0.426151	1.7126
PATH:04730	Long-term depression	Prkg2	Prkg2	cGMP-dependent protein kinase	0.0587898	0.426151	2.37744
PATH:04730	Long-term depression	Pla2g6	Pla2g6	85/88 kDa calcium-independent phospholipase A2	0.0587898	0.426151	2.37744
PATH:04730	Long-term depression	Ppp2r1b	Ppp2r1b	Serine/threonine-protein phosphatase 2A 65 kDa regulatory subunit A beta isoform	0.0587898	0.426151	2.37744
PATH:04730	Long-term depression	Mapk3	Mapk3	Mitogen-activated protein kinase 3	0.0587898	0.426151	2.37744
PATH:04730	Long-term depression	Grm1	Grm1	Metabotropic glutamate receptor 1	0.0587898	0.426151	2.37744
PATH:05213	Endometrial cancer	Pik3cd	Pik3cd	Phosphatidylinositol 4,5-bisphosphate 3-kinase catalytic subunit delta isoform	0.0595478	0.426151	2.70662
PATH:05213	Endometrial cancer	Ctnna3	Ctnna3	Alpha-T-catenin isoform X	0.0595478	0.426151	2.70662
PATH:05213	Endometrial cancer	Mapk3	Mapk3	Mitogen-activated protein kinase 3	0.0595478	0.426151	2.70662
PATH:05213	Endometrial cancer	Egfr	Egfr	Truncated epidermal growth factor receptor	0.0595478	0.426151	2.70662
PATH:04915	Estrogen signaling pathway	Pik3cd	Pik3cd	Phosphatidylinositol 4,5-bisphosphate 3-kinase catalytic subunit delta isoform	0.059843	0.426151	2.15425
PATH:04915	Estrogen signaling pathway	Adcy9	Adcy9	Adenylate cyclase type 9	0.059843	0.426151	2.15425
PATH:04915	Estrogen signaling pathway	Creb1	Creb1	Cyclic AMP-responsive element-binding protein 1	0.059843	0.426151	2.15425
PATH:04915	Estrogen signaling pathway	Mapk3	Mapk3	Mitogen-activated protein kinase 3	0.059843	0.426151	2.15425
PATH:04915	Estrogen signaling pathway	Grm1	Grm1	Metabotropic glutamate receptor 1	0.059843	0.426151	2.15425
PATH:04915	Estrogen signaling pathway	Egfr	Egfr	Truncated epidermal growth factor receptor	0.059843	0.426151	2.15425
PATH:04340	Hedgehog signaling pathway	Wnt5a	Wnt5a	Protein Wnt-5a	0.0666332	0.426151	2.60637
PATH:04340	Hedgehog signaling pathway	Wnt3	Wnt3	Protein Wnt	0.0666332	0.426151	2.60637
PATH:04340	Hedgehog signaling pathway	Bmp2	Bmp2	Bone morphogenetic protein 2	0.0666332	0.426151	2.60637
PATH:04340	Hedgehog signaling pathway	Wnt11	Wnt11	Protein Wnt-11	0.0666332	0.426151	2.60637
PATH:04110	Cell cycle	Bub1b	Bub1b	Putative uncharacterized protein	0.0672231	0.426151	1.95478
PATH:04110	Cell cycle	Wee2	Wee2	Wee1-like protein kinase 2	0.0672231	0.426151	1.95478
PATH:04110	Cell cycle	Cdc14a	Cdc14a	Dual specificity protein phosphatase CDC14A	0.0672231	0.426151	1.95478
PATH:04110	Cell cycle	Rbl2	Rbl2	Putative uncharacterized protein	0.0672231	0.426151	1.95478
PATH:04110	Cell cycle	Wee1	Wee1	Wee1-like protein kinase	0.0672231	0.426151	1.95478
PATH:04110	Cell cycle	Anapc1	Anapc1	Anaphase-promoting complex subunit 1	0.0672231	0.426151	1.95478
PATH:04110	Cell cycle	Cdkn1c	Cdkn1c	Cyclin-dependent kinase inhibitor 1C (P57), isoform CRA_a	0.0672231	0.426151	1.95478
PATH:04620	Toll-like receptor signaling pathway	Ly96	Ly96	Lymphocyte antigen 96	0.067287	0.426151	2.09026
PATH:04620	Toll-like receptor signaling pathway	Traf3	Traf3	TNF receptor-associated factor 3	0.067287	0.426151	2.09026
PATH:04620	Toll-like receptor signaling pathway	Pik3cd	Pik3cd	Phosphatidylinositol 4,5-bisphosphate 3-kinase catalytic subunit delta isoform	0.067287	0.426151	2.09026
PATH:04620	Toll-like receptor signaling pathway	Map3k8	Map3k8	Mitogen-activated protein kinase kinase kinase 8	0.067287	0.426151	2.09026
PATH:04620	Toll-like receptor signaling pathway	Mapk3	Mapk3	Mitogen-activated protein kinase 3	0.067287	0.426151	2.09026
PATH:04620	Toll-like receptor signaling pathway	Ikbkb	Ikbkb	Inhibitor of nuclear factor kappa-B kinase subunit beta	0.067287	0.426151	2.09026
PATH:04912	GnRH signaling pathway	Pla2g6	Pla2g6	85/88 kDa calcium-independent phospholipase A2	0.067287	0.426151	2.09026
PATH:04912	GnRH signaling pathway	Mmp14	Mmp14	Matrix metalloproteinase-14	0.067287	0.426151	2.09026
PATH:04912	GnRH signaling pathway	Map3k1	Map3k1	Mitogen-activated protein kinase kinase kinase 1	0.067287	0.426151	2.09026
PATH:04912	GnRH signaling pathway	Adcy9	Adcy9	Adenylate cyclase type 9	0.067287	0.426151	2.09026
PATH:04912	GnRH signaling pathway	Mapk3	Mapk3	Mitogen-activated protein kinase 3	0.067287	0.426151	2.09026
PATH:04912	GnRH signaling pathway	Egfr	Egfr	Truncated epidermal growth factor receptor	0.067287	0.426151	2.09026
PATH:05217	Basal cell carcinoma	Wnt5a	Wnt5a	Protein Wnt-5a	0.0703332	0.431113	2.55899
PATH:05217	Basal cell carcinoma	Wnt3	Wnt3	Protein Wnt	0.0703332	0.431113	2.55899
PATH:05217	Basal cell carcinoma	Bmp2	Bmp2	Bone morphogenetic protein 2	0.0703332	0.431113	2.55899
PATH:05217	Basal cell carcinoma	Wnt11	Wnt11	Protein Wnt-11	0.0703332	0.431113	2.55899
PATH:04724	Glutamatergic synapse	Dlgap1	Dlgap1	Disks large-associated protein 1	0.0718522	0.431113	1.92424
PATH:04724	Glutamatergic synapse	Gng8	Gng8	Guanine nucleotide-binding protein G(I)/G(S)/G(O) subunit gamma-8	0.0718522	0.431113	1.92424
PATH:04724	Glutamatergic synapse	Pla2g6	Pla2g6	85/88 kDa calcium-independent phospholipase A2	0.0718522	0.431113	1.92424
PATH:04724	Glutamatergic synapse	Gnb4	Gnb4	Guanine nucleotide-binding protein subunit beta-4	0.0718522	0.431113	1.92424
PATH:04724	Glutamatergic synapse	Adcy9	Adcy9	Adenylate cyclase type 9	0.0718522	0.431113	1.92424
PATH:04724	Glutamatergic synapse	Mapk3	Mapk3	Mitogen-activated protein kinase 3	0.0718522	0.431113	1.92424
PATH:04724	Glutamatergic synapse	Grm1	Grm1	Metabotropic glutamate receptor 1	0.0718522	0.431113	1.92424
PATH:05221	Acute myeloid leukemia	Pik3cd	Pik3cd	Phosphatidylinositol 4,5-bisphosphate 3-kinase catalytic subunit delta isoform	0.0780425	0.449298	2.4692
PATH:05221	Acute myeloid leukemia	Kit	Kit	KIT oncogene	0.0780425	0.449298	2.4692
PATH:05221	Acute myeloid leukemia	Mapk3	Mapk3	Mitogen-activated protein kinase 3	0.0780425	0.449298	2.4692
PATH:05221	Acute myeloid leukemia	Ikbkb	Ikbkb	Inhibitor of nuclear factor kappa-B kinase subunit beta	0.0780425	0.449298	2.4692
PATH:04310	Wnt signaling pathway	Vangl2	Vangl2	Vang-like protein 2	0.080668	0.449298	1.78157
PATH:04310	Wnt signaling pathway	Wnt5a	Wnt5a	Protein Wnt-5a	0.080668	0.449298	1.78157
PATH:04310	Wnt signaling pathway	Chd8	Chd8	Chromodomain-helicase-DNA-binding protein 8	0.080668	0.449298	1.78157
PATH:04310	Wnt signaling pathway	Wif1	Wif1	Wnt inhibitory factor 1	0.080668	0.449298	1.78157
PATH:04310	Wnt signaling pathway	Wnt3	Wnt3	Protein Wnt	0.080668	0.449298	1.78157
PATH:04310	Wnt signaling pathway	Ppp2r1b	Ppp2r1b	Serine/threonine-protein phosphatase 2A 65 kDa regulatory subunit A beta isoform	0.080668	0.449298	1.78157
PATH:04310	Wnt signaling pathway	Wnt11	Wnt11	Protein Wnt-11	0.080668	0.449298	1.78157
PATH:04310	Wnt signaling pathway	Sfrp2	Sfrp2	Secreted frizzled-related protein 2	0.080668	0.449298	1.78157
PATH:03008	Ribosome biogenesis in eukaryotes	Wdr3	Wdr3	WD repeat-containing protein 3	0.0833688	0.449298	2.14549
PATH:03008	Ribosome biogenesis in eukaryotes	Pop7	Pop7	Ribonuclease P protein subunit p20	0.0833688	0.449298	2.14549
PATH:03008	Ribosome biogenesis in eukaryotes	Nop10	Nop10	H/ACA ribonucleoprotein complex subunit 3	0.0833688	0.449298	2.14549
PATH:03008	Ribosome biogenesis in eukaryotes	Imp4	Imp4	U3 small nucleolar ribonucleoprotein protein IMP4	0.0833688	0.449298	2.14549
PATH:03008	Ribosome biogenesis in eukaryotes	Xrn2	Xrn2	5'-3' exoribonuclease 2	0.0833688	0.449298	2.14549
PATH:04972	Pancreatic secretion	Amy2b	Amy2b	Amylase	0.0837225	0.449298	1.97305
PATH:04972	Pancreatic secretion	Ryr2	Ryr2	Ryanodine receptor 2	0.0837225	0.449298	1.97305
PATH:04972	Pancreatic secretion	Atp2b1	Atp2b1	Plasma membrane calcium-transporting ATPase 1	0.0837225	0.449298	1.97305
PATH:04972	Pancreatic secretion	Pla2g6	Pla2g6	85/88 kDa calcium-independent phospholipase A2	0.0837225	0.449298	1.97305
PATH:04972	Pancreatic secretion	Cd38	Cd38	ADP-ribosyl cyclase/cyclic ADP-ribose hydrolase 1	0.0837225	0.449298	1.97305
PATH:04972	Pancreatic secretion	Adcy9	Adcy9	Adenylate cyclase type 9	0.0837225	0.449298	1.97305
PATH:04010	MAPK signaling pathway	Rps6ka2	Rps6ka2	Putative uncharacterized protein	0.0847361	0.449298	1.55805
PATH:04010	MAPK signaling pathway	Fgf20	Fgf20	Fibroblast growth factor 20	0.0847361	0.449298	1.55805
PATH:04010	MAPK signaling pathway	Cacnb4	Cacnb4	Calcium channel, voltage-dependent, beta 4 subunit	0.0847361	0.449298	1.55805
PATH:04010	MAPK signaling pathway	Mecom	Mecom	Evi1 protein	0.0847361	0.449298	1.55805
PATH:04010	MAPK signaling pathway	Flnc	Flnc	Filamin-C	0.0847361	0.449298	1.55805
PATH:04010	MAPK signaling pathway	Pla2g6	Pla2g6	85/88 kDa calcium-independent phospholipase A2	0.0847361	0.449298	1.55805
PATH:04010	MAPK signaling pathway	Ngf	Ngf	Beta-nerve growth factor	0.0847361	0.449298	1.55805
PATH:04010	MAPK signaling pathway	Map3k8	Map3k8	Mitogen-activated protein kinase kinase kinase 8	0.0847361	0.449298	1.55805
PATH:04010	MAPK signaling pathway	Map3k1	Map3k1	Mitogen-activated protein kinase kinase kinase 1	0.0847361	0.449298	1.55805
PATH:04010	MAPK signaling pathway	Mapk3	Mapk3	Mitogen-activated protein kinase 3	0.0847361	0.449298	1.55805
PATH:04010	MAPK signaling pathway	Egfr	Egfr	Truncated epidermal growth factor receptor	0.0847361	0.449298	1.55805
PATH:04010	MAPK signaling pathway	Ikbkb	Ikbkb	Inhibitor of nuclear factor kappa-B kinase subunit beta	0.0847361	0.449298	1.55805
PATH:05016	Huntington's disease	Cox7c	Cox7c	Cytochrome c oxidase subunit 7C, mitochondrial	0.093902	0.458336	1.65798
PATH:05016	Huntington's disease	Hap1	Hap1	Huntingtin-associated protein 1	0.093902	0.458336	1.65798
PATH:05016	Huntington's disease	Dnah1	Dnah1	Protein Dnah1	0.093902	0.458336	1.65798
PATH:05016	Huntington's disease	Dnal4	Dnal4	Dynein, axonemal, light chain 4, isoform CRA_c	0.093902	0.458336	1.65798
PATH:05016	Huntington's disease	Atp5e	Atp5e	ATP synthase subunit epsilon, mitochondrial	0.093902	0.458336	1.65798
PATH:05016	Huntington's disease	Rest	Rest	REST4	0.093902	0.458336	1.65798
PATH:05016	Huntington's disease	Ppargc1a	Ppargc1a	Peroxisome proliferator-activated receptor gamma coactivator 1-alpha	0.093902	0.458336	1.65798
PATH:05016	Huntington's disease	Creb1	Creb1	Cyclic AMP-responsive element-binding protein 1	0.093902	0.458336	1.65798
PATH:05016	Huntington's disease	Grm1	Grm1	Metabotropic glutamate receptor 1	0.093902	0.458336	1.65798
PATH:00562	Inositol phosphate metabolism	Inpp4b	Inpp4b	Type II inositol 3,4-bisphosphate 4-phosphatase	0.0946634	0.458336	2.30728
PATH:00562	Inositol phosphate metabolism	Pik3cd	Pik3cd	Phosphatidylinositol 4,5-bisphosphate 3-kinase catalytic subunit delta isoform	0.0946634	0.458336	2.30728
PATH:00562	Inositol phosphate metabolism	Aldh6a1	Aldh6a1	Aldh6a1 protein	0.0946634	0.458336	2.30728
PATH:00562	Inositol phosphate metabolism	Plce1	Plce1	Phosphoinositide phospholipase C	0.0946634	0.458336	2.30728
PATH:05160	Hepatitis C	Traf3	Traf3	TNF receptor-associated factor 3	0.0949723	0.458336	1.79783
PATH:05160	Hepatitis C	Oas1a	Oas1a	2'-5'-oligoadenylate synthase 1A	0.0949723	0.458336	1.79783
PATH:05160	Hepatitis C	Pik3cd	Pik3cd	Phosphatidylinositol 4,5-bisphosphate 3-kinase catalytic subunit delta isoform	0.0949723	0.458336	1.79783
PATH:05160	Hepatitis C	Ppp2r1b	Ppp2r1b	Serine/threonine-protein phosphatase 2A 65 kDa regulatory subunit A beta isoform	0.0949723	0.458336	1.79783
PATH:05160	Hepatitis C	Mapk3	Mapk3	Mitogen-activated protein kinase 3	0.0949723	0.458336	1.79783
PATH:05160	Hepatitis C	Egfr	Egfr	Truncated epidermal growth factor receptor	0.0949723	0.458336	1.79783
PATH:05160	Hepatitis C	Ikbkb	Ikbkb	Inhibitor of nuclear factor kappa-B kinase subunit beta	0.0949723	0.458336	1.79783
PATH:04114	Oocyte meiosis	Rps6ka2	Rps6ka2	Putative uncharacterized protein	0.0989738	0.458336	1.88497
PATH:04114	Oocyte meiosis	Ppp2r1b	Ppp2r1b	Serine/threonine-protein phosphatase 2A 65 kDa regulatory subunit A beta isoform	0.0989738	0.458336	1.88497
PATH:04114	Oocyte meiosis	Adcy9	Adcy9	Adenylate cyclase type 9	0.0989738	0.458336	1.88497
PATH:04114	Oocyte meiosis	Anapc1	Anapc1	Anaphase-promoting complex subunit 1	0.0989738	0.458336	1.88497
PATH:04114	Oocyte meiosis	Mapk3	Mapk3	Mitogen-activated protein kinase 3	0.0989738	0.458336	1.88497
PATH:04114	Oocyte meiosis	Pgr	Pgr	Progesterone receptor	0.0989738	0.458336	1.88497
PATH:04012	ErbB signaling pathway	Nck2	Nck2	Cytoplasmic protein NCK2	0.1011	0.458336	2.02219
PATH:04012	ErbB signaling pathway	Abl2	Abl2	Abelson tyrosine-protein kinase 2	0.1011	0.458336	2.02219
PATH:04012	ErbB signaling pathway	Pik3cd	Pik3cd	Phosphatidylinositol 4,5-bisphosphate 3-kinase catalytic subunit delta isoform	0.1011	0.458336	2.02219
PATH:04012	ErbB signaling pathway	Mapk3	Mapk3	Mitogen-activated protein kinase 3	0.1011	0.458336	2.02219
PATH:04012	ErbB signaling pathway	Egfr	Egfr	Truncated epidermal growth factor receptor	0.1011	0.458336	2.02219
PATH:04725	Cholinergic synapse	Gng8	Gng8	Guanine nucleotide-binding protein G(I)/G(S)/G(O) subunit gamma-8	0.10219	0.458336	1.86829
PATH:04725	Cholinergic synapse	Gnb4	Gnb4	Guanine nucleotide-binding protein subunit beta-4	0.10219	0.458336	1.86829
PATH:04725	Cholinergic synapse	Pik3cd	Pik3cd	Phosphatidylinositol 4,5-bisphosphate 3-kinase catalytic subunit delta isoform	0.10219	0.458336	1.86829
PATH:04725	Cholinergic synapse	Adcy9	Adcy9	Adenylate cyclase type 9	0.10219	0.458336	1.86829
PATH:04725	Cholinergic synapse	Creb1	Creb1	Cyclic AMP-responsive element-binding protein 1	0.10219	0.458336	1.86829
PATH:04725	Cholinergic synapse	Mapk3	Mapk3	Mitogen-activated protein kinase 3	0.10219	0.458336	1.86829
PATH:04666	Fc gamma R-mediated phagocytosis	Cfl2	Cfl2	Cofilin-2	0.104856	0.458336	1.99921
PATH:04666	Fc gamma R-mediated phagocytosis	Pla2g6	Pla2g6	85/88 kDa calcium-independent phospholipase A2	0.104856	0.458336	1.99921
PATH:04666	Fc gamma R-mediated phagocytosis	Pik3cd	Pik3cd	Phosphatidylinositol 4,5-bisphosphate 3-kinase catalytic subunit delta isoform	0.104856	0.458336	1.99921
PATH:04666	Fc gamma R-mediated phagocytosis	Syk	Syk	Tyrosine-protein kinase SYK	0.104856	0.458336	1.99921
PATH:04666	Fc gamma R-mediated phagocytosis	Mapk3	Mapk3	Mitogen-activated protein kinase 3	0.104856	0.458336	1.99921
PATH:04540	Gap junction	Prkg2	Prkg2	cGMP-dependent protein kinase	0.104856	0.458336	1.99921
PATH:04540	Gap junction	Adcy9	Adcy9	Adenylate cyclase type 9	0.104856	0.458336	1.99921
PATH:04540	Gap junction	Mapk3	Mapk3	Mitogen-activated protein kinase 3	0.104856	0.458336	1.99921
PATH:04540	Gap junction	Grm1	Grm1	Metabotropic glutamate receptor 1	0.104856	0.458336	1.99921
PATH:04540	Gap junction	Egfr	Egfr	Truncated epidermal growth factor receptor	0.104856	0.458336	1.99921
PATH:05414	Dilated cardiomyopathy	Cacnb4	Cacnb4	Calcium channel, voltage-dependent, beta 4 subunit	0.108681	0.458336	1.97674
PATH:05414	Dilated cardiomyopathy	Ryr2	Ryr2	Ryanodine receptor 2	0.108681	0.458336	1.97674
PATH:05414	Dilated cardiomyopathy	Itga8	Itga8	Integrin alpha-8	0.108681	0.458336	1.97674
PATH:05414	Dilated cardiomyopathy	Adcy9	Adcy9	Adenylate cyclase type 9	0.108681	0.458336	1.97674
PATH:05414	Dilated cardiomyopathy	Ttn	Ttn	Titin	0.108681	0.458336	1.97674
PATH:04350	TGF-beta signaling pathway	Ppp2r1b	Ppp2r1b	Serine/threonine-protein phosphatase 2A 65 kDa regulatory subunit A beta isoform	0.108681	0.458336	1.97674
PATH:04350	TGF-beta signaling pathway	Id4	Id4	DNA-binding protein inhibitor ID-4	0.108681	0.458336	1.97674
PATH:04350	TGF-beta signaling pathway	Rbl2	Rbl2	Putative uncharacterized protein	0.108681	0.458336	1.97674
PATH:04350	TGF-beta signaling pathway	Bmp2	Bmp2	Bone morphogenetic protein 2	0.108681	0.458336	1.97674
PATH:04350	TGF-beta signaling pathway	Mapk3	Mapk3	Mitogen-activated protein kinase 3	0.108681	0.458336	1.97674
PATH:00350	Tyrosine metabolism	Mettl2	Mettl2	Methyltransferase-like protein 2	0.109983	0.458336	2.57459
PATH:00350	Tyrosine metabolism	4930438A08Rik	4930438A08Rik	Protein 4930438A08Rik	0.109983	0.458336	2.57459
PATH:00350	Tyrosine metabolism	Dct	Dct	L-dopachrome tautomerase	0.109983	0.458336	2.57459
PATH:04022	cGMP-PKG signaling pathway	Atp2b1	Atp2b1	Plasma membrane calcium-transporting ATPase 1	0.110899	0.458336	1.65581
PATH:04022	cGMP-PKG signaling pathway	Prkg2	Prkg2	cGMP-dependent protein kinase	0.110899	0.458336	1.65581
PATH:04022	cGMP-PKG signaling pathway	Pik3cd	Pik3cd	Phosphatidylinositol 4,5-bisphosphate 3-kinase catalytic subunit delta isoform	0.110899	0.458336	1.65581
PATH:04022	cGMP-PKG signaling pathway	Adcy9	Adcy9	Adenylate cyclase type 9	0.110899	0.458336	1.65581
PATH:04022	cGMP-PKG signaling pathway	Gata4	Gata4	Transcription factor GATA-4	0.110899	0.458336	1.65581
PATH:04022	cGMP-PKG signaling pathway	Creb1	Creb1	Cyclic AMP-responsive element-binding protein 1	0.110899	0.458336	1.65581
PATH:04022	cGMP-PKG signaling pathway	Pde3b	Pde3b	cGMP-inhibited 3',5'-cyclic phosphodiesterase B	0.110899	0.458336	1.65581
PATH:04022	cGMP-PKG signaling pathway	Mapk3	Mapk3	Mitogen-activated protein kinase 3	0.110899	0.458336	1.65581
PATH:04512	ECM-receptor interaction	Tnr	Tnr	Tenascin-R	0.112574	0.458336	1.95478
PATH:04512	ECM-receptor interaction	Npnt	Npnt	Nephronectin	0.112574	0.458336	1.95478
PATH:04512	ECM-receptor interaction	Col3a1	Col3a1	Collagen alpha-1(III) chain	0.112574	0.458336	1.95478
PATH:04512	ECM-receptor interaction	Vwf	Vwf	Vwf protein	0.112574	0.458336	1.95478
PATH:04512	ECM-receptor interaction	Itga8	Itga8	Integrin alpha-8	0.112574	0.458336	1.95478
PATH:04320	Dorso-ventral axis formation	Mapk3	Mapk3	Mitogen-activated protein kinase 3	0.128228	0.505835	3.19873
PATH:04320	Dorso-ventral axis formation	Egfr	Egfr	Truncated epidermal growth factor receptor	0.128228	0.505835	3.19873
PATH:04960	Aldosterone-regulated sodium reabsorption	Pik3cd	Pik3cd	Phosphatidylinositol 4,5-bisphosphate 3-kinase catalytic subunit delta isoform	0.128677	0.505835	2.39905
PATH:04960	Aldosterone-regulated sodium reabsorption	Mapk3	Mapk3	Mitogen-activated protein kinase 3	0.128677	0.505835	2.39905
PATH:04960	Aldosterone-regulated sodium reabsorption	Scnn1a	Scnn1a	Amiloride-sensitive sodium channel subunit alpha	0.128677	0.505835	2.39905
PATH:00601	Glycosphingolipid biosynthesis - lacto and neolacto series	B3galt1	B3galt1	Beta-1,3-galactosyltransferase 1	0.147785	0.542794	2.93217
PATH:00601	Glycosphingolipid biosynthesis - lacto and neolacto series	Fut9	Fut9	Alpha-(1,3)-fucosyltransferase 9	0.147785	0.542794	2.93217
PATH:05211	Renal cell carcinoma	Met	Met	Met protein	0.147881	0.542794	1.95478
PATH:05211	Renal cell carcinoma	Pik3cd	Pik3cd	Phosphatidylinositol 4,5-bisphosphate 3-kinase catalytic subunit delta isoform	0.147881	0.542794	1.95478
PATH:05211	Renal cell carcinoma	Vhl	Vhl	Von Hippel-Lindau disease tumor suppressor	0.147881	0.542794	1.95478
PATH:05211	Renal cell carcinoma	Mapk3	Mapk3	Mitogen-activated protein kinase 3	0.147881	0.542794	1.95478
PATH:04380	Osteoclast differentiation	Pik3cd	Pik3cd	Phosphatidylinositol 4,5-bisphosphate 3-kinase catalytic subunit delta isoform	0.152711	0.542794	1.66233
PATH:04380	Osteoclast differentiation	Creb1	Creb1	Cyclic AMP-responsive element-binding protein 1	0.152711	0.542794	1.66233
PATH:04380	Osteoclast differentiation	Syk	Syk	Tyrosine-protein kinase SYK	0.152711	0.542794	1.66233
PATH:04380	Osteoclast differentiation	Mapk3	Mapk3	Mitogen-activated protein kinase 3	0.152711	0.542794	1.66233
PATH:04380	Osteoclast differentiation	Tec	Tec	Tyrosine-protein kinase Tec	0.152711	0.542794	1.66233
PATH:04380	Osteoclast differentiation	Ikbkb	Ikbkb	Inhibitor of nuclear factor kappa-B kinase subunit beta	0.152711	0.542794	1.66233
PATH:05220	Chronic myeloid leukemia	Mecom	Mecom	Evi1 protein	0.153204	0.542794	1.928
PATH:05220	Chronic myeloid leukemia	Pik3cd	Pik3cd	Phosphatidylinositol 4,5-bisphosphate 3-kinase catalytic subunit delta isoform	0.153204	0.542794	1.928
PATH:05220	Chronic myeloid leukemia	Mapk3	Mapk3	Mitogen-activated protein kinase 3	0.153204	0.542794	1.928
PATH:05220	Chronic myeloid leukemia	Ikbkb	Ikbkb	Inhibitor of nuclear factor kappa-B kinase subunit beta	0.153204	0.542794	1.928
PATH:04064	NF-kappa B signaling pathway	Ly96	Ly96	Lymphocyte antigen 96	0.154996	0.542794	1.7593
PATH:04064	NF-kappa B signaling pathway	Traf3	Traf3	TNF receptor-associated factor 3	0.154996	0.542794	1.7593
PATH:04064	NF-kappa B signaling pathway	Syk	Syk	Tyrosine-protein kinase SYK	0.154996	0.542794	1.7593
PATH:04064	NF-kappa B signaling pathway	Birc2	Birc2	Baculoviral IAP repeat-containing protein 2	0.154996	0.542794	1.7593
PATH:04064	NF-kappa B signaling pathway	Ikbkb	Ikbkb	Inhibitor of nuclear factor kappa-B kinase subunit beta	0.154996	0.542794	1.7593
PATH:00520	Amino sugar and nucleotide sugar metabolism	Fpgt	Fpgt	Protein Fpgt	0.155189	0.542794	2.19913
PATH:00520	Amino sugar and nucleotide sugar metabolism	Cyb5r1	Cyb5r1	NADH-cytochrome b5 reductase 1	0.155189	0.542794	2.19913
PATH:00520	Amino sugar and nucleotide sugar metabolism	Pgm1	Pgm1	Phosphoglucomutase-2	0.155189	0.542794	2.19913
PATH:00563	Glycosylphosphatidylinositol(GPI)-anchor biosynthesis	Pigm	Pigm	GPI mannosyltransferase 1	0.157779	0.542794	2.81488
PATH:00563	Glycosylphosphatidylinositol(GPI)-anchor biosynthesis	Pgap1	Pgap1	Putative uncharacterized protein	0.157779	0.542794	2.81488
PATH:05412	Arrhythmogenic right ventricular cardiomyopathy (ARVC)	Cacnb4	Cacnb4	Calcium channel, voltage-dependent, beta 4 subunit	0.158599	0.542794	1.90195
PATH:05412	Arrhythmogenic right ventricular cardiomyopathy (ARVC)	Ryr2	Ryr2	Ryanodine receptor 2	0.158599	0.542794	1.90195
PATH:05412	Arrhythmogenic right ventricular cardiomyopathy (ARVC)	Itga8	Itga8	Integrin alpha-8	0.158599	0.542794	1.90195
PATH:05412	Arrhythmogenic right ventricular cardiomyopathy (ARVC)	Ctnna3	Ctnna3	Alpha-T-catenin isoform X	0.158599	0.542794	1.90195
PATH:04020	Calcium signaling pathway	P2rx3	P2rx3	P2X purinoceptor 3	0.159505	0.542794	1.51338
PATH:04020	Calcium signaling pathway	Ryr2	Ryr2	Ryanodine receptor 2	0.159505	0.542794	1.51338
PATH:04020	Calcium signaling pathway	Atp2b1	Atp2b1	Plasma membrane calcium-transporting ATPase 1	0.159505	0.542794	1.51338
PATH:04020	Calcium signaling pathway	Cd38	Cd38	ADP-ribosyl cyclase/cyclic ADP-ribose hydrolase 1	0.159505	0.542794	1.51338
PATH:04020	Calcium signaling pathway	Adcy9	Adcy9	Adenylate cyclase type 9	0.159505	0.542794	1.51338
PATH:04020	Calcium signaling pathway	Plce1	Plce1	Phosphoinositide phospholipase C	0.159505	0.542794	1.51338
PATH:04020	Calcium signaling pathway	Grm1	Grm1	Metabotropic glutamate receptor 1	0.159505	0.542794	1.51338
PATH:04020	Calcium signaling pathway	Egfr	Egfr	Truncated epidermal growth factor receptor	0.159505	0.542794	1.51338
PATH:05145	Toxoplasmosis	Ly96	Ly96	Lymphocyte antigen 96	0.168887	0.554777	1.61157
PATH:05145	Toxoplasmosis	Pla2g6	Pla2g6	85/88 kDa calcium-independent phospholipase A2	0.168887	0.554777	1.61157
PATH:05145	Toxoplasmosis	Pik3cd	Pik3cd	Phosphatidylinositol 4,5-bisphosphate 3-kinase catalytic subunit delta isoform	0.168887	0.554777	1.61157
PATH:05145	Toxoplasmosis	Mapk3	Mapk3	Mitogen-activated protein kinase 3	0.168887	0.554777	1.61157
PATH:05145	Toxoplasmosis	Birc2	Birc2	Baculoviral IAP repeat-containing protein 2	0.168887	0.554777	1.61157
PATH:05145	Toxoplasmosis	Ikbkb	Ikbkb	Inhibitor of nuclear factor kappa-B kinase subunit beta	0.168887	0.554777	1.61157
PATH:04930	Type II diabetes mellitus	Pik3cd	Pik3cd	Phosphatidylinositol 4,5-bisphosphate 3-kinase catalytic subunit delta isoform	0.169037	0.554777	2.11116
PATH:04930	Type II diabetes mellitus	Mapk3	Mapk3	Mitogen-activated protein kinase 3	0.169037	0.554777	2.11116
PATH:04930	Type II diabetes mellitus	Ikbkb	Ikbkb	Inhibitor of nuclear factor kappa-B kinase subunit beta	0.169037	0.554777	2.11116
PATH:05166	HTLV-I infection	Wnt5a	Wnt5a	Protein Wnt-5a	0.173148	0.554777	1.38231
PATH:05166	HTLV-I infection	Bub1b	Bub1b	Putative uncharacterized protein	0.173148	0.554777	1.38231
PATH:05166	HTLV-I infection	Wnt3	Wnt3	Protein Wnt	0.173148	0.554777	1.38231
PATH:05166	HTLV-I infection	Pik3cd	Pik3cd	Phosphatidylinositol 4,5-bisphosphate 3-kinase catalytic subunit delta isoform	0.173148	0.554777	1.38231
PATH:05166	HTLV-I infection	Map3k1	Map3k1	Mitogen-activated protein kinase kinase kinase 1	0.173148	0.554777	1.38231
PATH:05166	HTLV-I infection	Adcy9	Adcy9	Adenylate cyclase type 9	0.173148	0.554777	1.38231
PATH:05166	HTLV-I infection	Anapc1	Anapc1	Anaphase-promoting complex subunit 1	0.173148	0.554777	1.38231
PATH:05166	HTLV-I infection	Creb1	Creb1	Cyclic AMP-responsive element-binding protein 1	0.173148	0.554777	1.38231
PATH:05166	HTLV-I infection	Wnt11	Wnt11	Protein Wnt-11	0.173148	0.554777	1.38231
PATH:05166	HTLV-I infection	Tln2	Tln2	Tln2 protein	0.173148	0.554777	1.38231
PATH:05166	HTLV-I infection	Ikbkb	Ikbkb	Inhibitor of nuclear factor kappa-B kinase subunit beta	0.173148	0.554777	1.38231
PATH:04970	Salivary secretion	Atp2b1	Atp2b1	Plasma membrane calcium-transporting ATPase 1	0.175193	0.554777	1.82785
PATH:04970	Salivary secretion	Prkg2	Prkg2	cGMP-dependent protein kinase	0.175193	0.554777	1.82785
PATH:04970	Salivary secretion	Cd38	Cd38	ADP-ribosyl cyclase/cyclic ADP-ribose hydrolase 1	0.175193	0.554777	1.82785
PATH:04970	Salivary secretion	Adcy9	Adcy9	Adenylate cyclase type 9	0.175193	0.554777	1.82785
PATH:04662	B cell receptor signaling pathway	Pik3cd	Pik3cd	Phosphatidylinositol 4,5-bisphosphate 3-kinase catalytic subunit delta isoform	0.175193	0.554777	1.82785
PATH:04662	B cell receptor signaling pathway	Syk	Syk	Tyrosine-protein kinase SYK	0.175193	0.554777	1.82785
PATH:04662	B cell receptor signaling pathway	Mapk3	Mapk3	Mitogen-activated protein kinase 3	0.175193	0.554777	1.82785
PATH:04662	B cell receptor signaling pathway	Ikbkb	Ikbkb	Inhibitor of nuclear factor kappa-B kinase subunit beta	0.175193	0.554777	1.82785
PATH:03060	Protein export	Sec11c	Sec11c	Signal peptidase complex catalytic subunit SEC11C	0.178118	0.556314	2.60637
PATH:03060	Protein export	Srp19	Srp19	Signal recognition particle 19 kDa protein	0.178118	0.556314	2.60637
PATH:00400	Phenylalanine, tyrosine and tryptophan biosynthesis	4930438A08Rik	4930438A08Rik	Protein 4930438A08Rik	0.182828	0.559719	5.02658
PATH:04722	Neurotrophin signaling pathway	Rps6ka2	Rps6ka2	Putative uncharacterized protein	0.18575	0.559719	1.56382
PATH:04722	Neurotrophin signaling pathway	Pik3cd	Pik3cd	Phosphatidylinositol 4,5-bisphosphate 3-kinase catalytic subunit delta isoform	0.18575	0.559719	1.56382
PATH:04722	Neurotrophin signaling pathway	Ngf	Ngf	Beta-nerve growth factor	0.18575	0.559719	1.56382
PATH:04722	Neurotrophin signaling pathway	Map3k1	Map3k1	Mitogen-activated protein kinase kinase kinase 1	0.18575	0.559719	1.56382
PATH:04722	Neurotrophin signaling pathway	Mapk3	Mapk3	Mitogen-activated protein kinase 3	0.18575	0.559719	1.56382
PATH:04722	Neurotrophin signaling pathway	Ikbkb	Ikbkb	Inhibitor of nuclear factor kappa-B kinase subunit beta	0.18575	0.559719	1.56382
PATH:05100	Bacterial invasion of epithelial cells	Met	Met	Met protein	0.186573	0.559719	1.78157
PATH:05100	Bacterial invasion of epithelial cells	Pik3cd	Pik3cd	Phosphatidylinositol 4,5-bisphosphate 3-kinase catalytic subunit delta isoform	0.186573	0.559719	1.78157
PATH:05100	Bacterial invasion of epithelial cells	Ctnna3	Ctnna3	Alpha-T-catenin isoform X	0.186573	0.559719	1.78157
PATH:05100	Bacterial invasion of epithelial cells	Sept12	Sept12	Sept12 protein	0.186573	0.559719	1.78157
PATH:00500	Starch and sucrose metabolism	Pygl	Pygl	Alpha-1,4 glucan phosphorylase	0.190438	0.563894	1.99166
PATH:00500	Starch and sucrose metabolism	G6pc2	G6pc2	Glucose-6-phosphatase 2	0.190438	0.563894	1.99166
PATH:00500	Starch and sucrose metabolism	Pgm1	Pgm1	Phosphoglucomutase-2	0.190438	0.563894	1.99166
PATH:00030	Pentose phosphate pathway	Tkt	Tkt	Transketolase	0.198831	0.56995	2.42662
PATH:00030	Pentose phosphate pathway	Pgm1	Pgm1	Phosphoglucomutase-2	0.198831	0.56995	2.42662
PATH:05203	Viral carcinogenesis	Pmaip1	Pmaip1	Phorbol-12-myristate-13-acetate-induced protein 1	0.200578	0.56995	1.38892
PATH:05203	Viral carcinogenesis	Traf3	Traf3	TNF receptor-associated factor 3	0.200578	0.56995	1.38892
PATH:05203	Viral carcinogenesis	Dnaja3	Dnaja3	DnaJ (Hsp40) homolog, subfamily A, member 3, isoform CRA_b	0.200578	0.56995	1.38892
PATH:05203	Viral carcinogenesis	Pik3cd	Pik3cd	Phosphatidylinositol 4,5-bisphosphate 3-kinase catalytic subunit delta isoform	0.200578	0.56995	1.38892
PATH:05203	Viral carcinogenesis	Rbl2	Rbl2	Putative uncharacterized protein	0.200578	0.56995	1.38892
PATH:05203	Viral carcinogenesis	Hdac4	Hdac4	Histone deacetylase 4	0.200578	0.56995	1.38892
PATH:05203	Viral carcinogenesis	Creb1	Creb1	Cyclic AMP-responsive element-binding protein 1	0.200578	0.56995	1.38892
PATH:05203	Viral carcinogenesis	Syk	Syk	Tyrosine-protein kinase SYK	0.200578	0.56995	1.38892
PATH:05203	Viral carcinogenesis	Mapk3	Mapk3	Mitogen-activated protein kinase 3	0.200578	0.56995	1.38892
PATH:04066	HIF-1 signaling pathway	Edn1	Edn1	Endothelin-1	0.202978	0.56995	1.59937
PATH:04066	HIF-1 signaling pathway	Pik3cd	Pik3cd	Phosphatidylinositol 4,5-bisphosphate 3-kinase catalytic subunit delta isoform	0.202978	0.56995	1.59937
PATH:04066	HIF-1 signaling pathway	Vhl	Vhl	Von Hippel-Lindau disease tumor suppressor	0.202978	0.56995	1.59937
PATH:04066	HIF-1 signaling pathway	Mapk3	Mapk3	Mitogen-activated protein kinase 3	0.202978	0.56995	1.59937
PATH:04066	HIF-1 signaling pathway	Egfr	Egfr	Truncated epidermal growth factor receptor	0.202978	0.56995	1.59937
PATH:04120	Ubiquitin mediated proteolysis	Mid1	Mid1	E3 ubiquitin-protein ligase Midline-1	0.207712	0.56995	1.50797
PATH:04120	Ubiquitin mediated proteolysis	Ube2q2	Ube2q2	Ubiquitin-conjugating enzyme E2 Q2	0.207712	0.56995	1.50797
PATH:04120	Ubiquitin mediated proteolysis	Vhl	Vhl	Von Hippel-Lindau disease tumor suppressor	0.207712	0.56995	1.50797
PATH:04120	Ubiquitin mediated proteolysis	Map3k1	Map3k1	Mitogen-activated protein kinase kinase kinase 1	0.207712	0.56995	1.50797
PATH:04120	Ubiquitin mediated proteolysis	Anapc1	Anapc1	Anaphase-promoting complex subunit 1	0.207712	0.56995	1.50797
PATH:04120	Ubiquitin mediated proteolysis	Birc2	Birc2	Baculoviral IAP repeat-containing protein 2	0.207712	0.56995	1.50797
PATH:05216	Thyroid cancer	Tfg	Tfg	Protein Tfg	0.209294	0.56995	2.34574
PATH:05216	Thyroid cancer	Mapk3	Mapk3	Mitogen-activated protein kinase 3	0.209294	0.56995	2.34574
PATH:04664	Fc epsilon RI signaling pathway	Pla2g6	Pla2g6	85/88 kDa calcium-independent phospholipase A2	0.210014	0.56995	1.69571
PATH:04664	Fc epsilon RI signaling pathway	Pik3cd	Pik3cd	Phosphatidylinositol 4,5-bisphosphate 3-kinase catalytic subunit delta isoform	0.210014	0.56995	1.69571
PATH:04664	Fc epsilon RI signaling pathway	Syk	Syk	Tyrosine-protein kinase SYK	0.210014	0.56995	1.69571
PATH:04664	Fc epsilon RI signaling pathway	Mapk3	Mapk3	Mitogen-activated protein kinase 3	0.210014	0.56995	1.69571
PATH:00480	Glutathione metabolism	Lap3	Lap3	Cytosol aminopeptidase	0.212481	0.56995	1.88497
PATH:00480	Glutathione metabolism	Gsta3	Gsta3	Glutathione S-transferase A3	0.212481	0.56995	1.88497
PATH:00480	Glutathione metabolism	Srm	Srm	Putative uncharacterized protein	0.212481	0.56995	1.88497
PATH:05223	Non-small cell lung cancer	Pik3cd	Pik3cd	Phosphatidylinositol 4,5-bisphosphate 3-kinase catalytic subunit delta isoform	0.212481	0.56995	1.88497
PATH:05223	Non-small cell lung cancer	Mapk3	Mapk3	Mitogen-activated protein kinase 3	0.212481	0.56995	1.88497
PATH:05223	Non-small cell lung cancer	Egfr	Egfr	Truncated epidermal growth factor receptor	0.212481	0.56995	1.88497
PATH:05410	Hypertrophic cardiomyopathy (HCM)	Cacnb4	Cacnb4	Calcium channel, voltage-dependent, beta 4 subunit	0.216002	0.572656	1.67553
PATH:05410	Hypertrophic cardiomyopathy (HCM)	Ryr2	Ryr2	Ryanodine receptor 2	0.216002	0.572656	1.67553
PATH:05410	Hypertrophic cardiomyopathy (HCM)	Itga8	Itga8	Integrin alpha-8	0.216002	0.572656	1.67553
PATH:05410	Hypertrophic cardiomyopathy (HCM)	Ttn	Ttn	Titin	0.216002	0.572656	1.67553
PATH:00052	Galactose metabolism	G6pc2	G6pc2	Glucose-6-phosphatase 2	0.230374	0.595441	2.19913
PATH:00052	Galactose metabolism	Pgm1	Pgm1	Phosphoglucomutase-2	0.230374	0.595441	2.19913
PATH:04911	Insulin secretion	Ryr2	Ryr2	Ryanodine receptor 2	0.234237	0.595441	1.61775
PATH:04911	Insulin secretion	Adcy9	Adcy9	Adenylate cyclase type 9	0.234237	0.595441	1.61775
PATH:04911	Insulin secretion	Creb1	Creb1	Cyclic AMP-responsive element-binding protein 1	0.234237	0.595441	1.61775
PATH:04911	Insulin secretion	Rapgef4	Rapgef4	Rapgef4 protein	0.234237	0.595441	1.61775
PATH:04210	Apoptosis	Pik3cd	Pik3cd	Phosphatidylinositol 4,5-bisphosphate 3-kinase catalytic subunit delta isoform	0.234237	0.595441	1.61775
PATH:04210	Apoptosis	Ngf	Ngf	Beta-nerve growth factor	0.234237	0.595441	1.61775
PATH:04210	Apoptosis	Birc2	Birc2	Baculoviral IAP repeat-containing protein 2	0.234237	0.595441	1.61775
PATH:04210	Apoptosis	Ikbkb	Ikbkb	Inhibitor of nuclear factor kappa-B kinase subunit beta	0.234237	0.595441	1.61775
PATH:00330	Arginine and proline metabolism	Sat2	Sat2	Putative uncharacterized protein	0.235042	0.595441	1.78912
PATH:00330	Arginine and proline metabolism	Lap3	Lap3	Cytosol aminopeptidase	0.235042	0.595441	1.78912
PATH:00330	Arginine and proline metabolism	Srm	Srm	Putative uncharacterized protein	0.235042	0.595441	1.78912
PATH:04974	Protein digestion and absorption	Dpp4	Dpp4	Dipeptidyl peptidase 4	0.246597	0.60786	1.5814
PATH:04974	Protein digestion and absorption	Mep1a	Mep1a	Meprin A subunit alpha	0.246597	0.60786	1.5814
PATH:04974	Protein digestion and absorption	Slc1a5	Slc1a5	Neutral amino acid transporter B(0)	0.246597	0.60786	1.5814
PATH:04974	Protein digestion and absorption	Col3a1	Col3a1	Collagen alpha-1(III) chain	0.246597	0.60786	1.5814
PATH:05222	Small cell lung cancer	Traf3	Traf3	TNF receptor-associated factor 3	0.246597	0.60786	1.5814
PATH:05222	Small cell lung cancer	Pik3cd	Pik3cd	Phosphatidylinositol 4,5-bisphosphate 3-kinase catalytic subunit delta isoform	0.246597	0.60786	1.5814
PATH:05222	Small cell lung cancer	Birc2	Birc2	Baculoviral IAP repeat-containing protein 2	0.246597	0.60786	1.5814
PATH:05222	Small cell lung cancer	Ikbkb	Ikbkb	Inhibitor of nuclear factor kappa-B kinase subunit beta	0.246597	0.60786	1.5814
PATH:04621	NOD-like receptor signaling pathway	Mapk3	Mapk3	Mitogen-activated protein kinase 3	0.250312	0.60786	1.73046
PATH:04621	NOD-like receptor signaling pathway	Birc2	Birc2	Baculoviral IAP repeat-containing protein 2	0.250312	0.60786	1.73046
PATH:04621	NOD-like receptor signaling pathway	Ikbkb	Ikbkb	Inhibitor of nuclear factor kappa-B kinase subunit beta	0.250312	0.60786	1.73046
PATH:00130	Ubiquinone and other terpenoid-quinone biosynthesis	Coq3	Coq3	Putative uncharacterized protein	0.250609	0.60786	3.5186
PATH:05214	Glioma	Pik3cd	Pik3cd	Phosphatidylinositol 4,5-bisphosphate 3-kinase catalytic subunit delta isoform	0.28125	0.675	1.62397
PATH:05214	Glioma	Mapk3	Mapk3	Mitogen-activated protein kinase 3	0.28125	0.675	1.62397
PATH:05214	Glioma	Egfr	Egfr	Truncated epidermal growth factor receptor	0.28125	0.675	1.62397
PATH:04622	RIG-I-like receptor signaling pathway	Traf3	Traf3	TNF receptor-associated factor 3	0.304678	0.718733	1.55233
PATH:04622	RIG-I-like receptor signaling pathway	Map3k1	Map3k1	Mitogen-activated protein kinase kinase kinase 1	0.304678	0.718733	1.55233
PATH:04622	RIG-I-like receptor signaling pathway	Ikbkb	Ikbkb	Inhibitor of nuclear factor kappa-B kinase subunit beta	0.304678	0.718733	1.55233
PATH:04720	Long-term potentiation	Rps6ka2	Rps6ka2	Putative uncharacterized protein	0.312511	0.718733	1.52983
PATH:04720	Long-term potentiation	Mapk3	Mapk3	Mitogen-activated protein kinase 3	0.312511	0.718733	1.52983
PATH:04720	Long-term potentiation	Grm1	Grm1	Metabotropic glutamate receptor 1	0.312511	0.718733	1.52983
PATH:00290	Valine, leucine and isoleucine biosynthesis	Lars	Lars	MKIAA1352 protein	0.312792	0.718733	2.70662
PATH:03450	Non-homologous end-joining	Lig4	Lig4	DNA ligase 4	0.312792	0.718733	2.70662
PATH:05033	Nicotine addiction	Gabrg2	Gabrg2	Gamma-aminobutyric acid receptor subunit gamma-2	0.315234	0.718733	1.7593
PATH:05033	Nicotine addiction	Gabra2	Gabra2	Gamma-aminobutyric acid receptor subunit alpha-2	0.315234	0.718733	1.7593
PATH:05142	Chagas disease (American trypanosomiasis)	Pik3cd	Pik3cd	Phosphatidylinositol 4,5-bisphosphate 3-kinase catalytic subunit delta isoform	0.336071	0.733243	1.36645
PATH:05142	Chagas disease (American trypanosomiasis)	Ppp2r1b	Ppp2r1b	Serine/threonine-protein phosphatase 2A 65 kDa regulatory subunit A beta isoform	0.336071	0.733243	1.36645
PATH:05142	Chagas disease (American trypanosomiasis)	Mapk3	Mapk3	Mitogen-activated protein kinase 3	0.336071	0.733243	1.36645
PATH:05142	Chagas disease (American trypanosomiasis)	Ikbkb	Ikbkb	Inhibitor of nuclear factor kappa-B kinase subunit beta	0.336071	0.733243	1.36645
PATH:05219	Bladder cancer	Mapk3	Mapk3	Mitogen-activated protein kinase 3	0.336243	0.733243	1.67553
PATH:05219	Bladder cancer	Egfr	Egfr	Truncated epidermal growth factor receptor	0.336243	0.733243	1.67553
PATH:05034	Alcoholism	H3f3b	H3f3b	H3 histone, family 3B	0.336952	0.733243	1.2377
PATH:05034	Alcoholism	Gng8	Gng8	Guanine nucleotide-binding protein G(I)/G(S)/G(O) subunit gamma-8	0.336952	0.733243	1.2377
PATH:05034	Alcoholism	Gnb4	Gnb4	Guanine nucleotide-binding protein subunit beta-4	0.336952	0.733243	1.2377
PATH:05034	Alcoholism	Npy	Npy	Pro-neuropeptide Y	0.336952	0.733243	1.2377
PATH:05034	Alcoholism	Hdac4	Hdac4	Histone deacetylase 4	0.336952	0.733243	1.2377
PATH:05034	Alcoholism	Creb1	Creb1	Cyclic AMP-responsive element-binding protein 1	0.336952	0.733243	1.2377
PATH:05034	Alcoholism	Mapk3	Mapk3	Mitogen-activated protein kinase 3	0.336952	0.733243	1.2377
PATH:04530	Tight junction	Ppp2r1b	Ppp2r1b	Serine/threonine-protein phosphatase 2A 65 kDa regulatory subunit A beta isoform	0.338482	0.733243	1.30319
PATH:04530	Tight junction	Tjp2	Tjp2	Tight junction protein ZO-2	0.338482	0.733243	1.30319
PATH:04530	Tight junction	Myh13	Myh13	Protein Myh13	0.338482	0.733243	1.30319
PATH:04530	Tight junction	Ctnna3	Ctnna3	Alpha-T-catenin isoform X	0.338482	0.733243	1.30319
PATH:04530	Tight junction	Exoc4	Exoc4	Exocyst complex component 4	0.338482	0.733243	1.30319
PATH:04062	Chemokine signaling pathway	Gng8	Gng8	Guanine nucleotide-binding protein G(I)/G(S)/G(O) subunit gamma-8	0.341595	0.733243	1.23151
PATH:04062	Chemokine signaling pathway	Gnb4	Gnb4	Guanine nucleotide-binding protein subunit beta-4	0.341595	0.733243	1.23151
PATH:04062	Chemokine signaling pathway	Pik3cd	Pik3cd	Phosphatidylinositol 4,5-bisphosphate 3-kinase catalytic subunit delta isoform	0.341595	0.733243	1.23151
PATH:04062	Chemokine signaling pathway	Adcy9	Adcy9	Adenylate cyclase type 9	0.341595	0.733243	1.23151
PATH:04062	Chemokine signaling pathway	Mapk3	Mapk3	Mitogen-activated protein kinase 3	0.341595	0.733243	1.23151
PATH:04062	Chemokine signaling pathway	Cxcr4	Cxcr4	Chemokine receptor 4	0.341595	0.733243	1.23151
PATH:04062	Chemokine signaling pathway	Ikbkb	Ikbkb	Inhibitor of nuclear factor kappa-B kinase subunit beta	0.341595	0.733243	1.23151
PATH:00270	Cysteine and methionine metabolism	4930438A08Rik	4930438A08Rik	Protein 4930438A08Rik	0.346678	0.733243	1.63656
PATH:00270	Cysteine and methionine metabolism	Srm	Srm	Putative uncharacterized protein	0.346678	0.733243	1.63656
PATH:00604	Glycosphingolipid biosynthesis - ganglio series	St8sia5	St8sia5	Alpha-2,8-sialyltransferase 8E	0.351366	0.733243	2.34574
PATH:00603	Glycosphingolipid biosynthesis - globo series	Fut9	Fut9	Alpha-(1,3)-fucosyltransferase 9	0.351366	0.733243	2.34574
PATH:05133	Pertussis	Ly96	Ly96	Lymphocyte antigen 96	0.351693	0.733243	1.42646
PATH:05133	Pertussis	Cfl2	Cfl2	Cofilin-2	0.351693	0.733243	1.42646
PATH:05133	Pertussis	Mapk3	Mapk3	Mitogen-activated protein kinase 3	0.351693	0.733243	1.42646
PATH:04962	Vasopressin-regulated water reabsorption	Adcy9	Adcy9	Adenylate cyclase type 9	0.357059	0.733243	1.59937
PATH:04962	Vasopressin-regulated water reabsorption	Creb1	Creb1	Cyclic AMP-responsive element-binding protein 1	0.357059	0.733243	1.59937
PATH:04973	Carbohydrate digestion and absorption	Pik3cd	Pik3cd	Phosphatidylinositol 4,5-bisphosphate 3-kinase catalytic subunit delta isoform	0.36738	0.733243	1.56382
PATH:04973	Carbohydrate digestion and absorption	G6pc2	G6pc2	Glucose-6-phosphatase 2	0.36738	0.733243	1.56382
PATH:00380	Tryptophan metabolism	4930438A08Rik	4930438A08Rik	Protein 4930438A08Rik	0.36738	0.733243	1.56382
PATH:00380	Tryptophan metabolism	Cat	Cat	Catalase, isoform CRA_a	0.36738	0.733243	1.56382
PATH:00600	Sphingolipid metabolism	Sgms1	Sgms1	Phosphatidylcholine:ceramide cholinephosphotransferase 1	0.36738	0.733243	1.56382
PATH:00600	Sphingolipid metabolism	Asah2	Asah2	Asah2 protein	0.36738	0.733243	1.56382
PATH:00120	Primary bile acid biosynthesis	Cyp7b1	Cyp7b1	Putative uncharacterized protein	0.369837	0.733243	2.19913
PATH:00770	Pantothenate and CoA biosynthesis	Dpyd	Dpyd	Putative uncharacterized protein	0.369837	0.733243	2.19913
PATH:04370	VEGF signaling pathway	Pla2g6	Pla2g6	85/88 kDa calcium-independent phospholipase A2	0.382874	0.752545	1.35331
PATH:04370	VEGF signaling pathway	Pik3cd	Pik3cd	Phosphatidylinositol 4,5-bisphosphate 3-kinase catalytic subunit delta isoform	0.382874	0.752545	1.35331
PATH:04370	VEGF signaling pathway	Mapk3	Mapk3	Mitogen-activated protein kinase 3	0.382874	0.752545	1.35331
PATH:04260	Cardiac muscle contraction	Cacnb4	Cacnb4	Calcium channel, voltage-dependent, beta 4 subunit	0.390623	0.761213	1.33618
PATH:04260	Cardiac muscle contraction	Cox7c	Cox7c	Cytochrome c oxidase subunit 7C, mitochondrial	0.390623	0.761213	1.33618
PATH:04260	Cardiac muscle contraction	Ryr2	Ryr2	Ryanodine receptor 2	0.390623	0.761213	1.33618
PATH:05161	Hepatitis B	Pik3cd	Pik3cd	Phosphatidylinositol 4,5-bisphosphate 3-kinase catalytic subunit delta isoform	0.395281	0.763763	1.21331
PATH:05161	Hepatitis B	Map3k1	Map3k1	Mitogen-activated protein kinase kinase kinase 1	0.395281	0.763763	1.21331
PATH:05161	Hepatitis B	Creb1	Creb1	Cyclic AMP-responsive element-binding protein 1	0.395281	0.763763	1.21331
PATH:05161	Hepatitis B	Mapk3	Mapk3	Mitogen-activated protein kinase 3	0.395281	0.763763	1.21331
PATH:05161	Hepatitis B	Ikbkb	Ikbkb	Inhibitor of nuclear factor kappa-B kinase subunit beta	0.395281	0.763763	1.21331
PATH:04070	Phosphatidylinositol signaling system	Inpp4b	Inpp4b	Type II inositol 3,4-bisphosphate 4-phosphatase	0.406046	0.771488	1.30319
PATH:04070	Phosphatidylinositol signaling system	Pik3cd	Pik3cd	Phosphatidylinositol 4,5-bisphosphate 3-kinase catalytic subunit delta isoform	0.406046	0.771488	1.30319
PATH:04070	Phosphatidylinositol signaling system	Plce1	Plce1	Phosphoinositide phospholipase C	0.406046	0.771488	1.30319
PATH:03018	RNA degradation	Cnot10	Cnot10	Putative uncharacterized protein	0.406046	0.771488	1.30319
PATH:03018	RNA degradation	Pabpc5	Pabpc5	Protein Pabpc5	0.406046	0.771488	1.30319
PATH:03018	RNA degradation	Xrn2	Xrn2	5'-3' exoribonuclease 2	0.406046	0.771488	1.30319
PATH:04080	Neuroactive ligand-receptor interaction	P2rx3	P2rx3	P2X purinoceptor 3	0.409448	0.771523	1.12296
PATH:04080	Neuroactive ligand-receptor interaction	Lep	Lep	Leptin	0.409448	0.771523	1.12296
PATH:04080	Neuroactive ligand-receptor interaction	Npffr1	Npffr1	Protein Npffr1	0.409448	0.771523	1.12296
PATH:04080	Neuroactive ligand-receptor interaction	Prlhr	Prlhr	Prolactin-releasing peptide receptor	0.409448	0.771523	1.12296
PATH:04080	Neuroactive ligand-receptor interaction	Gabrg2	Gabrg2	Gamma-aminobutyric acid receptor subunit gamma-2	0.409448	0.771523	1.12296
PATH:04080	Neuroactive ligand-receptor interaction	Gpr156	Gpr156	Probable G-protein coupled receptor 156	0.409448	0.771523	1.12296
PATH:04080	Neuroactive ligand-receptor interaction	Gabra2	Gabra2	Gamma-aminobutyric acid receptor subunit alpha-2	0.409448	0.771523	1.12296
PATH:04080	Neuroactive ligand-receptor interaction	Grm1	Grm1	Metabotropic glutamate receptor 1	0.409448	0.771523	1.12296
PATH:04080	Neuroactive ligand-receptor interaction	Mchr1	Mchr1	Melanin-concentrating hormone receptor 1 alternate form	0.409448	0.771523	1.12296
PATH:01212	Fatty acid metabolism	Acsl1	Acsl1	Long-chain-fatty-acid--CoA ligase 1	0.417933	0.774122	1.40744
PATH:01212	Fatty acid metabolism	Elovl2	Elovl2	Elongation of very long chain fatty acids protein 2	0.417933	0.774122	1.40744
PATH:00510	N-Glycan biosynthesis	Rft1	Rft1	Rft1 protein	0.417933	0.774122	1.40744
PATH:00510	N-Glycan biosynthesis	Alg12	Alg12	Dol-P-Man:Man(7)GlcNAc(2)-PP-Dol alpha-1,6-mannosyltransferase	0.417933	0.774122	1.40744
PATH:00561	Glycerolipid metabolism	Agpat4	Agpat4	1-acyl-sn-glycerol-3-phosphate acyltransferase delta	0.427804	0.774122	1.37984
PATH:00561	Glycerolipid metabolism	Agk	Agk	Acylglycerol kinase, mitochondrial	0.427804	0.774122	1.37984
PATH:00280	Valine, leucine and isoleucine degradation	4930438A08Rik	4930438A08Rik	Protein 4930438A08Rik	0.427804	0.774122	1.37984
PATH:00280	Valine, leucine and isoleucine degradation	Aldh6a1	Aldh6a1	Aldh6a1 protein	0.427804	0.774122	1.37984
PATH:03460	Fanconi anemia pathway	Brca2	Brca2	Breast cancer type 2 susceptibility protein homolog	0.427804	0.774122	1.37984
PATH:03460	Fanconi anemia pathway	Pms2	Pms2	Pms2 protein	0.427804	0.774122	1.37984
PATH:04810	Regulation of actin cytoskeleton	Fgf20	Fgf20	Fibroblast growth factor 20	0.435285	0.781457	1.11956
PATH:04810	Regulation of actin cytoskeleton	Iqgap2	Iqgap2	IQ motif containing GTPase activating protein 2	0.435285	0.781457	1.11956
PATH:04810	Regulation of actin cytoskeleton	Cfl2	Cfl2	Cofilin-2	0.435285	0.781457	1.11956
PATH:04810	Regulation of actin cytoskeleton	Pik3cd	Pik3cd	Phosphatidylinositol 4,5-bisphosphate 3-kinase catalytic subunit delta isoform	0.435285	0.781457	1.11956
PATH:04810	Regulation of actin cytoskeleton	Itga8	Itga8	Integrin alpha-8	0.435285	0.781457	1.11956
PATH:04810	Regulation of actin cytoskeleton	Mapk3	Mapk3	Mitogen-activated protein kinase 3	0.435285	0.781457	1.11956
PATH:04810	Regulation of actin cytoskeleton	Egfr	Egfr	Truncated epidermal growth factor receptor	0.435285	0.781457	1.11956
PATH:04144	Endocytosis	Arap2	Arap2	Arf-GAP with Rho-GAP domain, ANK repeat and PH domain-containing protein 2	0.43996	0.783679	1.11449
PATH:04144	Endocytosis	Met	Met	Met protein	0.43996	0.783679	1.11449
PATH:04144	Endocytosis	Kit	Kit	KIT oncogene	0.43996	0.783679	1.11449
PATH:04144	Endocytosis	Vps4b	Vps4b	Vacuolar protein sorting-associated protein 4B	0.43996	0.783679	1.11449
PATH:04144	Endocytosis	Smap1	Smap1	Stromal membrane-associated protein 1, isoform CRA_b	0.43996	0.783679	1.11449
PATH:04144	Endocytosis	Cxcr4	Cxcr4	Chemokine receptor 4	0.43996	0.783679	1.11449
PATH:04144	Endocytosis	Egfr	Egfr	Truncated epidermal growth factor receptor	0.43996	0.783679	1.11449
PATH:04670	Leukocyte transendothelial migration	Pik3cd	Pik3cd	Phosphatidylinositol 4,5-bisphosphate 3-kinase catalytic subunit delta isoform	0.445887	0.78808	1.17287
PATH:04670	Leukocyte transendothelial migration	Ctnna3	Ctnna3	Alpha-T-catenin isoform X	0.445887	0.78808	1.17287
PATH:04670	Leukocyte transendothelial migration	Cxcr4	Cxcr4	Chemokine receptor 4	0.445887	0.78808	1.17287
PATH:04670	Leukocyte transendothelial migration	Rapgef4	Rapgef4	Rapgef4 protein	0.445887	0.78808	1.17287
PATH:00360	Phenylalanine metabolism	4930438A08Rik	4930438A08Rik	Protein 4930438A08Rik	0.454627	0.797347	1.67553
PATH:04961	Endocrine and other factor-regulated calcium reabsorption	Atp2b1	Atp2b1	Plasma membrane calcium-transporting ATPase 1	0.46638	0.806006	1.27949
PATH:04961	Endocrine and other factor-regulated calcium reabsorption	Adcy9	Adcy9	Adenylate cyclase type 9	0.46638	0.806006	1.27949
PATH:00900	Terpenoid backbone biosynthesis	Pdss1	Pdss1	Decaprenyl-diphosphate synthase subunit 1	0.47017	0.806006	1.59937
PATH:03430	Mismatch repair	Pms2	Pms2	Pms2 protein	0.47017	0.806006	1.59937
PATH:05014	Amyotrophic lateral sclerosis (ALS)	Nefm	Nefm	Neurofilament medium polypeptide	0.475784	0.807469	1.25664
PATH:05014	Amyotrophic lateral sclerosis (ALS)	Cat	Cat	Catalase, isoform CRA_a	0.475784	0.807469	1.25664
PATH:04060	Cytokine-cytokine receptor interaction	Lep	Lep	Leptin	0.478107	0.807469	1.06624
PATH:04060	Cytokine-cytokine receptor interaction	Met	Met	Met protein	0.478107	0.807469	1.06624
PATH:04060	Cytokine-cytokine receptor interaction	Kit	Kit	KIT oncogene	0.478107	0.807469	1.06624
PATH:04060	Cytokine-cytokine receptor interaction	Tnfrsf21	Tnfrsf21	Putative uncharacterized protein	0.478107	0.807469	1.06624
PATH:04060	Cytokine-cytokine receptor interaction	Tnfsf8	Tnfsf8	Tumor necrosis factor ligand superfamily member 8	0.478107	0.807469	1.06624
PATH:04060	Cytokine-cytokine receptor interaction	Bmp2	Bmp2	Bone morphogenetic protein 2	0.478107	0.807469	1.06624
PATH:04060	Cytokine-cytokine receptor interaction	Cxcr4	Cxcr4	Chemokine receptor 4	0.478107	0.807469	1.06624
PATH:04060	Cytokine-cytokine receptor interaction	Egfr	Egfr	Truncated epidermal growth factor receptor	0.478107	0.807469	1.06624
PATH:04750	Inflammatory mediator regulation of TRP channels	Pla2g6	Pla2g6	85/88 kDa calcium-independent phospholipase A2	0.483521	0.810608	1.11702
PATH:04750	Inflammatory mediator regulation of TRP channels	Pik3cd	Pik3cd	Phosphatidylinositol 4,5-bisphosphate 3-kinase catalytic subunit delta isoform	0.483521	0.810608	1.11702
PATH:04750	Inflammatory mediator regulation of TRP channels	Ngf	Ngf	Beta-nerve growth factor	0.483521	0.810608	1.11702
PATH:04750	Inflammatory mediator regulation of TRP channels	Adcy9	Adcy9	Adenylate cyclase type 9	0.483521	0.810608	1.11702
PATH:00062	Fatty acid elongation	Elovl2	Elovl2	Elongation of very long chain fatty acids protein 2	0.499946	0.825943	1.46609
PATH:00592	alpha-Linolenic acid metabolism	Pla2g6	Pla2g6	85/88 kDa calcium-independent phospholipase A2	0.514203	0.825943	1.40744
PATH:01040	Biosynthesis of unsaturated fatty acids	Elovl2	Elovl2	Elongation of very long chain fatty acids protein 2	0.514203	0.825943	1.40744
PATH:04728	Dopaminergic synapse	Gng8	Gng8	Guanine nucleotide-binding protein G(I)/G(S)/G(O) subunit gamma-8	0.526098	0.825943	1.05823
PATH:04728	Dopaminergic synapse	Gnb4	Gnb4	Guanine nucleotide-binding protein subunit beta-4	0.526098	0.825943	1.05823
PATH:04728	Dopaminergic synapse	Ppp2r1b	Ppp2r1b	Serine/threonine-protein phosphatase 2A 65 kDa regulatory subunit A beta isoform	0.526098	0.825943	1.05823
PATH:04728	Dopaminergic synapse	Creb1	Creb1	Cyclic AMP-responsive element-binding protein 1	0.526098	0.825943	1.05823
PATH:04950	Maturity onset diabetes of the young	Hnf4g	Hnf4g	Hepatocyte nuclear factor 4-gamma	0.528055	0.825943	1.35331
PATH:00534	Glycosaminoglycan biosynthesis - heparan sulfate / heparin	Ext2	Ext2	Exostosin-2	0.528055	0.825943	1.35331
PATH:03013	RNA transport	Nup107	Nup107	Nuclear pore complex protein Nup107	0.533304	0.825943	1.03488
PATH:03013	RNA transport	Thoc1	Thoc1	Putative uncharacterized protein	0.533304	0.825943	1.03488
PATH:03013	RNA transport	Pop7	Pop7	Ribonuclease P protein subunit p20	0.533304	0.825943	1.03488
PATH:03013	RNA transport	Nop10	Nop10	H/ACA ribonucleoprotein complex subunit 3	0.533304	0.825943	1.03488
PATH:03013	RNA transport	Pabpc5	Pabpc5	Protein Pabpc5	0.533304	0.825943	1.03488
PATH:00010	Glycolysis / Gluconeogenesis	G6pc2	G6pc2	Glucose-6-phosphatase 2	0.538698	0.825943	1.11702
PATH:00010	Glycolysis / Gluconeogenesis	Pgm1	Pgm1	Phosphoglucomutase-2	0.538698	0.825943	1.11702
PATH:04721	Synaptic vesicle cycle	Atp6v1c2	Atp6v1c2	V-type proton ATPase subunit C 2	0.538698	0.825943	1.11702
PATH:04721	Synaptic vesicle cycle	Unc13c	Unc13c	Putative uncharacterized protein	0.538698	0.825943	1.11702
PATH:04742	Taste transduction	Tas2r114	Tas2r114	Taste receptor type 2 member 114	0.538698	0.825943	1.11702
PATH:04742	Taste transduction	Scnn1a	Scnn1a	Amiloride-sensitive sodium channel subunit alpha	0.538698	0.825943	1.11702
PATH:04966	Collecting duct acid secretion	Atp6v1c2	Atp6v1c2	V-type proton ATPase subunit C 2	0.541514	0.825943	1.30319
PATH:03440	Homologous recombination	Brca2	Brca2	Breast cancer type 2 susceptibility protein homolog	0.541514	0.825943	1.30319
PATH:04744	Phototransduction	Gucy2f	Gucy2f	Retinal guanylyl cyclase 2	0.554591	0.825943	1.25664
PATH:00340	Histidine metabolism	Mettl2	Mettl2	Methyltransferase-like protein 2	0.554591	0.825943	1.25664
PATH:00512	Mucin type O-Glycan biosynthesis	C1galt1	C1galt1	Glycoprotein-N-acetylgalactosamine 3-beta-galactosyltransferase 1	0.554591	0.825943	1.25664
PATH:03040	Spliceosome	Thoc1	Thoc1	Putative uncharacterized protein	0.555459	0.825943	1.01989
PATH:03040	Spliceosome	Prpf3	Prpf3	U4/U6 small nuclear ribonucleoprotein Prp3	0.555459	0.825943	1.01989
PATH:03040	Spliceosome	Prpf31	Prpf31	U4/U6 small nuclear ribonucleoprotein Prp31	0.555459	0.825943	1.01989
PATH:03040	Spliceosome	Sf3b4	Sf3b4	Splicing factor 3B subunit 4	0.555459	0.825943	1.01989
PATH:00983	Drug metabolism - other enzymes	Dpyd	Dpyd	Putative uncharacterized protein	0.555699	0.825943	1.08265
PATH:00983	Drug metabolism - other enzymes	Ces5a	Ces5a	Carboxylesterase 5A	0.555699	0.825943	1.08265
PATH:05169	Epstein-Barr virus infection	Traf3	Traf3	TNF receptor-associated factor 3	0.558339	0.825943	1.00055
PATH:05169	Epstein-Barr virus infection	Pik3cd	Pik3cd	Phosphatidylinositol 4,5-bisphosphate 3-kinase catalytic subunit delta isoform	0.558339	0.825943	1.00055
PATH:05169	Epstein-Barr virus infection	Cd38	Cd38	ADP-ribosyl cyclase/cyclic ADP-ribose hydrolase 1	0.558339	0.825943	1.00055
PATH:05169	Epstein-Barr virus infection	Hdac4	Hdac4	Histone deacetylase 4	0.558339	0.825943	1.00055
PATH:05169	Epstein-Barr virus infection	Syk	Syk	Tyrosine-protein kinase SYK	0.558339	0.825943	1.00055
PATH:05169	Epstein-Barr virus infection	Ikbkb	Ikbkb	Inhibitor of nuclear factor kappa-B kinase subunit beta	0.558339	0.825943	1.00055
PATH:05210	Colorectal cancer	Pik3cd	Pik3cd	Phosphatidylinositol 4,5-bisphosphate 3-kinase catalytic subunit delta isoform	0.564031	0.825943	1.06624
PATH:05210	Colorectal cancer	Mapk3	Mapk3	Mitogen-activated protein kinase 3	0.564031	0.825943	1.06624
PATH:01100	Metabolic pathways	Atp6v1c2	Atp6v1c2	V-type proton ATPase subunit C 2	0.565119	0.825943	0.986254
PATH:01100	Metabolic pathways	Acsl1	Acsl1	Long-chain-fatty-acid--CoA ligase 1	0.565119	0.825943	0.986254
PATH:01100	Metabolic pathways	Cox7c	Cox7c	Cytochrome c oxidase subunit 7C, mitochondrial	0.565119	0.825943	0.986254
PATH:01100	Metabolic pathways	Agpat4	Agpat4	1-acyl-sn-glycerol-3-phosphate acyltransferase delta	0.565119	0.825943	0.986254
PATH:01100	Metabolic pathways	Atp5e	Atp5e	ATP synthase subunit epsilon, mitochondrial	0.565119	0.825943	0.986254
PATH:01100	Metabolic pathways	B3galt1	B3galt1	Beta-1,3-galactosyltransferase 1	0.565119	0.825943	0.986254
PATH:01100	Metabolic pathways	Sgms1	Sgms1	Phosphatidylcholine:ceramide cholinephosphotransferase 1	0.565119	0.825943	0.986254
PATH:01100	Metabolic pathways	Fpgt	Fpgt	Protein Fpgt	0.565119	0.825943	0.986254
PATH:01100	Metabolic pathways	Sat2	Sat2	Putative uncharacterized protein	0.565119	0.825943	0.986254
PATH:01100	Metabolic pathways	Agk	Agk	Acylglycerol kinase, mitochondrial	0.565119	0.825943	0.986254
PATH:01100	Metabolic pathways	Pla2g6	Pla2g6	85/88 kDa calcium-independent phospholipase A2	0.565119	0.825943	0.986254
PATH:01100	Metabolic pathways	Gldc	Gldc	Putative uncharacterized protein	0.565119	0.825943	0.986254
PATH:01100	Metabolic pathways	Inpp4b	Inpp4b	Type II inositol 3,4-bisphosphate 4-phosphatase	0.565119	0.825943	0.986254
PATH:01100	Metabolic pathways	Dct	Dct	L-dopachrome tautomerase	0.565119	0.825943	0.986254
PATH:01100	Metabolic pathways	Pigm	Pigm	GPI mannosyltransferase 1	0.565119	0.825943	0.986254
PATH:01100	Metabolic pathways	Pgap1	Pgap1	Putative uncharacterized protein	0.565119	0.825943	0.986254
PATH:01100	Metabolic pathways	Tkt	Tkt	Transketolase	0.565119	0.825943	0.986254
PATH:01100	Metabolic pathways	C1galt1	C1galt1	Glycoprotein-N-acetylgalactosamine 3-beta-galactosyltransferase 1	0.565119	0.825943	0.986254
PATH:01100	Metabolic pathways	Ext2	Ext2	Exostosin-2	0.565119	0.825943	0.986254
PATH:01100	Metabolic pathways	Cd38	Cd38	ADP-ribosyl cyclase/cyclic ADP-ribose hydrolase 1	0.565119	0.825943	0.986254
PATH:01100	Metabolic pathways	Coq3	Coq3	Putative uncharacterized protein	0.565119	0.825943	0.986254
PATH:01100	Metabolic pathways	Dpyd	Dpyd	Putative uncharacterized protein	0.565119	0.825943	0.986254
PATH:01100	Metabolic pathways	Lap3	Lap3	Cytosol aminopeptidase	0.565119	0.825943	0.986254
PATH:01100	Metabolic pathways	St8sia5	St8sia5	Alpha-2,8-sialyltransferase 8E	0.565119	0.825943	0.986254
PATH:01100	Metabolic pathways	Cat	Cat	Catalase, isoform CRA_a	0.565119	0.825943	0.986254
PATH:01100	Metabolic pathways	Ces5a	Ces5a	Carboxylesterase 5A	0.565119	0.825943	0.986254
PATH:01100	Metabolic pathways	Aldh6a1	Aldh6a1	Aldh6a1 protein	0.565119	0.825943	0.986254
PATH:01100	Metabolic pathways	Plce1	Plce1	Phosphoinositide phospholipase C	0.565119	0.825943	0.986254
PATH:01100	Metabolic pathways	Asah2	Asah2	Asah2 protein	0.565119	0.825943	0.986254
PATH:01100	Metabolic pathways	G6pc2	G6pc2	Glucose-6-phosphatase 2	0.565119	0.825943	0.986254
PATH:01100	Metabolic pathways	Srm	Srm	Putative uncharacterized protein	0.565119	0.825943	0.986254
PATH:01100	Metabolic pathways	Alg12	Alg12	Dol-P-Man:Man(7)GlcNAc(2)-PP-Dol alpha-1,6-mannosyltransferase	0.565119	0.825943	0.986254
PATH:01100	Metabolic pathways	Fut9	Fut9	Alpha-(1,3)-fucosyltransferase 9	0.565119	0.825943	0.986254
PATH:01100	Metabolic pathways	Pgm1	Pgm1	Phosphoglucomutase-2	0.565119	0.825943	0.986254
PATH:00230	Purine metabolism	Pde7b	Pde7b	cAMP-specific 3',5'-cyclic phosphodiesterase 7B	0.569521	0.825989	0.993956
PATH:00230	Purine metabolism	Adcy9	Adcy9	Adenylate cyclase type 9	0.569521	0.825989	0.993956
PATH:00230	Purine metabolism	Gucy2f	Gucy2f	Retinal guanylyl cyclase 2	0.569521	0.825989	0.993956
PATH:00230	Purine metabolism	Pde3b	Pde3b	cGMP-inhibited 3',5'-cyclic phosphodiesterase B	0.569521	0.825989	0.993956
PATH:00230	Purine metabolism	Pgm1	Pgm1	Phosphoglucomutase-2	0.569521	0.825989	0.993956
PATH:05202	Transcriptional misregulation in cancer	Bcl6	Bcl6	B-cell lymphoma 6 protein homolog	0.579603	0.825989	0.98285
PATH:05202	Transcriptional misregulation in cancer	H3f3b	H3f3b	H3 histone, family 3B	0.579603	0.825989	0.98285
PATH:05202	Transcriptional misregulation in cancer	Met	Met	Met protein	0.579603	0.825989	0.98285
PATH:05202	Transcriptional misregulation in cancer	Etv5	Etv5	ETS translocation variant 5	0.579603	0.825989	0.98285
PATH:05202	Transcriptional misregulation in cancer	Bmp2k	Bmp2k	Putative uncharacterized protein	0.579603	0.825989	0.98285
PATH:00450	Selenocompound metabolism	Mettl2	Mettl2	Methyltransferase-like protein 2	0.579642	0.825989	1.17287
PATH:00630	Glyoxylate and dicarboxylate metabolism	Cat	Cat	Catalase, isoform CRA_a	0.579642	0.825989	1.17287
PATH:04710	Circadian rhythm	Creb1	Creb1	Cyclic AMP-responsive element-binding protein 1	0.591636	0.829602	1.13503
PATH:04726	Serotonergic synapse	Gng8	Gng8	Guanine nucleotide-binding protein G(I)/G(S)/G(O) subunit gamma-8	0.59489	0.829602	0.97065
PATH:04726	Serotonergic synapse	Pla2g6	Pla2g6	85/88 kDa calcium-independent phospholipase A2	0.59489	0.829602	0.97065
PATH:04726	Serotonergic synapse	Gnb4	Gnb4	Guanine nucleotide-binding protein subunit beta-4	0.59489	0.829602	0.97065
PATH:04726	Serotonergic synapse	Mapk3	Mapk3	Mitogen-activated protein kinase 3	0.59489	0.829602	0.97065
PATH:00640	Propanoate metabolism	Aldh6a1	Aldh6a1	Aldh6a1 protein	0.603289	0.829602	1.09956
PATH:00760	Nicotinate and nicotinamide metabolism	Cd38	Cd38	ADP-ribosyl cyclase/cyclic ADP-ribose hydrolase 1	0.603289	0.829602	1.09956
PATH:01200	Carbon metabolism	Gldc	Gldc	Putative uncharacterized protein	0.603501	0.829602	0.968423
PATH:01200	Carbon metabolism	Tkt	Tkt	Transketolase	0.603501	0.829602	0.968423
PATH:01200	Carbon metabolism	Aldh6a1	Aldh6a1	Aldh6a1 protein	0.603501	0.829602	0.968423
PATH:04918	Thyroid hormone synthesis	Adcy9	Adcy9	Adenylate cyclase type 9	0.604008	0.829602	0.991156
PATH:04918	Thyroid hormone synthesis	Creb1	Creb1	Cyclic AMP-responsive element-binding protein 1	0.604008	0.829602	0.991156
PATH:04971	Gastric acid secretion	Kcnj16	Kcnj16	Inward rectifier potassium channel 16	0.626639	0.850439	0.950974
PATH:04971	Gastric acid secretion	Adcy9	Adcy9	Adenylate cyclase type 9	0.626639	0.850439	0.950974
PATH:04917	Prolactin signaling pathway	Pik3cd	Pik3cd	Phosphatidylinositol 4,5-bisphosphate 3-kinase catalytic subunit delta isoform	0.626639	0.850439	0.950974
PATH:04917	Prolactin signaling pathway	Mapk3	Mapk3	Mitogen-activated protein kinase 3	0.626639	0.850439	0.950974
PATH:05020	Prion diseases	Mapk3	Mapk3	Mitogen-activated protein kinase 3	0.636301	0.856584	1.00532
PATH:04932	Non-alcoholic fatty liver disease (NAFLD)	Cox7c	Cox7c	Cytochrome c oxidase subunit 7C, mitochondrial	0.642438	0.856584	0.913923
PATH:04932	Non-alcoholic fatty liver disease (NAFLD)	Lep	Lep	Leptin	0.642438	0.856584	0.913923
PATH:04932	Non-alcoholic fatty liver disease (NAFLD)	Pik3cd	Pik3cd	Phosphatidylinositol 4,5-bisphosphate 3-kinase catalytic subunit delta isoform	0.642438	0.856584	0.913923
PATH:04932	Non-alcoholic fatty liver disease (NAFLD)	Ikbkb	Ikbkb	Inhibitor of nuclear factor kappa-B kinase subunit beta	0.642438	0.856584	0.913923
PATH:03010	Ribosome	Mrps14	Mrps14	28S ribosomal protein S14, mitochondrial	0.642438	0.856584	0.913923
PATH:03010	Ribosome	Rpl13	Rpl13	60S ribosomal protein L13	0.642438	0.856584	0.913923
PATH:03010	Ribosome	Rpl34	Rpl34	60S ribosomal protein L34	0.642438	0.856584	0.913923
PATH:03010	Ribosome	Mrps9	Mrps9	Putative uncharacterized protein	0.642438	0.856584	0.913923
PATH:05206	MicroRNAs in cancer	Tnr	Tnr	Tenascin-R	0.652332	0.858576	0.912231
PATH:05206	MicroRNAs in cancer	Mmp16	Mmp16	Matrix metalloproteinase-16	0.652332	0.858576	0.912231
PATH:05206	MicroRNAs in cancer	Wnt3	Wnt3	Protein Wnt	0.652332	0.858576	0.912231
PATH:05206	MicroRNAs in cancer	Met	Met	Met protein	0.652332	0.858576	0.912231
PATH:05206	MicroRNAs in cancer	Rptor	Rptor	Regulatory-associated protein of mTOR	0.652332	0.858576	0.912231
PATH:05206	MicroRNAs in cancer	Egfr	Egfr	Truncated epidermal growth factor receptor	0.652332	0.858576	0.912231
PATH:05206	MicroRNAs in cancer	Ikbkb	Ikbkb	Inhibitor of nuclear factor kappa-B kinase subunit beta	0.652332	0.858576	0.912231
PATH:04630	Jak-STAT signaling pathway	Lep	Lep	Leptin	0.652497	0.858576	0.902206
PATH:04630	Jak-STAT signaling pathway	Ifnl3	Ifnl3	Interferon lambda-3	0.652497	0.858576	0.902206
PATH:04630	Jak-STAT signaling pathway	Pik3cd	Pik3cd	Phosphatidylinositol 4,5-bisphosphate 3-kinase catalytic subunit delta isoform	0.652497	0.858576	0.902206
PATH:04630	Jak-STAT signaling pathway	Spry1	Spry1	Sprouty1	0.652497	0.858576	0.902206
PATH:00250	Alanine, aspartate and glutamate metabolism	4930438A08Rik	4930438A08Rik	Protein 4930438A08Rik	0.656775	0.858576	0.950974
PATH:05132	Salmonella infection	Flnc	Flnc	Filamin-C	0.662117	0.858576	0.890786
PATH:05132	Salmonella infection	Mapk3	Mapk3	Mitogen-activated protein kinase 3	0.662117	0.858576	0.890786
PATH:05146	Amoebiasis	Col3a1	Col3a1	Collagen alpha-1(III) chain	0.662762	0.858576	0.887043
PATH:05146	Amoebiasis	Pik3cd	Pik3cd	Phosphatidylinositol 4,5-bisphosphate 3-kinase catalytic subunit delta isoform	0.662762	0.858576	0.887043
PATH:05146	Amoebiasis	Serpinb9e	Serpinb9e	Serine (Or cysteine) peptidase inhibitor, clade B, member 9e	0.662762	0.858576	0.887043
PATH:00565	Ether lipid metabolism	Pla2g6	Pla2g6	85/88 kDa calcium-independent phospholipase A2	0.666577	0.858576	0.925949
PATH:04650	Natural killer cell mediated cytotoxicity	Pik3cd	Pik3cd	Phosphatidylinositol 4,5-bisphosphate 3-kinase catalytic subunit delta isoform	0.673817	0.858576	0.872381
PATH:04650	Natural killer cell mediated cytotoxicity	Syk	Syk	Tyrosine-protein kinase SYK	0.673817	0.858576	0.872381
PATH:04650	Natural killer cell mediated cytotoxicity	Mapk3	Mapk3	Mitogen-activated protein kinase 3	0.673817	0.858576	0.872381
PATH:03320	PPAR signaling pathway	Acsl1	Acsl1	Long-chain-fatty-acid--CoA ligase 1	0.675534	0.858576	0.868791
PATH:03320	PPAR signaling pathway	Aqp7	Aqp7	Aquaporin-7	0.675534	0.858576	0.868791
PATH:04146	Peroxisome	Acsl1	Acsl1	Long-chain-fatty-acid--CoA ligase 1	0.682079	0.858576	0.858196
PATH:04146	Peroxisome	Cat	Cat	Catalase, isoform CRA_a	0.682079	0.858576	0.858196
PATH:00260	Glycine, serine and threonine metabolism	Gldc	Gldc	Putative uncharacterized protein	0.685354	0.858576	0.879651
PATH:00051	Fructose and mannose metabolism	Fpgt	Fpgt	Protein Fpgt	0.685354	0.858576	0.879651
PATH:00140	Steroid hormone biosynthesis	Cyp7b1	Cyp7b1	Putative uncharacterized protein	0.701072	0.871206	0.827907
PATH:00140	Steroid hormone biosynthesis	Srd5a2	Srd5a2	3-oxo-5-alpha-steroid 4-dehydrogenase 2	0.701072	0.871206	0.827907
PATH:04975	Fat digestion and absorption	Pla2g6	Pla2g6	85/88 kDa calcium-independent phospholipase A2	0.703078	0.871206	0.837763
PATH:04640	Hematopoietic cell lineage	Kit	Kit	KIT oncogene	0.707191	0.871566	0.81828
PATH:04640	Hematopoietic cell lineage	Cd38	Cd38	ADP-ribosyl cyclase/cyclic ADP-ribose hydrolase 1	0.707191	0.871566	0.81828
PATH:04270	Vascular smooth muscle contraction	Pla2g6	Pla2g6	85/88 kDa calcium-independent phospholipase A2	0.715375	0.872122	0.81828
PATH:04270	Vascular smooth muscle contraction	Adcy9	Adcy9	Adenylate cyclase type 9	0.715375	0.872122	0.81828
PATH:04270	Vascular smooth muscle contraction	Mapk3	Mapk3	Mitogen-activated protein kinase 3	0.715375	0.872122	0.81828
PATH:05164	Influenza A	Oas1a	Oas1a	2'-5'-oligoadenylate synthase 1A	0.717572	0.872122	0.827907
PATH:05164	Influenza A	Pik3cd	Pik3cd	Phosphatidylinositol 4,5-bisphosphate 3-kinase catalytic subunit delta isoform	0.717572	0.872122	0.827907
PATH:05164	Influenza A	Mapk3	Mapk3	Mitogen-activated protein kinase 3	0.717572	0.872122	0.827907
PATH:05164	Influenza A	Ikbkb	Ikbkb	Inhibitor of nuclear factor kappa-B kinase subunit beta	0.717572	0.872122	0.827907
PATH:00564	Glycerophospholipid metabolism	Agpat4	Agpat4	1-acyl-sn-glycerol-3-phosphate acyltransferase delta	0.719118	0.872122	0.799683
PATH:00564	Glycerophospholipid metabolism	Pla2g6	Pla2g6	85/88 kDa calcium-independent phospholipase A2	0.719118	0.872122	0.799683
PATH:05416	Viral myocarditis	Abl2	Abl2	Abelson tyrosine-protein kinase 2	0.724927	0.873525	0.790698
PATH:05416	Viral myocarditis	Myh13	Myh13	Protein Myh13	0.724927	0.873525	0.790698
PATH:03050	Proteasome	Pomp	Pomp	Proteasome maturation protein	0.7356	0.873525	0.764914
PATH:02010	ABC transporters	Abcb10	Abcb10	ATP-binding cassette sub-family B member 10, mitochondrial	0.7356	0.873525	0.764914
PATH:04672	Intestinal immune network for IgA production	Cxcr4	Cxcr4	Chemokine receptor 4	0.7356	0.873525	0.764914
PATH:04978	Mineral absorption	Atp2b1	Atp2b1	Plasma membrane calcium-transporting ATPase 1	0.74316	0.876921	0.748639
PATH:00071	Fatty acid degradation	Acsl1	Acsl1	Long-chain-fatty-acid--CoA ligase 1	0.750505	0.876921	0.733043
PATH:05030	Cocaine addiction	Creb1	Creb1	Cyclic AMP-responsive element-binding protein 1	0.757641	0.876921	0.718083
PATH:00514	Other types of O-glycan biosynthesis	Fut9	Fut9	Alpha-(1,3)-fucosyltransferase 9	0.757641	0.876921	0.718083
PATH:03015	mRNA surveillance pathway	Ppp2r1b	Ppp2r1b	Serine/threonine-protein phosphatase 2A 65 kDa regulatory subunit A beta isoform	0.75769	0.876921	0.740759
PATH:03015	mRNA surveillance pathway	Pabpc5	Pabpc5	Protein Pabpc5	0.75769	0.876921	0.740759
PATH:05144	Malaria	Met	Met	Met protein	0.764574	0.880419	0.703721
PATH:00190	Oxidative phosphorylation	Atp6v1c2	Atp6v1c2	V-type proton ATPase subunit C 2	0.769907	0.882104	0.748639
PATH:00190	Oxidative phosphorylation	Cox7c	Cox7c	Cytochrome c oxidase subunit 7C, mitochondrial	0.769907	0.882104	0.748639
PATH:00190	Oxidative phosphorylation	Atp5e	Atp5e	ATP synthase subunit epsilon, mitochondrial	0.769907	0.882104	0.748639
PATH:00591	Linoleic acid metabolism	Pla2g6	Pla2g6	85/88 kDa calcium-independent phospholipase A2	0.777853	0.886753	0.676655
PATH:04913	Ovarian steroidogenesis	Adcy9	Adcy9	Adenylate cyclase type 9	0.81338	0.919553	0.606656
PATH:04514	Cell adhesion molecules (CAMs)	Pdcd1	Pdcd1	Programmed cell death protein 1	0.815647	0.919553	0.689922
PATH:04514	Cell adhesion molecules (CAMs)	Mpzl1	Mpzl1	Myelin protein zero-like protein 1	0.815647	0.919553	0.689922
PATH:04514	Cell adhesion molecules (CAMs)	Itga8	Itga8	Integrin alpha-8	0.815647	0.919553	0.689922
PATH:04940	Type I diabetes mellitus	Cpe	Cpe	Carboxypeptidase E	0.818725	0.919553	0.596374
PATH:04623	Cytosolic DNA-sensing pathway	Ikbkb	Ikbkb	Inhibitor of nuclear factor kappa-B kinase subunit beta	0.838623	0.937285	0.558509
PATH:00970	Aminoacyl-tRNA biosynthesis	Lars	Lars	MKIAA1352 protein	0.843248	0.937856	0.549782
PATH:05140	Leishmaniasis	Mapk3	Mapk3	Mitogen-activated protein kinase 3	0.847741	0.938276	0.541324
PATH:04115	p53 signaling pathway	Pmaip1	Pmaip1	Phorbol-12-myristate-13-acetate-induced protein 1	0.860465	0.947588	0.517442
PATH:05031	Amphetamine addiction	Creb1	Creb1	Cyclic AMP-responsive element-binding protein 1	0.864467	0.947588	0.509943
PATH:04142	Lysosome	Ap3s1	Ap3s1	MCG3457, isoform CRA_b	0.869573	0.948625	0.572131
PATH:04142	Lysosome	Ap3m2	Ap3m2	Putative uncharacterized protein	0.869573	0.948625	0.572131
PATH:04976	Bile secretion	Adcy9	Adcy9	Adenylate cyclase type 9	0.875799	0.950867	0.488695
PATH:05152	Tuberculosis	Creb1	Creb1	Cyclic AMP-responsive element-binding protein 1	0.886673	0.951025	0.593023
PATH:05152	Tuberculosis	Syk	Syk	Tyrosine-protein kinase SYK	0.886673	0.951025	0.593023
PATH:05152	Tuberculosis	Mapk3	Mapk3	Mitogen-activated protein kinase 3	0.886673	0.951025	0.593023
PATH:05010	Alzheimer's disease	Cox7c	Cox7c	Cytochrome c oxidase subunit 7C, mitochondrial	0.888927	0.951025	0.58971
PATH:05010	Alzheimer's disease	Atp5e	Atp5e	ATP synthase subunit epsilon, mitochondrial	0.888927	0.951025	0.58971
PATH:05010	Alzheimer's disease	Mapk3	Mapk3	Mitogen-activated protein kinase 3	0.888927	0.951025	0.58971
PATH:04610	Complement and coagulation cascades	Vwf	Vwf	Vwf protein	0.889455	0.951025	0.462974
PATH:01230	Biosynthesis of amino acids	Tkt	Tkt	Transketolase	0.892628	0.951025	0.456962
PATH:04612	Antigen processing and presentation	Creb1	Creb1	Cyclic AMP-responsive element-binding protein 1	0.898706	0.953046	0.445393
PATH:05162	Measles	Oas1a	Oas1a	2'-5'-oligoadenylate synthase 1A	0.905632	0.955944	0.513665
PATH:05162	Measles	Pik3cd	Pik3cd	Phosphatidylinositol 4,5-bisphosphate 3-kinase catalytic subunit delta isoform	0.905632	0.955944	0.513665
PATH:05323	Rheumatoid arthritis	Atp6v1c2	Atp6v1c2	V-type proton ATPase subunit C 2	0.912444	0.958696	0.418882
PATH:05168	Herpes simplex infection	Traf3	Traf3	TNF receptor-associated factor 3	0.927868	0.962929	0.527791
PATH:05168	Herpes simplex infection	Oas1a	Oas1a	2'-5'-oligoadenylate synthase 1A	0.927868	0.962929	0.527791
PATH:05168	Herpes simplex infection	Ikbkb	Ikbkb	Inhibitor of nuclear factor kappa-B kinase subunit beta	0.927868	0.962929	0.527791
PATH:05204	Chemical carcinogenesis	Gsta3	Gsta3	Glutathione S-transferase A3	0.930669	0.962929	0.382457
PATH:05012	Parkinson's disease	Cox7c	Cox7c	Cytochrome c oxidase subunit 7C, mitochondrial	0.935397	0.962929	0.459948
PATH:05012	Parkinson's disease	Atp5e	Atp5e	ATP synthase subunit epsilon, mitochondrial	0.935397	0.962929	0.459948
PATH:00980	Metabolism of xenobiotics by cytochrome P450	Gsta3	Gsta3	Glutathione S-transferase A3	0.938312	0.962929	0.366521
PATH:00590	Arachidonic acid metabolism	Pla2g6	Pla2g6	85/88 kDa calcium-independent phospholipase A2	0.941812	0.962929	0.359041
PATH:00982	Drug metabolism - cytochrome P450	Gsta3	Gsta3	Glutathione S-transferase A3	0.941812	0.962929	0.359041
PATH:00240	Pyrimidine metabolism	Dpyd	Dpyd	Putative uncharacterized protein	0.953945	0.97098	0.331944
PATH:05322	Systemic lupus erythematosus	H3f3b	H3f3b	H3 histone, family 3B	0.986563	0.997944	0.237744
PATH:04141	Protein processing in endoplasmic reticulum	Ero1l	Ero1l	Putative uncharacterized protein	0.992762	0.997944	0.208201
PATH:04145	Phagosome	Atp6v1c2	Atp6v1c2	V-type proton ATPase subunit C 2	0.993567	0.997944	0.203388
PATH:04740	Olfactory transduction	Olfr851	Olfr851	Olfactory receptor MOR155-1	0.999995	0.999995	0.362403
PATH:04740	Olfactory transduction	Olfr290	Olfr290	Olfactory receptor	0.999995	0.999995	0.362403
PATH:04740	Olfactory transduction	Olfr782	Olfr782	Olfactory receptor	0.999995	0.999995	0.362403
PATH:04740	Olfactory transduction	Prkg2	Prkg2	cGMP-dependent protein kinase	0.999995	0.999995	0.362403
PATH:04740	Olfactory transduction	Olfr608	Olfr608	Olfactory receptor	0.999995	0.999995	0.362403
PATH:04740	Olfactory transduction	Olfr550	Olfr550	Olfactory receptor	0.999995	0.999995	0.362403
PATH:04740	Olfactory transduction	Olfr1038-ps	Olfr1038-ps	Olfactory receptor 1038	0.999995	0.999995	0.362403
PATH:04740	Olfactory transduction	Olfr1480	Olfr1480	Olfactory receptor	0.999995	0.999995	0.362403
PATH:04740	Olfactory transduction	Olfr943	Olfr943	Olfactory receptor	0.999995	0.999995	0.362403
PATH:04740	Olfactory transduction	Olfr1484	Olfr1484	Olfactory receptor	0.999995	0.999995	0.362403
PATH:04740	Olfactory transduction	Olfr183	Olfr183	Olfactory receptor 183	0.999995	0.999995	0.362403

## Sheet: UpGene2Pathway
QueryID	QuerySymbol	Description	PathwayID	PathwayTerm	P-Value	Enrichment
Atp6v1c2	Atp6v1c2	V-type proton ATPase subunit C 2	PATH:05323	Rheumatoid arthritis	0.912444	0.418882
Atp6v1c2	Atp6v1c2	V-type proton ATPase subunit C 2	PATH:04145	Phagosome	0.993567	0.203388
Atp6v1c2	Atp6v1c2	V-type proton ATPase subunit C 2	PATH:00190	Oxidative phosphorylation	0.769907	0.748639
Atp6v1c2	Atp6v1c2	V-type proton ATPase subunit C 2	PATH:04966	Collecting duct acid secretion	0.541514	1.30319
Atp6v1c2	Atp6v1c2	V-type proton ATPase subunit C 2	PATH:01100	Metabolic pathways	0.565119	0.986254
Atp6v1c2	Atp6v1c2	V-type proton ATPase subunit C 2	PATH:04721	Synaptic vesicle cycle	0.538698	1.11702
P2rx3	P2rx3	P2X purinoceptor 3	PATH:04020	Calcium signaling pathway	0.159505	1.51338
P2rx3	P2rx3	P2X purinoceptor 3	PATH:04080	Neuroactive ligand-receptor interaction	0.409448	1.12296
Sec11c	Sec11c	Signal peptidase complex catalytic subunit SEC11C	PATH:03060	Protein export	0.178118	2.60637
Rps6ka2	Rps6ka2	Putative uncharacterized protein	PATH:04914	Progesterone-mediated oocyte maturation	0.0109271	2.86398
Rps6ka2	Rps6ka2	Putative uncharacterized protein	PATH:04150	mTOR signaling pathway	0.0100568	3.24794
Rps6ka2	Rps6ka2	Putative uncharacterized protein	PATH:04010	MAPK signaling pathway	0.0847361	1.55805
Rps6ka2	Rps6ka2	Putative uncharacterized protein	PATH:04114	Oocyte meiosis	0.0989738	1.88497
Rps6ka2	Rps6ka2	Putative uncharacterized protein	PATH:04720	Long-term potentiation	0.312511	1.52983
Rps6ka2	Rps6ka2	Putative uncharacterized protein	PATH:04722	Neurotrophin signaling pathway	0.18575	1.56382
Tfg	Tfg	Protein Tfg	PATH:05200	Pathways in cancer	0.00570714	1.92507
Tfg	Tfg	Protein Tfg	PATH:05216	Thyroid cancer	0.209294	2.34574
Olfr851	Olfr851	Olfactory receptor MOR155-1	PATH:04740	Olfactory transduction	0.999995	0.362403
Acsl1	Acsl1	Long-chain-fatty-acid--CoA ligase 1	PATH:00071	Fatty acid degradation	0.750505	0.733043
Acsl1	Acsl1	Long-chain-fatty-acid--CoA ligase 1	PATH:03320	PPAR signaling pathway	0.675534	0.868791
Acsl1	Acsl1	Long-chain-fatty-acid--CoA ligase 1	PATH:04146	Peroxisome	0.682079	0.858196
Acsl1	Acsl1	Long-chain-fatty-acid--CoA ligase 1	PATH:01212	Fatty acid metabolism	0.417933	1.40744
Acsl1	Acsl1	Long-chain-fatty-acid--CoA ligase 1	PATH:01100	Metabolic pathways	0.565119	0.986254
Acsl1	Acsl1	Long-chain-fatty-acid--CoA ligase 1	PATH:04920	Adipocytokine signaling pathway	0.0151648	2.97347
Rft1	Rft1	Rft1 protein	PATH:00510	N-Glycan biosynthesis	0.417933	1.40744
Vangl2	Vangl2	Vang-like protein 2	PATH:04310	Wnt signaling pathway	0.080668	1.78157
[truncated: 876 more rows]
